# Supplementary material for: Peptide profiling in cow urine reveals molecular signature of physiology-driven pathways and in-silico predicted bioactive properties
Source: Sci Rep. 2021 Jun 14;11:12427. doi: 10.1038/s41598-021-91684-4 (PMC8203733; doi:10.1038/s41598-021-91684-4)
Supplement: Supplementary file 1 — Supplementary Information. [file 41598_2021_91684_MOESM1_ESM.xlsx]

## Sheet: cover
		Comprehensive profiling of urinary peptides in cow reveals physiology specific signatures and several bioactive properties
		Rohit Kumar, Syed Azmal Ali, Sumit Kumar Singh, Vanya Bhushan, Jai Kumar Kaushik, Ashok Kumar Mohanty, and Sudarshan Kumar
		Supplementary table 1: List of urinary peptides obtained from different physiological states of Sahiwal cow

## Sheet: Heifer
iprobability	probability	spectrum ID	ions	peptide	protein	calc_neutral_pep_mass
0.999999	1	Heifer19dec_RD3_01_398.00033.00033.3	14/44	SCMAGVLGAKEGEA	E1BEB4	1236.55
0.999999	1	Heifer19dec_RD3_01_398.00131.00131.3	15/44	PPGRGKDGDPGLRG	E1BG60	1223.64
0.999999	1	Heifer19dec_RD3_01_398.00295.00295.3	18/44	LLGTSGFVSSTQRN	A6QPG4	1238.63
0.999999	1	Heifer19dec_RD3_01_398.00307.00307.3	1944-12-01	GAGERPLRLNAAAR	Q3T0E1	1237.69
0.999999	1	Heifer19dec_RD3_01_398.00325.00325.3	1940-12-01	PLLLAEYQGSLEA	F1MZK6	1234.64
0.999999	1	Heifer19dec_RD3_01_398.00398.00398.3	13/40	LILKGTTVLTYKP	E1BIF6	1235.75
0.999999	1	Heifer19dec_RD3_01_398.00455.00455.3	14/36	SILSTCEKDNCS	Q8WN96	1238.53
0.999999	1	Heifer19dec_RD3_01_398.00597.00597.3	13/48	ASAVLSVVAPTPTPA	E1BLM2	1237.69
0.999999	1	Heifer19dec_RD3_01_398.00635.00635.3	15/44	DPNLSAPEKAVNPT	E1BMG8	1235.65
0.999999	1	Heifer19dec_RD3_01_398.00714.00714.3	13/52	GPAPAAPGPAPAEPPA	V6F7Z2	1238.63
0.999999	1	Heifer19dec_RD3_01_398.00813.00813.2	2018-10-01	PNGSPGGVAGIC	F1N4K1	827.414
0.999999	1	Heifer19dec_RD3_01_398.00820.00820.3	1932-11-01	ERFMDCRIGRK	F1MGF2	1225.58
0.999999	1	Heifer19dec_RD3_01_398.01075.01075.3	1936-11-01	AIQQWTSNFVIS	E1BI97	1234.63
0.999999	1	Heifer19dec_RD3_01_398.01095.01095.2	2014-09-01	TGMNDSTGQS	E1BH40	824.297
0.999999	1	Heifer19dec_RD3_01_398.01258.01258.2	2019-10-06	LCHDEEHE	L8I0B8	825.271
0.999999	1	Heifer19dec_RD3_01_398.01260.01260.3	1940-12-01	LPTTDPRVSPRLS	A8E646	1237.68
0.999999	1	Heifer19dec_RD3_01_398.01494.01494.3	14/44	GYSTAAPAYGLPKR	Q08E27	1237.63
0.999999	1	Heifer19dec_RD3_01_398.01578.01578.2	2016-07-01	PIGANGLANPR	D0MU89	825.434
0.999999	1	Heifer19dec_RD3_01_398.01731.01731.3	1940-12-01	RATLKAGDCDCQC	M5FK30	1237.51
0.999999	1	Heifer19dec_RD3_01_398.01755.01755.3	14/44	LLLILAGANVLLQD	L8I498	1236.78
0.999999	1	Heifer19dec_RD3_01_398.01779.01779.3	14/40	YNANIEDAGIYRC	F1MM03	1234.59
0.999999	1	Heifer19dec_RD3_01_398.01805.01805.3	1936-12-01	TRYIFIVKAINQ	G5E5S6	1235.74
0.999999	1	Heifer19dec_RD3_01_398.01837.01837.3	18/52	PSPAKGTPGKGATPAP	E1BHU1	1238.66
0.999999	1	Heifer19dec_RD3_01_398.01857.01857.2	2020-10-01	VGAGGAPAGPAVL	Q0P5L0	823.419
0.999999	1	Heifer19dec_RD3_01_398.01899.01899.3	1944-12-01	GYSTAAPAYGLPKR	Q08E27	1237.63
0.999999	1	Heifer19dec_RD3_01_398.01921.01921.2	2019-12-06	MCPPGMHKW	E1BH40	825.363
0.999999	1	Heifer19dec_RD3_01_398.02039.02039.2	2018-07-01	PVGPTGPVGAAG	P02465	824.439
0.999999	1	Heifer19dec_RD3_01_398.02165.02165.2	2019-10-08	TMLPECCF	Q2TBN8	824.287
0.999999	1	Heifer19dec_RD3_01_398.02221.02221.2	2014-08-01	AGLALVPQKL	E1B768	824.512
0.999999	1	Heifer19dec_RD3_01_398.02247.02247.2	2014-08-01	AGLADDFGEF	F1MI41	822.34
0.999999	1	Heifer19dec_RD3_01_398.02256.02256.2	2014-08-01	LFEITTSAGW	E1B9X0	824.392
0.999999	1	Heifer19dec_RD3_01_398.02276.02276.3	13/48	APGSSNTESTTSLGE	P98091	1236.55
0.999999	1	Heifer19dec_RD3_01_398.02426.02426.3	15/68	KGVKLQDSIVLTRYGGVGRG	A6QPB7	1917.08
0.999999	1	Heifer19dec_RD3_01_398.02478.02478.2	2020-08-01	AVAIVTRSFCIIF	L8HYB0	1277.72
0.999999	1	Heifer19dec_RD3_01_398.02527.02527.2	2016-09-01	QSGLPGLPGQQ	Q7SIB2	824.439
0.999999	1	Heifer19dec_RD3_01_398.02770.02770.3	15/68	PLGSSYMCNKEQTVSVSGAF	L8ISR6	1916.86
0.999999	1	Heifer19dec_RD3_01_398.02920.02920.3	1944-11-01	SGSTGSGVYLRLKE	Q5E9X7	1236.68
0.999999	1	Heifer19dec_RD3_01_398.02926.02926.3	1940-11-01	PPFVAAPLSEMYQ	G3MWP6	1239.58
0.999999	1	Heifer19dec_RD3_01_398.02937.02937.2	2014-07-01	AHVPAASVFT	G3N0N6	826.434
0.999999	1	Heifer19dec_RD3_01_398.03049.03049.3	17/60	-MSPCFLGCVVFCLLQAG	E1BG54	1916.87
0.999999	1	Heifer19dec_RD3_01_398.03095.03095.2	2018-08-01	MELKRLHDRLVS	G3MXX6	1277.76
0.999999	1	Heifer19dec_RD3_01_398.03265.03265.2	2022-08-01	TTGGYNFSSEEGMN	E1BPS5	1277.49
0.999999	1	Heifer19dec_RD3_01_398.03391.03391.2	2020-08-01	GETVHLFMEAGEG	A5PK86	1277.56
0.999999	1	Heifer19dec_RD3_01_398.03403.03403.3	1940-12-01	PVLAENYKTEDGS	G3X6N3	1237.58
0.999999	1	Heifer19dec_RD3_01_398.03414.03414.3	16/52	CRRWLRPEMHTKEQML	A6QPD1	1912.95
0.999999	1	Heifer19dec_RD3_01_398.03422.03422.2	2022-09-01	PPENSDSSTGKKKK	Q3T0Z6	1276.63
0.999999	1	Heifer19dec_RD3_01_398.03497.03497.2	2014-08-01	ACGTPGYVAP	D0NWG4	823.353
0.999999	1	Heifer19dec_RD3_01_398.03537.03537.3	17/76	QAPTPLLASLPAALPMASGKPQ	E1BEH2	1918.06
0.999999	1	Heifer19dec_RD3_01_398.03549.03549.3	18/76	PPATTTAPAQPATAPQPPPNSL	E1B8P8	1913.95
0.999999	1	Heifer19dec_RD3_01_398.03597.03597.3	14/40	AIAAHYFSGEDKR	F1MI95	1236.58
0.999999	1	Heifer19dec_RD3_01_398.03800.03800.2	2022-10-01	KQYLNMPPGGMDGC	F1ME24	1278.54
0.999999	1	Heifer19dec_RD3_01_398.03831.03831.2	2018-09-01	ANGDVGPVSHRQ	L8IHV1	1036.51
0.999999	1	Heifer19dec_RD3_01_398.03859.03859.3	20/72	ARPSSPADVASNGSHGYPTDT	E1B7V9	1913.85
0.999999	1	Heifer19dec_RD3_01_398.03946.03946.2	2022-10-01	FDSGLKAEVLSFIL	L8IMT2	1277.69
0.999999	1	Heifer19dec_RD3_01_398.03967.03967.3	16/64	FNPILNTLANQTGEAYGFS	F1MHQ3	1821.89
0.999999	1	Heifer19dec_RD3_01_398.04024.04024.3	18/64	VAPTTHTIAQARQLSHKRP	E1BBU9	1915.05
0.999999	1	Heifer19dec_RD3_01_398.04035.04035.2	2022-09-01	MMLPSPVTSTPFSV	Q3ZC90	1278.62
0.999999	1	Heifer19dec_RD3_01_398.04057.04057.3	14/40	RNCLLTRPGPGRV	F1MUQ3	1239.65
0.999999	1	Heifer19dec_RD3_01_398.04216.04216.3	13/44	TPDAGLWSPSPGRR	P55106	1238.6
0.999999	1	Heifer19dec_RD3_01_398.04239.04239.2	2019-12-06	CRKGTCGMC	Q2NKT0	824.363
0.999999	1	Heifer19dec_RD3_01_398.04331.04331.2	2022-12-01	EHISATKVAEQPPR	F1N757	1276.68
0.999999	1	Heifer19dec_RD3_01_398.04369.04369.2	2016-07-01	AGSGGPGFTFT	Q58DD3	825.366
0.999999	1	Heifer19dec_RD3_01_398.04403.04403.3	1940-11-01	ASSTHGRNFVSFR	Q8SQG8	1237.58
0.999999	1	Heifer19dec_RD3_01_398.04456.04456.2	2022-08-01	TPETKPPAPPELTV	E1BA35	1275.67
0.999999	1	Heifer19dec_RD3_01_398.04461.04461.3	1940-08-01	DLSDVKLLPPQEV	F1MHA5	1237.69
0.999999	1	Heifer19dec_RD3_01_398.04476.04476.2	2014-07-01	QCPPGGLPEK	Q2TBI8	825.369
0.999999	1	Heifer19dec_RD3_01_398.04479.04479.2	2022-10-01	KSEDYGSSKYSVGC	E1BLU4	1277.54
0.999999	1	Heifer19dec_RD3_01_398.04486.04486.3	13/36	YYELLAIREACL	Q6T5B7	1236.62
0.999999	1	Heifer19dec_RD3_01_398.04586.04586.2	2014-08-01	GIGRSGTFSL	Q3T151	823.419
0.999999	1	Heifer19dec_RD3_01_398.04698.04698.2	2020-07-01	GGWSPLVSNKYQW	G5E5W4	1277.64
0.999999	1	Heifer19dec_RD3_01_398.04831.04831.2	2024-09-01	ATGPPSTVVLGPQQS	L8IAJ7	1279.68
0.999999	1	Heifer19dec_RD3_01_398.04873.04873.2	2014-06-01	FAKIVIPKGF	E1BB22	824.548
0.999999	1	Heifer19dec_RD3_01_398.04876.04876.3	18/68	ANLTHLVADRVTGLDGATYT	E1BDM5	1914.98
0.999999	1	Heifer19dec_RD3_01_398.04886.04886.3	14/40	CVKPQKSRSGPRR	E1BPB1	1238.72
0.999999	1	Heifer19dec_RD3_01_398.04956.04956.2	2022-09-01	LKASPAAIVFPMMV	F1MVR5	1277.65
0.999999	1	Heifer19dec_RD3_01_398.05034.05034.3	1936-12-01	DECQDPNSCIDG	F1MJM5	1236.44
0.999999	1	Heifer19dec_RD3_01_398.05037.05037.2	2020-09-01	SHDVSVTDCFAKA	L8IBP0	1277.57
0.999999	1	Heifer19dec_RD3_01_398.05088.05088.3	18/72	PQKPAPTVVSVAPAVKDPLVK	Q32LL5	1915.11
0.999999	1	Heifer19dec_RD3_01_398.05202.05202.2	2024-10-01	SAEGAGLTDSGSRRR	E1BFK4	1275.62
0.999999	1	Heifer19dec_RD3_01_398.05216.05216.2	2019-12-05	AMGYGSYML	P30535	823.288
0.999999	1	Heifer19dec_RD3_01_398.05219.05219.3	1940-10-01	LGVEKCLSFNAIM	F1N246	1236.62
0.999999	1	Heifer19dec_RD3_01_398.05239.05239.3	16/68	KAEDLLPETASLSENVEISK	L8IXX5	1915.93
0.999999	1	Heifer19dec_RD3_01_398.05244.05244.2	2022-09-01	EALSVAKMQVEMGA	Q4JIJ3	1278.63
0.999999	1	Heifer19dec_RD3_01_398.05263.05263.3	13/40	SGPPCPFPALRED	F1MLY9	1239.61
0.999999	1	Heifer19dec_RD3_01_398.05525.05525.3	13/40	HPETSVRARTYGL	E1B793	1235.63
0.999999	1	Heifer19dec_RD3_01_398.05675.05675.3	15/44	KPLQPSGQNAKAQP	A5D9H4	1237.64
0.999999	1	Heifer19dec_RD3_01_398.05700.05700.2	2019-12-06	YRSTKPVHS	L8IBV7	823.466
0.999999	1	Heifer19dec_RD3_01_398.05781.05781.3	13/44	LVVTDTGNMSVLSS	L8IS53	1237.59
0.999999	1	Heifer19dec_RD3_01_398.05844.05844.2	2019-12-07	DDIEPRPVF	L8IW00	824.439
0.999999	1	Heifer19dec_RD3_01_398.05869.05869.2	2028-10-01	GPAGGEVEGGGPAPPSL	E1BDV5	1277.59
0.999999	1	Heifer19dec_RD3_01_398.05875.05875.3	14/56	KEGGGGGSGPAGHQGLP	F1MS95	1236.55
0.999999	1	Heifer19dec_RD3_01_398.05999.05999.2	2018-08-01	RGNSGPPGIAGQ	E1BB91	825.398
0.999999	1	Heifer19dec_RD3_01_398.06003.06003.3	17/56	NWIDMKRALMMMKFAEK	E1BCY7	1915.92
0.999999	1	Heifer19dec_RD3_01_398.06016.06016.3	13/60	LEKIRLYNVRAPTLRTSL	L8IDK8	1916.1
0.999999	1	Heifer19dec_RD3_01_398.06028.06028.3	16/52	LQAAGHAGCAGPAGDT	G5E660	1238.51
0.999999	1	Heifer19dec_RD3_01_398.06034.06034.2	2014-08-01	NEGEVTHVGV	L8HV77	826.382
0.999999	1	Heifer19dec_RD3_01_398.06037.06037.3	13/44	SVMPSSVASPQVHL	E1BC93	1237.61
0.999999	1	Heifer19dec_RD3_01_398.06049.06049.3	1948-12-01	AAAEAASSSMTKGKE	A6QP11	1237.6
0.999999	1	Heifer19dec_RD3_01_398.06060.06060.3	14/52	NMSGPFGGAVSAAGLT	L8ID13	1236.58
0.999999	1	Heifer19dec_RD3_01_398.06110.06110.2	2018-07-01	TNAIGGPAAGVG	L8IPJ5	825.434
0.999999	1	Heifer19dec_RD3_01_398.06122.06122.3	20/72	FWNLAATRAVFGIQGTAAGLW	E1BH12	1916.03
0.999999	1	Heifer19dec_RD3_01_398.06125.06125.2	2026-10-01	LLALASLAAAPAGPRL	F6QJQ2	1277.75
0.999999	1	Heifer19dec_RD3_01_398.06318.06318.2	2024-10-01	SPASVTDARGPRGPE	F1MUB8	1279.66
0.999999	1	Heifer19dec_RD3_01_398.06396.06396.3	1940-12-01	NLVDNNLLHNGEV	G5E639	1236.61
0.999999	1	Heifer19dec_RD3_01_398.06439.06439.2	2014-07-01	FPVQSSHAVS	F1MGK5	823.419
0.999999	1	Heifer19dec_RD3_01_398.06562.06562.3	16/36	VFYWLVILIVAL	G3N3S8	1235.73
0.999999	1	Heifer19dec_RD3_01_398.06667.06667.3	15/44	LIGTGSSCPGAMWL	F1MGG8	1238.51
0.999999	1	Heifer19dec_RD3_01_398.06669.06669.3	16/44	STDFGNVSFVVPGL	G3X6X9	1237.6
0.999999	1	Heifer19dec_RD3_01_398.06679.06679.2	2014-08-01	EPPMSGLPEF	Q9GLM4	826.389
0.999999	1	Heifer19dec_RD3_01_398.06764.06764.3	13/44	LSPDKINLSTLKGE	L8IXX5	1271.71
0.999999	1	Heifer19dec_RD3_01_398.06788.06788.3	1940-10-01	PALEPPTLPLHHA	P23726	1223.67
0.999999	1	Heifer19dec_RD3_01_398.06825.06825.2	2016-07-01	VPAPGSGVSFH	L8I8Z7	817.397
0.999999	1	Heifer19dec_RD3_01_398.06849.06849.3	15/40	GVGRSMESKLMSL	L8IS53	1223.6
0.999999	1	Heifer19dec_RD3_01_398.07100.07100.3	15/44	YTSSGCVLCAGPEP	A0JNJ4	1236.51
0.999999	1	Heifer19dec_RD3_01_398.07117.07117.3	15/40	PTAFSHVDGVFMP	G3MYU7	1225.54
0.999999	1	Heifer19dec_RD3_01_398.07144.07144.2	2019-10-07	FCPRSFCK	E1BNH7	825.326
0.999999	1	Heifer19dec_RD3_01_398.07272.07272.3	1956-12-01	SRSTSTGSAASSGSNSS	A5D992	1355.59
0.999999	1	Heifer19dec_RD3_01_398.07304.07304.2	2016-07-01	VPAVSSVSHTA	Q32S26	883.44
0.999999	1	Heifer19dec_RD3_01_398.07325.07325.3	1948-12-01	PAGPLPRMDLPPSGQ	F1MTM9	1306.67
0.999999	1	Heifer19dec_RD3_01_398.07372.07372.3	1940-12-01	MHVLSSNIKPRCY	E1BA57	1309.69
0.999999	1	Heifer19dec_RD3_01_398.07833.07833.2	2014-07-01	TPQSSQGTPY	E1BLX2	800.366
0.999999	1	Heifer19dec_RD3_01_398.07893.07893.3	16/56	KHDILLATLKSNLSALE	F1MNM6	1607.92
0.999999	1	Heifer19dec_RD3_01_398.07921.07921.3	13/48	LASLTSGLAVGKTPL	L8I562	1200.67
0.999999	1	Heifer19dec_RD3_01_398.07975.07975.2	2022-09-01	PGGAGQAVHGPVKL	L8ISF6	1076.57
0.999999	1	Heifer19dec_RD3_01_398.08055.08055.2	2024-09-01	ARARYCLTSFAKGQL	E1BD65	1556.79
0.999999	1	Heifer19dec_RD3_01_398.08154.08154.3	14/48	ALHMRIHTGEKPYQC	L8HTQ3	1608.82
0.999999	1	Heifer19dec_RD3_01_398.08262.08262.3	1944-09-01	KKKTTTENGPGNGQ	Q08DN0	1202.59
0.999999	1	Heifer19dec_RD3_01_398.08277.08277.3	17/64	RHARLNDSYRLQRFLADFR	E1BFB0	2121.09
0.999999	1	Heifer19dec_RD3_01_398.08315.08315.3	20/56	NALKPQDSAVYLCASSR	E1BG10	1608.78
0.999999	1	Heifer19dec_RD3_01_398.08325.08325.3	17/76	YEAYDPIGKYATATRFSYTSQH	L8HQ47	2268.07
0.999999	1	Heifer19dec_RD3_01_398.08400.08400.3	21/60	FTGECVLKMLALRQYYFT	E1B9X0	1991
0.999999	1	Heifer19dec_RD3_01_398.08404.08404.3	22/76	QPENNRPPVAVAGPDKELILPV	E1BDP2	2125.15
0.999999	1	Heifer19dec_RD3_01_398.08409.08409.2	2018-09-01	FSPNAPAHFSFV	E1B754	1073.49
0.999999	1	Heifer19dec_RD3_01_398.08449.08449.3	24/76	CRHKMQAASALIGGLAGEKERW	L8J5S1	2122.14
0.999999	1	Heifer19dec_RD3_01_398.08456.08456.2	2026-08-01	NKKKSEPSSPDHVSST	P10894	1511.76
0.999999	1	Heifer19dec_RD3_01_398.08486.08486.3	15/44	FGPLVSDTLLDCRK	A5PKJ3	1344.67
0.999999	1	Heifer19dec_RD3_01_398.08490.08490.3	1956-12-01	EVAPPAGALAEELLPQP	G3N181	1474.8
0.999999	1	Heifer19dec_RD3_01_398.08514.08514.3	22/84	AASVEMWLERVCGHLGLGVQEPHR	A5PK51	2503.21
0.999999	1	Heifer19dec_RD3_01_398.08523.08523.3	16/56	VGSVHCIFGEPRALLTH	G3MZR8	1655.85
0.999999	1	Heifer19dec_RD3_01_398.08526.08526.2	2022-09-01	LSFLTTLAKVYPSS	A7MBJ5	1325.72
0.999999	1	Heifer19dec_RD3_01_398.08529.08529.2	1930-12-01	-MRKVGAPGGQGQAPSGM	L8I0L3	1512.75
0.999999	1	Heifer19dec_RD3_01_398.08540.08540.2	2018-10-01	NIPEHWHYISFG	L8IZV0	1327.63
0.999999	1	Heifer19dec_RD3_01_398.08593.08593.3	15/64	DIHLKKSTLSLDDSDMGTR	F1MAW8	1859.93
0.999999	1	Heifer19dec_RD3_01_398.08596.08596.3	19/76	HLGRPDGVPMPDKYSLQPVAVE	Q3T0P6	2138.12
0.999999	1	Heifer19dec_RD3_01_398.08621.08621.3	19/96	PGGKGEQGLPGLPGPPGLPGVGKPGFP	A7E303	2269.22
0.999999	1	Heifer19dec_RD3_01_398.08652.08652.3	14/44	FFSPDSLKIVDNPK	A0JN94	1330.68
0.999999	1	Heifer19dec_RD3_01_398.08653.08653.3	16/44	QEMRGPQEMRGMQG	E1BCT7	1464.63
0.999999	1	Heifer19dec_RD3_01_398.08682.08682.2	2020-09-01	TSSMPKMMAIFWF	F1MCE6	1327.61
0.999999	1	Heifer19dec_RD3_01_398.08692.08692.3	22/76	FLIDLNSTHGTFLGHIRLEPHK	Q28147	2269.2
0.999999	1	Heifer19dec_RD3_01_398.08702.08702.3	14/56	PTIKDGLTVKAGDTIIL	F1N757	1543.88
0.999999	1	Heifer19dec_RD3_01_398.08711.08711.3	23/72	NASGLLDPLLTANASSRVSSL	F1MT46	1857.98
0.999999	1	Heifer19dec_RD3_01_398.08741.08741.3	15/52	ELSKEPHLATTPRDEA	A6QPB7	1592.82
0.999999	1	Heifer19dec_RD3_01_398.08744.08744.2	2014-10-01	DRIWYECRRP	F1MJA6	1237.61
0.999999	1	Heifer19dec_RD3_01_398.08749.08749.2	2014-07-01	LPAPCLAPQA	Q0VCC6	852.416
0.999999	1	Heifer19dec_RD3_01_398.08792.08792.3	19/92	SAFDQFHLLREGVNLGRPLAGGRGPR	G5E5R9	2576.37
0.999999	1	Heifer19dec_RD3_01_398.08872.08872.2	2014-07-01	GCLLVVLHLL	E1BJ07	965.573
0.999999	1	Heifer19dec_RD3_01_398.08915.08915.3	19/80	PILGGQMLHTVLSMVGLSLIALG	L8IPR0	2181.23
0.999999	1	Heifer19dec_RD3_01_398.08956.08956.3	19/76	DHASLMSGALSPSIIQNLSHSS	F1N215	2049.03
0.999999	1	Heifer19dec_RD3_01_398.08979.08979.3	23/76	PLPNLPSAQSLPFCSREFLPV-	G3N006	2271.17
0.999999	1	Heifer19dec_RD3_01_398.09014.09014.2	1930-08-01	ASSAAGSASGSAAASASA	E1BJG5	1238.54
0.999999	1	Heifer19dec_RD3_01_398.09089.09089.2	2018-08-01	AQPQPSGTGGAV	F1MEW7	898.414
0.999999	1	Heifer19dec_RD3_01_398.09108.09108.2	2026-12-01	TLDARPTGAAQLTVNS	L8J1S8	1425.76
0.999999	1	Heifer19dec_RD3_01_398.09136.09136.3	18/64	DTEPSAEHSPESAAPSTEV	E1BB44	1725.73
0.999999	1	Heifer19dec_RD3_01_398.09176.09176.3	29/108	SGGGNAGAGTAGAAGGGAAGAAGALPLLKS	G3N3S1	2135.11
0.999999	1	Heifer19dec_RD3_01_398.09181.09181.2	2022-09-01	DWFTAETLGVSGTL	Q148G5	1267.61
0.999999	1	Heifer19dec_RD3_01_398.09193.09193.3	14/68	FQAGIPFSAYSAQSLQHMQY	E1BBE1	1962.93
0.999999	1	Heifer19dec_RD3_01_398.09220.09220.2	2028-12-01	GFSPSKSATQVSALHMD	G3MXH3	1605.78
0.999999	1	Heifer19dec_RD3_01_398.09243.09243.3	15/56	GILLAAVLVVSAPALPL	L8IRP3	1445.92
0.999999	1	Heifer19dec_RD3_01_398.09286.09286.3	25/72	DGASRVLYGNRGNNRASRAEL	L8IHY3	2047.04
0.999999	1	Heifer19dec_RD3_01_398.09300.09300.3	1956-11-01	PPSHPASQPPLPASHPT	A7YWJ7	1518.76
0.999999	1	Heifer19dec_RD3_01_398.09307.09307.2	2028-12-01	SRGAQVRHVPMGKLTGG	L8HMC4	1605.89
0.999999	1	Heifer19dec_RD3_01_398.09392.09392.3	14/44	GGYDNSVPYGCGRS	A7MB37	1343.56
0.999999	1	Heifer19dec_RD3_01_398.09442.09442.3	18/64	KNSEFEGGKSTVNCSTTPV	Q3SZ56	1813.78
0.999999	1	Heifer19dec_RD3_01_398.09468.09468.2	2022-09-01	QQPMQPSPHGNVMY	E1BEB3	1337.59
0.999999	1	Heifer19dec_RD3_01_398.09569.09569.2	2018-10-01	LPKMVGIPAAFD	Q3SZ00	1029.57
0.999999	1	Heifer19dec_RD3_01_398.09599.09599.3	20/64	PISQGGIHGRISATGRGVF	P00366	1664.91
0.999999	1	Heifer19dec_RD3_01_398.09700.09700.2	2020-10-01	GKAKSPTQDIFYH	F1MZW1	1296.67
0.999999	1	Heifer19dec_RD3_01_398.09741.09741.3	16/56	GMCIYAFSAAFYSAILE	L8ITQ3	1742.8
0.999999	1	Heifer19dec_RD3_01_398.09757.09757.3	23/100	AAAAAVGRARGGSPAPLPTKVDEATSGL	F1N0G2	2406.26
0.999999	1	Heifer19dec_RD3_01_398.09794.09794.3	21/80	LPAAIPLEAQNFSVPEGGARTLA	F1MY84	2137.12
0.999999	1	Heifer19dec_RD3_01_398.09798.09798.2	2022-10-01	RRVPGAAGTSSEAN	L8J313	1101.54
0.999999	1	Heifer19dec_RD3_01_398.09801.09801.3	18/60	LQAQLCNLPQGSLQNKTK	F1MV76	1798.9
0.999999	1	Heifer19dec_RD3_01_398.09895.09895.3	15/48	FQGLRALVPAAELLE	E1BF59	1349.8
0.999999	1	Heifer19dec_RD3_01_398.09929.09929.3	15/64	NPQQAHQHSGGPGLAQLGA	F1MYU1	1681.83
0.999999	1	Heifer19dec_RD3_01_398.09995.09995.3	15/60	VPVVGSLVGAMPGTATYQ	F1MNJ1	1534.77
0.999999	1	Heifer19dec_RD3_01_398.10001.10001.2	2026-09-01	GKRKSETAVESLELDQ	F1N734	1603.84
0.999999	1	Heifer19dec_RD3_01_398.10051.10051.3	14/52	TPTGKESIVQVHIEVM	Q6URK6	1534.84
0.999999	1	Heifer19dec_RD3_01_398.10104.10104.2	2024-10-01	EPIVPPPLEFSDSES	E1BIS6	1425.7
0.999999	1	Heifer19dec_RD3_01_398.10107.10107.3	14/52	GCRRPDDGLRLLSDMR	E1BNM9	1702.82
0.999999	1	Heifer19dec_RD3_01_398.10180.10180.3	16/60	LVATYTDGQPPESAAWFC	L8IZI2	1738.78
0.999999	1	Heifer19dec_RD3_01_398.10274.10274.3	25/96	LEQLELSVKDGTILKVSNKGLNSYKDP	E1BEB3	2777.48
0.999999	1	Heifer19dec_RD3_01_398.10311.10311.3	17/76	KKVLGVTAAGKEPPNGILPPFE	L8J2X2	2004.14
0.999999	1	Heifer19dec_RD3_01_398.10312.10312.3	16/52	RAAIQEYDNIAKLGQL	F1MXP9	1532.78
0.999999	1	Heifer19dec_RD3_01_398.10335.10335.3	16/68	NGSMVRHSSSPYVVYPPDKP	Q865V0	2004.97
0.999999	1	Heifer19dec_RD3_01_398.10350.10350.3	20/80	QTGSTFTFADLAKSNSGEGFQFG	Q9TSZ8	2211.01
0.999999	1	Heifer19dec_RD3_01_398.10376.10376.2	1930-12-01	PLNGGAFCEGQNVQKTAC	F1MQ73	1692.79
0.999999	1	Heifer19dec_RD3_01_398.10405.10405.2	2022-11-01	YRDNPDASKNANHS	F1MQ43	1337.61
0.999999	1	Heifer19dec_RD3_01_398.10426.10426.3	14/48	SPATSSEAFTPKEGS	L8HU07	1320.62
0.999999	1	Heifer19dec_RD3_01_398.10439.10439.2	2020-12-01	KRAIPDDDLERHW	E1BHZ2	1335.65
0.999999	1	Heifer19dec_RD3_01_398.10465.10465.2	2028-12-01	LPGPSGNMGPQGPKGIP	P23206	1392.68
0.999999	1	Heifer19dec_RD3_01_398.10587.10587.3	1948-10-01	LAKLLEGTGSETSSS	Q3T181	1278.63
0.999999	1	Heifer19dec_RD3_01_398.10653.10653.3	18/60	SASMPHNKDRVHRVKFSS	F1MJ52	1907.99
0.999999	1	Heifer19dec_RD3_01_398.10657.10657.2	2018-09-01	VVNSETPVVVDF	Q95108	1057.53
0.999999	1	Heifer19dec_RD3_01_398.10722.10722.3	22/84	KFPIPSPTFSKSTSAVSEITQPPS	G5E5C7	2317.18
0.999999	1	Heifer19dec_RD3_01_398.10732.10732.2	2024-09-01	NEMETELIGSDKYAA	L8HXG1	1500.67
0.999999	1	Heifer19dec_RD3_01_398.10763.10763.3	20/72	RPPARVETLREEILTDLRVFE	Q3SX22	2253.25
0.999999	1	Heifer19dec_RD3_01_398.10770.10770.2	2028-10-01	GQLHLEVMSGAFTQVFT	A5PJC3	1705.85
0.999999	1	Heifer19dec_RD3_01_398.10772.10772.3	1960-12-01	HLLKASLDKNVFYSTDCE	F1MV84	1872.93
0.999999	1	Heifer19dec_RD3_01_398.10835.10835.2	2014-08-01	NRLTNGDCKL	G3MZC6	962.46
0.999999	1	Heifer19dec_RD3_01_398.10839.10839.2	1930-10-01	KPATPSPATTTFSIYPVS	F1N0Y9	1648.83
0.999999	1	Heifer19dec_RD3_01_398.10856.10856.3	15/68	AGFFASVAMICAIASGSELS	Q3ZC83	1829.87
0.999999	1	Heifer19dec_RD3_01_398.10946.10946.2	2022-10-01	MNSVLAHDAACGQR	E1BLB6	1241.55
0.999999	1	Heifer19dec_RD3_01_398.10981.10981.3	15/60	DVSAFVTAQKVEYTLGEE	F1MX04	1740.89
0.999999	1	Heifer19dec_RD3_01_398.11059.11059.3	1944-12-01	AQPAQPSQLSQPPS	E1BNF6	1276.64
0.999999	1	Heifer19dec_RD3_01_398.11072.11072.2	2020-07-01	LHAGVSERSGYTD	L8HYW3	1162.54
0.999999	1	Heifer19dec_RD3_01_398.11135.11135.3	19/72	EKVSEKTPAEVDPGSFSSNQC	E1B8X8	2005.96
0.999999	1	Heifer19dec_RD3_01_398.11153.11153.3	13/56	YDFLLKFLLVGDSDVGK	A6QQY0	1636.87
0.999999	1	Heifer19dec_RD3_01_398.11165.11165.3	18/60	RAEDEECENDGMGGSLLC	L8II63	1724.65
0.999999	1	Heifer19dec_RD3_01_398.11184.11184.3	15/56	VKARLIKMGHLNSMNIF	E1B9R5	1740.95
0.999999	1	Heifer19dec_RD3_01_398.11199.11199.3	1948-12-01	VNGKGHTMGALYWQL	Q29444	1477.68
0.999999	1	Heifer19dec_RD3_01_398.11331.11331.3	1948-10-01	TSSDYFGNGRVTEFK	F1MJQ3	1477.65
0.999999	1	Heifer19dec_RD3_01_398.11414.11414.2	2024-08-01	KVVWESLHNVDGDGN	Q2KI23	1425.65
0.999999	1	Heifer19dec_RD3_01_398.11471.11471.2	2020-08-01	SGAPPASGHSHRP	A7YWM1	1072.52
0.999999	1	Heifer19dec_RD3_01_398.11493.11493.2	2022-11-01	VRLAAGPGRCAGRV	G5E5D7	1240.66
0.999999	1	Heifer19dec_RD3_01_398.11534.11534.2	2018-08-01	YNLLKLDFKGN-	E1BCD7	1160.66
0.999999	1	Heifer19dec_RD3_01_398.11537.11537.3	14/48	LPQIKAETASVCSTT	F1MTX3	1390.68
0.999999	1	Heifer19dec_RD3_01_398.11598.11598.3	18/72	AQRGLAIAAIVIGIIALACSL	L8I3P6	1909.12
0.999999	1	Heifer19dec_RD3_01_398.11623.11623.3	20/72	GIPVEARKKSEAGSEAGQDRR	E1BG05	2027.04
0.999999	1	Heifer19dec_RD3_01_398.11655.11655.3	1952-12-01	TTRRCLLEGYDTKNTR	L8IU83	1725.85
0.999999	1	Heifer19dec_RD3_01_398.11696.11696.3	16/68	QMPYTTMRIKEAMRLYPPVP	Q4F8H2	2212.12
0.999999	1	Heifer19dec_RD3_01_398.11709.11709.3	19/64	GGLGERVLGFCQLNLPSAK	A2VDL6	1829.95
0.999999	1	Heifer19dec_RD3_01_398.11715.11715.3	15/56	PYECSQCGRSFTTQTHW	G3N0N0	1860.75
0.999999	1	Heifer19dec_RD3_01_398.11811.11811.2	2022-08-01	QQVNLQSLVGRPQG	F1MGR0	1337.74
0.999999	1	Heifer19dec_RD3_01_398.11826.11826.3	16/60	LCLPAAYCERAMMRFSEL	L8IZZ1	2006.85
0.999999	1	Heifer19dec_RD3_01_398.11840.11840.3	13/52	GQEAGLCLDPGPPSHA	L8I563	1476.67
0.999999	1	Heifer19dec_RD3_01_398.11841.11841.3	1964-12-01	APLSPFLGQLDEDYRARET	F1MJN1	2004.99
0.999999	1	Heifer19dec_RD3_01_398.11864.11864.3	18/72	QGVRNYSTPVGLDSKVLVDLV	Q2KI24	2031.1
0.999999	1	Heifer19dec_RD3_01_398.11925.11925.3	1948-11-01	PQPPTAPKGASDAKL	E1B7I1	1266.66
0.999999	1	Heifer19dec_RD3_01_398.12017.12017.3	20/80	SLALFPHVSTTAFMQPDRAGIFR	L8ISJ7	2334.18
0.999999	1	Heifer19dec_RD3_01_398.12140.12140.2	2022-09-01	LSAIVSLACLGFFL	Q8SPQ5	1283.66
0.999999	1	Heifer19dec_RD3_01_398.12194.12194.2	2022-09-01	LHSVLNISSQEGRF	G3MWT3	1325.67
0.999999	1	Heifer19dec_RD3_01_398.12218.12218.2	2014-09-01	QFHRSLRTMS	Q17QV7	1062.54
0.999999	1	Heifer19dec_RD3_01_398.12225.12225.2	2016-09-01	LTAFGVQKPTM	Q2TA30	947.508
0.999999	1	Heifer19dec_RD3_01_398.12253.12253.2	2018-09-01	PPIKPGARGAQP	F1MIY8	993.572
0.999999	1	Heifer19dec_RD3_01_398.12319.12319.2	1940-10-01	GLPGLPGPIGFLGNSGLPGATGL	F1MJY9	1891.02
0.999999	1	Heifer19dec_RD3_01_398.12354.12354.3	16/60	SLAEIAGRLGPFGFFGTT	G5E6N2	1651.87
0.999999	1	Heifer19dec_RD3_01_398.12355.12355.2	2018-10-01	AEVNGGLPAAST	F1MVI6	913.451
0.999999	1	Heifer19dec_RD3_01_398.12357.12357.2	2018-10-01	PINIQTDSVTFD	L8IN15	1136.57
0.999999	1	Heifer19dec_RD3_01_398.12383.12383.3	16/56	SAADAVTGLKLVEEGVP	Q0VCP0	1470.79
0.999999	1	Heifer19dec_RD3_01_398.12425.12425.2	2016-08-01	VAISGGQILVA	L8HPQ4	856.502
0.999999	1	Heifer19dec_RD3_01_398.12465.12465.3	16/44	PGNPQKECATVFAH	Q864U1	1320.61
0.999999	1	Heifer19dec_RD3_01_398.12474.12474.3	15/44	QPEPFACGIEHCSV	A2VDK7	1402.56
0.999999	1	Heifer19dec_RD3_01_398.12503.12503.2	2016-08-01	DIGRVVIGLFG	P80311	972.612
0.999999	1	Heifer19dec_RD3_01_398.12553.12553.3	14/48	EAPEEMLDLAEKVPS	E1BPD7	1456.71
0.999999	1	Heifer19dec_RD3_01_398.12555.12555.3	17/56	GFTGDKCQTDMNECLSE	L8IK78	1820.7
0.999999	1	Heifer19dec_RD3_01_398.12573.12573.2	2016-10-01	RCAGCGIRTDP	F6QIF2	1008.41
0.999999	1	Heifer19dec_RD3_01_398.12590.12590.2	2018-09-01	TVPMTGTKSGNE	A4IFA3	1006.48
0.999999	1	Heifer19dec_RD3_01_398.12622.12622.3	17/44	MREKQFSQARPLTR	F1MD97	1459.79
0.999999	1	Heifer19dec_RD3_01_398.12638.12638.1	2016-08-01	DPASGEGVPPG	P01267	809.392
0.999999	1	Heifer19dec_RD3_01_398.12685.12685.3	17/56	GALPSPLQPGAGLPALS	A6QNZ1	1400.8
0.999999	1	Heifer19dec_RD3_01_398.12694.12694.2	1934-12-01	EMASASSSGGGYGGSGDGYN	E1BK61	1582.58
0.999999	1	Heifer19dec_RD3_01_398.12700.12700.3	17/68	PAASTSGGGGSGSPGPDGSA	E1BPD8	1404.58
0.999999	1	Heifer19dec_RD3_01_398.12729.12729.3	17/56	HCLFLKGAAVAFLNDEV	Q59A28	1666.84
0.999999	1	Heifer19dec_RD3_01_398.12731.12731.2	2026-10-01	PMPTDEGSVMCQCLGP	G3N0C7	1583.61
0.999999	1	Heifer19dec_RD3_01_398.12758.12758.3	16/84	KNLLLLGATAIEDRLQAGVPETIA	C7EXK4	2306.28
0.999999	1	Heifer19dec_RD3_01_398.12787.12787.2	2028-10-01	SNILSEVTAVFTDKDAN	F1MND3	1621.82
0.999999	1	Heifer19dec_RD3_01_398.12788.12788.2	2026-09-01	EQANEDPSDSTESEEV	Q95120	1536.57
0.999999	1	Heifer19dec_RD3_01_398.12792.12792.3	17/52	HMKATVRHEMTEGITA	Q5H9M6	1634.78
0.999999	1	Heifer19dec_RD3_01_398.12834.12834.3	14/40	KLIEGVLDFKAML	Q08DN5	1234.66
0.999999	1	Heifer19dec_RD3_01_398.12836.12836.3	15/48	GPPDNFAVGPVNQFD	F1N5A3	1400.67
0.999999	1	Heifer19dec_RD3_01_398.12861.12861.3	19/52	REITLKGFREGSFKVL	L8HUH9	1609.88
0.999999	1	Heifer19dec_RD3_01_398.12883.12883.2	2018-09-01	RSAGSSPTRDPK	G3MWG7	973.447
0.999999	1	Heifer19dec_RD3_01_398.12899.12899.3	13/40	ARMSFVLAAYQMV	A0N0X6	1331.64
0.999999	1	Heifer19dec_RD3_01_398.12913.12913.3	18/56	DFTGTLAETVDMQKGRY	L8I5P9	1668.81
0.999999	1	Heifer19dec_RD3_01_398.13006.13006.3	14/52	GQKAAPRTEPSGRRGS	F1N6S8	1509.81
0.999999	1	Heifer19dec_RD3_01_398.13012.13012.3	17/44	EFRALIAEPRMGKL	Q08E59	1387.78
0.999999	1	Heifer19dec_RD3_01_398.13033.13033.1	2014-10-01	SPSSPETPPP	F1MPW8	810.376
0.999999	1	Heifer19dec_RD3_01_398.13055.13055.2	2020-12-01	AADGERGPPANQE	G3X6H0	1110.51
0.999999	1	Heifer19dec_RD3_01_398.13079.13079.1	2014-09-01	RVNLESPGPE	P86435	811.408
0.999999	1	Heifer19dec_RD3_01_398.13090.13090.3	19/84	TVAAKKGKPSLDTASKPKRAPKQK	F1MU48	2305.36
0.999999	1	Heifer19dec_RD3_01_398.13160.13160.3	21/80	TYQALYELTQPINHSVANSTGVY	L8IG88	2304.14
0.999999	1	Heifer19dec_RD3_01_398.13162.13162.2	1936-12-01	PSGTQSEGGGSSSSGTGSPGP	L8I0J2	1582.63
0.999999	1	Heifer19dec_RD3_01_398.13167.13167.3	14/48	KVGELTGRPPMPVHP	L8IAV6	1388.72
0.999999	1	Heifer19dec_RD3_01_398.13207.13207.2	2016-09-01	RHTALAANTQS	L8IJ73	925.462
0.999999	1	Heifer19dec_RD3_01_398.13240.13240.1	2016-09-01	SPSSPPASAPH	G5E5D0	809.392
0.999999	1	Heifer19dec_RD3_01_398.13257.13257.3	23/96	NPGLAAVAAAGPKASVEVGEKPGLWRA	E1B9N0	2430.34
0.999999	1	Heifer19dec_RD3_01_398.13264.13264.3	19/56	LIRVLRAFTSSVPLLPG	L8HZS8	1668.01
0.999999	1	Heifer19dec_RD3_01_398.13266.13266.3	20/76	TCWKKVLLGEIISDTNEKASLD	E1B906	2303.22
0.999999	1	Heifer19dec_RD3_01_398.13278.13278.3	21/88	TPGRTSPAVMQPPPGMSLPPADIGP	Q58D45	2304.12
0.999999	1	Heifer19dec_RD3_01_398.13283.13283.3	17/56	ARAEHRGTAGEPEVMES	A5PJU0	1667.77
0.999999	1	Heifer19dec_RD3_01_398.13352.13352.2	2018-11-01	VEVEFGGGAELL	Q148F0	1006.46
0.999999	1	Heifer19dec_RD3_01_398.13382.13382.3	15/60	GRPSAAGSPEQSSRSHLD	A2VDL5	1665.82
0.999999	1	Heifer19dec_RD3_01_398.13393.13393.3	13/40	SGSCLKIMAVSRR	G3MX93	1236.63
0.999999	1	Heifer19dec_RD3_01_398.13400.13400.2	14/28	CEALVDTGTALIKGPRR	A7MBA4	1539.86
0.999999	1	Heifer19dec_RD3_01_398.13413.13413.2	2016-08-01	PCGGTGGSKT-	A5D7T5	823.349
0.999999	1	Heifer19dec_RD3_01_398.13470.13470.3	16/76	YEAALETIQNMSKVVDSLYNKA	Q2KI42	2252.14
0.999999	1	Heifer19dec_RD3_01_398.13488.13488.3	17/60	SSGGVCGLGGGYGGGFSS	L8HP74	1387.58
0.999999	1	Heifer19dec_RD3_01_398.13498.13498.2	2014-08-01	LGSPNGSFYS	E1B7B4	827.345
0.999999	1	Heifer19dec_RD3_01_398.13600.13600.3	1944-12-01	AIQLGSAVFFGSTE	F1MHD1	1225.63
0.999999	1	Heifer19dec_RD3_01_398.13628.13628.2	2026-09-01	WYFKLLDKNNSGDIGK	L8I426	1582.8
0.999999	1	Heifer19dec_RD3_01_398.13641.13641.3	18/84	ARFGFAMGALPDLNQDGFADVAVG	E1BDD5	2310.11
0.999999	1	Heifer19dec_RD3_01_398.13644.13644.2	2018-09-01	AMTSLPAKTTGV	E1B943	1005.52
0.999999	1	Heifer19dec_RD3_01_398.13661.13661.2	2020-10-01	LARQASLPGSPEV	L8J3Z5	1111.56
0.999999	1	Heifer19dec_RD3_01_398.13699.13699.3	16/36	DFDVHTMKTLKN	E1BPM5	1234.64
0.999999	1	Heifer19dec_RD3_01_398.13750.13750.3	16/60	YPGPFPSLPGFGSSGGVG	L8IXA0	1458.71
0.999999	1	Heifer19dec_RD3_01_398.13763.13763.3	16/60	PHGAVTIPRSTSDTDLVT	L8IC71	1667.85
0.999999	1	Heifer19dec_RD3_01_398.13780.13780.3	14/40	LSTYPELNSSIKM	L8HXB6	1237.62
0.999999	1	Heifer19dec_RD3_01_398.13798.13798.3	14/44	SVLPSGEGHLETSS	P13608	1224.6
0.999999	1	Heifer19dec_RD3_01_398.13806.13806.3	16/52	QMFGGFGFVTFENSAD	Q17QD3	1509.66
0.999999	1	Heifer19dec_RD3_01_398.13820.13820.2	2016-07-01	AFDKKLEDMSS	L8IJV4	1111.52
0.999999	1	Heifer19dec_RD3_01_398.13897.13897.3	18/60	TTLHAFAGIGSGQAPLAQ	F1MMJ1	1509.79
0.999999	1	Heifer19dec_RD3_01_398.13946.13946.2	2018-07-01	LIPATIQDKLIL	Q5EA83	1110.66
0.999999	1	Heifer19dec_RD3_01_398.14043.14043.2	2014-06-01	VSGIRTPPVR	L8HMW3	825.471
0.999999	1	Heifer19dec_RD3_01_398.14058.14058.2	2016-09-01	LQSLDSPELSA	E1BNT2	974.456
0.999999	1	Heifer19dec_RD3_01_402.00020.00020.2	2016-06-01	SVVVGPSVVAV	P12763	825.496
0.999999	1	Heifer19dec_RD3_01_402.00037.00037.3	14/44	DTEGLGDMEKGDSK	Q0V7P3	1237.51
0.999999	1	Heifer19dec_RD3_01_402.00532.00532.3	1936-11-01	AIQKCDPAPFYL	O97594	1237.58
0.999999	1	Heifer19dec_RD3_01_402.00629.00629.2	2019-12-07	AQHMLPGQN	F1N0G2	825.38
0.999999	1	Heifer19dec_RD3_01_402.00734.00734.2	2019-12-06	AFNIVYVAL	Q58DA8	824.443
0.999999	1	Heifer19dec_RD3_01_402.00774.00774.2	2016-06-01	AILNVGAPAAG	A1A4J1	824.476
0.999999	1	Heifer19dec_RD3_01_402.00839.00839.2	2019-12-07	SRTPGHQEN	F1MV76	823.394
0.999999	1	Heifer19dec_RD3_01_402.01069.01069.2	2019-12-08	LFVTFLPTW	A4FV92	823.448
0.999999	1	Heifer19dec_RD3_01_402.01234.01234.3	1960-12-01	SGGYGGGSSSGGGHGGSS	P06394	1236.48
0.999999	1	Heifer19dec_RD3_01_402.01246.01246.3	1940-09-01	WINRITAASQEHG	Q2TBR2	1238.64
0.999999	1	Heifer19dec_RD3_01_402.01252.01252.3	13/36	QCKELLGLIYER	F1N1C9	1236.64
0.999999	1	Heifer19dec_RD3_01_402.01478.01478.3	14/44	FGAGEGLVRPQVRS	E1BP14	1237.69
0.999999	1	Heifer19dec_RD3_01_402.01589.01589.2	2016-11-01	QSQGKGPGPVQ	E1B7X2	825.434
0.999999	1	Heifer19dec_RD3_01_402.01622.01622.3	14/52	DPSSSGSPAHGGGSRF	Q58DI5	1239.56
0.999999	1	Heifer19dec_RD3_01_402.01756.01756.2	2020-08-01	LGGGGAGGPLLAE	F1MZB7	825.434
0.999999	1	Heifer19dec_RD3_01_402.01766.01766.2	2016-07-01	GIGGSVGSHLG	F1MXC9	825.434
0.999999	1	Heifer19dec_RD3_01_402.01838.01838.2	2016-08-01	VATSPGEPGLL	F1MIU7	827.403
0.999999	1	Heifer19dec_RD3_01_402.01855.01855.3	1940-11-01	TLNTTTEEMEAVS	F1MSP8	1236.55
0.999999	1	Heifer19dec_RD3_01_402.01943.01943.2	2014-07-01	HTGKKAHGKG	Q29RN3	825.482
0.999999	1	Heifer19dec_RD3_01_402.02042.02042.3	1944-11-01	DPTASGTKENYGLL	A7YWG7	1236.6
0.999999	1	Heifer19dec_RD3_01_402.02048.02048.2	2014-07-01	SGSALFYLGL	E1BCC7	826.423
0.999999	1	Heifer19dec_RD3_01_402.02131.02131.2	2014-07-01	LQKHSAGNSL	F1MNV8	827.389
0.999999	1	Heifer19dec_RD3_01_402.02162.02162.2	2016-10-01	LPVGGGAGRRS	O77480	825.457
0.999999	1	Heifer19dec_RD3_01_402.02206.02206.3	1944-10-01	DSLQNGPACPAPEL	F1MZJ7	1239.56
0.999999	1	Heifer19dec_RD3_01_402.02214.02214.2	2014-06-01	SLGTGMMLSS	L8I9T9	824.377
0.999999	1	Heifer19dec_RD3_01_402.03108.03108.3	1940-11-01	LVLLSLDYLTSLF	Q58DD2	1235.7
0.999999	1	Heifer19dec_RD3_01_402.03142.03142.3	18/72	PTSSGPSQGSSCLEVLSMSSL	Q32LN6	1915.81
0.999999	1	Heifer19dec_RD3_01_402.03273.03273.2	2022-11-01	TSGLAVILFIKAMF	E1BC85	1277.74
0.999999	1	Heifer19dec_RD3_01_402.03418.03418.3	13/44	QKGGSSVTSRETQD	L8I5A1	1235.61
0.999999	1	Heifer19dec_RD3_01_402.03458.03458.3	20/60	RGIDTEKVLQICPKDMRA	O18965	1917.97
0.999999	1	Heifer19dec_RD3_01_402.03479.03479.3	18/72	GPPGPPGHLTAALGDIMGHYD	F1N2Y2	1915.93
0.999999	1	Heifer19dec_RD3_01_402.03484.03484.3	18/64	ASTLKIPKSQNQRGMEIAK	L8IXB8	1916.01
0.999999	1	Heifer19dec_RD3_01_402.03508.03508.3	1948-11-01	EPQQALPPESKGAAS	Q3B7N6	1292.67
0.999999	1	Heifer19dec_RD3_01_402.03567.03567.2	2016-06-01	GLSAPGLSVLE	Q32PG9	855.507
0.999999	1	Heifer19dec_RD3_01_402.03569.03569.3	17/56	EGAYSGGEAAEGAAARP	M1NM98	1336.6
0.999999	1	Heifer19dec_RD3_01_402.03582.03582.3	16/64	TPAMSRPAELYTQILAVRP	Q9TTA5	1915.04
0.999999	1	Heifer19dec_RD3_01_402.03602.03602.2	2020-09-01	GVAAPGGAGGGLL	A7YWE2	825.434
0.999999	1	Heifer19dec_RD3_01_402.03659.03659.2	2016-08-01	SPSGSSGHAQP	F1MYY2	826.357
0.999999	1	Heifer19dec_RD3_01_402.03709.03709.2	2022-09-01	ASGTDASLSPGSAE	L8HRV9	1048.47
0.999999	1	Heifer19dec_RD3_01_402.03783.03783.2	2018-07-01	ADHVLQGGGRRR	G3N001	1093.57
0.999999	1	Heifer19dec_RD3_01_402.03796.03796.3	16/64	PAPPCTSFESCAADMRSMQ	E1BH94	1916.75
0.999999	1	Heifer19dec_RD3_01_402.03832.03832.3	1948-09-01	GPGDSPEGPEAEGPE	A6QQ47	1237.51
0.999999	1	Heifer19dec_RD3_01_402.03845.03845.3	21/64	LRKHGEEQQLPAVGLTNHQ	F1N476	1912.99
0.999999	1	Heifer19dec_RD3_01_402.03903.03903.2	2024-10-01	SDFSASMGSGSVSFC	F1MRU6	1277.52
0.999999	1	Heifer19dec_RD3_01_402.04051.04051.3	16/60	GTMKSLKKESRLRIPTNR	L8IWD2	1917.08
0.999999	1	Heifer19dec_RD3_01_402.04071.04071.2	2019-12-08	YVDPTTMYE	Q0VC84	825.358
0.999999	1	Heifer19dec_RD3_01_402.04133.04133.3	1944-12-01	DKVKGHILLTAGVL	A4IFM4	1234.78
0.999999	1	Heifer19dec_RD3_01_402.04142.04142.2	2020-08-01	GGWSPLVSNKYQW	G5E5W4	1277.64
0.999999	1	Heifer19dec_RD3_01_402.04221.04221.2	2022-10-01	KSEDYGSSKYSVGC	E1BLU4	1277.54
0.999999	1	Heifer19dec_RD3_01_402.04224.04224.2	2020-10-01	AGGRLEEMTFLQP	L8IAC0	1279.62
0.999999	1	Heifer19dec_RD3_01_402.04380.04380.3	1948-12-01	GQAVVGPPGAKGEKG	E1B7H2	1236.68
0.999999	1	Heifer19dec_RD3_01_402.04406.04406.3	13/40	ADTACDSDVLLQL	L8IP97	1235.53
0.999999	1	Heifer19dec_RD3_01_402.04415.04415.2	2019-12-06	SSVILYETH	E1B8R8	823.433
0.999999	1	Heifer19dec_RD3_01_402.04429.04429.2	2014-08-01	RKLNGHSGLL	A6QLS6	824.451
0.999999	1	Heifer19dec_RD3_01_402.04434.04434.2	2014-08-01	FPTMVGSSMQ	L8IX92	824.341
0.999999	1	Heifer19dec_RD3_01_402.04470.04470.2	2020-08-01	LDNPYREPKSTAA	E1BJA5	1276.6
0.999999	1	Heifer19dec_RD3_01_402.04505.04505.2	2018-08-01	PRDVLRHLQELA	L8HZW2	1277.72
0.999999	1	Heifer19dec_RD3_01_402.04598.04598.2	2020-10-01	AYMVAGTVHWLSN	P58353	1278.61
0.999999	1	Heifer19dec_RD3_01_402.04606.04606.2	2026-11-01	DSGALGPRGPPGQKGD	G3MYG7	1277.68
0.999999	1	Heifer19dec_RD3_01_402.04691.04691.3	1940-12-01	PLLLAEYQGSLEA	F1MZK6	1234.64
0.999999	1	Heifer19dec_RD3_01_402.04782.04782.2	2020-09-01	ESDEIPPFHSLHP	L8J2B5	1277.6
0.999999	1	Heifer19dec_RD3_01_402.04828.04828.2	2024-12-01	SDGRSQPGGHGVGRE	F1MCN4	1278.62
0.999999	1	Heifer19dec_RD3_01_402.04831.04831.2	2024-11-01	EGQKLGVGVRGRPGS	F1N0T1	1279.75
0.999999	1	Heifer19dec_RD3_01_402.04865.04865.2	2014-08-01	PSSFSPATMK	G3N2Y1	826.353
0.999999	1	Heifer19dec_RD3_01_402.04868.04868.3	19/72	APAIQQVEAGFKGTAVAVTKG	L8IDJ8	1914.06
0.999999	1	Heifer19dec_RD3_01_402.04933.04933.3	21/68	LYQQAAPQEGAEGEAKPKDD	Q95KN2	1915.89
0.999999	1	Heifer19dec_RD3_01_402.04973.04973.2	2018-09-01	RKRPKKRGRPRT	F1MGF2	1277.83
0.999999	1	Heifer19dec_RD3_01_402.05035.05035.2	2020-09-01	LQTPIVTNHLVRL	F1MB06	1276.73
0.999999	1	Heifer19dec_RD3_01_402.05107.05107.3	16/64	EEFQPDLVVLSGLHMMEGQ	A2VE47	1916.9
0.999999	1	Heifer19dec_RD3_01_402.05116.05116.2	2022-08-01	YIVEALLGVPLVRC	Q2KJ92	1277.81
0.999999	1	Heifer19dec_RD3_01_402.05119.05119.3	17/60	RREKPEEIKMDISKLNAH	L8HVT9	1916
0.999999	1	Heifer19dec_RD3_01_402.05129.05129.2	2028-11-01	PAPSPGGGDVAAQHGGY	Q08DH4	1276.58
0.999999	1	Heifer19dec_RD3_01_402.05148.05148.3	17/68	TMCSSSSGAVNQDHSQNPIG	F1MIY8	1917.79
0.999999	1	Heifer19dec_RD3_01_402.05160.05160.2	2022-12-01	LVRDPGAHSLGHMG	E1B8T3	1275.61
0.999999	1	Heifer19dec_RD3_01_402.05186.05186.3	15/68	RKPPAFSFVSPTNQKTPPAP	E1BQ40	1913
0.999999	1	Heifer19dec_RD3_01_402.05229.05229.2	2022-09-01	LPAHKGELVVSLKY	L8IAK4	1276.75
0.999999	1	Heifer19dec_RD3_01_402.05292.05292.2	2020-11-01	HDRVRLLGALEHK	E1B7B9	1277.72
0.999999	1	Heifer19dec_RD3_01_402.05336.05336.3	17/68	SPSGLRPRGYTISDSAPSRR	E1BNT2	1915.99
0.999999	1	Heifer19dec_RD3_01_402.05343.05343.3	13/52	SKASAAASGTTSSSNT	F1MYQ7	1238.57
0.999999	1	Heifer19dec_RD3_01_402.05364.05364.3	18/64	TLSDGRHLLALDSFSILCL	G3N316	1915.98
0.999999	1	Heifer19dec_RD3_01_402.05369.05369.3	16/72	DNLTQCKVVSVIPSAGGETGS	L8IWM3	1915.97
0.999999	1	Heifer19dec_RD3_01_402.05447.05447.2	2016-07-01	ENGGGQGYSSG	L8HQK6	825.325
0.999999	1	Heifer19dec_RD3_01_402.05465.05465.3	25/80	QEDYPLSKAVAAAAAAAAASGND	F1N772	1917.94
0.999999	1	Heifer19dec_RD3_01_402.05508.05508.2	2016-09-01	ANGAVAGLQPA	L8HQH6	825.434
0.999999	1	Heifer19dec_RD3_01_402.05642.05642.3	18/60	SKLHVHFMGHMGMKPHKC	E1BDK1	1913.97
0.999999	1	Heifer19dec_RD3_01_402.05675.05675.3	24/64	DLRAIGKLPIAMRALTNYQ	E1BKR6	1916.1
0.999999	1	Heifer19dec_RD3_01_402.05769.05769.3	19/64	SEPTIVTRVPDFMDVIGQR	E1B7B4	1915.97
0.999999	1	Heifer19dec_RD3_01_402.05792.05792.3	16/60	QNYYAQWGYDQNTGSYSY	Q1RMJ7	1915.76
0.999999	1	Heifer19dec_RD3_01_402.05830.05830.3	15/80	MPTVTSTIPAVPGVGGIIGALPG	F1MLK4	1916.1
0.999999	1	Heifer19dec_RD3_01_402.05872.05872.3	19/60	NKKQQQQMKTEGPTLKQD	L8I7K6	1916.01
0.999999	1	Heifer19dec_RD3_01_402.05946.05946.2	2019-12-06	FITPTHEEV	F1MDL2	825.387
0.999999	1	Heifer19dec_RD3_01_402.05984.05984.2	2020-12-01	LTEMLKTVKTVKA	L8IX67	1276.74
0.999999	1	Heifer19dec_RD3_01_402.06034.06034.3	1948-12-01	GSSPGPTVLSPLPSP	E1BJX5	1237.66
0.999999	1	Heifer19dec_RD3_01_402.06041.06041.2	2020-09-01	VIKNAIVESIEYR	A4IFJ5	1277.69
0.999999	1	Heifer19dec_RD3_01_402.06044.06044.3	18/68	KLKSAESSPQSETSVVPRLS	E1B7E3	1914.01
0.999999	1	Heifer19dec_RD3_01_402.06100.06100.3	15/56	VINEMRRIARHFRFGNQ	E1B9W9	1916.01
0.999999	1	Heifer19dec_RD3_01_402.06110.06110.3	13/44	FLPEGSKLVPVAKV	Q3T063	1236.74
0.999999	1	Heifer19dec_RD3_01_402.06165.06165.3	21/64	YSPDFEKLKPGYLKEIPGR	L8IWK6	1917.02
0.999999	1	Heifer19dec_RD3_01_402.06304.06304.3	17/56	GGRSGGGLTGPPLGGGG	E1BKJ6	1238.64
0.999999	1	Heifer19dec_RD3_01_402.06400.06400.3	20/72	MASGDPVLVLAPQPLPQASRH	O77801	1915.05
0.999999	1	Heifer19dec_RD3_01_402.06428.06428.2	2019-12-06	PVNSLEKHS	F1MWH8	825.434
0.999999	1	Heifer19dec_RD3_01_402.06546.06546.3	1940-10-01	ASSLLQKSKLGFL	Q58DC2	1206.7
0.999999	1	Heifer19dec_RD3_01_402.06664.06664.3	13/44	YITEAELVAGNGYR	Q2KHY5	1235.6
0.999999	1	Heifer19dec_RD3_01_402.06756.06756.3	1944-12-01	GRGSISSGLEFVSH	L8II46	1237.63
0.999999	1	Heifer19dec_RD3_01_402.07151.07151.2	2018-08-01	QAPRGRAPPRPP	F1MN70	1073.62
0.999999	1	Heifer19dec_RD3_01_402.07531.07531.3	13/52	VAPGPGLAPPAQPGAP	A2VE44	1199.63
0.999999	1	Heifer19dec_RD3_01_402.07607.07607.2	2014-08-01	GPPGLPGHQG	F1N6W9	801.413
0.999999	1	Heifer19dec_RD3_01_402.07612.07612.3	15/44	LISKGKKTGAKGKR	A7YY35	1201.75
0.999999	1	Heifer19dec_RD3_01_402.07657.07657.3	13/36	NPQACSKKVQRS	A6QNY0	1200.64
0.999999	1	Heifer19dec_RD3_01_402.07751.07751.2	14/42	AGTHSGRAAAAAAAAAAAAAAASG	F1MT63	1765.88
0.999999	1	Heifer19dec_RD3_01_402.07797.07797.2	2028-12-01	SAHIMGEAMERVYGGCL	Q3ZBV8	1679.72
0.999999	1	Heifer19dec_RD3_01_402.07813.07813.2	1930-11-01	QDTLMAVPLALALVVVRF	Q5E9R6	1680
0.999999	1	Heifer19dec_RD3_01_402.07851.07851.2	1930-09-01	MAEAAAAPISPWTMAATL	Q3B7M4	1557.75
0.999999	1	Heifer19dec_RD3_01_402.07961.07961.3	15/36	KTHTVSFQRPKG	L8IUS7	1199.64
0.999999	1	Heifer19dec_RD3_01_402.07966.07966.3	23/80	PEDEVTSSLGDASPEPPNLEREH	G3N2D0	2270.02
0.999999	1	Heifer19dec_RD3_01_402.07970.07970.3	16/60	MKIYSQKTMANACTLVMC	P35246	1857.92
0.999999	1	Heifer19dec_RD3_01_402.07974.07974.3	18/72	LQEHMYPAPSSPEKDQLLERR	F1MJA5	2254.07
0.999999	1	Heifer19dec_RD3_01_402.08025.08025.3	13/56	GSAFFEVKQTTEPNFPE	L8IXZ8	1740.84
0.999999	1	Heifer19dec_RD3_01_402.08033.08033.3	21/72	TLKPGTMSPEAFLQEAQVMKK	L8IJB0	2120.06
0.999999	1	Heifer19dec_RD3_01_402.08051.08051.3	15/60	VSWNSTGSVVACAYGRLD	F1MTS5	1726.81
0.999999	1	Heifer19dec_RD3_01_402.08052.08052.3	15/60	PFQKHITERAQAVEASFK	E1B993	1860.95
0.999999	1	Heifer19dec_RD3_01_402.08086.08086.2	2020-11-01	GQMPGPNHIPMQG	A5D7A1	1248.57
0.999999	1	Heifer19dec_RD3_01_402.08091.08091.2	2020-09-01	SASLEQQNGGSAS	F1MRA1	1060.48
0.999999	1	Heifer19dec_RD3_01_402.08109.08109.2	2024-11-01	FGHIAKAEGDTRFLV	Q3MHK0	1413.74
0.999999	1	Heifer19dec_RD3_01_402.08154.08154.3	19/68	MSHKKVGALWREADLSWKDF	F1MIK1	2125.11
0.999999	1	Heifer19dec_RD3_01_402.08215.08215.3	1948-11-01	FDFDDEPTTPKDSLL	Q1LZ80	1478.64
0.999999	1	Heifer19dec_RD3_01_402.08229.08229.3	21/72	SSLLGSPMYFFLANLSFIDAC	M0QW42	2121.05
0.999999	1	Heifer19dec_RD3_01_402.08235.08235.2	2020-11-01	AGGGVDEGSLLCA	E1BFP0	1062.47
0.999999	1	Heifer19dec_RD3_01_402.08253.08253.3	16/68	PAPTPLGPPGLTNGLLSGDE	A1XG22	1675.88
0.999999	1	Heifer19dec_RD3_01_402.08302.08302.3	18/64	EPRSQEVCGPVEERARERE	G3MXG4	2054.01
0.999999	1	Heifer19dec_RD3_01_402.08305.08305.3	16/48	VIDVGQRFLVNRVQD	Q28901	1542.86
0.999999	1	Heifer19dec_RD3_01_402.08311.08311.2	2020-09-01	PHVMLLAKTKMRL	E1BPJ0	1326.76
0.999999	1	Heifer19dec_RD3_01_402.08366.08366.2	2014-07-01	CSHQRCHGHG	L8IRK4	1017.43
0.999999	1	Heifer19dec_RD3_01_402.08413.08413.3	23/80	GWTAEAIAEGAQSLGLSSAAASM	Q2NL34	1989.96
0.999999	1	Heifer19dec_RD3_01_402.08435.08435.2	2014-09-01	TCSSAASNNL	L8IQU6	809.297
0.999999	1	Heifer19dec_RD3_01_402.08451.08451.2	2014-07-01	QHEGYEVLKF	L8HXN1	973.487
0.999999	1	Heifer19dec_RD3_01_402.08463.08463.2	2022-11-01	DFELSGSGDLDDSE	G3MYP1	1240.51
0.999999	1	Heifer19dec_RD3_01_402.08468.08468.3	19/60	GKQQTVMAIATKIALQMN	L8IZQ3	1789.98
0.999999	1	Heifer19dec_RD3_01_402.08513.08513.3	20/72	SDYLSSNGSFPLEQLKSFPQL	A6QPS5	2156.04
0.999999	1	Heifer19dec_RD3_01_402.08517.08517.2	2020-08-01	DMEEGLITSGDSF	A8E646	1153.48
0.999999	1	Heifer19dec_RD3_01_402.08539.08539.3	19/56	LPVTVHSPSVRAMRSAL	F1MKW8	1593.84
0.999999	1	Heifer19dec_RD3_01_402.08540.08540.2	2022-09-01	KADMTASGSPDYGQ	Q29RS8	1186.44
0.999999	1	Heifer19dec_RD3_01_402.08635.08635.2	2026-10-01	LYPVPDSRFPFLGVHF	A7MBI3	1629.83
0.999999	1	Heifer19dec_RD3_01_402.08647.08647.3	19/56	GKHSSHEVKALGAMWKL	Q29RQ5	1723.88
0.999999	1	Heifer19dec_RD3_01_402.08699.08699.2	2022-09-01	ATGSPKPTIHWSKL	F1MER7	1337.71
0.999999	1	Heifer19dec_RD3_01_402.08716.08716.3	20/56	VPLNPGGPVSCSDTRHP	G3X6E6	1592.74
0.999999	1	Heifer19dec_RD3_01_402.08755.08755.3	16/48	ATAVGMNMLTKRAPP	Q5EA43	1404.72
0.999999	1	Heifer19dec_RD3_01_402.08763.08763.2	2028-10-01	PASGKKAKAESSSSCSS	Q0IIG0	1483.69
0.999999	1	Heifer19dec_RD3_01_402.08779.08779.2	2018-10-01	AASPPSSPAPAS	E1B8J9	880.429
0.999999	1	Heifer19dec_RD3_01_402.08800.08800.3	20/76	AYFSQPMVATAVIVHLVTDGTY	L8IAG6	2164.09
0.999999	1	Heifer19dec_RD3_01_402.08820.08820.3	20/80	DRNPSPPPPSRDEDEEAAAGGDC	E1BD67	2162.95
0.999999	1	Heifer19dec_RD3_01_402.08821.08821.3	18/56	YSVDYSKFGNTIKVPTP	A2VDS4	1654.86
0.999999	1	Heifer19dec_RD3_01_402.08865.08865.2	2024-10-01	RILQDAVGKLDDPLH	F1MUI0	1395.76
0.999999	1	Heifer19dec_RD3_01_402.08909.08909.2	2016-08-01	GLVLAAGACYC	E1B717	936.474
0.999999	1	Heifer19dec_RD3_01_402.08929.08929.3	13/56	SQSAASPPAASSVLASG	L8IV82	1342.67
0.999999	1	Heifer19dec_RD3_01_402.08931.08931.3	13/48	KKMLVKAVCTETGAN	F1MVL0	1406.73
0.999999	1	Heifer19dec_RD3_01_402.08980.08980.3	19/64	QKSDLIVHQIVHTGEKPYK	F1MHE2	1963.05
0.999999	1	Heifer19dec_RD3_01_402.09017.09017.3	20/60	CRDSQPGILPTEHGTLFG	A5PK27	1766.9
0.999999	1	Heifer19dec_RD3_01_402.09048.09048.2	2026-08-01	-MLLYRGAPAGPGAPG	G3MY05	1385.71
0.999999	1	Heifer19dec_RD3_01_402.09050.09050.3	20/84	SAIGCLGMFCLLNLMSMTGVSFGC	Q5E9E8	2410.09
0.999999	1	Heifer19dec_RD3_01_402.09087.09087.2	2022-11-01	FFSTLGSLTVGAKG	L8I8W2	1179.65
0.999999	1	Heifer19dec_RD3_01_402.09245.09245.3	14/52	GEKASSNVGLDWKGDF	E1BKZ0	1504.72
0.999999	1	Heifer19dec_RD3_01_402.09250.09250.3	16/56	VAELARPLSFSPLVLPL	F1MTU4	1608.92
0.999999	1	Heifer19dec_RD3_01_402.09271.09271.3	21/72	KNTLGAAFLTSPIFYGRPIAL	Q17QW0	2008.08
0.999999	1	Heifer19dec_RD3_01_402.09334.09334.3	25/80	AGGSMLSAGPSAPLGGSPRSSAR	E1BMR6	1858.88
0.999999	1	Heifer19dec_RD3_01_402.09403.09403.2	2026-12-01	STHSSDQGKLAVAKSL	A3KN31	1427.74
0.999999	1	Heifer19dec_RD3_01_402.09442.09442.3	17/60	SSAGSSGSFEYIPADPLD	G3N054	1596.73
0.999999	1	Heifer19dec_RD3_01_402.09450.09450.2	2014-08-01	LMLADNGVCC	Q2KIZ8	894.357
0.999999	1	Heifer19dec_RD3_01_402.09459.09459.2	2018-07-01	DENLLRNAEYEA	F1MCG9	1249.59
0.999999	1	Heifer19dec_RD3_01_402.09465.09465.3	16/80	RASVPPVPGKPRQVLPPGASHFT	F1MB71	2137.18
0.999999	1	Heifer19dec_RD3_01_402.09504.09504.2	2028-11-01	LSLVCEAVPGAKGATRR	Q0IIE2	1514.79
0.999999	1	Heifer19dec_RD3_01_402.09526.09526.3	18/68	LVKVVERELISKHMKTIVEM	L8IG39	2137.23
0.999999	1	Heifer19dec_RD3_01_402.09550.09550.2	2016-09-01	QYMPVSCTGSQ	L8IIR5	1016.39
0.999999	1	Heifer19dec_RD3_01_402.09568.09568.3	20/80	GTGGYGGGGGYGGRGGYSGGGYG	Q28141	1812.75
0.999999	1	Heifer19dec_RD3_01_402.09601.09601.2	2020-09-01	LPRSAVLLRLPQS	F1MPE1	1248.77
0.999999	1	Heifer19dec_RD3_01_402.09659.09659.3	15/64	MTMQFISHRFPEDHDPTIE	G3MXR6	2085.96
0.999999	1	Heifer19dec_RD3_01_402.09716.09716.2	2026-11-01	ARVPHAVVCIVGTHAD	F1N7Y7	1514.81
0.999999	1	Heifer19dec_RD3_01_402.09734.09734.3	16/60	SPGAGPEVATLERPAPAG	Q2NKZ7	1531.8
0.999999	1	Heifer19dec_RD3_01_402.09765.09765.2	2026-09-01	RGRGAGGGRRRAGNPP	F1N1K4	1337.71
0.999999	1	Heifer19dec_RD3_01_402.09766.09766.2	2016-07-01	KDDPGKGSYWA	E1BK17	1023.43
0.999999	1	Heifer19dec_RD3_01_402.09796.09796.2	1930-10-01	ALPDSDSGEPDVPPALPD	F1MR50	1604.76
0.999999	1	Heifer19dec_RD3_01_402.09832.09832.2	13/24	LTGPLNLNDPEAKCR	Q0VD30	1427.67
0.999999	1	Heifer19dec_RD3_01_402.09846.09846.2	2014-07-01	LMAAMGNTDH	A7MBF6	809.305
0.999999	1	Heifer19dec_RD3_01_402.10044.10044.2	2020-09-01	LGLSQDPHTQVLL	L8HLA4	1193.6
0.999999	1	Heifer19dec_RD3_01_402.10064.10064.3	17/80	TTVAPGSSNTESTTSLGESRTRL	P98091	2137.02
0.999999	1	Heifer19dec_RD3_01_402.10068.10068.3	16/60	NASSDSEYKVSFPSCLNQ	E1B9T6	1789.78
0.999999	1	Heifer19dec_RD3_01_402.10109.10109.3	16/80	QMAIPLGLASPARSENSSLSSTA	L8HXA5	2088.05
0.999999	1	Heifer19dec_RD3_01_402.10135.10135.2	2020-09-01	SSASMSGGAGRCS	A4IFP2	1039.42
0.999999	1	Heifer19dec_RD3_01_402.10138.10138.2	2022-08-01	GYGDVGKGCAQALR	Q3MHL4	1237.58
0.999999	1	Heifer19dec_RD3_01_402.10158.10158.2	2024-10-01	LFLDSSTSMFVNARA	L8HZ99	1473.69
0.999999	1	Heifer19dec_RD3_01_402.10162.10162.3	18/56	QVYCHKGFGKDMALYSL	A6QLU2	1790.81
0.999999	1	Heifer19dec_RD3_01_402.10214.10214.2	2014-06-01	VATATGQEEA	A5D7H6	805.345
0.999999	1	Heifer19dec_RD3_01_402.10236.10236.2	2018-07-01	VPVAPEMTGQGS	L8I878	985.454
0.999999	1	Heifer19dec_RD3_01_402.10382.10382.3	20/80	KGAEMFSQSMDGFLSSVADMVQS	Q1RMW4	2251.94
0.999999	1	Heifer19dec_RD3_01_402.10397.10397.3	15/48	VQALKAMGYFLKHLA	L8I7R8	1534.83
0.999999	1	Heifer19dec_RD3_01_402.10401.10401.2	2022-09-01	GPMPLHGMRGPPPD	F1MN26	1301.64
0.999999	1	Heifer19dec_RD3_01_402.10492.10492.3	19/76	YPKARQGAGSSGEAAGPPGWQG	L8J131	1907.92
0.999999	1	Heifer19dec_RD3_01_402.10559.10559.3	14/68	DVIQQASLEDMITGNQAASA	E1BIF0	1874.9
0.999999	1	Heifer19dec_RD3_01_402.10583.10583.3	16/64	PHSRTWIDADFVGHYSITL	E1BL82	2003.95
0.999999	1	Heifer19dec_RD3_01_402.10629.10629.2	2020-08-01	QQQPSIPPPSGPE	L8IK16	1103.56
0.999999	1	Heifer19dec_RD3_01_402.10663.10663.3	17/96	TLRRSMSTEGNKRGMIQLIVARRISKC	L8HXH0	2931.63
0.999999	1	Heifer19dec_RD3_01_402.10710.10710.2	2014-07-01	RLIGSAHART	E1BFQ0	823.466
0.999999	1	Heifer19dec_RD3_01_402.10734.10734.3	19/68	SASQLLKIYVLVQFALMLAF	E1B9D5	2036.17
0.999999	1	Heifer19dec_RD3_01_402.10760.10760.2	2020-08-01	PLVFDMAYDDHMK	Q2KI45	1355.55
0.999999	1	Heifer19dec_RD3_01_402.10849.10849.3	13/64	KPQQLSENSLDSLHRMWSP	A5D7B4	2042.95
0.999999	1	Heifer19dec_RD3_01_402.10867.10867.2	2022-09-01	CVANHMRTVENMLH	G3MX83	1445.68
0.999999	1	Heifer19dec_RD3_01_402.10887.10887.2	2024-09-01	SFSPAESSGAQGDSA	L8HMS9	1238.51
0.999999	1	Heifer19dec_RD3_01_402.10889.10889.3	13/48	ECFQKSEARKRVYQL	F1N7H1	1698.86
0.999999	1	Heifer19dec_RD3_01_402.10897.10897.3	1968-11-01	AAGAGGSRLLVGATYTGYGS	F1N4C5	1669.84
0.999999	1	Heifer19dec_RD3_01_402.11003.11003.2	2022-10-01	TPVVSKASAGAMEV	A1L561	1161.57
0.999999	1	Heifer19dec_RD3_01_402.11070.11070.3	15/48	VRLVKNGTSQCEGQV	H9BDV2	1475.72
0.999999	1	Heifer19dec_RD3_01_402.11113.11113.3	18/64	REREQEQKKANSLARLAHT	L8IUG2	2007.06
0.999999	1	Heifer19dec_RD3_01_402.11150.11150.3	1960-09-01	GSTRGKPGCRRALDLCQC	F1MPD5	1873.94
0.999999	1	Heifer19dec_RD3_01_402.11200.11200.3	19/60	QRQARKERLSGLFLNEEV	L8IBN1	1945.05
0.999999	1	Heifer19dec_RD3_01_402.11235.11235.3	13/60	ESTNMIEGILYEMRVFAA	E1BNV1	1872.91
0.999999	1	Heifer19dec_RD3_01_402.11292.11292.2	2020-07-01	VAANSGFMSMGTF	G3N226	1072.43
0.999999	1	Heifer19dec_RD3_01_402.11350.11350.2	2028-11-01	SDELADVGGALRGLNLS	A5PJQ2	1511.79
0.999999	1	Heifer19dec_RD3_01_402.11368.11368.2	2018-07-01	AERPGDLPEPPL	E1BCY1	1105.54
0.999999	1	Heifer19dec_RD3_01_402.11399.11399.2	2018-08-01	PRHCGIDSEMQQ	Q1JP69	1247.5
0.999999	1	Heifer19dec_RD3_01_402.11422.11422.2	1932-11-01	LSIVSMENIGEQVVCLIAY	F1MPF2	1860.93
0.999999	1	Heifer19dec_RD3_01_402.11430.11430.2	2016-08-01	QWLPRLHALVV	E1BNQ4	1103.66
0.999999	1	Heifer19dec_RD3_01_402.11442.11442.2	2028-10-01	GPGGRAGGGGGGPGGPP	E1BIT8	1106.52
0.999999	1	Heifer19dec_RD3_01_402.11481.11481.2	2014-06-01	SVARPSTTIH	E1BNS4	843.481
0.999999	1	Heifer19dec_RD3_01_402.11519.11519.2	2020-08-01	SASPPRLRDKLSP	L8J3Y7	1238.71
0.999999	1	Heifer19dec_RD3_01_402.11539.11539.3	1944-10-01	RGLMMSVMLASLMS	F1MGW2	1298.61
0.999999	1	Heifer19dec_RD3_01_402.11586.11586.2	2022-09-01	KPRTMPMDTSVYES	E1BMP9	1425.63
0.999999	1	Heifer19dec_RD3_01_402.11711.11711.3	18/64	SRFDEEDLGDEMACVHAL-	E1B9S9	2005.85
0.999999	1	Heifer19dec_RD3_01_402.11743.11743.3	13/68	FRSPAPQKGLGVMPKHGLDV	L8IPZ8	1903.01
0.999999	1	Heifer19dec_RD3_01_402.11797.11797.3	14/56	MPMIPQAMYAMLACARL	A7MB45	1754.8
0.999999	1	Heifer19dec_RD3_01_402.11845.11845.2	2018-07-01	SQSGFTVSGMLE	L8ITA5	1041.48
0.999999	1	Heifer19dec_RD3_01_402.11886.11886.2	2028-12-01	PTRGGDAEAAEAEHTVS	Q17QE3	1512.68
0.999999	1	Heifer19dec_RD3_01_402.11898.11898.2	2014-07-01	CDPQQGTHRL	F1MXM0	937.437
0.999999	1	Heifer19dec_RD3_01_402.11907.11907.2	1930-11-01	TPENSSSPGMMDMHDDNS	G3N375	1810.61
0.999999	1	Heifer19dec_RD3_01_402.11926.11926.2	2018-08-01	TGTQDPGLLVPK	L8I6F3	995.529
0.999999	1	Heifer19dec_RD3_01_402.11929.11929.3	21/96	LPNGQTVQVHGVIQAAQPSVIQSPQVQ	P27925	2581.36
0.999999	1	Heifer19dec_RD3_01_402.11930.11930.2	1930-11-01	LPFLPGTSPSADGPDSFS	F1MUS9	1590.72
0.999999	1	Heifer19dec_RD3_01_402.11951.11951.3	1940-12-01	NVDHVERYDTITN	F1MN31	1346.65
0.999999	1	Heifer19dec_RD3_01_402.11955.11955.2	2026-11-01	GLPTSASFTLDDDVFA	E1BEG4	1526.71
0.999999	1	Heifer19dec_RD3_01_402.11980.11980.3	16/56	SDTGSDVGLSDSSPSPK	Q2KJH5	1419.6
0.999999	1	Heifer19dec_RD3_01_402.12006.12006.3	17/80	GSAGSAGGGGGGGPGGGGGGYTY	E1BPK8	1493.61
0.999999	1	Heifer19dec_RD3_01_402.12008.12008.2	2016-09-01	CPGLAPTGEME	A6H6Y6	871.411
0.999999	1	Heifer19dec_RD3_01_402.12012.12012.3	22/64	MDDLFNQLMGGMNGVNSEN	Q28076	1855.77
0.999999	1	Heifer19dec_RD3_01_402.12044.12044.2	2022-08-01	LLPRLPSEPGMTLL	L8I5K1	1325.7
0.999999	1	Heifer19dec_RD3_01_402.12052.12052.2	2016-09-01	ARPSALPRRVP	F1MK94	1050.64
0.999999	1	Heifer19dec_RD3_01_402.12055.12055.2	2020-10-01	HYGQSEGQDRDSH	E1B971	1240.5
0.999999	1	Heifer19dec_RD3_01_402.12075.12075.2	2020-10-01	PPPPAQEFQTARL	L8IM42	1240.62
0.999999	1	Heifer19dec_RD3_01_402.12219.12219.3	17/56	CGASLISDRYLLTAAHC	F1N633	1586.84
0.999999	1	Heifer19dec_RD3_01_402.12220.12220.3	14/44	TMTTGEALNNNTGA	F1MHZ3	1237.52
0.999999	1	Heifer19dec_RD3_01_402.12272.12272.2	2016-08-01	GGRSSEPPPME	Q5EA32	972.433
0.999999	1	Heifer19dec_RD3_01_402.12274.12274.3	17/52	ERMKVINTGIKVWCRN	F1MK61	1759.97
0.999999	1	Heifer19dec_RD3_01_402.12278.12278.2	2016-09-01	RHGEDNGHLQL	A6QR43	1005.43
0.999999	1	Heifer19dec_RD3_01_402.12328.12328.2	2016-10-01	HTSHLLPAARS	Q2HJ32	964.545
0.999999	1	Heifer19dec_RD3_01_402.12352.12352.3	15/60	GLKGPPGMHGPPGPVGLP	A7E303	1509.81
0.999999	1	Heifer19dec_RD3_01_402.12364.12364.3	21/56	LRYSVIGGSSVAGTTRK	F1MCA8	1509.79
0.999999	1	Heifer19dec_RD3_01_402.12386.12386.2	2014-07-01	LCLVLTIFAN	A5PK70	935.515
0.999999	1	Heifer19dec_RD3_01_402.12403.12403.3	21/84	EEVSAQEAAESPVVQFQSLETHSE	Q0IIK3	2372.11
0.999999	1	Heifer19dec_RD3_01_402.12424.12424.1	2019-12-07	SPAFQDHPL	A6QLA8	810.366
0.999999	1	Heifer19dec_RD3_01_402.12438.12438.3	13/48	QMLQGPVMPGYTHQR	L8I6E2	1457.68
0.999999	1	Heifer19dec_RD3_01_402.12576.12576.2	2022-10-01	TLRLDLTGASSTNV	F1MJ70	1246.65
0.999999	1	Heifer19dec_RD3_01_402.12619.12619.3	25/104	FAEPGGGGGGGGGGPGGSASGPGGSGGGK	A6QLB8	1867.77
0.999999	1	Heifer19dec_RD3_01_402.12641.12641.2	2026-09-01	QYPFKVPGPPGTPFVT	F1N757	1501.8
0.999999	1	Heifer19dec_RD3_01_402.12651.12651.2	2018-09-01	QAPGANDLPPRG	F1N1K6	1006.52
0.999999	1	Heifer19dec_RD3_01_402.12657.12657.3	15/60	EAMLEAPYKKDENKLSSA	F6QIA5	1822.91
0.999999	1	Heifer19dec_RD3_01_402.12660.12660.3	17/56	NMSANMEIIYLIRGPGV	L8HMW6	1663.84
0.999999	1	Heifer19dec_RD3_01_402.12664.12664.3	19/60	PACQEITVPMCRGIGYNL	F1MGM1	1867.84
0.999999	1	Heifer19dec_RD3_01_402.12670.12670.3	17/48	CMGNSFGVSPTMDKE	Q9Y4G8	1385.6
0.999999	1	Heifer19dec_RD3_01_402.12681.12681.1	2014-09-01	PPHLPGPPPG	Q0P5D2	810.439
0.999999	1	Heifer19dec_RD3_01_402.12688.12688.3	19/76	LHFCSREMDPVCATNGKTYSNK	Q0VBW4	2372.99
0.999999	1	Heifer19dec_RD3_01_402.12708.12708.2	2020-08-01	VLERALLAPGLGN	L8IR24	1108.66
0.999999	1	Heifer19dec_RD3_01_402.12743.12743.2	2018-10-01	LPGKKVTTEDVE	A5D7R1	1072.58
0.999999	1	Heifer19dec_RD3_01_402.12750.12750.3	19/60	NETMIPVLTSKKASELPV	P57709	1758.94
0.999999	1	Heifer19dec_RD3_01_402.12807.12807.3	19/52	VIESATICHLRPVRLP	E1BLB1	1663.92
0.999999	1	Heifer19dec_RD3_01_402.12815.12815.1	2016-10-01	DGILALGLGVH	O95398	811.517
0.999999	1	Heifer19dec_RD3_01_402.12853.12853.3	18/80	VIIESMTNVPPVNEETVIFKTDR	Q1RMQ2	2375.19
0.999999	1	Heifer19dec_RD3_01_402.12861.12861.3	15/36	WYFTTTYNVVKP	P10123	1234.62
0.999999	1	Heifer19dec_RD3_01_402.12894.12894.2	2018-10-01	SPNNGPGPEPSG	L8HYW3	964.425
0.999999	1	Heifer19dec_RD3_01_402.12916.12916.2	2028-09-01	LVGQAASCMTSCTGSAD	M5FMV8	1502.58
0.999999	1	Heifer19dec_RD3_01_402.12940.12940.2	2020-10-01	HPGPGMPGTTPFS	G3X7P3	1073.49
0.999999	1	Heifer19dec_RD3_01_402.12945.12945.2	2022-11-01	AMAYDWFVSIHHPL	L8IK06	1501.68
0.999999	1	Heifer19dec_RD3_01_402.12994.12994.3	25/84	LTGQPGEEPTLMSPGTSCGSLTER	F1MXF5	2250.96
0.999999	1	Heifer19dec_RD3_01_402.13041.13041.3	20/76	WTKDKYMASRGQKAKSMEGFQD	F1N2X1	2306.11
0.999999	1	Heifer19dec_RD3_01_402.13079.13079.3	20/52	RKRGALHPQVIMFPCP	L8IDJ5	1668.86
0.999999	1	Heifer19dec_RD3_01_402.13082.13082.3	13/40	WDHVYLQGREDRG	A6H734	1386.66
0.999999	1	Heifer19dec_RD3_01_402.13110.13110.3	17/56	LLNQLQRGVLLASNSRG	F1MU14	1667.94
0.999999	1	Heifer19dec_RD3_01_402.13143.13143.3	23/96	GTRAAAGGAPMKMEPGRPASPAGGPGP	F1MMB2	2307.12
0.999999	1	Heifer19dec_RD3_01_402.13156.13156.3	16/52	LCAPPARPTPSAPPAP	F1MPZ6	1388.69
0.999999	1	Heifer19dec_RD3_01_402.13173.13173.2	2018-10-01	GRPLPSPSYGHP	F1MM81	1109.56
0.999999	1	Heifer19dec_RD3_01_402.13238.13238.2	2020-09-01	GGSGGGPGPGPSP	E1BAG4	825.362
0.999999	1	Heifer19dec_RD3_01_402.13244.13244.3	16/44	HNVNITSKRNQGRE	A0A0H3V687	1385.75
0.999999	1	Heifer19dec_RD3_01_402.13265.13265.2	2018-09-01	SRVHAGSKAALA	Q3T005	1008.58
0.999999	1	Heifer19dec_RD3_01_402.13280.13280.2	2014-08-01	RSGAEKGYLV	Q08DI8	823.408
0.999999	1	Heifer19dec_RD3_01_402.13322.13322.2	2020-09-01	YVPPPPLAASASE	E1BAG4	1005.55
0.999999	1	Heifer19dec_RD3_01_402.13351.13351.2	2026-11-01	LQDLFPTIASGCSWTL	E1B9M5	1581.71
0.999999	1	Heifer19dec_RD3_01_402.13452.13452.3	18/60	QGAGMQGASIQGGGQPGG	Q8HXM1	1387.62
0.999999	1	Heifer19dec_RD3_01_402.13458.13458.2	2016-08-01	SMTDVIVQHLL	A5D9G5	1070.54
0.999999	1	Heifer19dec_RD3_01_402.13481.13481.2	1930-10-01	VPGSSDGIIGQTHIDLDA	E1BG78	1623.77
0.999999	1	Heifer19dec_RD3_01_402.13506.13506.2	2014-09-01	SYLPLAHMFE	Q1LZF6	1006.49
0.999999	1	Heifer19dec_RD3_01_402.13583.13583.3	25/96	FADFGSAAASGNFPSQVTATSGNGDFG	A7Z035	2375.03
0.999999	1	Heifer19dec_RD3_01_402.13679.13679.2	2018-06-01	RGLAVAGGGESS	Q8WMX8	816.398
0.999999	1	Heifer19dec_RD3_01_402.13696.13696.3	1944-12-01	QGPEEFVEGMALGL	F1MM35	1234.55
0.999999	1	Heifer19dec_RD3_01_402.13700.13700.2	13/26	RNICAPRDPGPRGPEG	F1N1P8	1534.73
0.999999	1	Heifer19dec_RD3_01_402.13729.13729.3	18/104	GPKGELGPVGNPGPAGPAGPRGEVGLPGL	P02465	2433.28
0.999999	1	Heifer19dec_RD3_01_402.13823.13823.3	15/44	LSPMEIGLFISYDN	E1BGM5	1386.64
0.999999	1	Heifer19dec_RD3_01_402.13850.13850.2	2019-12-07	AAMNPCMSP	L8I687	825.282
0.999999	1	Heifer19dec_RD3_01_402.13853.13853.3	1948-10-01	LASTTAAMSNTPGTP	F1MYK6	1224.53
0.999999	1	Heifer19dec_RD3_01_407.00008.00008.2	2016-07-01	RGSSPSSCGSS	E1BLF5	824.297
0.999999	1	Heifer19dec_RD3_01_407.00026.00026.2	2018-09-01	GMGHLWRKVHTV	Q2T9W2	1279.66
0.999999	1	Heifer19dec_RD3_01_407.00050.00050.2	2020-09-01	TFPEAEDSLLQQM	Q1RMW4	1275.6
0.999999	1	Heifer19dec_RD3_01_407.00139.00139.3	17/48	LPNLSSPSTEGPPGP	Q5BIP4	1238.58
0.999999	1	Heifer19dec_RD3_01_407.00158.00158.3	1944-12-01	NHHSNEVGAASETH	G3X6P3	1237.53
0.999999	1	Heifer19dec_RD3_01_407.00172.00172.3	1944-10-01	HPGSLVEKLPDSPA	Q58CP9	1237.66
0.999999	1	Heifer19dec_RD3_01_407.00188.00188.2	2022-09-01	TGGYMVMGDSFNTS	A2VDL8	1277.51
0.999999	1	Heifer19dec_RD3_01_407.00295.00295.2	2018-07-01	LYKTVMSHSFYP	F1MV72	1277.58
0.999999	1	Heifer19dec_RD3_01_407.00313.00313.3	14/64	MSNSREDMSLSTQGNYINL	L8HSH6	1914.84
0.999999	1	Heifer19dec_RD3_01_407.00456.00456.3	17/68	LGLIATALFGYDASITCPMR	L8IF24	1915.91
0.999999	1	Heifer19dec_RD3_01_407.00462.00462.3	1944-10-01	SSQHAARGGHSDDD	E1BMC4	1236.52
0.999999	1	Heifer19dec_RD3_01_407.00737.00737.3	1940-11-01	DEQRLSADSGYIL	F1MX49	1237.59
0.999999	1	Heifer19dec_RD3_01_407.00799.00799.3	1940-10-01	WKHFDADGNGYIE	Q3ZBY3	1235.56
0.999999	1	Heifer19dec_RD3_01_407.00806.00806.3	13/40	DCNVILGSAQEFL	E1BP86	1236.58
0.999999	1	Heifer19dec_RD3_01_407.00856.00856.3	13/32	QTLDCLHYWKV	A6QPT0	1234.58
0.999999	1	Heifer19dec_RD3_01_407.01016.01016.3	1948-10-01	QPVTMGAVPAPQAPP	E1BAF6	1234.64
0.999999	1	Heifer19dec_RD3_01_407.01022.01022.2	2014-10-01	ACGPPVAPEC	L8ICK6	825.369
0.999999	1	Heifer19dec_RD3_01_407.01126.01126.3	15/64	YGQQMFTSQNAPAVRPIRD	L8IKJ1	1915.97
0.999999	1	Heifer19dec_RD3_01_407.01263.01263.2	2014-08-01	SAVWGPLGEC	Q5E966	827.418
0.999999	1	Heifer19dec_RD3_01_407.01265.01265.3	1940-09-01	AAIKTLMDTIESV	E1BK38	1236.63
0.999999	1	Heifer19dec_RD3_01_407.01331.01331.3	17/48	ESTVSVSGNLSSNSF	Q95KY9	1237.58
0.999999	1	Heifer19dec_RD3_01_407.01483.01483.3	1944-09-01	AAMAVDKSNSTSKH	Q32LB3	1237.6
0.999999	1	Heifer19dec_RD3_01_407.01523.01523.3	1936-10-01	MQFEKDNLITKQ	F1MXF5	1234.66
0.999999	1	Heifer_1_Az1_22dec18_RD1_01_440.00172.00172.3	13/40	PPIFGQPTYNTTL	L8IR07	1237.6
0.999999	1	Heifer_1_Az1_22dec18_RD1_01_440.00363.00363.3	21/48	GGPALLPAEGAVFLT	G5E5Q8	1253.7
0.999999	1	Heifer_1_Az1_22dec18_RD1_01_440.00369.00369.2	2019-12-08	LTLWMAGWY	Q2KJG4	863.4
0.999999	1	Heifer_1_Az1_22dec18_RD1_01_440.00394.00394.3	15/48	LLLQYVVKSFDRSTK	F1N6X2	1554.84
0.999999	1	Heifer_1_Az1_22dec18_RD1_01_440.00406.00406.2	2014-06-01	VLLRTTLDLL	E1B8Z0	943.57
0.999999	1	Heifer_1_Az1_22dec18_RD1_01_440.00444.00444.2	2022-08-01	RRDVRLVDAGGVKV	L8HTR5	1283.73
0.999999	1	Heifer_1_Az1_22dec18_RD1_01_440.00446.00446.1	2019-10-07	TTDTSVHG	F1N0A6	658.292
0.999999	1	Heifer_1_Az1_22dec18_RD1_01_440.00500.00500.3	13/40	DYGTCTDALGYQS	G3MYG2	1247.51
0.999999	1	Heifer_1_Az1_22dec18_RD1_01_440.00512.00512.3	22/60	KLYQVMETKSMLYLVTEY	F1MKW8	1962.97
0.999999	1	Heifer_1_Az1_22dec18_RD1_01_440.00520.00520.3	22/72	SLPAAAPPPPPPPPKAELAEQ	E1BD77	1859.02
0.999999	1	Heifer_1_Az1_22dec18_RD1_01_440.00528.00528.2	13/20	RRLARLAGGQTSQ	A6QNS2	1128.64
0.999999	1	Heifer_1_Az1_22dec18_RD1_01_440.00529.00529.3	15/44	SGELYPGEMVPIDF	L8J028	1318.61
0.999999	1	Heifer_1_Az1_22dec18_RD1_01_440.00547.00547.2	1934-08-01	WVPMGPAERAGPAATPCLGT	F1MGR0	1750.85
0.999999	1	Heifer_1_Az1_22dec18_RD1_01_440.00549.00549.2	1936-06-01	TPSSGQFSSSPIQDSAKRYSL	F1N3C9	2027.95
0.999999	1	Heifer_1_Az1_22dec18_RD1_01_440.00553.00553.2	2024-12-01	QASQSLNRMDSGQQG	L8J1J2	1436.63
0.999999	1	Heifer_1_Az1_22dec18_RD1_01_440.00568.00568.3	15/104	RYIVSQLGLTRDPLEEMAQLSSYDSPDTP	E1B754	3043.43
0.999999	1	Heifer_1_Az1_22dec18_RD1_01_440.00572.00572.3	24/64	KSEATFSEEETESPNVKAQ	E1BM39	1853.82
0.999999	1	Heifer_1_Az1_22dec18_RD1_01_440.00577.00577.1	2026-12-01	PMAPSSMASHHHHHPH	L8HPH7	1562.66
0.999999	1	Heifer_1_Az1_22dec18_RD1_01_440.00592.00592.3	20/52	TTTSTNYLAKAMVSQL	E1B7L7	1529.74
0.999999	1	Heifer_1_Az1_22dec18_RD1_01_440.00599.00599.3	19/88	DFPGVYTRVTSYMSWIRQYVPLSPG	G3MXR7	2762.39
0.999999	1	Heifer_1_Az1_22dec18_RD1_01_440.00604.00604.2	1938-12-01	LPPAVVKPLIVATEATSNVLGG	E1BH30	1975.14
0.999999	1	Heifer_1_Az1_22dec18_RD1_01_440.00623.00623.3	18/48	GSMHASSHRGHQPWL	G3N3X7	1516.67
0.999999	1	Heifer_1_Az1_22dec18_RD1_01_440.00641.00641.3	17/52	FTSKDFTLLIEAAQPQ	L8I2W1	1532.81
0.999999	1	Heifer_1_Az1_22dec18_RD1_01_440.00666.00666.3	22/100	SSLLGGGVLQGSFTVMGVISGPLLGAFL	F1MT46	2476.34
0.999999	1	Heifer_1_Az1_22dec18_RD1_01_440.00671.00671.3	17/48	HTSGTLRGPNPRMLR	F1N1E0	1398.74
0.999999	1	Heifer_1_Az1_22dec18_RD1_01_440.01261.01261.3	1944-10-01	SVVSQLTDDGFSAL	L8INP0	1237.58
0.999999	1	Heifer_1_Az1_22dec18_RD1_01_440.02318.02318.3	14/48	APTGRAPSTMTGSGV	Q3T904	1234.56
0.999999	1	Heifer_1_Az1_22dec18_RD1_01_440.02359.02359.3	1936-10-01	LYSTGRMEKHLD	F1MC39	1236.59
0.999999	1	Heifer_1_Az1_22dec18_RD1_01_440.02393.02393.3	1944-11-01	PCHGGDMSQNSGSE	L8IDR3	1235.43
0.999999	1	Heifer_1_Az1_22dec18_RD1_01_440.02397.02397.3	20/52	AMAPPSAVGSPAAAPR	Q3ZCI0	1238.6
0.999999	1	Heifer_1_Az1_22dec18_RD1_01_440.02523.02523.2	2016-07-01	LPESGAPSSEP	F1MTG3	859.356
0.999999	1	Heifer_1_Az1_22dec18_RD1_01_440.02598.02598.3	1952-12-01	YGASPDIDTGTGPTPT	Q9GLE5	1284.58
0.999999	1	Heifer_1_Az1_22dec18_RD1_01_440.02661.02661.3	18/52	RAESPSQGKPGEAGAE	E1BM58	1284.59
0.999999	1	Heifer_1_Az1_22dec18_RD1_01_440.02691.02691.3	18/80	LLAVNSDSHLHTPMYFFLSNLSF	G3N2E1	2408.15
0.999999	1	Heifer_1_Az1_22dec18_RD1_01_440.02804.02804.2	2018-10-01	AAEVAGGPGVTG	E1BQ05	856.429
0.999999	1	Heifer_1_Az1_22dec18_RD1_01_440.02810.02810.2	2014-07-01	VTPKLRLGPG	E1BBL5	880.549
0.999999	1	Heifer_1_Az1_22dec18_RD1_01_440.02859.02859.2	2016-07-01	LGRGTATFDGL	A0A1B3NQ06	880.404
0.999999	1	Heifer_1_Az1_22dec18_RD1_01_440.02878.02878.3	15/52	LVVLGVGSTLGVGVYL	G3X6R9	1318.75
0.999999	1	Heifer_1_Az1_22dec18_RD1_01_440.02923.02923.3	21/88	LGLLVIANSGLMGLVTFVVLLISYA	F1MSZ3	2407.38
0.999999	1	Heifer_1_Az1_22dec18_RD1_01_440.02934.02934.2	2016-07-01	DKNGLMYFVDA	F1MEX4	1085.52
0.999999	1	Heifer_1_Az1_22dec18_RD1_01_440.02960.02960.2	2026-11-01	VTVHSFGWSDRAKSQT	A4FV11	1604.77
0.999999	1	Heifer_1_Az1_22dec18_RD1_01_440.02986.02986.3	20/64	PGRIGISGDSAGGNLAAAV	Q0P5B7	1485.75
0.999999	1	Heifer_1_Az1_22dec18_RD1_01_440.03029.03029.3	15/48	QSPAAGAPKVLLLSG	Q3SZZ2	1222.73
0.999999	1	Heifer_1_Az1_22dec18_RD1_01_440.03067.03067.3	24/84	AKKRLPNSTTAFIRKDALPLGTFS	Q3SYX3	2473.42
0.999999	1	Heifer_1_Az1_22dec18_RD1_01_440.03073.03073.2	2026-10-01	TLCKEQGITVVGICCV	L8HPW7	1635.78
0.999999	1	Heifer_1_Az1_22dec18_RD1_01_440.03102.03102.3	22/48	LREARSRASTPPAAP	P00515	1368.72
0.999999	1	Heifer_1_Az1_22dec18_RD1_01_440.03167.03167.2	2018-10-01	SSGTVLVAGGFA	F1MZF4	906.481
0.999999	1	Heifer_1_Az1_22dec18_RD1_01_440.03168.03168.2	2018-11-01	WVVAMAAGPGTH	L8IDI5	872.443
0.999999	1	Heifer_1_Az1_22dec18_RD1_01_440.03169.03169.3	24/60	PSPDPVGQDPSAEETEAV	F1N393	1627.68
0.999999	1	Heifer_1_Az1_22dec18_RD1_01_440.03182.03182.3	17/52	CSHKDFMLSMGFKAEV	E1BGM9	1626.75
0.999999	1	Heifer_1_Az1_22dec18_RD1_01_440.03185.03185.3	17/60	DLDSLPPTYSAMCPFGCH	P21809	1814.77
0.999999	1	Heifer_1_Az1_22dec18_RD1_01_440.03202.03202.3	1948-10-01	LTPSAVTFSDQLTPN	E1BC87	1362.67
0.999999	1	Heifer_1_Az1_22dec18_RD1_01_440.03205.03205.3	20/52	PPTSASDSGSSQSDSD	L8ITZ3	1311.51
0.999999	1	Heifer_1_Az1_22dec18_RD1_01_440.03248.03248.2	2014-09-01	LMGSPNSHPS	E1BF96	841.339
0.999999	1	Heifer_1_Az1_22dec18_RD1_01_440.03265.03265.2	2018-08-01	YPVRSGMASSSN	G3N2T7	993.455
0.999999	1	Heifer_1_Az1_22dec18_RD1_01_440.03313.03313.3	18/44	AGVVPTSQSLADMQ	L8HYT6	1203.58
0.999999	1	Heifer_1_Az1_22dec18_RD1_01_440.03336.03336.3	17/44	GDTQELRDSLHTVQ	A2VE76	1412.69
0.999999	1	Heifer_1_Az1_22dec18_RD1_01_440.03340.03340.3	16/44	RVVRTLQNTPSLHS	Q2KII7	1363.76
0.999999	1	Heifer_1_Az1_22dec18_RD1_01_440.03344.03344.3	28/84	VLNKGAASGDKRDDNMLSKVMQNL	F1MDF0	2391.16
0.999999	1	Heifer_1_Az1_22dec18_RD1_01_440.03373.03373.3	16/40	SRVVVLLVLLCCA	A7MBK1	1342.78
0.999999	1	Heifer_1_Az1_22dec18_RD1_01_440.03409.03409.3	24/84	LLKNPVQFIQGELQIQDVNDHAPE	E1BDL0	2502.29
0.999999	1	Heifer_1_Az1_22dec18_RD1_01_440.03411.03411.2	2016-08-01	NVPKIKHRKKL	A7E3B5	1132.76
0.999999	1	Heifer_1_Az1_22dec18_RD1_01_440.03445.03445.3	24/100	FIVMSSSSSASSTQQVLSLSTSAPGSGS	Q58DG7	2455.17
0.999999	1	Heifer_1_Az1_22dec18_RD1_01_440.03450.03450.1	2019-10-08	RTGPLGCN	Q5E9L2	603.269
0.999999	1	Heifer_1_Az1_22dec18_RD1_01_440.03531.03531.2	2016-10-01	LPLGAVDDGEH	L8I1Y3	871.392
0.999999	1	Heifer_1_Az1_22dec18_RD1_01_440.03547.03547.3	20/52	QVPKGALVAVVGPVGC	L8IUN4	1261.78
0.999999	1	Heifer_1_Az1_22dec18_RD1_01_440.03615.03615.3	16/56	CIVNNLAEFTVDPKDAG	E1BKX7	1644.84
0.999999	1	Heifer_1_Az1_22dec18_RD1_01_440.03649.03649.2	13/30	WEEATPTVLLAEAQKGKE	F1MRP0	1683.9
0.999999	1	Heifer_1_Az1_22dec18_RD1_01_440.03654.03654.1	2019-10-08	CTGPNGCS	D0NII5	604.227
0.999999	1	Heifer_1_Az1_22dec18_RD1_01_440.03666.03666.3	1956-10-01	GAGVKAWRRAQWQEQVL	Q0P5B0	1811.95
0.999999	1	Heifer_1_Az1_22dec18_RD1_01_440.03670.03670.3	25/88	GPAAPGGSAAGAGGAGVTGGTAGSG	E1BIV1	1697.8
0.999999	1	Heifer_1_Az1_22dec18_RD1_01_440.03671.03671.3	22/80	RSLRDCLSGLRMEERAFSYVLTH	F1MCR3	2502.24
0.999999	1	Heifer_1_Az1_22dec18_RD1_01_440.03682.03682.3	25/92	PVVSKASAGAMEVMDVFSTDDLAGFL	A1L561	2478.13
0.999999	1	Heifer_1_Az1_22dec18_RD1_01_440.03696.03696.1	2022-11-01	CPTLVPPTDSLGPG	A7Z026	1192.63
0.999999	1	Heifer_1_Az1_22dec18_RD1_01_440.03700.03700.2	13/30	STPSRPGSDGFALEPLLP	F1MIX6	1655.85
0.999999	1	Heifer_1_Az1_22dec18_RD1_01_440.03706.03706.2	13/32	DFAQQKLTDKNLGFQMLQK	E1BE55	2009.04
0.999999	1	Heifer_1_Az1_22dec18_RD1_01_440.03723.03723.2	2018-11-01	KCENLPGTYICK	F1N6H1	1225.51
0.999999	1	Heifer_1_Az1_22dec18_RD1_01_440.03763.03763.2	2018-10-01	FFLKGDPTTSCQ	F1MNH3	1124.52
0.999999	1	Heifer_1_Az1_22dec18_RD1_01_440.03764.03764.3	17/48	APVRLDLPPEKPLAS	A6QLF6	1443.84
0.999999	1	Heifer_1_Az1_22dec18_RD1_01_440.03770.03770.2	14/34	SGGSGGMGGSGGGGGSGGGS	F1MBI8	1208.45
0.999999	1	Heifer_1_Az1_22dec18_RD1_01_440.03803.03803.2	2020-12-01	DVFEADSVVLRCQ	G3MXQ1	1293.64
0.999999	1	Heifer_1_Az1_22dec18_RD1_01_440.03818.03818.1	2019-10-09	RTGPLGCN	Q5E9L2	603.269
0.999999	1	Heifer_1_Az1_22dec18_RD1_01_440.03835.03835.2	2022-10-01	FVGESTMVAIAACY	F1MAW1	1207.56
0.999999	1	Heifer_1_Az1_22dec18_RD1_01_440.03852.03852.3	25/56	PLQIGPFCITLTRDMWL	A0JNI0	1865.92
0.999999	1	Heifer_1_Az1_22dec18_RD1_01_440.03853.03853.2	2028-10-01	ADALLGRATVDLKQALL	Q32PG0	1582.9
0.999999	1	Heifer_1_Az1_22dec18_RD1_01_440.03868.03868.2	13/38	AAYCQFMDMLFPGSIALKKVKF	Q3ZBD9	2362.19
0.999999	1	Heifer_1_Az1_22dec18_RD1_01_440.03899.03899.1	2019-10-08	CTGPNGCS	D0NII5	604.227
0.999999	1	Heifer_1_Az1_22dec18_RD1_01_440.03905.03905.3	25/64	MDSPGSVFCRDASESFGEL	F1MHX3	1845.75
0.999999	1	Heifer_1_Az1_22dec18_RD1_01_440.03938.03938.3	16/48	TLLVSMAPLTNEIRP	F1MQF4	1471.81
0.999999	1	Heifer_1_Az1_22dec18_RD1_01_440.03940.03940.1	2020-10-01	APPSKAPPSGSAP	A5PKI6	994.508
0.999999	1	Heifer_1_Az1_22dec18_RD1_01_440.03951.03951.3	19/64	YQGMASSADVALVELEAPV	M5FK93	1686.81
0.999999	1	Heifer_1_Az1_22dec18_RD1_01_440.03979.03979.2	2022-12-01	SPCPTPPHPPPTPQ	F1N4N3	1293.62
0.999999	1	Heifer_1_Az1_22dec18_RD1_01_440.04006.04006.3	17/40	SEQVLSLVAQFQK	L8I5L0	1260.67
0.999999	1	Heifer_1_Az1_22dec18_RD1_01_440.04017.04017.3	17/88	VVPISKSEALQRSGRAGRTSSGKCF	Q08DS9	2431.27
0.999999	1	Heifer_1_Az1_22dec18_RD1_01_440.04019.04019.1	2016-10-01	DKSSLSSLDCL	P17667	995.459
0.999999	1	Heifer_1_Az1_22dec18_RD1_01_440.04031.04031.3	18/56	VCAGLLASTGLKLDSMV	L8IB83	1535.77
0.999999	1	Heifer_1_Az1_22dec18_RD1_01_440.04042.04042.3	18/60	LFAVVGMQLFGKSYKDCV	M0QW12	1848.89
0.999999	1	Heifer_1_Az1_22dec18_RD1_01_440.04046.04046.1	2016-11-01	PPPMSSAMMQS	F1MXE2	994.392
0.999999	1	Heifer_1_Az1_22dec18_RD1_01_440.04050.04050.3	23/60	LHWSMWLGVFAALHLTAL	F1MWI8	1838.93
0.999999	1	Heifer_1_Az1_22dec18_RD1_01_440.04053.04053.2	1936-12-01	ALPSDRGGSPGSPGSAGPRAA	F1MI25	1721.84
0.999999	1	Heifer_1_Az1_22dec18_RD1_01_440.04057.04057.2	2019-12-06	ERCTGHSSG	F1MRA8	803.334
0.999999	1	Heifer_1_Az1_22dec18_RD1_01_440.04067.04067.2	13/22	LSPALPPGYSYTGL	E1BA82	1208.57
0.999999	1	Heifer_1_Az1_22dec18_RD1_01_440.04069.04069.3	18/68	DHSFGPMSGSANGSNLYDAV	F1MUW6	1810.76
0.999999	1	Heifer_1_Az1_22dec18_RD1_01_440.04089.04089.3	15/44	TASEAASRKSQIKA	G3N374	1274.69
0.999999	1	Heifer_1_Az1_22dec18_RD1_01_440.04122.04122.3	15/56	RRTFQRVYEIDITDASV	Q32LB0	1812.9
0.999999	1	Heifer_1_Az1_22dec18_RD1_01_440.04127.04127.3	20/64	VCPICSAMPWGDPSYKSAN	A6H736	1941.81
0.999999	1	Heifer_1_Az1_22dec18_RD1_01_440.04135.04135.3	15/68	DESLDFTYGVGPKSAGSVVG	Q9N0J2	1811.89
0.999999	1	Heifer_1_Az1_22dec18_RD1_01_440.04193.04193.1	2019-10-08	LTLEFSEN	D0N1E5	724.328
0.999999	1	Heifer_1_Az1_22dec18_RD1_01_440.04208.04208.1	2026-11-01	PVPKASGSTLSSGSGN	L8HYW3	1233.62
0.999999	1	Heifer_1_Az1_22dec18_RD1_01_440.04222.04222.2	2026-12-01	RVPGSEEDAQPGYHRN	L8J0X3	1540.69
0.999999	1	Heifer_1_Az1_22dec18_RD1_01_440.04225.04225.2	2020-09-01	RDHGGCSPHANCT	E1BNJ1	1210.42
0.999999	1	Heifer_1_Az1_22dec18_RD1_01_440.04226.04226.2	2022-08-01	TPPFSSSCGVLGTG	Q3MHZ4	1207.55
0.999999	1	Heifer_1_Az1_22dec18_RD1_01_440.04231.04231.2	2026-12-01	QIAESASSSSPQSSGG	L8IBL0	1293.57
0.999999	1	Heifer_1_Az1_22dec18_RD1_01_440.04240.04240.2	2028-11-01	LGTVEFLLLTVMSYNCY	G3MZG6	1745.84
0.999999	1	Heifer_1_Az1_22dec18_RD1_01_440.04314.04314.3	20/64	DPSNGPLMQLISVATSGES	L8HPB9	1699.85
0.999999	1	Heifer_1_Az1_22dec18_RD1_01_440.04315.04315.3	25/88	KISVGDVDSVTVGAEETPESRNGVK	F1MIV1	2316.11
0.999999	1	Heifer_1_Az1_22dec18_RD1_01_440.04340.04340.1	2019-10-08	ETGLWQCP	L8J0U7	763.332
0.999999	1	Heifer_1_Az1_22dec18_RD1_01_440.04355.04355.3	25/76	ELALARNGKVLATSNGIPGLAV	E1BGL8	1935.13
0.999999	1	Heifer_1_Az1_22dec18_RD1_01_440.04396.04396.3	21/68	CARCLVGAPFASLVATGLCF	P04116	1861.95
0.999999	1	Heifer_1_Az1_22dec18_RD1_01_440.04402.04402.2	2026-10-01	RRTCANGVRTEPPSWL	F1MLR9	1629.77
0.999999	1	Heifer_1_Az1_22dec18_RD1_01_440.04434.04434.3	19/56	SSLHASSFTPGTSPTSV	F1N415	1475.69
0.999999	1	Heifer_1_Az1_22dec18_RD1_01_440.04441.04441.2	2022-10-01	SRRAAKALLPGGAY	E1BDW5	1179.72
0.999999	1	Heifer_1_Az1_22dec18_RD1_01_440.04466.04466.3	18/48	DINSVRYYPSGDAFA	L8IBR9	1487.7
0.999999	1	Heifer_1_Az1_22dec18_RD1_01_440.04502.04502.3	20/48	LCNLPNNSLAFLLAD	F1MSA3	1445.73
0.999999	1	Heifer_1_Az1_22dec18_RD1_01_440.04506.04506.3	20/52	AVRTACRYDPRSNSWA	F1ML43	1766.83
0.999999	1	Heifer_1_Az1_22dec18_RD1_01_440.04514.04514.3	18/52	TSASEGSSDGSGSHHE	L8HQR2	1300.49
0.999999	1	Heifer_1_Az1_22dec18_RD1_01_440.04537.04537.2	2026-11-01	SRMEKYVIESSGHAEL	E1BA93	1650.77
0.999999	1	Heifer_1_Az1_22dec18_RD1_01_440.04595.04595.3	23/100	EAKGDTVVVTGSITGLTHGGPKDEERHV	Q9TS96	2660.35
0.999999	1	Heifer_1_Az1_22dec18_RD1_01_440.04630.04630.3	24/92	LAMQAGIPMGPIPAGGMPYLGQAPFL	F1MI41	2387.15
0.999999	1	Heifer_1_Az1_22dec18_RD1_01_440.04636.04636.2	2022-09-01	GSAGSSGGGSSSGG	A7Z088	896.347
0.999999	1	Heifer_1_Az1_22dec18_RD1_01_440.04669.04669.3	19/76	ALSDNKEIFLSKAIHKCFIEVN	E1BCA5	2390.27
0.999999	1	Heifer_1_Az1_22dec18_RD1_01_440.04684.04684.3	23/84	EEPPEVQSLPADEAPAEEATEEVQ	Q2T9N0	2336.05
0.999999	1	Heifer_1_Az1_22dec18_RD1_01_440.04726.04726.3	16/60	FPPLWPHSTTTTSPSLPL	Q32KT5	1717.87
0.999999	1	Heifer_1_Az1_22dec18_RD1_01_440.04730.04730.3	22/56	LAMSALGVLLGAVCGVV	E1BMX5	1416.75
0.999999	1	Heifer_1_Az1_22dec18_RD1_01_440.04744.04744.3	21/60	LVLTVCISQSQASSRAIR	E1BA71	1718.9
0.999999	1	Heifer_1_Az1_22dec18_RD1_01_440.04751.04751.2	2016-08-01	KVILDGMGKMQ	L8J5D9	962.493
0.999999	1	Heifer_1_Az1_22dec18_RD1_01_440.04762.04762.3	18/52	PTGPPGPPGPRGNAGE	P23206	1230.61
0.999999	1	Heifer_1_Az1_22dec18_RD1_01_440.04768.04768.2	13/22	NECGPPSPVDCGSS	Q8SQA4	1260.48
0.999999	1	Heifer_1_Az1_22dec18_RD1_01_440.04831.04831.2	2016-08-01	YDPDGSGLRKA	L8HV59	943.472
0.999999	1	Heifer_1_Az1_22dec18_RD1_01_440.04842.04842.3	18/44	GVFKPKSEEPYGHL	A6QLA2	1416.7
0.999999	1	Heifer_1_Az1_22dec18_RD1_01_440.04845.04845.2	2024-10-01	PEERGTEPPAAMSQE	F1N3B5	1401.62
0.999999	1	Heifer_1_Az1_22dec18_RD1_01_440.04850.04850.3	1944-09-01	KGLKFTVSSGCSSE	Q5BIM8	1228.58
0.999999	1	Heifer_1_Az1_22dec18_RD1_01_440.04862.04862.3	17/44	LFSSPTKADSGKEQ	L8I7U4	1252.59
0.999999	1	Heifer_1_Az1_22dec18_RD1_01_440.04869.04869.2	2016-11-01	CTVKNPAEDHF	Q1RMI7	1009.48
0.999999	1	Heifer_1_Az1_22dec18_RD1_01_440.04873.04873.2	14/30	ALPSILQRILQDPVYGKG	E1BPY6	1839.06
0.999999	1	Heifer_1_Az1_22dec18_RD1_01_440.04876.04876.3	18/44	PGFKYSLSPGSFSR	G3X8G9	1275.61
0.999999	1	Heifer_1_Az1_22dec18_RD1_01_440.04891.04891.3	21/48	RGFKHYVSCSAVDTL	Q9TTV9	1469.66
0.999999	1	Heifer_1_Az1_22dec18_RD1_01_440.04896.04896.3	20/60	SSPYSAAKFALDSFFSSL	Q6Q7D1	1723.81
0.999999	1	Heifer_1_Az1_22dec18_RD1_01_440.04909.04909.3	20/52	KEEPPSPPQSPRAEGA	Q08DJ8	1476.68
0.999999	1	Heifer_1_Az1_22dec18_RD1_01_440.04919.04919.2	2020-09-01	LTSCINATQAANQ	Q9GK16	1149.51
0.999999	1	Heifer_1_Az1_22dec18_RD1_01_440.04924.04924.3	23/80	WRRSSLVITTKIFWGGKAETERG	Q27955	2434.34
0.999999	1	Heifer_1_Az1_22dec18_RD1_01_440.04974.04974.2	2014-08-01	VTHDAAHAQM	Q2KI13	849.373
0.999999	1	Heifer_1_Az1_22dec18_RD1_01_440.04975.04975.2	2018-11-01	KVGAVATYRGPS	F1MC90	989.529
0.999999	1	Heifer_1_Az1_22dec18_RD1_01_440.05023.05023.3	22/48	GSGYTADGRDVDECR	L8IXA0	1443.56
0.999999	1	Heifer_1_Az1_22dec18_RD1_01_440.05025.05025.3	20/48	PEEEPEYHAEAAAQE	Q0III0	1472.61
0.999999	1	Heifer_1_Az1_22dec18_RD1_01_440.05029.05029.3	18/44	AISFLCGVIAIALP	A4FV89	1275.73
0.999999	1	Heifer_1_Az1_22dec18_RD1_01_440.05035.05035.3	18/52	EHKAATVLTAMSQQRA	G3N3V8	1540.81
0.999999	1	Heifer_1_Az1_22dec18_RD1_01_440.05044.05044.3	23/72	KMAAAAAAASGPGCSSAAGAG	L8IP36	1548.67
0.999999	1	Heifer_1_Az1_22dec18_RD1_01_440.05048.05048.3	13/44	ASGNRPGSVIRVYG	F1MZ69	1303.7
0.999999	1	Heifer_1_Az1_22dec18_RD1_01_440.05064.05064.3	17/52	KGEGGAQDSPVPEAHL	Q9XSX7	1349.58
0.999999	1	Heifer_1_Az1_22dec18_RD1_01_440.05071.05071.3	19/52	VKCSGTELSLAHCRHD	A6H737	1654.77
0.999999	1	Heifer_1_Az1_22dec18_RD1_01_440.05076.05076.3	18/44	STFSHFSLFHMAAN	Q2KHV4	1410.64
0.999999	1	Heifer_1_Az1_22dec18_RD1_01_440.05105.05105.2	2018-12-01	RVVVATVAFGMG	D0NP52	1008.53
0.999999	1	Heifer_1_Az1_22dec18_RD1_01_440.05126.05126.3	17/36	LCRENAMCRTKA	E1BPQ3	1340.57
0.999999	1	Heifer_1_Az1_22dec18_RD1_01_440.05164.05164.3	15/40	AILVSLDPMLTSS	F1MQF9	1203.64
0.999999	1	Heifer_1_Az1_22dec18_RD1_01_440.05233.05233.2	2016-08-01	SGSSLGFKASY	L8ILE9	852.434
0.999999	1	Heifer_1_Az1_22dec18_RD1_01_440.05238.05238.2	2018-10-01	RGKKSSSTSGMS	G3X6V3	968.46
0.999999	1	Heifer_1_Az1_22dec18_RD1_01_440.05254.05254.2	2024-11-01	GPEKGGGSAAAAAAA	F1MQ55	1056.52
0.999999	1	Heifer_1_Az1_22dec18_RD1_01_440.05282.05282.3	18/64	GRLGTAGTAGRACNSSSPA	L8IHY3	1661.79
0.999999	1	Heifer_1_Az1_22dec18_RD1_01_440.05285.05285.2	14/36	GMGLPGNQGEPGSKGQPGDSG	F1MTP1	1827.81
0.999999	1	Heifer_1_Az1_22dec18_RD1_01_440.05313.05313.2	2014-10-01	CCKTGVAQKS	F1MFR1	890.464
0.999999	1	Heifer_1_Az1_22dec18_RD1_01_440.05330.05330.3	18/56	GESCPAFPSACACSSQT	L8HPG4	1657.62
0.999999	1	Heifer_1_Az1_22dec18_RD1_01_440.05358.05358.3	20/60	EPGSPGVPGVDGEQGLKG	G3MYG7	1492.75
0.999999	1	Heifer_1_Az1_22dec18_RD1_01_440.05365.05365.3	15/56	QPNFGGPASPAGSNPAR	F1MSL5	1339.62
0.999999	1	Heifer_1_Az1_22dec18_RD1_01_440.05382.05382.2	2019-12-09	LYGQVLYRL	E1BB38	897.471
0.999999	1	Heifer_1_Az1_22dec18_RD1_01_440.05414.05414.3	16/64	VASTSSDRTPSSMPPAGPS	L8J115	1660.74
0.999999	1	Heifer_1_Az1_22dec18_RD1_01_440.05421.05421.2	1932-12-01	PALNSKRFMSSGRSLGCQP	E1BPG1	1897.93
0.999999	1	Heifer_1_Az1_22dec18_RD1_01_440.05431.05431.3	23/76	RGPPPSPPPLPPALDGGAAPEE	L8HYC7	1832.93
0.999999	1	Heifer_1_Az1_22dec18_RD1_01_440.05435.05435.2	1930-12-01	DDNGNILDPDETSTVALF	F1MJ73	1672.78
0.999999	1	Heifer_1_Az1_22dec18_RD1_01_440.05445.05445.2	2014-08-01	LCPGGQEYQE	P98167	937.36
0.999999	1	Heifer_1_Az1_22dec18_RD1_01_440.05468.05468.3	14/52	VFSKVLAEGLEEIDYL	F1MVI7	1611.8
0.999999	1	Heifer_1_Az1_22dec18_RD1_01_440.05469.05469.3	19/56	GDSTVGKSCLIRRFTEG	Q17QU4	1767.89
0.999999	1	Heifer_1_Az1_22dec18_RD1_01_440.05476.05476.3	19/44	VKNLLFIGVILICF	L8I111	1401.84
0.999999	1	Heifer_1_Az1_22dec18_RD1_01_440.05479.05479.3	13/60	LGMELAGGVPLDQCQGLS	E1B8K5	1659.76
0.999999	1	Heifer_1_Az1_22dec18_RD1_01_440.05507.05507.3	23/56	EKIGLKDAGQCIDPYIT	L8I5K1	1689.88
0.999999	1	Heifer_1_Az1_22dec18_RD1_01_440.05523.05523.2	2026-11-01	MTCLIHVLEAWFGVEH	Q0VCR6	1672.83
0.999999	1	Heifer_1_Az1_22dec18_RD1_01_440.05542.05542.3	14/56	LIPSLDWLPVSDGLVSR	G5E6J3	1596.84
0.999999	1	Heifer_1_Az1_22dec18_RD1_01_440.05551.05551.3	19/56	TGSSFCAGSNNQVHLWL	P27479	1662.72
0.999999	1	Heifer_1_Az1_22dec18_RD1_01_440.05585.05585.2	2028-11-01	KKPPRTPGGLGQPQGRS	E1BN32	1544.85
0.999999	1	Heifer_1_Az1_22dec18_RD1_01_440.05587.05587.2	2019-12-09	KLSRTPKCA	L8IAW5	860.454
0.999999	1	Heifer_1_Az1_22dec18_RD1_01_440.05594.05594.3	27/116	SLQAGVAAPGQIPATVTGPGPGSLAPAGGMQA	Q8HXM1	2670.38
0.999999	1	Heifer_1_Az1_22dec18_RD1_01_440.05596.05596.3	19/48	VFKAGQENISVSKRD	A2VDL6	1462.79
0.999999	1	Heifer_1_Az1_22dec18_RD1_01_440.05626.05626.3	19/52	LDDDGKMEHDCSSGMT	Q95LI3	1598.53
0.999999	1	Heifer_1_Az1_22dec18_RD1_01_440.05639.05639.2	2020-10-01	GSGGSGEGSGPCT	E1BN32	950.34
0.999999	1	Heifer_1_Az1_22dec18_RD1_01_440.05642.05642.2	2016-07-01	LSVSAGAHGDL	F1MJZ3	799.346
0.999999	1	Heifer_1_Az1_22dec18_RD1_01_440.05663.05663.3	14/40	PRGVSSRSTFHAG	A6QNL2	1203.61
0.999999	1	Heifer_1_Az1_22dec18_RD1_01_440.05665.05665.3	18/56	-MWRGSSAGGSQGAAME	A1L515	1468.62
0.999999	1	Heifer_1_Az1_22dec18_RD1_01_440.05668.05668.2	13/30	DGTLIKVQTDPSGIYIAT	E1BCH1	1674.92
0.999999	1	Heifer_1_Az1_22dec18_RD1_01_440.05676.05676.3	13/36	PTVVVEDLRLCT	L8IEI9	1202.63
0.999999	1	Heifer_1_Az1_22dec18_RD1_01_440.05713.05713.2	2022-12-01	FCHCPPGFQGSICQ	G3X812	1418.55
0.999999	1	Heifer_1_Az1_22dec18_RD1_01_440.05720.05720.3	18/52	AVMALRREDVNAWERR	A8E657	1759.88
0.999999	1	Heifer_1_Az1_22dec18_RD1_01_440.05754.05754.3	17/48	KKQVVAKAPVKMAAA	Q0IIG0	1355.8
0.999999	1	Heifer_1_Az1_22dec18_RD1_01_440.05784.05784.1	2024-09-01	PKYASSPKPNNSYMF	F1MBJ2	1485.69
0.999999	1	Heifer_1_Az1_22dec18_RD1_01_440.05810.05810.3	24/84	SPSPPCSPLPGAWTLTSSSLPAGE	E1BNE5	2179.06
0.999999	1	Heifer_1_Az1_22dec18_RD1_01_440.05811.05811.3	24/72	FFESVKMSTYLVAFIVGEMKN	F1N1Q8	2210.1
0.999999	1	Heifer_1_Az1_22dec18_RD1_01_440.05851.05851.3	22/64	VPEVMMLEACSRIQEFCEQ	Q58CZ9	2143.9
0.999999	1	Heifer_1_Az1_22dec18_RD1_01_440.05861.05861.3	16/52	AQTFMRTCSEAIQQLR	L8IPB3	1711.8
0.999999	1	Heifer_1_Az1_22dec18_RD1_01_440.05895.05895.2	2014-09-01	VCARLMLGCY	L8HP85	995.435
0.999999	1	Heifer_1_Az1_22dec18_RD1_01_440.05956.05956.2	1930-12-01	GSTSPRVSSELEQARPQT	Q0VCE0	1770.89
0.999999	1	Heifer_1_Az1_22dec18_RD1_01_440.05973.05973.2	2014-10-01	LCQASSKSKE	E1BLM8	894.423
0.999999	1	Heifer_1_Az1_22dec18_RD1_01_440.05997.05997.2	2024-10-01	KSSGAIIAAVVVIVL	E1BF08	1197.73
0.999999	1	Heifer_1_Az1_22dec18_RD1_01_440.06003.06003.3	27/104	AFHSPRWGGIMVYNVDPKAYNGSQLPVRV	Q3SZL5	3103.55
0.999999	1	Heifer_1_Az1_22dec18_RD1_01_440.06006.06006.2	2018-08-01	AAEKKDSGPYKM	P01190	1121.57
0.999999	1	Heifer_1_Az1_22dec18_RD1_01_440.06014.06014.3	16/64	LGLQGLPGPPGEGENGDVG	Q9TSC1	1591.75
0.999999	1	Heifer_1_Az1_22dec18_RD1_01_440.06031.06031.3	19/48	SSGPSVSGRKIKTAV	E1BIX5	1286.73
0.999999	1	Heifer_1_Az1_22dec18_RD1_01_440.06074.06074.2	2020-10-01	MGQMAMGGAMGIN	G3N361	1038.43
0.999999	1	Heifer_1_Az1_22dec18_RD1_01_440.06086.06086.3	18/48	RDATATPPSSPSMSS	E1BG62	1247.53
0.999999	1	Heifer_1_Az1_22dec18_RD1_01_440.06101.06101.3	13/32	LFVYWSFLLRF	E1BP59	1229.66
0.999999	1	Heifer_1_Az1_22dec18_RD1_01_440.06157.06157.3	15/52	GPRVKDGGALGTKAAQ	Q2HJ91	1339.76
0.999999	1	Heifer_1_Az1_22dec18_RD1_01_440.06193.06193.3	19/44	VDSTCSTRNIPSFD	F2FB39	1383.61
0.999999	1	Heifer_1_Az1_22dec18_RD1_01_440.06199.06199.2	2016-09-01	LMLIDVREPWE	A8R4B3	1173.59
0.999999	1	Heifer_1_Az1_22dec18_RD1_01_440.06205.06205.3	15/72	APTAPNGCTGDANGHSQAEAP	Q2NL29	1853.76
0.999999	1	Heifer_1_Az1_22dec18_RD1_01_440.06226.06226.3	22/76	PSTTTTTKAPRPTPVPRAYLVP	E1B928	2156.2
0.999999	1	Heifer_1_Az1_22dec18_RD1_01_440.06274.06274.3	22/60	TSVTPMRAGQSEAGCCLL	F1MNJ8	1722.75
0.999999	1	Heifer_1_Az1_22dec18_RD1_01_440.06316.06316.3	17/52	LHEVIYVIGGHCGYRG	F1MJS0	1658.8
0.999999	1	Heifer_1_Az1_22dec18_RD1_01_440.06330.06330.2	2028-10-01	PSSGQGGAASPGSSLGL	L8IFW5	1218.55
0.999999	1	Heifer_1_Az1_22dec18_RD1_01_440.06380.06380.2	2019-12-09	KRNAVAFRS	E1BFR5	832.467
0.999999	1	Heifer_1_Az1_22dec18_RD1_01_440.06381.06381.3	13/52	PTKTPTQIPIPPLPAV	E1BA77	1472.86
0.999999	1	Heifer_1_Az1_22dec18_RD1_01_440.06389.06389.2	2018-09-01	ETGSSGSSDEQG	F1MIW9	953.357
0.999999	1	Heifer_1_Az1_22dec18_RD1_01_440.06426.06426.2	2022-12-01	ECDDKGDGSCDVRY	L8I022	1382.52
0.999999	1	Heifer_1_Az1_22dec18_RD1_01_440.06478.06478.2	2020-11-01	AGRDEVRPEEIAD	L8J1T5	1269.63
0.999999	1	Heifer_1_Az1_22dec18_RD1_01_440.06534.06534.3	21/72	LEYSALNEENKAASKPALCLE	Q28201	2107.03
0.999999	1	Heifer_1_Az1_22dec18_RD1_01_440.06544.06544.3	15/52	QSGSSTNGNNGSESSK	A0JNC9	1283.49
0.999999	1	Heifer_1_Az1_22dec18_RD1_01_440.06555.06555.3	1948-12-01	LSPLPEELPLSPSGE	E1B9N8	1321.68
0.999999	1	Heifer_1_Az1_22dec18_RD1_01_440.06648.06648.3	20/48	VVPPAKGRAVLEEKV	F1N757	1392.81
0.999999	1	Heifer_1_Az1_22dec18_RD1_01_440.06682.06682.3	17/48	-MAGLGGEPIPDGEF	A2VE45	1241.56
0.999999	1	Heifer_1_Az1_22dec18_RD1_01_440.06691.06691.3	16/60	ELEGRGAGGVAGGPAAGP	E1BJE6	1295.66
0.999999	1	Heifer_1_Az1_22dec18_RD1_01_440.06700.06700.3	19/56	FQGLPGPPGPPGEAGKP	F1N2Y2	1357.7
0.999999	1	Heifer_1_Az1_22dec18_RD1_01_440.06797.06797.3	20/84	TLPWPSAQQDQSKLYHLPPPTVGP	G5E5S5	2458.26
0.999999	1	Heifer_1_Az1_22dec18_RD1_01_440.06833.06833.3	17/48	GGAAVRDALFPGQRC	E1BD74	1356.73
0.999999	1	Heifer_1_Az1_22dec18_RD1_01_440.06835.06835.3	13/44	EPTIPTTPEPTTPT	E1BB32	1250.64
0.999999	1	Heifer_1_Az1_22dec18_RD1_01_440.06848.06848.2	2016-09-01	PRPRAGPRGPR	L8IIJ5	962.552
0.999999	1	Heifer_1_Az1_22dec18_RD1_01_440.06850.06850.3	13/40	CASHLSVVVLCYG	G5E6B7	1246.64
0.999999	1	Heifer_1_Az1_22dec18_RD1_01_440.06861.06861.3	19/52	LTPQKHSAVCPAEDAR	E1BLE4	1509.69
0.999999	1	Heifer_1_Az1_22dec18_RD1_01_440.06880.06880.2	1932-12-01	KMPYSGMTGAQVIQMLGQN	E1BPI3	1858.83
0.999999	1	Heifer_1_Az1_22dec18_RD1_01_440.06887.06887.3	21/60	GSTTSLGSDFSLVMESSP	A6QLE9	1646.73
0.999999	1	Heifer_1_Az1_22dec18_RD1_01_440.06901.06901.3	17/48	TGSRFGLGDKVRYRC	Q3SYW2	1509.82
0.999999	1	Heifer_1_Az1_22dec18_RD1_01_440.06913.06913.3	17/44	LEAPGTRRHTLPEK	L8IBM5	1362.7
0.999999	1	Heifer_1_Az1_22dec18_RD1_01_440.06916.06916.2	2016-10-01	SYEVIVAEGES	F1N6H4	1007.48
0.999999	1	Heifer_1_Az1_22dec18_RD1_01_440.06929.06929.2	1932-11-01	LDMEKRNNSLPDENNVARL	A5PK17	2016.93
0.999999	1	Heifer_1_Az1_22dec18_RD1_01_440.06955.06955.1	2022-12-01	GTGCQLGLITTTFP	F1MDF3	1310.65
0.999999	1	Heifer_1_Az1_22dec18_RD1_01_440.06978.06978.2	2018-09-01	FPATPNPAPAQA	E1BC33	962.482
0.999999	1	Heifer_1_Az1_22dec18_RD1_01_440.06987.06987.3	14/44	LPPPPVPPKSEAVR	A1L525	1213.67
0.999999	1	Heifer_1_Az1_22dec18_RD1_01_440.07022.07022.3	1940-12-01	EEGFESPTGTDCP	F1MYX9	1198.44
0.999999	1	Heifer_1_Az1_22dec18_RD1_01_440.07049.07049.3	13/44	VVVKCDGRGSGFQG	P42659	1308.62
0.999999	1	Heifer_1_Az1_22dec18_RD1_01_440.07099.07099.3	17/44	STDPFSEASNSSNT	L8IPM6	1254.5
0.999999	1	Heifer_1_Az1_22dec18_RD1_01_440.07142.07142.3	15/36	PCIDLIERPANP	Q27991	1199.6
0.999999	1	Heifer_1_Az1_22dec18_RD1_01_440.07155.07155.3	14/52	HAEYHGAVPTGHRLPD	G3N2W0	1503.76
0.999999	1	Heifer_1_Az1_22dec18_RD1_01_440.07302.07302.3	15/52	SGDANSVDVSGGLETE	E1BEP4	1319.58
0.999999	1	Heifer_1_Az1_22dec18_RD1_01_440.07339.07339.3	23/76	SGKKKVGDPSGARGGPGSGGET	F1N7K7	1796.91
0.999999	1	Heifer_1_Az1_22dec18_RD1_01_440.07382.07382.3	16/40	LRIAAFEEGGKFV	L8ILS4	1223.63
0.999999	1	Heifer_1_Az1_22dec18_RD1_01_440.07391.07391.3	14/36	LDAEVEYDMDEE	E1B8Z0	1230.42
0.999999	1	Heifer_1_Az1_22dec18_RD1_01_440.07406.07406.2	2018-09-01	GTGAHAGGGPRA	F1N3Q1	879.431
0.999999	1	Heifer_1_Az1_22dec18_RD1_01_440.07491.07491.3	17/44	TFRSGDDVNMDIGV	F1N6H1	1340.57
0.999999	1	Heifer_1_Az1_22dec18_RD1_01_440.07494.07494.3	14/60	FPPMGLVAPKPASGDPGR	L8IJQ6	1489.76
0.999999	1	Heifer_1_Az1_22dec18_RD1_01_440.07602.07602.3	15/48	-MEALPDAAVLATRL	G3MZV6	1372.7
0.999999	1	Heifer_1_Az1_22dec18_RD1_01_440.07611.07611.3	14/48	RSAEGQWEAQPALES	A4FV37	1414.64
0.999999	1	Heifer_1_Az1_22dec18_RD1_01_440.07623.07623.2	2022-11-01	CFILMPTGGGKSLC	E1BQ04	1235.66
0.999999	1	Heifer_1_Az1_22dec18_RD1_01_440.07685.07685.3	22/112	RRGRRPGIRAVPRAAVRGDRDPPVLFRHYPD	A2VDY1	3336.88
0.999999	1	Heifer_1_Az1_22dec18_RD1_01_440.07844.07844.3	1940-10-01	PSMLARLEKSSSS	F1MTM9	1223.62
0.999999	1	Heifer_1_Az1_22dec18_RD1_01_440.07845.07845.3	13/48	VIFYGVFASGEKQPW	A4FV52	1441.72
0.999999	1	Heifer_1_Az1_22dec18_RD1_01_440.07866.07866.3	14/52	PALCLPPPPAPGPMGN	E1BL20	1373.68
0.999999	1	Heifer_1_Az1_22dec18_RD1_01_440.07899.07899.3	16/44	KLTDSPGLFSAQDT	E1BGA4	1249.58
0.999999	1	Heifer_1_Az1_22dec18_RD1_01_440.07939.07939.2	2014-08-01	RHTDLECAST	Q32L18	931.37
0.999999	1	Heifer_1_Az1_22dec18_RD1_01_440.08057.08057.1	2019-12-09	ACMMAFMVK	Q5Y4Q1	888.337
0.999999	1	Heifer_1_Az1_22dec18_RD1_01_440.08066.08066.2	2024-11-01	WTSPSWNGASERASS	E1BM27	1348.6
0.999999	1	Heifer_1_Az1_22dec18_RD1_01_440.08169.08169.3	21/76	PAPVRKPGPLPSSLDDLKVSEL	E1BF37	2104.15
0.999999	1	Heifer_1_Az1_22dec18_RD1_01_440.08225.08225.3	23/76	YGSSPGPGPAPSPGRPPAKPPE	F1N0W4	1806.94
0.999999	1	Heifer_1_Az1_22dec18_RD1_01_440.08249.08249.3	14/56	LDTAGQEDYAAIRDNYF	L8IZ47	1700.73
0.999999	1	Heifer_1_Az1_22dec18_RD1_01_440.08259.08259.2	2014-10-01	LASNSNFTGT	E1BIW9	796.335
0.999999	1	Heifer_1_Az1_22dec18_RD1_01_440.08341.08341.3	14/48	QHVTAALYGVVNVKK	Q2TBM0	1369.77
0.999999	1	Heifer_1_Az1_22dec18_RD1_01_440.08344.08344.3	14/48	GCTPGAHVDCGWLAC	G3MZL5	1442.61
0.999999	1	Heifer_1_Az1_22dec18_RD1_01_440.08353.08353.1	2019-10-06	PHSWCLPP	A6QPB7	798.348
0.999999	1	Heifer_1_Az1_22dec18_RD1_01_440.08389.08389.2	2022-11-01	LKGKVMASMFYEVS	F1MVC0	1404.68
0.999999	1	Heifer_1_Az1_22dec18_RD1_01_440.08434.08434.3	13/40	ACLEAEEAGLPLQ	F1MT98	1200.57
0.999999	1	Heifer_1_Az1_22dec18_RD1_01_440.08468.08468.2	2016-08-01	LHLDCPGRVPD	Q0VD56	1049.51
0.999999	1	Heifer_1_Az1_22dec18_RD1_01_440.08526.08526.2	2016-09-01	RCGHKQMVPCS	E1BN24	1131.46
0.999999	1	Heifer_1_Az1_22dec18_RD1_01_440.08669.08669.1	2014-08-01	RPAPGTAAAA	Q08DQ5	654.334
0.999999	1	Heifer_1_Az1_22dec18_RD1_01_440.08671.08671.3	17/72	PRVLAGFLFFSWTACWSLPLP	O77656	2270.17
0.999999	1	Heifer_1_Az1_22dec18_RD1_01_440.08737.08737.3	14/52	HAHQHHPHSHPAQQPP	E1B8C0	1607.75
0.999999	1	Heifer_1_Az1_22dec18_RD1_01_440.08765.08765.3	17/44	QEVVREIENQKTDA	A8E658	1458.73
0.999999	1	Heifer_1_Az1_22dec18_RD1_01_440.08797.08797.3	14/44	QRGSLIVDMVSDKG	F1MLZ9	1334.69
0.999999	1	Heifer_1_Az1_22dec18_RD1_01_440.08893.08893.3	18/68	LSPAGVGGMGLLGPGGLPGF	F1N3B5	1492.77
0.999999	1	Heifer_1_Az1_22dec18_RD1_01_440.08894.08894.2	2018-09-01	RCPVCGRGFGHR	L8IZL6	1145.49
0.999999	1	Heifer_1_Az1_22dec18_RD1_01_440.08954.08954.2	2019-12-06	APTLRARRL	E1B8U7	868.535
0.999999	1	Heifer_1_Az1_22dec18_RD1_01_440.08955.08955.3	18/64	SQSMFSAPSSISSMTMPSS	F1MU46	1790.75
0.999999	1	Heifer_1_Az1_22dec18_RD1_01_440.08956.08956.2	2020-09-01	SPVRRRRRSSASL	L8ICB6	1326.77
0.999999	1	Heifer_1_Az1_22dec18_RD1_01_440.08957.08957.3	16/56	DKQATDSGGGIYQYDNY	E1BIV7	1615.71
0.999999	1	Heifer_1_Az1_22dec18_RD1_01_440.08997.08997.3	17/48	TKVTTVASSQKSSQL	L8IRZ9	1349.72
0.999999	1	Heifer_1_Az1_22dec18_RD1_01_440.09006.09006.2	2020-10-01	TSAPATLESSGCS	E1BB79	1078.46
0.999999	1	Heifer_1_Az1_22dec18_RD1_01_440.09108.09108.2	2022-10-01	APAPSGLPPGPTGE	F1MYG1	1046.54
0.999999	1	Heifer_1_Az1_22dec18_RD1_01_440.09121.09121.2	2024-10-01	GSLPDVRQACLQMAL	Q95103	1503.72
0.999999	1	Heifer_1_Az1_22dec18_RD1_01_440.09136.09136.2	2016-08-01	LTLVPIQTKML	Q1JPJ2	1045.58
0.999999	1	Heifer_1_Az1_22dec18_RD1_01_440.09153.09153.3	20/72	LKKPPSAPDASAPALPNPPAL	F1N693	1824.97
0.999999	1	Heifer_1_Az1_22dec18_RD1_01_440.09201.09201.3	17/76	RRRQAVELNVVAIVNDTVGTMM	L8HS18	2184.17
0.999999	1	Heifer_1_Az1_22dec18_RD1_01_440.09223.09223.3	19/56	LQFTRFWIFSILYAIWW	L8HR93	1990.05
0.999999	1	Heifer_1_Az1_22dec18_RD1_01_440.09243.09243.3	21/72	ADGPLAVYGWGALPAENISLC	E1BMN9	1941.98
0.999999	1	Heifer_1_Az1_22dec18_RD1_01_440.09317.09317.3	14/56	KRSNHSKIIEDSDRSVK	P24275	1741.87
0.999999	1	Heifer_1_Az1_22dec18_RD1_01_440.09324.09324.3	15/48	EVEEEEKKIKQMFQL	Q08DW5	1664.84
0.999999	1	Heifer_1_Az1_22dec18_RD1_01_440.09344.09344.3	24/88	GLTTLAPGDMGPGAGGGPGLPPSLP	L8IVE3	2048.02
0.999999	1	Heifer_1_Az1_22dec18_RD1_01_440.09408.09408.3	17/56	DKKAPYEHLIIDGLFME	Q24JZ9	1789.94
0.999999	1	Heifer_1_Az1_22dec18_RD1_01_440.09412.09412.3	1944-10-01	PGVNVKLPTGQISG	F1MCK2	1211.69
0.999999	1	Heifer_1_Az1_22dec18_RD1_01_440.09453.09453.3	19/68	YPLVCAFFVALLPVWVMLAR	E1BAX4	2061.12
0.999999	1	Heifer_1_Az1_22dec18_RD1_01_440.09485.09485.3	14/44	-MAFLMKTMISNQV	E1BEG6	1461.67
0.999999	1	Heifer_1_Az1_22dec18_RD1_01_440.09497.09497.2	1930-12-01	AHSNLASIHKDSGNIPEA	A6QQD9	1717.84
0.999999	1	Heifer_1_Az1_22dec18_RD1_01_440.09514.09514.3	19/64	WHNECIMGADKGSLEPLSS	L8I8W5	1856.84
0.999999	1	Heifer_1_Az1_22dec18_RD1_01_440.09521.09521.2	2020-11-01	DAEVLILPKKHKK	A7YWH5	1274.81
0.999999	1	Heifer_1_Az1_22dec18_RD1_01_440.09556.09556.2	2018-09-01	LAQHKPRSILSK	F1MZ21	1135.65
0.999999	1	Heifer_1_Az1_22dec18_RD1_01_440.09564.09564.3	1948-11-01	QARKKYASYRAAAVL	P62285	1453.82
0.999999	1	Heifer_1_Az1_22dec18_RD1_01_440.09593.09593.3	19/52	ALSSALSGQSHLAIKD	L8HYZ0	1410.78
0.999999	1	Heifer_1_Az1_22dec18_RD1_01_440.09647.09647.3	23/76	SAQDSKMDYKRRFLLGGSKQKV	E1BGL2	2371.24
0.999999	1	Heifer_1_Az1_22dec18_RD1_01_440.09698.09698.3	23/92	PGPLQPPPAGKTDITASPGQGLLLAP	A3KMW6	2298.26
0.999999	1	Heifer_1_Az1_22dec18_RD1_01_440.09700.09700.2	13/32	QTKPSTAPASGSSLRHWNL	F1N4E4	1795.9
0.999999	1	Heifer_1_Az1_22dec18_RD1_01_440.09725.09725.3	20/76	YFGQPLIDPQETVLRVPVSRYQ	F1MPW8	2313.25
0.999999	1	Heifer_1_Az1_22dec18_RD1_01_440.09753.09753.3	27/108	GAPAIALVGCLSLAVELQAGAGGPGLAALV	Q2NL31	2559.41
0.999999	1	Heifer_1_Az1_22dec18_RD1_01_440.09763.09763.2	2020-10-01	LFVLMGCSVFMTA	F1MVR5	1306.58
0.999999	1	Heifer_1_Az1_22dec18_RD1_01_440.09768.09768.2	2028-10-01	MLKGGVGGAGAAPRKRG	F1N3C4	1393.83
0.999999	1	Heifer_1_Az1_22dec18_RD1_01_440.09816.09816.3	21/84	TSSTKSTSANFSSLSMTPFGGSSA	A7MB57	2166.97
0.999999	1	Heifer_1_Az1_22dec18_RD1_01_440.09877.09877.3	22/80	SVRILCEKIASAASSLQKVVLKN	L8I4J5	2312.36
0.999999	1	Heifer_1_Az1_22dec18_RD1_01_440.09926.09926.3	17/56	ELIKLIKDKRRDVTFRN	E1BAS6	1900.17
0.999999	1	Heifer_1_Az1_22dec18_RD1_01_440.09939.09939.3	1940-11-01	FHNPDRAYDAVQL	G3N0K2	1284.58
0.999999	1	Heifer_1_Az1_22dec18_RD1_01_440.09972.09972.3	17/60	QLKMDPVPGAQDQGTNRW	F1MG39	1725.85
0.999999	1	Heifer_1_Az1_22dec18_RD1_01_440.09979.09979.2	2022-12-01	VFIYFNSFLESFQG	F1MCX2	1540.72
0.999999	1	Heifer_1_Az1_22dec18_RD1_01_440.10015.10015.3	23/92	PLTPGSPLVGPLAVSQNGPLMPPMTG	F1MUB8	2389.24
0.999999	1	Heifer_1_Az1_22dec18_RD1_01_440.10017.10017.3	17/56	CYTSTDVPQMLSNMMGR	L8HPX2	1705.7
0.999999	1	Heifer_1_Az1_22dec18_RD1_01_440.10036.10036.2	2026-09-01	FILADDQGFRDVGYHG	E1BKH3	1604.76
0.999999	1	Heifer_1_Az1_22dec18_RD1_01_440.10037.10037.3	19/52	LQVTASDADDPTYGNS	A2VDQ6	1452.6
0.999999	1	Heifer_1_Az1_22dec18_RD1_01_440.10046.10046.2	2026-10-01	HEVAPPRLVMSIQDGL	F1MCX4	1526.78
0.999999	1	Heifer_1_Az1_22dec18_RD1_01_440.10058.10058.3	15/40	SWRPGRRGPSSGG	Q2KI76	1211.63
0.999999	1	Heifer_1_Az1_22dec18_RD1_01_440.10077.10077.2	2018-09-01	YSGADITNVCRD	F1MAX6	1091.5
0.999999	1	Heifer_1_Az1_22dec18_RD1_01_440.10099.10099.3	18/56	LFTVMPLSVLRSMISKV	A5D7V7	1723.94
0.999999	1	Heifer_1_Az1_22dec18_RD1_01_440.10219.10219.3	19/68	CTHQKSVQTSASAKYCSVFP	E1BMR9	2027.97
0.999999	1	Heifer_1_Az1_22dec18_RD1_01_440.10224.10224.2	13/26	AFPGAGIGGGVKPQKP	M5FMV4	1311.73
0.999999	1	Heifer_1_Az1_22dec18_RD1_01_440.10252.10252.2	2024-12-01	LPGNPGPPGQKGEPG	Q7SIB2	1230.6
0.999999	1	Heifer_1_Az1_22dec18_RD1_01_440.10268.10268.2	2028-12-01	PGIITDIGMKAVNEVFS	E1BPZ7	1605.84
0.999999	1	Heifer_1_Az1_22dec18_RD1_01_440.10354.10354.2	2028-11-01	SQASSLTTAEDLGSSCS	F1MUH9	1525.66
0.999999	1	Heifer_1_Az1_22dec18_RD1_01_440.10391.10391.3	16/72	SSATTVTSKAAPSWPESHSST	E1BE97	1929.91
0.999999	1	Heifer_1_Az1_22dec18_RD1_01_440.10432.10432.3	17/60	RFASQELLSANAISDQLL	L8IJA3	1705.85
0.999999	1	Heifer_1_Az1_22dec18_RD1_01_440.10482.10482.3	16/64	VTALDKDKGENAELMYTIE	L8IR07	1910.93
0.999999	1	Heifer_1_Az1_22dec18_RD1_01_440.10499.10499.2	2024-10-01	GGTVPGAAPTFFVIL	L8I1K9	1275.69
0.999999	1	Heifer_1_Az1_22dec18_RD1_01_440.10513.10513.3	17/76	GAIGPQGPSGAMGPPGLKGDRG	P42916	1861.95
0.999999	1	Heifer_1_Az1_22dec18_RD1_01_440.10515.10515.3	19/92	CLASNTAGDKSKSFSLNVLVSPIIAG	E1BE11	2431.33
0.999999	1	Heifer_1_Az1_22dec18_RD1_01_440.10532.10532.3	13/60	RRHQAGAMGEAQKSRKGL	G3MYZ2	1726.86
0.999999	1	Heifer_1_Az1_22dec18_RD1_01_440.10539.10539.3	13/60	EVSSSSPSPKEAHLPDVR	F6QJQ2	1635.81
0.999999	1	Heifer_1_Az1_22dec18_RD1_01_440.10570.10570.2	2018-10-01	YFTQGLGLNLEN	Q0VCP5	1090.57
0.999999	1	Heifer_1_Az1_22dec18_RD1_01_440.10608.10608.2	2020-10-01	AAVTSVSTSIVEH	A6QPR4	1091.57
0.999999	1	Heifer_1_Az1_22dec18_RD1_01_440.10664.10664.3	18/52	VSLTEHFLKFASVFQP	A7E369	1652.86
0.999999	1	Heifer_1_Az1_22dec18_RD1_01_440.10672.10672.3	16/60	KRYNQNRSLVQKLRMEER	Q3SZM1	2079.06
0.999999	1	Heifer_1_Az1_22dec18_RD1_01_440.10677.10677.2	2020-10-01	LSLANTLMSMTNA	L8IJ73	1197.54
0.999999	1	Heifer_1_Az1_22dec18_RD1_01_440.10693.10693.2	2016-08-01	PASGFFRSLMS	L8HM31	1014.5
0.999999	1	Heifer_1_Az1_22dec18_RD1_01_440.10725.10725.3	18/52	VLFVLFTVTGLFSMYF	F1MGH9	1636.86
0.999999	1	Heifer_1_Az1_22dec18_RD1_01_440.10755.10755.3	17/68	SLAKGALLPVSSAATSHSGH	F1MBK6	1665.9
0.999999	1	Heifer_1_Az1_22dec18_RD1_01_440.10788.10788.3	13/52	RMIWQEQSACIVMVTN	F1MME1	1726.77
0.999999	1	Heifer_1_Az1_22dec18_RD1_01_440.10841.10841.2	2016-09-01	SIELSPVQCRS	F1N3C9	1100.56
0.999999	1	Heifer_1_Az1_22dec18_RD1_01_440.10844.10844.2	2020-08-01	SIACTVPGGTLPA	F1N4C5	1084.56
0.999999	1	Heifer_1_Az1_22dec18_RD1_01_440.10877.10877.3	14/44	MMYEAELEHLQQQR	F1MHG6	1533.68
0.999999	1	Heifer_1_Az1_22dec18_RD1_01_440.10897.10897.3	16/80	TAKPARPQTRSPSPTLSYYSSGL	F1MQL7	2250.14
0.999999	1	Heifer_1_Az1_22dec18_RD1_01_440.10928.10928.3	16/72	LGHPGDVGQGGLVHSGPVGGL	F1MG71	1682.81
0.999999	1	Heifer_1_Az1_22dec18_RD1_01_440.10974.10974.3	16/64	SSFQEFLQSPPSPDRAGFM	G3N1T6	1908.9
0.999999	1	Heifer_1_Az1_22dec18_RD1_01_440.11042.11042.2	2026-11-01	KPENPPAETSAPKDIL	E1BCG0	1464.71
0.999999	1	Heifer_1_Az1_22dec18_RD1_01_440.11097.11097.3	17/60	VPLYKPLIITPLMIHLLK	F1MJU4	1874.15
0.999999	1	Heifer_1_Az1_22dec18_RD1_01_440.11108.11108.2	1932-10-01	PEAAGGGVGGGGSSAPSPA	G5E618	1313.58
0.999999	1	Heifer_1_Az1_22dec18_RD1_01_440.11200.11200.3	14/48	AHVEAVCIAWFTMEY	Q4ZHA6	1607.71
0.999999	1	Heifer_1_Az1_22dec18_RD1_01_440.11214.11214.3	22/100	APGPDGAPAKGDGPAALGAPGSLLAVPP	O18875	2252.18
0.999999	1	Heifer_1_Az1_22dec18_RD1_01_440.11220.11220.3	19/76	SLSDMPRSPMSTNSSVHTGSDV	F1MY77	2104.92
0.999999	1	Heifer_1_Az1_22dec18_RD1_01_440.11249.11249.3	24/76	DTPEGGFDAMLQAAVCESHIGW	L8HVT9	2104.92
0.999999	1	Heifer_1_Az1_22dec18_RD1_01_440.11289.11289.3	17/68	TFTHFQLRLRVPEGPGAHEE	F1MPK6	2090.08
0.999999	1	Heifer_1_Az1_22dec18_RD1_01_440.11309.11309.3	17/64	TFDPLPEPAVAPAARPSAT	Q0P5G7	1704.88
0.999999	1	Heifer_1_Az1_22dec18_RD1_01_440.11331.11331.3	17/80	SPEGPLSLSEGPSIGPEGGPGGA	E1BBJ2	1889.9
0.999999	1	Heifer_1_Az1_22dec18_RD1_01_440.11407.11407.2	2020-09-01	REVNNGLIIMNEF	L8IDS6	1260.6
0.999999	1	Heifer_1_Az1_22dec18_RD1_01_440.11453.11453.3	19/80	PPVVPVKHRTGSWKCKEGPGPGP	E1BKN0	2272.19
0.999999	1	Heifer_1_Az1_22dec18_RD1_01_440.11472.11472.3	19/64	ATGTFALTSLISANAVERL	E1BD54	1749.93
0.999999	1	Heifer_1_Az1_22dec18_RD1_01_440.11501.11501.2	2016-07-01	DMDSLSYLKKV	Q29RZ5	1099.56
0.999999	1	Heifer_1_Az1_22dec18_RD1_01_440.11557.11557.3	17/68	APGRPSTGTARPTVSSGPMP	E1BBR9	1770.87
0.999999	1	Heifer_1_Az1_22dec18_RD1_01_440.11558.11558.3	13/40	CRCLVRAPLVSDV	G3MWL0	1284.7
0.999999	1	Heifer_1_Az1_22dec18_RD1_01_440.11560.11560.2	13/24	ETFFVIADSSKAGLS	F1MZT1	1354.71
0.999999	1	Heifer_1_Az1_22dec18_RD1_01_440.11618.11618.2	2020-10-01	LKGKKFGPFVGDK	F1N790	1178.64
0.999999	1	Heifer_1_Az1_22dec18_RD1_01_440.11637.11637.3	16/52	HLIPVKDNLVDKIWTD	Q1JPJ2	1652.95
0.999999	1	Heifer_1_Az1_22dec18_RD1_01_440.11648.11648.3	15/56	LVVQVPPAIKTGLPDLS	E1B9K4	1545.91
0.999999	1	Heifer_1_Az1_22dec18_RD1_01_440.11725.11725.3	20/68	YMFRMDDFDVVDATMHGNAA	E1BKN0	2086.85
0.999999	1	Heifer_1_Az1_22dec18_RD1_01_440.11762.11762.3	19/72	YSAGILLAPPLVLFLLGLVMN	L8J3F2	1936.18
0.999999	1	Heifer_1_Az1_22dec18_RD1_01_440.11772.11772.2	2020-09-01	VVLNITATNRLLQ	Q14V39	1226.73
0.999999	1	Heifer_1_Az1_22dec18_RD1_01_440.11779.11779.3	17/72	KELHNSPHGPASEPSEKAKIL	A5PKG7	2027.01
0.999999	1	Heifer_1_Az1_22dec18_RD1_01_440.11814.11814.2	1934-10-01	DSWARGSRRPSSSEAVPGQE	E1BNE5	1913.95
0.999999	1	Heifer_1_Az1_22dec18_RD1_01_440.11849.11849.2	2028-11-01	RGSLESTLAHGLKNGMK	P17810	1513.76
0.999999	1	Heifer_1_Az1_22dec18_RD1_01_440.11861.11861.3	18/64	QGPGHRPKPQLREGISDPP	E1BI77	1839.97
0.999999	1	Heifer_1_Az1_22dec18_RD1_01_440.11907.11907.3	16/68	EASTAREPELGNLSVSDITS	L8I7T7	1858.93
0.999999	1	Heifer_1_Az1_22dec18_RD1_01_440.11918.11918.2	2026-09-01	NMSPSSGHQSPAGSAP	L8IXB4	1315.55
0.999999	1	Heifer_1_Az1_22dec18_RD1_01_440.11985.11985.2	2020-09-01	ALLTSVVFVGMMS	Q1JP63	1227.62
0.999999	1	Heifer_1_Az1_22dec18_RD1_01_440.12006.12006.3	1956-12-01	MQVRGLGARYNASQLHL	L8ILL2	1668.88
0.999999	1	Heifer_1_Az1_22dec18_RD1_01_440.12012.12012.2	2024-09-01	REAASFSNAASASAS	F1N4N9	1182.52
0.999999	1	Heifer_1_Az1_22dec18_RD1_01_440.12013.12013.3	22/60	SGCCITPTGYRAQRGGTS	E1BQ34	1753.8
0.999999	1	Heifer_1_Az1_22dec18_RD1_01_440.12036.12036.3	20/76	TAMSSSSTPQPQGPPPTVSQML	L8HWQ2	2029.91
0.999999	1	Heifer_1_Az1_22dec18_RD1_01_440.12050.12050.2	2022-10-01	EGIMTGPLLQSCCA	F1MJ69	1335.6
0.999999	1	Heifer_1_Az1_22dec18_RD1_01_440.12190.12190.3	16/64	TTAGILATLSHCIELMVKR	Q9GKI7	1855.99
0.999999	1	Heifer_1_Az1_22dec18_RD1_01_440.12227.12227.2	2020-08-01	RPDVCMADPEGLS	L8ITZ3	1202.49
0.999999	1	Heifer_1_Az1_22dec18_RD1_01_440.12239.12239.3	20/68	EQQKRLSSLSDPVSERRAGE	Q0VCF1	2013.07
0.999999	1	Heifer_1_Az1_22dec18_RD1_01_440.12247.12247.3	15/60	LTSAPVPSTTTRSLTACP	P08037	1648.81
0.999999	1	Heifer_1_Az1_22dec18_RD1_01_440.12259.12259.3	1948-12-01	SLLPPADPLRQANRL	E1BBV0	1459.83
0.999999	1	Heifer_1_Az1_22dec18_RD1_01_440.12305.12305.2	2024-08-01	SVVGNLGMVILTKVD	E1BPU4	1341.81
0.999999	1	Heifer_1_Az1_22dec18_RD1_01_440.12318.12318.3	15/76	SMKDWDKESDGPDGSRLGCGSD	Q3T062	2211.92
0.999999	1	Heifer_1_Az1_22dec18_RD1_01_440.12536.12536.2	2022-09-01	QMHHNAATAMAQRA	G3X7K5	1353.6
0.999999	1	Heifer_1_Az1_22dec18_RD1_01_440.12586.12586.3	16/64	RSTFVLSNLAEVVERVFTF	A5PJX0	1910.01
0.999999	1	Heifer_1_Az1_22dec18_RD1_01_440.12589.12589.3	16/60	LDLQVISPQPRSIGLIAG	Q08DK1	1705.97
0.999999	1	Heifer_1_Az1_22dec18_RD1_01_440.12634.12634.3	16/56	LSQLYGSSTSGHIVCRS	A7Z089	1650.78
0.999999	1	Heifer_1_Az1_22dec18_RD1_01_440.12665.12665.3	21/80	LGPPDTGMGDAASSDLNRASSAL	E1BFC1	1975.85
0.999999	1	Heifer_1_Az1_22dec18_RD1_01_440.12710.12710.3	18/56	SVNNNWMNIYSFVEDLV	E1BKZ4	1856.84
0.999999	1	Heifer_1_Az1_22dec18_RD1_01_440.12719.12719.2	2020-11-01	FCDMCNLAVHQEC	E1BPS1	1391.53
0.999999	1	Heifer_1_Az1_22dec18_RD1_01_440.12766.12766.3	1948-10-01	VAISGNHLISTNVLR	E1BIM3	1337.73
0.999999	1	Heifer_1_Az1_22dec18_RD1_01_440.12856.12856.3	17/56	CKGFFRRTIRLKLVYDK	Q9N129	1911.12
0.999999	1	Heifer_1_Az1_22dec18_RD1_01_440.12908.12908.3	14/60	RIMGVNPYILKKNMMLMT	F6RX10	1910.99
0.999999	1	Heifer_1_Az1_22dec18_RD1_01_440.12981.12981.3	22/76	SPSVAESPQGVTSVPTSMWSGQ	E1BP52	2002.93
0.999999	1	Heifer_1_Az1_22dec18_RD1_01_440.12983.12983.2	2024-09-01	GMSMGGAPAGPAGTG	L8J5S1	1135.46
0.999999	1	Heifer_1_Az1_22dec18_RD1_01_440.12988.12988.3	17/68	SDLTRHHRIHTGEKPYECKE	Q2KJ67	2276.12
0.999999	1	Heifer_1_Az1_22dec18_RD1_01_440.13064.13064.2	2018-11-01	AIASLHHLAALQ	A5PJT2	1044.61
0.999999	1	Heifer_1_Az1_22dec18_RD1_01_440.13079.13079.3	1944-11-01	LGLLESGFAAEMKS	L8HU19	1267.61
0.999999	1	Heifer_1_Az1_22dec18_RD1_01_440.13085.13085.3	22/64	HYSILMTRKICFQLMMASC	L8J462	2140.02
0.999999	1	Heifer_1_Az1_22dec18_RD1_01_440.13091.13091.3	1940-10-01	DLRTSHWEEAIQE	A7YWM8	1368.68
0.999999	1	Heifer_1_Az1_22dec18_RD1_01_440.13194.13194.3	17/84	ASAGAGGKETPADGKASVESGQAK	O18978	1973.93
0.999999	1	Heifer_1_Az1_22dec18_RD1_01_440.13233.13233.3	1944-11-01	LKEISSTSQTLLYT	Q8MJ08	1368.71
0.999999	1	Heifer_1_Az1_22dec18_RD1_01_440.13239.13239.2	1938-12-01	GFVLGAVSPAVVVPSMLLLQEG	E1BFC4	2084.16
0.999999	1	Heifer_1_Az1_22dec18_RD1_01_440.13275.13275.3	1936-11-01	PGSTCRDHEKEL	Q3SYW2	1217.51
0.999999	1	Heifer_1_Az1_22dec18_RD1_01_440.13287.13287.2	2026-11-01	AFPWHSRNRNYKAEFA	F1MPA1	1850.9
0.999999	1	Heifer_1_Az1_22dec18_RD1_01_440.13339.13339.3	13/44	RSAGGRKMSENSYS	E1BDU8	1285.57
0.999999	1	Heifer_1_Az1_22dec18_RD1_01_440.13340.13340.3	19/52	NLNNNMRRPSSPRKWY	E1BC74	1754.91
0.999999	1	Heifer_1_Az1_22dec18_RD1_01_440.13343.13343.2	2014-08-01	KVVKVTFDEQ	Q3T144	935.496
0.999999	1	Heifer_1_Az1_22dec18_RD1_01_440.13437.13437.3	17/48	DREAASSALSSLGHV	L8IXB4	1284.64
0.999999	1	Heifer_1_Az1_22dec18_RD1_01_440.13448.13448.3	18/52	PGPSGEKGETGDVGPM	Q32S24	1285.58
0.999999	1	Heifer_1_Az1_22dec18_RD1_01_440.13472.13472.2	2019-12-08	LCHLAFGDL	E1B8L2	818.338
0.999999	1	Heifer_1_Az1_22dec18_RD1_01_440.13513.13513.2	2019-12-07	SPTVLHKMS	E1BGB9	824.458
0.999999	1	Heifer_1_Az1_22dec18_RD1_01_440.13537.13537.3	16/56	PMSLPGASTASPGAAAY	Q9BE97	1287.61
0.999999	1	Heifer_1_Az1_22dec18_RD1_01_440.13750.13750.3	1936-12-01	SPRDLNDLPEYT	F1MPV6	1230.59
0.999999	1	Heifer_1_Az1_22dec18_RD1_01_440.13763.13763.3	13/36	RFIMPPDKHHMS	L8I760	1267.58
0.999999	1	Heifer_1_Az1_22dec18_RD1_01_440.13801.13801.3	1940-11-01	FAIDIFPVTNKDF	Q58CP2	1231.64
0.999999	1	Heifer_1_Az1_22dec18_RD1_01_440.13889.13889.3	14/36	ARCPDCSADRPG	E1B6Y0	1232.5
0.999999	1	Heifer_1_Az1_22dec18_RD1_01_440.13954.13954.3	1940-11-01	PVPKSILTSMKKV	Q3T099	1230.74
0.999999	1	Heifer_1_Az1_22dec18_RD1_01_440.13999.13999.2	2022-07-01	PTGGGGGGGSGGTR	A7E305	820.331
0.999999	1	Heifer_1_Az1_22dec18_RD1_01_440.14488.14488.3	1944-11-01	PSVSHAARSESSDL	F1MSU8	1231.54
0.999999	1	Heifer_1_Az1_22dec18_RD1_01_440.14501.14501.3	14/44	EPEGAGAKSPMCQK	G5E5G8	1231.53
0.999999	1	Heifer_1_Az1_22dec18_RD1_01_440.14645.14645.3	1940-09-01	SQPEGSLQSWLSC	E1BA80	1230.59
0.999999	1	Heifer_1__442.01203.01203.3	18/52	LPSTMAAAAASGLSPL	E1BE01	1230.59
0.999999	1	Heifer_1__442.02625.02625.3	1940-11-01	DLVGVNKDSYLIL	D0MU42	1219.68
0.999999	1	Heifer_1__442.02667.02667.3	13/48	GPRGPTGPPGAKGQE	E1BG60	1218.65
0.999999	1	Heifer_1__442.02693.02693.3	1944-11-01	EPARKRAAPPPGQS	Q17QK5	1244.71
0.999999	1	Heifer_1__442.02698.02698.3	1944-09-01	AVFANCAGMLVVVF	A5D9A7	1294.64
0.999999	1	Heifer_1__442.02752.02752.3	1940-12-01	GWEYAFEGTAGRF	Q3T110	1285.57
0.999999	1	Heifer_1__442.02766.02766.3	1944-10-01	LAHIKYAAKHGVRL	F1N7A5	1349.77
0.999999	1	Heifer_1__442.02806.02806.2	2016-07-01	SQRESGPDGAS	L8I754	915.405
0.999999	1	Heifer_1__442.02856.02856.3	13/48	LGSLTHSRREALEKT	A5D7D1	1482.79
0.999999	1	Heifer_1__442.02936.02936.3	1968-12-01	DLQSAVSVLALTPQGNGTVT	E1BPQ9	1753.96
0.999999	1	Heifer_1__442.02978.02978.3	13/64	PPGDSAPGNRSGPRHINDS	G3MXX5	1745.82
0.999999	1	Heifer_1__442.03002.03002.3	20/64	FCSISTRKLAAHSFGASMA	A6QLH5	1838.88
0.999999	1	Heifer_1__442.03037.03037.3	13/56	LTLVWQTPVAKFDRYRL	L8I7T7	1879.01
0.999999	1	Heifer_1__442.04660.04660.3	1940-10-01	DEKPPEEPGEARK	L8IIN6	1237.59
0.999999	1	Heifer_1__442.04750.04750.2	2014-05-01	QAMVLSTGFS	E1BEZ1	824.41
0.999999	1	Heifer_1__442.04833.04833.2	2014-08-01	VYPGPARPAS	A6QLL3	827.429
0.999999	1	Heifer_1__442.04895.04895.3	1940-11-01	LYNSVLKQVISSD	L8HXZ5	1236.67
0.999999	1	Heifer_1__442.04903.04903.2	2022-06-01	GGPAAGGGGPGAGA	G3MX15	824.378
0.999999	1	Heifer_1__442.04931.04931.3	1948-11-01	VTSAPGTSEPTGSFP	L8I679	1237.55
0.999999	1	Heifer_1__442.04950.04950.3	16/36	PAPCSELVRCFN	L8IUH1	1237.56
0.999999	1	Heifer_1__442.04998.04998.2	2014-06-01	GSGIRSPPLP	L8J176	825.471
0.999999	1	Heifer_1__442.05049.05049.3	13/48	AASRPSGQEAAPPAG	F1MSQ8	1237.61
0.999999	1	Heifer_1__442.05125.05125.2	2016-08-01	PGTPVATFSAR	A6QP71	849.423
0.999999	1	Heifer_1__442.05159.05159.2	2014-06-01	QPSLQSSMTY	A5PJL1	849.39
0.999999	1	Heifer_1__442.05321.05321.3	1940-09-01	ESAHDSPRDETLQ	A5D794	1226.55
0.999999	1	Heifer_1__442.05460.05460.3	13/52	CRHTRRSSMSVEAETT	Q5MD62	1645.8
0.999999	1	Heifer_1__442.05523.05523.3	1944-10-01	GITISCESPSSASR	F1MFS5	1237.55
0.999999	1	Heifer_1__442.05919.05919.2	2018-06-01	ALPGGLGCGSGS	E1BGB2	873.402
0.999999	1	Heifer_1__442.06222.06222.1	2014-07-01	WDTVPLDGST	G3N342	802.371
0.999999	1	Heifer_1__442.06275.06275.2	2016-07-01	LTAFGIPGRCG	A5PK33	977.475
0.999999	1	Heifer_1__442.06279.06279.1	2016-08-01	TNTATTAGPAP	F1MY28	802.382
0.999999	1	Heifer_1__442.06336.06336.2	2026-08-01	EKRVEAAMPPNAYDES	Q58D05	1605.75
0.999999	1	Heifer_1__442.06352.06352.1	2014-08-01	DRGMGPPTAA	A7Z032	801.38
0.999999	1	Heifer_1__442.06393.06393.1	2016-09-01	LVRGDAAGSAG	A7MB34	802.393
0.999999	1	Heifer_1__442.06517.06517.2	2014-06-01	QHAEANGVDG	L8IU67	811.346
0.999999	1	Heifer_1__442.06551.06551.3	1948-10-01	LAGSTGLAKETFGSL	E1BJV7	1224.6
0.999999	1	Heifer_1__442.06626.06626.3	21/76	MLSLVSTGDCPFIVCMSYAFHT	P21146	2319.04
0.999999	1	Heifer_1__442.06677.06677.3	1932-09-01	RRKQRLHARYV	L8HQI3	1226.71
0.999999	1	Heifer_1__442.06717.06717.2	1930-09-01	TTGLGRQTVAAAAAAAST	G3X8E7	1414.75
0.999999	1	Heifer_1__442.06719.06719.3	1940-10-01	GEGGRKNSSNFKK	Q32PJ8	1222.61
0.999999	1	Heifer_1__442.06722.06722.2	2022-08-01	QDCHSHSRTSLQSS	Q58DT0	1413.61
0.999999	1	Heifer_1__442.06753.06753.2	2022-09-01	KGLPEMLGVPMQQL	L8I7K5	1314.63
0.999999	1	Heifer_1__442.06807.06807.3	18/64	PCAICIEVLGARHLPKNGR	P08487	1906.99
0.999999	1	Heifer_1__442.06970.06970.3	1948-11-01	LSFKITQTDLTMLKL	L8J0W5	1540.82
0.999999	1	Heifer_1__442.06971.06971.3	18/52	KKIRSSPREAKNKRRS	Q29S11	1725.02
0.999999	1	Heifer_1__442.06988.06988.2	2020-09-01	TIYSTIQAQASAS	L8I2W1	1151.58
0.999999	1	Heifer_1__442.07096.07096.3	19/64	LHRSQQQSVQTLLGSLVEK	E1BNN6	1909
0.999999	1	Heifer_1__442.07108.07108.3	18/56	SYRDVTQFEGKRISFYK	Q1JP73	1907.95
0.999999	1	Heifer_1__442.07210.07210.3	14/52	LNVDGLIGVAFVDMLR	Q32PF2	1477.75
0.999999	1	Heifer_1__442.07217.07217.2	2018-08-01	LRPGQPGLPPFL	Q3SX44	1064.58
0.999999	1	Heifer_1__442.07240.07240.2	2020-10-01	ESAEGETDHSGYT	Q0P568	1151.44
0.999999	1	Heifer_1__442.07263.07263.3	16/64	EASADMQADFQREAALMAE	E1BKP7	1856.8
0.999999	1	Heifer_1__442.07266.07266.3	19/64	FPNSNDLLSKRFGQFISST	E1BPS3	1908.97
0.999999	1	Heifer_1__442.07275.07275.3	18/68	PEPSAPVAPSPSVIAPVRAV	G3X7J5	1743.95
0.999999	1	Heifer_1__442.07279.07279.3	23/92	SYQAPGPGDGGTASLVGSNMFPNQYR	F1MBB0	2427.08
0.999999	1	Heifer_1__442.07307.07307.2	2022-11-01	QTHTTPVLLAHGER	P56701	1274.66
0.999999	1	Heifer_1__442.07310.07310.3	17/76	PAASVPTPAPSPGSLPQPSSIY	L8HVG8	1859.96
0.999999	1	Heifer_1__442.07403.07403.3	13/64	LLLQNDHNADVQSKSGFTP	G3N3N0	1872.9
0.999999	1	Heifer_1__442.07441.07441.2	2026-10-01	PSASSGKMLLPQCGTF	L8IEL0	1451.67
0.999999	1	Heifer_1__442.07468.07468.2	2018-06-01	QGNFSSSVTSTL	L8J235	985.435
0.999999	1	Heifer_1__442.07495.07495.2	2022-10-01	SKPPLINGLYANKT	E1BAU3	1326.77
0.999999	1	Heifer_1__442.07568.07568.3	21/80	YVFILSTVLRIPSAEGKQKAFST	L8I7S3	2290.3
0.999999	1	Heifer_1__442.07581.07581.2	1930-10-01	PGIRGIPGLPGPPGTPGP	Q2KIT0	1441.8
0.999999	1	Heifer_1__442.07604.07604.2	2024-09-01	TSSGSPPGLAAVPVE	Q2KIS6	1137.6
0.999999	1	Heifer_1__442.07640.07640.3	16/56	VSMKSPIFGPEEVSSVE	F1MR22	1592.78
0.999999	1	Heifer_1__442.07682.07682.2	2020-08-01	VKAVASVLGRSNP	Q5EA59	1100.63
0.999999	1	Heifer_1__442.07684.07684.2	2028-12-01	WNKDPGATPTSEGPMEG	Q27969	1529.67
0.999999	1	Heifer_1__442.07707.07707.2	2020-10-01	LHMNPAERLTCEQ	A6QLF0	1356.59
0.999999	1	Heifer_1__442.07716.07716.3	20/96	PVPAGEPQKAGGGAGSGGVGTASGPAV	A5D7M4	2035.99
0.999999	1	Heifer_1__442.08014.08014.2	2020-10-01	KYWSFSISPSHEY	Q58CX2-2	1338.59
0.999999	1	Heifer_1__442.08059.08059.2	2016-09-01	VPQLYSFLRRP	L8ILZ3	1178.66
0.999999	1	Heifer_1__442.08118.08118.2	2024-11-01	SASRSGPGGSGSGGR	E1BHL0	1032.46
0.999999	1	Heifer_1__442.08143.08143.3	1956-12-01	DSDSFNQGPVVVDPYEE	G3MXM2	1651.74
0.999999	1	Heifer_1__442.08158.08158.3	22/64	KLYCNLEKEDLSESSQSSM	F1MLX5	1987.87
0.999999	1	Heifer_1__442.08169.08169.3	15/64	LMQVEREKAILLANLQESQ	F1ML98	1987.04
0.999999	1	Heifer_1__442.08185.08185.2	2018-07-01	LHVGSNVDGFGL	E1BPS3	987.441
0.999999	1	Heifer_1__442.08207.08207.2	2024-10-01	LLKRAVAGDASESAL	Q08DA1	1273.66
0.999999	1	Heifer_1__442.08262.08262.2	2028-09-01	LSAATTFEPLEPVKDTD	A5PJZ5	1604.79
0.999999	1	Heifer_1__442.08269.08269.3	16/68	AENSDASSTSTLNSSASQEE	F1MJN1	1813.74
0.999999	1	Heifer_1__442.08276.08276.3	1944-11-01	KAFVHMPTLPNLDF	E1BFW7	1353.68
0.999999	1	Heifer_1__442.08311.08311.3	14/48	RLSKRMTASSMMGEN	L8I498	1443.65
0.999999	1	Heifer_1__442.08341.08341.3	15/60	LLSCSRNLHNLPTQVSAL	L8J333	1795.9
0.999999	1	Heifer_1__442.08357.08357.3	14/56	SKVSAYAGMLSSRYTTD	L8ISR9	1649.81
0.999999	1	Heifer_1__442.08401.08401.2	2018-08-01	NYMGNSFPGYSH	Q08D88	1137.44
0.999999	1	Heifer_1__442.08485.08485.3	15/60	PPPPPVARPVPLPMPDSK	F1MCB7	1681.89
0.999999	1	Heifer_1__442.08495.08495.2	13/22	DLAHTTLAYGLSQD	Q2T9M1	1273.67
0.999999	1	Heifer_1__442.08504.08504.3	19/80	LRGISSAQGKQAAFSTCMSHLSV	F1MC01	2239.05
0.999999	1	Heifer_1__442.08586.08586.3	15/52	LKDTCGANAKQSRDCF	P61283	1609.69
0.999999	1	Heifer_1__442.08590.08590.2	2018-08-01	SFTAWDSGSAAP	Q645M6	1011.43
0.999999	1	Heifer_1__442.08594.08594.2	2016-07-01	QRLDRHGFVSR	F1MBR1	1085.57
0.999999	1	Heifer_1__442.08706.08706.2	2020-07-01	RTGKAETACRPAT	G3N1E4	1160.56
0.999999	1	Heifer_1__442.08752.08752.3	13/56	QLETVLEGVMTQVDAMR	F1N5R3	1650.78
0.999999	1	Heifer_1__442.08769.08769.3	25/72	LDLDQQTLPGVAHQVVEQMVL	F1N4L1	2106.04
0.999999	1	Heifer_1__442.08795.08795.3	1940-10-01	FYLFYAVTLALLL	A9Q1J9	1285.73
0.999999	1	Heifer_1__442.08802.08802.2	1930-09-01	LVKNEKAAKVVILKKATE	F1MS90	1739.1
0.999999	1	Heifer_1__442.08858.08858.2	2026-10-01	GNPFDHFSAGESGLHE	F1N5D2	1513.66
0.999999	1	Heifer_1__442.08879.08879.2	2018-09-01	PRQPGLMAQMAT	Q3ZCI0	1101.54
0.999999	1	Heifer_1__442.08880.08880.3	15/68	FLPNQHIAGQAGPGHGSTQE	L8J5V8	1768.86
0.999999	1	Heifer_1__442.08891.08891.2	2022-09-01	VGPYKCKQCDIVTL	F1MG51	1467.68
0.999999	1	Heifer_1__442.08902.08902.3	18/64	LRPPTPSPKTSDTGFEMRC	F1N628	1902.93
0.999999	1	Heifer_1__442.08904.08904.2	2028-12-01	PVGALLGPGAERARMGS	B2XBK5	1469.78
0.999999	1	Heifer_1__442.08918.08918.2	2022-09-01	AGYCSFHSPMVCRL	O18970	1499.61
0.999999	1	Heifer_1__442.08968.08968.2	2020-08-01	GAHMNKGMGHKFL	Q3MHG6	1272.59
0.999999	1	Heifer_1__442.08982.08982.2	2022-10-01	VFVPPHPGISGGLG	G5E618	1176.63
0.999999	1	Heifer_1__442.08991.08991.3	17/68	RGGKKGNPSGKNVMVEPHRH	F1MM59	1906.98
0.999999	1	Heifer_1__442.09069.09069.2	2016-08-01	NNSVDTHACMK	E1BF25	1033.4
0.999999	1	Heifer_1__442.09092.09092.3	17/72	ALNLAALDCAEETNSAVCRDF	A6QQA8	2120.95
0.999999	1	Heifer_1__442.09116.09116.3	16/68	LAPGSSRPGLGQTENLGAVE	L8HYR4	1709.87
0.999999	1	Heifer_1__442.09117.09117.2	2018-08-01	PPPPPGLSSSGV	Q2TA49	894.445
0.999999	1	Heifer_1__442.09171.09171.2	2016-06-01	AFVTMPNVIGS	L8I4R1	992.5
0.999999	1	Heifer_1__442.09285.09285.3	13/52	LPGTPQIDGLSVSFQF	F1MYL5	1444.72
0.999999	1	Heifer_1__442.09317.09317.3	1944-08-01	KLVSVFYAMVTPML	E1BHU8	1388.67
0.999999	1	Heifer_1__442.09331.09331.2	2014-10-01	RMYRQQRRHQ	P79393	1189.59
0.999999	1	Heifer_1__442.09341.09341.3	19/52	RFRYSGKTEYQTTKTN	Q58CU2	1708.84
0.999999	1	Heifer_1__442.09342.09342.2	2026-09-01	EPPAGAFPGFPSPPAP	F1MR40	1308.65
0.999999	1	Heifer_1__442.09367.09367.3	18/60	FFDWMASNGTQSLPTDVM	F1N1Q8	1783.77
0.999999	1	Heifer_1__442.09391.09391.2	2018-08-01	LMVSARSSLPRA	A2VE38	1118.59
0.999999	1	Heifer_1__442.09400.09400.3	14/60	LFPVGIYSPESISMVENA	L8INE3	1783.83
0.999999	1	Heifer_1__442.09419.09419.2	2026-12-01	HEFGLTGASDTYSLCE	Q8TEU7	1519.65
0.999999	1	Heifer_1__442.09477.09477.2	1930-10-01	GRTPAGPVAVSTSGSGRH	F6QT88	1498.79
0.999999	1	Heifer_1__442.09608.09608.3	16/64	SLGTQGRLCNKTSEGMDGC	L8IZR5	1838.83
0.999999	1	Heifer_1__442.09647.09647.2	2028-09-01	AEPQPRGGGGGGCGWAP	E1BN37	1441.62
0.999999	1	Heifer_1__442.09717.09717.2	2018-09-01	KSEVATIDRRRK	L8I953	1201.65
0.999999	1	Heifer_1__442.09788.09788.2	2024-12-01	DTGAMNQGGKGFGVE	E1BH40	1238.57
0.999999	1	Heifer_1__442.09846.09846.3	1948-12-01	MRVRRRLKRMHVSAT	F1MM80	1680
0.999999	1	Heifer_1__442.09886.09886.2	2024-10-01	EPRGVGNKGGVVLRG	G3MXS3	1307.78
0.999999	1	Heifer_1__442.09909.09909.3	20/72	GGNFGGGGPPGLGGLFQAGMP	F6QPK8	1705.79
0.999999	1	Heifer_1__442.09912.09912.2	2018-07-01	PLAAAPILYLKG	G3N1W4	1071.67
0.999999	1	Heifer_1__442.09997.09997.3	13/64	WAGAVITGFRNKTKASLAH	Q8LTZ5	1703.97
0.999999	1	Heifer_1__442.10012.10012.2	2020-08-01	VKAMKSTTPGSVS	F1MM31	1121.58
0.999999	1	Heifer_1__442.10071.10071.3	14/64	PHSPLPGHLGSSPLDSPRN	E1BK33	1752.89
0.999999	1	Heifer_1__442.10080.10080.3	16/52	DEEEGDEQQRLLNTPR	F1MJQ9	1656.76
0.999999	1	Heifer_1__442.10105.10105.2	2020-10-01	EHVFRHAAQELFG	A4FV58	1353.69
0.999999	1	Heifer_1__442.10181.10181.3	15/60	LRAEKERSLVDGKSQEKE	Q32KY1	1858.99
0.999999	1	Heifer_1__442.10200.10200.3	15/64	AEFTAKIALLEEAKKKKEE	Q32LP2	1975.14
0.999999	1	Heifer_1__442.10229.10229.3	14/56	HGVEGGVYGVDGKLLQL	E1BJT6	1489.78
0.999999	1	Heifer_1__442.10260.10260.3	17/60	RNVDYLLIHGTADDNVHF	A5D7B7	1794.85
0.999999	1	Heifer_1__442.10315.10315.2	2018-08-01	PMPDDSVEKVSP	E1BGZ9	1121.49
0.999999	1	Heifer_1__442.10346.10346.2	2016-10-01	CCLGVHHRQED	L8I5J5	1134.54
0.999999	1	Heifer_1__442.10367.10367.2	13/22	PPAETPAAVPPGEQ	L8IUA3	1134.56
0.999999	1	Heifer_1__442.10370.10370.3	1952-12-01	LRLRDNNKPINVLTGL	L8I541	1608.91
0.999999	1	Heifer_1__442.10442.10442.3	13/44	DMSRRYGFAALKYL	E1BDI0	1477.75
0.999999	1	Heifer_1__442.10482.10482.2	2024-08-01	PVQANSSSGKTAGAP	L8J3M2	1176.57
0.999999	1	Heifer_1__442.10483.10483.2	2024-10-01	GLGVKEQGIQDPIKG	A8E648	1423.8
0.999999	1	Heifer_1__442.10496.10496.3	14/56	LGAWLLTANGSEMHKHV	E1B8T2	1650.79
0.999999	1	Heifer_1__442.10516.10516.3	16/60	VGSSLLVMNATDLDTGFN	L8IG16	1655.77
0.999999	1	Heifer_1__442.10542.10542.3	16/72	PMSVQPSGLGQPGATALLPVV	O97887	1837.96
0.999999	1	Heifer_1__442.10549.10549.3	14/64	CQGDGGTPLVCNGLAHGVA	G3N2H4	1650.78
0.999999	1	Heifer_1__442.10605.10605.2	2022-10-01	FFSTLVLLLSITIF	F1N4S9	1318.81
0.999999	1	Heifer_1__442.10719.10719.3	17/60	LFYSISGRGVDKEPLNLF	Q28060	1793.93
0.999999	1	Heifer_1__442.10725.10725.3	23/100	PLVSHHPLGGDEPGQTQASQVLKDPSLS	L8IWN7	2709.37
0.999999	1	Heifer_1__442.10736.10736.2	2022-11-01	VFSSNGTLVDRYRK	A6QQ07	1413.7
0.999999	1	Heifer_1__442.10772.10772.2	2024-10-01	TSLASKAQTQKHGIT	A5D785	1367.75
0.999999	1	Heifer_1__442.10794.10794.2	2026-09-01	SEVVLAAAAAGAAVGK	A5PJI8	1168.65
0.999999	1	Heifer_1__442.10822.10822.3	18/64	DTAGNASYIYDLIRRTMET	F1MMW5	1988.96
0.999999	1	Heifer_1__442.10829.10829.3	20/72	LEEHQKPPVSIKQERCDPESV	E1BFH3	2292.08
0.999999	1	Heifer_1__442.10855.10855.2	2016-08-01	FCAFYKMMSTR	E1BNT8	1169.46
0.999999	1	Heifer_1__442.10988.10988.3	13/44	TVTINDSVSDLPKM	L8I6U2	1286.67
0.999999	1	Heifer_1__442.11129.11129.3	13/44	SSTGPEEVALCSSR	F1N0Y1	1235.53
0.999999	1	Heifer_1__442.11236.11236.3	15/44	RRAAGSDVDIDMAF	E1BB91	1235.55
0.999999	1	Heifer_1__442.11288.11288.3	17/52	PTSGAPTGPGPTPTPP	E1BQ37	1236.6
0.999999	1	Heifer_1__442.11383.11383.2	2019-12-06	LYSCGSSYG	F1N1D4	822.285
0.999999	1	Heifer_1__442.11455.11455.2	2019-12-06	SAVWGTEYV	G3X7K5	824.37
0.999999	1	Heifer_1__442.11469.11469.3	1948-12-01	RRTHAGKSGAPPSAA	A6QR00	1235.64
0.999999	1	Heifer_1__442.11597.11597.2	2014-07-01	SQGSVPEPLN	Q5E9J8	825.423
0.999999	1	Heifer_1__442.11655.11655.3	1948-11-01	EPVTDSGDRPGAPAA	Q32LF9	1238.59
0.999999	1	Heifer_2_Az1_22dec18_RD2_01_444.00390.00390.3	19/80	RPVTSNTAVLTTGLDLLDLSEPV	F1MSB4	2155.13
0.999999	1	Heifer_2_Az1_22dec18_RD2_01_444.00619.00619.2	2024-07-01	PGVGMPGAGMPSAGG	F1MND5	1119.47
0.999999	1	Heifer_2_Az1_22dec18_RD2_01_444.02190.02190.2	2022-10-01	AGIVQEDVQPPGLK	F1MDB2	1250.65
0.999999	1	Heifer_2_Az1_22dec18_RD2_01_444.02192.02192.2	2022-10-01	HLAVVGLFYGTVIA	E1BPI0	1250.73
0.999999	1	Heifer_2_Az1_22dec18_RD2_01_444.02204.02204.2	2022-09-01	GVLLGAVIFGYLSD	Q17QN9	1250.73
0.999999	1	Heifer_2_Az1_22dec18_RD2_01_444.02208.02208.2	2026-11-01	PGTLPSGDAGLPAPVT	F1MJY3	1250.65
0.999999	1	Heifer_2_Az1_22dec18_RD2_01_444.02220.02220.2	2022-12-01	AREPGTASPLNLPE	A0A0U2EU52	1250.66
0.999999	1	Heifer_2_Az1_22dec18_RD2_01_444.02224.02224.2	16/28	TSPTPGGAGGGQRGPGT	L8IK78	1251.6
0.999999	1	Heifer_2_Az1_22dec18_RD2_01_444.02232.02232.2	2020-10-01	AVGEPAVMECMPP	E1BE71	1250.5
0.999999	1	Heifer_2_Az1_22dec18_RD2_01_444.02240.02240.2	2020-09-01	AVGEPAVMECMPP	E1BE71	1250.5
0.999999	1	Heifer_2_Az1_22dec18_RD2_01_444.02258.02258.2	2024-07-01	KDVDGKCHSLTASYV	A6QLJ0	1451.64
0.999999	1	Heifer_2_Az1_22dec18_RD2_01_444.02375.02375.3	15/64	SPTKDQESDSEEPQASDPE	F1MIH4	1858.77
0.999999	1	Heifer_2_Az1_22dec18_RD2_01_444.02445.02445.3	18/80	FPGVAAAAATAAAATGRLPRPSP	A5PKC7	1876.03
0.999999	1	Heifer_2_Az1_22dec18_RD2_01_444.02451.02451.3	19/56	PKPTIWAEPGSVVPSGT	G3X7F8	1523.8
0.999999	1	Heifer_2_Az1_22dec18_RD2_01_444.02607.02607.2	18/30	PGEPGLPGPPGLLGLPGL	L8HPG1	1426.78
0.999999	1	Heifer_2_Az1_22dec18_RD2_01_444.02632.02632.2	1940-11-01	DILADCKPLAACAPYSSSGQPAA	L8I484	2176.03
0.999999	1	Heifer_2_Az1_22dec18_RD2_01_444.02644.02644.3	25/84	RSHPRGDSHHGTPGAARKAPAGLS	F1MG74	2176.1
0.999999	1	Heifer_2_Az1_22dec18_RD2_01_444.02661.02661.3	22/72	FYVLTLIGNILIVITIIDDHH	F1MDS8	2137.24
0.999999	1	Heifer_2_Az1_22dec18_RD2_01_444.02662.02662.2	2022-10-01	LGDPAGGSTPPARQ	Q9MZL7	1081.52
0.999999	1	Heifer_2_Az1_22dec18_RD2_01_444.02666.02666.2	13/28	RGGQVPNGLPRAPPAPV	A4FV33	1426.77
0.999999	1	Heifer_2_Az1_22dec18_RD2_01_444.02682.02682.2	14/30	PGEPGLPGPPGLLGLPGL	L8HPG1	1426.78
0.999999	1	Heifer_2_Az1_22dec18_RD2_01_444.02687.02687.2	13/30	PGEPGLPGPPGLLGLPGL	L8HPG1	1426.78
0.999999	1	Heifer_2_Az1_22dec18_RD2_01_444.02704.02704.3	20/84	LGKVGISRRMPPPANLPSLKAENK	G3X6B3	2347.28
0.999999	1	Heifer_2_Az1_22dec18_RD2_01_444.02742.02742.3	22/84	PVVVTETPEPTMTSGVYRPPGARL	E1BEM3	2343.19
0.999999	1	Heifer_2_Az1_22dec18_RD2_01_444.02747.02747.2	1932-11-01	SPSGEPAQPSNSSWPPSEN	F1N1Y7	1752.76
0.999999	1	Heifer_2_Az1_22dec18_RD2_01_444.02758.02758.3	18/80	QEQDHVGGGFDSSEAFVGSMAGL	E1B8G2	2098.85
0.999999	1	Heifer_2_Az1_22dec18_RD2_01_444.02770.02770.2	14/42	QKGRQGDPGIEGPIGFPGPKGVPG	Q1JQB0	2159.15
0.999999	1	Heifer_2_Az1_22dec18_RD2_01_444.02788.02788.2	1940-12-01	LSIALGTLFYLLQAVSGESGYAE	L8I241	2159.11
0.999999	1	Heifer_2_Az1_22dec18_RD2_01_444.02828.02828.3	13/44	ESGDWINGYGLSRN	G3X778	1323.62
0.999999	1	Heifer_2_Az1_22dec18_RD2_01_444.02836.02836.3	20/48	SEAQRSSSLVAQLRA	E1BLG9	1443.78
0.999999	1	Heifer_2_Az1_22dec18_RD2_01_444.02855.02855.3	19/76	PPPPPSGTPDAGLWSPSPGRRR	P55106	2028.02
0.999999	1	Heifer_2_Az1_22dec18_RD2_01_444.02893.02893.3	1948-12-01	TPARLADAPGGHPRA	F1MDR1	1313.7
0.999999	1	Heifer_2_Az1_22dec18_RD2_01_444.02917.02917.2	2020-12-01	SRLATTAFCGSYA	A4FV52	1245.58
0.999999	1	Heifer_2_Az1_22dec18_RD2_01_444.02997.02997.3	20/96	GSPASYHGSPEASLCPQHRTGPLWGQS	F1MYK3	2719.26
0.999999	1	Heifer_2_Az1_22dec18_RD2_01_444.03005.03005.3	24/96	TTGMLAGVKMSHAATSAFCRSIKLQCE	F1MKT7	2740.33
0.999999	1	Heifer_2_Az1_22dec18_RD2_01_444.03015.03015.3	19/96	GGSPNYKDRRGLTPLFHTAMVGGDPRC	L8IDA1	2741.38
0.999999	1	Heifer_2_Az1_22dec18_RD2_01_444.03027.03027.2	2024-11-01	DSAGAETASALLSRV	L8IZU1	1232.64
0.999999	1	Heifer_2_Az1_22dec18_RD2_01_444.03032.03032.2	14/34	SGPQASCWAPGISVGTQVPF	Q0II92	1810.87
0.999999	1	Heifer_2_Az1_22dec18_RD2_01_444.03033.03033.3	13/56	SPLSSGSAPTLPTGSGK	L8I547	1327.66
0.999999	1	Heifer_2_Az1_22dec18_RD2_01_444.03046.03046.2	14/34	SGPQASCWAPGISVGTQVPF	Q0II92	1810.87
0.999999	1	Heifer_2_Az1_22dec18_RD2_01_444.03061.03061.2	1932-10-01	GTGQAAVPAVRYTNPILYL	F1MIP7	1832.98
0.999999	1	Heifer_2_Az1_22dec18_RD2_01_444.03075.03075.3	1944-12-01	WCLVAIVETIMPAD	A6QP29	1331.68
0.999999	1	Heifer_2_Az1_22dec18_RD2_01_444.03094.03094.2	1932-11-01	LAVGIHLLLLMFEVLVCDR	Q08DE2	1941.05
0.999999	1	Heifer_2_Az1_22dec18_RD2_01_444.03102.03102.2	17/36	LSSGSDGSSPLMSSAVQLNGS	L8IYF8	1795.79
0.999999	1	Heifer_2_Az1_22dec18_RD2_01_444.03104.03104.2	15/30	PPTKAVDPIDAPKVIMKT	F1N757	1737.97
0.999999	1	Heifer_2_Az1_22dec18_RD2_01_444.03107.03107.2	2026-12-01	KGDLHNWELTEQDYKL	F1MX89	1746.78
0.999999	1	Heifer_2_Az1_22dec18_RD2_01_444.03112.03112.2	16/38	PGPQGPPGPPGIPGAKGELGLP	F1MSJ7	1794.96
0.999999	1	Heifer_2_Az1_22dec18_RD2_01_444.03115.03115.3	22/92	AAPVFTKMLQNLSASEGQLVVFECRV	Q86TC9	2723.38
0.999999	1	Heifer_2_Az1_22dec18_RD2_01_444.03165.03165.3	24/76	FVHTSFHGVGHDYVQLAFQVFG	A5PKH8	2287.12
0.999999	1	Heifer_2_Az1_22dec18_RD2_01_444.03181.03181.3	15/48	YVSSHGDVHLDCLGS	L8IDI9	1394.62
0.999999	1	Heifer_2_Az1_22dec18_RD2_01_444.03185.03185.3	20/64	VVLEEIGCTTEAHILQLQL	Q68RU0	1952.99
0.999999	1	Heifer_2_Az1_22dec18_RD2_01_444.03192.03192.3	14/44	EFGMAIGPENSGKV	L8IU67	1206.57
0.999999	1	Heifer_2_Az1_22dec18_RD2_01_444.03199.03199.3	18/64	RTDPVPEEGEDVAATIGAT	F1MBV6	1669.77
0.999999	1	Heifer_2_Az1_22dec18_RD2_01_444.03202.03202.2	14/26	DPPSGDFLTEGGGVRG	P02672	1387.67
0.999999	1	Heifer_2_Az1_22dec18_RD2_01_444.03218.03218.2	2020-08-01	PSRGGCTLGMASR	A5D965	1111.47
0.999999	1	Heifer_2_Az1_22dec18_RD2_01_444.03236.03236.3	18/52	RSIKKVSSSKGSDGHT	A2VDK8	1415.74
0.999999	1	Heifer_2_Az1_22dec18_RD2_01_444.03264.03264.2	1930-12-01	EGLVSSVQEGTLKKQRVK	L8IES4	1727.99
0.999999	1	Heifer_2_Az1_22dec18_RD2_01_444.03268.03268.2	2022-10-01	KSGEALPQGSPALV	L8HVG8	1125.57
0.999999	1	Heifer_2_Az1_22dec18_RD2_01_444.03315.03315.2	1930-11-01	ALLPEPLKPQAALPVPPS	O18964	1679
0.999999	1	Heifer_2_Az1_22dec18_RD2_01_444.03334.03334.2	19/34	EDGSDPPSGDFLTEGGGVRG	P02672	1761.78
0.999999	1	Heifer_2_Az1_22dec18_RD2_01_444.03346.03346.2	15/34	EDGSDPPSGDFLTEGGGVRG	P02672	1761.78
0.999999	1	Heifer_2_Az1_22dec18_RD2_01_444.03353.03353.3	22/112	GASGAGSGENGRVVSHDFPKSMQSIPCMSHS	G0T3G7	3045.35
0.999999	1	Heifer_2_Az1_22dec18_RD2_01_444.03421.03421.2	2019-12-07	TQSIPAFWA	G3X7I2	847.423
0.999999	1	Heifer_2_Az1_22dec18_RD2_01_444.03422.03422.3	21/68	HPLAPGPPVSPFNSNKEEL-	E1BD49	1891.97
0.999999	1	Heifer_2_Az1_22dec18_RD2_01_444.03466.03466.3	15/44	QYMAPYQSSQVYGD	E1B8X1	1392.6
0.999999	1	Heifer_2_Az1_22dec18_RD2_01_444.03469.03469.2	2020-11-01	EVKVAGSTAVKQD	E1BPG1	1086.64
0.999999	1	Heifer_2_Az1_22dec18_RD2_01_444.03480.03480.3	18/68	TRPTAVKATGGLCLLGAYAD	F1MD78	1817.98
0.999999	1	Heifer_2_Az1_22dec18_RD2_01_444.03666.03666.3	24/68	RSGSIIDQTRVLNLGPITRK	P48733	1939.09
0.999999	1	Heifer_2_Az1_22dec18_RD2_01_444.03668.03668.3	24/136	AGDLSDSSASSLAEPESPGAGGASGGPGGGGGVPDGM	E1BD77	2912.25
0.999999	1	Heifer_2_Az1_22dec18_RD2_01_444.03679.03679.1	2019-12-07	SNPKSAARA	Q3ZC15	742.409
0.999999	1	Heifer_2_Az1_22dec18_RD2_01_444.03686.03686.1	2026-10-01	PPCETHETGTTHTPTT	L8HQM0	1567.66
0.999999	1	Heifer_2_Az1_22dec18_RD2_01_444.03689.03689.1	2019-12-08	QGHFNSHRQ	L8I411	853.394
0.999999	1	Heifer_2_Az1_22dec18_RD2_01_444.03712.03712.2	2016-08-01	PRKRKGNCSQH	Q58DV0	1132.59
0.999999	1	Heifer_2_Az1_22dec18_RD2_01_444.03769.03769.3	23/120	VFEDFANLTPFVKEELRLAIQSKHLCHRMSSAL	Q2KII1	3673.85
0.999999	1	Heifer_2_Az1_22dec18_RD2_01_444.03773.03773.1	2019-12-08	FTDHGATGL	Q95M12	657.272
0.999999	1	Heifer_2_Az1_22dec18_RD2_01_444.03782.03782.3	14/56	MLVSWVMSALNSLIQSL	L8HQA7	1646.87
0.999999	1	Heifer_2_Az1_22dec18_RD2_01_444.03812.03812.3	21/64	PLVKVEESTVEEGTPDETE	A6QNZ5	1860.88
0.999999	1	Heifer_2_Az1_22dec18_RD2_01_444.03881.03881.3	16/64	MVVEMGKARIYQLLAILDF	F1MP29	1931.09
0.999999	1	Heifer_2_Az1_22dec18_RD2_01_444.03909.03909.3	23/152	EEPGTNSTEATVTAIMTTAISKNKTKEYKVVGMYSDGINVL	Q95135	4148.07
0.999999	1	Heifer_2_Az1_22dec18_RD2_01_444.03915.03915.2	2022-10-01	GRKKQLYTTDSDEL	Q08DI1	1482.73
0.999999	1	Heifer_2_Az1_22dec18_RD2_01_444.03916.03916.2	1932-11-01	VYADGLKVADVAEATAGST	G3MZJ5	1636.79
0.999999	1	Heifer_2_Az1_22dec18_RD2_01_444.03935.03935.3	21/76	PLTYSTLNPPEPWAAAAVPEAA	G3N0G9	2097.04
0.999999	1	Heifer_2_Az1_22dec18_RD2_01_444.03944.03944.2	2026-12-01	GSSVASAPVSSFPRTS	Q0VD59	1391.7
0.999999	1	Heifer_2_Az1_22dec18_RD2_01_444.04018.04018.3	1944-12-01	NPPTNLTVVTVEGC	F1N3L5	1225.66
0.999999	1	Heifer_2_Az1_22dec18_RD2_01_444.04024.04024.2	2019-12-11	RRRAPTAHS	E1BC55	807.446
0.999999	1	Heifer_2_Az1_22dec18_RD2_01_444.04025.04025.3	19/56	MAHQQFTGKLQEEMICP	E1B7M2	1834.83
0.999999	1	Heifer_2_Az1_22dec18_RD2_01_444.04041.04041.2	2018-09-01	LTHPRDYSGEME	F1ML49	1207.49
0.999999	1	Heifer_2_Az1_22dec18_RD2_01_444.04095.04095.3	19/80	NADCLAELNEAMRGRAEERHGRP	F1MEW7	2440.14
0.999999	1	Heifer_2_Az1_22dec18_RD2_01_444.04098.04098.2	2024-11-01	EIYSSLRGVTEAIEK	E1BGU2	1436.75
0.999999	1	Heifer_2_Az1_22dec18_RD2_01_444.04112.04112.3	15/44	TERSLFCSLDMGRL	L8HZX3	1469.68
0.999999	1	Heifer_2_Az1_22dec18_RD2_01_444.04132.04132.2	2026-12-01	HGVLVVGYGNLDGKDY	P25326	1404.72
0.999999	1	Heifer_2_Az1_22dec18_RD2_01_444.04136.04136.3	19/60	ARGLPRSRDCGVDLGSEV	Q3T005	1772.86
0.999999	1	Heifer_2_Az1_22dec18_RD2_01_444.04161.04161.3	20/56	CWLREGAELCPGDKYQL	E1BNH9	1820.85
0.999999	1	Heifer_2_Az1_22dec18_RD2_01_444.04234.04234.3	17/40	RYVSAMTTPARMS	F1MPD0	1258.57
0.999999	1	Heifer_2_Az1_22dec18_RD2_01_444.04262.04262.2	2014-08-01	QSQPLPPNTT	Q3SAL2	852.434
0.999999	1	Heifer_2_Az1_22dec18_RD2_01_444.04283.04283.2	13/32	SGPSSGPQMSSGPGGAPLD	A7Z019	1482.68
0.999999	1	Heifer_2_Az1_22dec18_RD2_01_444.04284.04284.2	2020-08-01	GAPASLSPSSPAQ	E1BIJ3	983.492
0.999999	1	Heifer_2_Az1_22dec18_RD2_01_444.04309.04309.2	2018-11-01	YSPSPPMANGAA	F1N1M2	927.412
0.999999	1	Heifer_2_Az1_22dec18_RD2_01_444.04321.04321.3	16/48	LGRARQLIGFYTMAH	A6QM04	1498.77
0.999999	1	Heifer_2_Az1_22dec18_RD2_01_444.04351.04351.3	23/64	RTTPGLSGIVDLGPPLVEK	F1MLS8	1663.9
0.999999	1	Heifer_2_Az1_22dec18_RD2_01_444.04375.04375.3	21/72	KDTMSTGLTGAMGVAKGAVQT	L8IIX4	1825.86
0.999999	1	Heifer_2_Az1_22dec18_RD2_01_444.04382.04382.3	15/52	SRAMLLRLFLAMEKGR	F1MXZ6	1647.93
0.999999	1	Heifer_2_Az1_22dec18_RD2_01_444.04397.04397.3	20/68	GFGGLGGPGGFGGPGGFGPG	G3MZ71	1490.69
0.999999	1	Heifer_2_Az1_22dec18_RD2_01_444.04442.04442.2	2018-11-01	ALPSVMRFCCCV	L8IX47	1328.55
0.999999	1	Heifer_2_Az1_22dec18_RD2_01_444.04446.04446.1	2020-11-01	QPPSSKAVSKMRQ	F1N2N3	1186.65
0.999999	1	Heifer_2_Az1_22dec18_RD2_01_444.04459.04459.3	21/64	SLWESSQELLKDWECMTEL	F1MC39	2198.95
0.999999	1	Heifer_2_Az1_22dec18_RD2_01_444.04470.04470.1	2019-12-07	GSANPGPAR	F1MJZ3	612.287
0.999999	1	Heifer_2_Az1_22dec18_RD2_01_444.04483.04483.1	2026-11-01	GVPGVGVPGVGVPGVG	P04985	1188.69
0.999999	1	Heifer_2_Az1_22dec18_RD2_01_444.04497.04497.1	2020-11-01	RAVMDRSKGTNTQ	A6QQ97	1194.57
0.999999	1	Heifer_2_Az1_22dec18_RD2_01_444.04602.04602.1	1930-11-01	RSEPPSATPSPALSVESL	E1BBG2	1554.74
0.999999	1	Heifer_2_Az1_22dec18_RD2_01_444.04608.04608.1	2019-12-08	LEAPLHQQV	L8IUH1	821.403
0.999999	1	Heifer_2_Az1_22dec18_RD2_01_444.04642.04642.3	24/76	GIIGALPGNQLAINGIVGALNG	F1MLK4	1917.1
0.999999	1	Heifer_2_Az1_22dec18_RD2_01_444.04643.04643.2	1932-12-01	LPLLLLAVIVPGGDNEDAF	L8I8H3	1704.93
0.999999	1	Heifer_2_Az1_22dec18_RD2_01_444.04652.04652.3	18/56	MLVQSSNVPSNPAQVPV	F1N2W7	1535.79
0.999999	1	Heifer_2_Az1_22dec18_RD2_01_444.04653.04653.3	17/64	LDGLRKNPSIAVPIVLKRL	L8IUY6	1875.14
0.999999	1	Heifer_2_Az1_22dec18_RD2_01_444.04656.04656.2	2028-11-01	LAGALAAAATTPLDVCK	E1B7M3	1400.7
0.999999	1	Heifer_2_Az1_22dec18_RD2_01_444.04782.04782.3	19/44	PPPPGVQPFSVPLS	E1BIQ9	1233.68
0.999999	1	Heifer_2_Az1_22dec18_RD2_01_444.04805.04805.3	18/52	FYNYGLSVGAAELQLH	F1MFJ4	1496.75
0.999999	1	Heifer_2_Az1_22dec18_RD2_01_444.04898.04898.3	17/60	TPTPGVALAPTAVSGGGS	E1BAF6	1350.71
0.999999	1	Heifer_2_Az1_22dec18_RD2_01_444.04900.04900.3	15/40	TRFPKFNRNSVGR	A6QPQ5	1320.71
0.999999	1	Heifer_2_Az1_22dec18_RD2_01_444.04936.04936.2	2016-07-01	DMGTIPSYSRA	A8E646	1026.48
0.999999	1	Heifer_2_Az1_22dec18_RD2_01_444.04943.04943.3	19/48	EPPEQTKAEFPKRET	G3N2M8	1555.8
0.999999	1	Heifer_2_Az1_22dec18_RD2_01_444.04955.04955.2	2014-08-01	PMPTFAAWEA	G3N3U8	951.416
0.999999	1	Heifer_2_Az1_22dec18_RD2_01_444.04975.04975.3	16/64	ESSEYGCVMDDQTMAVATG	F1MZ43	1879.73
0.999999	1	Heifer_2_Az1_22dec18_RD2_01_444.04989.04989.3	18/64	LGLHLLPYSPRVLTSGICA	F1MX24	1882.01
0.999999	1	Heifer_2_Az1_22dec18_RD2_01_444.04996.04996.2	2016-09-01	PCPMDSRPCRH	F1MEW5	1177.48
0.999999	1	Heifer_2_Az1_22dec18_RD2_01_444.05078.05078.3	23/92	PLERAQAAENRPGNLEQSEGSCPAQP	L8IYZ9	2611.2
0.999999	1	Heifer_2_Az1_22dec18_RD2_01_444.05096.05096.3	19/72	LSTLSPDAPSPGPAPSPPPPE	F1ML95	1767.87
0.999999	1	Heifer_2_Az1_22dec18_RD2_01_444.05105.05105.3	17/44	PEGHILRSDLQGHQ	L8IAW5	1360.68
0.999999	1	Heifer_2_Az1_22dec18_RD2_01_444.05115.05115.3	18/60	MVPPGVYMRNASCHFQGV	E1BMK1	1834.82
0.999999	1	Heifer_2_Az1_22dec18_RD2_01_444.05121.05121.2	2019-12-08	HYTLGFLCA	G3N0Z7	872.41
0.999999	1	Heifer_2_Az1_22dec18_RD2_01_444.05140.05140.3	16/48	RFGRRRPFILVLAIG	L8ITQ3	1556.97
0.999999	1	Heifer_2_Az1_22dec18_RD2_01_444.05150.05150.3	23/72	TTSFEDVSPQGISDDSSTGSR	L8IWC4	1914.8
0.999999	1	Heifer_2_Az1_22dec18_RD2_01_444.05154.05154.1	2018-09-01	APLGGNSSPSAK	A1XEE1	885.419
0.999999	1	Heifer_2_Az1_22dec18_RD2_01_444.05190.05190.3	23/80	DYEGAPWNCDSCTFLNHPALNRC	G3N227	2521.09
0.999999	1	Heifer_2_Az1_22dec18_RD2_01_444.05246.05246.3	20/80	RRMLLAHVDLIEKLLNYAPLEK-	Q32P78	2494.4
0.999999	1	Heifer_2_Az1_22dec18_RD2_01_444.05275.05275.3	23/112	PGPLLGVLPVVGVVRPAPPPPPPPLTLVLSS	E1BKN0	2847.74
0.999999	1	Heifer_2_Az1_22dec18_RD2_01_444.05286.05286.3	21/68	ASLDLAPAPAPSLPGDMDDG	L8ITZ3	1780.82
0.999999	1	Heifer_2_Az1_22dec18_RD2_01_444.05305.05305.1	2018-11-01	QGIPVSVTDSMF	Q5E9P5	1004.48
0.999999	1	Heifer_2_Az1_22dec18_RD2_01_444.05338.05338.1	2019-12-08	PKSGLWVRN	E1BNG6	844.492
0.999999	1	Heifer_2_Az1_22dec18_RD2_01_444.05380.05380.3	16/48	PSPLASHKVEILPEP	F1MX04	1418.78
0.999999	1	Heifer_2_Az1_22dec18_RD2_01_444.05416.05416.2	2016-07-01	QGHQSSYFLGA	E1BJH5	994.451
0.999999	1	Heifer_2_Az1_22dec18_RD2_01_444.05425.05425.1	2016-08-01	-MAAPGARSCN	A4IF69	935.395
0.999999	1	Heifer_2_Az1_22dec18_RD2_01_444.05455.05455.1	2014-08-01	ALTPYVFLSD	E1BHU3	938.511
0.999999	1	Heifer_2_Az1_22dec18_RD2_01_444.05512.05512.3	17/56	VRNGGRVQLVARLVSRE	E1B933	1680
0.999999	1	Heifer_2_Az1_22dec18_RD2_01_444.05538.05538.2	2014-08-01	HSYNAAHVLK	L8IA35	873.434
0.999999	1	Heifer_2_Az1_22dec18_RD2_01_444.05546.05546.2	13/32	DGISKDGSGDGNKKSASEG	F1N155	1635.77
0.999999	1	Heifer_2_Az1_22dec18_RD2_01_444.05548.05548.3	29/88	RRLPPGPSVPPSSSSSSSSSSSSSA	L8I7N4	2147
0.999999	1	Heifer_2_Az1_22dec18_RD2_01_444.05552.05552.2	2020-09-01	LDGGPPLGPFTDG	E1BPV1	1071.49
0.999999	1	Heifer_2_Az1_22dec18_RD2_01_444.05553.05553.2	2022-10-01	PSSGPSPGANPQLR	F1N3D4	1110.53
0.999999	1	Heifer_2_Az1_22dec18_RD2_01_444.05571.05571.3	21/76	LSGIVEVVGRVTAKATIMCASY	Q3SZ11	2048.08
0.999999	1	Heifer_2_Az1_22dec18_RD2_01_444.05576.05576.3	21/52	GFGLSPIFPGGAGGLG	P04985-4	1288.68
0.999999	1	Heifer_2_Az1_22dec18_RD2_01_444.05625.05625.3	22/60	CYGALAAIPGLRPIHPSG	Q58CZ9	1631.91
0.999999	1	Heifer_2_Az1_22dec18_RD2_01_444.05687.05687.3	19/56	EPGSGGGPGAETRGGSG	E1BAI4	1242.56
0.999999	1	Heifer_2_Az1_22dec18_RD2_01_444.05721.05721.2	2024-10-01	RLPAVVFTTQRGHEL	L8I756	1453.77
0.999999	1	Heifer_2_Az1_22dec18_RD2_01_444.05792.05792.3	14/56	SFAEVLLRTGKLAETKT	E1BFA8	1674.97
0.999999	1	Heifer_2_Az1_22dec18_RD2_01_444.05793.05793.1	2019-12-09	RGDSLILEH	L8IR72	745.386
0.999999	1	Heifer_2_Az1_22dec18_RD2_01_444.05839.05839.3	19/60	YGSPPVSPNDPVVPTESV	Q9XSF7	1577.76
0.999999	1	Heifer_2_Az1_22dec18_RD2_01_444.05843.05843.1	2016-09-01	CESDAQRRASE	F1N3W6	1018.48
0.999999	1	Heifer_2_Az1_22dec18_RD2_01_444.05857.05857.3	18/52	YRGLDTDTTVEVAWCE	E1BM51	1621.74
0.999999	1	Heifer_2_Az1_22dec18_RD2_01_444.05866.05866.3	14/60	NTMVIGGYADGESFLGYV	Q3T108	1678.75
0.999999	1	Heifer_2_Az1_22dec18_RD2_01_444.05877.05877.3	23/116	LQTQNQSITYTGCLTQICFVLVFASLESSLLA	L8HQ63	3420.69
0.999999	1	Heifer_2_Az1_22dec18_RD2_01_444.05879.05879.1	2020-10-01	AEHPLPGPGLPAD	L8I8Z7	1083.57
0.999999	1	Heifer_2_Az1_22dec18_RD2_01_444.05919.05919.2	2014-09-01	AFFSILAHRF	G3N0V8	989.545
0.999999	1	Heifer_2_Az1_22dec18_RD2_01_444.05947.05947.3	16/48	QGEGDIIPKISELSL	Q29RT6	1356.71
0.999999	1	Heifer_2_Az1_22dec18_RD2_01_444.05973.05973.3	26/72	VSSPGCRAEELGGGDAGLGTS	L8HWP6	1789.79
0.999999	1	Heifer_2_Az1_22dec18_RD2_01_444.06029.06029.1	14/24	GGGGGNFGGGGPPGL	F6QPK8	986.421
0.999999	1	Heifer_2_Az1_22dec18_RD2_01_444.06045.06045.1	2019-12-06	AVAPGTLVV	F1MFP1	655.39
0.999999	1	Heifer_2_Az1_22dec18_RD2_01_444.06058.06058.1	2016-08-01	AVAGTGPPRAL	E1B703	824.451
0.999999	1	Heifer_2_Az1_22dec18_RD2_01_444.06080.06080.1	2016-10-01	ETNSRLDSVLL	Q2KID0	1003.53
0.999999	1	Heifer_2_Az1_22dec18_RD2_01_444.06109.06109.1	2026-12-01	EKILQVNSLVEAFGNA	F1MDE3	1530.84
0.999999	1	Heifer_2_Az1_22dec18_RD2_01_444.06118.06118.2	2020-09-01	GKTFTITGGAERY	D0NNU2	1179.62
0.999999	1	Heifer_2_Az1_22dec18_RD2_01_444.06158.06158.3	17/52	GETNGSCDQSDASGHA	A5PK11	1463.52
0.999999	1	Heifer_2_Az1_22dec18_RD2_01_444.06196.06196.3	16/60	LPLKGAGSSCPPSPSETN	L8ICH5	1570.73
0.999999	1	Heifer_2_Az1_22dec18_RD2_01_444.06206.06206.2	2016-09-01	RSHIGHKPYEY	F1MG51	1066.52
0.999999	1	Heifer_2_Az1_22dec18_RD2_01_444.06219.06219.1	2019-12-08	DPARGFTGL	A6QLV9	704.361
0.999999	1	Heifer_2_Az1_22dec18_RD2_01_444.06226.06226.2	2016-08-01	QDPRPSSPTAL	E1BGK8	926.446
0.999999	1	Heifer_2_Az1_22dec18_RD2_01_444.06236.06236.1	2026-11-01	YTLPPGVDPTLVPSSL	A0A1C9EIX6	1378.73
0.999999	1	Heifer_2_Az1_22dec18_RD2_01_444.06256.06256.3	19/48	SEPKNPKLSAPSVED	E1BI58	1394.74
0.999999	1	Heifer_2_Az1_22dec18_RD2_01_444.06263.06263.3	16/44	REALAGTEQPLATP	F1N4B2	1199.6
0.999999	1	Heifer_2_Az1_22dec18_RD2_01_444.06339.06339.2	2020-11-01	VSTITGYPTPGSR	Q52QI2	1079.51
0.999999	1	Heifer_2_Az1_22dec18_RD2_01_444.06353.06353.2	2022-11-01	KCQCKVGVTGSSCD	F1MLU6	1341.55
0.999999	1	Heifer_2_Az1_22dec18_RD2_01_444.06376.06376.2	2014-08-01	VLHALPTGYA	A0A1B3NGX9	870.46
0.999999	1	Heifer_2_Az1_22dec18_RD2_01_444.06390.06390.3	14/44	ESLKLSEVDEDGNL	E1BA36	1304.61
0.999999	1	Heifer_2_Az1_22dec18_RD2_01_444.06400.06400.3	20/56	SPFGSCSRTCGTGVKFR	P79331	1659.75
0.999999	1	Heifer_2_Az1_22dec18_RD2_01_444.06409.06409.3	13/44	PVTTTFPVSTTSLK	L8J1Y3	1252.66
0.999999	1	Heifer_2_Az1_22dec18_RD2_01_444.06457.06457.3	23/48	TNCTCSGGRWTCQEA	L8IJZ1	1614.6
0.999999	1	Heifer_2_Az1_22dec18_RD2_01_444.06499.06499.2	2018-08-01	GSGSLVGQRLSD	E1BMG9	1002.55
0.999999	1	Heifer_2_Az1_22dec18_RD2_01_444.06543.06543.1	2019-08-06	ADTLMRT	P21109	634.311
0.999999	1	Heifer_2_Az1_22dec18_RD2_01_444.06625.06625.3	21/68	SQLSPFSAMELLLASAIFCL	L8I0D5	1997
0.999999	1	Heifer_2_Az1_22dec18_RD2_01_444.06635.06635.2	2020-12-01	SVTGPSSTATTER	F2FB42	1049.49
0.999999	1	Heifer_2_Az1_22dec18_RD2_01_444.06685.06685.3	14/44	LWTSNRNVILMAHD	L8IJ73	1456.72
0.999999	1	Heifer_2_Az1_22dec18_RD2_01_444.06724.06724.2	2022-10-01	PEAEAIVTAASETK	P81282	1190.57
0.999999	1	Heifer_2_Az1_22dec18_RD2_01_444.06752.06752.2	2014-07-01	DGDFDTVAML	F1MHG1	870.343
0.999999	1	Heifer_2_Az1_22dec18_RD2_01_444.06849.06849.3	20/64	SSHGDFSLSVRAQTKVCHY	F1N1Q0	1927.93
0.999999	1	Heifer_2_Az1_22dec18_RD2_01_444.06908.06908.2	2014-08-01	DPGAGQSWRW	F1MPD1	857.414
0.999999	1	Heifer_2_Az1_22dec18_RD2_01_444.06956.06956.2	2018-08-01	DPAGAGAHEAAN	E1BKQ4	850.393
0.999999	1	Heifer_2_Az1_22dec18_RD2_01_444.06981.06981.2	2014-09-01	FRWTGGGKEV	Q5BIS9	889.441
0.999999	1	Heifer_2_Az1_22dec18_RD2_01_444.07038.07038.3	18/56	EKPWGVGAGDFSSALKG	F1MJY3	1518.78
0.999999	1	Heifer_2_Az1_22dec18_RD2_01_444.07084.07084.3	16/60	SVFYVASMAGNILIVFSV	L8I1D5	1745.91
0.999999	1	Heifer_2_Az1_22dec18_RD2_01_444.07114.07114.3	21/56	VMMGLDSAGKTTLLYRL	Q58DI9	1687.83
0.999999	1	Heifer_2_Az1_22dec18_RD2_01_444.07177.07177.3	15/52	VEPGGDRLRTMTYTIV	G3MZV7	1608.79
0.999999	1	Heifer_2_Az1_22dec18_RD2_01_444.07185.07185.3	20/88	MAAGGGGPAPLSSAASSPLSSSLGT	F1MVN9	1897.94
0.999999	1	Heifer_2_Az1_22dec18_RD2_01_444.07231.07231.1	2014-07-01	QQQCGSGGTT	G3N166	793.303
0.999999	1	Heifer_2_Az1_22dec18_RD2_01_444.07350.07350.2	2016-08-01	MSGIGGGPRRD	L8HQM0	855.467
0.999999	1	Heifer_2_Az1_22dec18_RD2_01_444.07397.07397.2	2026-09-01	KQRRGSNPGGNAQSAF	A6QQ78	1398.67
0.999999	1	Heifer_2_Az1_22dec18_RD2_01_444.07647.07647.3	1944-10-01	LSLEAEKGSLESGA	L8HR26	1205.58
0.999999	1	Heifer_2_Az1_22dec18_RD2_01_444.07789.07789.3	13/44	TSGLPLCFLDVIYC	F1MW32	1395.71
0.999999	1	Heifer_2_Az1_22dec18_RD2_01_444.07823.07823.3	17/44	RTTLSGPRSKPASP	E1BK33	1200.65
0.999999	1	Heifer_2_Az1_22dec18_RD2_01_444.07899.07899.3	14/36	LKYNPRFGDAFW	L8HXG6	1213.59
0.999999	1	Heifer_2_Az1_22dec18_RD2_01_444.07901.07901.3	1948-10-01	SVQHTTLSGDSLISQ	A8E646	1356.69
0.999999	1	Heifer_2_Az1_22dec18_RD2_01_444.07960.07960.1	2014-08-01	LGRAKGRTGL	F1MPW7	801.457
0.999999	1	Heifer_2_Az1_22dec18_RD2_01_444.08058.08058.2	2028-11-01	FVNSIATSKGGRHVDYV	L8IH03	1602.81
0.999999	1	Heifer_2_Az1_22dec18_RD2_01_444.08062.08062.3	14/48	QTYFMNPSLQWDLLN	L8IWE2	1626.78
0.999999	1	Heifer_2_Az1_22dec18_RD2_01_444.08079.08079.3	16/60	-VAKAAAAVVGGASTVAA	F1MZV5	1341.76
0.999999	1	Heifer_2_Az1_22dec18_RD2_01_444.08105.08105.2	2018-08-01	RLPRQFCRSCGV	Q0VCP5	1279.59
0.999999	1	Heifer_2_Az1_22dec18_RD2_01_444.08124.08124.2	2014-08-01	VDPKTGVIRT	Q08DJ5	884.508
0.999999	1	Heifer_2_Az1_22dec18_RD2_01_444.08264.08264.2	2028-08-01	PAPPSAPPALPAAAASA	E1BHU6	1287.68
0.999999	1	Heifer_2_Az1_22dec18_RD2_01_444.08273.08273.3	1940-10-01	EQRRLGGSTLLWE	L8I1W0	1285.73
0.999999	1	Heifer_2_Az1_22dec18_RD2_01_444.08280.08280.3	20/68	PNMSVGFTAVLTYSSAWEAR	F1MN15	1948.89
0.999999	1	Heifer_2_Az1_22dec18_RD2_01_444.08302.08302.3	18/44	PMPRPRTLEDCSLE	F1MVP0	1489.7
0.999999	1	Heifer_2_Az1_22dec18_RD2_01_444.08309.08309.2	2019-12-06	HHPRPLPVL	F1N4N3	814.481
0.999999	1	Heifer_2_Az1_22dec18_RD2_01_444.08326.08326.3	13/52	VPSISGVGNPGPGMQG	G3MZ78	1312.61
0.999999	1	Heifer_2_Az1_22dec18_RD2_01_444.08398.08398.3	14/48	VIWGPFGGGIFGQKL	F1MHI2	1362.71
0.999999	1	Heifer_2_Az1_22dec18_RD2_01_444.08455.08455.3	1960-12-01	HSPKSQGSLSPSSNSAFS	A2VE02	1579.75
0.999999	1	Heifer_2_Az1_22dec18_RD2_01_444.08495.08495.3	16/44	MILLTTMTVTLDPP	L8ICZ8	1316.73
0.999999	1	Heifer_2_Az1_22dec18_RD2_01_444.08529.08529.3	23/88	QMDVELVSGSPMTLSPQPRCVRSGC	Q0P5K4	2518.2
0.999999	1	Heifer_2_Az1_22dec18_RD2_01_444.08572.08572.3	1948-11-01	DSPGDVQRSKLSPVL	E1BK81	1368.74
0.999999	1	Heifer_2_Az1_22dec18_RD2_01_444.08574.08574.2	2016-08-01	NAPGALMEAGR	E1BNH0	815.385
0.999999	1	Heifer_2_Az1_22dec18_RD2_01_444.08632.08632.3	20/80	CDCQAGYGGEACGQCGLGYFEAE	Q5EA46	2268.85
0.999999	1	Heifer_2_Az1_22dec18_RD2_01_444.08681.08681.3	15/48	LDTLGGPGERERAAM	Q1LZE8	1327.65
0.999999	1	Heifer_2_Az1_22dec18_RD2_01_444.08774.08774.2	2024-09-01	TQAFCSLQGGSFDVA	F1MG90	1414.62
0.999999	1	Heifer_2_Az1_22dec18_RD2_01_444.08783.08783.3	20/76	QPSSGDLRVTQGPGEPESHLCP	F1MML3	2121.97
0.999999	1	Heifer_2_Az1_22dec18_RD2_01_444.08795.08795.2	2022-10-01	RRPGTSVVSSASMS	F1MDC0	1193.57
0.999999	1	Heifer_2_Az1_22dec18_RD2_01_444.08855.08855.3	17/68	SSNPHTTLSPATPWSSAQEG	F1MS67	1909.88
0.999999	1	Heifer_2_Az1_22dec18_RD2_01_444.08880.08880.3	18/68	VAQLPSEDMSRLAGPQSRDH	A2VDT4	1972.93
0.999999	1	Heifer_2_Az1_22dec18_RD2_01_444.08883.08883.2	2018-07-01	DAPAETHPGSAL	F1MJD3	936.43
0.999999	1	Heifer_2_Az1_22dec18_RD2_01_444.08918.08918.3	15/60	LVTGDGGPGPSGAGAGKV	L8HSM8	1283.61
0.999999	1	Heifer_2_Az1_22dec18_RD2_01_444.08927.08927.3	1948-12-01	PSAAPTESPDPAEDV	P52176	1285.53
0.999999	1	Heifer_2_Az1_22dec18_RD2_01_444.08947.08947.3	16/60	YLLTYMASFNLVYLFTVR	A4FUB8	1909.99
0.999999	1	Heifer_2_Az1_22dec18_RD2_01_444.08976.08976.3	18/64	QVDGKTIKAQIWDTAGQER	Q2TA29	1858.94
0.999999	1	Heifer_2_Az1_22dec18_RD2_01_444.08997.08997.2	2014-09-01	VGVGLVDCHC	A1A4M4	855.391
0.999999	1	Heifer_2_Az1_22dec18_RD2_01_444.09006.09006.3	21/84	ALAPTGFAYAGSVAISGALAGSPA	E1BGK8	1977.02
0.999999	1	Heifer_2_Az1_22dec18_RD2_01_444.09057.09057.2	2020-08-01	TVRQKVASNHSPF	F1MP50	1221.66
0.999999	1	Heifer_2_Az1_22dec18_RD2_01_444.09058.09058.3	16/64	MNKLQPGSVPKINRSMQNW	Q3SYU6	1910.02
0.999999	1	Heifer_2_Az1_22dec18_RD2_01_444.09069.09069.3	15/80	PATGSPLVSAGAKGNACPSAASV	L8HZ32	1872.9
0.999999	1	Heifer_2_Az1_22dec18_RD2_01_444.09125.09125.2	2020-09-01	RYGTDPTPQHYPS	A0JNB0	1274.56
0.999999	1	Heifer_2_Az1_22dec18_RD2_01_444.09155.09155.3	16/52	GTKAGVEAAGTGCCMC	Q1JQA4	1411.59
0.999999	1	Heifer_2_Az1_22dec18_RD2_01_444.09179.09179.3	20/76	MAPDIAGLNLPGGGRLPAEHGK	E1BMC4	1911
0.999999	1	Heifer_2_Az1_22dec18_RD2_01_444.09191.09191.2	2022-08-01	GMSLVAGKALSSAR	F1MXE2	1149.61
0.999999	1	Heifer_2_Az1_22dec18_RD2_01_444.09197.09197.3	20/88	TSALGSSEDGIEPVSPPEGMVEPGH	G3X7K5	2240.02
0.999999	1	Heifer_2_Az1_22dec18_RD2_01_444.09203.09203.3	1952-11-01	EDWMCSRCSANALEED	E1BPL5	1727.67
0.999999	1	Heifer_2_Az1_22dec18_RD2_01_444.09217.09217.2	2016-07-01	GDHILKIGGTN	L8ISR9	952.534
0.999999	1	Heifer_2_Az1_22dec18_RD2_01_444.09273.09273.3	16/76	AYEVLYRNVNSLFMKNTSTTNL	E1B755	2409.16
0.999999	1	Heifer_2_Az1_22dec18_RD2_01_444.09307.09307.3	15/48	GLARTACTNFMMTPY	Q2KI72	1544.68
0.999999	1	Heifer_2_Az1_22dec18_RD2_01_444.09312.09312.3	22/84	DTALSLEGKGRLDYHMSQNEKREY	E1B949	2561.27
0.999999	1	Heifer_2_Az1_22dec18_RD2_01_444.09319.09319.3	13/48	FMMVVISLDRSLAIT	Q19PY9	1478.78
0.999999	1	Heifer_2_Az1_22dec18_RD2_01_444.09335.09335.3	22/92	FVPRFVSASADSAGSNATYMDQAPSP	F1MER9	2428.1
0.999999	1	Heifer_2_Az1_22dec18_RD2_01_444.09360.09360.3	18/80	YTVVIPMLNPVIYSLRNKDVKKS	G3X8B6	2442.4
0.999999	1	Heifer_2_Az1_22dec18_RD2_01_444.09468.09468.3	1944-11-01	LNGAKCIDHPNGYE	L8IK78	1344.59
0.999999	1	Heifer_2_Az1_22dec18_RD2_01_444.09488.09488.3	23/72	QVVLLNFTAFDMGGSAHCDTD	L8IUH1	2053.92
0.999999	1	Heifer_2_Az1_22dec18_RD2_01_444.09497.09497.3	15/64	LMPPVPPDSPRGLFGSWQD	F1MZ43	1866.91
0.999999	1	Heifer_2_Az1_22dec18_RD2_01_444.09503.09503.3	18/64	MQECTVPCRNDCTFTAWSK	G3N0H1	2130.86
0.999999	1	Heifer_2_Az1_22dec18_RD2_01_444.09529.09529.3	23/60	VASVAMAGDHGNGLMEHH	F1MPW9	1595.68
0.999999	1	Heifer_2_Az1_22dec18_RD2_01_444.09561.09561.3	13/40	EFMRYAVNVALMK	L8HPF7	1345.65
0.999999	1	Heifer_2_Az1_22dec18_RD2_01_444.09601.09601.3	18/72	QHMDFDSRYTLLELFAETTSS	E1BM39	2291.04
0.999999	1	Heifer_2_Az1_22dec18_RD2_01_444.09634.09634.3	13/48	LMDALSMAAIPHSST	E1BB22	1345.6
0.999999	1	Heifer_2_Az1_22dec18_RD2_01_444.09677.09677.3	19/72	PHLTPNHPAAQMQHASSQKLA	L8ITE7	2095.04
0.999999	1	Heifer_2_Az1_22dec18_RD2_01_444.09697.09697.2	2024-09-01	LQESGAYQIHRALRA	G5E5L9	1527.79
0.999999	1	Heifer_2_Az1_22dec18_RD2_01_444.09705.09705.3	20/76	TDSTFGTQVLAVMKPPLQEPHL	F1MF00	2210.1
0.999999	1	Heifer_2_Az1_22dec18_RD2_01_444.09713.09713.3	17/76	VAPMNTRRSSVGVGVVGGLLYA	A6QP93	2032.09
0.999999	1	Heifer_2_Az1_22dec18_RD2_01_444.09739.09739.3	16/72	CAPEPPGAAEAGPKGHDTCSL	E1BMR2	1847.81
0.999999	1	Heifer_2_Az1_22dec18_RD2_01_444.09746.09746.3	23/76	QNLMSNILSQSSLVGYIEEAIS	E1BH49	2196.1
0.999999	1	Heifer_2_Az1_22dec18_RD2_01_444.09789.09789.3	15/56	LLINDFGRERKSSSGSS	Q2YDN0	1651.83
0.999999	1	Heifer_2_Az1_22dec18_RD2_01_444.09856.09856.3	14/60	LPGLPGDKGDRGFPGIQG	L8HMU8	1609.82
0.999999	1	Heifer_2_Az1_22dec18_RD2_01_444.09902.09902.3	17/64	SRVIFGPGVTMSTCDVMLL	F1N740	1897.91
0.999999	1	Heifer_2_Az1_22dec18_RD2_01_444.09908.09908.3	19/68	DRVGVPPGTSRVWLSPMEEA	E1BAK0	1996.02
0.999999	1	Heifer_2_Az1_22dec18_RD2_01_444.09927.09927.3	21/68	QYSQEEASSSQAKITTGKSG	L8ICQ8	1900.9
0.999999	1	Heifer_2_Az1_22dec18_RD2_01_444.09948.09948.3	18/80	YLGELVRLILVKMAKEGLLFEGR	Q5W5U3	2343.36
0.999999	1	Heifer_2_Az1_22dec18_RD2_01_444.09976.09976.3	17/64	ASHASGELGAAIMYALVTP	F1MI55	1705.83
0.999999	1	Heifer_2_Az1_22dec18_RD2_01_444.09978.09978.2	2024-10-01	GGGDYLKKPGGVGEA	Q95JH2	1275.65
0.999999	1	Heifer_2_Az1_22dec18_RD2_01_444.09988.09988.3	16/72	EPELPGAEVVALGGEAAAVGR	G3MZF5	1705.89
0.999999	1	Heifer_2_Az1_22dec18_RD2_01_444.10026.10026.3	14/60	LQKELRERKKQLQAMSDK	F1MR53	1987.06
0.999999	1	Heifer_2_Az1_22dec18_RD2_01_444.10036.10036.3	17/60	RFRVQELEAELLELQQMK	E1BJQ4	1991
0.999999	1	Heifer_2_Az1_22dec18_RD2_01_444.10062.10062.3	18/60	LSITVGINQDILQQALEN	F1N0E1	1740.93
0.999999	1	Heifer_2_Az1_22dec18_RD2_01_444.10091.10091.3	15/56	YMILSLFIAIITDSYDT	G3N2S2	1729.88
0.999999	1	Heifer_2_Az1_22dec18_RD2_01_444.10098.10098.2	13/24	RRHTVGGGEMAKAPP	Q0VBZ8	1325.65
0.999999	1	Heifer_2_Az1_22dec18_RD2_01_444.10134.10134.3	1952-11-01	AGKMEEHMKKEMQESQ	F1MR67	1768.74
0.999999	1	Heifer_2_Az1_22dec18_RD2_01_444.10200.10200.2	2026-11-01	EVARPDPGDEAPPPAE	E1B9R5	1387.67
0.999999	1	Heifer_2_Az1_22dec18_RD2_01_444.10210.10210.2	2020-08-01	-MPEPGPRMNGFS	A5PKD9	1247.54
0.999999	1	Heifer_2_Az1_22dec18_RD2_01_444.10224.10224.2	2026-12-01	KAISSAVRKAGLANLY	Q2KJJ9	1369.8
0.999999	1	Heifer_2_Az1_22dec18_RD2_01_444.10289.10289.2	2022-11-01	TPPAPAPTSGIVGA	Q95107	1062.57
0.999999	1	Heifer_2_Az1_22dec18_RD2_01_444.10427.10427.2	2020-10-01	RNADLDNFATHRR	G3N316	1272.58
0.999999	1	Heifer_2_Az1_22dec18_RD2_01_444.10456.10456.3	22/84	LGPTAVTASPAQLSPSPAQSTSPA	L8ILZ4	2051.02
0.999999	1	Heifer_2_Az1_22dec18_RD2_01_444.10464.10464.3	1932-11-01	LRELDREIDRY	E1BF74	1200.62
0.999999	1	Heifer_2_Az1_22dec18_RD2_01_444.10533.10533.2	2018-07-01	CDLDPSAHFYGR	L8J2Y3	1120.48
0.999999	1	Heifer_2_Az1_22dec18_RD2_01_444.10550.10550.3	18/68	HQISTPELSFLDHNTLKVLE	L8HVI9	2054.1
0.999999	1	Heifer_2_Az1_22dec18_RD2_01_444.10605.10605.2	2020-09-01	KSIGPLTFVFTGT	A8E657	1137.61
0.999999	1	Heifer_2_Az1_22dec18_RD2_01_444.10614.10614.3	24/76	LPENIADSSCTGSTEESEMLKR	A5PK86	2183.92
0.999999	1	Heifer_2_Az1_22dec18_RD2_01_444.10619.10619.3	18/64	DAMAAQKRPSQRSKYLASA	Q3SZ92	1908
0.999999	1	Heifer_2_Az1_22dec18_RD2_01_444.10685.10685.3	17/64	DRAHHCSVCKRCIRKMDHH	L8IIH2	2250.06
0.999999	1	Heifer_2_Az1_22dec18_RD2_01_444.10704.10704.3	1956-11-01	VDSNLPVGIAFLVGMAL	F1MF45	1518.78
0.999999	1	Heifer_2_Az1_22dec18_RD2_01_444.10714.10714.2	2022-09-01	TNFPIPGEPGIPLN	G3N230	1249.67
0.999999	1	Heifer_2_Az1_22dec18_RD2_01_444.10734.10734.3	15/60	PSCMASCGGTIHNATLGR	Q29RN8	1651.68
0.999999	1	Heifer_2_Az1_22dec18_RD2_01_444.10803.10803.3	1944-10-01	NSPNLVAFPSPHAA	E1BK86	1235.63
0.999999	1	Heifer_2_Az1_22dec18_RD2_01_444.10815.10815.3	22/84	SNSKQPVGIDLNTGEPMVAADAGV	Q3T084	2183.05
0.999999	1	Heifer_2_Az1_22dec18_RD2_01_444.10829.10829.2	2020-08-01	LCLSCQIASDMNE	Q56JW2	1297.51
0.999999	1	Heifer_2_Az1_22dec18_RD2_01_444.10879.10879.3	15/80	LEDTPRQCRICGGLAMYECRECY	Q1RMU2	2660.1
0.999999	1	Heifer_2_Az1_22dec18_RD2_01_444.10973.10973.3	16/60	GIPKLTPAGDESMPSGFP	F1MPT5	1661.8
0.999999	1	Heifer_2_Az1_22dec18_RD2_01_444.11049.11049.2	2026-10-01	LILVEAGILGSSAFLV	E1BPD1	1388.79
0.999999	1	Heifer_2_Az1_22dec18_RD2_01_444.11066.11066.2	2018-08-01	SSAPSSAVPAAS	L8IJK7	856.429
0.999999	1	Heifer_2_Az1_22dec18_RD2_01_444.11170.11170.2	2016-06-01	GNGSSPVRGIP	L8J0W5	885.467
0.999999	1	Heifer_2_Az1_22dec18_RD2_01_444.11298.11298.3	19/76	KLLLTYGASREAVNIFGLRPVD	F1MAV4	2188.24
0.999999	1	Heifer_2_Az1_22dec18_RD2_01_444.11329.11329.3	15/60	LRSNRLKLIPLGVFTGLS	F1MBT2	1783.08
0.999999	1	Heifer_2_Az1_22dec18_RD2_01_444.11510.11510.3	16/60	SKSKSASFKESYMAAFYE	Q28013	1859.88
0.999999	1	Heifer_2_Az1_22dec18_RD2_01_444.11516.11516.2	2018-09-01	RWLQGSSPPLRM	F1N6I9	1139.61
0.999999	1	Heifer_2_Az1_22dec18_RD2_01_444.11522.11522.2	2026-11-01	RHGGSLGLGLAAMGTA	A7MBA2	1240.62
0.999999	1	Heifer_2_Az1_22dec18_RD2_01_444.11560.11560.2	2018-09-01	PVASQGGSLPAS	Q0VCT9	885.456
0.999999	1	Heifer_2_Az1_22dec18_RD2_01_444.11573.11573.3	15/52	GVSEPSEISENVVAKD	F1N757	1486.75
0.999999	1	Heifer_2_Az1_22dec18_RD2_01_444.11575.11575.3	16/56	HNVSRVPVYSHITHKAL	Q3MHH0	1706.92
0.999999	1	Heifer_2_Az1_22dec18_RD2_01_444.11589.11589.3	19/88	AKAQSPSGAPDPPDAEAMLLVSDGT	A6QQ10	2268.06
0.999999	1	Heifer_2_Az1_22dec18_RD2_01_444.11604.11604.3	14/52	WVVRSEPSLHQPMYYF	G5E691	1704.83
0.999999	1	Heifer_2_Az1_22dec18_RD2_01_444.11620.11620.3	14/64	LVEAIEIYPLAEAEGVQIS	Q29RK0	1842.96
0.999999	1	Heifer_2_Az1_22dec18_RD2_01_444.11636.11636.3	18/72	HEVAAAVAGAHVVIHTAGLVD	Q3MHF2	1783.99
0.999999	1	Heifer_2_Az1_22dec18_RD2_01_444.11659.11659.2	2020-09-01	LFSIVSLMSPEYS	F1MJH9	1287.61
0.999999	1	Heifer_2_Az1_22dec18_RD2_01_444.11699.11699.3	1960-11-01	PELGAAPEEELAALQLGP	Q08DF0	1609.82
0.999999	1	Heifer_2_Az1_22dec18_RD2_01_444.11726.11726.3	16/60	QICPAQAPGVTHIVVDEG	E1BHH1	1704.85
0.999999	1	Heifer_2_Az1_22dec18_RD2_01_444.11774.11774.3	16/80	HNAATIRDAFGRNALHLVASCGK	L8I6H4	2213.11
0.999999	1	Heifer_2_Az1_22dec18_RD2_01_444.11775.11775.2	2024-10-01	NMTCSSNGLPAPKIL	A7MBB0	1390.66
0.999999	1	Heifer_2_Az1_22dec18_RD2_01_444.11792.11792.2	2014-08-01	ARIHSMTIEA	F1N7Q1	985.501
0.999999	1	Heifer_2_Az1_22dec18_RD2_01_444.11826.11826.2	2016-07-01	WTGKVVYFSAT	Q28002	970.512
0.999999	1	Heifer_2_Az1_22dec18_RD2_01_444.11827.11827.3	16/68	EQLTGLIPGDHAPLAQGSKD	Q17QK1	1801.97
0.999999	1	Heifer_2_Az1_22dec18_RD2_01_444.11897.11897.3	13/64	TYGQSPKITTLMKQTHTQP	E1BK20	1977
0.999999	1	Heifer_2_Az1_22dec18_RD2_01_444.11916.11916.3	1952-12-01	CHMQRLSARQPPANYL	E1BKA3	1683.83
0.999999	1	Heifer_2_Az1_22dec18_RD2_01_444.11923.11923.3	14/56	LPSAAGKCKAFSTCGSH	G3X8G2	1527.68
0.999999	1	Heifer_2_Az1_22dec18_RD2_01_444.11992.11992.3	1964-12-01	GLALGAHANGLDSPPMFAG	L8J051	1680.83
0.999999	1	Heifer_2_Az1_22dec18_RD2_01_444.12016.12016.3	14/60	EAPLITESALEVIRKYCE	L8IMT2	1862
0.999999	1	Heifer_2_Az1_22dec18_RD2_01_444.12017.12017.3	15/56	KKLSRMAPEDQEKFRLD	E1BGW5	1846.97
0.999999	1	Heifer_2_Az1_22dec18_RD2_01_444.12093.12093.3	16/72	SSSNGTGGSSTAPLSSSTPSP	E1BPV9	1680.74
0.999999	1	Heifer_2_Az1_22dec18_RD2_01_444.12115.12115.3	13/56	SGPPDSLSDHFTLSFWM	Q0VCN6	1704.78
0.999999	1	Heifer_2_Az1_22dec18_RD2_01_444.12129.12129.2	2016-07-01	TQTAIASEDMP	L8HVM3	964.417
0.999999	1	Heifer_2_Az1_22dec18_RD2_01_444.12155.12155.2	2026-11-01	KEGALDLALEGGVDSP	Q3MHQ0	1344.64
0.999999	1	Heifer_2_Az1_22dec18_RD2_01_444.12175.12175.3	18/60	VARLLLENGAGINTHSNE	F1MI56	1678.88
0.999999	1	Heifer_2_Az1_22dec18_RD2_01_444.12182.12182.3	17/72	VIALSVDAPQAAMREKGVQN-	L8HVX6	2013.03
0.999999	1	Heifer_2_Az1_22dec18_RD2_01_444.12185.12185.3	16/60	VVAPSGRIPNKNSLSEHL	E1BAE4	1704.89
0.999999	1	Heifer_2_Az1_22dec18_RD2_01_444.12194.12194.3	15/56	FITGKGIVAIMRCLQFN	A6QP99	1705.94
0.999999	1	Heifer_2_Az1_22dec18_RD2_01_444.12245.12245.2	2026-10-01	QATGGPELAGSVLSPL	L8HVC7	1254.65
0.999999	1	Heifer_2_Az1_22dec18_RD2_01_444.12314.12314.2	2016-09-01	LQRTKSMFQRT	Q3ZCK1	1196.61
0.999999	1	Heifer_2_Az1_22dec18_RD2_01_444.12338.12338.3	22/84	NLGGVRSISFNVASGSGKSGGYGF	Q148H5	2056.03
0.999999	1	Heifer_2_Az1_22dec18_RD2_01_444.12380.12380.2	2026-10-01	PPPAPLMAQPPPLGAP	G3MYI7	1355.73
0.999999	1	Heifer_2_Az1_22dec18_RD2_01_444.12431.12431.3	1948-10-01	SVPVQVPGSEPDMSQ	Q1LZF1	1340.63
0.999999	1	Heifer_2_Az1_22dec18_RD2_01_444.12547.12547.2	2022-08-01	LLTMATTSDKLASR	E1BDS6	1237.62
0.999999	1	Heifer_2_Az1_22dec18_RD2_01_444.12611.12611.2	2020-11-01	WFYTRAASTARHL	Q32PD5	1279.64
0.999999	1	Heifer_2_Az1_22dec18_RD2_01_444.12651.12651.3	20/72	TAVDTVFRFDPRYNKWMQVAS	A6QQY2	2358.16
0.999999	1	Heifer_2_Az1_22dec18_RD2_01_444.12684.12684.3	20/84	CGNYTYRGPKAFQRHFAEWRHAHG	Q3SWY7	2728.33
0.999999	1	Heifer_2_Az1_22dec18_RD2_01_444.12767.12767.3	21/84	VMNVQYVSCMNPTAGSFTINPRLQ	Q5H9M6	2515.17
0.999999	1	Heifer_2_Az1_22dec18_RD2_01_444.12769.12769.3	25/92	SGGAVTPAPSPGGSSATAGHGVGSAT	Q9N1P1	1948.92
0.999999	1	Heifer_2_Az1_22dec18_RD2_01_444.12778.12778.2	13/32	VKPLMAVSTVVLQAFGKYR	A2VDL9	1851.03
0.999999	1	Heifer_2_Az1_22dec18_RD2_01_444.12793.12793.3	24/104	AIASLRIATEEAALLGADQSARGQAPHQK	E1B842	2773.45
0.999999	1	Heifer_2_Az1_22dec18_RD2_01_444.12796.12796.3	13/52	GKVFLTVPSLSSTAEE	Q16363	1477.8
0.999999	1	Heifer_2_Az1_22dec18_RD2_01_444.12802.12802.3	25/100	EALLMDPVDGPILASLLVGPCALEYTKM	F1MEY0	2771.45
0.999999	1	Heifer_2_Az1_22dec18_RD2_01_444.12805.12805.2	13/32	QLHTLDTDLHSLAQIGGKS	Q5BIM2	1817.96
0.999999	1	Heifer_2_Az1_22dec18_RD2_01_444.12823.12823.3	21/80	VMGNLGPSGMGMDGPGFGGMNRL	A6QQP0	2086.83
0.999999	1	Heifer_2_Az1_22dec18_RD2_01_444.12936.12936.2	2018-09-01	SRSPSGGAAGPL	G3N3D4	855.42
0.999999	1	Heifer_2_Az1_22dec18_RD2_01_444.12948.12948.3	1940-12-01	RAEVEDNIMVTFK	B9X245	1282.58
0.999999	1	Heifer_2_Az1_22dec18_RD2_01_444.13220.13220.2	2014-06-01	GGQPQEPAVE	E1BA93	824.403
0.999999	1	Heifer_2_Az1_22dec18_RD2_01_444.13363.13363.3	1940-11-01	YLVTVVKADDYDE	E1BDF9	1236.62
0.999999	1	Heifer_2_Az1_22dec18_RD2_01_444.13410.13410.3	1936-11-01	FRLTKTPKQRLR	A3KN30	1239.78
0.999999	1	Heifer_2_Az1_22dec18_RD2_01_444.13738.13738.2	2016-10-01	NLGVSGGSLHQ	E1B885	825.434
0.999999	1	Heifer_2__446.01211.01211.2	2016-06-01	LGPGQAPEVAP	F1MUD4	824.403
0.999999	1	Heifer_2__446.02929.02929.3	13/48	TLRLTASGCTLKGYL	F1N7E3	1438.76
0.999999	1	Heifer_2__446.03054.03054.3	14/68	TVQGPSSGNTASSSHSKASN	F1N2H2	1687.78
0.999999	1	Heifer_2__446.03109.03109.3	15/60	MYPPHPLTAQYGVKVLRS	O02811	1838.02
0.999999	1	Heifer_2__446.04010.04010.3	1936-10-01	CYYNGEVTSMCW	G5E641	1238.46
0.999999	1	Heifer_2__446.04014.04014.3	1944-10-01	EPLGAMAASEDEEE	Q58CS7	1234.5
0.999999	1	Heifer_2__446.04100.04100.3	1940-12-01	LLSQSSWHPLSPE	E1BC85	1237.61
0.999999	1	Heifer_2__446.04341.04341.3	1940-11-01	VMNVHASGDACYV	E1B7S3	1239.46
0.999999	1	Heifer_2__446.04392.04392.3	1944-10-01	QPLAEPPMSGLPEF	Q9GLM4	1236.61
0.999999	1	Heifer_2__446.04628.04628.2	2014-06-01	DAIAPGYSML	F1N3J5	824.374
0.999999	1	Heifer_2__446.04666.04666.3	1940-11-01	PTPESTPVLHQKT	E1BNY3	1235.65
0.999999	1	Heifer_2__446.04769.04769.2	2014-08-01	KNLLAAKVPA	L8I076	824.512
0.999999	1	Heifer_2__446.04783.04783.3	1944-11-01	VPENAQPVVPQASR	G3N357	1235.61
0.999999	1	Heifer_2__446.04822.04822.3	1944-09-01	LALADTGLALCTMP	E1BHC4	1235.59
0.999999	1	Heifer_2__446.04842.04842.2	2014-06-01	YEAIPSPVLL	L8IA44	824.464
0.999999	1	Heifer_2__446.04854.04854.2	2014-06-01	FIGYTLGSDT	Q0P5J8	824.392
0.999999	1	Heifer_2__446.05447.05447.3	1944-11-01	LNAMLHSNSRGGEG	L8J3S4	1271.57
0.999999	1	Heifer_2__446.05456.05456.3	1944-11-01	GPGPREPTGLGPFL	L8IN06	1223.63
0.999999	1	Heifer_2__446.05543.05543.2	2022-08-01	MRSHGGMRASPSLK	E1BFC1	1254.63
0.999999	1	Heifer_2__446.05783.05783.2	2019-12-07	TMYPPPVPS	E1BBQ3	815.389
0.999999	1	Heifer_2__446.05914.05914.3	1956-09-01	RDPGGGSGGSGSGCSSS	A6QLB6	1224.43
0.999999	1	Heifer_2__446.06188.06188.3	1940-12-01	DAEDEDEVSCEED	F1MYJ6	1310.45
0.999999	1	Heifer_2__446.06299.06299.3	13/44	LNQGLGMLCTLFGL	A4IFK2	1309.62
0.999999	1	Heifer_2__446.06341.06341.3	1944-11-01	LLTMSSYGNIVVTL	E1BLY7	1283.64
0.999999	1	Heifer_2__446.06350.06350.3	1944-10-01	ADLISNPVLATFPK	A7YWF3	1285.69
0.999999	1	Heifer_2__446.06494.06494.2	2014-06-01	YQTTVKLAPL	A5D7L9	856.502
0.999999	1	Heifer_2__446.06558.06558.3	1948-11-01	QEANLLLAKAGDGNE	G3MXD5	1284.67
0.999999	1	Heifer_2__446.06635.06635.3	19/88	AGLSAARDRLVESLAQQATEAMPPV	F1MTM9	2410.23
0.999999	1	Heifer_2__446.06647.06647.3	1940-08-01	CSTCSGRGNKTCA	F1N504	1226.51
0.999999	1	Heifer_2__446.06657.06657.3	1944-11-01	LIITTRYPPPSGSP	E1BIZ7	1287.68
0.999999	1	Heifer_2__446.06675.06675.1	2014-09-01	TTALPVTTTF	L8J1Y3	802.444
0.999999	1	Heifer_2__446.06695.06695.2	2028-10-01	VVEKGTPGLSFGKKEKK	Q0NXR6	1603.89
0.999999	1	Heifer_2__446.06789.06789.3	1944-09-01	CVLLVTGSWIIANL	M5FKH5	1284.74
0.999999	1	Heifer_2__446.06813.06813.3	22/88	FSSANSPFVPGFSQSLTLSTGFRVL	Q08E62	2385.2
0.999999	1	Heifer_2__446.06848.06848.3	22/80	AVVRAPRRGPLPGRKKKKAPSAS	F1MT65	2268.41
0.999999	1	Heifer_2__446.06867.06867.1	2014-07-01	RDLALMVAAL	E1BMH2	802.426
0.999999	1	Heifer_2__446.06897.06897.3	19/84	LCCTLSTSGGLLLEAAFRGQGGVP	E1BAS6	2253.09
0.999999	1	Heifer_2__446.06912.06912.2	1932-10-01	NGPTGPPGPPGPRGNAGEP	P23206	1513.73
0.999999	1	Heifer_2__446.06979.06979.2	2020-08-01	SGLSGGGGAPGEL	E1BPC9	857.388
0.999999	1	Heifer_2__446.06980.06980.3	21/76	KDVLKPGEDTPSCIPVTSPPIK	F1MPT5	2121.07
0.999999	1	Heifer_2__446.07030.07030.3	17/56	GFTQRHQACFDNDECLA	L8IXA0	1939.79
0.999999	1	Heifer_2__446.07114.07114.1	2019-12-08	YRIIATTEG	P10861	802.455
0.999999	1	Heifer_2__446.07130.07130.3	16/64	PSANPPPPQAHRRLRRSHS	A0JN98	1976.07
0.999999	1	Heifer_2__446.07135.07135.3	1944-11-01	HSAASIPQSIPEWL	L8IX31	1284.63
0.999999	1	Heifer_2__446.07148.07148.3	17/64	RGNRQTNVISKPEWYLAQV	Q08DT8	2003.02
0.999999	1	Heifer_2__446.07156.07156.2	2026-09-01	PPAKSPRGAPGSGGHG	E1BQ01	1274.65
0.999999	1	Heifer_2__446.07180.07180.2	2028-09-01	GGYGGGGLGGAGFRGGN	G3MYU2	1238.58
0.999999	1	Heifer_2__446.07238.07238.3	14/68	PHGGADDLPAPAPSNGLGLL	E1BLR1	1657.81
0.999999	1	Heifer_2__446.07266.07266.2	1930-12-01	SILDFLLSQATLGSGVAA	A2VE49	1603.88
0.999999	1	Heifer_2__446.07292.07292.3	1944-12-01	CLELAASLRDLGQP	G3N3C3	1284.7
0.999999	1	Heifer_2__446.07353.07353.3	20/72	PPCALLLCHGSGLPGQLTPIS	F1MR35	2003.03
0.999999	1	Heifer_2__446.07361.07361.2	2024-10-01	HCTVTSMSPVGPTKW	F1MD75	1363.65
0.999999	1	Heifer_2__446.07385.07385.2	2020-09-01	YPLHSSVTLEEQN	F1MNA1	1238.61
0.999999	1	Heifer_2__446.07391.07391.3	20/68	LYLLESTEDPVIIERALVTL	E1B717	2060.1
0.999999	1	Heifer_2__446.07444.07444.2	2026-11-01	DTGVEVSNIGSQDAPL	Q3SWZ4	1372.65
0.999999	1	Heifer_2__446.07447.07447.3	1940-08-01	LPSVVWAVAKEEV	E1B9K4	1213.63
0.999999	1	Heifer_2__446.07502.07502.2	2016-07-01	SFAQTSNLRQH	F1ML21	1063.54
0.999999	1	Heifer_2__446.07556.07556.3	14/56	PGPGIQGAGMQGGGMQG	Q2HJD4	1344.59
0.999999	1	Heifer_2__446.07573.07573.3	20/72	QLKNLTGSLGGGEDKGDGDKS	Q0IIE0	1859.92
0.999999	1	Heifer_2__446.07597.07597.3	1948-10-01	SSDSGTPSGPDFNYL	F1MU48	1342.53
0.999999	1	Heifer_2__446.07610.07610.2	2022-09-01	NASSHSTSGFASTF	E1BIQ6	1138.49
0.999999	1	Heifer_2__446.07615.07615.2	2018-07-01	TPRKHTTLKEEK	L8IVB6	1237.68
0.999999	1	Heifer_2__446.07637.07637.3	19/84	FAQPPAPTPPSAPSKGGGSSSRGG	L8HRY7	1989.99
0.999999	1	Heifer_2__446.07670.07670.3	1944-10-01	LSPEVSGLVEMLWA	L8IZT2	1345.66
0.999999	1	Heifer_2__446.07816.07816.2	2024-10-01	DDDLPSVPVFDKTLP	A0JN64	1444.74
0.999999	1	Heifer_2__446.07853.07853.3	15/56	LSDPQERAWYDNHREAL	Q0II91	1872.81
0.999999	1	Heifer_2__446.07876.07876.3	19/68	LECFTPKGSMGNGGRATMSS	L8HV34	1902.8
0.999999	1	Heifer_2__446.07885.07885.3	18/60	EPSVTALSQPHLIFILAD	E1BKH3	1705.98
0.999999	1	Heifer_2__446.07907.07907.3	15/72	RNTEKAKTKEVPKVKRGRGRP	F1N6I8	2181.28
0.999999	1	Heifer_2__446.07928.07928.3	13/44	QEEAAPETAGLKSE	G5E5H5	1201.58
0.999999	1	Heifer_2__446.07930.07930.3	16/64	LWSLGVILFMLVCGQPPFQ	L8IXA2	1963.01
0.999999	1	Heifer_2__446.07943.07943.3	15/64	MLSIVQDILRFETPASKMV	P55156	1963.04
0.999999	1	Heifer_2__446.07946.07946.2	2028-10-01	DTGALEGPGDPGPPSLQ	E1BM25	1363.66
0.999999	1	Heifer_2__446.07949.07949.3	20/88	LRGKAGPLGLAGEKGDQGETGKKGP	L8HK50	2210.18
0.999999	1	Heifer_2__446.07979.07979.3	14/64	PAPPVSMNPVGTLPPRPIP	F1N440	1741.95
0.999999	1	Heifer_2__446.08047.08047.3	30/116	YVYEDSAAESGSGGGSGGGGGSAGGAGVGCSG	A4FV76	2459.97
0.999999	1	Heifer_2__446.08070.08070.2	2022-11-01	DLGRLLSGGRGHRG	A0A0F6RAG5	1277.74
0.999999	1	Heifer_2__446.08082.08082.2	2020-08-01	KDPALFSSLSASS	E1BAT5	1093.53
0.999999	1	Heifer_2__446.08110.08110.2	2016-07-01	RGLAHLHSHNY	F1MC27	984.489
0.999999	1	Heifer_2__446.08123.08123.3	1944-12-01	AGEAANGIRNDWQV	B6DXC7	1329.61
0.999999	1	Heifer_2__446.08137.08137.3	16/56	SYSPTQRSPGCRPLPSA	F1MHA1	1701.83
0.999999	1	Heifer_2__446.08239.08239.2	2018-08-01	AEELNTDHSMVL	F1MXY5	1189.49
0.999999	1	Heifer_2__446.08253.08253.3	16/56	QFLDRSLDMPFMLFDPS	E1BPV9	1858.86
0.999999	1	Heifer_2__446.08270.08270.3	21/72	DAASELSLTPLELTDSAVYLC	A5PKB1	1992.03
0.999999	1	Heifer_2__446.08359.08359.2	2024-09-01	LDASGKPLKFGLGMY	E1BLB4	1335.69
0.999999	1	Heifer_2__446.08458.08458.3	19/64	SIPSRAFKTAMFFVALAMF	F1MLN5	1916.01
0.999999	1	Heifer_2__446.08469.08469.2	2022-08-01	QHNSKDGSAAYVQH	A6QQW0	1275.58
0.999999	1	Heifer_2__446.08501.08501.3	16/56	YVLDGRLGTEKESPTVE	Q29RZ4	1599.85
0.999999	1	Heifer_2__446.08503.08503.2	2022-08-01	FLGMLAMNDMALAS	E1BHQ3	1297.57
0.999999	1	Heifer_2__446.08518.08518.3	19/60	APIPTGIHAQQNLSGCFS	L8IVB6	1738.85
0.999999	1	Heifer_2__446.08535.08535.3	1952-12-01	HATLPETGLTHRIRAL	L8J2B4	1534.86
0.999999	1	Heifer_2__446.08607.08607.3	15/68	WATAMNNLGMVPVGLPGQQL	F1N0M8	1796.89
0.999999	1	Heifer_2__446.08649.08649.3	28/104	MALRPGSGAGGGGAAGAGTGAAGGGSFMF	F1MI41	2134.98
0.999999	1	Heifer_2__446.08668.08668.3	15/56	LGTAQGHYLYIESSEPQ	F1MFJ4	1650.75
0.999999	1	Heifer_2__446.08670.08670.2	2014-05-01	RLLTPSPGYG	L8IX47	846.449
0.999999	1	Heifer_2__446.08751.08751.3	21/56	AGKNEEPSSHHIPHGKE	A2VE10	1652.8
0.999999	1	Heifer_2__446.08771.08771.2	2018-08-01	LVPESQLSPVEE	F1MV84	1083.54
0.999999	1	Heifer_2__446.08787.08787.3	14/60	NTDDIDLAGDIIQSMASF	F1MU26	1679.76
0.999999	1	Heifer_2__446.08799.08799.3	15/64	EDEQTLDCLETAMASRGIT	L8IEG2	1908.86
0.999999	1	Heifer_2__446.08816.08816.3	17/72	EDKEAVFEVSDTMSAVLQVAT	Q3SZJ0	2053.99
0.999999	1	Heifer_2__446.08820.08820.3	13/64	LDSASAQFAASALVTSEQL	L8IRC4	1681.78
0.999999	1	Heifer_2__446.08886.08886.3	18/68	GKKPSFMVIRFPGRRGYGRL	F1MG13	2167.19
0.999999	1	Heifer_2__446.08930.08930.2	2020-11-01	AFSQKSGLIEHQR	G3MZM0	1272.65
0.999999	1	Heifer_2__446.09012.09012.2	2018-07-01	GFYGEVMSPLFP	F1N0N3	1188.55
0.999999	1	Heifer_2__446.09105.09105.2	2022-09-01	ALLDEKRRLEARIA	Q27991	1510.89
0.999999	1	Heifer_2__446.09134.09134.2	2016-07-01	EASKAALLPSV	L8HYN5	856.502
0.999999	1	Heifer_2__446.09157.09157.3	1936-11-01	RFYQMTGETWKL	Q2TBH5	1305.57
0.999999	1	Heifer_2__446.09230.09230.3	1972-12-01	HVPVPRALRMEEDSIRLPAHL	Q0VC65	2201.17
0.999999	1	Heifer_2__446.09237.09237.3	17/76	GEGETEGSLPGGEARDEMMAGT	E1BG88	2053.82
0.999999	1	Heifer_2__446.09294.09294.3	19/72	KLEVFPSSPVLMVSGHRHSSL	F1MNL6	2065.04
0.999999	1	Heifer_2__446.09296.09296.2	2018-09-01	MELTKLSDMTKL	G3MY95	1164.61
0.999999	1	Heifer_2__446.09308.09308.2	2022-10-01	LRAIEEKKRLDGRQ	Q3SWZ4	1469.84
0.999999	1	Heifer_2__446.09356.09356.2	2022-10-01	LFNSSRLHLPRPSA	E1BEM1	1409.75
0.999999	1	Heifer_2__446.09444.09444.3	17/52	ERWCHEIQIMKKLNHA	Q95KV1	1907.96
0.999999	1	Heifer_2__446.09449.09449.3	1976-12-01	AGPQLAGPVAPPAGMPETVALH	E1B810	1871.98
0.999999	1	Heifer_2__446.09561.09561.2	2020-09-01	QFSLYTSPSLPNL	F1MNA5	1224.6
0.999999	1	Heifer_2__446.09563.09563.2	2016-07-01	GASVPCHPHKG	L8J3J1	1031.5
0.999999	1	Heifer_2__446.09579.09579.2	14/36	GPGAVGAAGGGGGGGGGGDYG	F1N694	1389.59
0.999999	1	Heifer_2__446.09603.09603.2	1932-10-01	LGGRAAASLAAVSGAAAAG	G3MXD0	1370.73
0.999999	1	Heifer_2__446.09610.09610.2	2022-10-01	VAPITGGDIGIRRA	Q3SZA6	1224.69
0.999999	1	Heifer_2__446.09614.09614.3	17/68	LHGLTGKPEDNEVLKYPYET	F1MRC9	2088.02
0.999999	1	Heifer_2__446.09640.09640.3	18/68	LPSGVQQCAPVGLYGSAFGA	E1B8F2	1793.84
0.999999	1	Heifer_2__446.09696.09696.2	2028-12-01	EPPEAEGGAKAGTGNCF	F1MZW2	1414.61
0.999999	1	Heifer_2__446.09705.09705.3	15/64	LFRGVFVHRYRDVLPEIRA	E1B9B0	2158.19
0.999999	1	Heifer_2__446.09716.09716.3	1948-12-01	DMVCGDIPFEHDEEL	Q9N0P9	1576.62
0.999999	1	Heifer_2__446.09733.09733.2	2018-08-01	LDIRNIDEQPKA	F1MXX2	1226.63
0.999999	1	Heifer_2__446.09848.09848.2	2020-08-01	RTTRISVVVSGTT	O62672	1118.63
0.999999	1	Heifer_2__446.09910.09910.3	19/68	FEREQITLDVLVEMGHKELK	E1BMY0	2138.1
0.999999	1	Heifer_2__446.09932.09932.2	2024-09-01	AGMPDPTSDEVHGEQ	E1BDQ4	1369.55
0.999999	1	Heifer_2__446.09950.09950.3	1960-12-01	AVPASTTVLLQPLVQPPP	A4FUY2	1658.96
0.999999	1	Heifer_2__446.10049.10049.3	18/72	SVGRKVRDLGMVVDLIFLNTE	F1MM36	2160.21
0.999999	1	Heifer_2__446.10342.10342.3	1952-12-01	EQGKEPWMVVNDMTGP	A6QNV5	1606.71
0.999999	1	Heifer_2__446.10414.10414.2	2016-07-01	SGVEVVLVEKK	E1B7L8	970.57
0.999999	1	Heifer_2__446.10427.10427.3	15/64	SRLPCATLVQHMSGMYRHL	Q3T0I6	2087.98
0.999999	1	Heifer_2__446.10492.10492.3	19/72	GYGTLMGAGVNYPYAGSAFGS	A2VE81	1910.85
0.999999	1	Heifer_2__446.10538.10538.3	1940-11-01	RLEVIIEESYEFK	P48765	1369.67
0.999999	1	Heifer_2__446.10564.10564.3	18/56	FVHLSYLTGNPIYYKKV	E1BI49	1794.97
0.999999	1	Heifer_2__446.10599.10599.3	15/56	WSWTGGLVVGLVVTSSL	L8HP42	1460.79
0.999999	1	Heifer_2__446.10686.10686.3	19/76	LLSAVLGELPPSQGKVSVLGRL	L8IKV6	2006.15
0.999999	1	Heifer_2__446.10807.10807.2	2020-09-01	LVAWLGLNVFLFV	E1BPJ7	1277.72
0.999999	1	Heifer_2__446.10817.10817.3	18/60	TEPAICALRHLTSRHQEA	Q0VCX4	1916.96
0.999999	1	Heifer_2__446.10824.10824.3	18/64	NFGGGNTAWEEKTLSKYEF	Q2KIT5	1915.9
0.999999	1	Heifer_2__446.10982.10982.3	13/60	LPASDLLPGGPSSPLANS	A7YWC8	1491.76
0.999999	1	Heifer_2__446.11049.11049.3	16/52	LYPEVVHMFAVNMFRT	A4FV55	1754.83
0.999999	1	Heifer_2__446.11100.11100.3	13/52	VYSSLKIKRCLLLGRK	E1BF56	1706
0.999999	1	Heifer_2__446.11133.11133.2	2020-09-01	GLSWALAPPAVLL	F1MG33	1136.66
0.999999	1	Heifer_2__446.11227.11227.2	2014-06-01	MESHGLPGKV	L8I0Y1	823.419
0.999999	1	Heifer_2__446.11255.11255.3	1936-11-01	KRPHECGICKKA	F1N264	1283.62
0.999999	1	Heifer_2__446.11342.11342.3	1940-10-01	KKLLGNDMICATS	F1MB31	1234.61
0.999999	1	Heifer_2__446.11375.11375.3	1940-12-01	ELLALPANQVHCL	F1N107	1234.65
0.999999	1	Heifer_2__446.11381.11381.3	1936-10-01	NNTKFVHDNYVL	F1ML89	1235.59
0.999999	1	Heifer_2__446.11577.11577.3	1940-09-01	LVTSILEVYTSQE	A0JN42	1238.64
0.999999	1	Heifer_2__446.11602.11602.2	2014-06-01	PTGMIGYGIP	F1N605	826.389
0.999999	1	Heifer_2__446.11826.11826.2	2019-12-07	QISIVMVYF	A5D7E2	823.451
0.999999	1	Heifer_2__446.11833.11833.2	2014-05-01	LLAGLGHEER	P79114	824.403
0.999999	1	Heifer_2__446.11860.11860.3	1944-11-01	QACYPLAFGVPAAL	L8IHQ8	1235.6
0.999999	1	Heifer_2__446.11879.11879.2	2014-06-01	VYPVGGAMDT	A0JN46	824.337
0.999999	1	Heifer_3_Az1_22dec18_RD4_01_449.00050.00050.3	1952-11-01	CSRGGGAGEKGSSEGD	L8IIZ7	1234.55
0.999999	1	Heifer_3_Az1_22dec18_RD4_01_449.00337.00337.3	1944-12-01	FETVSEDGDVLSST	E1BPJ3	1236.54
0.999999	1	Heifer_3_Az1_22dec18_RD4_01_449.00346.00346.3	20/56	DSAGPRPHSPQLRSRTR	E1BFD6	1645.88
0.999999	1	Heifer_3_Az1_22dec18_RD4_01_449.00356.00356.2	2022-12-01	LSPPALPPPAPSPP	L8I2S9	1126.6
0.999999	1	Heifer_3_Az1_22dec18_RD4_01_449.00358.00358.2	2022-11-01	NSTRAVGMAPLYAG	G3N1J5	1251.63
0.999999	1	Heifer_3_Az1_22dec18_RD4_01_449.00363.00363.2	2020-10-01	TDNATSTSNAASA	F1MR67	1037.43
0.999999	1	Heifer_3_Az1_22dec18_RD4_01_449.00364.00364.2	13/26	PPASADDRSQGAIIGE	F1MX04	1356.66
0.999999	1	Heifer_3_Az1_22dec18_RD4_01_449.00490.00490.2	17/26	DPATHGGASSKASSD-	P07456	1271.57
0.999999	1	Heifer_3_Az1_22dec18_RD4_01_449.00492.00492.2	16/26	DPATHGGASSKASSD-	P07456	1271.57
0.999999	1	Heifer_3_Az1_22dec18_RD4_01_449.00494.00494.3	18/40	DIYFSGLSVTERW	A0JNG0	1270.66
0.999999	1	Heifer_3_Az1_22dec18_RD4_01_449.00497.00497.3	21/88	AAGSGGLGGPARPVLVAAAVSGSGG	A2VE77	1907.02
0.999999	1	Heifer_3_Az1_22dec18_RD4_01_449.00500.00500.2	14/26	DPATHGGASSKASSD-	P07456	1271.57
0.999999	1	Heifer_3_Az1_22dec18_RD4_01_449.00503.00503.2	18/26	DPATHGGASSKASSD-	P07456	1271.57
0.999999	1	Heifer_3_Az1_22dec18_RD4_01_449.00553.00553.3	18/80	GMRPPPNSLGPAMPGINMGPGAG	A8E4N8	2061
0.999999	1	Heifer_3_Az1_22dec18_RD4_01_449.00558.00558.2	14/28	REGPPAAPAAAPGYGQS	F1MFL5	1352.64
0.999999	1	Heifer_3_Az1_22dec18_RD4_01_449.00645.00645.2	2020-09-01	HQAFLTSAALAQA	Q9GLM3	1119.59
0.999999	1	Heifer_3_Az1_22dec18_RD4_01_449.06527.06527.2	2018-08-01	AVPEGSRGMAGS	A6QP17	975.444
0.999999	1	Heifer_3_Az1_22dec18_RD4_01_449.06578.06578.3	15/40	NPQDPLKDLVSLA	A5D9C4	1223.68
0.999999	1	Heifer_3_Az1_22dec18_RD4_01_449.06632.06632.3	1940-10-01	YRTVSGMDGVKCG	A5D7V3	1224.56
0.999999	1	Heifer_3_Az1_22dec18_RD4_01_449.06639.06639.3	13/44	GEDYEKVKLLEISA	F1N607	1464.77
0.999999	1	Heifer_3_Az1_22dec18_RD4_01_449.06806.06806.2	2019-12-05	KTPFVCTEC	L8I096	852.369
0.999999	1	Heifer_3_Az1_22dec18_RD4_01_449.06881.06881.2	2016-06-01	GQPSGGGHKSA	E1B7V5	853.404
0.999999	1	Heifer_3_Az1_RD3_01_451.02145.02145.3	23/52	FRLHVGVLQKGSVGLV	A1L4Z4	1461.88
0.999999	1	Heifer_3_Az1_RD3_01_451.02160.02160.2	1930-12-01	VPRAAAEGPQPVSAAPAP	F1N0E1	1488.77
0.999999	1	Heifer_3_Az1_RD3_01_451.02173.02173.2	15/34	SLGRGGGGAGAGPSTRAPGR	E1BK68	1494.77
0.999999	1	Heifer_3_Az1_RD3_01_451.02176.02176.3	21/60	YKCKECGKTFRGRTVLIR	Q08E61	1952.04
0.999999	1	Heifer_3_Az1_RD3_01_451.02195.02195.2	2028-12-01	AAVTAAAATAPAAEDAA	P06836	1299.63
0.999999	1	Heifer_3_Az1_RD3_01_451.02198.02198.3	19/76	LQGNPGRPGLNGMKGDPGLPGV	L8HMU8	1933.94
0.999999	1	Heifer_3_Az1_RD3_01_451.02200.02200.2	2016-12-01	TGTFAVLSLMT	L8IA71	953.489
0.999999	1	Heifer_3_Az1_RD3_01_451.02232.02232.3	18/40	LNVHMNPPQVKAT	Q95115	1233.63
0.999999	1	Heifer_3_Az1_RD3_01_451.02234.02234.2	13/24	QLSDDIPFRVNWPGT	F1MGK3	1514.75
0.999999	1	Heifer_3_Az1_RD3_01_451.02248.02248.2	2018-11-01	KDLNTGVFNNQE	L8HT09	1120.51
0.999999	1	Heifer_3_Az1_RD3_01_451.02251.02251.3	24/72	LPNWGMAVGMGAIIPPHLQGL	L8HQR2	1960.97
0.999999	1	Heifer_3_Az1_RD3_01_451.02254.02254.3	25/92	SLAAWGRKALDLAENEMPGLMHMREM	Q3MHL4	2738.35
0.999999	1	Heifer_3_Az1_RD3_01_451.02261.02261.3	23/84	GEGRFIKKEPNLFSHGAVLPETSR	F1MJH6	2455.29
0.999999	1	Heifer_3_Az1_RD3_01_451.02264.02264.2	2026-10-01	EAPRSVSGSNEPNPVE	Q28083	1409.69
0.999999	1	Heifer_3_Az1_RD3_01_451.02275.02275.2	1930-12-01	HHMNGSLGSGDMDGLPKN	A8E4N8	1630.71
0.999999	1	Heifer_3_Az1_RD3_01_451.02298.02298.3	28/92	RAPRKQATPSRVIPAKPKPKPKSSSQ	G3N2D0	2555.5
0.999999	1	Heifer_3_Az1_RD3_01_451.02314.02314.3	23/88	GSSIFSISFPLLIKTLGAKIKLAQT	F1MM56	2474.49
0.999999	1	Heifer_3_Az1_RD3_01_451.02315.02315.3	18/72	EDGKAVIPLGITVQGDVLIIL	L8IZM7	1920.13
0.999999	1	Heifer_3_Az1_RD3_01_451.02318.02318.2	14/28	TENLDVIVNVSDTESWD	Q28030	1718.8
0.999999	1	Heifer_3_Az1_RD3_01_451.02326.02326.2	1942-11-01	TGGPGASRTPLCLALPGLPVAPEG	F1MIB7	2129.13
0.999999	1	Heifer_3_Az1_RD3_01_451.02335.02335.3	21/60	TGNQASRAGQASNPGHRS	A6QLH6	1606.77
0.999999	1	Heifer_3_Az1_RD3_01_451.02337.02337.2	1930-10-01	SGSLKRPGSSRQLPSNLR	Q58CQ7	1695.94
0.999999	1	Heifer_3_Az1_RD3_01_451.02338.02338.3	23/88	LSGVPGGIGGVESGAGLLSGVTMFH	G3MZM7	2064.02
0.999999	1	Heifer_3_Az1_RD3_01_451.02355.02355.3	19/60	KIRGPIYLGGVAPGRAVK	F1MYX9	1594.93
0.999999	1	Heifer_3_Az1_RD3_01_451.02360.02360.2	14/32	PSPAPSAQAPGSSSPTHMQ	F1N4X1	1608.72
0.999999	1	Heifer_3_Az1_RD3_01_451.02363.02363.2	1936-10-01	LGLVPTGAPGGPPPMRVLAGN	Q2TEA4	1758.95
0.999999	1	Heifer_3_Az1_RD3_01_451.02367.02367.3	25/96	ELPRRVNSAPSSNPPAEVDPDTILKAL	A7YW33	2643.4
0.999999	1	Heifer_3_Az1_RD3_01_451.02377.02377.3	25/96	VCDLIMTAIKRNGADYRDMILKQVVNQ	E1BNY9	2968.49
0.999999	1	Heifer_3_Az1_RD3_01_451.02378.02378.2	1936-12-01	QSLLTNHDTMVLSITKGHGFL	G5E5M8	2086.05
0.999999	1	Heifer_3_Az1_RD3_01_451.02386.02386.3	27/100	FGVIPSTPLAIHTPLMPNQSIDVSLPLN	P63009	2725.47
0.999999	1	Heifer_3_Az1_RD3_01_451.02389.02389.3	14/76	SQLHKCAFQFPGGPPGGGGTYL	E1BDE8	2074.97
0.999999	1	Heifer_3_Az1_RD3_01_451.02397.02397.3	22/108	GGPKGGKMPGGPKPGGGPGLSTPGGHPKPP	E1BQ37	2519.31
0.999999	1	Heifer_3_Az1_RD3_01_451.02399.02399.3	23/104	LGPLGAPGEDGRPGPPGSIGIRGQPGSMG	F1N2Y2	2513.24
0.999999	1	Heifer_3_Az1_RD3_01_451.02403.02403.3	15/80	RVGTLCHEHGVCFLVADTRGLVG	L8IRJ0	2339.15
0.999999	1	Heifer_3_Az1_RD3_01_451.02406.02406.3	23/96	FILLGFQNGKEVEILLFSAFLLMYMIS	F1MQQ6	2917.57
0.999999	1	Heifer_3_Az1_RD3_01_451.02410.02410.3	27/108	PQGSLTQEELMVSMVTGLASLTSRTSMGIL	D7GLD1	2958.43
0.999999	1	Heifer_3_Az1_RD3_01_451.02418.02418.3	24/88	DRSPAAAAAVSGLGSGHRTATSGPR	M5FMX2	2078.06
0.999999	1	Heifer_3_Az1_RD3_01_451.02430.02430.3	21/100	DLGATKDRIISEINRLQQEATEHATESE	E1BLS8	2909.48
0.999999	1	Heifer_3_Az1_RD3_01_451.02437.02437.2	1936-08-01	DGLPGRAGPVGEPGRPGQGGL	E1BG60	1714.89
0.999999	1	Heifer_3_Az1_RD3_01_451.02439.02439.3	21/96	DPGLLLRFLAAMAAVGALEPLLPGPLL	G3X812	2499.47
0.999999	1	Heifer_3_Az1_RD3_01_451.02447.02447.3	18/108	MLGDKFNGELEASAKNVIAETIRGQAGIVL	Q0II48	2899.54
0.999999	1	Heifer_3_Az1_RD3_01_451.02470.02470.2	13/28	RREEKGGRNTGRSKPGG	F1MU82	1627.85
0.999999	1	Heifer_3_Az1_RD3_01_451.02471.02471.2	1932-10-01	LPGLQGPPGFSGPKGPPGP	F1MJQ6	1545.79
0.999999	1	Heifer_3_Az1_RD3_01_451.02474.02474.3	27/92	LAILSVLLAVLLAALLALLIFTWYDT	A6QQ85	2614.58
0.999999	1	Heifer_3_Az1_RD3_01_451.02483.02483.3	30/120	GTGPDPRSGGPMGPGSGPSLRAGVLLTPGNGPP	P0CG10	2855.43
0.999999	1	Heifer_3_Az1_RD3_01_451.02496.02496.2	2028-12-01	RRGETRQWQTAVIIGPD	L8I0D4	1710.92
0.999999	1	Heifer_3_Az1_RD3_01_451.02527.02527.2	13/34	TGKFERLIVGLMRPPAYADA	P79134	2032.09
0.999999	1	Heifer_3_Az1_RD3_01_451.02529.02529.3	20/96	LEVGVQNSLLALAMLQLSLRRLQADYA	Q0V8N6	2816.52
0.999999	1	Heifer_3_Az1_RD3_01_451.02534.02534.3	33/156	RAAGGGGGGGGGGGGGGAGGGGGGGAGGGAGGGGRSPVRELD	E1BLB9	2807.28
0.999999	1	Heifer_3_Az1_RD3_01_451.02545.02545.2	1934-10-01	RYHLVDKERDSAEGSHVSGQ	Q6T5B7	1984.92
0.999999	1	Heifer_3_Az1_RD3_01_451.02549.02549.2	1934-10-01	PSGPPGKDGASGHPGPIGPP	P04258	1583.77
0.999999	1	Heifer_3_Az1_RD3_01_451.02555.02555.2	1936-12-01	DNAKGTFGDDNVTVTFTYAKL	Q9GL34	2047.99
0.999999	1	Heifer_3_Az1_RD3_01_451.02561.02561.3	22/100	VNHGNYILSGLTYLSTASYSCDNGYSLQ	F1MNH3	2869.29
0.999999	1	Heifer_3_Az1_RD3_01_451.02577.02577.2	1942-10-01	PNKEYVIDDISLLNLLKGLCLKYL	F1MFB3	2623.43
0.999999	1	Heifer_3_Az1_RD3_01_451.02580.02580.2	1940-09-01	LYMAKQATGGAAKVSQFLVDGVC	A0JNJ3	2140.1
0.999999	1	Heifer_3_Az1_RD3_01_451.02583.02583.3	19/96	MPQQYSGVSPSGPGVVVMQLNVPNGPQ	A0JNC2	2507.25
0.999999	1	Heifer_3_Az1_RD3_01_451.02587.02587.2	1932-11-01	LAQKKAISFLGCAIQMFSF	F1MX92	1914.97
0.999999	1	Heifer_3_Az1_RD3_01_451.02588.02588.2	1934-11-01	VAVAAAAVVAAVVAAVAAAT	F1MGT4	1464.87
0.999999	1	Heifer_3_Az1_RD3_01_451.02617.02617.2	1936-09-01	PGKPGPKGDPGPEGVGRPGKP	G3MXK9	1785.95
0.999999	1	Heifer_3_Az1_RD3_01_451.02621.02621.3	18/72	LARLSSSSSPQLLARKADPGQ	L8J3Z5	1940.04
0.999999	1	Heifer_3_Az1_RD3_01_451.02633.02633.3	1980-12-01	QKSEPSPQLSFHGLMMARLQGQL	F1N3N1	2341.17
0.999999	1	Heifer_3_Az1_RD3_01_451.02643.02643.2	1936-11-01	LTAAVIGSLICGLLLVIALGC	E1BN03	1853.11
0.999999	1	Heifer_3_Az1_RD3_01_451.02650.02650.3	23/52	MNGKDLSAGAVSAVRC	Q32LE5	1343.72
0.999999	1	Heifer_3_Az1_RD3_01_451.02654.02654.3	18/108	YMRPGSSKTPKLNQCLFMFNAILTPMLNPL	L8ITN9	3205.63
0.999999	1	Heifer_3_Az1_RD3_01_451.02655.02655.2	1938-12-01	LNNLAHLDIDKDVATPPCLGPE	G3N3S4	2159.07
0.999999	1	Heifer_3_Az1_RD3_01_451.02660.02660.2	13/26	PGIDGLTGAKGEPGPA	F1MDC2	1267.64
0.999999	1	Heifer_3_Az1_RD3_01_451.02665.02665.3	23/100	FVADKGAGNRVSLAALKKAVATRGYNMT	F1MMF6	2660.45
0.999999	1	Heifer_3_Az1_RD3_01_451.02670.02670.3	23/80	ASAASAAGPVHSSVPSNPVAAPG	L8IP36	1872.93
0.999999	1	Heifer_3_Az1_RD3_01_451.02681.02681.2	2028-12-01	GPSSACKPSRSTTGAPS	E1BLD1	1502.71
0.999999	1	Heifer_3_Az1_RD3_01_451.02685.02685.2	1944-10-01	AARAGPEGTSPPTPVPSTATGGPLE	E1BKN0	2117.08
0.999999	1	Heifer_3_Az1_RD3_01_451.02686.02686.3	23/76	KTEIISTVNHLDNTSEYCPEKG	F1N5Y0	2349.08
0.999999	1	Heifer_3_Az1_RD3_01_451.02689.02689.2	13/54	LKTKVADPGPGGTSGTAAALDGIGGALPKA	E1BN44	2506.34
0.999999	1	Heifer_3_Az1_RD3_01_451.02694.02694.2	1934-12-01	RGPGLSLPPPIGGAGPPLGL	Q1RML0	1552.86
0.999999	1	Heifer_3_Az1_RD3_01_451.02716.02716.3	21/112	YRMARGPWAEVHAVSLQTYKLWHLDPDTEYE	F1MD22	3468.7
0.999999	1	Heifer_3_Az1_RD3_01_451.02733.02733.2	1938-10-01	YLTSANIPSEAISGARVFQVKL	A3KN05	2087.14
0.999999	1	Heifer_3_Az1_RD3_01_451.02748.02748.3	23/152	YGGFGGRGGGFGGGLGVGGGSFGGGRFGGGGGFGGLGGPGG	G3MZ71	3114.46
0.999999	1	Heifer_3_Az1_RD3_01_451.02756.02756.3	22/116	DRALFNGAQKLFGMTITIGQSIVYVMTGMYGD	Q5EA68	3298.66
0.999999	1	Heifer_3_Az1_RD3_01_451.02759.02759.2	2028-10-01	QGLEKPKSLPFTTEEKY	F1MGY6	1702.91
0.999999	1	Heifer_3_Az1_RD3_01_451.02760.02760.3	23/104	GLVRGLKAGVLSQADYLNLVQCETLEDLK	P61420	3016.59
0.999999	1	Heifer_3_Az1_RD3_01_451.02761.02761.2	13/20	HATTATGDTALTY	F1MI56	1021.49
0.999999	1	Heifer_3_Az1_RD3_01_451.02771.02771.3	25/88	VSGMFTTESRLGGVRDELGGRGGPE	Q10569	2335.13
0.999999	1	Heifer_3_Az1_RD3_01_451.02775.02775.2	13/34	LLLLRGGIREGSLDLGPAPL	Q1LZD1	1833.05
0.999999	1	Heifer_3_Az1_RD3_01_451.02778.02778.3	21/116	GGLAGTRGGLSSSRGLYGGLQSPCSTAAPGPP	L8IHI5	2831.4
0.999999	1	Heifer_3_Az1_RD3_01_451.02787.02787.3	27/120	GSGGGGGGSGGNGVGGGGAGGAGGGGGGGSRAP	E1BMT1	2115.9
0.999999	1	Heifer_3_Az1_RD3_01_451.02808.02808.2	1938-12-01	DALDIDYELSFGGIPVPGKPGT	F1MYL5	2044.05
0.999999	1	Heifer_3_Az1_RD3_01_451.02815.02815.2	1942-12-01	SGAGGRGGARAGAGTEARAGPGAG	G3MXX8	1823.91
0.999999	1	Heifer_3_Az1_RD3_01_451.02818.02818.3	22/100	HVSTAATRLTNSHAMGSFSSGVAGGAVG	E1BGK8	2435.19
0.999999	1	Heifer_3_Az1_RD3_01_451.02822.02822.3	22/128	FYCDVPPVMCLVCAQSHRHEQSVLVAATLAIAVPF	G3MX23	3690.81
0.999999	1	Heifer_3_Az1_RD3_01_451.02827.02827.3	20/64	QGSPTTSPTPSADRLKPPA	L8J0H3	1707.88
0.999999	1	Heifer_3_Az1_RD3_01_451.02857.02857.2	13/42	RGKNGSDSETIRLPYEEGELLEYL	F1MFY8	2498.18
0.999999	1	Heifer_3_Az1_RD3_01_451.02881.02881.2	15/34	ALGALGSLVKSEPSGSPPAA	F1MIK5	1665.89
0.999999	1	Heifer_3_Az1_RD3_01_451.02887.02887.3	21/60	PLAKTAPKSGPSLPVSVQ	G3MYV5	1550.9
0.999999	1	Heifer_3_Az1_RD3_01_451.02894.02894.3	23/112	LERGATSQRHIDNPEDPAVNASVSMPLMFRG	Q2T9X8	3240.54
0.999999	1	Heifer_3_Az1_RD3_01_451.02900.02900.3	16/100	VQPQQGYIPPMAQPGLPPVPGAPGMPPG	F1MVH9	2637.31
0.999999	1	Heifer_3_Az1_RD3_01_451.02912.02912.3	16/84	EDKDDPTTGAWRAAYTIINGNPGQ	Q3B7N0	2332.11
0.999999	1	Heifer_3_Az1_RD3_01_451.02913.02913.2	1934-09-01	DPKEPLGSQRAASPTPKQPS	E1BMN9	1888.02
0.999999	1	Heifer_3_Az1_RD3_01_451.02917.02917.2	13/24	STAGGLAVGASSSRT	A6QQA2	1132.58
0.999999	1	Heifer_3_Az1_RD3_01_451.02920.02920.2	15/36	DGLPGPKGERGDPGPPGPPAY	F1N7Q7	1751.9
0.999999	1	Heifer_3_Az1_RD3_01_451.02925.02925.2	1932-06-01	QGSACEVTHRKNVPIDGKW	F1N102	1866.94
0.999999	1	Heifer_3_Az1_RD3_01_451.02937.02937.2	1934-11-01	NGIPNPSITWLKDGQPVNTA	E1BE11	1936.01
0.999999	1	Heifer_3_Az1_RD3_01_451.02938.02938.3	16/88	AGADEFLPLLSLVLAHCDLPELLLE	E1BDA1	2547.37
0.999999	1	Heifer_3_Az1_RD3_01_451.02963.02963.3	22/84	SPAVKSFYDRIKLLAGKDSTHIIP	F1MEX4	2471.39
0.999999	1	Heifer_3_Az1_RD3_01_451.02970.02970.3	17/104	PGVTSGIIISDSDKCVQMASLSLAHLAQS	F1N2X3	2816.4
0.999999	1	Heifer_3_Az1_RD3_01_451.02975.02975.2	1942-12-01	AVTPLCPGSGLGAMAGEGPPGGSG	A1L546	1983.9
0.999999	1	Heifer_3_Az1_RD3_01_451.02980.02980.3	18/112	LLTLDMLTVKVGEPKGYPPEDIFSLVGKKVL	Q1RMX7	3188.74
0.999999	1	Heifer_3_Az1_RD3_01_451.02989.02989.3	22/104	EKPHECSECGKLSHLTSLHTTHLGEKPYE	F1MHZ4	3145.51
0.999999	1	Heifer_3_Az1_RD3_01_451.03030.03030.2	1930-09-01	TIRVGEAFALTGRYSGKP	F1N757	1723.94
0.999999	1	Heifer_3_Az1_RD3_01_451.03034.03034.3	21/124	GPDGSASSQPTPGGGECRGGPMGPSWASGSRGDG	E1BPD8	3074.28
0.999999	1	Heifer_3_Az1_RD3_01_451.03035.03035.2	1938-11-01	LSGPGGAGSPQVILVSPPAQPS	F1N0E1	1814.95
0.999999	1	Heifer_3_Az1_RD3_01_451.03037.03037.3	18/100	GGPEASESHSGVALEGRRADASGGMLGC	G3MZU6	2513.16
0.999999	1	Heifer_3_Az1_RD3_01_451.03045.03045.2	14/36	LGPIGDKGQIGFPGTPGAPGQ	Q7SIB2	1721.87
0.999999	1	Heifer_3_Az1_RD3_01_451.03070.03070.3	16/68	PHLAGPHLGLESGNGGGVID	Q2KIB0	1683.87
0.999999	1	Heifer_3_Az1_RD3_01_451.03077.03077.2	13/42	ALGSLPVHGAQLQPSSTSGQSGQT	G3MXF1	2135.06
0.999999	1	Heifer_3_Az1_RD3_01_451.03078.03078.3	21/96	PTELSLEELSISARPPGPPALAPPTAT	G3X746	2513.34
0.999999	1	Heifer_3_Az1_RD3_01_451.03082.03082.3	24/80	MLGDAKIGNNSVSSLKNDDFTMR	F1MPU1	2225.06
0.999999	1	Heifer_3_Az1_RD3_01_451.03097.03097.2	13/46	EDEDQHADLTQSRRPLTGCTIFLGYT	Q6EWQ6	2792.32
0.999999	1	Heifer_3_Az1_RD3_01_451.03109.03109.3	15/84	HLVYSAHRPVAVAAGEFLYKKLFS	L8IX51	2478.38
0.999999	1	Heifer_3_Az1_RD3_01_451.03120.03120.3	27/72	RRALVGPGSPPPPPPPPPLPA	A5PKI1	1839.04
0.999999	1	Heifer_3_Az1_RD3_01_451.03144.03144.3	22/104	GFGGVGRMGGGGMGGMNSVTGGMGMGLDR	A6QQP0	2478.02
0.999999	1	Heifer_3_Az1_RD3_01_451.03157.03157.2	14/34	PGYQPTYNPTLPYHNPIPGG	Q3T0D6	2027.97
0.999999	1	Heifer_3_Az1_RD3_01_451.03162.03162.3	20/112	DGDQDGTTGSMDASTQGLLEGIGLDGDTLAP	E1BNY9	2794.25
0.999999	1	Heifer_3_Az1_RD3_01_451.03175.03175.3	19/96	RKGPRAESAAPPAGGGLGGRLAAGLRG	F1N3H6	2286.27
0.999999	1	Heifer_3_Az1_RD3_01_451.03176.03176.3	22/96	HWTLYMNVGGFLVGLFSSTLLGAWSDC	Q05B81	2749.35
0.999999	1	Heifer_3_Az1_RD3_01_451.03177.03177.3	17/120	SFWGQQPLVQQQIAMGAQPPVAQVMPGAQPIAW	L8I3T4	3285.68
0.999999	1	Heifer_3_Az1_RD3_01_451.03198.03198.2	2020-12-01	LGHGGLTAFSSSS	Q0III6	1019.47
0.999999	1	Heifer_3_Az1_RD3_01_451.03202.03202.3	19/72	RLPPPLLSPVPSPPLASPPHL	F1MS14	1912.08
0.999999	1	Heifer_3_Az1_RD3_01_451.03203.03203.2	1932-12-01	NSVSELIHYVGWLSTTAVR	A6QPS5	1860.96
0.999999	1	Heifer_3_Az1_RD3_01_451.03218.03218.3	12/120	TATDIDDEVNTYNAAIGYKILAQDPMLPHNKMF	A6QLC4	3492.65
0.999999	1	Heifer_3_Az1_RD3_01_451.03227.03227.2	14/40	PATAGNDAGAPTAPATGGEGEPH	F1MXZ6	1810.8
0.999999	1	Heifer_3_Az1_RD3_01_451.03238.03238.3	27/156	SGDGNSKSSLICQATDFSPKQISLSWFRDGKRIVSGISEGQV	G5E5T5	4355.16
0.999999	1	Heifer_3_Az1_RD3_01_451.03267.03267.3	20/92	LDNFIMWWESLLLLTAYFGYVVFMKF	E1BM98	3017.47
0.999999	1	Heifer_3_Az1_RD3_01_451.03268.03268.3	16/88	SVVEGAPPNLPQPRSPEHHLIPGQP	L8IV41	2468.29
0.999999	1	Heifer_3_Az1_RD3_01_451.03272.03272.3	19/68	PGLPGVPGSMGDMVNYDEIK	G3MXK9	1881.81
0.999999	1	Heifer_3_Az1_RD3_01_451.03280.03280.3	18/116	ADDALVEMHWVEGQNKGLMVQLCTYVHNQIFR	G3N1L9	3573.68
0.999999	1	Heifer_3_Az1_RD3_01_451.03281.03281.3	18/128	EIGLPGPPGLDGEKGPRGKPGDVGPPGPQGPPGKP	A7YY40	3081.64
0.999999	1	Heifer_3_Az1_RD3_01_451.03303.03303.3	21/120	PPPPPPPPAQAPPLHPYKCTMCNYSTTTLKGLR	F1MIB3	3430.69
0.999999	1	Heifer_3_Az1_RD3_01_451.03310.03310.2	14/54	LQALAAHSIANFPLQRFLDAITTPELLSPV	A5D7H7	3033.63
0.999999	1	Heifer_3_Az1_RD3_01_451.03319.03319.3	18/40	LIDRTGRMLKMEP	E1BLD1	1364.69
0.999999	1	Heifer_3_Az1_RD3_01_451.03322.03322.3	13/64	HRRAHAGGPCTEKPPAGPP	F1MU53	1757.87
0.999999	1	Heifer_3_Az1_RD3_01_451.03325.03325.3	18/104	LSTFAQPPPAQPPAPPASQLSGSQTGVSS	Q28199	2604.28
0.999999	1	Heifer_3_Az1_RD3_01_451.03365.03365.3	23/84	RDASKEELPGPGPDKERDMDLGPR	L8I992	2352.09
0.999999	1	Heifer_3_Az1_RD3_01_451.03394.03394.2	1936-11-01	LDELSEGAQVRRVDCTNLLPP	Q2T9R2	2171.06
0.999999	1	Heifer_3_Az1_RD3_01_451.03400.03400.2	1932-08-01	TFSEYTVMDEISVAKIDAA	Q2KII0	1916.91
0.999999	1	Heifer_3_Az1_RD3_01_451.03405.03405.3	22/80	CVWCQKTVHDECMKNSLRNEKCD	E1B7K6	2721.22
0.999999	1	Heifer_3_Az1_RD3_01_451.03424.03424.2	1946-12-01	LTTFDFSQYMKLDIAAVRALNLFQGS	Q3MHE4	2748.39
0.999999	1	Heifer_3_Az1_RD3_01_451.03426.03426.3	1976-09-01	SMPDLSKDSGMNVSEKLSNMGT	F1MHI6	2154.96
0.999999	1	Heifer_3_Az1_RD3_01_451.03440.03440.2	13/28	KLGCDWVATIFSRDIRF	L8IM15	1807.9
0.999999	1	Heifer_3_Az1_RD3_01_451.03445.03445.2	14/56	LDGKDASLVHTVTEQVVKIPVSSASASWKAA	G3N3W0	3009.58
0.999999	1	Heifer_3_Az1_RD3_01_451.03450.03450.3	22/88	KQGQTYGGGGLKTEMVSTNVRHSPP	L8IQB8	2419.16
0.999999	1	Heifer_3_Az1_RD3_01_451.03457.03457.2	15/26	DPPSGDFLTEGGGVRG	P02672	1387.67
0.999999	1	Heifer_3_Az1_RD3_01_451.03470.03470.2	1932-10-01	KYLLSMVVEYFGRVGLPGH	L8ITK1	1899
0.999999	1	Heifer_3_Az1_RD3_01_451.03476.03476.2	13/44	EKVQYRKEIMQHNRTDKAEADDCHR	F1MV84	2871.35
0.999999	1	Heifer_3_Az1_RD3_01_451.03477.03477.2	2028-11-01	FTALSVTHKSTQASGHR	F1N2S5	1523.77
0.999999	1	Heifer_3_Az1_RD3_01_451.03478.03478.2	1938-09-01	VSAGGKKDAVVPSGGFFPTIGM	E1BET7	1890.98
0.999999	1	Heifer_3_Az1_RD3_01_451.03485.03485.3	19/124	AWPRGSGPRAVQREAAELAARGPAAGAEEAAELA	E1BG70	3243.65
0.999999	1	Heifer_3_Az1_RD3_01_451.03495.03495.2	1936-12-01	DAELVDKSETDLRRLGELVHN	F1MGF2	2179.16
0.999999	1	Heifer_3_Az1_RD3_01_451.03508.03508.3	30/156	QGIQGPVSQGPLMGLNPRGMQGPPGPRENQGPAPQGMMLGHP	E1BCT7	4060.96
0.999999	1	Heifer_3_Az1_RD3_01_451.03512.03512.2	1932-09-01	EPSGKKAPTQPIQPAPGPA	A6H735	1669.92
0.999999	1	Heifer_3_Az1_RD3_01_451.03524.03524.2	2028-07-01	PLTPDLHYYYILELSFY	E1BP45	1885.95
0.999999	1	Heifer_3_Az1_RD3_01_451.03527.03527.3	22/112	AQAALGNLEKAMTDLKKVLAVDPKNRAAQRS	F1MXB0	3164.75
0.999999	1	Heifer_3_Az1_RD3_01_451.03532.03532.2	1930-09-01	AAVWGSPGQPGEPGYAKD	G3MXE4	1599.77
0.999999	1	Heifer_3_Az1_RD3_01_451.03537.03537.3	15/80	GPPDEAVCRENVSQIYCTLLDCL	Q28205	2538.12
0.999999	1	Heifer_3_Az1_RD3_01_451.03552.03552.3	22/124	KNMELSFAVQRSADKVCGICMEVVYEKANRNDCR	Q52UL3	3808.71
0.999999	1	Heifer_3_Az1_RD3_01_451.03557.03557.3	14/96	PMRPPAFLQQGMMGPHHRMMSPAQSTM	E1BPF3	2855.29
0.999999	1	Heifer_3_Az1_RD3_01_451.03560.03560.3	25/160	YRHFGGEIFEDSFEFVLWDSHEPPNLSVPQVVTIHVTPVNDQL	E1BN52	4717.29
0.999999	1	Heifer_3_Az1_RD3_01_451.03561.03561.2	15/50	VHEGCRVGEEAPPPTGTEKRLVARTGKK	A6QQS9	2831.45
0.999999	1	Heifer_3_Az1_RD3_01_451.03562.03562.3	20/84	AKELVEIAVPENLVGAILGKGGKT	L8IMA2	2233.3
0.999999	1	Heifer_3_Az1_RD3_01_451.03568.03568.3	18/104	RLGYETYLSSGGHGSTSPTTLDWGQPAGW	E1BDC4	2738.25
0.999999	1	Heifer_3_Az1_RD3_01_451.03571.03571.2	1940-09-01	KNACLTPAAAFPGQPQAVIMTSG	E1BIZ7	2160.03
0.999999	1	Heifer_3_Az1_RD3_01_451.03577.03577.3	22/112	NSVPDQHTLSQNFGFPFIPEGGMNPPINANA	F1MBF2	3140.47
0.999999	1	Heifer_3_Az1_RD3_01_451.03582.03582.3	25/136	LSLDCGHTFCQACITGNNKESIIGQEGKRSCPVCRVS	Q27U16	4037.84
0.999999	1	Heifer_3_Az1_RD3_01_451.03605.03605.3	17/112	QEGRLQRPEQPRQQARYDAVDNDIVQGAEDQ	G3MWN4	3352.61
0.999999	1	Heifer_3_Az1_RD3_01_451.03617.03617.3	22/52	LIDQTRVLNLGPITRK	P48733	1594.92
0.999999	1	Heifer_3_Az1_RD3_01_451.03622.03622.2	14/44	STVTSVTTASTSTDSAPKPSFSFGV	L8ITF1	2275.09
0.999999	1	Heifer_3_Az1_RD3_01_451.03626.03626.3	16/120	EKKLSSMESPKPQASEAARSTSLTPSASSPTLH	L8J506	3173.62
0.999999	1	Heifer_3_Az1_RD3_01_451.03630.03630.2	13/44	EGVVGAVEKTKQGVTEAAEKTKEGV	Q9NZ50	2315.23
0.999999	1	Heifer_3_Az1_RD3_01_451.03634.03634.3	13/96	TQDSSMSMAQSPPVPARKNQLRAEEEK	L8IPW3	2817.3
0.999999	1	Heifer_3_Az1_RD3_01_451.03637.03637.3	24/152	VLVNTDSLETSTYVNGTDADYEYEEITLERGNSGLGFSIAG	L8IHB4	4242.96
0.999999	1	Heifer_3_Az1_RD3_01_451.03660.03660.3	17/140	MGPGSDGPMGGLGGMESHHMNGSLGSGDMDSISKNSPN	Q3MHW3	3488.43
0.999999	1	Heifer_3_Az1_RD3_01_451.03669.03669.3	20/76	QEYLRAVMQKRISFRSAEERKD	Q0V8C2	2512.33
0.999999	1	Heifer_3_Az1_RD3_01_451.03673.03673.3	26/148	LIPKMLDGFLLQRRRISFVGCMTQLYFFSSLVCTECVLLA	G5E544	4613.35
0.999999	1	Heifer_3_Az1_RD3_01_451.03701.03701.3	17/124	PTLWEEQRQQRMTVAFEFEEKKEDDENAGKVKDH	F1MCA7	3928.85
0.999999	1	Heifer_3_Az1_RD3_01_451.03718.03718.2	1940-09-01	QGTPSAGSQPGAQSGTSPGQPPA	L8J566	1864.86
0.999999	1	Heifer_3_Az1_RD3_01_451.03721.03721.3	20/108	AWNLFELTITLVGIIDVMLIETNSINYYIF	F1MQF9	3299.74
0.999999	1	Heifer_3_Az1_RD3_01_451.03725.03725.3	24/128	SILVLCQAGSLQATPLRSALETLPDPGALSEKEGR	B5UBG1	3433.81
0.999999	1	Heifer_3_Az1_RD3_01_451.03727.03727.2	2028-07-01	FIDHDRPMNTLTLTGQF	F1MB52	1726.83
0.999999	1	Heifer_3_Az1_RD3_01_451.03758.03758.2	1940-09-01	SKGMAVIGVAFSLGFTLGPTLGA	Q0P5M9	2035.12
0.999999	1	Heifer_3_Az1_RD3_01_451.03759.03759.3	22/80	FCIAAAINVFGAIFFTLFAKGEV	L8I522	2259.18
0.999999	1	Heifer_3_Az1_RD3_01_451.03768.03768.2	13/46	MPGLQGVPGHNGLPGQPGLTAELGSL	G3MXK9	2252.15
0.999999	1	Heifer_3_Az1_RD3_01_451.03781.03781.3	18/72	AALDADCRLKQNLCLAGPGPA	Q08DW9	2068.02
0.999999	1	Heifer_3_Az1_RD3_01_451.03782.03782.3	21/124	SGQSRHRDSSVSDASDSKGYTGDVGRHSVTSQGR	F1MJB5	3319.52
0.999999	1	Heifer_3_Az1_RD3_01_451.03785.03785.3	27/140	LAGGSCAIGGGYGGRIGVGYGFGGGAGSGFGFGAGAGS	L8HW76	3039.37
0.999999	1	Heifer_3_Az1_RD3_01_451.03788.03788.3	21/68	SRTSGSPSEGLGRTGSTAGL	O62672	1676.81
[truncated: 3,240 more rows]

## Sheet: Pregnant
iprobability	probability	spectrum ID	ions	peptide	UniProt Protein ID	calc_neutral_pep_mass
0.999999	1	10ul_Azm_Preg1_30dec18_RD1_01_501.02092.02092.3	1952-09-01	TVRDGSPPVGSNGASK	G3N1E4	1298.62
0.999999	1	10ul_Azm_Preg1_30dec18_RD1_01_501.02437.02437.3	13/60	ATFCQIFGFLLFVSNSVS	Q2KI97	1877.94
0.999999	1	10ul_Azm_Preg1_30dec18_RD1_01_501.02552.02552.3	19/48	LYYSKNPAMMEKSIF	G3N1E5	1592.72
0.999999	1	10ul_Azm_Preg1_30dec18_RD1_01_501.02608.02608.3	13/68	QLTDSGFKGMAAGLIPDRIR	F1MKY9	1860.98
0.999999	1	10ul_Azm_Preg1_30dec18_RD1_01_501.02859.02859.3	13/100	NPGNLKPPAAGGLSALGSPPQQLSAATP	E1BNQ7	2399.28
0.999999	1	10ul_Azm_Preg1_30dec18_RD1_01_501.02867.02867.3	15/104	RSVHTGEKPYKCDVCGKAFSHTGNLAVHR	F1MX34	2998.42
0.999999	1	10ul_Azm_Preg1_30dec18_RD1_01_501.02975.02975.3	19/100	KESLSVSSSSSASSSSGSSTTSPSSSAS	F1N6Y5	2336.99
0.999999	1	10ul_Azm_Preg1_30dec18_RD1_01_501.03101.03101.3	20/80	GQGEDLRKFILAALSASHRNVVN	F1ML56	2323.28
0.999999	1	10ul_Azm_Preg1_30dec18_RD1_01_501.03157.03157.3	11/124	TGAGPAGRYDQATDTILTVTYFIFSSMGDAGEMV	F1MDH3	3357.52
0.999999	1	10ul_Azm_Preg1_30dec18_RD1_01_501.03314.03314.3	11/124	PFDPDAIRDLILQLDYPYTQGSQDSALLQLIELR	L8I0X8	3662.87
0.999999	1	10ul_Azm_Preg1_30dec18_RD1_01_501.03393.03393.3	1980-12-01	FFSLYSNMQIYRMIGRLLRNTEK	Q2TBW4	2620.33
0.999999	1	10ul_Azm_Preg1_30dec18_RD1_01_501.03495.03495.3	13/100	ALLSVGADAVFGPEGSPWEGRLRFQMLS	F1MJ00	2847.44
0.999999	1	10ul_Azm_Preg1_30dec18_RD1_01_501.03551.03551.3	13/52	VVAGVSAILGGVIALN	G5E5R7	1238.76
0.999999	1	10ul_Azm_Preg1_30dec18_RD1_01_501.03627.03627.3	14/48	MLKTVKTVKADVDRL	L8IX67	1471.87
0.999999	1	10ul_Azm_Preg1_30dec18_RD1_01_501.03754.03754.3	14/88	VFEDSEELAVQLQTLFSKFPDPAGK	F1N2J7	2567.24
0.999999	1	10ul_Azm_Preg1_30dec18_RD1_01_501.03848.03848.3	13/100	PMIKEASMAKYHASELAGLITSKCIEWM	Q5EAD4	2966.47
0.999999	1	10ul_Azm_Preg1_30dec18_RD1_01_501.04016.04016.3	18/124	GGGGGGGGGGAPVCGASGLCKTNCGVCCKAELGL	Q2VWH6	2981.27
0.999999	1	10ul_Azm_Preg1_30dec18_RD1_01_501.04025.04025.3	13/40	VPEHPDVHLCNCG	E1BDK1	1376.56
0.999999	1	10ul_Azm_Preg1_30dec18_RD1_01_501.04072.04072.3	14/56	LLFSCLLLVVCLIFSIM	L8IPR0	1796
0.999999	1	10ul_Azm_Preg1_30dec18_RD1_01_501.04186.04186.3	15/92	EMLERKYGGRLVTRHAARTIQTAFRQ	F1MYE9	2846.56
0.999999	1	10ul_Azm_Preg1_30dec18_RD1_01_501.04209.04209.3	16/76	NYMAFLDSQTATFSRHKKRLLV	E1BBQ3	2428.27
0.999999	1	10ul_Azm_Preg1_30dec18_RD1_01_501.04322.04322.3	22/92	PPRVMLRCKGQSPGATAGSSVVVRVP	E1BAR6	2511.35
0.999999	1	10ul_Azm_Preg1_30dec18_RD1_01_501.04353.04353.3	15/64	RGGATVKVSASSPSLAAAS	Q3T0X1	1472.78
0.999999	1	10ul_Azm_Preg1_30dec18_RD1_01_501.04364.04364.3	21/72	LATVGGNLLVIVAIARTPRLQ	P46626	1933.18
0.999999	1	10ul_Azm_Preg1_30dec18_RD1_01_501.04396.04396.3	15/112	VVLNILQDRNRTTEGMTSNSLVAETNITSIE	A5PK21	3189.63
0.999999	1	10ul_Azm_Preg1_30dec18_RD1_01_501.04515.04515.3	1956-10-01	LALLGPGSSHQLGETST	F1MS77	1452.72
0.999999	1	10ul_Azm_Preg1_30dec18_RD1_01_501.04558.04558.3	14/60	MAGGVDGPIGIPFPDHSS	E1BIJ8	1534.74
0.999999	1	10ul_Azm_Preg1_30dec18_RD1_01_501.04618.04618.3	17/52	LDVKAGGGCVMTIGEM	G3N166	1408.63
0.999999	1	10ul_Azm_Preg1_30dec18_RD1_01_501.04655.04655.3	23/124	AERKLGPDSSARTPGESSAISMGIVSVSSPDVSS	E1BLD1	3218.57
0.999999	1	10ul_Azm_Preg1_30dec18_RD1_01_501.04679.04679.3	1948-09-01	GGLVLGMASMYDGSA	L8IL34	1315.58
0.999999	1	10ul_Azm_Preg1_30dec18_RD1_01_501.04781.04781.3	15/48	VGRGDSLHLHVSKPP	Q1LZC3	1401.75
0.999999	1	10ul_Azm_Preg1_30dec18_RD1_01_501.04888.04888.3	14/52	QDLGSMSSLGPGISGP	F1MJZ7	1292.59
0.999999	1	10ul_Azm_Preg1_30dec18_RD1_01_501.04910.04910.3	14/52	YAPGAGSLALFPGIRL	Q0VCN6	1325.75
0.999999	1	10ul_Azm_Preg1_30dec18_RD1_01_501.04979.04979.3	14/48	PNWAAKSGKFDCSIM	L8HXX6	1482.69
0.999999	1	10ul_Azm_Preg1_30dec18_RD1_01_501.05047.05047.3	18/52	LYSPVTPVTPGTPGNT	F1MFD2	1385.68
0.999999	1	10ul_Azm_Preg1_30dec18_RD1_01_501.05206.05206.3	14/36	FCSYIFSHSKTK	Q0IID3	1228.55
0.999999	1	10ul_Azm_Preg1_30dec18_RD1_01_501.05280.05280.3	14/64	MTPAPKEAVTGNGIGGKMK	A1L503	1626.84
0.999999	1	10ul_Azm_Preg1_30dec18_RD1_01_501.05331.05331.3	15/48	KCMGLLIGRGGLFSQ	Q17QF0	1379.71
0.999999	1	10ul_Azm_Preg1_30dec18_RD1_01_501.05362.05362.3	1944-12-01	FMAFVAMITTACHE	P02638	1351.61
0.999999	1	10ul_Azm_Preg1_30dec18_RD1_01_501.05403.05403.3	1948-11-01	LPARVNFSAAPAPAP	F1N1R9	1267.67
0.999999	1	10ul_Azm_Preg1_30dec18_RD1_01_501.05475.05475.3	1948-11-01	ASMASGSAKMTSFAE	F1MYW2	1290.56
0.999999	1	10ul_Azm_Preg1_30dec18_RD1_01_501.05518.05518.3	19/52	QCCGTRPQAQSGKDAE	E1BN60	1534.66
0.999999	1	10ul_Azm_Preg1_30dec18_RD1_01_501.05670.05670.3	1940-11-01	GRMALESQGPGCT	L8HSR7	1204.53
0.999999	1	10ul_Azm_Preg1_30dec18_RD1_01_501.05745.05745.3	17/48	TEVKRRYLDWRALMK	Q2KJB9	1750.93
0.999999	1	10ul_Azm_Preg1_30dec18_RD1_01_501.05764.05764.3	13/60	QYKPDSSSVPGKALHDEG	L8I5M3	1728.83
0.999999	1	10ul_Azm_Preg1_30dec18_RD1_01_501.05835.05835.3	15/44	LIMEYRLSQACMKG	Q2HJ73	1560.71
0.999999	1	10ul_Azm_Preg1_30dec18_RD1_01_501.05856.05856.3	13/56	LLSLGPRAAGAEGLTST	L8ILI0	1398.75
0.999999	1	10ul_Azm_Preg1_30dec18_RD1_01_501.05875.05875.3	16/72	QPGAGTVLAGASGLQQVQMAG	F1MMX8	1770.89
0.999999	1	10ul_Azm_Preg1_30dec18_RD1_01_501.05889.05889.3	16/60	PAPKEAVTGNGIGGKMKL	A1L503	1572.83
0.999999	1	10ul_Azm_Preg1_30dec18_RD1_01_501.06004.06004.3	20/68	NVLFHRMSIGLASALKVSQD	E1BK86	1956.1
0.999999	1	10ul_Azm_Preg1_30dec18_RD1_01_501.06111.06111.3	15/52	RLGLLLLSLSQGQECE	E1BAL6	1529.81
0.999999	1	10ul_Azm_Preg1_30dec18_RD1_01_501.06205.06205.3	16/64	VMVSIIFAVIAGIVGIIVG	A4PJ02	1730.04
0.999999	1	10ul_Azm_Preg1_30dec18_RD1_01_501.06277.06277.3	1944-11-01	SEHPNVVLNSSYVC	A8KC64	1356.67
0.999999	1	10ul_Azm_Preg1_30dec18_RD1_01_501.06458.06458.3	17/56	PASPPLSSTSPTTTAAT	Q08DK5	1387.68
0.999999	1	10ul_Azm_Preg1_30dec18_RD1_01_501.06877.06877.3	15/52	KQMEKMTISSAKTVTQ	E1B9S6	1553.78
0.999999	1	10ul_Azm_Preg1_30dec18_RD1_01_501.06923.06923.3	13/40	EDTVSSIRPVPEA	E1BBW2	1198.62
0.999999	1	10ul_Azm_Preg1_30dec18_RD1_01_501.07059.07059.3	20/52	FSTCSSHISAVTIFYG	L8I5H2	1571.73
0.999999	1	10ul_Azm_Preg1_30dec18_RD1_01_501.07270.07270.3	15/48	RCNQEKIVTIHYSLN	F1MB90	1603.8
0.999999	1	10ul_Azm_Preg1_30dec18_RD1_01_501.07292.07292.3	15/52	YMHSEGILAGELKHGP	Q08DQ2	1493.73
0.999999	1	10ul_Azm_Preg1_30dec18_RD1_01_501.07316.07316.3	21/68	VQPAQHVYPAQLQYVEGGDA	A6QLW9	1998.94
0.999999	1	10ul_Azm_Preg1_30dec18_RD1_01_501.07434.07434.3	14/44	SDEDGSSDESEEGK	F1MQ85	1254.4
0.999999	1	10ul_Azm_Preg1_30dec18_RD1_01_501.07605.07605.3	12/148	ASACAPPGPPLQPPRSPAAVRADKARAPAQPLLLPAASIE	E1BNA0	3809.09
0.999999	1	10ul_Azm_Preg1_30dec18_RD1_01_501.07686.07686.3	18/108	LDLLGRCAPEMHLIHAAKGEAIRIRSILRS	E1BHV1	3211.75
0.999999	1	10ul_Azm_Preg1_30dec18_RD1_01_501.07747.07747.3	14/68	LYSASWGPDDDGKTVDGPGR	L8IXP9	1822.76
0.999999	1	10ul_Azm_Preg1_30dec18_RD1_01_501.07783.07783.3	15/56	CPLLGQEAPGCPAKALL	F1MFU7	1520.8
0.999999	1	10ul_Azm_Preg1_30dec18_RD1_01_501.07829.07829.3	18/116	DVGRSSYGAMQVKQAFDYAYVVLSHAVSPIAK	L8I5B9	3213.63
0.999999	1	10ul_Azm_Preg1_30dec18_RD1_01_501.07838.07838.3	13/52	TTPVAPNPASSPANCA	L8ILF1	1381.63
0.999999	1	10ul_Azm_Preg1_30dec18_RD1_01_501.07960.07960.3	17/92	EFHEIHSTGNEPPLLIMIGYSDGMQV	A6QQI6	2717.25
0.999999	1	10ul_Azm_Preg1_30dec18_RD1_01_501.08020.08020.3	15/48	CKDCGKAFSASNSLL	Q2HJ70	1383.65
0.999999	1	10ul_Azm_Preg1_30dec18_RD1_01_501.08227.08227.3	13/48	QKVVEIAPAAHLDPQ	Q29RK2	1358.76
0.999999	1	10ul_Azm_Preg1_30dec18_RD1_01_501.08292.08292.3	1940-09-01	LPPRSTLQHPDYL	F1N758	1309.64
0.999999	1	10ul_Azm_Preg1_30dec18_RD1_01_501.09130.09130.3	16/80	QRLDMDGDGQVDFDEFMTILGPK	E1BDZ7	2386.05
0.999999	1	10ul_Azm_Preg1_30dec18_RD1_01_501.09224.09224.3	16/80	VKPAAGLPNHSVKTAQSLHLQRS	A6QPU2	2252.25
0.999999	1	10ul_Azm_Preg1_30dec18_RD1_01_501.09281.09281.3	20/68	YAWMMNVFSVVMAYSITCPL	L8ICT4	2121.94
0.999999	1	10ul_Azm_Preg1_30dec18_RD1_01_501.09427.09427.3	20/96	TTIAHKMNLSLYLGERPSYSMSGPNSS	F1N4A6	2768.33
0.999999	1	10ul_Azm_Preg1_30dec18_RD1_01_501.09513.09513.3	1956-12-01	VGVVPGVGVASGIGLGP	A6QPK6	1237.7
0.999999	1	10ul_Azm_Preg1_30dec18_RD1_01_501.09710.09710.3	19/64	NVRFRKDAEPCLQGPLYNV	F1MIH5	2062.04
0.999999	1	10ul_Azm_Preg1_30dec18_RD1_01_501.09881.09881.3	21/84	NIFISLVEPGPVVTEFEGKLLEQV	Q9N126	2443.32
0.999999	1	10ul_Azm_Preg1_30dec18_RD1_01_501.09885.09885.3	23/80	PTQQRSAPDISFTIDANKQQRQL	L8IXB2	2431.22
0.999999	1	10ul_Azm_Preg1_30dec18_RD1_01_501.09917.09917.3	15/72	GELRNLADQGIINYPYSTREV	G3N1G4	2251.12
0.999999	1	10ul_Azm_Preg1_30dec18_RD1_01_501.10080.10080.3	19/76	EQKRLHSRAQKLFSVLSHSAGE	E1BK28	2249.25
0.999999	1	10ul_Azm_Preg1_30dec18_RD1_01_501.10269.10269.3	16/48	AFVITKCCLFCYQKF	F1MFF6	1765.84
0.999999	1	10ul_Azm_Preg1_30dec18_RD1_01_501.10272.10272.3	22/104	LAGQGGLLGGGGLLGDGGLLGGGGVLGVL	F1MQW0	2177.18
0.999999	1	10ul_Azm_Preg1_30dec18_RD1_01_501.10431.10431.3	15/56	YLLEHAPTEILDAVEEK	G5E5G8	1677.85
0.999999	1	10ul_Azm_Preg1_30dec18_RD1_01_501.10562.10562.3	20/84	CGLVNSMTHTVLATTLTLCGPNQL	G3MX96	2343.16
0.999999	1	10ul_Azm_Preg1_30dec18_RD1_01_501.10647.10647.3	18/72	SRPTELSLEELSISARPPGPP	G3X746	2048.09
0.999999	1	10ul_Azm_Preg1_30dec18_RD1_01_501.10669.10669.3	1952-11-01	GFGFVILTSKSKPPPG	L8J384	1516.87
0.999999	1	10ul_Azm_Preg1_30dec18_RD1_01_501.10712.10712.3	1940-10-01	LPVDTTASHVCEG	L8HYM0	1214.52
0.999999	1	10ul_Azm_Preg1_30dec18_RD1_01_501.10725.10725.3	13/48	TRLERHLAPEVFREL	L8IA97	1650.9
0.999999	1	10ul_Azm_Preg1_30dec18_RD1_01_501.10733.10733.3	20/68	ALTLPRPRIVSLLSSHAHHS	F1MIB3	2033.16
0.999999	1	10ul_Azm_Preg1_30dec18_RD1_01_501.10754.10754.3	1948-09-01	AVTGYKDPYSGSTIS	E1BF59	1386.67
0.999999	1	10ul_Azm_Preg1_30dec18_RD1_01_501.10808.10808.3	19/72	TEDCSLAAAKAIQGLRAVFDE	L8IPC0	2034.02
0.999999	1	10ul_Azm_Preg1_30dec18_RD1_01_501.10831.10831.3	15/64	GIATGSHSSYSGSFSSCAG	F1N754	1704.7
0.999999	1	10ul_Azm_Preg1_30dec18_RD1_01_501.10835.10835.3	13/48	PALHLPELEREEEKE	E1B8H0	1591.82
0.999999	1	10ul_Azm_Preg1_30dec18_RD1_01_501.10848.10848.3	17/64	QGHSARSKRSAYPSTSRGL	Q6H236	1803.91
0.999999	1	10ul_Azm_Preg1_30dec18_RD1_01_501.10868.10868.3	22/132	VDPYDMPGTSYSTPGMSGYSSGGASGSGGPSTSGTT	A6QLQ3	3191.25
0.999999	1	10ul_Azm_Preg1_30dec18_RD1_01_501.10882.10882.3	18/84	AAMVSAAGPGSGSGMGGGSATSGP	Q08E34	1768.74
0.999999	1	10ul_Azm_Preg1_30dec18_RD1_01_501.10991.10991.3	1940-09-01	QKPLSKELTLGNL	A3KN19	1198.69
0.999999	1	10ul_Azm_Preg1_30dec18_RD1_01_501.11023.11023.3	17/52	LVFSSSATVYGNPQYL	Q3T105	1518.7
0.999999	1	10ul_Azm_Preg1_30dec18_RD1_01_501.11048.11048.3	15/56	DRYVAICNPLLYMAVVS	G5E5X6	1796.93
0.999999	1	10ul_Azm_Preg1_30dec18_RD1_01_501.11138.11138.3	1956-12-01	ENAPVPNSLRCELLLAL	E1BAS5	1665.89
0.999999	1	10ul_Azm_Preg1_30dec18_RD1_01_501.11256.11256.3	14/52	KQPPPQPALPYNHIYQ	L8J1F4	1633.83
0.999999	1	10ul_Azm_Preg1_30dec18_RD1_01_501.11368.11368.3	18/72	AENIRYGRGNVTMDEIQQAVK	E1BLT5	2192.06
0.999999	1	10ul_Azm_Preg1_30dec18_RD1_01_501.11391.11391.3	18/76	RIRLGGPEPWRGPPSPRAPPEL	F1N0K8	2165.15
0.999999	1	10ul_Azm_Preg1_30dec18_RD1_01_501.11428.11428.3	15/48	CENIKTLGTLKGFQE	E1BF32	1447.8
0.999999	1	10ul_Azm_Preg1_30dec18_RD1_01_501.11472.11472.3	16/68	RLLDSVPPAAIGHFEQSAEN	G3N2S5	1879.93
0.999999	1	10ul_Azm_Preg1_30dec18_RD1_01_501.11596.11596.3	13/40	GRVSSLLTVEQRP	G3N052	1286.73
0.999999	1	10ul_Azm_Preg1_30dec18_RD1_01_501.11634.11634.3	17/80	HGSYGDAAEEMDWSVGQILDVLD	Q19AM0	2254.01
0.999999	1	10ul_Azm_Preg1_30dec18_RD1_01_501.12006.12006.3	15/80	PILGGQMLHTVLSMVGLSLIALG	L8IPR0	2181.23
0.999999	1	10ul_Azm_Preg1_30dec18_RD1_01_501.12016.12016.3	15/56	VFHQATRDVIIKETQAP	Q3MHI2	1755.93
0.999999	1	10ul_Azm_Preg1_30dec18_RD1_01_501.12031.12031.3	14/56	GLPGAGAGRGGHVLQTQ	E7DB45	1389.75
0.999999	1	10ul_Azm_Preg1_30dec18_RD1_01_501.12059.12059.3	13/52	NSVINVSLHGLLSHCS	F1MTR6	1534.79
0.999999	1	10ul_Azm_Preg1_30dec18_RD1_01_501.12077.12077.3	25/68	QRYLYSASMLAAENDPYGPL	Q32PG0	2032.92
0.999999	1	10ul_Azm_Preg1_30dec18_RD1_01_501.12192.12192.3	14/64	SKELSAGSQFVGLTAFLTA	U5NLW9	1767.94
0.999999	1	10ul_Azm_Preg1_30dec18_RD1_01_501.12194.12194.3	1948-12-01	KASDPGLFAVGLHTG	F1N3M3	1283.65
0.999999	1	10ul_Azm_Preg1_30dec18_RD1_01_501.12279.12279.3	16/60	FSKILHKLSAPLKPRVPE	F1N0S4	1783.12
0.999999	1	10ul_Azm_Preg1_30dec18_RD1_01_501.12284.12284.3	1944-12-01	GKLVQVNSRFNSPT	L8IZR5	1387.76
0.999999	1	10ul_Azm_Preg1_30dec18_RD1_01_501.12293.12293.3	17/52	SALMFPTYKYQNPYGF	O18767	1707.8
0.999999	1	10ul_Azm_Preg1_30dec18_RD1_01_501.12300.12300.3	19/68	WRFRKEQAQGKVNVFGRKLR	E1BMG7	2160.24
0.999999	1	10ul_Azm_Preg1_30dec18_RD1_01_501.12305.12305.3	1960-11-01	SVEVTYPDGKAEILCMGN	Q9Y4G8	1780.84
0.999999	1	10ul_Azm_Preg1_30dec18_RD1_01_501.12360.12360.3	1944-11-01	PKKKSAFSCPIQLS	G5E6T2	1405.78
0.999999	1	10ul_Azm_Preg1_30dec18_RD1_01_501.12410.12410.3	13/60	TLCPMVDVGKDVMTESES	L8IT66	1840.79
0.999999	1	10ul_Azm_Preg1_30dec18_RD1_01_501.12426.12426.3	15/52	AKISQIPPASAMDIEF	E1BNF6	1498.77
0.999999	1	10ul_Azm_Preg1_30dec18_RD1_01_501.12507.12507.3	16/64	HGFAPYFYTPAPPGFGPEH	P28339	1813.84
0.999999	1	10ul_Azm_Preg1_30dec18_RD1_01_501.12565.12565.3	19/72	PQVLNAWSIGRENLGPGQERP	E1BDV5	2123.09
0.999999	1	10ul_Azm_Preg1_30dec18_RD1_01_501.12650.12650.3	14/76	LASTVSSTMTMSSGVAMSSSVA	L8IR96	1906.83
0.999999	1	10ul_Azm_Preg1_30dec18_RD1_01_501.12663.12663.3	13/48	KKRGTGTLASLATEP	G3X6V1	1303.71
0.999999	1	10ul_Azm_Preg1_30dec18_RD1_01_501.12665.12665.3	16/72	EPASPGGEGEAGLALAPNECD	F1MVT6	1795.8
0.999999	1	10ul_Azm_Preg1_30dec18_RD1_01_501.12668.12668.3	19/76	YCFAGKTSSISDLKEVPRKNIT	F1MUQ3	2249.18
0.999999	1	10ul_Azm_Preg1_30dec18_RD1_01_501.12697.12697.3	20/60	DVPRRISDEDTSTSDFCL	E1BAC1	1883.83
0.999999	1	10ul_Azm_Preg1_30dec18_RD1_01_501.12698.12698.3	18/60	SFPFLEDLVKVENNMVSL	Q0P566	1895.93
0.999999	1	10ul_Azm_Preg1_30dec18_RD1_01_501.12755.12755.3	18/56	GSRPVVMVGGLLCCLGM	L8ID28	1616.82
0.999999	1	10ul_Azm_Preg1_30dec18_RD1_01_501.12776.12776.3	18/52	QDMLTVEDFDVSDAFQ	F1MJI3	1618.67
0.999999	1	10ul_Azm_Preg2_30dec18_RD2_01_503.02427.02427.3	13/64	QLVEMLDMSVPAVAKLRRL	Q3SX23	1943.07
0.999999	1	10ul_Azm_Preg2_30dec18_RD2_01_503.02584.02584.3	14/72	VGLMQLFSDYKEDLKPLLDTL	P56966	2241.12
0.999999	1	10ul_Azm_Preg2_30dec18_RD2_01_503.02674.02674.3	13/88	QLQESQQMLGRLIPEKQILNDQLKQ	G3N0W1	2721.48
0.999999	1	10ul_Azm_Preg2_30dec18_RD2_01_503.02675.02675.3	19/64	FQLKKIGELENRSCQLYKA	Q58CW6	2106.13
0.999999	1	10ul_Azm_Preg2_30dec18_RD2_01_503.02723.02723.3	22/84	EETLLNVIKSVTRNGRSIILMAVL	Q9TU34	2442.4
0.999999	1	10ul_Azm_Preg2_30dec18_RD2_01_503.02729.02729.3	14/96	AAPPAGLLGSGGGFKACSVAGSWVCPR	G3X7Q0	2402.15
0.999999	1	10ul_Azm_Preg2_30dec18_RD2_01_503.02804.02804.3	20/92	LIALALLGNISSIAFFNFAGISVTKE	A4IFE7	2466.39
0.999999	1	10ul_Azm_Preg2_30dec18_RD2_01_503.02843.02843.3	20/84	HPQDSMELVHKQSKAVAVTSMSFP	Q0III3	2419.19
0.999999	1	10ul_Azm_Preg2_30dec18_RD2_01_503.02887.02887.3	17/80	PPQDSPYGRYRSPDPLLSIFVTQ	Q32L96-2	2407.22
0.999999	1	10ul_Azm_Preg2_30dec18_RD2_01_503.02890.02890.3	18/76	RHCLKMSKVAESLIAYTEQYME	L8IN33	2417.14
0.999999	1	10ul_Azm_Preg2_30dec18_RD2_01_503.02960.02960.3	13/104	YPNNSVFNEVYGKNLTTSSKAELNPSVAP	F1N4M5	2879.43
0.999999	1	10ul_Azm_Preg2_30dec18_RD2_01_503.03083.03083.3	18/92	EEQPTQEGLDENAQASQSPSGSGVGG	Q9GLR1	2372.04
0.999999	1	10ul_Azm_Preg2_30dec18_RD2_01_503.03131.03131.3	20/80	KATLKEFMEKLAGAEEHQRAVAA	L8J4M3	2344.18
0.999999	1	10ul_Azm_Preg2_30dec18_RD2_01_503.03136.03136.3	21/112	AVAVVVVVVSAVAWAMANYIHVPPGSPEVPK	F1N378	2972.58
0.999999	1	10ul_Azm_Preg2_30dec18_RD2_01_503.03159.03159.3	23/88	FNPESQAIPLMSVASVTAGKAKKPT	G3X6Z1	2323.26
0.999999	1	10ul_Azm_Preg2_30dec18_RD2_01_503.03173.03173.3	20/92	AVSDGPAMMLAAVLLVRATAANMSGT	P27214-2	2345.19
0.999999	1	10ul_Azm_Preg2_30dec18_RD2_01_503.03189.03189.3	23/88	DLYDYMNSLKELLKIKAKVIYPGHG	Q1LZ83	2735.51
0.999999	1	10ul_Azm_Preg2_30dec18_RD2_01_503.03233.03233.3	21/76	WIGLSLVVLFILLSLGISGWCF	Q148K3	2159.24
0.999999	1	10ul_Azm_Preg2_30dec18_RD2_01_503.03245.03245.3	18/68	APKDFLEVLINLRNPNYESG	Q08DJ1	2160.12
0.999999	1	10ul_Azm_Preg2_30dec18_RD2_01_503.03253.03253.3	22/92	MLGQPISMVLPQVIGYRLVGNPHPLV	Q0VCU1	2597.45
0.999999	1	10ul_Azm_Preg2_30dec18_RD2_01_503.03283.03283.3	26/92	KCINDPNAMFLTGDTAQSIMKGVAFR	F1MVI7	2616.2
0.999999	1	10ul_Azm_Preg2_30dec18_RD2_01_503.03295.03295.3	23/92	VAVMGHSFGGATAILALAKEMQFRCA	P79106	2581.26
0.999999	1	10ul_Azm_Preg2_30dec18_RD2_01_503.03351.03351.3	13/92	WLNKDTSKPVQMMKQTNSFKFVSLED	G5E537	2799.43
0.999999	1	10ul_Azm_Preg2_30dec18_RD2_01_503.03375.03375.3	13/60	SMAQPGEVMLKMKVEGMT	G3X6T7	1809.85
0.999999	1	10ul_Azm_Preg2_30dec18_RD2_01_503.03394.03394.3	20/100	DQVVEKIEDLLQSEENKNLDLEPCTGFQ	P69341	3046.48
0.999999	1	10ul_Azm_Preg2_30dec18_RD2_01_503.03406.03406.3	14/88	DKLAAFPEDRSQPSRDRRFRVTPLP	A4FV85	2741.48
0.999999	1	10ul_Azm_Preg2_30dec18_RD2_01_503.03467.03467.3	22/76	LENYINRTVAVITSDGRMIVGT	Q3ZCE0	2207.14
0.999999	1	10ul_Azm_Preg2_30dec18_RD2_01_503.03539.03539.3	16/80	SFGRFDSSIIRIKNPEDGELFDQ	E1BF46	2454.22
0.999999	1	10ul_Azm_Preg2_30dec18_RD2_01_503.03614.03614.3	14/92	VYLGHAVHMVRVQEKRKLLREAERAK	Q0VCR2	2888.6
0.999999	1	10ul_Azm_Preg2_30dec18_RD2_01_503.03653.03653.3	15/124	GGGSIRHTPSGSSTPFSTRPPLPPTPSRALDDKP	F6QPK8	3315.7
0.999999	1	10ul_Azm_Preg2_30dec18_RD2_01_503.03688.03688.3	23/88	PPPLPPAPPPPAPPRSAPGGPAGSP	E1BJS7	2081.11
0.999999	1	10ul_Azm_Preg2_30dec18_RD2_01_503.03718.03718.3	20/136	VRANPSPVRRASGGRDVAGSAAAAAPPAAKEAPMSVR	E1BE31	3342.73
0.999999	1	10ul_Azm_Preg2_30dec18_RD2_01_503.03772.03772.3	15/60	KNTFWDVDGSMVPPEWHR	O97725	1931.81
0.999999	1	10ul_Azm_Preg2_30dec18_RD2_01_503.03818.03818.3	24/136	LVKGGSSVVIGGSSIILGSEQGPAVGSGSVSGSSSSS	A6QNX5	3076.55
0.999999	1	10ul_Azm_Preg2_30dec18_RD2_01_503.03822.03822.3	17/124	FEGMLGLKGRPGLPGIKGEAGFFGIPGLKGLAGE	F1N7Q7	3109.71
0.999999	1	10ul_Azm_Preg2_30dec18_RD2_01_503.03827.03827.3	1940-11-01	LESQRDFLNALQS	F1MWU7	1319.65
0.999999	1	10ul_Azm_Preg2_30dec18_RD2_01_503.03866.03866.3	21/76	AGATGPKGLSGIPGAPGAPGFP	L8HMU8	1707.89
0.999999	1	10ul_Azm_Preg2_30dec18_RD2_01_503.03882.03882.3	16/56	LMGLEGEQVHQSGSGWS	Q24K00	1600.69
0.999999	1	10ul_Azm_Preg2_30dec18_RD2_01_503.03900.03900.3	19/92	GKMYSEGSDIVPQSNETALHYFKKAA	F1MGJ5	2758.33
0.999999	1	10ul_Azm_Preg2_30dec18_RD2_01_503.03918.03918.3	16/68	YRKGGPVTVTDANLVLGRLL	Q75WB5	1865.08
0.999999	1	10ul_Azm_Preg2_30dec18_RD2_01_503.03957.03957.3	24/104	YVKHMKILHPLAPKMMDGGALGSLGQQLV	L8IST4	2869.55
0.999999	1	10ul_Azm_Preg2_30dec18_RD2_01_503.03982.03982.3	17/68	KPVGDFVRANMAVYYASYAV	Q6QRN7	2008.94
0.999999	1	10ul_Azm_Preg2_30dec18_RD2_01_503.04019.04019.3	20/108	SRVNTFLGAKVTSGLLGSHASAITAYTLLL	F1MVK1	2860.58
0.999999	1	10ul_Azm_Preg2_30dec18_RD2_01_503.04052.04052.3	22/96	DIFPPGYNSKALEPQLSGKMLVLDYIL	A1L4Z4	2792.48
0.999999	1	10ul_Azm_Preg2_30dec18_RD2_01_503.04070.04070.3	15/44	FRVSNHDRSSRRGV	A4FUX1	1425.73
0.999999	1	10ul_Azm_Preg2_30dec18_RD2_01_503.04093.04093.3	22/88	LSRILQSPQGYALLIGVGGSGKQSL	F1N724	2315.26
0.999999	1	10ul_Azm_Preg2_30dec18_RD2_01_503.04113.04113.3	26/68	RSGSIIDQTRVLNLGPITRK	P48733	1939.09
0.999999	1	10ul_Azm_Preg2_30dec18_RD2_01_503.04142.04142.3	21/60	GEAKHWEPFRKVVSGRIV	E1BE21	1938.06
0.999999	1	10ul_Azm_Preg2_30dec18_RD2_01_503.04158.04158.3	23/112	QSPSMMHTQSPGNLHAASSPSGALRAPSPAS	L8IWG0	2843.34
0.999999	1	10ul_Azm_Preg2_30dec18_RD2_01_503.04172.04172.3	17/56	DLDMARKDLLKSKDMNR	E1B9F5	1776.92
0.999999	1	10ul_Azm_Preg2_30dec18_RD2_01_503.04178.04178.3	19/100	VYVPLIISCYVVGVLHATLHTGATFTLS	F1N5Q9	2844.52
0.999999	1	10ul_Azm_Preg2_30dec18_RD2_01_503.04184.04184.3	20/88	GCAIQIGFFVSLVGSEGLLLGLMAY	G3N3N9	2410.26
0.999999	1	10ul_Azm_Preg2_30dec18_RD2_01_503.04283.04283.3	1948-12-01	LASGEARAVSGAWSG	G3MXZ8	1247.59
0.999999	1	10ul_Azm_Preg2_30dec18_RD2_01_503.04348.04348.3	17/56	DWTAGGEAGFAGAVYGG	F1MBL6	1412.64
0.999999	1	10ul_Azm_Preg2_30dec18_RD2_01_503.04380.04380.3	19/92	DSRIRDAANDSASTAPRSTEESLSED	A5PKL1	2549.2
0.999999	1	10ul_Azm_Preg2_30dec18_RD2_01_503.04383.04383.3	17/52	HLDISDHGQLRSDLAF	L8IKP1	1538.77
0.999999	1	10ul_Azm_Preg2_30dec18_RD2_01_503.04395.04395.3	22/108	VSNQLYACYAIGKDVQAMKAVVGEEALTSE	P31407	3015.47
0.999999	1	10ul_Azm_Preg2_30dec18_RD2_01_503.04425.04425.3	23/128	RILEATTTLATTPHAYSSDPQCQNYCNTSDTRIHM	G5E6L9	3765.7
0.999999	1	10ul_Azm_Preg2_30dec18_RD2_01_503.04497.04497.3	17/52	RLRSSFDALKGLNDSL	E1BJX9	1521.78
0.999999	1	10ul_Azm_Preg2_30dec18_RD2_01_503.04510.04510.3	15/52	GLRAAHDALRSDSPPL	G3N104	1504.77
0.999999	1	10ul_Azm_Preg2_30dec18_RD2_01_503.04528.04528.3	1940-12-01	LPSEEEHCSMVEV	E1BIP3	1332.5
0.999999	1	10ul_Azm_Preg2_30dec18_RD2_01_503.04628.04628.3	20/80	DDLHSLDSRRIQGCARRLLCDAY	Q1RMU2	2511.25
0.999999	1	10ul_Azm_Preg2_30dec18_RD2_01_503.04738.04738.3	12/120	RGQNHKLYIHEKCHQARYEPQSQKGVQPAAVME	G5E6A7	3647.78
0.999999	1	10ul_Azm_Preg2_30dec18_RD2_01_503.04771.04771.3	16/52	FDISEKTINGMENKSL	E1BCK1	1564.74
0.999999	1	10ul_Azm_Preg2_30dec18_RD2_01_503.04832.04832.3	20/112	RPSPISATPPALVPETREYRSQSPVRSMDEA	L8HXA8	3196.58
0.999999	1	10ul_Azm_Preg2_30dec18_RD2_01_503.04866.04866.3	14/56	VLSSGVPQAMVLWLPDE	F1MCP4	1611.83
0.999999	1	10ul_Azm_Preg2_30dec18_RD2_01_503.04972.04972.3	14/52	LISFTFPYGMVILALV	F1MGH9	1570.85
0.999999	1	10ul_Azm_Preg2_30dec18_RD2_01_503.05115.05115.3	14/48	PVVPAPSKPGSEEWV	F1MUD3	1381.69
0.999999	1	10ul_Azm_Preg2_30dec18_RD2_01_503.05221.05221.3	17/52	LKESQTQDNITVRWDL	L8IEC3	1718.82
0.999999	1	10ul_Azm_Preg2_30dec18_RD2_01_503.05266.05266.3	25/84	RGPIGSIGPKGIPGEDGYRGYPGD	E1BB91	2143.07
0.999999	1	10ul_Azm_Preg2_30dec18_RD2_01_503.05290.05290.3	19/84	SWGRLGVRLGEGSGGPGLSLCPPG	A6QNX5	2221.14
0.999999	1	10ul_Azm_Preg2_30dec18_RD2_01_503.05392.05392.3	15/76	LLEPVAQQISHLVIMHEEGEVD	Q0VCE6	2257.14
0.999999	1	10ul_Azm_Preg2_30dec18_RD2_01_503.05403.05403.3	1952-10-01	REAAEALVGLKDSSQA	Q32LE6	1416.71
0.999999	1	10ul_Azm_Preg2_30dec18_RD2_01_503.05524.05524.3	20/84	RNVQRPLLQAPFLPPKPPPPLIVV	F1MZJ4	2430.45
0.999999	1	10ul_Azm_Preg2_30dec18_RD2_01_503.05656.05656.3	16/72	LEDVPFTEKDFENGPQNIYNL	Q3ZC23	2255
0.999999	1	10ul_Azm_Preg2_30dec18_RD2_01_503.05769.05769.3	13/64	TLDDLIAAVSSRVPTGSNS	G3MZJ0	1713.89
0.999999	1	10ul_Azm_Preg2_30dec18_RD2_01_503.05773.05773.3	13/52	PTHLRKTADDIAKVFP	L8IK38	1613.89
0.999999	1	10ul_Azm_Preg2_30dec18_RD2_01_503.05780.05780.3	15/68	AEMSSAGTLATGSYTEAAVQ	P31754	1744.78
0.999999	1	10ul_Azm_Preg2_30dec18_RD2_01_503.05896.05896.3	14/64	LHSFNTDPDVFIFLVSTRA	L8HVP9	1993.99
0.999999	1	10ul_Azm_Preg2_30dec18_RD2_01_503.06616.06616.3	1964-11-01	TVKSLEEALKEAAPEGYDC	Q3SZJ4	1847.92
0.999999	1	10ul_Azm_Preg2_30dec18_RD2_01_503.06808.06808.3	17/76	LQEPPQDCSGGPVRRCALCNCG	E1B9N8	2359.99
0.999999	1	10ul_Azm_Preg2_30dec18_RD2_01_503.06963.06963.3	16/64	TAQHMTGPSVAALSTGRWL	E1BLE4	1768.87
0.999999	1	10ul_Azm_Preg2_30dec18_RD2_01_503.06972.06972.3	13/60	REVALIQIFMVDFGNSEV	E1BFJ4	1810.88
0.999999	1	10ul_Azm_Preg2_30dec18_RD2_01_503.07023.07023.3	1948-12-01	PLADGSSNPSLHETL	Q9BDH1	1326.61
0.999999	1	10ul_Azm_Preg2_30dec18_RD2_01_503.07072.07072.3	13/44	KEFAEYVTNHYRML	F1MBI8	1574.68
0.999999	1	10ul_Azm_Preg2_30dec18_RD2_01_503.07121.07121.3	17/72	EIGMYALLGVFCLAILVFLIN	L8I1E6	2125.21
0.999999	1	10ul_Azm_Preg2_30dec18_RD2_01_503.07328.07328.3	1968-12-01	NVISVRLFKRKVGGLGFLVK	E1BKI3	1987.25
0.999999	1	10ul_Azm_Preg2_30dec18_RD2_01_503.07429.07429.3	13/92	NASASVGGPLPPPPTGPAAALPPGSA	F1N3U6	2065.08
0.999999	1	10ul_Azm_Preg2_30dec18_RD2_01_503.07499.07499.3	1960-09-01	LVTVPEMSDMGTSVLQVT	Q08DJ5	1723.8
0.999999	1	10ul_Azm_Preg2_30dec18_RD2_01_503.07704.07704.3	1964-11-01	VVCPGTMLTNLTYGILPPF	A4FUD2	1861.93
0.999999	1	10ul_Azm_Preg2_30dec18_RD2_01_503.08146.08146.3	1964-12-01	GSFGRGGSLGLGGGGGMGP	L8IND9	1438.66
0.999999	1	10ul_Azm_Preg2_30dec18_RD2_01_503.08442.08442.3	1948-07-01	PPSAPVPTGPGQPTA	E1BNH0	1204.61
0.999999	1	10ul_Azm_Preg2_30dec18_RD2_01_503.08526.08526.3	1948-11-01	DSRPNSPAQGTLTLL	E1BKF4	1340.7
0.999999	1	10ul_Azm_Preg2_30dec18_RD2_01_503.09371.09371.3	1960-12-01	TTTTLRKKHADSVAELGE	F1MZX6	1725.94
0.999999	1	10ul_Azm_Preg2_30dec18_RD2_01_503.09656.09656.3	15/52	YSTVDDDHFKSTDAE-	Q2KI86	1565.65
0.999999	1	10ul_Azm_Preg2_30dec18_RD2_01_503.09875.09875.3	18/64	SDAKAPGHSLQRTSRDWHQ	Q1RMP5	1960.96
0.999999	1	10ul_Azm_Preg2_30dec18_RD2_01_503.09878.09878.3	17/76	SAKGSCGDLPGLRAAVPPHEPG	L8I8C2	2028.02
0.999999	1	10ul_Azm_Preg2_30dec18_RD2_01_503.10286.10286.3	1944-10-01	DEMFHRREDCVQRY	F1MFB2	1677.75
0.999999	1	10ul_Azm_Preg2_30dec18_RD2_01_503.10708.10708.3	16/56	LLLGLFCTNVAFPPDAL	Q2KI18	1633.82
0.999999	1	10ul_Azm_Preg2_30dec18_RD2_01_503.10815.10815.3	1936-10-01	LYCNPGDVCYYA	Q7SIB3	1309.47
0.999999	1	10ul_Azm_Preg2_30dec18_RD2_01_503.11045.11045.3	1964-12-01	DPKLQDGQLFNHLAETLSS	F1MTS8	1909.99
0.999999	1	10ul_Azm_Preg2_30dec18_RD2_01_503.11055.11055.3	1968-10-01	LALLLAGLLLQGTLAKSIGT	Q0P5K6	1751.09
0.999999	1	10ul_Azm_Preg2_30dec18_RD2_01_503.11115.11115.3	14/64	DTVRVIAEKDKHALLDVTP	F1MEC0	1907.08
0.999999	1	10ul_Azm_Preg2_30dec18_RD2_01_503.11329.11329.3	1948-11-01	EGRTKYLLTGEGAGT	L8IM20	1321.7
0.999999	1	10ul_Azm_Preg2_30dec18_RD2_01_503.11453.11453.3	16/72	DEKSMDEIMLDTFSYSVGVIF	F1MYG7	2163.01
0.999999	1	10ul_Azm_Preg2_30dec18_RD2_01_503.11484.11484.3	1956-11-01	QQQQQPAARPGRTAPSG	F1N1E0	1591.82
0.999999	1	10ul_Azm_Preg2_30dec18_RD2_01_503.11562.11562.3	17/80	SPEDASQWFSVLSQVHASTDQEL	P79114	2360.06
0.999999	1	10ul_Azm_Preg2_30dec18_RD2_01_503.11640.11640.3	1948-10-01	LASTAPLPMAAPFLE	Q9TS99	1285.67
0.999999	1	10ul_Azm_Preg2_30dec18_RD2_01_503.11688.11688.3	14/84	TNSMAGSVAESYDTESGFEDAETC	G5E5Q8	2295.9
0.999999	1	10ul_Azm_Preg2_30dec18_RD2_01_503.11721.11721.3	13/52	ASYTLGVFICLSCSGL	L8HRQ7	1562.71
0.999999	1	10ul_Azm_Preg2_30dec18_RD2_01_503.11796.11796.3	14/44	RRKQNIEKMNEEME	A5D7J9	1564.73
0.999999	1	10ul_Azm_Preg2_30dec18_RD2_01_503.12034.12034.3	14/52	RKLVTVRAGCPIRLFA	F1N757	1628.95
0.999999	1	10ul_Azm_Preg2_30dec18_RD2_01_503.12265.12265.3	1960-11-01	LAVDWVYGSTAAYFSAVE	Q5E9H0	1705.8
0.999999	1	10ul_Azm_Preg2_30dec18_RD2_01_503.12268.12268.3	19/72	GLPGLPGANGMKGEKGDSGLP	G3MYG7	1812.9
0.999999	1	10ul_Azm_Preg2_30dec18_RD2_01_503.12311.12311.3	16/56	SFVPVVDGDFLSDTPEA	P23795	1635.77
0.999999	1	10ul_Azm_Preg2_30dec18_RD2_01_503.12363.12363.3	16/64	MTLPAQKCALDAFRTNRDS	L8HRQ1	1975.99
0.999999	1	10ul_Azm_Preg2_30dec18_RD2_01_503.12463.12463.3	13/60	QRHMLTHSGDKPFKCVVG	A4FV57	1910.96
0.999999	1	10ul_Azm_Preg2_30dec18_RD2_01_503.12496.12496.3	17/76	GAGPLLVHCSAGVGRSGTFVAL	G3N084	1955
0.999999	1	10ul_Azm_Preg2_30dec18_RD2_01_503.12681.12681.3	19/64	LDCGWIVADCTAEALKSIL	P84466	1907.88
0.999999	1	10ul_Azm_Preg2_30dec18_RD2_01_503.12686.12686.3	16/60	QGNKLRNAMVISAMKSSP	F1MPW9	1705.9
0.999999	1	10ul_Azm_Preg2_30dec18_RD2_01_503.12729.12729.3	18/60	ASSRTATVHLQALPAAPF	L8I4B4	1618.88
0.999999	1	10ul_Azm_Preg2_30dec18_RD2_01_503.12741.12741.3	15/68	PPGPGVLGPATCGQAGDLWG	E1BDN6	1751.83
0.999999	1	10ul_Azm_Preg2_30dec18_RD2_01_503.12755.12755.3	14/56	GQTPKSTTCSSQALPLN	L8HLK5	1617.8
0.999999	1	10ul_Azm_Preg3_30dec18_RD4_01_509.00455.00455.3	15/40	PNCSPQLCSLRGV	L8J2D0	1290.58
0.999999	1	10ul_Azm_Preg3_30dec18_RD4_01_509.02479.02479.3	24/64	KGERGAKGDPGAPGVGLRG	E1BG60	1592.84
0.999999	1	10ul_Azm_Preg3_30dec18_RD4_01_509.02503.02503.3	21/56	LTAVTALPPLLTFSNFC	G3X787	1590.87
0.999999	1	10ul_Azm_Preg3_30dec18_RD4_01_509.02797.02797.3	23/80	SWHSPDDSDGELASDLNRNSYAV	L8HY97	2347.99
0.999999	1	10ul_Azm_Preg3_30dec18_RD4_01_509.02840.02840.3	23/76	TIVVILMAANVEAKIYERCDLA	Q32PD6	2335.23
0.999999	1	10ul_Azm_Preg3_30dec18_RD4_01_509.02875.02875.3	20/84	TAGLSFHIASLDESGLLNVWVVVE	F1N601	2325.24
0.999999	1	10ul_Azm_Preg3_30dec18_RD4_01_509.02883.02883.3	21/80	KQNQMRPIDDPGVPSEWTSPASA	L8IRK0	2327.05
0.999999	1	10ul_Azm_Preg3_30dec18_RD4_01_509.02900.02900.3	21/68	VAAGEQSPVPARSAGTAVGA	E1B812	1624.82
0.999999	1	10ul_Azm_Preg3_30dec18_RD4_01_509.02957.02957.3	26/92	SAPAASESRPLPRVHRARGAPRQQGP	L8I0K9	2564.39
0.999999	1	10ul_Azm_Preg3_30dec18_RD4_01_509.02968.02968.3	19/92	FAQSLYHFSVPEDVVLGTAIGRVKAN	F1MGG7	2556.37
0.999999	1	10ul_Azm_Preg3_30dec18_RD4_01_509.03185.03185.3	15/44	AAPCSHPQSLTSLP	F1MLY9	1296.61
0.999999	1	10ul_Azm_Preg3_30dec18_RD4_01_509.03305.03305.3	21/68	NSSNGNSGSNSSKTVKENDK	F1N153	1810.79
0.999999	1	10ul_Azm_Preg3_30dec18_RD4_01_509.03399.03399.3	20/64	DATVEAALAGEQSPASGTQ	E1BGQ4	1558.75
0.999999	1	10ul_Azm_Preg3_30dec18_RD4_01_509.03400.03400.3	14/48	VLSTLTINNVMEADF	L8HQ47	1435.69
0.999999	1	10ul_Azm_Preg3_30dec18_RD4_01_509.03452.03452.3	17/48	APRDLAVPDGYTNRT	F1MMS9	1472.74
0.999999	1	10ul_Azm_Preg3_30dec18_RD4_01_509.03474.03474.3	21/60	DATALDVSHNLLQALDIG	E1BC86	1692.9
0.999999	1	10ul_Azm_Preg3_30dec18_RD4_01_509.03490.03490.3	21/60	ETLRAAVAASGLNTLLEG	P55906	1598.9
0.999999	1	10ul_Azm_Preg3_30dec18_RD4_01_509.03518.03518.3	25/68	NLGGNLAPADWQGGLGCDYN	A6QPB7	1862.83
0.999999	1	10ul_Azm_Preg3_30dec18_RD4_01_509.03536.03536.3	20/60	RYIFYQLLRATKFIHSGR	Q29S06	1956.06
0.999999	1	10ul_Azm_Preg3_30dec18_RD4_01_509.03556.03556.3	20/64	GPNCVEKCPDGLQGANSFL	F1N758	1891.82
0.999999	1	10ul_Azm_Preg3_30dec18_RD4_01_509.03558.03558.3	21/60	VIIQPHDDGSPRRGCSEL	L8IRD7	1822.84
0.999999	1	10ul_Azm_Preg3_30dec18_RD4_01_509.03575.03575.3	18/52	TPPLDNGGSPITGYWL	F1N757	1472.69
0.999999	1	10ul_Azm_Preg3_30dec18_RD4_01_509.03588.03588.3	15/48	PVIQLTSVGVSVFTL	L8I8D7	1348.76
0.999999	1	10ul_Azm_Preg3_30dec18_RD4_01_509.03627.03627.3	18/80	FGMTTPATVGGKAFLIAYGLFGC	M0QSW1	2087.08
0.999999	1	10ul_Azm_Preg3_30dec18_RD4_01_509.03637.03637.3	1944-12-01	PSPQVQAEPPLTSQ	L8HV79	1252.63
0.999999	1	10ul_Azm_Preg3_30dec18_RD4_01_509.03667.03667.3	16/52	LLLLVAVGLLVPMIYF	G3N1J6	1528.93
0.999999	1	10ul_Azm_Preg3_30dec18_RD4_01_509.03681.03681.3	22/68	LIHPNAMEKLMKRKGMPHRP	A7MBB4	2221.14
0.999999	1	10ul_Azm_Preg3_30dec18_RD4_01_509.03704.03704.3	14/40	AQYLMQAAGLGRM	O18978	1206.62
0.999999	1	10ul_Azm_Preg3_30dec18_RD4_01_509.03705.03705.3	21/72	SEVPAASTDTGRAKLFMVAVK	A4K436	1962.02
0.999999	1	10ul_Azm_Preg3_30dec18_RD4_01_509.03715.03715.3	16/44	NKAPKNVPGKVKVA	E1BCE1	1263.8
0.999999	1	10ul_Azm_Preg3_30dec18_RD4_01_509.03736.03736.3	16/56	PPAPQAAPPVPGGSPRR	E1BAA0	1397.74
0.999999	1	10ul_Azm_Preg3_30dec18_RD4_01_509.03742.03742.3	17/44	DDEVSPTSWGDSRQ	E1BFK4	1334.57
0.999999	1	10ul_Azm_Preg3_30dec18_RD4_01_509.03746.03746.3	19/44	DPNLNDARMILKKL	Q0VCA5	1427.79
0.999999	1	10ul_Azm_Preg3_30dec18_RD4_01_509.03761.03761.3	21/52	GMSLQQALFFNFLSAC	A5D7L5	1631.8
0.999999	1	10ul_Azm_Preg3_30dec18_RD4_01_509.03777.03777.3	19/60	DDPSAFGPSGSTPDLRPG	E1BGD9	1599.75
0.999999	1	10ul_Azm_Preg3_30dec18_RD4_01_509.03784.03784.3	27/84	SADESAGAYAYKPIGTSSVDVRML	Q3ZBL3	2303.07
0.999999	1	10ul_Azm_Preg3_30dec18_RD4_01_509.03794.03794.3	24/116	VTEIPSDLPRDAVELRFVLTKLRVIPKGAFSG	P35376	3366.9
0.999999	1	10ul_Azm_Preg3_30dec18_RD4_01_509.03827.03827.3	19/48	TFYEMPALSAEIVRR	E1BH27	1540.76
0.999999	1	10ul_Azm_Preg3_30dec18_RD4_01_509.03880.03880.3	22/60	KFLAVFYSVITPLLNPAL	G3MY66	1763.99
0.999999	1	10ul_Azm_Preg3_30dec18_RD4_01_509.03885.03885.3	20/64	NLLQALAPGTLAPLRKLRL	G3N181	1830.16
0.999999	1	10ul_Azm_Preg3_30dec18_RD4_01_509.03901.03901.3	17/64	HKLQGTSGPLLLTEEEKRT	L8IG47	1898.05
0.999999	1	10ul_Azm_Preg3_30dec18_RD4_01_509.03920.03920.3	19/52	EEPEKPALPAAENAQE	G5E6T0	1463.73
0.999999	1	10ul_Azm_Preg3_30dec18_RD4_01_509.03921.03921.3	16/84	NQPSINLHSQDLLQNSPNSMSGVS	E1BCL1	2381.13
0.999999	1	10ul_Azm_Preg3_30dec18_RD4_01_509.03935.03935.3	20/64	AQDCINQMAAGFGHMPLVS	A6QR03	1887.84
0.999999	1	10ul_Azm_Preg3_30dec18_RD4_01_509.03954.03954.3	27/76	SRDLKFLTGFETKAFSDAHVEA	E1B8K5	2310.16
0.999999	1	10ul_Azm_Preg3_30dec18_RD4_01_509.04018.04018.3	14/40	CCETFMYETSKMV	G5E5D5	1441.56
0.999999	1	10ul_Azm_Preg3_30dec18_RD4_01_509.04032.04032.3	20/52	TTGVLYSEADRCPICL	F1N2H2	1639.73
0.999999	1	10ul_Azm_Preg3_30dec18_RD4_01_509.04050.04050.3	24/76	VCGYGEVGKGCCAALKALGAIV	F1MWH2	2053.97
0.999999	1	10ul_Azm_Preg3_30dec18_RD4_01_509.04111.04111.3	23/68	LEALRDKALRMLGEAVRDGG	L8HVD9	2015.06
0.999999	1	10ul_Azm_Preg3_30dec18_RD4_01_509.04173.04173.3	20/92	QLHPSSSASFTQASNVSNYSGQTLQP	E1BMP4	2510.17
0.999999	1	10ul_Azm_Preg3_30dec18_RD4_01_509.04176.04176.3	23/80	DIDIELWDNKTITSGLKNYLRCL	G3X6F7	2551.31
0.999999	1	10ul_Azm_Preg3_30dec18_RD4_01_509.04193.04193.3	21/56	PVDILGQMQMAGDGCRS	Q2NL14	1681.72
0.999999	1	10ul_Azm_Preg3_30dec18_RD4_01_509.04204.04204.3	17/44	LFAITAGMFLYVAL	F1MM82	1302.67
0.999999	1	10ul_Azm_Preg3_30dec18_RD4_01_509.04221.04221.3	23/108	DSRALKKQGKGKAQEVLPTQARWQDVKELL	E1BK29	3191.79
0.999999	1	10ul_Azm_Preg3_30dec18_RD4_01_509.04313.04313.3	14/40	LTAQEWLSGMNKE	Q32LP9	1279.59
0.999999	1	10ul_Azm_Preg3_30dec18_RD4_01_509.04386.04386.3	23/84	LIRSAPAAELLENGSAGGGAAALQ	F1ML21	1995.04
0.999999	1	10ul_Azm_Preg3_30dec18_RD4_01_509.04409.04409.3	24/80	TITVSRKDSGILVRQEARISWFG	L8IJ58	2460.36
0.999999	1	10ul_Azm_Preg3_30dec18_RD4_01_509.04461.04461.3	22/72	PSGPGGPAGGGGGACSMGPLA	E1BNZ8	1558.65
0.999999	1	10ul_Azm_Preg3_30dec18_RD4_01_509.04523.04523.3	26/132	PMEIDSALSTVQTLKSELQDAKMAAVESQLKPLPGE	F1MQI1	3643.87
0.999999	1	10ul_Azm_Preg3_30dec18_RD4_01_509.04554.04554.3	17/76	AASPGPPEPEGSWLPAVGSSHL	A4FV33	1957.92
0.999999	1	10ul_Azm_Preg3_30dec18_RD4_01_509.04741.04741.3	22/72	FDDLENLNSLTKSSLDLGMML	L8ISR9	2094.98
0.999999	1	10ul_Azm_Preg3_30dec18_RD4_01_509.04871.04871.3	17/52	GGSRGSSEEGPPGLPG	E1BLB5	1325.62
0.999999	1	10ul_Azm_Preg3_30dec18_RD4_01_509.04888.04888.3	28/88	SPDGAGTGKVILASPETSSAKQLIF	E1B9Y6	2239.21
0.999999	1	10ul_Azm_Preg3_30dec18_RD4_01_509.04992.04992.3	15/60	MNLGSNSSGGAPCSPSAE	E1BAD1	1461.62
0.999999	1	10ul_Azm_Preg3_30dec18_RD4_01_509.05044.05044.3	17/52	ENNSPGAYITTVTATD	A7MB46	1408.68
0.999999	1	10ul_Azm_Preg3_30dec18_RD4_01_509.05046.05046.3	22/60	EPCDTVGIAYLGGVCSAK	L8J1J7	1638.74
0.999999	1	10ul_Azm_Preg3_30dec18_RD4_01_509.05083.05083.3	13/44	PKISMPDVDLHVKG	F1MCK2	1380.74
0.999999	1	10ul_Azm_Preg3_30dec18_RD4_01_509.05093.05093.3	17/44	KRTDPDVQFLTSES	F1MWU2	1406.67
0.999999	1	10ul_Azm_Preg3_30dec18_RD4_01_509.05097.05097.3	18/48	NPSCKAVLHGPFNPY	F1MNA1	1422.71
0.999999	1	10ul_Azm_Preg3_30dec18_RD4_01_509.05103.05103.3	14/40	HASHDLSDFQFAP	U3Q123	1236.54
0.999999	1	10ul_Azm_Preg3_30dec18_RD4_01_509.05104.05104.3	19/52	PCSTSGVTAGILKLTT	Q2KI32	1406.74
0.999999	1	10ul_Azm_Preg3_30dec18_RD4_01_509.05149.05149.3	20/64	GSSAPGQQTDVPPALPEKK	F1MJY2	1720.86
0.999999	1	10ul_Azm_Preg3_30dec18_RD4_01_509.05156.05156.3	23/76	DRNLRRITRMVLVVVAVFIVCW	P79350	2429.42
0.999999	1	10ul_Azm_Preg3_30dec18_RD4_01_509.05158.05158.3	22/76	EGDRQETLAAPGPALSDILRSV	L8IJW7	2066.08
0.999999	1	10ul_Azm_Preg3_30dec18_RD4_01_509.05187.05187.3	19/64	REQFGWVTELASQTPGSEN	Q3ZRW9	1864.85
0.999999	1	10ul_Azm_Preg3_30dec18_RD4_01_509.05208.05208.3	21/76	LPEENQASEDYRAVAYSSLSQS	A0A0F6QMJ3	2243
0.999999	1	10ul_Azm_Preg3_30dec18_RD4_01_509.05227.05227.3	13/60	FSMDKAVSVSQTVMTPML	G3N082	1726.79
0.999999	1	10ul_Azm_Preg3_30dec18_RD4_01_509.05236.05236.3	16/48	LAPLALIVVMYARIA	F1N1Y7	1444.85
0.999999	1	10ul_Azm_Preg3_30dec18_RD4_01_509.05245.05245.3	14/40	LPDSGLEIRDRMW	F1N6M9	1303.62
0.999999	1	10ul_Azm_Preg3_30dec18_RD4_01_509.05278.05278.3	25/60	NVRAGSAQAHGSGSERRG	F1N6Y9	1624.81
0.999999	1	10ul_Azm_Preg3_30dec18_RD4_01_509.05279.05279.3	19/80	GVSVATCTAILHVGGAQQARTGC	E1BHT5	2096.08
0.999999	1	10ul_Azm_Preg3_30dec18_RD4_01_509.05327.05327.3	25/76	TSSAKPGPALVKQSHPKNPNDK	E1BF37	2071.08
0.999999	1	10ul_Azm_Preg3_30dec18_RD4_01_509.05331.05331.3	22/52	GLLMLGVTLAHSSWRV	Q2KIY2	1582.87
0.999999	1	10ul_Azm_Preg3_30dec18_RD4_01_509.05356.05356.3	15/48	SASVTAAALEALLCP	L8HQM0	1288.67
0.999999	1	10ul_Azm_Preg3_30dec18_RD4_01_509.05362.05362.3	22/68	GPPGGATGPPTGGAPRGRLA	A5D7H4	1614.86
0.999999	1	10ul_Azm_Preg3_30dec18_RD4_01_509.05369.05369.3	27/84	NPGTVVFTVVAIDNDTGMNAELRY	L8IGM3	2318.16
0.999999	1	10ul_Azm_Preg3_30dec18_RD4_01_509.05414.05414.3	22/64	GFPSLQALAGPEVEAQLRN	F1MPV2	1824.97
0.999999	1	10ul_Azm_Preg3_30dec18_RD4_01_509.05488.05488.3	23/100	ALVSGTAPSQAVLWAKSPGVLAGRPFLD	Q3T063	2621.47
0.999999	1	10ul_Azm_Preg3_30dec18_RD4_01_509.05567.05567.3	21/72	PGPMEPPVSGPDVPSTSAAEA	E1BGX4	1823.82
0.999999	1	10ul_Azm_Preg3_30dec18_RD4_01_509.05573.05573.3	20/60	ASYGAQSAASSLAYGAQA	Q5EA36	1530.7
0.999999	1	10ul_Azm_Preg3_30dec18_RD4_01_509.05582.05582.3	21/80	REAIVHASHLPMSVIIVGVGNAD	L8J2P5	2113.14
0.999999	1	10ul_Azm_Preg3_30dec18_RD4_01_509.05588.05588.3	15/44	HCMYGSNCREAERE	G3N2G4	1531.6
0.999999	1	10ul_Azm_Preg3_30dec18_RD4_01_509.05719.05719.3	26/156	PGQFAMGPGAFSAMGMGHLLASVAGGGGGGGGGGPGTATGLD	E1BLY0	3374.56
0.999999	1	10ul_Azm_Preg3_30dec18_RD4_01_509.05758.05758.3	20/56	SLSSGTGAGAITMAAAQ	E1BQ25	1277.63
0.999999	1	10ul_Azm_Preg3_30dec18_RD4_01_509.05783.05783.3	20/76	SSWSDPVRVETASETVWIFLVT	L8IEB2	2320.17
0.999999	1	10ul_Azm_Preg3_30dec18_RD4_01_509.05811.05811.1	14/20	TGAFRVSSPGLEE	L8HTD7	1118.57
0.999999	1	10ul_Azm_Preg3_30dec18_RD4_01_509.05855.05855.3	22/64	LSAGRCHSAAWTAPPVPPR	L8INU5	1760.84
0.999999	1	10ul_Azm_Preg3_30dec18_RD4_01_509.05933.05933.3	16/48	KRNITPSSEKSKGPK	L8HQI5	1399.74
0.999999	1	10ul_Azm_Preg3_30dec18_RD4_01_509.05946.05946.3	19/60	VMSQGICMWLIILSYSGG	G3N0G7	1889.87
0.999999	1	10ul_Azm_Preg3_30dec18_RD4_01_509.05951.05951.3	16/44	DFRTEDGTANAGSD	P48765	1224.54
0.999999	1	10ul_Azm_Preg3_30dec18_RD4_01_509.06024.06024.3	19/64	SLLQETVDQEPKDQKRKSF	L8J3S4	2041.08
0.999999	1	10ul_Azm_Preg3_30dec18_RD4_01_509.06059.06059.3	23/52	DCPPGPGAIPTRAPQA	E1B7W0	1417.71
0.999999	1	10ul_Azm_Preg3_30dec18_RD4_01_509.06061.06061.3	23/72	CKYCVLCRSAVTDGRGRLAVY	F1MDD5	2180.13
0.999999	1	10ul_Azm_Preg3_30dec18_RD4_01_509.06087.06087.1	2016-09-01	EGDGEEAAASP	E1BC71	805.309
0.999999	1	10ul_Azm_Preg3_30dec18_RD4_01_509.06093.06093.3	13/56	GHSMILDSEVLLVDNRT	Q2T9Y5	1739.89
0.999999	1	10ul_Azm_Preg3_30dec18_RD4_01_509.06286.06286.3	20/60	GYLSDVASPPLLPSPFQP	F1MSM3	1729.89
0.999999	1	10ul_Azm_Preg3_30dec18_RD4_01_509.06292.06292.3	23/68	VQSYGPPQGSSFGNQYGSEG	E1B8T3	1888.79
0.999999	1	10ul_Azm_Preg3_30dec18_RD4_01_509.06413.06413.3	1936-11-01	SYGANFSWNKRT	Q02375	1241.59
0.999999	1	10ul_Azm_Preg3_30dec18_RD4_01_509.06496.06496.3	16/44	GRPMQVIGALIGKQ	A6QQ21	1281.76
0.999999	1	10ul_Azm_Preg3_30dec18_RD4_01_509.06544.06544.3	16/48	CCQTCNGMALEIQQV	L8I6E2	1551.65
0.999999	1	10ul_Azm_Preg3_30dec18_RD4_01_509.06621.06621.3	16/36	LQCDNCGITVHE	L8HTR3	1202.48
0.999999	1	10ul_Azm_Preg3_30dec18_RD4_01_509.06654.06654.3	17/48	DTAPASPCPSISSQN	L8IA28	1301.59
0.999999	1	10ul_Azm_Preg3_30dec18_RD4_01_509.06662.06662.3	24/60	TQSCGGAQAIATAEEEST	F1MYD1	1607.67
0.999999	1	10ul_Azm_Preg3_30dec18_RD4_01_509.06744.06744.3	21/64	ASVLKQLAVTSSTSKSLES	E1BP51	1776.98
0.999999	1	10ul_Azm_Preg3_30dec18_RD4_01_509.06763.06763.3	17/60	LSLATLMNFPNPLNAMQL	P57709	1776.85
0.999999	1	10ul_Azm_Preg3_30dec18_RD4_01_509.06786.06786.3	20/72	GILTEYGVDFSDFSSEVLECL	E1B7R0	2208.98
0.999999	1	10ul_Azm_Preg3_30dec18_RD4_01_509.06833.06833.3	26/120	AVDTVLAGVPGPRGPPGPPGPPGPHGPPGPPGV	L8ISJ4	2783.45
0.999999	1	10ul_Azm_Preg3_30dec18_RD4_01_509.06877.06877.3	19/48	SRKTTPSPGRQNSKA	L8I9Y5	1455.79
0.999999	1	10ul_Azm_Preg3_30dec18_RD4_01_509.06894.06894.3	22/52	LMSSILEHMCADVLQQ	F1MUK2	1648.73
0.999999	1	10ul_Azm_Preg3_30dec18_RD4_01_509.06944.06944.3	20/48	EFFLLGLTQNPKMQN	L8HP81	1551.81
0.999999	1	10ul_Azm_Preg3_30dec18_RD4_01_509.06974.06974.3	17/64	LRQGTLALQEAQDTMRGTR	A2VDM1	1874.93
0.999999	1	10ul_Azm_Preg3_30dec18_RD4_01_509.06989.06989.3	20/48	AHRPLRALRLASRGM	G5E6N2	1501.91
0.999999	1	10ul_Azm_Preg3_30dec18_RD4_01_509.06996.06996.3	19/68	EVSTEALHLTAVSPADNVSS	F1MI25	1809.91
0.999999	1	10ul_Azm_Preg3_30dec18_RD4_01_509.07086.07086.3	17/44	RDSKESDAHMVIQG	Q0II93	1358.61
0.999999	1	10ul_Azm_Preg3_30dec18_RD4_01_509.07094.07094.3	25/60	SSSAPASDVSAMASPMNG	L8J2E5	1553.63
0.999999	1	10ul_Azm_Preg3_30dec18_RD4_01_509.07105.07105.3	18/44	QKQQQMQNDMVLED	F1N2G5	1522.68
0.999999	1	10ul_Azm_Preg3_30dec18_RD4_01_509.07107.07107.3	20/68	GSSSEAASTGGAAPGRSESL	G3MZQ2	1607.7
0.999999	1	10ul_Azm_Preg3_30dec18_RD4_01_509.07114.07114.3	17/44	QMAELHGKLQSSEA	F1MDC1	1328.64
0.999999	1	10ul_Azm_Preg3_30dec18_RD4_01_509.07129.07129.3	22/84	SHPDCPPGPGAIPTRAPQAFTVPS	E1B7W0	2282.13
0.999999	1	10ul_Azm_Preg3_30dec18_RD4_01_509.07136.07136.3	14/44	AFTVTCHVPSVTPL	Q2T9N2	1343.65
0.999999	1	10ul_Azm_Preg3_30dec18_RD4_01_509.07142.07142.3	18/44	LNTMTSADLLNALR	L8I8G8	1278.61
0.999999	1	10ul_Azm_Preg3_30dec18_RD4_01_509.07233.07233.3	18/60	AGGYINGDAAVSEGYAAD	G3MXX8	1513.67
0.999999	1	10ul_Azm_Preg3_30dec18_RD4_01_509.07240.07240.3	15/48	FLDQPSVASVAMAGD	F1MPW9	1260.6
0.999999	1	10ul_Azm_Preg3_30dec18_RD4_01_509.07270.07270.3	1948-10-01	PHLVKGAMAATYSAL	F1MZW8	1318.67
0.999999	1	10ul_Azm_Preg3_30dec18_RD4_01_509.07275.07275.3	22/100	ELPHADGSSGPPGPPGPIGIPGAPGVPG	Q7M2W9	2297.18
0.999999	1	10ul_Azm_Preg3_30dec18_RD4_01_509.07305.07305.3	18/60	KESVAIKGKPSCPALLRY	L8HVG8	1724.96
0.999999	1	10ul_Azm_Preg3_30dec18_RD4_01_509.07383.07383.3	14/44	LHLHSLSLENNRIT	F1MNH4	1431.76
0.999999	1	10ul_Azm_Preg3_30dec18_RD4_01_509.07423.07423.3	17/40	FTKRGWAWDGKKA	Q08E50	1331.71
0.999999	1	10ul_Azm_Preg3_30dec18_RD4_01_509.07439.07439.3	16/48	DADDMERFMEEMREL	Q3ZBJ9	1735.65
0.999999	1	10ul_Azm_Preg3_30dec18_RD4_01_509.07449.07449.3	14/56	TAAKIKGLASGDRASRP	A6QQ70	1499.85
0.999999	1	10ul_Azm_Preg3_30dec18_RD4_01_509.07481.07481.3	14/48	TAEIVVGEGNVQTLL	E1B7Y3	1327.7
0.999999	1	10ul_Azm_Preg3_30dec18_RD4_01_509.07601.07601.3	16/40	PPKFDKIEDMAMM	Q9BE40	1339.62
0.999999	1	10ul_Azm_Preg3_30dec18_RD4_01_509.07655.07655.3	19/68	DGYRPGEEVKQADVVLLGYP	G5E5S9	1992.03
0.999999	1	10ul_Azm_Preg3_30dec18_RD4_01_509.07742.07742.3	18/56	SRSGSADSASSQAASSL	E1BNK5	1367.59
0.999999	1	10ul_Azm_Preg3_30dec18_RD4_01_509.07797.07797.3	17/48	ASASLLLPGEDSTDV	E1BKW5	1303.61
0.999999	1	10ul_Azm_Preg3_30dec18_RD4_01_509.07892.07892.3	20/72	PSPKSLPSYLNGVMPPTQSFA	A0JN98	2065.02
0.999999	1	10ul_Azm_Preg3_30dec18_RD4_01_509.07896.07896.3	13/36	LEAMRQSPLYDR	F1N283	1208.55
0.999999	1	10ul_Azm_Preg3_30dec18_RD4_01_509.07901.07901.3	13/56	TTTTATVPTATTSTATL	F2FB42	1423.7
0.999999	1	10ul_Azm_Preg3_30dec18_RD4_01_509.07903.07903.3	19/84	EETTSSSPPDSESAPSSLSAAGTP	G3MW04	2064.9
0.999999	1	10ul_Azm_Preg3_30dec18_RD4_01_509.07929.07929.3	19/68	DKRPENAVDIIENISQDVKM	L8IKC3	2067.1
0.999999	1	10ul_Azm_Preg3_30dec18_RD4_01_509.07935.07935.3	13/40	AMPKKDARTLLAR	A6QLI8	1242.71
0.999999	1	10ul_Azm_Preg3_30dec18_RD4_01_509.07961.07961.3	18/56	PTATASTATAATATTAT	F2FB42	1309.64
0.999999	1	10ul_Azm_Preg3_30dec18_RD4_01_509.08031.08031.3	20/68	GGGEEWGGNGVGDDLFSYGF	E1BHV1	1814.74
0.999999	1	10ul_Azm_Preg3_30dec18_RD4_01_509.08103.08103.3	1948-12-01	LGELQRGASTPSEKL	L8HRV9	1358.68
0.999999	1	10ul_Azm_Preg3_30dec18_RD4_01_509.08132.08132.3	14/52	GSHASADSAEGPAEEK	F1MTF0	1356.54
0.999999	1	10ul_Azm_Preg3_30dec18_RD4_01_509.08213.08213.3	14/52	TMPRPSTPLDGVTTAN	E1BAB6	1441.72
0.999999	1	10ul_Azm_Preg3_30dec18_RD4_01_509.08250.08250.3	16/56	PIKPCKSVCQRARDDCE	Q17QP5	1891.88
0.999999	1	10ul_Azm_Preg3_30dec18_RD4_01_509.08314.08314.3	20/88	NADASESGFLNSLSSDDTSSLSSNL	L8IW55	2289.97
0.999999	1	10ul_Azm_Preg3_30dec18_RD4_01_509.08317.08317.3	17/84	LRQQILFYQRVGQQLEKTLRMYDS	E1BHK6	2828.48
0.999999	1	10ul_Azm_Preg3_30dec18_RD4_01_509.08391.08391.3	22/76	DMRVKRLLKAGVTSALVCMVKA	F1MFZ5	2291.3
0.999999	1	10ul_Azm_Preg3_30dec18_RD4_01_509.08447.08447.3	21/68	LYRQFKQELKAKYPDSPRHC	Q5EA01	2290.2
0.999999	1	10ul_Azm_Preg3_30dec18_RD4_01_509.08474.08474.3	14/48	EDLRSWAAGEMEAQL	Q3YJF5	1462.65
0.999999	1	10ul_Azm_Preg3_30dec18_RD4_01_509.08527.08527.3	1940-11-01	SELDLEKGSEMRK	F1MBT5	1305.62
0.999999	1	10ul_Azm_Preg3_30dec18_RD4_01_509.08623.08623.3	15/68	GEVPPGTDSAEARELASTCL	G3MWT9	1888.85
0.999999	1	10ul_Azm_Preg3_30dec18_RD4_01_509.08700.08700.3	13/44	ACVATLAVHPVDVL	Q29RM1	1279.66
0.999999	1	10ul_Azm_Preg3_30dec18_RD4_01_509.08783.08783.3	16/72	PAEVAGSDRFSLGTSLSRSTL	F1MRT7	1939.96
0.999999	1	10ul_Azm_Preg3_30dec18_RD4_01_509.08799.08799.3	13/40	KLENNPVENATTV	E1BF75	1200.56
0.999999	1	10ul_Azm_Preg3_30dec18_RD4_01_509.09046.09046.3	17/72	NHMKHHLELEKQSSESWENHT	F1MNG4	2401.09
0.999999	1	10ul_Azm_Preg3_30dec18_RD4_01_509.09056.09056.3	13/60	VVCRQLGCGAAIGFPGGA	P30205	1618.77
0.999999	1	10ul_Azm_Preg3_30dec18_RD4_01_509.09090.09090.3	1944-09-01	GLGFPMAVGPRPPN	F1MC31	1237.66
0.999999	1	10ul_Azm_Preg3_30dec18_RD4_01_509.09139.09139.3	1940-11-01	TTGNMFDVSEVNN	E1B9G2	1211.51
0.999999	1	10ul_Azm_Preg3_30dec18_RD4_01_509.09209.09209.3	19/68	SVPAIQRIPLPGAEMLEEEP	Q5E9S2	1991.04
0.999999	1	10ul_Azm_Preg3_30dec18_RD4_01_509.09237.09237.3	20/68	QQQLSEPSAEAPRARPCRVT	F1MN90	2051.03
0.999999	1	10ul_Azm_Preg3_30dec18_RD4_01_509.09307.09307.3	19/76	SPETAEAGADHGLGPEGDGGAR	Q2KI23	1806.77
0.999999	1	10ul_Azm_Preg3_30dec18_RD4_01_509.09334.09334.3	1940-09-01	ADLIALMEKHGIG	L8J1J2	1238.67
0.999999	1	10ul_Azm_Preg3_30dec18_RD4_01_509.09525.09525.3	17/56	LENVSQLGFDKSPVEKG	O02776	1675.84
0.999999	1	10ul_Azm_Preg3_30dec18_RD4_01_509.09558.09558.3	16/56	RRPESSLGRGSGAPAAP	E1BN28	1411.72
0.999999	1	10ul_Azm_Preg3_30dec18_RD4_01_509.09614.09614.3	16/52	PPSAASDEPLPEPLET	E1BC33	1450.68
0.999999	1	10ul_Azm_Preg3_30dec18_RD4_01_509.09680.09680.3	21/84	MGPAPARAEHRGTAGEPEVMESAL	A5PJU0	2235.03
0.999999	1	10ul_Azm_Preg3_30dec18_RD4_01_509.09685.09685.3	20/64	RYMDDLKKICFYRELNSKT	A5PKH8	2238.08
0.999999	1	10ul_Azm_Preg3_30dec18_RD4_01_509.09751.09751.3	18/68	AKTCTLRISPDKLNFILSDR	L8IVH7	2120.13
0.999999	1	10ul_Azm_Preg3_30dec18_RD4_01_509.09980.09980.3	19/84	RQPLSMLVMLGLALGFSLVQDIIA	L8IV54	2357.31
0.999999	1	10ul_Azm_Preg3_30dec18_RD4_01_509.10002.10002.3	18/64	VGIFWFNTREISFDACIGQ	L8HN47	2031.95
0.999999	1	10ul_Azm_Preg3_30dec18_RD4_01_509.10026.10026.3	20/72	DSGCVLGMRKRALVFQPVTEL	Q0IIG5	2163.13
0.999999	1	10ul_Azm_Preg3_30dec18_RD4_01_509.10043.10043.3	18/64	TLQSGAYGVYEIGGLFPVW	L8I124	1768.9
0.999999	1	10ul_Azm_Preg3_30dec18_RD4_01_509.10063.10063.3	18/56	NKFSRLVTYVPVTTFKN	G3N0P1	1785.02
0.999999	1	10ul_Azm_Preg3_30dec18_RD4_01_509.10170.10170.3	23/80	SMGGLLLLALITALLYKCGFFKR	A6QQ97	2357.33
0.999999	1	10ul_Azm_Preg3_30dec18_RD4_01_509.10188.10188.3	15/56	SGMKTVEDVGSPLKYEF	F1MMS9	1651.81
0.999999	1	10ul_Azm_Preg3_30dec18_RD4_01_509.10244.10244.3	19/60	CFSNPRYFPISLSDLASV	L8IRK0	1812.9
0.999999	1	10ul_Azm_Preg3_30dec18_RD4_01_509.10249.10249.3	22/84	AVGDRGVVYISGGKAGRGDGGASS	G3N1V7	2034.02
0.999999	1	10ul_Azm_Preg3_30dec18_RD4_01_509.10253.10253.3	18/60	NRISMNGNVTACSRGCQA	O46500	1809.8
0.999999	1	10ul_Azm_Preg3_30dec18_RD4_01_509.10402.10402.3	20/64	SNTHPDPRFLHLGPFKDTA	E1BHE0	1991
0.999999	1	10ul_Azm_Preg3_30dec18_RD4_01_509.10422.10422.3	22/72	LRIISAHGCKVDNSSLTGESE	F1MR06	2029.99
0.999999	1	10ul_Azm_Preg3_30dec18_RD4_01_509.10470.10470.3	14/52	TLNQGLIHPVQCVPYL	E1BKC4	1636.84
0.999999	1	10ul_Azm_Preg3_30dec18_RD4_01_509.10474.10474.3	17/52	LRDGDGWTPLHAAAHW	L8I3D1	1502.7
0.999999	1	10ul_Azm_Preg3_30dec18_RD4_01_509.10576.10576.3	19/64	AMNEIILGANQDIRQVLHN	F1N4T1	1963.03
0.999999	1	10ul_Azm_Preg3_30dec18_RD4_01_509.10619.10619.3	15/72	FGLGGEPGGGAAGPAGPAASA	Q2KJ53	1449.68
0.999999	1	10ul_Azm_Preg3_30dec18_RD4_01_509.10662.10662.3	21/112	PMPRPPPCALPAAPSGLACPPDYSLVVRTAE	Q29RK8	3060.53
0.999999	1	10ul_Azm_Preg3_30dec18_RD4_01_509.10665.10665.3	25/104	YHIPMFAGFVIMFISTVMFAFSGTYTLLF	F1MBH3	3056.53
0.999999	1	10ul_Azm_Preg3_30dec18_RD4_01_509.10728.10728.3	20/68	SRPVADGGSDISGYILEKRD	F1N757	1932.01
0.999999	1	10ul_Azm_Preg3_30dec18_RD4_01_509.10739.10739.3	17/44	EAQKIQAEISAHEL	L8J176	1323.68
0.999999	1	10ul_Azm_Preg3_30dec18_RD4_01_509.10744.10744.3	19/76	GTQPAPGLPTRPRSGRGGRGAS	Q32KQ8	1988.08
0.999999	1	10ul_Azm_Preg3_30dec18_RD4_01_509.10785.10785.3	14/60	ASSTSSGSNSNVLVPVSW	F1MYQ7	1520.73
0.999999	1	10ul_Azm_Preg3_30dec18_RD4_01_509.10813.10813.3	15/64	KDPALLSSEAVLPDLTDEL	A7MBJ0	1783.87
0.999999	1	10ul_Azm_Preg3_30dec18_RD4_01_509.10845.10845.3	18/76	PAPRRTAPPPPGHASAGPAAMS	A2VE37	1908.97
0.999999	1	10ul_Azm_Preg3_30dec18_RD4_01_509.10926.10926.3	22/80	YGHCEGEGTRGGSGHCDCQAGYG	Q5EA46	2250.82
0.999999	1	10ul_Azm_Preg3_30dec18_RD4_01_509.11014.11014.3	1952-12-01	SAAKAVSGKATTNGFV	E1BE02	1321.7
0.999999	1	10ul_Azm_Preg3_30dec18_RD4_01_509.11030.11030.3	20/84	CIRHETIRVAVCDMMEGKCPCPEP	F1N1X8	2719.2
0.999999	1	10ul_Azm_Preg3_30dec18_RD4_01_509.11057.11057.3	19/60	LMLGLTSHEAHFSLLREE	L8IYC4	1855.93
0.999999	1	10ul_Azm_Preg3_30dec18_RD4_01_509.11106.11106.3	14/48	LRVIKYSAPVNPHLR	L8IUF2	1492.85
0.999999	1	10ul_Azm_Preg3_30dec18_RD4_01_509.11148.11148.3	20/72	HMPPQIEAPRVMMTPPPVTPQ	F1MTV4	2120.05
0.999999	1	10ul_Azm_Preg3_30dec18_RD4_01_509.11186.11186.3	21/72	DCSQEDNNVEGKSKGKEEYIA	Q28146-6	2212.99
0.999999	1	10ul_Azm_Preg3_30dec18_RD4_01_509.11213.11213.3	20/96	STADPSSLVHHTNSCLPHHPPRVASVM	F1ME81	2715.33
0.999999	1	10ul_Azm_Preg3_30dec18_RD4_01_509.11250.11250.3	15/52	MVDVAMCPGISIASVR	L8IH49	1417.69
0.999999	1	10ul_Azm_Preg3_30dec18_RD4_01_509.11271.11271.3	17/56	KAALKQLDRPERGLSER	F1MGF2	1681.91
0.999999	1	10ul_Azm_Preg3_30dec18_RD4_01_509.11350.11350.3	19/72	AGQEQRTATVWNDNNPRWMTR	B6DXC7	2319.05
0.999999	1	10ul_Azm_Preg3_30dec18_RD4_01_509.11363.11363.3	19/64	GTPGEEEPSQPSATPHSGT	F1MUI0	1706.74
0.999999	1	10ul_Azm_Preg3_30dec18_RD4_01_509.11414.11414.3	17/72	SGSSSGSSSDGSSSQSGSSDS	F1MGF2	1648.59
0.999999	1	10ul_Azm_Preg3_30dec18_RD4_01_509.11480.11480.3	18/64	LNLELQKVFQDLLYLMDWM	L8I3C5	2167.1
0.999999	1	10ul_Azm_Preg3_30dec18_RD4_01_509.11525.11525.3	13/48	FLPIGASVSLLVMFF	G3MWR0	1345.77
0.999999	1	10ul_Azm_Preg3_30dec18_RD4_01_509.11537.11537.3	1944-12-01	SNQNLEDLIPPRPP	L8IHR1	1404.74
0.999999	1	10ul_Azm_Preg3_30dec18_RD4_01_509.11548.11548.3	24/88	RLSPPGGSGSGVPGGGPLLPAAGRE	F1N104	1957.04
0.999999	1	10ul_Azm_Preg3_30dec18_RD4_01_509.11807.11807.3	16/48	LRQAAVAASTSVKPL	Q02366	1284.71
0.999999	1	10ul_Azm_Preg3_30dec18_RD4_01_509.11818.11818.3	19/52	LFLPNTDGMEMLLCYE	F6Q3P6	1702.74
0.999999	1	10ul_Azm_Preg3_30dec18_RD4_01_509.11826.11826.3	22/68	KAAEMHKMKSTAQANRMSVD	A7MB80	2005.95
0.999999	1	10ul_Azm_Preg3_30dec18_RD4_01_509.11890.11890.3	17/52	MFRPIFVAPLKSESGD	L8ITF1	1546.85
0.999999	1	10ul_Azm_Preg3_30dec18_RD4_01_509.11937.11937.3	15/64	NVPVGTRLLTISAIDLDEG	E1BJP8	1811
0.999999	1	10ul_Azm_Preg3_30dec18_RD4_01_509.11996.11996.3	20/64	TEHVSQTEVPVHLMWQTPG	F1MWK1	2032.97
0.999999	1	10ul_Azm_Preg3_30dec18_RD4_01_509.12003.12003.3	1952-11-01	VPNAWVAANPKGPKGE	F1MUT7	1405.75
0.999999	1	10ul_Azm_Preg3_30dec18_RD4_01_509.12028.12028.3	1968-12-01	SAAAPGAGCPSATSGSSATR	F1MXH6	1519.66
0.999999	1	10ul_Azm_Preg3_30dec18_RD4_01_509.12101.12101.3	15/52	PGHCCSFADPVTANLE	F1MFB2	1547.65
0.999999	1	10ul_Azm_Preg3_30dec18_RD4_01_509.12160.12160.3	18/64	AASSSDSPMTFAWKKDNEL	E1BN69	1899.83
0.999999	1	10ul_Azm_Preg3_30dec18_RD4_01_509.12182.12182.3	15/52	LMGVHSLKRAGSKQYS	A4IFN9	1576.81
0.999999	1	10ul_Azm_Preg3_30dec18_RD4_01_509.12295.12295.3	15/60	EQIPKEKLNLGGQTTEQH	F1MRN7	1782.95
0.999999	1	10ul_Azm_Preg3_30dec18_RD4_01_509.12318.12318.3	23/84	ASSPVQVPGPAPASTETRLQEAQC	Q2KIY8	2249.13
0.999999	1	10ul_Azm_Preg3_30dec18_RD4_01_509.12338.12338.3	20/64	LIIVGICLILIVIFMITKF	Q0VD51	1974.2
0.999999	1	10ul_Azm_Preg3_30dec18_RD4_01_509.12339.12339.3	16/60	LSALILACGARLLRFGAL	E1BDV5	1687.96
0.999999	1	10ul_Azm_Preg3_30dec18_RD4_01_509.12421.12421.3	16/84	GLASAASVSYIMFAITRTLTGMAL	A6QLW8	2290.17
0.999999	1	10ul_Azm_Preg3_30dec18_RD4_01_509.12559.12559.3	23/80	PGMTTSVMSQFNLLSSTMDQMSS	G3X6J7	2294.99
0.999999	1	10ul_Azm_Preg3_30dec18_RD4_01_509.12605.12605.3	20/64	WGKHYCNHNEDAGVTCSDG	P85521	1962.76
0.999999	1	10ul_Azm_Preg3_30dec18_RD4_01_509.12653.12653.3	13/36	RLWKILSDRQQH	E1BKJ5	1285.71
0.999999	1	10ul_Azm_Preg3_30dec18_RD4_01_509.12654.12654.3	17/56	LTIHFTGHSFIYGKRHE	Q28107	1799.92
0.999999	1	10ul_Azm_Preg3_30dec18_RD4_01_509.12657.12657.3	14/48	LVVEIRHHHSEQRLF	Q08D76	1638.87
0.999999	1	10ul_Azm_Preg3_30dec18_RD4_01_509.12661.12661.3	21/64	SSTSASAAAAAAAAAAAAA	E1BNQ7	1303.64
0.999999	1	10ul_Azm_Preg3_30dec18_RD4_01_509.12663.12663.3	20/60	NGTPKGPKTPTMSSCSSS	F1N3G2	1621.74
0.999999	1	10ul_Azm_Preg3_30dec18_RD4_01_509.12720.12720.3	19/76	LGLLLLLDISSKSKPEKMSRPT	G3MYE9	2211.27
0.999999	1	10ul_Azm_Preg3_30dec18_RD4_01_509.12786.12786.3	15/52	TSGAGGSVGMDTSESF	A6QLA6	1240.49
0.999999	1	10ul_Azm_Preg3_30dec18_RD4_01_509.12816.12816.3	14/52	NAKAALVEVGEGVNLR	A7E321	1368.76
0.999999	1	10ul_Azm_Preg3_30dec18_RD4_01_509.12852.12852.3	21/84	LYNTMVISQPAAGSMVQIPSSLPQ	L8IFY9	2290.13
0.999999	1	10ul_Azm_Preg3_30dec18_RD4_01_509.12916.12916.3	13/48	PADAPAPASNPSGRK	E1BEE0	1209.57
0.999999	1	10ul_Azm_Preg4_31dec18_RD5_01_512.02360.02360.3	19/72	RGRRFASGGTQSPPTFGLLLD	F1N6K5	1961.05
0.999999	1	10ul_Azm_Preg4_31dec18_RD5_01_512.02382.02382.3	19/52	RRRAKGAMGLEHIVPN	L8I696	1533.86
0.999999	1	10ul_Azm_Preg4_31dec18_RD5_01_512.02386.02386.3	19/68	DALQGRCIGSLSADSPRIQR	E1B988	1927.99
0.999999	1	10ul_Azm_Preg4_31dec18_RD5_01_512.02477.02477.3	24/88	SVSALSAVMGVTLTAAIGGADMPVV	P11024	2130.11
0.999999	1	10ul_Azm_Preg4_31dec18_RD5_01_512.02480.02480.3	25/80	ATGRQTPGATAVVAPGTGSQVEG	E1B8L8	1983
0.999999	1	10ul_Azm_Preg4_31dec18_RD5_01_512.02482.02482.3	13/44	GWTPGEDSYREWIQ	E1BMX5	1537.68
0.999999	1	10ul_Azm_Preg4_31dec18_RD5_01_512.02485.02485.3	22/64	EIPFVPMALPTKVLSAHRK	F1MJI8	1876.08
0.999999	1	10ul_Azm_Preg4_31dec18_RD5_01_512.02512.02512.3	21/72	PPSQNSSVGPGRGSEGDCSPE	L8HUT8	1873.79
0.999999	1	10ul_Azm_Preg4_31dec18_RD5_01_512.02538.02538.3	21/72	MSTQPLTAETKDMALEPKEQK	F1MUW6	2116.04
0.999999	1	10ul_Azm_Preg4_31dec18_RD5_01_512.02642.02642.3	26/68	RPAGPQMERAGNGSQGPGPL	Q1RMW2	1706.78
0.999999	1	10ul_Azm_Preg4_31dec18_RD5_01_512.02646.02646.3	21/92	DGSLRVTFASGMEISLSSEPHILAGA	G5E661	2458.25
0.999999	1	10ul_Azm_Preg4_31dec18_RD5_01_512.02685.02685.3	23/92	SAGAPLAMGMLAGAATGAALGSLMWS	F1MRK0	2204.08
0.999999	1	10ul_Azm_Preg4_31dec18_RD5_01_512.02698.02698.3	22/68	LPGGENLSKNHSDSHRWASF	Q3MHJ7	1977.9
0.999999	1	10ul_Azm_Preg4_31dec18_RD5_01_512.02709.02709.3	21/68	RALQASLPENGSQQSIFYKY	E1BI66	1980
0.999999	1	10ul_Azm_Preg4_31dec18_RD5_01_512.02713.02713.3	19/56	KEGKVGPPKLGIRKKEN	Q05FF4	1634.98
0.999999	1	10ul_Azm_Preg4_31dec18_RD5_01_512.02748.02748.3	23/64	PGVWLNTAQPLCKAFMVTD	F1MCI5	1950.97
0.999999	1	10ul_Azm_Preg4_31dec18_RD5_01_512.02757.02757.3	20/88	RGLPGPTGAVGLPGPPGPSGLVGPQ	E1B7H2	1950.06
0.999999	1	10ul_Azm_Preg4_31dec18_RD5_01_512.02777.02777.3	19/56	CAVLTWLLVVYADFVVT	L8ITB4	1706.96
0.999999	1	10ul_Azm_Preg4_31dec18_RD5_01_512.02828.02828.3	24/84	TTLSPGGMGAMGAQPAASMNGLGP	L8I687	2006.89
0.999999	1	10ul_Azm_Preg4_31dec18_RD5_01_512.02838.02838.3	25/96	AVLLYRAAGQRAVPAVLGSAGLVFLVG	F1N293	2539.5
0.999999	1	10ul_Azm_Preg4_31dec18_RD5_01_512.02870.02870.3	24/80	SYGMHSDDDANSDASSACSERSY	E1BQ15	2260.82
0.999999	1	10ul_Azm_Preg4_31dec18_RD5_01_512.02875.02875.3	22/96	QGLELAQKLADSEGLGLLNVGSGPEEP	F6Q077	2495.28
0.999999	1	10ul_Azm_Preg4_31dec18_RD5_01_512.02906.02906.3	22/108	LQQAQAFYTFPFQQMMTEAPDMAVINAQEM	A4IF83	3250.44
0.999999	1	10ul_Azm_Preg4_31dec18_RD5_01_512.02932.02932.3	20/88	VFCLKATVKQAKGILGKDVSGFSDP	E1BFF0	2468.31
0.999999	1	10ul_Azm_Preg4_31dec18_RD5_01_512.02937.02937.3	21/68	AGVRGESAGIEASGLEEPPG	E1BKA3	1753.85
0.999999	1	10ul_Azm_Preg4_31dec18_RD5_01_512.02943.02943.3	24/96	PPPPPPPPAPAPQPPPPPPPPATPAAA	E1BPM7	2349.25
0.999999	1	10ul_Azm_Preg4_31dec18_RD5_01_512.02966.02966.3	22/68	QLGLGNQTDAVPSPAQIMYN	A6QL85	1889.92
0.999999	1	10ul_Azm_Preg4_31dec18_RD5_01_512.02983.02983.3	25/80	QILLDWASQSNSQYPDPSTQPTV	Q3T0A0	2347.1
0.999999	1	10ul_Azm_Preg4_31dec18_RD5_01_512.02992.02992.3	24/72	AEKLRSVVTPARVQFKTYPGV	E1BIB8	2175.22
0.999999	1	10ul_Azm_Preg4_31dec18_RD5_01_512.02997.02997.3	19/72	NLVMYIIIIIHWNACVYFSIS	Q00194	2367.25
0.999999	1	10ul_Azm_Preg4_31dec18_RD5_01_512.03001.03001.3	19/44	RRDQKWHDKQYKKA	Q3T199	1658.86
0.999999	1	10ul_Azm_Preg4_31dec18_RD5_01_512.03051.03051.3	21/92	PTAAPAKGMVPDDAVEALAGSLPKKE	P20811	2336.24
0.999999	1	10ul_Azm_Preg4_31dec18_RD5_01_512.03069.03069.3	17/88	NFGMHLKSQEEEKPVVIHSPGFYTG	Q3ZCC3	2675.31
0.999999	1	10ul_Azm_Preg4_31dec18_RD5_01_512.03079.03079.3	27/60	KFQSEEQQQTEDELQDKL	P02666	1980.85
0.999999	1	10ul_Azm_Preg4_31dec18_RD5_01_512.03091.03091.3	25/96	GGPHLVEEGDQILTARFHCSGAESFLW	P30205	2769.32
0.999999	1	10ul_Azm_Preg4_31dec18_RD5_01_512.03112.03112.3	15/40	MDNFLLMAMAYDR	G3X890	1302.56
0.999999	1	10ul_Azm_Preg4_31dec18_RD5_01_512.03142.03142.3	25/80	KDGSNHKAESGALIEAAKSKIHQ	A4IFB6	2162.11
0.999999	1	10ul_Azm_Preg4_31dec18_RD5_01_512.03156.03156.3	19/68	KTFKVDDMLSKVEKMKGEQE	L8IHI3	2112.06
0.999999	1	10ul_Azm_Preg4_31dec18_RD5_01_512.03179.03179.3	22/88	LALNCDAPLDDKIGAESRNWRAGKP	L8HWI4	2556.25
0.999999	1	10ul_Azm_Preg4_31dec18_RD5_01_512.03191.03191.3	21/84	ALNSLLVAELPQFNQLAMRWLGQL	L8IMA4	2556.35
0.999999	1	10ul_Azm_Preg4_31dec18_RD5_01_512.03215.03215.3	22/80	PEEIWLYKNPLVQSDNIPTRLMF	L8IWL9	2558.32
0.999999	1	10ul_Azm_Preg4_31dec18_RD5_01_512.03227.03227.3	17/80	LLLLVCHCGKGAKGFTPIPGTIE	L8IAJ7	2238.2
0.999999	1	10ul_Azm_Preg4_31dec18_RD5_01_512.03243.03243.3	20/96	VQGLGHVPAGVGMSLAIPVEVKPCLNV	L8ICE8	2558.33
0.999999	1	10ul_Azm_Preg4_31dec18_RD5_01_512.03250.03250.3	26/92	RIYSSDSDEGSEEDRAQRLLKAKKLT	O18967	2737.39
0.999999	1	10ul_Azm_Preg4_31dec18_RD5_01_512.03286.03286.3	23/104	PPVAMLQIPVAPAVPAVNLVPPTFPVSMP	F1MYK6	2754.52
0.999999	1	10ul_Azm_Preg4_31dec18_RD5_01_512.03288.03288.3	23/100	YLLLIQTEPLEGVNITSPVRLIHGTVGK	A4FUY1	2768.58
0.999999	1	10ul_Azm_Preg4_31dec18_RD5_01_512.03298.03298.3	22/96	GPLKKAVRMMGAPNLIADSMEYGLSYS	E1BF57	2754.39
0.999999	1	10ul_Azm_Preg4_31dec18_RD5_01_512.03319.03319.3	20/88	VPSQEHAQEPERQYMHIGTMVEFAF	L8I048	2730.22
0.999999	1	10ul_Azm_Preg4_31dec18_RD5_01_512.03373.03373.3	20/56	HRIIPGFMCQGGDSTCH	L8I886	1697.73
0.999999	1	10ul_Azm_Preg4_31dec18_RD5_01_512.03374.03374.3	18/56	FILSQPQLGQAVIIMVG	G3MYF6	1608.93
0.999999	1	10ul_Azm_Preg4_31dec18_RD5_01_512.03387.03387.3	22/100	QAAVDGARKANSTRTWKEVCFACVDGKE	P49951	2896.41
0.999999	1	10ul_Azm_Preg4_31dec18_RD5_01_512.03391.03391.3	24/100	DLCQFDHGNDPLVVDEVALPSMIPFPPP	E1BCT9	2906.4
0.999999	1	10ul_Azm_Preg4_31dec18_RD5_01_512.03404.03404.3	21/52	LYFAHTHLTVTVTIGL	E1BBQ2	1558.81
0.999999	1	10ul_Azm_Preg4_31dec18_RD5_01_512.03409.03409.3	24/108	AGDLSEPGQICPDSTLLSHLGKNGHNFLKK	Q7YS27	3033.5
0.999999	1	10ul_Azm_Preg4_31dec18_RD5_01_512.03418.03418.3	26/80	EEEQESKAELQRALSKANTEVAQ	Q9BE41	2330.17
0.999999	1	10ul_Azm_Preg4_31dec18_RD5_01_512.03471.03471.3	24/96	WAVLAQGGAAGAGAAAGALRLLWGSLF	E1BDQ4	2221.23
0.999999	1	10ul_Azm_Preg4_31dec18_RD5_01_512.03494.03494.3	24/120	EAGAIKLELMPARPFSSSELQTDRAAGQQSTDE	L8IVB8	3274.63
0.999999	1	10ul_Azm_Preg4_31dec18_RD5_01_512.03503.03503.3	25/80	NNDGGIFDDPPALSEAGVMLPEQ	Q3SWX9	2142.98
0.999999	1	10ul_Azm_Preg4_31dec18_RD5_01_512.03506.03506.3	25/88	SVKLIPKIEFLDLSHNGVLVMNNLQ	L8IEU8	2621.46
0.999999	1	10ul_Azm_Preg4_31dec18_RD5_01_512.03507.03507.3	20/76	TAASDQPDSAATTEKAKKIKNL	A6QPH1	2073.07
0.999999	1	10ul_Azm_Preg4_31dec18_RD5_01_512.03514.03514.3	19/52	AALHAVCRVLPSATLE	A3KLR9	1506.83
0.999999	1	10ul_Azm_Preg4_31dec18_RD5_01_512.03515.03515.3	25/88	DSGSTSGGSKSQSRSRSRSDSPPRQ	F1MIJ6	2350.13
0.999999	1	10ul_Azm_Preg4_31dec18_RD5_01_512.03548.03548.3	27/116	QRSLQNTEEKSSSFPAPQTDPLGDPDQINEDK	P01272	3314.52
0.999999	1	10ul_Azm_Preg4_31dec18_RD5_01_512.03568.03568.3	24/100	NCTRGENDCRYAHPTDVSMIETSDNTVT	E1B8I9	3027.28
0.999999	1	10ul_Azm_Preg4_31dec18_RD5_01_512.03570.03570.3	21/100	GSFPGGFPGGMPGNFPGGMPGMAGGMPG	A7E3S8	2408.02
0.999999	1	10ul_Azm_Preg4_31dec18_RD5_01_512.03580.03580.3	27/84	NRREKEKDYEGKHNSLEDADQGKN	A6H6X4	2631.26
0.999999	1	10ul_Azm_Preg4_31dec18_RD5_01_512.03581.03581.3	26/92	HSVKRASVPPVPGKPRQVLPPGASHF	F1MB71	2460.41
0.999999	1	10ul_Azm_Preg4_31dec18_RD5_01_512.03638.03638.3	21/92	YFLSAASRPLCSGGHASNKEKEMVTS	E1BHV1	2592.24
0.999999	1	10ul_Azm_Preg4_31dec18_RD5_01_512.03652.03652.3	26/120	VVANAKGAMTGAKDAVTTTVTGAKDSVAATITG	Q8WNR8	2920.52
0.999999	1	10ul_Azm_Preg4_31dec18_RD5_01_512.03659.03659.3	26/84	PKPGTAGRLMKQAAEDKPKPRPGD	Q32KQ8	2332.28
0.999999	1	10ul_Azm_Preg4_31dec18_RD5_01_512.03664.03664.3	24/96	EMTNSNMTSEDFPAVSSPTQMMNKSGS	F1MFL0	2707.12
0.999999	1	10ul_Azm_Preg4_31dec18_RD5_01_512.03686.03686.3	21/68	VVAATGMAVALFSSVLALGL	Q58CR4	1676.92
0.999999	1	10ul_Azm_Preg4_31dec18_RD5_01_512.03715.03715.3	24/96	KFIDTVAEDAKRVLAKIEEMRSGRMK-	Q3ZCI2	2924.52
0.999999	1	10ul_Azm_Preg4_31dec18_RD5_01_512.03723.03723.3	22/60	NKTPPTAALSAPPPLIST	E1BPK9	1559.89
0.999999	1	10ul_Azm_Preg4_31dec18_RD5_01_512.03750.03750.3	22/84	VPAEWIHEAKAVRAHMESDKHLEA	E1BCV4	2599.26
0.999999	1	10ul_Azm_Preg4_31dec18_RD5_01_512.03765.03765.3	26/72	ELGMQGQLRLAAAAVLVVGCG	A1A4L8	1942.05
0.999999	1	10ul_Azm_Preg4_31dec18_RD5_01_512.03807.03807.3	25/88	YPILSGGDSGTCSARAYPSDHGITT	L8I3B2	2318.06
0.999999	1	10ul_Azm_Preg4_31dec18_RD5_01_512.03811.03811.3	24/96	QQRGWVFTPGVDDAESECGLDNFRTFD	Q2KIU2	2902.3
0.999999	1	10ul_Azm_Preg4_31dec18_RD5_01_512.03812.03812.3	21/56	HSGWLGGKDVLPPAVEP	A2VDL5	1523.8
0.999999	1	10ul_Azm_Preg4_31dec18_RD5_01_512.03825.03825.3	21/52	RRMRSGSYIKAMGDEE	E1BBJ2	1615.74
0.999999	1	10ul_Azm_Preg4_31dec18_RD5_01_512.03827.03827.3	19/60	LWMAGTLLAPPGGTPLER	A6QQD2	1625.81
0.999999	1	10ul_Azm_Preg4_31dec18_RD5_01_512.03829.03829.3	24/84	ESAPSQTDSDVPPETEECPSITAD	F1N1S2	2316.99
0.999999	1	10ul_Azm_Preg4_31dec18_RD5_01_512.03871.03871.3	25/100	LSTVIGLLSCLIGYCSSHWCCKKEVQET	L8I5V9	3113.44
0.999999	1	10ul_Azm_Preg4_31dec18_RD5_01_512.03883.03883.3	14/44	AIAGNPLGVDRELL	Q3SZJ0	1252.68
0.999999	1	10ul_Azm_Preg4_31dec18_RD5_01_512.03932.03932.3	23/108	RKAAEKQKKTAEKELLKKPEKGEEPSTEKP	E1BGC9	3181.76
0.999999	1	10ul_Azm_Preg4_31dec18_RD5_01_512.03964.03964.3	23/64	SQWEACRGPAESPAGTREK	Q1JPB9	1900.85
0.999999	1	10ul_Azm_Preg4_31dec18_RD5_01_512.03978.03978.3	22/108	PGSMNDTCKIVLATPQFHITIPQRSKRNAW	E1BMQ3	3198.64
0.999999	1	10ul_Azm_Preg4_31dec18_RD5_01_512.03993.03993.3	20/60	KSILKLLDTERPANRFHL	E1BIY5	1909.05
0.999999	1	10ul_Azm_Preg4_31dec18_RD5_01_512.03994.03994.3	26/160	SDFHGEMQATDASGLPASMIVPDAPQGPQAPVDPQVASASQAA	Q2KI70	4103.88
0.999999	1	10ul_Azm_Preg4_31dec18_RD5_01_512.04002.04002.3	25/132	SCARSPQREGRDTDREQLFREKRDPADSSQVMPWPQ	L8HNG9	4099.95
0.999999	1	10ul_Azm_Preg4_31dec18_RD5_01_512.04011.04011.3	26/76	AVYSAAAAVLAGVESRQGSLKG	A6QQR1	1976.07
0.999999	1	10ul_Azm_Preg4_31dec18_RD5_01_512.04023.04023.3	26/56	SSKASYELIVVAHDHGK	E1BDF9	1624.82
0.999999	1	10ul_Azm_Preg4_31dec18_RD5_01_512.04039.04039.3	25/76	RGSVEIGLGAAGDLLGKRLGRS	E1BDR5	1938.1
0.999999	1	10ul_Azm_Preg4_31dec18_RD5_01_512.04055.04055.3	24/104	LVPPIMFESHMYIFKTLASALHERGHHTV	L8IKU2	3164.57
0.999999	1	10ul_Azm_Preg4_31dec18_RD5_01_512.04060.04060.3	24/60	GAPRGGGRGGSRSDRGGG	D3JUI8	1498.75
0.999999	1	10ul_Azm_Preg4_31dec18_RD5_01_512.04076.04076.3	21/72	MSDGDVLSKNMRADDITSGYM	F1MHF3	2042.92
0.999999	1	10ul_Azm_Preg4_31dec18_RD5_01_512.04077.04077.3	20/52	TLKASEKSTMEQLVEK	F1ML65	1591.81
0.999999	1	10ul_Azm_Preg4_31dec18_RD5_01_512.04101.04101.3	18/56	GPAGSCSFASAGGSAAS	F1ME54	1296.54
0.999999	1	10ul_Azm_Preg4_31dec18_RD5_01_512.04108.04108.3	23/84	SSWSLWGANYMDCFESNETMGVWL	Q28175	2701.06
0.999999	1	10ul_Azm_Preg4_31dec18_RD5_01_512.04121.04121.3	25/84	ALLSAPNPDDPLANDVAEQWKTNE	Q0P5K3	2407.17
0.999999	1	10ul_Azm_Preg4_31dec18_RD5_01_512.04154.04154.3	24/104	DGLMKVEVSEDFLSINPLPSSPFTYPVPK	E1BBU2	2978.5
0.999999	1	10ul_Azm_Preg4_31dec18_RD5_01_512.04160.04160.3	21/52	SRRTRIRGGCRVLVTV	A6QP85	1698.99
0.999999	1	10ul_Azm_Preg4_31dec18_RD5_01_512.04165.04165.3	27/108	GASQATTEEVAAFFVADLGAVVRKHFCFLK	F1N7A5	3083.55
0.999999	1	10ul_Azm_Preg4_31dec18_RD5_01_512.04172.04172.3	23/80	RDLKPENILLDDNMQIRLSDFGF	Q2KJ16	2461.22
0.999999	1	10ul_Azm_Preg4_31dec18_RD5_01_512.04178.04178.3	22/72	PAIYRHIVYSGGRMVTYEHLR	E1BME0	2264.15
0.999999	1	10ul_Azm_Preg4_31dec18_RD5_01_512.04184.04184.3	24/64	KEGCEIGFIPSPVKLENMR	Q9MZL5	1918.92
0.999999	1	10ul_Azm_Preg4_31dec18_RD5_01_512.04189.04189.3	16/44	RRHSMQAPVRMEWS	L8I7T9	1526.72
0.999999	1	10ul_Azm_Preg4_31dec18_RD5_01_512.04194.04194.3	25/80	RVEMALADPPWDFSPPSFLETSS	L8J3H7	2335.07
0.999999	1	10ul_Azm_Preg4_31dec18_RD5_01_512.04216.04216.3	23/84	RTPPQQKSPTVARRLSITSLTGKT	L8IDK8	2365.34
0.999999	1	10ul_Azm_Preg4_31dec18_RD5_01_512.04227.04227.3	17/44	PPAKGPISKPELVG	F1MM14	1234.73
0.999999	1	10ul_Azm_Preg4_31dec18_RD5_01_512.04244.04244.3	22/60	LAVYFDYSCEGDVPGVLD	E1BP15	1789.79
0.999999	1	10ul_Azm_Preg4_31dec18_RD5_01_512.04247.04247.3	21/56	AGDDLVSPALELSTALH	A6QNS6	1499.77
0.999999	1	10ul_Azm_Preg4_31dec18_RD5_01_512.04257.04257.3	22/60	TESAGQTQGVAVTASAGV	E1BIF3	1432.68
0.999999	1	10ul_Azm_Preg4_31dec18_RD5_01_512.04266.04266.3	21/84	PMKEINLAPDSSSVVVSGLMVATK	P07589	2279.14
0.999999	1	10ul_Azm_Preg4_31dec18_RD5_01_512.04273.04273.3	20/104	DIVLMTNNHAQVGVRLINSVNHYGLLIDR	Q2TBR1	3018.61
0.999999	1	10ul_Azm_Preg4_31dec18_RD5_01_512.04287.04287.3	23/76	ARKDGGQDGAGNGSTGHSIHMP	L8HVG8	1996.88
0.999999	1	10ul_Azm_Preg4_31dec18_RD5_01_512.04295.04295.3	19/72	SAGSMNMSSYVGAGMSPSLAG	Q5DM46	1864.76
0.999999	1	10ul_Azm_Preg4_31dec18_RD5_01_512.04297.04297.3	26/64	NINRGLLCLGNVISALGDD	F1MCP5	1783.96
0.999999	1	10ul_Azm_Preg4_31dec18_RD5_01_512.04304.04304.3	21/76	VLISISLALQIAVGVLLIFLVR	Q2TA30	2094.34
0.999999	1	10ul_Azm_Preg4_31dec18_RD5_01_512.04318.04318.3	28/80	STSRAWNGSSVTMFILLGFADHP	E1BNE3	2309.13
0.999999	1	10ul_Azm_Preg4_31dec18_RD5_01_512.04322.04322.3	22/76	LHIAAQNNCPGIMNALIEAGAH	Q29RM5	2063.99
0.999999	1	10ul_Azm_Preg4_31dec18_RD5_01_512.04339.04339.3	23/144	RVHLRPLKLDESLSKDALARKLAALTPGFTGSGADISNV	E1BFQ0	3861.11
0.999999	1	10ul_Azm_Preg4_31dec18_RD5_01_512.04350.04350.3	27/88	STVILVDADGHVTFTERSMLGSDPT	Q29RZ5	2475.2
0.999999	1	10ul_Azm_Preg4_31dec18_RD5_01_512.04362.04362.3	22/84	MDLNGDGLTDVTIGGLGGAALFWS	F1MMN6	2161.07
0.999999	1	10ul_Azm_Preg4_31dec18_RD5_01_512.04418.04418.3	20/84	KVLRHCKRCRNVYYCGPECQKSDW	L8HS72	2884.31
0.999999	1	10ul_Azm_Preg4_31dec18_RD5_01_512.04419.04419.3	23/104	KGPPAAAATSAAAAAAAAAATGTPATSSS	E1BNP2	2154.06
0.999999	1	10ul_Azm_Preg4_31dec18_RD5_01_512.04452.04452.3	21/112	PGRLRPALRPYLGFLDRGSPGAAVRGAVCGL	E1BCI3	3038.65
0.999999	1	10ul_Azm_Preg4_31dec18_RD5_01_512.04459.04459.3	27/104	NSPSAPRVPGLLDQSNPLSTPMPKKRGRK	A6QP63	2901.56
0.999999	1	10ul_Azm_Preg4_31dec18_RD5_01_512.04463.04463.3	26/76	SVKKETAKGTKKAIKQKNINLK	Q17QY2	2239.37
0.999999	1	10ul_Azm_Preg4_31dec18_RD5_01_512.04478.04478.3	18/80	DLLLGDIFLVKMCTPGEALEKCL	L8IIF7	2406.24
0.999999	1	10ul_Azm_Preg4_31dec18_RD5_01_512.04485.04485.3	21/52	LSASVFSLLAIAIERY	Q5E9P3	1475.83
0.999999	1	10ul_Azm_Preg4_31dec18_RD5_01_512.04492.04492.3	21/80	CILRASTVEPAGERSKTALLITS	F1N7K2	2225.27
0.999999	1	10ul_Azm_Preg4_31dec18_RD5_01_512.04518.04518.3	22/100	LPLLSLLMLLLLGAGAPGAWGQAGSLDL	L8HUU1	2549.39
0.999999	1	10ul_Azm_Preg4_31dec18_RD5_01_512.04529.04529.3	21/64	NGSIVSMNMKDAFPRSIEM	L8IEN6	1912.9
0.999999	1	10ul_Azm_Preg4_31dec18_RD5_01_512.04594.04594.3	27/60	PMLMMPPPPAAMGPPGAP	F1MMW6	1580.72
0.999999	1	10ul_Azm_Preg4_31dec18_RD5_01_512.04595.04595.3	22/60	VSSLSSEGDYAIPPDACS	E1BF01	1667.7
0.999999	1	10ul_Azm_Preg4_31dec18_RD5_01_512.04620.04620.3	24/84	ARELEELNVPGEIVESLSSSEESL	P02666	2431.16
0.999999	1	10ul_Azm_Preg4_31dec18_RD5_01_512.04621.04621.3	26/92	-MDLPVGPGAAGPSNVPAFLTKLWTL	Q08DJ8	2454.26
0.999999	1	10ul_Azm_Preg4_31dec18_RD5_01_512.04625.04625.3	26/104	PGSPGPKGSPGFPGIPGPPGQPGPRGSMG	F1MZQ2	2469.22
0.999999	1	10ul_Azm_Preg4_31dec18_RD5_01_512.04636.04636.3	23/84	AVTKTHVMLGAETEEKLFDAPLSL	A7Z063	2431.23
0.999999	1	10ul_Azm_Preg4_31dec18_RD5_01_512.04639.04639.3	17/48	LGTSEEDGMVGTLYD	Q58DG1	1357.57
0.999999	1	10ul_Azm_Preg4_31dec18_RD5_01_512.04653.04653.3	17/72	LDLPAAAKSGDGLAEENSRDD	L8I523	1914.89
0.999999	1	10ul_Azm_Preg4_31dec18_RD5_01_512.04709.04709.3	26/96	SIPGRPDPGAQPGASLAHAASTSPLTS	E1BH25	2368.21
0.999999	1	10ul_Azm_Preg4_31dec18_RD5_01_512.04723.04723.3	28/96	ARELEELNVPGEIVESLSSSEESITRL	P02666	2801.39
0.999999	1	10ul_Azm_Preg4_31dec18_RD5_01_512.04741.04741.3	25/52	LQGHSSIAGLLLKPAN	E1BF59	1390.79
0.999999	1	10ul_Azm_Preg4_31dec18_RD5_01_512.04750.04750.3	21/76	RGSDGSSGPPGPPGSIGPKGPE	E1B7H2	1703.81
0.999999	1	10ul_Azm_Preg4_31dec18_RD5_01_512.04753.04753.3	30/148	PGGPMPGPHGGPGGPGGPVGPRLLGPPPPPRGGDPFWDGP	E1BF96	3562.73
0.999999	1	10ul_Azm_Preg4_31dec18_RD5_01_512.04786.04786.3	19/80	PHVVQENLHSEVVEVCTSSTLKT	E1BH40	2394.18
0.999999	1	10ul_Azm_Preg4_31dec18_RD5_01_512.04808.04808.3	19/56	LLTNLDKSLASGLQTTA	G3X6R4	1560.84
0.999999	1	10ul_Azm_Preg4_31dec18_RD5_01_512.04821.04821.3	24/116	VFLANHHCSKMWNVEKIHSEFGAPTIAKRLIS	F1MBX1	3533.82
0.999999	1	10ul_Azm_Preg4_31dec18_RD5_01_512.04822.04822.3	20/60	PGPGLGPNPRSSGLGPGL	P0CG10	1418.73
0.999999	1	10ul_Azm_Preg4_31dec18_RD5_01_512.04833.04833.3	16/40	VSSKPKNNEQIGA	E1BCE1	1200.61
0.999999	1	10ul_Azm_Preg4_31dec18_RD5_01_512.04860.04860.3	20/76	TLMTCEMLRKKSGMQIALNDHL	P28088	2407.15
0.999999	1	10ul_Azm_Preg4_31dec18_RD5_01_512.04869.04869.3	15/64	FLILPLTFYHVVDETSPLK	A2VDQ4	1956.06
0.999999	1	10ul_Azm_Preg4_31dec18_RD5_01_512.04872.04872.3	22/112	ASHLGTADMATFLVNSLYMMKTTLALFEFTD	F1MLE3	3252.59
0.999999	1	10ul_Azm_Preg4_31dec18_RD5_01_512.04932.04932.3	21/108	SSADNEISEMTTGPPPPPPSVSPLAPPLRR	E1BK26	2853.42
0.999999	1	10ul_Azm_Preg4_31dec18_RD5_01_512.04947.04947.3	13/40	SKYESVMKTEPGV	Q27968	1267.61
0.999999	1	10ul_Azm_Preg4_31dec18_RD5_01_512.04949.04949.3	24/104	ASLKTSSTAAQETLTSDVLFPTNEEQDPS	E1BGQ5	2908.38
0.999999	1	10ul_Azm_Preg4_31dec18_RD5_01_512.04963.04963.3	26/128	LQFITQREKPLALYVFSPNDKVIKKMIAETSSGGV	P30907	3710.97
0.999999	1	10ul_Azm_Preg4_31dec18_RD5_01_512.04977.04977.3	21/100	VLPRLVELMSSSELNILTPSLRTVGNIV	C1JZ66	2851.58
0.999999	1	10ul_Azm_Preg4_31dec18_RD5_01_512.05001.05001.3	26/120	YRNFCMAFGGHKTLTHLTLQGNDQNDMLPPLCE	L8I4J5	3585.67
0.999999	1	10ul_Azm_Preg4_31dec18_RD5_01_512.05014.05014.3	22/80	QPMQLMFEVERGSHAAFVVALGF	E1BNL3	2288.14
0.999999	1	10ul_Azm_Preg4_31dec18_RD5_01_512.05025.05025.3	23/88	SNTNMLRKGPAEDMSSKLNQARSMS	E1B7K5	2594.24
0.999999	1	10ul_Azm_Preg4_31dec18_RD5_01_512.05081.05081.3	20/76	CQEEQEVNAESKAMVLAAFVQR	L8IDR2	2236.07
0.999999	1	10ul_Azm_Preg4_31dec18_RD5_01_512.05128.05128.3	22/60	QPGGVPGAVPGGVPGGVF	P04985	1272.68
0.999999	1	10ul_Azm_Preg4_31dec18_RD5_01_512.05175.05175.3	21/52	AMGGAFSSMAAGMGPL	E1BK57	1302.5
0.999999	1	10ul_Azm_Preg4_31dec18_RD5_01_512.05264.05264.3	19/96	DSSGPATTLNQEQNADPMAGLPLAGIL	G3MY74	2468.19
0.999999	1	10ul_Azm_Preg4_31dec18_RD5_01_512.05288.05288.3	15/44	TADTLSGEMVSTSN	F1MRT7	1196.52
0.999999	1	10ul_Azm_Preg4_31dec18_RD5_01_512.05295.05295.3	22/52	PNSRSSRNQTHGAMKA	E1BI26	1588.75
0.999999	1	10ul_Azm_Preg4_31dec18_RD5_01_512.05325.05325.3	22/72	QMAQVFEGLCGVVKHGMNRSD	G3N029	2151
0.999999	1	10ul_Azm_Preg4_31dec18_RD5_01_512.05328.05328.3	22/132	LGLEGLQSGSRAQRETGLPFPTSFPTPSSIGAMSER	F1MDZ8	3507.69
0.999999	1	10ul_Azm_Preg4_31dec18_RD5_01_512.05391.05391.3	26/108	LLSLLPSMEFTQTPMAATTATVSASPEISS	Q9XS61	2880.41
0.999999	1	10ul_Azm_Preg4_31dec18_RD5_01_512.05429.05429.3	24/92	NRWKLASQVQVQREPKETAKKKAAEH	E1BMZ5	2808.57
0.999999	1	10ul_Azm_Preg4_31dec18_RD5_01_512.05463.05463.3	15/40	VVRTGQNATLKCT	E1BFQ3	1246.65
0.999999	1	10ul_Azm_Preg4_31dec18_RD5_01_512.05489.05489.3	19/80	LTVQSALPDVGSPRMAEISKSSL	E1BGB0	2159.09
0.999999	1	10ul_Azm_Preg4_31dec18_RD5_01_512.05532.05532.3	14/44	KNQETVQPRNNDLY	E1B9D8	1426.68
0.999999	1	10ul_Azm_Preg4_31dec18_RD5_01_512.05544.05544.3	21/80	RCLLDATVAGGQARLQASDRYRD	F1N6Q6	2320.17
0.999999	1	10ul_Azm_Preg4_31dec18_RD5_01_512.05546.05546.3	26/92	FYHGTKAALVGGTTMIIGHVLPDKET	A8E641	2507.32
0.999999	1	10ul_Azm_Preg4_31dec18_RD5_01_512.05586.05586.3	25/92	LQKLALEKGNLSAAACEDLASLLTST	F1MZG0	2502.3
0.999999	1	10ul_Azm_Preg4_31dec18_RD5_01_512.05612.05612.3	23/64	-MGSFNTSFREGFILMGFS	E1BH57	1971.89
0.999999	1	10ul_Azm_Preg4_31dec18_RD5_01_512.05642.05642.3	21/72	AVITDFSARISATLQDRHERL	L8INE2	2214.15
0.999999	1	10ul_Azm_Preg4_31dec18_RD5_01_512.05652.05652.3	19/56	GRPGPGPSQSPGAQGPS	G3N2D0	1388.68
0.999999	1	10ul_Azm_Preg4_31dec18_RD5_01_512.05792.05792.3	19/60	YISYLVAPGSTSGPSRLN	A7Z049	1603.86
0.999999	1	10ul_Azm_Preg4_31dec18_RD5_01_512.05839.05839.3	19/72	SPYTLGLTNVGIYKMDLPHGM	Q17QF0	2104.07
0.999999	1	10ul_Azm_Preg4_31dec18_RD5_01_512.05872.05872.3	23/84	KGDPGIPGLDRSGFPGEPGLPGMP	F1MZU6	2122.02
0.999999	1	10ul_Azm_Preg4_31dec18_RD5_01_512.05881.05881.3	19/76	FPFRTFGKGLIKKCKTSPDAFV	L8HS90	2297.24
0.999999	1	10ul_Azm_Preg4_31dec18_RD5_01_512.05908.05908.3	18/44	DWNGTVVMQKADQS	F1MMN6	1375.66
0.999999	1	10ul_Azm_Preg4_31dec18_RD5_01_512.05954.05954.3	22/80	NSSLIKHQRIHAGEKPHKCTECS	G3X6V5	2515.25
0.999999	1	10ul_Azm_Preg4_31dec18_RD5_01_512.05981.05981.3	17/52	GAGNGEDVGLDNFEGS	G3MZB1	1392.58
0.999999	1	10ul_Azm_Preg4_31dec18_RD5_01_512.06030.06030.3	19/64	ATPPGWQATSPGWQAPPQG	G3MYI7	1804.85
0.999999	1	10ul_Azm_Preg4_31dec18_RD5_01_512.06033.06033.3	22/96	LAASEDGTVYVGDAHTNTVWKFTSTEK	P10731	2685.22
0.999999	1	10ul_Azm_Preg4_31dec18_RD5_01_512.06068.06068.3	25/60	QAVKDHNVGSPPKSPTHA	L8IXX5	1669.85
0.999999	1	10ul_Azm_Preg4_31dec18_RD5_01_512.06100.06100.3	15/40	VCYMPESKYAVVK	G3MWG4	1345.6
0.999999	1	10ul_Azm_Preg4_31dec18_RD5_01_512.06107.06107.3	26/80	EGSLLFEAASLLLWGDAGLSLEL	E1BP92	2161.13
0.999999	1	10ul_Azm_Preg4_31dec18_RD5_01_512.06111.06111.3	16/36	ACEYLSEEDYMD	Q1JP63	1353.47
0.999999	1	10ul_Azm_Preg4_31dec18_RD5_01_512.06117.06117.3	24/80	EEAATATAGAGAAGPGASGVTGV	F1N1X8	1643.78
0.999999	1	10ul_Azm_Preg4_31dec18_RD5_01_512.06161.06161.3	15/52	ASAVASPPEVVRAAQK	Q0VC07	1380.74
0.999999	1	10ul_Azm_Preg4_31dec18_RD5_01_512.06163.06163.3	19/48	PVPAGTTAAAIPRRH	L8IU36	1279.74
0.999999	1	10ul_Azm_Preg4_31dec18_RD5_01_512.06172.06172.3	24/100	LTVAPAGCAVSALATSQVGAWPAETPGL	L8HZ32	2468.2
0.999999	1	10ul_Azm_Preg4_31dec18_RD5_01_512.06263.06263.3	21/108	FLVNFRDLVRRQPLSHCDLVLLSLSLTRLV	F1MZD2	3332.89
0.999999	1	10ul_Azm_Preg4_31dec18_RD5_01_512.06269.06269.3	21/48	RCRSTHLGPALQTQC	Q2KID9	1467.73
0.999999	1	10ul_Azm_Preg4_31dec18_RD5_01_512.06290.06290.3	23/68	MAMYKKSLHINGGGSAAEQR	E1BK52	1860.92
0.999999	1	10ul_Azm_Preg4_31dec18_RD5_01_512.06316.06316.3	20/64	GPSCQDCDAGYTRMPSGLY	F1MER7	1929.77
0.999999	1	10ul_Azm_Preg4_31dec18_RD5_01_512.06381.06381.3	19/64	NSGSAAAAASKPGEKGDKV	G3MYL8	1530.76
0.999999	1	10ul_Azm_Preg4_31dec18_RD5_01_512.06409.06409.3	20/80	PMQPPRPPAPAPVPAARPPPPAP	G3MY25	2111.15
0.999999	1	10ul_Azm_Preg4_31dec18_RD5_01_512.06470.06470.3	25/64	LPGTAGGPGLKGNEGPAGP	Q32S24	1435.71
0.999999	1	10ul_Azm_Preg4_31dec18_RD5_01_512.06505.06505.3	17/44	CSLKIQSTEPQDSA	F1N5M3	1331.66
0.999999	1	10ul_Azm_Preg4_31dec18_RD5_01_512.06533.06533.3	22/84	GVVGGGGGTKAPKPSFVSYVRPEE	E1BNH5	2188.16
0.999999	1	10ul_Azm_Preg4_31dec18_RD5_01_512.06564.06564.3	17/64	LKRQLHTQEGIEPSWQRWF	Q3ZBQ1	2178.11
0.999999	1	10ul_Azm_Preg4_31dec18_RD5_01_512.06575.06575.3	21/52	SSGRVGGTGLSAAAPV	A6H773	1199.63
0.999999	1	10ul_Azm_Preg4_31dec18_RD5_01_512.06592.06592.3	13/44	FSSCVDMGQGLLAR	L8I3C5	1252.54
0.999999	1	10ul_Azm_Preg4_31dec18_RD5_01_512.06622.06622.3	21/84	PSVRESADLGEFSPSAAVSTLFQP	G3MZA2	2297.12
0.999999	1	10ul_Azm_Preg4_31dec18_RD5_01_512.06722.06722.3	16/44	PDTGARLSDKDAQN	F1N5S8	1275.61
0.999999	1	10ul_Azm_Preg4_31dec18_RD5_01_512.06724.06724.3	21/56	GPSPARASPVNRPSLAT	F1MLB1	1518.83
0.999999	1	10ul_Azm_Preg4_31dec18_RD5_01_512.06758.06758.3	26/92	ANDVNMIKTAHIGVGISGQEGMQAVM	E1BPC3	2500.2
0.999999	1	10ul_Azm_Preg4_31dec18_RD5_01_512.06872.06872.3	18/52	ATLPRASSVISTAEGT	L8IWC4	1387.73
0.999999	1	10ul_Azm_Preg4_31dec18_RD5_01_512.06882.06882.3	21/56	LGTQRDSDENLSDTLQK	F1MC90	1677.74
0.999999	1	10ul_Azm_Preg4_31dec18_RD5_01_512.07031.07031.3	20/64	TLITAPSGVEAQPVHDLPV	L8HQM0	1742.92
0.999999	1	10ul_Azm_Preg4_31dec18_RD5_01_512.07052.07052.3	18/44	SCRIAMMAATASAN	Q0VC09	1284.56
0.999999	1	10ul_Azm_Preg4_31dec18_RD5_01_512.07088.07088.3	21/80	AVPPPAAGNAHLQPVATLYPGRA	Q2HJ78	2125.14
0.999999	1	10ul_Azm_Preg4_31dec18_RD5_01_512.07112.07112.3	21/68	KTPPVAEAGWNLYIVNTISP	E1BPH4	1944
0.999999	1	10ul_Azm_Preg4_31dec18_RD5_01_512.07169.07169.3	16/44	TYEPVVRVPENNPA	Q9XT56	1411.71
0.999999	1	10ul_Azm_Preg4_31dec18_RD5_01_512.07218.07218.3	22/52	QMTAAASGSMSVPLMR	F1MRL4	1368.61
0.999999	1	10ul_Azm_Preg4_31dec18_RD5_01_512.07236.07236.3	19/52	SPEDTSYDDSDILNST	A5D7S2	1569.63
0.999999	1	10ul_Azm_Preg4_31dec18_RD5_01_512.07262.07262.3	18/44	LMGLTDVLSVAVQH	L8IH21	1247.64
0.999999	1	10ul_Azm_Preg4_31dec18_RD5_01_512.07264.07264.3	16/60	RGPPGESGAAGPTGPIGS	P02465	1320.63
0.999999	1	10ul_Azm_Preg4_31dec18_RD5_01_512.07269.07269.3	19/80	AGPPPKRAAPSGPARSGSGGGMR	Q29RT0	1890.95
0.999999	1	10ul_Azm_Preg4_31dec18_RD5_01_512.07276.07276.3	27/104	CVPVIPLPSILKDDFNGNLHPDLWPEVYG	F1MUS6	3086.61
0.999999	1	10ul_Azm_Preg4_31dec18_RD5_01_512.07287.07287.3	19/44	VASANICNVVLMRY	L8I7C7	1362.67
0.999999	1	10ul_Azm_Preg4_31dec18_RD5_01_512.07294.07294.3	19/48	SSGGPVLSLAPLSTT	E1BDD9	1197.66
0.999999	1	10ul_Azm_Preg4_31dec18_RD5_01_512.07296.07296.3	14/36	LDEAVHEYKEKK	Q0VCZ2	1246.58
0.999999	1	10ul_Azm_Preg4_31dec18_RD5_01_512.07304.07304.3	22/56	RTASEPSAQLSYASSGR	A6QLD1	1454.65
0.999999	1	10ul_Azm_Preg4_31dec18_RD5_01_512.07459.07459.3	13/40	LCWARALPPRPGA	L8I9M0	1279.66
0.999999	1	10ul_Azm_Preg4_31dec18_RD5_01_512.07592.07592.3	1944-09-01	PTRAAWSAARASGT	Q32XW6	1203.61
0.999999	1	10ul_Azm_Preg4_31dec18_RD5_01_512.07608.07608.3	15/40	HSSLSLQMGPCQL	M5FMV8	1206.54
0.999999	1	10ul_Azm_Preg4_31dec18_RD5_01_512.07619.07619.3	14/48	VCEHVQVHTGEKSYK	G3N0N0	1572.7
0.999999	1	10ul_Azm_Preg4_31dec18_RD5_01_512.07636.07636.3	16/44	MRFGESNSTTWFQT	E1B9A0	1458.65
0.999999	1	10ul_Azm_Preg4_31dec18_RD5_01_512.07649.07649.3	16/44	PRPSTSQGCSRDAS	E1BGU2	1320.58
0.999999	1	10ul_Azm_Preg4_31dec18_RD5_01_512.07650.07650.3	16/48	EAGESPPPAPGTPKA	Q58DG7	1204.61
0.999999	1	10ul_Azm_Preg4_31dec18_RD5_01_512.07656.07656.3	16/44	PQYSIPSSYHKLRA	Q704V6	1477.77
0.999999	1	10ul_Azm_Preg4_31dec18_RD5_01_512.07675.07675.3	19/68	DTAQLDTDKLALPMSPSPLG	Q08DN1	1896.99
0.999999	1	10ul_Azm_Preg4_31dec18_RD5_01_512.07767.07767.3	19/48	LSDTAIGMMTRIAVL	A2VE70	1364.68
0.999999	1	10ul_Azm_Preg4_31dec18_RD5_01_512.07776.07776.3	26/76	PAGAPGAAGPGGPGGEPGKSGA	E1BME7	1547.73
0.999999	1	10ul_Azm_Preg4_31dec18_RD5_01_512.07897.07897.3	20/72	AATLVSEQPLQNYLDTEYFGT	P00792	2187.04
0.999999	1	10ul_Azm_Preg4_31dec18_RD5_01_512.07906.07906.3	13/44	ATGYISSAFFFGTA	Q9TTK6	1296.6
0.999999	1	10ul_Azm_Preg4_31dec18_RD5_01_512.07949.07949.3	14/44	LFTEGGVSWPRLGF	F1N7Q2	1304.65
0.999999	1	10ul_Azm_Preg4_31dec18_RD5_01_512.07997.07997.3	18/52	RVINEEYKIWKKNTPF	Q3MHL3	1760.95
0.999999	1	10ul_Azm_Preg4_31dec18_RD5_01_512.08014.08014.3	16/44	YGVCPAAFEDTPAR	L8ITD8	1233.53
0.999999	1	10ul_Azm_Preg4_31dec18_RD5_01_512.08103.08103.3	22/56	GKNFVSQIVAENLHPKG	F1MBM5	1722.94
0.999999	1	10ul_Azm_Preg4_31dec18_RD5_01_512.08134.08134.3	14/40	SDGWVGLGCCELA	E1BCI6	1264.52
0.999999	1	10ul_Azm_Preg4_31dec18_RD5_01_512.08208.08208.3	19/72	LEIYDGGDASAPRLGSFSGTT	F1MRN5	1898.86
0.999999	1	10ul_Azm_Preg4_31dec18_RD5_01_512.08258.08258.3	15/52	PLLGSEAEEALEAAGR	E1BLT9	1358.66
0.999999	1	10ul_Azm_Preg4_31dec18_RD5_01_512.08259.08259.3	14/44	SEPSNELSITADEA	F1MKB9	1303.58
0.999999	1	10ul_Azm_Preg4_31dec18_RD5_01_512.08274.08274.3	16/44	LSSPEGGLFQRHHP	F1MDH4	1350.64
0.999999	1	10ul_Azm_Preg4_31dec18_RD5_01_512.08307.08307.3	21/68	VLNKVEIGLDQSLSMPDDSY	B0JYK2	1975.94
0.999999	1	10ul_Azm_Preg4_31dec18_RD5_01_512.08356.08356.3	19/76	SLLRAPKSPDATVDMGRHEFTY	F1MWT0	2240.14
0.999999	1	10ul_Azm_Preg4_31dec18_RD5_01_512.08358.08358.3	18/72	YGTHVVAGAPPSAKMLTHPVL	E1BBW9	1868.99
0.999999	1	10ul_Azm_Preg4_31dec18_RD5_01_512.08370.08370.3	20/64	ENMSSGTADALGLSRAILC	Q2T9M1	1675.86
0.999999	1	10ul_Azm_Preg4_31dec18_RD5_01_512.08379.08379.3	17/60	LMTAAKLIAPVIETSFAV	E1BLX1	1677.9
0.999999	1	10ul_Azm_Preg4_31dec18_RD5_01_512.08412.08412.3	23/80	AEALVLMGTKANLVTPRNGEPLL	A4IF62	2238.2
0.999999	1	10ul_Azm_Preg4_31dec18_RD5_01_512.08490.08490.3	17/48	EEVDEDGSGTIDFEE	G3MZK7	1411.56
0.999999	1	10ul_Azm_Preg4_31dec18_RD5_01_512.08494.08494.3	23/96	GGSPGRRGPAPAAPASVPYSGTGQPGG	F1MD94	2291.14
0.999999	1	10ul_Azm_Preg4_31dec18_RD5_01_512.08566.08566.3	20/68	DRKLKTDREKIEKQPVHERN	F1N107	2289.3
0.999999	1	10ul_Azm_Preg4_31dec18_RD5_01_512.08567.08567.3	19/76	DPAVEKRPSRTGGKVIKSASAT	E1BK33	2038.16
0.999999	1	10ul_Azm_Preg4_31dec18_RD5_01_512.08747.08747.3	21/80	VLQPYEHLICGKNANGVLSLPAY	E1BMN7	2293.19
0.999999	1	10ul_Azm_Preg4_31dec18_RD5_01_512.09071.09071.3	14/40	VNISHPDMVDYRR	E1BK50	1361.6
0.999999	1	10ul_Azm_Preg4_31dec18_RD5_01_512.09081.09081.3	17/56	RARIGENCSIGPNVSLG	Q2YDJ9	1585.79
0.999999	1	10ul_Azm_Preg4_31dec18_RD5_01_512.09082.09082.3	21/80	GGRGLWHDDLLEPATKPSITGKF	F1N2I1	2290.21
0.999999	1	10ul_Azm_Preg4_31dec18_RD5_01_512.09097.09097.3	22/64	QKQQEIAAAAAATGGSVLN	A6QLS2	1584.85
0.999999	1	10ul_Azm_Preg4_31dec18_RD5_01_512.09230.09230.3	21/60	GCELAMMCDIIYAGEKAQ	Q58DM8	1889.8
0.999999	1	10ul_Azm_Preg4_31dec18_RD5_01_512.09375.09375.3	25/124	GALSTQTSTASMVQPPQGDVEAMYPALPPYSNCS	E1BBZ7	3410.55
0.999999	1	10ul_Azm_Preg4_31dec18_RD5_01_512.09401.09401.3	20/88	SAKLKLEPGKADPFPTAPAHGACLP	F1MYT2	2388.26
0.999999	1	10ul_Azm_Preg4_31dec18_RD5_01_512.09408.09408.3	21/88	YHHHQPVPGYLDMPVVPGLGGPGES	L8I5L7	2389.16
0.999999	1	10ul_Azm_Preg4_31dec18_RD5_01_512.09516.09516.3	13/48	TGSKAWNSSATSDPT	E1BJI1	1306.58
0.999999	1	10ul_Azm_Preg4_31dec18_RD5_01_512.09540.09540.3	1952-12-01	GRALAAASALVAAPGL	L8HQ71	1237.71
0.999999	1	10ul_Azm_Preg4_31dec18_RD5_01_512.09586.09586.3	14/44	-MPGWFKKAWYGLA	G5E553	1498.74
0.999999	1	10ul_Azm_Preg4_31dec18_RD5_01_512.09599.09599.3	25/72	RAKEPRGVNGVGSSGPSEYME	F1N413	1936.89
0.999999	1	10ul_Azm_Preg4_31dec18_RD5_01_512.09704.09704.3	18/52	VKTEGSLGRVAEYTSL	L8IWN7	1496.75
0.999999	1	10ul_Azm_Preg4_31dec18_RD5_01_512.09817.09817.3	19/96	LSAGLPPLKASHSAHSTHSAHSTHSTH	A5D7D9	2505.21
0.999999	1	10ul_Azm_Preg4_31dec18_RD5_01_512.09827.09827.3	13/36	SCRPDCPTGMEY	P80012	1237.45
0.999999	1	10ul_Azm_Preg4_31dec18_RD5_01_512.09839.09839.3	22/52	RYFWVSGLSSTTRAAD	G3X6B1	1544.76
0.999999	1	10ul_Azm_Preg4_31dec18_RD5_01_512.09904.09904.3	19/88	GTLPSLLLGTLLTFTSGALGANPGL	Q2TBI0	2213.23
0.999999	1	10ul_Azm_Preg4_31dec18_RD5_01_512.09914.09914.3	18/64	CSSTQFLCADSEMCIPIWW	F1N6H1	2059.87
0.999999	1	10ul_Azm_Preg4_31dec18_RD5_01_512.09934.09934.3	22/64	LRRRRLDGAINRVPVGFYQ	F1MJI8	2044.16
0.999999	1	10ul_Azm_Preg4_31dec18_RD5_01_512.09938.09938.3	17/72	FIPALFKARMAHKKSLWTIEP	E1BED7	2239.27
0.999999	1	10ul_Azm_Preg4_31dec18_RD5_01_512.09982.09982.3	15/44	DMRASPDIISGRMT	Q2M2T3	1332.66
0.999999	1	10ul_Azm_Preg4_31dec18_RD5_01_512.10085.10085.3	22/88	KLQKLLLHSNRLASLESGLLDSLRA	L8I5K4	2575.48
0.999999	1	10ul_Azm_Preg4_31dec18_RD5_01_512.10123.10123.3	19/68	YGMYSDDDANSDASSVCSER	E1BGU2	1908.66
0.999999	1	10ul_Azm_Preg4_31dec18_RD5_01_512.10126.10126.3	1944-12-01	TPAGRRLSSLPLAT	F6Q0H8	1236.73
0.999999	1	10ul_Azm_Preg4_31dec18_RD5_01_512.10154.10154.3	17/64	AETQATKAIVYIEEMNSMA	L8I6U2	1972.91
0.999999	1	10ul_Azm_Preg4_31dec18_RD5_01_512.10164.10164.3	25/88	VKEDTLACGVSVQKRGMMVTGSSTG	A7MB85	2441.17
0.999999	1	10ul_Azm_Preg4_31dec18_RD5_01_512.10185.10185.3	20/80	FPRRKAESIGLAMARTGGMVVIT	Q08537	2212.23
0.999999	1	10ul_Azm_Preg4_31dec18_RD5_01_512.10192.10192.3	19/76	VSGVWWAFTLIIISSYTANLAA	L8IGP8	2212.16
0.999999	1	10ul_Azm_Preg4_31dec18_RD5_01_512.10220.10220.3	17/72	LGHPAGARGRGELCLDLPEAP	Q1LZH7	1974.97
0.999999	1	10ul_Azm_Preg4_31dec18_RD5_01_512.10267.10267.3	23/96	GGFPLPPLSPGGGAVAAALGAPPPPAG	E1BJD1	2178.18
0.999999	1	10ul_Azm_Preg4_31dec18_RD5_01_512.10352.10352.3	13/52	EEGTVELGPKGLWKED	G5E533	1541.81
0.999999	1	10ul_Azm_Preg4_31dec18_RD5_01_512.10461.10461.3	1944-12-01	AKPSPFEGKTSTEP	E1BF96	1306.64
0.999999	1	10ul_Azm_Preg4_31dec18_RD5_01_512.10490.10490.3	21/96	AAAPTSPATAGSPATAAGPATAMEEAK	L8IZC2	2214.01
0.999999	1	10ul_Azm_Preg4_31dec18_RD5_01_512.10546.10546.3	20/76	TVSNPEEAAYIQEITTADGQMV	E1BPQ2	2165.98
0.999999	1	10ul_Azm_Preg4_31dec18_RD5_01_512.10597.10597.3	22/64	PSSQGFANSVAAAPSARDK	E1BFC1	1634.76
0.999999	1	10ul_Azm_Preg4_31dec18_RD5_01_512.10707.10707.3	13/48	RPGADGGRGMPGEPG	Q28083	1196.52
0.999999	1	10ul_Azm_Preg4_31dec18_RD5_01_512.10822.10822.3	1944-12-01	ATKVKVLNMAEIQT	G3X6Z1	1372.77
0.999999	1	10ul_Azm_Preg4_31dec18_RD5_01_512.10830.10830.3	1952-10-01	AIPPLKRTNTVRTSRE	G3X7A6	1637.97
0.999999	1	10ul_Azm_Preg4_31dec18_RD5_01_512.10920.10920.3	16/56	QAARQASRSTAYEDYYY	A3KMV6	1750.79
0.999999	1	10ul_Azm_Preg4_31dec18_RD5_01_512.10932.10932.3	19/68	KSLKGNSHALATVTAIIDGT	E1B9Q0	1766.95
0.999999	1	10ul_Azm_Preg4_31dec18_RD5_01_512.11034.11034.3	15/52	GKKASRMKKEASVKFH	F1N3F6	1652.94
0.999999	1	10ul_Azm_Preg4_31dec18_RD5_01_512.11079.11079.3	20/56	LPADAETLPGNPEDHEK	G3MYQ3	1590.68
0.999999	1	10ul_Azm_Preg4_31dec18_RD5_01_512.11098.11098.3	14/44	LTLYVYLLQCLNSE	L8IRZ7	1485.75
0.999999	1	10ul_Azm_Preg4_31dec18_RD5_01_512.11153.11153.3	19/64	AELMAHPGYPSVPPLGGCG	F1MC73	1780.83
0.999999	1	10ul_Azm_Preg4_31dec18_RD5_01_512.11177.11177.3	22/84	QPQNLIMASLPGVMAIGPGEPASL	L8IVG6	2165.09
0.999999	1	10ul_Azm_Preg4_31dec18_RD5_01_512.11188.11188.3	15/56	KPGMPNVSNDLSQKLYA	E1B8D6	1677.8
0.999999	1	10ul_Azm_Preg4_31dec18_RD5_01_512.11278.11278.3	21/64	LLAYEPLGPALLLAPAPTP	L8I9Q3	1705.97
0.999999	1	10ul_Azm_Preg4_31dec18_RD5_01_512.11298.11298.3	15/52	HVDHPSLQSPITVEWR	L8ISC9	1606.8
0.999999	1	10ul_Azm_Preg4_31dec18_RD5_01_512.11313.11313.3	19/64	EHSAPKWNWNCAGKYKWSS	F1N2N3	2118.98
0.999999	1	10ul_Azm_Preg4_31dec18_RD5_01_512.11323.11323.3	16/56	VLILGASGGVGTFAIQV	Q0VC50	1402.78
0.999999	1	10ul_Azm_Preg4_31dec18_RD5_01_512.11336.11336.3	18/68	DIKPGTPPISGRSTTPTSSP	G3X6B3	1782.95
0.999999	1	10ul_Azm_Preg4_31dec18_RD5_01_512.11370.11370.3	1944-10-01	LRIDRACRQETFAY	Q2TBW3	1521.75
0.999999	1	10ul_Azm_Preg4_31dec18_RD5_01_512.11392.11392.3	20/56	LAALASVLAGLCYGEFG	L8I6J8	1540.76
0.999999	1	10ul_Azm_Preg4_31dec18_RD5_01_512.11397.11397.3	26/100	RSPMAAFLMQTKDNPMKAVGVLAGIMAL	Q8WN91	2707.36
0.999999	1	10ul_Azm_Preg4_31dec18_RD5_01_512.11402.11402.3	15/48	PKYCEPVVKGEANER	A5PJS5	1521.71
0.999999	1	10ul_Azm_Preg4_31dec18_RD5_01_512.11412.11412.3	17/56	PSQTHNNLYAWGQETGA	Q3SZN2	1704.75
0.999999	1	10ul_Azm_Preg4_31dec18_RD5_01_512.11449.11449.3	18/52	TRSVRGGMRARPPAGP	G3MY48	1482.8
0.999999	1	10ul_Azm_Preg4_31dec18_RD5_01_512.11458.11458.3	21/76	SSFSSSGTGFGEGLKAGSSWQC	E1BIX5	1975.89
0.999999	1	10ul_Azm_Preg4_31dec18_RD5_01_512.11483.11483.3	16/64	QSPALRDRHWHQLMTAIGV	F1N724	2004.01
0.999999	1	10ul_Azm_Preg4_31dec18_RD5_01_512.11690.11690.3	24/72	PAASSIWSPASISPGSAPASV	L8HPH7	1742.85
0.999999	1	10ul_Azm_Preg4_31dec18_RD5_01_512.11728.11728.3	23/72	TFNDMFIRISTRLPSKYLYGF	G3MY87	2320.2
0.999999	1	10ul_Azm_Preg4_31dec18_RD5_01_512.11763.11763.3	20/64	LTPQGTPVDADDAQKQLAA	Q0VC16	1753.85
0.999999	1	10ul_Azm_Preg4_31dec18_RD5_01_512.11771.11771.3	17/44	KTLRIQPMQEGFQL	A8QQJ5	1446.73
0.999999	1	10ul_Azm_Preg4_31dec18_RD5_01_512.11852.11852.3	14/52	SQIIGETSSASTGYFS	G3MWL2	1459.68
0.999999	1	10ul_Azm_Preg4_31dec18_RD5_01_512.11885.11885.3	14/44	SLTDAFSNCSYGHL	G3N3C2	1370.56
0.999999	1	10ul_Azm_Preg4_31dec18_RD5_01_512.11894.11894.3	1936-11-01	DIIESTHDYWRA	P37980	1318.63
0.999999	1	10ul_Azm_Preg4_31dec18_RD5_01_512.11915.11915.3	20/72	YKGLIGDDNYLALKNSQGKYL	L8J2B1	2096.09
0.999999	1	10ul_Azm_Preg4_31dec18_RD5_01_512.11932.11932.3	23/80	NQLSRKHSLDDGVVAMTVVLPSG	A0JNG1	2251.2
0.999999	1	10ul_Azm_Preg4_31dec18_RD5_01_512.12005.12005.3	17/56	EISLYSEEGLKGEQVKL	A8E4N1	1678.88
0.999999	1	10ul_Azm_Preg4_31dec18_RD5_01_512.12014.12014.3	16/44	RVHSDERPYPCPEC	E1BH42	1484.64
0.999999	1	10ul_Azm_Preg4_31dec18_RD5_01_512.12100.12100.3	19/52	LEEPRTVPPAALSPRG	E1BIC4	1518.82
0.999999	1	10ul_Azm_Preg4_31dec18_RD5_01_512.12105.12105.3	16/56	DLITRMLQRDPKRRASL	L8IXA2	1840.06
0.999999	1	10ul_Azm_Preg4_31dec18_RD5_01_512.12116.12116.3	15/44	LPGSSVHGFSRKKR	J7S176	1285.69
0.999999	1	10ul_Azm_Preg4_31dec18_RD5_01_512.12119.12119.3	19/72	QRPVIPPQSHRDDRETLVSEH	Q5EA97	2230.15
0.999999	1	10ul_Azm_Preg4_31dec18_RD5_01_512.12143.12143.3	23/72	KHPQRGYLPVQSVLEADYNET	L8I8Q9	2214.07
0.999999	1	10ul_Azm_Preg4_31dec18_RD5_01_512.12205.12205.3	20/72	LMMSSCLWASATPHPSLAWMV	Q58CQ6	2178.94
0.999999	1	10ul_Azm_Preg4_31dec18_RD5_01_512.12275.12275.3	15/68	EEDDGEAEDAAQPSRSPAPQ	A5D7M0	1840.77
0.999999	1	10ul_Azm_Preg4_31dec18_RD5_01_512.12321.12321.3	24/88	RGEAAGSGKPVAVKEPQELPPKAPV	G3N0M1	2256.21
0.999999	1	10ul_Azm_Preg4_31dec18_RD5_01_512.12350.12350.3	19/60	LKEPIHIPKTAPATRQKG	F1MLS2	1814.05
0.999999	1	10ul_Azm_Preg4_31dec18_RD5_01_512.12368.12368.3	17/48	AQQPREIIMESSSTP	G3N2A9	1520.71
0.999999	1	10ul_Azm_Preg4_31dec18_RD5_01_512.12395.12395.3	21/64	GVGGVPGVGIPAAAAAKAA	P04985	1404.81
0.999999	1	10ul_Azm_Preg4_31dec18_RD5_01_512.12411.12411.3	20/60	STEVIQPSKSTARTHGVN	F2FB38	1709.91
0.999999	1	10ul_Azm_Preg4_31dec18_RD5_01_512.12481.12481.3	25/96	PSQPGQASSNASTPLPALPLYPDPVRL	L8J4U5	2562.31
0.999999	1	10ul_Azm_Preg4_31dec18_RD5_01_512.12484.12484.3	15/68	LPNGDYLNMSPSDAGTAGTP	F1MJE0	1782.74
0.999999	1	10ul_Azm_Preg4_31dec18_RD5_01_512.12641.12641.3	16/52	DSFPMEIRQYLAQWLE	Q05FF2	1780.9
0.999999	1	10ul_Azm_Preg4_31dec18_RD5_01_512.12749.12749.3	13/48	LPGMTPQTPVVTPKQ	Q9GL34	1367.71
0.999999	1	10ul_Azm_Preg4_31dec18_RD5_01_512.12756.12756.3	15/44	DFNNEIYCQDASCS	F1MTV3	1519.57
0.999999	1	10ul_Azm_Preg4_31dec18_RD5_01_512.12781.12781.3	19/52	CRNVAKLLYMHMLGYP	G3MZH4	1707.9
0.999999	1	10ul_Azm_Preg4_31dec18_RD5_01_512.12882.12882.3	1944-12-01	LTLKVLRSSSCGDT	A7Z071	1321.67
0.999999	1	10ul_Azm_Preg4_31dec18_RD5_01_512.12988.12988.3	21/60	RPTQNTFSIAYGSGSMKG	M0QVZ7	1687.79
0.999999	1	10ul_Azm_Preg4_31dec18_RD5_01_512.12997.12997.3	20/72	TTSFVLRGLEPGQEYSILLTA	L8I7T7	2122.13
0.999999	1	10ul_Azm_Preg4_31dec18_RD5_01_512.13027.13027.3	18/72	LAAIALESSENSRSTPEEGEE	G3N360	1975.9
0.999999	1	10ul_Azm_Preg4_31dec18_RD5_01_512.13035.13035.3	20/68	MFVKISQPKKRAETLMFSNN	F1MYR9	2123.16
0.999999	1	10ul_Azm_Preg4_31dec18_RD5_01_512.13071.13071.3	18/84	QPAGVGAGGLCAKSNPAGFLESKS	L8ID86	2087.05
0.999999	1	10ul_Azm_Preg4_31dec18_RD5_01_512.13110.13110.3	25/96	GGLMGPSSMSSMGMNSTRAVGMAPLYA	G3N1J5	2580.11
0.999999	1	10ul_Azm_Preg4_31dec18_RD5_01_512.13124.13124.3	16/44	PGKPEHLLEGSTWQ	F1MBK6	1352.67
0.999999	1	10ul_Azm_Preg4_31dec18_RD5_01_512.13162.13162.3	18/52	AQTELGQQILADFEEA	E1BJW7	1619.77
0.999999	1	10ul_Azm_Preg4_31dec18_RD5_01_512.13170.13170.3	20/80	RSVKESSNKSKKSSPQTGSLHPE	G3X876	2212.14
0.999999	1	10ul_Azm_Preg4_31dec18_RD5_01_512.13179.13179.3	22/72	TGPEYEALDALPDAERRVRRL	L8II64	2212.13
0.999999	1	10ul_Azm_Preg4_31dec18_RD5_01_512.13192.13192.3	19/80	SRRTSFSEDSSLGRSSQGNTGSL	L8IDB4	2215.02
0.999999	1	10ul_Azm_Preg4_31dec18_RD5_01_512.13338.13338.3	13/44	LAWSHASPSAVPQV	F1MD25	1236.59
0.999999	1	10ul_Azm_Preg5_31dec18_RD1_01_518.00485.00485.3	1948-09-01	RMPLHEGSPLGELHR	F1MKH0	1415.69
0.999999	1	10ul_Azm_Preg5_31dec18_RD1_01_518.02388.02388.3	13/60	VSEGGVLSESSTTATITV	F1N0A6	1538.73
0.999999	1	10ul_Azm_Preg5_31dec18_RD1_01_518.02560.02560.3	17/68	VAFCIAFGLSYGMVGALQFE	F1N0Z7	1950.94
0.999999	1	10ul_Azm_Preg5_31dec18_RD1_01_518.02632.02632.3	21/60	SSGRKARGPQGDGLAPQG	E1BMS6	1593.83
0.999999	1	10ul_Azm_Preg5_31dec18_RD1_01_518.02644.02644.3	15/60	QRSPGDVAAAQSPGAQDM	Q08DX6	1525.71
0.999999	1	10ul_Azm_Preg5_31dec18_RD1_01_518.02785.02785.3	15/84	DSEVAQAGKAVALYFEDKLTEIYS	F1MNE1	2444.25
0.999999	1	10ul_Azm_Preg5_31dec18_RD1_01_518.02803.02803.3	17/76	VPAVGFTLLPSLGGFLGAQYTR	P30535	2008.07
0.999999	1	10ul_Azm_Preg5_31dec18_RD1_01_518.02831.02831.3	17/84	LKSKRKDNLNDDGVDLKTQPVRNT	L8IWY1	2539.35
0.999999	1	10ul_Azm_Preg5_31dec18_RD1_01_518.02911.02911.3	16/112	PTLGSPQELIFSVQYSVITPLMNPLIYSLKN	L8HYK7	3250.76
0.999999	1	10ul_Azm_Preg5_31dec18_RD1_01_518.02984.02984.3	18/92	DSDDDLPRLGSSREGSLSNSQGLGWY	F1MW16	2532.18
0.999999	1	10ul_Azm_Preg5_31dec18_RD1_01_518.03053.03053.3	23/100	AMAMVTGGWGGPGGGGDTNGVDKAGGYP	L8HQB8	2368.02
0.999999	1	10ul_Azm_Preg5_31dec18_RD1_01_518.03106.03106.3	20/92	SVMDLMLISTIVPRMAIDYLMGHGSL	E1BJ58	2678.33
0.999999	1	10ul_Azm_Preg5_31dec18_RD1_01_518.03135.03135.3	20/56	RSPPLLLLLPQLGIGIA	E1BAD1	1542.97
0.999999	1	10ul_Azm_Preg5_31dec18_RD1_01_518.03136.03136.3	12/128	QPSEVELEEYYPAFLDMVRSLLEGSIDPTQYEDTL	E1BGW5	3850.77
0.999999	1	10ul_Azm_Preg5_31dec18_RD1_01_518.03232.03232.3	23/84	LFSMNLYTTYILMGRWALGSLACD	L8IQ56	2567.24
0.999999	1	10ul_Azm_Preg5_31dec18_RD1_01_518.03246.03246.3	25/92	PGPADEAGSEEAGPAGESRGSQASFM	F1MW86	2262.96
0.999999	1	10ul_Azm_Preg5_31dec18_RD1_01_518.03269.03269.3	23/92	YLARFKNDREKALKAMEMTWNNMEKK	L8HWG7	2953.47
0.999999	1	10ul_Azm_Preg5_31dec18_RD1_01_518.03370.03370.3	14/48	HQGLNGNMNLDTLEG	E1BFH9	1417.65
0.999999	1	10ul_Azm_Preg5_31dec18_RD1_01_518.03382.03382.3	17/84	DGKIYATGGIVSSEGPALGNMEAY	F1MN31	2137.04
0.999999	1	10ul_Azm_Preg5_31dec18_RD1_01_518.03399.03399.3	20/56	QLSTHSEDAEEFDFGDT	Q29466-2	1697.67
0.999999	1	10ul_Azm_Preg5_31dec18_RD1_01_518.03464.03464.3	18/60	LLRTTPGTADSRERVSTG	A4FUG7	1745.9
0.999999	1	10ul_Azm_Preg5_31dec18_RD1_01_518.03479.03479.3	22/92	VLEGKGAGKKGRFQGKATKMSRRAEV	Q32LK1	2606.42
0.999999	1	10ul_Azm_Preg5_31dec18_RD1_01_518.03482.03482.3	21/80	KAMESKLLIGGRNIMDHTNEQQK	A0JN40	2384.16
0.999999	1	10ul_Azm_Preg5_31dec18_RD1_01_518.03522.03522.3	21/108	SFVILDWDKPLNDTVTEYEVISRENGSFSG	F1N3L5	3272.59
0.999999	1	10ul_Azm_Preg5_31dec18_RD1_01_518.03535.03535.3	19/72	NVRDLDFTVDLDFKGQLCETS	L8HUQ4	2270.09
0.999999	1	10ul_Azm_Preg5_31dec18_RD1_01_518.03538.03538.3	23/52	NPTIGASFMTKTVQYQ	A5PJP3	1558.77
0.999999	1	10ul_Azm_Preg5_31dec18_RD1_01_518.03560.03560.3	19/76	FCEGPSVRNLACMDTHVIEMVD	E1B7N7	2349.02
0.999999	1	10ul_Azm_Preg5_31dec18_RD1_01_518.03616.03616.3	20/104	ELPGFTLPGITSQEPGLEQENVVSLEGVT	Q2TA21	2809.44
0.999999	1	10ul_Azm_Preg5_31dec18_RD1_01_518.03655.03655.3	21/72	MMSHFLCAVSEKPPSGEKPSV	F1MB07	2102.98
0.999999	1	10ul_Azm_Preg5_31dec18_RD1_01_518.03789.03789.3	18/64	NMTAVGITENVKGDAKKFE	E1BK14	1823.95
0.999999	1	10ul_Azm_Preg5_31dec18_RD1_01_518.03800.03800.3	19/48	EKWKAKKMEYLKEKN	A4IFQ4	1708.97
0.999999	1	10ul_Azm_Preg5_31dec18_RD1_01_518.03859.03859.3	13/48	ELRAEITGPDGTRLP	A7MB36	1397.76
0.999999	1	10ul_Azm_Preg5_31dec18_RD1_01_518.03906.03906.3	20/96	LAGLGPGEDAESDEDSQPEDPGTPSSP	Q17QU7	2442.98
0.999999	1	10ul_Azm_Preg5_31dec18_RD1_01_518.03993.03993.3	24/100	PYAPPEWSQGDSGMTPVPNTPRLSPEQH	E1BE71	2840.31
0.999999	1	10ul_Azm_Preg5_31dec18_RD1_01_518.04015.04015.3	23/92	-MAAPEVLESDLPNAVALLKNLQEQV	Q2KII6	2608.34
0.999999	1	10ul_Azm_Preg5_31dec18_RD1_01_518.04044.04044.3	20/56	ARGKEADISGGQVSPGE	E1BM58	1456.73
0.999999	1	10ul_Azm_Preg5_31dec18_RD1_01_518.04052.04052.3	21/80	NTSHKDYDLSIANGLFAEKVFDL	E1BAU7	2369.15
0.999999	1	10ul_Azm_Preg5_31dec18_RD1_01_518.04085.04085.3	20/112	SPVQANSSSGKTAGAPTGTVPQQLQVHGVQQ	L8J3M2	2843.45
0.999999	1	10ul_Azm_Preg5_31dec18_RD1_01_518.04104.04104.3	13/44	QETLNLEPDVAQHL	E1BM39	1364.66
0.999999	1	10ul_Azm_Preg5_31dec18_RD1_01_518.04125.04125.3	22/72	RQKDGDDEWTSVVVANVSKYL	Q6Q146	2139.01
0.999999	1	10ul_Azm_Preg5_31dec18_RD1_01_518.04138.04138.3	13/40	ARCDASIARLSAE	F1N4N5	1218.61
0.999999	1	10ul_Azm_Preg5_31dec18_RD1_01_518.04171.04171.3	19/68	GDHMGMHTGEKLYEYKECHQ	E1BLQ2	2263.94
0.999999	1	10ul_Azm_Preg5_31dec18_RD1_01_518.04175.04175.3	19/88	EKKLDVTKENMLPENIAYLPNADLN	L8I5W8	2628.38
0.999999	1	10ul_Azm_Preg5_31dec18_RD1_01_518.04201.04201.3	23/76	LKQNVLVPREESSSVSDMEFHK	E1B930	2333.1
0.999999	1	10ul_Azm_Preg5_31dec18_RD1_01_518.04215.04215.3	14/48	AAALGNRSDAGRPPL	E1BBJ9	1280.66
0.999999	1	10ul_Azm_Preg5_31dec18_RD1_01_518.04225.04225.3	19/64	QSRGFGELLSTTKQDFVLE	L8IMV9	1896.99
0.999999	1	10ul_Azm_Preg5_31dec18_RD1_01_518.04236.04236.3	20/56	SDGQPGPPGPPGTAGFP	P04258	1350.62
0.999999	1	10ul_Azm_Preg5_31dec18_RD1_01_518.04240.04240.3	18/56	QGIPYTLNGKKVEVAVK	F1N412	1586.9
0.999999	1	10ul_Azm_Preg5_31dec18_RD1_01_518.04299.04299.3	24/104	SRSSSLRSSSSLSSQGSVASSIGSQTSFR	A3KN19	2676.3
0.999999	1	10ul_Azm_Preg5_31dec18_RD1_01_518.04310.04310.3	23/132	PSEKPPTTELPGMDFADLQDPPMFPIAHLISRGPMP	Q9XSX7	3766.8
0.999999	1	10ul_Azm_Preg5_31dec18_RD1_01_518.04317.04317.3	26/112	DPTAFKVTVTVVLILLILITIAGNVVVCLAV	L8IRW0	3049.86
0.999999	1	10ul_Azm_Preg5_31dec18_RD1_01_518.04393.04393.3	22/108	YSYCSRSPCQNGGTCINARTSFICACRHPF	A5PJU2	3316.42
0.999999	1	10ul_Azm_Preg5_31dec18_RD1_01_518.04403.04403.3	25/124	GPTGPMGAMGPMGPRGMPGERGRLGPQGAPGQRG	F1N2Y2	3189.52
0.999999	1	10ul_Azm_Preg5_31dec18_RD1_01_518.04438.04438.3	18/68	QVSMEAGTVHVVIVGGGFGG	Q5BIR2	1714.87
0.999999	1	10ul_Azm_Preg5_31dec18_RD1_01_518.04500.04500.3	15/44	SLFTRPGLGTMVFR	L8HVT3	1337.72
0.999999	1	10ul_Azm_Preg5_31dec18_RD1_01_518.04549.04549.3	13/44	LLSTLSNGNSSKQK	F1MHA1	1234.62
0.999999	1	10ul_Azm_Preg5_31dec18_RD1_01_518.04612.04612.3	17/60	ALPRSPSAPGGAPTPGQN	F1MPI7	1488.77
0.999999	1	10ul_Azm_Preg5_31dec18_RD1_01_518.04617.04617.3	22/104	DKLCATMKLVSHLTAQLSELKEQMTEQRK	Q0V8I7	3188.64
0.999999	1	10ul_Azm_Preg5_31dec18_RD1_01_518.04637.04637.3	23/100	WMLLAKVAGASPMPDYSTVIEAWERMSS	F1MPS0	2868.39
0.999999	1	10ul_Azm_Preg5_31dec18_RD1_01_518.04651.04651.3	16/52	PGPRPSGTGAAGLPSG	L8IUV9	1223.63
0.999999	1	10ul_Azm_Preg5_31dec18_RD1_01_518.04652.04652.3	19/56	AVLPGKQVSPLPAQEGQ	F1MSK1	1518.84
0.999999	1	10ul_Azm_Preg5_31dec18_RD1_01_518.04694.04694.3	22/136	WNLKQQYYTGYTESEVLEVMRHMAKNVVRVSENMTKF	A0A140T859	4207.05
0.999999	1	10ul_Azm_Preg5_31dec18_RD1_01_518.04727.04727.3	18/64	QMQGNPTMVPLPPGVQPPL	A2VDM7	1774.87
0.999999	1	10ul_Azm_Preg5_31dec18_RD1_01_518.04728.04728.3	23/72	LQPPSTTPCPTVMRAEVPNQT	F1MBF2	2124.99
0.999999	1	10ul_Azm_Preg5_31dec18_RD1_01_518.04768.04768.3	21/68	LMETLKAIRLDGVDVIGYTA	L8IWR1	1993.06
0.999999	1	10ul_Azm_Preg5_31dec18_RD1_01_518.04787.04787.3	20/128	PLHQISDKVLYKNPARYYPVTNANRERGHNDQEEK	Q2T9M9	3953.95
0.999999	1	10ul_Azm_Preg5_31dec18_RD1_01_518.04799.04799.3	15/48	DVQPAISVRPPDDMS	F1MXP9	1423.71
0.999999	1	10ul_Azm_Preg5_31dec18_RD1_01_518.04806.04806.3	17/44	STSPSSMGGILYNS	L8HY53	1225.56
0.999999	1	10ul_Azm_Preg5_31dec18_RD1_01_518.04850.04850.3	23/104	FGMLKGLVGSKSLTREDMESVLDKMRDHL	Q3MHE8	3031.53
0.999999	1	10ul_Azm_Preg5_31dec18_RD1_01_518.04859.04859.3	23/84	HALGDLVQSVGVLIAAYIIRFKPE	L8IYB6	2342.37
0.999999	1	10ul_Azm_Preg5_31dec18_RD1_01_518.04869.04869.3	21/104	LKDLLDMMIAEEESLKERLIKSIAVCQKE	F1MRT3	3221.67
0.999999	1	10ul_Azm_Preg5_31dec18_RD1_01_518.04876.04876.3	23/68	FMGFAASLYYPQQAIVFVQV	Q148H0	2032.01
0.999999	1	10ul_Azm_Preg5_31dec18_RD1_01_518.04902.04902.3	20/68	LQYFLRGGTGLAAFSINQDT	L8IHR1	1956.97
0.999999	1	10ul_Azm_Preg5_31dec18_RD1_01_518.05010.05010.3	19/84	QRALNPLAPSQDTAMHVPAGSVTS	Q5EA47	2232.13
0.999999	1	10ul_Azm_Preg5_31dec18_RD1_01_518.05105.05105.3	17/48	GGSVDSSKKTSESKN	L8II70	1338.66
0.999999	1	10ul_Azm_Preg5_31dec18_RD1_01_518.05116.05116.3	17/68	TVIEQLDANRIRGNLRELSK	A7E2Z8	2095.15
0.999999	1	10ul_Azm_Preg5_31dec18_RD1_01_518.05167.05167.3	16/44	LRIIGQLALSGFQD	F1MZK6	1301.75
0.999999	1	10ul_Azm_Preg5_31dec18_RD1_01_518.05213.05213.3	17/92	GNSSPPNSHSASEVYVNEELEKDMQR	F1MNX4	2690.18
0.999999	1	10ul_Azm_Preg5_31dec18_RD1_01_518.05378.05378.3	19/52	APPPAAAVPGPSVPQP	A5PKK5	1283.69
0.999999	1	10ul_Azm_Preg5_31dec18_RD1_01_518.05387.05387.3	20/68	QVYPLINCMEGIPGGSPYAS	E1BI59	1936.91
0.999999	1	10ul_Azm_Preg5_31dec18_RD1_01_518.05420.05420.3	16/64	FASFMLGLGALVFSLPKFF	L8IZP8	1812.98
0.999999	1	10ul_Azm_Preg5_31dec18_RD1_01_518.05555.05555.3	15/60	EDLHRASLEGKSAKERPL	A6QLI8	1792.95
0.999999	1	10ul_Azm_Preg5_31dec18_RD1_01_518.05645.05645.3	13/52	YPALPNHGGPSTMVPA	A6H706	1389.67
0.999999	1	10ul_Azm_Preg5_31dec18_RD1_01_518.05717.05717.3	13/44	VVEPPSNLIATEVS	F1N401	1267.67
0.999999	1	10ul_Azm_Preg5_31dec18_RD1_01_518.05733.05733.3	16/48	LVLTPEQKTWLLDWN	G3N2C8	1627.86
0.999999	1	10ul_Azm_Preg5_31dec18_RD1_01_518.05758.05758.3	14/40	KRTGIKYKTNTSP	F1N578	1267.69
0.999999	1	10ul_Azm_Preg5_31dec18_RD1_01_518.06014.06014.3	18/64	LKVSDTSSSVSTATSTASE	F1N6D7	1614.76
0.999999	1	10ul_Azm_Preg5_31dec18_RD1_01_518.06095.06095.3	19/60	GPSPASPALPEGPRPSRP	E1BCD5	1614.85
0.999999	1	10ul_Azm_Preg5_31dec18_RD1_01_518.06129.06129.3	18/52	TPRVRKQTRLYSAVKE	E1BPM4	1701.02
0.999999	1	10ul_Azm_Preg5_31dec18_RD1_01_518.06161.06161.3	18/52	DCHFLDEGFTAKDILD	P27117	1664.79
0.999999	1	10ul_Azm_Preg5_31dec18_RD1_01_518.06175.06175.3	13/48	AEEPTVTAWGLEGSS	E1BKL4	1374.63
0.999999	1	10ul_Azm_Preg5_31dec18_RD1_01_518.06365.06365.3	15/60	APTPLLASLPAALPMASG	E1BEH2	1548.86
0.999999	1	10ul_Azm_Preg5_31dec18_RD1_01_518.06414.06414.3	1960-12-01	TRCPKPASQMGCSASGYL	Q5E9I7	1771.74
0.999999	1	10ul_Azm_Preg5_31dec18_RD1_01_518.06613.06613.3	18/56	TSFLPGELVPALAETAR	E1BMN0	1513.8
0.999999	1	10ul_Azm_Preg5_31dec18_RD1_01_518.06623.06623.3	13/52	RFPDPDADLELEPAAE	F1N1Q0	1498.68
0.999999	1	10ul_Azm_Preg5_31dec18_RD1_01_518.06704.06704.3	14/44	TALTPDMLAAEDAE	L8I6U2	1216.56
0.999999	1	10ul_Azm_Preg5_31dec18_RD1_01_518.06810.06810.3	18/44	AHVRVNWAMLEGCA	A7E3S5	1470.69
0.999999	1	10ul_Azm_Preg5_31dec18_RD1_01_518.06905.06905.3	21/72	NSSGSGGNVGPAASPTRSSDM	E1BHG3	1689.76
0.999999	1	10ul_Azm_Preg5_31dec18_RD1_01_518.07172.07172.3	18/56	LMYLGSLLFSSSTTAYL	G3N2H7	1639.78
0.999999	1	10ul_Azm_Preg5_31dec18_RD1_01_518.07194.07194.3	17/52	QLLGKMKTSASPFFLA	L8I064	1554.85
0.999999	1	10ul_Azm_Preg5_31dec18_RD1_01_518.07196.07196.3	16/56	SVVHGNLSEEAAKQMRS	E1BKY9	1667.84
0.999999	1	10ul_Azm_Preg5_31dec18_RD1_01_518.07358.07358.3	19/56	HLGPPPDDLPSYSANYS	Q58CX7	1604.74
0.999999	1	10ul_Azm_Preg5_31dec18_RD1_01_518.07393.07393.3	16/48	QQTLNDTVGRKIVMD	F1MG82	1489.79
0.999999	1	10ul_Azm_Preg5_31dec18_RD1_01_518.07660.07660.3	15/48	LRSAPSLQSRRSSFS	F1N6K7	1477.78
0.999999	1	10ul_Azm_Preg5_31dec18_RD1_01_518.07702.07702.3	15/60	GPGPGALPAANAYASIDF	F1MJE0	1483.73
0.999999	1	10ul_Azm_Preg5_31dec18_RD1_01_518.07740.07740.3	17/56	FSHLSRLEGLVLKDSSL	Q5I2M5	1639.89
0.999999	1	10ul_Azm_Preg5_31dec18_RD1_01_518.07747.07747.3	14/56	YLKPKGPQSLEIDTLMG	E1BA28	1684.91
0.999999	1	10ul_Azm_Preg5_31dec18_RD1_01_518.07785.07785.3	1944-12-01	KMHNYNYGGSLQET	E1BB52	1427.58
0.999999	1	10ul_Azm_Preg5_31dec18_RD1_01_518.07913.07913.3	17/52	AHPGTAAHGESASPEP	L8I844	1346.59
0.999999	1	10ul_Azm_Preg5_31dec18_RD1_01_518.07927.07927.3	16/52	SPLLQAFLHVGWNPAR	L8HRC5	1561.84
0.999999	1	10ul_Azm_Preg5_31dec18_RD1_01_518.07952.07952.3	14/52	EFACAPHGYGAIAAAP	Q32L83	1375.63
0.999999	1	10ul_Azm_Preg5_31dec18_RD1_01_518.07991.07991.3	16/48	QASEPGLFSVGLRTG	L8IAI5	1332.7
0.999999	1	10ul_Azm_Preg5_31dec18_RD1_01_518.08015.08015.3	1940-12-01	YTEEPAQTSCIEE	Q6H236	1263.53
0.999999	1	10ul_Azm_Preg5_31dec18_RD1_01_518.08074.08074.3	14/52	ALLGLKGNLEMTLASR	E1BAX4	1458.81
0.999999	1	10ul_Azm_Preg5_31dec18_RD1_01_518.08102.08102.3	18/76	LPTNIPGLGAAGPTGMFFGSAP	G3MZY8	1861.9
0.999999	1	10ul_Azm_Preg5_31dec18_RD1_01_518.08504.08504.3	13/44	FIPKPKPVNSMPTF	L8IYQ7	1307.73
0.999999	1	10ul_Azm_Preg5_31dec18_RD1_01_518.08519.08519.3	19/80	LGSEEALGAGTQGPSTPQAWGHL	A6QPE7	2036.92
0.999999	1	10ul_Azm_Preg5_31dec18_RD1_01_518.08593.08593.3	13/48	YHAQVGASDLYNYFT	A4FUH4	1483.67
0.999999	1	10ul_Azm_Preg5_31dec18_RD1_01_518.08686.08686.3	1948-09-01	AGGRRPRSSGSPSSP	F1N1F1	1286.64
0.999999	1	10ul_Azm_Preg5_31dec18_RD1_01_518.08693.08693.3	1948-11-01	TTLAISYLGRHTTEA	F1MII8	1460.76
0.999999	1	10ul_Azm_Preg5_31dec18_RD1_01_518.08708.08708.3	1944-12-01	ATYSVSDAVATYYL	E1BIF0	1338.6
0.999999	1	10ul_Azm_Preg5_31dec18_RD1_01_518.08745.08745.3	14/44	LSSSPADKLDSRFR	F1N2B8	1308.63
0.999999	1	10ul_Azm_Preg5_31dec18_RD1_01_518.08835.08835.3	1972-11-01	PGPSSKSGGGGGSSGGGGGGP	E1BAF6	1362.58
0.999999	1	10ul_Azm_Preg5_31dec18_RD1_01_518.08984.08984.3	21/64	PAMKAFVNLPTENELTFNA	L8IJT7	1937.96
0.999999	1	10ul_Azm_Preg5_31dec18_RD1_01_518.09018.09018.3	15/56	FVMLAVSLTPQTQGLIG	G3N069	1585.87
0.999999	1	10ul_Azm_Preg5_31dec18_RD1_01_518.09021.09021.3	16/56	QGRLTVAYHARARSAGH	G3MX13	1584.86
0.999999	1	10ul_Azm_Preg5_31dec18_RD1_01_518.09051.09051.3	1936-11-01	LHTQEKSYQCQH	F1N038	1307.56
0.999999	1	10ul_Azm_Preg5_31dec18_RD1_01_518.09208.09208.3	16/72	VMPRSSVNTQPSMKEESKMNL	F1MTU1	2211.99
0.999999	1	10ul_Azm_Preg5_31dec18_RD1_01_518.09377.09377.3	19/80	LPPRSESFSISGVQPARTPPMLR	L8HZ79	2253.16
0.999999	1	10ul_Azm_Preg5_31dec18_RD1_01_518.09398.09398.3	18/84	YGTYLCVASFPGAPVPDLSVEVNL	L8HZ53	2291.11
0.999999	1	10ul_Azm_Preg5_31dec18_RD1_01_518.09449.09449.3	19/72	TCHRVVSPQASFASCVYGQCG	E1BNL3	2211.96
0.999999	1	10ul_Azm_Preg5_31dec18_RD1_01_518.09468.09468.3	18/72	FCEFLTLCNLVLDCATCGSCS	F1MLU9	2291.94
0.999999	1	10ul_Azm_Preg5_31dec18_RD1_01_518.09478.09478.3	22/84	EGTRQAEAGGGAKALRPGLVKAKC	E1BDL6	2135.23
0.999999	1	10ul_Azm_Preg5_31dec18_RD1_01_518.09697.09697.3	21/80	EMYSASKPLKGARIAGCLHMTVE	Q3MHL4	2290.17
0.999999	1	10ul_Azm_Preg5_31dec18_RD1_01_518.09706.09706.3	21/88	SCQQSSAAASAAASPQLSSEIESLL	L8IGH3	2292.05
0.999999	1	10ul_Azm_Preg5_31dec18_RD1_01_518.09746.09746.3	17/76	VRTSEPLHDAQILNQMVTSSSN	A6QLW0	2213.07
0.999999	1	10ul_Azm_Preg5_31dec18_RD1_01_518.09809.09809.3	1952-12-01	FCRAQISMTTTGHLPL	Q32LN0	1571.75
0.999999	1	10ul_Azm_Preg5_31dec18_RD1_01_518.09832.09832.3	14/56	YSFRNLPSSASPPQPSP	F6R8E7	1570.77
0.999999	1	10ul_Azm_Preg5_31dec18_RD1_01_518.09885.09885.3	13/68	GGYAPADFSIGPMTLASAGT	G3X797	1724.81
0.999999	1	10ul_Azm_Preg5_31dec18_RD1_01_518.09893.09893.3	15/84	LRAAPPIRAAPQVPTAPPAPQMPT	G3MYI7	2249.21
0.999999	1	10ul_Azm_Preg5_31dec18_RD1_01_518.10011.10011.3	23/88	EPAENSQDLGSMSSLGPGISGPRGQ	F1MJZ7	2213.04
0.999999	1	10ul_Azm_Preg5_31dec18_RD1_01_518.10076.10076.3	20/88	PATCGQAGDLWGPAASPVGGGRLDM	E1BDN6	2212.03
0.999999	1	10ul_Azm_Preg5_31dec18_RD1_01_518.10100.10100.3	16/76	TNTQDPFLMFERPSKQVYQSES	Q864U1	2443.15
0.999999	1	10ul_Azm_Preg5_31dec18_RD1_01_518.10142.10142.3	19/88	PRPSQSSLHNRGTPLVLGAPRQSSP	F6QPK8	2444.3
0.999999	1	10ul_Azm_Preg5_31dec18_RD1_01_518.10154.10154.3	14/72	DIKKTHGGSSGSRGYYSSAFA	F1N1Z2	1988.97
0.999999	1	10ul_Azm_Preg5_31dec18_RD1_01_518.10278.10278.3	15/64	SQSLARRQGPGGEGPPASW	F1MSU8	1663.84
0.999999	1	10ul_Azm_Preg5_31dec18_RD1_01_518.10290.10290.3	14/56	LAADPSTCEICAYAACA	L8J104	1658.64
0.999999	1	10ul_Azm_Preg5_31dec18_RD1_01_518.10302.10302.3	18/76	WEVSALSRAVQKGFTKDVLKHL	E1BLB6	2212.23
0.999999	1	10ul_Azm_Preg5_31dec18_RD1_01_518.10330.10330.3	13/68	YQQGLTVHTGTHLLSMQGSP	L8IVU6	1909.93
0.999999	1	10ul_Azm_Preg5_31dec18_RD1_01_518.10341.10341.3	1952-10-01	TGNAGGSTEDLSSLDE	A6H727	1321.56
0.999999	1	10ul_Azm_Preg5_31dec18_RD1_01_518.10384.10384.3	16/64	TKPGPAMRRAMAEAVVGDD	F1MVX8	1754.89
0.999999	1	10ul_Azm_Preg5_31dec18_RD1_01_518.10482.10482.3	17/64	GWPEGGRLGAQWGSCCSHL	E1BN32	1943.82
0.999999	1	10ul_Azm_Preg5_31dec18_RD1_01_518.10517.10517.3	17/52	LEPTGDFTAGHREPPG	E1BKR0	1509.68
0.999999	1	10ul_Azm_Preg5_31dec18_RD1_01_518.10541.10541.3	18/64	FPRCGPLVLAPSLVVAGLS	E1BEZ1	1717.99
0.999999	1	10ul_Azm_Preg5_31dec18_RD1_01_518.10582.10582.3	14/56	CQSRSQQLITELTGFMK	F1MEF7	1753.87
0.999999	1	10ul_Azm_Preg5_31dec18_RD1_01_518.10645.10645.3	16/56	VKTEAPIQPEEQASASM	E1B805	1584.76
0.999999	1	10ul_Azm_Preg5_31dec18_RD1_01_518.10676.10676.3	17/64	PEQLAGVGQGRLAQERSAD	O62719	1768.92
0.999999	1	10ul_Azm_Preg5_31dec18_RD1_01_518.10767.10767.3	20/76	QVGFIDSEKRMNVALTRGRRHL	E1BG37	2341.26
0.999999	1	10ul_Azm_Preg5_31dec18_RD1_01_518.10788.10788.3	20/72	GSEEARLSVLPQVGKDGITRD	E1BLI8	2054.11
0.999999	1	10ul_Azm_Preg5_31dec18_RD1_01_518.10811.10811.3	14/48	YYYEDGGMKPRVMKE	Q2TA18	1588.74
0.999999	1	10ul_Azm_Preg5_31dec18_RD1_01_518.10843.10843.3	22/84	NSGSSLGLSLGSNSTVTASTRSSV	A1L505	2055.01
0.999999	1	10ul_Azm_Preg5_31dec18_RD1_01_518.10885.10885.3	18/68	SSPNIINQFGVPPSPANFIA	L8I7J4	1910.99
0.999999	1	10ul_Azm_Preg5_31dec18_RD1_01_518.10887.10887.3	13/52	VDECAGNPCRNGALCE	L8IG16	1592.61
0.999999	1	10ul_Azm_Preg5_31dec18_RD1_01_518.10939.10939.3	15/56	RASGELMTVAKWMREFL	Q32S38	1754.85
0.999999	1	10ul_Azm_Preg5_31dec18_RD1_01_518.10941.10941.3	19/56	QQLLKRMLVRKLCQPQS	L8IDI9	1910.11
0.999999	1	10ul_Azm_Preg5_31dec18_RD1_01_518.10968.10968.3	15/60	MTITSQTGLPEATSQGTL	F2FB38	1590.77
0.999999	1	10ul_Azm_Preg5_31dec18_RD1_01_518.10982.10982.3	1956-12-01	NKQTSSEGSSHKRSSSW	A8QDZ2	1591.76
0.999999	1	10ul_Azm_Preg5_31dec18_RD1_01_518.11011.11011.3	1944-12-01	QHPLDSQVAMNEFP	F1MDG6	1386.62
0.999999	1	10ul_Azm_Preg5_31dec18_RD1_01_518.11017.11017.3	20/72	LLGALPLPLLLLLPLLLLPPS	F1MYZ4	1988.34
0.999999	1	10ul_Azm_Preg5_31dec18_RD1_01_518.11041.11041.3	21/64	YERSMDALGKLLRTMMWDN	E1BM47	2052
0.999999	1	10ul_Azm_Preg5_31dec18_RD1_01_518.11069.11069.3	13/48	ASSGQKTVDCMTTMS	E1BPS3	1444.6
0.999999	1	10ul_Azm_Preg5_31dec18_RD1_01_518.11112.11112.3	16/64	FPPSAHQQPPHYTTSALQQ	F1MXE2	1858.9
0.999999	1	10ul_Azm_Preg5_31dec18_RD1_01_518.11283.11283.3	14/52	AMAASSCGTAAKDDSV	Q3ZCC3	1386.54
0.999999	1	10ul_Azm_Preg5_31dec18_RD1_01_518.11326.11326.3	14/48	ECQEVGYAYLELWPM	Q9GLM3	1626.74
0.999999	1	10ul_Azm_Preg5_31dec18_RD1_01_518.11367.11367.3	18/64	KVVKILQERNEFMNNNSSE	L8IJ63	2036.99
0.999999	1	10ul_Azm_Preg5_31dec18_RD1_01_518.11371.11371.3	1944-10-01	KGRKYPPMDPDSRA	L8J316	1417.68
0.999999	1	10ul_Azm_Preg5_31dec18_RD1_01_518.11425.11425.3	15/64	DMWSDSPSCTPSSPSVFSL	E1BG09	1857.76
0.999999	1	10ul_Azm_Preg5_31dec18_RD1_01_518.11548.11548.3	14/48	NVDQDSYLMKQQEHQ	A0A0H3V687	1635.72
0.999999	1	10ul_Azm_Preg5_31dec18_RD1_01_518.11573.11573.3	17/60	MSKYREQMFRLLMASKKD	A6QNS5	2031.08
0.999999	1	10ul_Azm_Preg5_31dec18_RD1_01_518.11574.11574.3	23/76	LMELMNVLELRKYEAIQLTFKQ	O97594	2468.32
0.999999	1	10ul_Azm_Preg5_31dec18_RD1_01_518.11593.11593.3	18/64	RDVHTKGIMYRAIEADIEK	L8IFW8	1959.97
0.999999	1	10ul_Azm_Preg5_31dec18_RD1_01_518.11786.11786.3	14/56	SRGASPIGPTVLAGLVV	L8J3V0	1406.82
0.999999	1	10ul_Azm_Preg5_31dec18_RD1_01_518.11939.11939.3	18/56	LFLQGVAAVFMFAFASL	A1L504	1620.8
0.999999	1	10ul_Azm_Preg5_31dec18_RD1_01_518.11973.11973.3	13/56	LSGCPIAAAEKLAMSQD	L8IRS2	1548.73
0.999999	1	10ul_Azm_Preg5_31dec18_RD1_01_518.12020.12020.3	13/44	CFSPSGHILASCST	F1MRF3	1261.58
0.999999	1	10ul_Azm_Preg5_31dec18_RD1_01_518.12027.12027.3	22/80	LYGTTKAIELLDPTANGFPTTTP	F1MDR8	2210.11
0.999999	1	10ul_Azm_Preg5_31dec18_RD1_01_518.12063.12063.3	18/68	VRRMINLHQLSLDHNLLDHL	L8IH88	2240.16
0.999999	1	10ul_Azm_Preg5_31dec18_RD1_01_518.12148.12148.3	19/64	QMLLLKVSAHITEQLGVAP	Q58DF3	1838.03
0.999999	1	10ul_Azm_Preg5_31dec18_RD1_01_518.12244.12244.3	1944-11-01	AIVNNAFKHSMEVG	A0A0N9H4L2	1387.69
0.999999	1	10ul_Azm_Preg5_31dec18_RD1_01_518.12255.12255.3	15/56	LPQEATIETTAISSSMV	F1N757	1564.73
0.999999	1	10ul_Azm_Preg5_31dec18_RD1_01_518.12403.12403.3	18/48	LILSGGTGTCSGLRS	F1MSX6	1277.64
0.999999	1	10ul_Azm_Preg5_31dec18_RD1_01_518.12419.12419.3	16/64	GPLRERLTIWAAMDSIPAP	F1MGG3	1955.03
0.999999	1	10ul_Azm_Preg5_31dec18_RD1_01_518.12469.12469.3	14/60	GMHKNEAISQQLHVLRKE	L8IRZ7	1947.05
0.999999	1	10ul_Azm_Preg5_31dec18_RD1_01_518.12496.12496.3	16/52	EELASALRRDSGQAFT	A6QNU0	1519.77
0.999999	1	10ul_Azm_Preg5_31dec18_RD1_01_518.12561.12561.3	15/72	PARMGPPATPGVGSTSWASQE	A6H735	1872.88
0.999999	1	10ul_Azm_Preg5_31dec18_RD1_01_518.12572.12572.3	22/88	MPLGISLPQVELTGFREATPGQQAE	E1BM58	2408.27
0.999999	1	10ul_Azm_Preg5_31dec18_RD1_01_518.12573.12573.3	15/56	FPSDASANSSLLLEFQD	Q3T0A6	1577.76
0.999999	1	10ul_Azm_Preg5_31dec18_RD1_01_518.12704.12704.3	23/80	TGVPATPQGPKSPLWAAGLARRV	P03972	2129.19
0.999999	1	10ul_Azm_Preg5_31dec18_RD1_01_518.12799.12799.3	18/64	TAALLFMIGALVPFNVILD	L8I311	1801.06
0.999999	1	10ul_Azm_Preg5_31dec18_RD1_01_518.12819.12819.3	20/76	PVSPEKDATFPTPVALCIPHSP	G3MYZ8	2165.08
0.999999	1	10ul_Azm_Preg5_31dec18_RD1_01_518.12979.12979.3	1948-12-01	SLAKIGFHLSHKVTS	F1MU00	1449.85
0.999999	1	10ul_Azm_Preg5_31dec18_RD1_01_518.13018.13018.3	18/72	RSYLEGSLLATGALMGADELA	L8IYW6	1909.93
0.999999	1	10ul_Azm_Preg5_31dec18_RD1_01_518.13041.13041.3	17/60	SLSFCRSNVIDHFFCDAT	F1MT57	1986.87
0.999999	1	10ul_Azm_Preg5_31dec18_RD1_01_518.13076.13076.3	15/36	VLMVLSLILCCL	Q58DR6	1236.63
0.999999	1	10ul_Azm_Preg5_31dec18_RD1_01_518.13140.13140.3	15/44	DVFLPCEDPPPTPQ	G3N0X5	1367.64
0.999999	1	10ul_Azm_Preg5_31dec18_RD1_01_518.13149.13149.3	1940-11-01	ETPKSCTKSSKNS	F1MJ58	1236.61
0.999999	1	10ul_Azm_Preg6_31dec18_RD1_01_520.00474.00474.3	16/44	KRSQDPTPEPRDAA	F1MLL2	1367.64
0.999999	1	10ul_Azm_Preg6_31dec18_RD1_01_520.00485.00485.3	1960-12-01	KGEILGLLGPNGAGKSTL	E1BKP0	1482.8
0.999999	1	10ul_Azm_Preg6_31dec18_RD1_01_520.02406.02406.3	13/48	HRGYPMRAYKLATLA	F1N0J8	1538.84
0.999999	1	10ul_Azm_Preg6_31dec18_RD1_01_520.02460.02460.3	14/72	LTAEGDLNIIMALAEKIKPGL	A6QR41	1983.07
0.999999	1	10ul_Azm_Preg6_31dec18_RD1_01_520.02481.02481.3	18/80	GPPGLDGFHGLPGPPGDGIKGPR	F1N7Q7	1981.01
0.999999	1	10ul_Azm_Preg6_31dec18_RD1_01_520.02546.02546.3	1956-10-01	GHRANLACSPLGGGEPS	F1MSK1	1534.73
0.999999	1	10ul_Azm_Preg6_31dec18_RD1_01_520.02622.02622.3	13/52	CSVRSAATILASVREQ	E1BPV1	1458.82
0.999999	1	10ul_Azm_Preg6_31dec18_RD1_01_520.02694.02694.3	18/72	RLLNTTDVYVLPSLNPDGFER	E1BLR9	2106.05
0.999999	1	10ul_Azm_Preg6_31dec18_RD1_01_520.02723.02723.3	15/68	PVTPAFYVSLWDALNFLELP	F1MY73	2097.08
0.999999	1	10ul_Azm_Preg6_31dec18_RD1_01_520.02738.02738.3	24/88	PPELEPGLFDPQPAMVGSLLYPEPW	A7MB34	2495.23
0.999999	1	10ul_Azm_Preg6_31dec18_RD1_01_520.02770.02770.3	21/80	QDPDVHFKYIQAACKTGQIKEVE	P49951	2446.23
0.999999	1	10ul_Azm_Preg6_31dec18_RD1_01_520.02874.02874.3	24/80	KPPGGLEVVSGLEELLGEDTIDQ	E1BHP3	2138.06
0.999999	1	10ul_Azm_Preg6_31dec18_RD1_01_520.02875.02875.3	16/92	VYGASYHSMSSMARAAFSEDGALVDG	Q3SZZ5	2538.08
0.999999	1	10ul_Azm_Preg6_31dec18_RD1_01_520.02890.02890.3	19/84	DIKGEKGDEGPMGLKGYLGLKGLP	F1N7Q7	2259.23
0.999999	1	10ul_Azm_Preg6_31dec18_RD1_01_520.02982.02982.3	19/80	YDAYDAQVFRLPGPSRAQRLSTC	F1MN63	2347.2
0.999999	1	10ul_Azm_Preg6_31dec18_RD1_01_520.03024.03024.3	18/52	GYLRVGDMGGFAIWCR	Q3T0N1	1659.75
0.999999	1	10ul_Azm_Preg6_31dec18_RD1_01_520.03216.03216.3	23/92	TSDSGKLNQKPPSSEELEGENPGKEF	P10894	2555.2
0.999999	1	10ul_Azm_Preg6_31dec18_RD1_01_520.03217.03217.3	15/112	QTEEPAQDCLNWGGMDSKSGMDSSSDDNSRD	E1BK65	3207.23
0.999999	1	10ul_Azm_Preg6_31dec18_RD1_01_520.03246.03246.3	26/112	AASPGHNGTSSLTGSPAPSPAASPGHDGAST	B2MW77	2571.16
0.999999	1	10ul_Azm_Preg6_31dec18_RD1_01_520.03355.03355.3	18/80	YYATVNELTPVGTTIFTGFSGDN	G3MYD4	2189.05
0.999999	1	10ul_Azm_Preg6_31dec18_RD1_01_520.03380.03380.3	15/52	DLISANMENSLASIGG	Q3MHG1	1418.71
0.999999	1	10ul_Azm_Preg6_31dec18_RD1_01_520.03383.03383.3	1948-12-01	PLLGSGGFGSVYSGL	Q9N0P9	1199.58
0.999999	1	10ul_Azm_Preg6_31dec18_RD1_01_520.03432.03432.3	19/116	PAEAALAGGGLPPPSPSGHPDQAGTNQHFVMV	E1B914	2926.37
0.999999	1	10ul_Azm_Preg6_31dec18_RD1_01_520.03459.03459.3	20/112	LSGFTDSGYERISEVPELPEPRHTYEQIPGA	L8HX01	3289.55
0.999999	1	10ul_Azm_Preg6_31dec18_RD1_01_520.03503.03503.3	15/44	KPMEAPAAALPSRY	E1BFC1	1225.61
0.999999	1	10ul_Azm_Preg6_31dec18_RD1_01_520.03550.03550.3	17/56	NMAGKHAELGNHAEAAQ	E1BK77	1505.7
0.999999	1	10ul_Azm_Preg6_31dec18_RD1_01_520.03638.03638.3	14/44	RDMVSKVQCYDPSE	L8HYM3	1427.61
0.999999	1	10ul_Azm_Preg6_31dec18_RD1_01_520.03647.03647.3	17/68	VDGCGFEAGTRVAGMGPSGV	G3X6N5	1740.72
0.999999	1	10ul_Azm_Preg6_31dec18_RD1_01_520.03651.03651.3	18/68	DQREKASIMYSQSIDTVVEF	L8IZ51	2083.03
0.999999	1	10ul_Azm_Preg6_31dec18_RD1_01_520.03664.03664.3	17/96	VDMLMEDKVKSDSGPQGHHRPGPVHSG	A2VDL5	2756.28
0.999999	1	10ul_Azm_Preg6_31dec18_RD1_01_520.03731.03731.3	16/84	LLAVMAYDRFVAVCKPLHYMVIMN	E1BNP4	2642.32
0.999999	1	10ul_Azm_Preg6_31dec18_RD1_01_520.03753.03753.3	19/72	SSPAPAPKKESSPKSHESVSS	F1MF37	1948.99
0.999999	1	10ul_Azm_Preg6_31dec18_RD1_01_520.03774.03774.3	18/84	RFDHILFTGSTGVGRVVMMAAAKH	L8J548	2307.19
0.999999	1	10ul_Azm_Preg6_31dec18_RD1_01_520.03804.03804.3	21/64	SGSHTRERVAGGSTIPQEL	F1MJN1	1780.88
0.999999	1	10ul_Azm_Preg6_31dec18_RD1_01_520.03816.03816.3	20/68	VTVLPVPAPGPVQGQNYSVW	F1MDT8	1821.96
0.999999	1	10ul_Azm_Preg6_31dec18_RD1_01_520.03861.03861.3	20/56	QQARKVPGVTAIELDED	Q2TBT7	1624.88
0.999999	1	10ul_Azm_Preg6_31dec18_RD1_01_520.03875.03875.3	19/100	EDVPALPPPCEEPPGTLLQRKGWPARQR	A6H752	2908.5
0.999999	1	10ul_Azm_Preg6_31dec18_RD1_01_520.03877.03877.3	18/104	RVAPRFSILPMSHEIMPGGNVNITCVAVG	E1BIU8	2908.48
0.999999	1	10ul_Azm_Preg6_31dec18_RD1_01_520.03900.03900.3	16/60	PRTLMCHDMMGGYLDDKF	E1BE05	1957.82
0.999999	1	10ul_Azm_Preg6_31dec18_RD1_01_520.03930.03930.3	15/56	VYMHIRVLVAAYLFQTG	F1MBE8	1823.98
0.999999	1	10ul_Azm_Preg6_31dec18_RD1_01_520.03936.03936.3	23/100	LLMDDMGWGDLGVYGEPSRETPNLDRMA	F1MU84	2969.3
0.999999	1	10ul_Azm_Preg6_31dec18_RD1_01_520.04017.04017.3	16/60	LAEQPQDEWTTREFQLHH	G3N084	2013.92
0.999999	1	10ul_Azm_Preg6_31dec18_RD1_01_520.04028.04028.3	21/100	LHVQLADKDLYVAEALSTLESWRSRYNQ	Q2T9U2	3063.54
0.999999	1	10ul_Azm_Preg6_31dec18_RD1_01_520.04122.04122.3	19/88	SYYGTMDTVSLSGTVPVQMLLEIGL	A6QM04	2489.21
0.999999	1	10ul_Azm_Preg6_31dec18_RD1_01_520.04140.04140.3	16/84	FNPFESGDSGNLIAYGGNNFVFVG	L8IFN4	2317.07
0.999999	1	10ul_Azm_Preg6_31dec18_RD1_01_520.04160.04160.3	20/112	LMELINNVAKAHGGYSVFAGVGERTREGNDL	P00829	3106.49
0.999999	1	10ul_Azm_Preg6_31dec18_RD1_01_520.04228.04228.3	23/120	FPGAKGEIGMMGPPGPPGPLGIPGRSGVPGLKG	L8HMU8	2909.53
0.999999	1	10ul_Azm_Preg6_31dec18_RD1_01_520.04236.04236.3	19/56	LNMSSSPGSSGMHTSWN	G3N1K6	1567.6
0.999999	1	10ul_Azm_Preg6_31dec18_RD1_01_520.04289.04289.3	17/56	SQPTCIKSCERPVLVNA	L8IGM1	1799.9
0.999999	1	10ul_Azm_Preg6_31dec18_RD1_01_520.04522.04522.3	24/92	HTATPATVSRAGILYINPADLGWNPP	Q5H9M6	2497.3
0.999999	1	10ul_Azm_Preg6_31dec18_RD1_01_520.04530.04530.3	22/112	GAQCQAAGGLGSGAAHALRTHGYCAAYETLY	E1BLE3	2961.36
0.999999	1	10ul_Azm_Preg6_31dec18_RD1_01_520.04548.04548.3	19/72	APQLPRGLGGIGMGLGPGGQP	A6QQP0	1760.94
0.999999	1	10ul_Azm_Preg6_31dec18_RD1_01_520.04565.04565.3	19/64	LHPPGSGSQAAAVSVQTTP	L8HRU8	1593.77
0.999999	1	10ul_Azm_Preg6_31dec18_RD1_01_520.04567.04567.3	19/48	MKGFHFADSKQNVPS	E1BGB2	1473.74
0.999999	1	10ul_Azm_Preg6_31dec18_RD1_01_520.04574.04574.3	18/80	RLLCESGRSSMVWVSASPCPHCG	G3MXF9	2435.05
0.999999	1	10ul_Azm_Preg6_31dec18_RD1_01_520.04581.04581.3	1944-12-01	GCPRVPGAVASPQS	L8IRP3	1237.62
0.999999	1	10ul_Azm_Preg6_31dec18_RD1_01_520.04648.04648.3	21/120	EEEEMMDEGKNFNSEIEDLEKEGNMPLEDLLAF	F1ML55	3645.55
0.999999	1	10ul_Azm_Preg6_31dec18_RD1_01_520.04660.04660.3	24/116	PLGGGGGIGYEANPGVPPATMSGSMMGSDMRT	E1BQ37	2869.25
0.999999	1	10ul_Azm_Preg6_31dec18_RD1_01_520.04698.04698.3	13/48	RSGSRLSLCPSAASL	F1MRE3	1291.62
0.999999	1	10ul_Azm_Preg6_31dec18_RD1_01_520.04732.04732.3	20/96	LLSRMEPIPPNALVKPNANDAQVLMWR	G3N3M0	2803.45
0.999999	1	10ul_Azm_Preg6_31dec18_RD1_01_520.04794.04794.3	26/96	NMALAGGPGPGGGGGGGGGGGGGGGTL	E1BNZ8	1741.74
0.999999	1	10ul_Azm_Preg6_31dec18_RD1_01_520.04811.04811.3	23/72	TSGSNTFTTTNPSSAGIAASS	E1BPV9	1769.81
0.999999	1	10ul_Azm_Preg6_31dec18_RD1_01_520.04834.04834.3	16/48	VMSQNLAYYTAMLGE	A4FUY3	1493.65
0.999999	1	10ul_Azm_Preg6_31dec18_RD1_01_520.04836.04836.3	24/68	SFQDTGMDHHALLKQFDHLN	Q0IIH5	2152.02
0.999999	1	10ul_Azm_Preg6_31dec18_RD1_01_520.04838.04838.3	18/52	TPMNATSAFGPNLRYL	L8HQQ4	1537.73
0.999999	1	10ul_Azm_Preg6_31dec18_RD1_01_520.04862.04862.3	23/68	EWGSAEGSSTSWASSPALES	G5E6N2	1808.79
0.999999	1	10ul_Azm_Preg6_31dec18_RD1_01_520.04885.04885.3	19/72	NRSLRFRLVSGQSVQSCFMQG	G1K177	2285.15
0.999999	1	10ul_Azm_Preg6_31dec18_RD1_01_520.04913.04913.3	20/100	VWLAVLHRVTIAEQVKHQTKCSICRQCP	L8I8Q9	3220.65
0.999999	1	10ul_Azm_Preg6_31dec18_RD1_01_520.04956.04956.3	20/80	SQTAVGSNTSLIVVPWTNGGPYT	Q58DU2	2160.09
0.999999	1	10ul_Azm_Preg6_31dec18_RD1_01_520.04963.04963.3	15/64	TIPRPEPPPPVVPVKHRTG	E1BKN0	1915.12
0.999999	1	10ul_Azm_Preg6_31dec18_RD1_01_520.04975.04975.3	23/100	QGPPAKKAAVPAKQASLLQHPGKAAVKA	Q0IIG0	2562.51
0.999999	1	10ul_Azm_Preg6_31dec18_RD1_01_520.05041.05041.3	23/96	DSPLGAAVTLAHELGHNFGMNHDTLER	L8I4W8	2646.25
0.999999	1	10ul_Azm_Preg6_31dec18_RD1_01_520.05080.05080.3	20/68	VQVQSGLTIAVHFEQPFQIL	L8IUH1	2041.06
0.999999	1	10ul_Azm_Preg6_31dec18_RD1_01_520.05094.05094.3	20/64	EDMKSWKIDSNGGDQWKVE	Q3SX24	2008.93
0.999999	1	10ul_Azm_Preg6_31dec18_RD1_01_520.05097.05097.3	18/56	YGFVYKGHERFITPWPW	F1MJA2	1832.94
0.999999	1	10ul_Azm_Preg6_31dec18_RD1_01_520.05142.05142.3	15/48	QLAAEAGRRLGGQVG	A5PK46	1296.73
0.999999	1	10ul_Azm_Preg6_31dec18_RD1_01_520.05144.05144.3	18/68	TYVNTIGHRASEQALQLGSL	F1MTT7	1942.99
0.999999	1	10ul_Azm_Preg6_31dec18_RD1_01_520.05158.05158.3	16/60	TGSNPTSASDDSNGLEWE	A2VDU6	1635.66
0.999999	1	10ul_Azm_Preg6_31dec18_RD1_01_520.05164.05164.3	14/44	EELNDDLLQSDNED	F1MTV4	1403.61
0.999999	1	10ul_Azm_Preg6_31dec18_RD1_01_520.05204.05204.3	15/44	CGGTESMSQAPYCV	Q3T0R7	1302.49
0.999999	1	10ul_Azm_Preg6_31dec18_RD1_01_520.05212.05212.3	17/80	QAGLPRPATGFQVTWAEVTTESR	G3MX10	2217.11
0.999999	1	10ul_Azm_Preg6_31dec18_RD1_01_520.05213.05213.3	17/56	LMMGTVVPKMAANFLSG	G3X8E5	1643.77
0.999999	1	10ul_Azm_Preg6_31dec18_RD1_01_520.05217.05217.3	17/60	HVLSVTQPLGSSEPALLL	G5E657	1609.89
0.999999	1	10ul_Azm_Preg6_31dec18_RD1_01_520.05243.05243.3	13/48	HHYPAPSPESGGGCG	A7E331	1314.53
0.999999	1	10ul_Azm_Preg6_31dec18_RD1_01_520.05285.05285.3	24/116	PAGPRGPPGSAGSPGKDGLNGLPGPIGPPGPR	P02453	2630.36
0.999999	1	10ul_Azm_Preg6_31dec18_RD1_01_520.05316.05316.3	16/52	RPWGDGVAADCCETTF	Q08DM6	1537.58
0.999999	1	10ul_Azm_Preg6_31dec18_RD1_01_520.05389.05389.3	21/60	EFSTREICSLDNGGCDQF	P00743	1857.76
0.999999	1	10ul_Azm_Preg6_31dec18_RD1_01_520.05405.05405.3	18/44	LHNSAGHLNGPART	E1BPS3	1229.6
0.999999	1	10ul_Azm_Preg6_31dec18_RD1_01_520.05460.05460.3	21/60	TVNILTMGYWPTYVPMEV	L8IS48	1912.91
0.999999	1	10ul_Azm_Preg6_31dec18_RD1_01_520.05495.05495.3	17/52	NDEVKVVTGKDGQTGT	F1MLB1	1431.72
0.999999	1	10ul_Azm_Preg6_31dec18_RD1_01_520.05608.05608.3	20/64	AAGAPGPQGPVGPVGKHGN	P02465	1481.77
0.999999	1	10ul_Azm_Preg6_31dec18_RD1_01_520.05618.05618.3	15/48	LFTNCIPFSLYLENG	F1N7C2	1616.75
0.999999	1	10ul_Azm_Preg6_31dec18_RD1_01_520.05831.05831.3	15/44	GCEHGCEALVDTGT	L8J0I2	1346.52
0.999999	1	10ul_Azm_Preg6_31dec18_RD1_01_520.05925.05925.3	19/60	QMAAGLPLSPRGLGDSGS	E1BB77	1513.76
0.999999	1	10ul_Azm_Preg6_31dec18_RD1_01_520.05936.05936.3	17/56	SRTDSDNMADGEGYRNP	A6QR52	1715.68
0.999999	1	10ul_Azm_Preg6_31dec18_RD1_01_520.06065.06065.3	1944-12-01	CTHESPLETRNIAF	L8HV65	1366.68
0.999999	1	10ul_Azm_Preg6_31dec18_RD1_01_520.06090.06090.3	21/60	PPAQAGALLLALPPASSR	E1BIC8	1475.83
0.999999	1	10ul_Azm_Preg6_31dec18_RD1_01_520.06092.06092.3	22/76	AVRRIQPLSTGTMTGLAIQFAL	E1BMV3	2159.19
0.999999	1	10ul_Azm_Preg6_31dec18_RD1_01_520.06107.06107.3	1940-11-01	LATEAYERRIKRL	L8INB9	1391.76
0.999999	1	10ul_Azm_Preg6_31dec18_RD1_01_520.06145.06145.3	20/56	QTQSLSTPRSALSHPGG	Q29RN1	1537.78
0.999999	1	10ul_Azm_Preg6_31dec18_RD1_01_520.06207.06207.1	2019-10-08	HPHLSFMA	P02668	730.347
0.999999	1	10ul_Azm_Preg6_31dec18_RD1_01_520.06274.06274.3	16/52	TRAIQVTIPPGPEVSV	E1B8L3	1462.81
0.999999	1	10ul_Azm_Preg6_31dec18_RD1_01_520.06296.06296.3	13/44	NVQQIDDGWMYGTV	Q3B7M5	1411.61
0.999999	1	10ul_Azm_Preg6_31dec18_RD1_01_520.06304.06304.3	17/48	LCPKACEGTGSGSRF	A6QR62	1365.58
0.999999	1	10ul_Azm_Preg6_31dec18_RD1_01_520.06309.06309.3	20/64	AEAGVAASASASSPTVSSL	G3MZR8	1477.69
0.999999	1	10ul_Azm_Preg6_31dec18_RD1_01_520.06389.06389.3	18/56	VGPAPGMRPPMGGHMPM	Q32PA0	1520.67
0.999999	1	10ul_Azm_Preg6_31dec18_RD1_01_520.06426.06426.3	21/56	YKLVMLGAGGVGKSAMT	G3MXR6	1417.78
0.999999	1	10ul_Azm_Preg6_31dec18_RD1_01_520.06582.06582.3	16/56	ESGVPLPSPMDLMYKIL	P10894	1646.84
0.999999	1	10ul_Azm_Preg6_31dec18_RD1_01_520.06623.06623.3	23/72	SRYAHWVVSQPPDTYLKPLMT	Q3SYU7	2300.18
0.999999	1	10ul_Azm_Preg6_31dec18_RD1_01_520.06637.06637.3	14/36	VVSENLWQFVES	A7MBJ0	1249.6
0.999999	1	10ul_Azm_Preg6_31dec18_RD1_01_520.06709.06709.3	29/124	PQPLRRAASGGSGSDSVGPPAAAVPGPLSRSTSV	E1BKM6	2989.53
0.999999	1	10ul_Azm_Preg6_31dec18_RD1_01_520.06743.06743.3	20/48	WACKRGTPPIFSWKG	E1BKZ8	1546.81
0.999999	1	10ul_Azm_Preg6_31dec18_RD1_01_520.06852.06852.3	16/44	DDYAESLGESRYME	F1MJU0	1435.59
0.999999	1	10ul_Azm_Preg6_31dec18_RD1_01_520.06881.06881.3	14/44	VSGWQTFLQALGYF	F1MWW1	1369.67
0.999999	1	10ul_Azm_Preg6_31dec18_RD1_01_520.06884.06884.3	20/48	DRLNLPSVLVLNSCG	F1MCE2	1483.82
0.999999	1	10ul_Azm_Preg6_31dec18_RD1_01_520.06899.06899.3	17/60	VRSAGMGKEGAGLKEECM	L8HXG9	1678.78
0.999999	1	10ul_Azm_Preg6_31dec18_RD1_01_520.06935.06935.3	16/40	SYSSCSKKKESGA	A4D7S3	1259.58
0.999999	1	10ul_Azm_Preg6_31dec18_RD1_01_520.07002.07002.3	16/68	SKKVLRDSRIHHLRLLNILG	L8I7Z6	2223.38
0.999999	1	10ul_Azm_Preg6_31dec18_RD1_01_520.07014.07014.3	16/52	TPHGVRTQTIHQWPST	F1N7J0	1642.83
0.999999	1	10ul_Azm_Preg6_31dec18_RD1_01_520.07122.07122.3	18/56	LSEVNASTLLLGVESQH	P62285	1545.79
0.999999	1	10ul_Azm_Preg6_31dec18_RD1_01_520.07149.07149.3	13/44	KAPIFVVTSNGMKW	F1MS89	1278.66
0.999999	1	10ul_Azm_Preg6_31dec18_RD1_01_520.07259.07259.3	14/52	RATAHAPQASGTQPQL	A6H758	1363.65
0.999999	1	10ul_Azm_Preg6_31dec18_RD1_01_520.07341.07341.3	26/84	MEQQPPRPPQPSQPPPPPPMSFRA	E1BB75	2491.24
0.999999	1	10ul_Azm_Preg6_31dec18_RD1_01_520.07391.07391.3	18/60	LREEEQEVCDKGHLVQRH	E1B9D8	2010.95
0.999999	1	10ul_Azm_Preg6_31dec18_RD1_01_520.07450.07450.3	16/52	VTMLTGNGGGWNTEQP	E1B7X9	1464.63
0.999999	1	10ul_Azm_Preg6_31dec18_RD1_01_520.07457.07457.3	17/52	SHSLRADSLMGEFKID	F1N3I4	1602.82
0.999999	1	10ul_Azm_Preg6_31dec18_RD1_01_520.07489.07489.3	15/60	VNMFDKLSRHRVIQPMGM	Q5E9J8	1927.99
0.999999	1	10ul_Azm_Preg6_31dec18_RD1_01_520.07576.07576.3	15/52	YASTFTALADNHISHN	L8I9A6	1483.71
0.999999	1	10ul_Azm_Preg6_31dec18_RD1_01_520.07652.07652.3	21/60	DRDSYLSGSLSSGSLSGS	F1MV20	1571.74
0.999999	1	10ul_Azm_Preg6_31dec18_RD1_01_520.07769.07769.3	20/92	PERSQGHRPGKGSPVGSSPLQGLENC	L8IWG4	2473.24
0.999999	1	10ul_Azm_Preg6_31dec18_RD1_01_520.07830.07830.3	14/52	TLFGESAGAASVGMHL	P23795	1332.61
0.999999	1	10ul_Azm_Preg6_31dec18_RD1_01_520.07910.07910.3	16/52	AATRAQPPAAHAGPGY	F1MB71	1300.66
0.999999	1	10ul_Azm_Preg6_31dec18_RD1_01_520.07937.07937.3	13/56	VIFAGGQDRYSTGSDSA	Q3SYT9	1559.69
0.999999	1	10ul_Azm_Preg6_31dec18_RD1_01_520.08056.08056.3	17/84	KRIAVVGEGREKFGAVFLWDSGSS	Q2KJH4	2379.23
0.999999	1	10ul_Azm_Preg6_31dec18_RD1_01_520.08149.08149.3	21/60	QCQSYGGVSSGGGSGCGG	Q17QL6	1475.54
0.999999	1	10ul_Azm_Preg6_31dec18_RD1_01_520.08283.08283.3	1944-12-01	GPRSPLDMASSRSS	G3N2Q3	1302.63
0.999999	1	10ul_Azm_Preg6_31dec18_RD1_01_520.08444.08444.3	15/48	LREPLSWQLSAEATV	G3MZW3	1486.74
0.999999	1	10ul_Azm_Preg6_31dec18_RD1_01_520.08454.08454.3	15/48	QDPKMATYQVVELRL	A6QLV1	1548.8
0.999999	1	10ul_Azm_Preg6_31dec18_RD1_01_520.08468.08468.3	18/64	ATAIMCDLCKPPPQESTKS	E1BAW5	1974.92
0.999999	1	10ul_Azm_Preg6_31dec18_RD1_01_520.08570.08570.3	1944-11-01	RPEESLAQDLLRLP	L8J0K3	1382.74
0.999999	1	10ul_Azm_Preg6_31dec18_RD1_01_520.08667.08667.3	1948-12-01	DCGETGVSVTAPDMS	L8HPF0	1338.54
0.999999	1	10ul_Azm_Preg6_31dec18_RD1_01_520.08704.08704.3	1948-11-01	VRSQIESLSQPVLTS	Q3SZI3	1456.79
0.999999	1	10ul_Azm_Preg6_31dec18_RD1_01_520.08715.08715.3	13/44	LPAELRGLRRYLDC	A6QL90	1457.81
0.999999	1	10ul_Azm_Preg6_31dec18_RD1_01_520.08886.08886.3	14/44	SADTEFSDESTTAE	F1MNU7	1272.5
0.999999	1	10ul_Azm_Preg6_31dec18_RD1_01_520.09266.09266.3	1940-11-01	RVLRETLLARPAA	L8IX67	1237.75
0.999999	1	10ul_Azm_Preg6_31dec18_RD1_01_520.09433.09433.3	17/68	EDDPLYTSYASMMAKSCQSG	F1MHA5	2069.84
0.999999	1	10ul_Azm_Preg6_31dec18_RD1_01_520.09572.09572.3	16/88	SHPPAPAPMATTGRGEGARNGAMEG	F1N0G2	2291.05
0.999999	1	10ul_Azm_Preg6_31dec18_RD1_01_520.09645.09645.3	18/64	AKMGDLVAAASAVTEAVKA	Q3SX04	1675.88
0.999999	1	10ul_Azm_Preg6_31dec18_RD1_01_520.09668.09668.3	22/92	QPAPSGGPDSSRGGTGRPIKTEQAAV	L8I9N5	2293.14
0.999999	1	10ul_Azm_Preg6_31dec18_RD1_01_520.09671.09671.3	13/52	LSGTPPFEVVWYKDKR	F1N757	1651.82
0.999999	1	10ul_Azm_Preg6_31dec18_RD1_01_520.09821.09821.3	18/72	VDKETETDTVKKAEMEETESE	F1MHM7	2214.97
0.999999	1	10ul_Azm_Preg6_31dec18_RD1_01_520.09829.09829.3	20/96	RPGQGLGDTPSSFLEPVASKASSGPSM	F1MG39	2372.15
0.999999	1	10ul_Azm_Preg6_31dec18_RD1_01_520.09934.09934.3	14/44	CRAKGSVVMFGGMD	G3MZ10	1238.63
0.999999	1	10ul_Azm_Preg6_31dec18_RD1_01_520.09989.09989.3	16/80	MLSSVMNKDGMLVAYGNGFITRE	Q9N129	2288.13
0.999999	1	10ul_Azm_Preg6_31dec18_RD1_01_520.10020.10020.3	17/104	FPGTFVGTAEPASPPLSSTSPTTTAATMP	Q08DK5	2576.23
0.999999	1	10ul_Azm_Preg6_31dec18_RD1_01_520.10080.10080.3	17/68	SQAKQLAELLQPPGPVMQLP	E1BD99	1976.08
0.999999	1	10ul_Azm_Preg6_31dec18_RD1_01_520.10133.10133.3	14/80	AEEVGLKGEKSEMLISEKVVDAR	P07995	2289.18
0.999999	1	10ul_Azm_Preg6_31dec18_RD1_01_520.10150.10150.3	20/76	KHTLLSLVRLTGDLIVWSDEMN	E1BHT5	2297.21
0.999999	1	10ul_Azm_Preg6_31dec18_RD1_01_520.10238.10238.3	14/44	RYTLLPYIYTLMHK	G3MY87	1542.78
0.999999	1	10ul_Azm_Preg6_31dec18_RD1_01_520.10275.10275.3	20/80	WLVPATPLASRSCDCSSQTQITG	F1N7Q0	2291.09
0.999999	1	10ul_Azm_Preg6_31dec18_RD1_01_520.10342.10342.3	15/52	RRMMMQSGRKGTDIMY	Q8SQH5	1656.76
0.999999	1	10ul_Azm_Preg6_31dec18_RD1_01_520.10350.10350.3	13/44	SEDAPSLLPATRAP	Q28062	1239.65
0.999999	1	10ul_Azm_Preg6_31dec18_RD1_01_520.10426.10426.3	26/76	NNQLALLAMKSEAGKRVTSHKK	L8HXZ5	2181.21
0.999999	1	10ul_Azm_Preg6_31dec18_RD1_01_520.10440.10440.3	16/72	YLKMFAASLLAMCAGAEVVHR	L8ICU7	2034.01
0.999999	1	10ul_Azm_Preg6_31dec18_RD1_01_520.10548.10548.3	17/52	DRWSDIPGSGKEKNYT	E1BGY0	1635.8
0.999999	1	10ul_Azm_Preg6_31dec18_RD1_01_520.10703.10703.3	15/52	RYDALEIFAGSGTSGQ	Q2HJB6	1386.63
0.999999	1	10ul_Azm_Preg6_31dec18_RD1_01_520.10706.10706.3	17/56	NHEMRVAMRRVCKQLVN	E1BMX6	1944
0.999999	1	10ul_Azm_Preg6_31dec18_RD1_01_520.10766.10766.3	16/60	ETIGPLINGMKKRPDTIG	F1MDR7	1768.99
0.999999	1	10ul_Azm_Preg6_31dec18_RD1_01_520.10834.10834.3	16/64	YFYAAIVAVVAVHVVLALF	A2VDK9	1754.05
0.999999	1	10ul_Azm_Preg6_31dec18_RD1_01_520.10868.10868.3	13/64	GGNTTGVNSASSKTDTGRG	L8I4S6	1651.78
0.999999	1	10ul_Azm_Preg6_31dec18_RD1_01_520.10918.10918.3	16/52	RALILKDSRGHCYTTF	M0QVZ3	1633.82
0.999999	1	10ul_Azm_Preg6_31dec18_RD1_01_520.11003.11003.3	19/72	LDVVKLTAQFVARNGRQFLTQ	A2VDN6	2162.2
0.999999	1	10ul_Azm_Preg6_31dec18_RD1_01_520.11030.11030.3	21/108	ELNPMNMCSEESERPAKRLKMGIAVPESFM	F1ML55	3220.55
0.999999	1	10ul_Azm_Preg6_31dec18_RD1_01_520.11084.11084.3	15/64	SGMGGHLATISTGAEQNFL	L8HVX7	1705.77
0.999999	1	10ul_Azm_Preg6_31dec18_RD1_01_520.11157.11157.3	23/76	DGTSEGKGAHHPKPSTSVTMET	G3N1L4	2052.95
0.999999	1	10ul_Azm_Preg6_31dec18_RD1_01_520.11237.11237.3	1944-12-01	TTGVSTDPEPYKED	L8IBV4	1321.6
0.999999	1	10ul_Azm_Preg6_31dec18_RD1_01_520.11251.11251.3	1948-10-01	DAVSIALVNSMTSLY	E1BHC0	1320.7
0.999999	1	10ul_Azm_Preg6_31dec18_RD1_01_520.11417.11417.3	15/56	GSPTGNEALSEIDVYRK	L8J4K9	1649.79
0.999999	1	10ul_Azm_Preg6_31dec18_RD1_01_520.11439.11439.3	14/60	VGSSLLVMNATDLDTGFN	L8IG16	1655.77
0.999999	1	10ul_Azm_Preg6_31dec18_RD1_01_520.11455.11455.3	24/92	PQEMQVSSSSGEAGGGGGSAPAEEAS	L8IZC2	2178.9
0.999999	1	10ul_Azm_Preg6_31dec18_RD1_01_520.11531.11531.3	22/80	MSAGGAPVPPPPNPAMSFPAPRV	A2VE13	2030
0.999999	1	10ul_Azm_Preg6_31dec18_RD1_01_520.11594.11594.3	17/72	PPYPAAHDLPQPLLQQPHAQE	F1N1Z3	2120.08
0.999999	1	10ul_Azm_Preg6_31dec18_RD1_01_520.11640.11640.3	14/56	PVGGGSAPGPLQPKQPV	A2VE44	1388.74
0.999999	1	10ul_Azm_Preg6_31dec18_RD1_01_520.11664.11664.3	16/52	LIHCLNGGGRSGMFCA	F1MME1	1564.67
0.999999	1	10ul_Azm_Preg6_31dec18_RD1_01_520.11719.11719.3	23/84	QDFDASLSGIGQELGAGAYSMSDV	A4FUY6	2189.94
0.999999	1	10ul_Azm_Preg6_31dec18_RD1_01_520.11772.11772.3	16/56	SPSPSPRAGSPAPGVER	A4IFA0	1404.7
0.999999	1	10ul_Azm_Preg6_31dec18_RD1_01_520.11818.11818.3	20/76	LPQDVVMSLSKCYSSLLDSMNA	L8I7S0	2289.03
0.999999	1	10ul_Azm_Preg6_31dec18_RD1_01_520.11919.11919.3	1940-12-01	LKQMWSGRDAHVA	A6QR55	1313.63
0.999999	1	10ul_Azm_Preg6_31dec18_RD1_01_520.11936.11936.3	18/80	TDSELKSLEPRPWSSTDSDGSVR	A0JNC2	2291.06
0.999999	1	10ul_Azm_Preg6_31dec18_RD1_01_520.11998.11998.3	26/88	VSTGTDHSGSSNSSSPPSSSVVLRF	F1N5B0	2232.03
0.999999	1	10ul_Azm_Preg6_31dec18_RD1_01_520.12042.12042.3	22/92	VVSTPVCPNGPGNCQVSLRDLFDRAV	P01239	2658.26
0.999999	1	10ul_Azm_Preg6_31dec18_RD1_01_520.12104.12104.3	19/52	KRRGRPPAEKLSPNPP	L8IA25	1573.88
0.999999	1	10ul_Azm_Preg6_31dec18_RD1_01_520.12170.12170.3	14/56	QSLEHGSVPEILIGLLY	G3N3K6	1575.89
0.999999	1	10ul_Azm_Preg6_31dec18_RD1_01_520.12203.12203.3	18/64	KYELLALTIRSHGTRLGRL	Q5E9H1	1955.11
0.999999	1	10ul_Azm_Preg6_31dec18_RD1_01_520.12288.12288.3	1944-12-01	DDQRASVGSLPGLR	G3N266	1198.63
0.999999	1	10ul_Azm_Preg6_31dec18_RD1_01_520.12343.12343.3	16/56	ARVVVDSDSLAFVKGAH	Q2TBG7	1561.85
0.999999	1	10ul_Azm_Preg6_31dec18_RD1_01_520.12348.12348.3	1960-11-01	RHVDLKWEPPKNDGGRPL	F1N757	1843.93
0.999999	1	10ul_Azm_Preg6_31dec18_RD1_01_520.12385.12385.3	14/52	KGWNLNQLQFPPSLHF	A5D788	1649.83
0.999999	1	10ul_Azm_Preg6_31dec18_RD1_01_520.12461.12461.3	19/60	ACSEDVDLPCTAPWDPLV	L8I3W3	1873.79
0.999999	1	10ul_Azm_Preg6_31dec18_RD1_01_520.12556.12556.3	19/92	GPLLGTVGKAPATVTNLLVGTPGYGA	E1B8E2	2295.28
0.999999	1	10ul_Azm_Preg6_31dec18_RD1_01_520.12657.12657.3	20/80	LEGTVIEMAVHAATVLLCGQSQV	E1BHN4	2213.08
0.999999	1	10ul_Azm_Preg6_31dec18_RD1_01_520.12706.12706.3	17/60	WHKMDTNTSLISPSFTCL	L8J0N8	1837.83
0.999999	1	10ul_Azm_Preg6_31dec18_RD1_01_520.12751.12751.3	1948-12-01	SRMQSLTLDVLGTSE	L8HYC4	1419.74
0.999999	1	10ul_Azm_Preg6_31dec18_RD1_01_520.12755.12755.3	19/60	LMESGVAIIPYLKAPDYE	L8IE09	1781.89
0.999999	1	10ul_Azm_Preg6_31dec18_RD1_01_520.12791.12791.3	18/60	AKMRQVICGAMETFCETV	F1MZK6	1975.86
0.999999	1	10ul_Azm_Preg6_31dec18_RD1_01_520.12836.12836.3	19/72	DLSGEPNVEGMDGQAEIIITK	L8IVR9	1971.95
0.999999	1	10ul_Azm_Preg6_31dec18_RD1_01_520.12966.12966.3	15/52	CVDNADEDGCESKINR	F1N6H1	1564.63
0.999999	1	10ul_Azm_Preg6_31dec18_RD1_01_520.12979.12979.3	19/60	GTDVVGGGPLGGCLTKGS	G3X782	1486.74
0.999999	1	10ul_Azm_Preg6_31dec18_RD1_01_520.13035.13035.3	19/76	LPEGVNKLKISPTTLKEAYVQK	G5E6N3	2214.23
0.999999	1	10ul_Azm_Preg6_31dec18_RD1_01_520.13107.13107.3	1940-12-01	TPEPGKWESSGYE	E1BK20	1235.55
0.999999	1	10ul_Azm_Preg7_3Jan18_RD1_01_554.00529.00529.3	15/56	FAIFNLVYWATYVNRES	P10064	1857.94
0.999999	1	10ul_Azm_Preg7_3Jan18_RD1_01_554.00542.00542.3	14/60	SDQSDDEKIQNSDDEERA	A4FUW5	1921.78
0.999999	1	10ul_Azm_Preg7_3Jan18_RD1_01_554.02290.02290.3	14/52	PVWCLKEKKASEIMEL	Q2KIW5	1765.87
0.999999	1	10ul_Azm_Preg7_3Jan18_RD1_01_554.02294.02294.3	19/60	NSGKVDISTKDLLPHQEL	F1N1K2	1765.92
0.999999	1	10ul_Azm_Preg7_3Jan18_RD1_01_554.02296.02296.3	18/76	AESPGGKTRSTGGSSTAGAPPP	F1N6S8	1800.86
0.999999	1	10ul_Azm_Preg7_3Jan18_RD1_01_554.02301.02301.3	24/72	EASPLTTAFLNGALDGALLGD	E1BH94	1800.96
0.999999	1	10ul_Azm_Preg7_3Jan18_RD1_01_554.02305.02305.3	21/64	GIAKVLADLGVTPDKITNS	F1MDC9	1767.01
0.999999	1	10ul_Azm_Preg7_3Jan18_RD1_01_554.02317.02317.3	20/76	GLGSLPGGDHAGGIPGSGTCVG	Q148H6	1807.85
0.999999	1	10ul_Azm_Preg7_3Jan18_RD1_01_554.02376.02376.3	21/76	FDAIACVVAGLPSVVSASQNAN	F1N7P3	1927.97
0.999999	1	10ul_Azm_Preg7_3Jan18_RD1_01_554.02445.02445.3	22/68	AYVKQKLDSKELGKYGLLYY	A2VE55	2144.19
0.999999	1	10ul_Azm_Preg7_3Jan18_RD1_01_554.02454.02454.3	19/68	EKHGLVIIPDGTPNGDVHQE	Q2T9W6	1895.99
0.999999	1	10ul_Azm_Preg7_3Jan18_RD1_01_554.02497.02497.3	16/64	LLNPKDVITTQFENSSPSK	F1MF92	1875.92
0.999999	1	10ul_Azm_Preg7_3Jan18_RD1_01_554.02513.02513.3	22/68	FKGKALADGKRLSDYSIGPN	E1BMX8	1875.02
0.999999	1	10ul_Azm_Preg7_3Jan18_RD1_01_554.02540.02540.3	16/72	EKNKKHSGSRSEDDRYQNGAE	F1MWG3	2176.04
0.999999	1	10ul_Azm_Preg7_3Jan18_RD1_01_554.02563.02563.3	18/64	LASEGSAAPGLSHLSPDNP	F1N2E3	1608.74
0.999999	1	10ul_Azm_Preg7_3Jan18_RD1_01_554.02571.02571.3	17/52	AEDVPRTSMCSVQSLR	Q29156	1607.73
0.999999	1	10ul_Azm_Preg7_3Jan18_RD1_01_554.02605.02605.3	22/56	QIGEKGAVKVLYVDDSE	A4FUY5	1591.85
0.999999	1	10ul_Azm_Preg7_3Jan18_RD1_01_554.02620.02620.3	15/72	PFVFYPIKPPKSVTLDSAPKP	F1MM35	2133.19
0.999999	1	10ul_Azm_Preg7_3Jan18_RD1_01_554.02632.02632.3	18/72	ATIAVKYTQSNSVCYAKNGQV	Q0VCK0	2131.04
0.999999	1	10ul_Azm_Preg7_3Jan18_RD1_01_554.02689.02689.3	24/72	VLGQAVIFLKSPEERDNIVAL	G5E5X3	2098.14
0.999999	1	10ul_Azm_Preg7_3Jan18_RD1_01_554.02692.02692.3	18/88	YQNEDYLTIMIAIVAGAMVVIVVIF	F1MMW5	2474.35
0.999999	1	10ul_Azm_Preg7_3Jan18_RD1_01_554.02700.02700.3	22/76	KAGYITPVPGGVGPMTVAMLMK	Q0P5C2	1976.98
0.999999	1	10ul_Azm_Preg7_3Jan18_RD1_01_554.02706.02706.3	1956-10-01	EIPKAKDLVASLSKGVL	Q32LF7	1524.92
0.999999	1	10ul_Azm_Preg7_3Jan18_RD1_01_554.02712.02712.3	21/92	QGPMQAAASAQYRGVLGTILTMVRTE	Q3SZI5	2491.3
0.999999	1	10ul_Azm_Preg7_3Jan18_RD1_01_554.02727.02727.3	18/80	PINQRACHILECCEGLAQSVIST	F1N5N3	2457.16
0.999999	1	10ul_Azm_Preg7_3Jan18_RD1_01_554.02729.02729.3	24/96	QGPRPHTLFVGGLPAGGHSPRLPVAIS	F1MC13	2502.4
0.999999	1	10ul_Azm_Preg7_3Jan18_RD1_01_554.02733.02733.3	21/76	RDEVTQEFTQYLAQREADFKET	E1BAT8	2446.13
0.999999	1	10ul_Azm_Preg7_3Jan18_RD1_01_554.02773.02773.3	15/64	PVGNESTAAGNTISMPTAS	F1N4I0	1635.74
0.999999	1	10ul_Azm_Preg7_3Jan18_RD1_01_554.02800.02800.3	23/76	-MTTSASISLSVSTSMNASAFT	M4MFL5	2007.91
0.999999	1	10ul_Azm_Preg7_3Jan18_RD1_01_554.02815.02815.3	21/80	KQQERKLCGDILLTAASISYLGF	Q5H9M6	2335.22
0.999999	1	10ul_Azm_Preg7_3Jan18_RD1_01_554.02898.02898.3	1940-12-01	STENQAVPSTHRV	U6JME6	1238.6
0.999999	1	10ul_Azm_Preg7_3Jan18_RD1_01_554.02907.02907.3	16/76	TYKEMSMKREGYSTEIHIQVGQ	A0A140T8C7	2401.14
0.999999	1	10ul_Azm_Preg7_3Jan18_RD1_01_554.02917.02917.3	17/80	DPDHRQQWIDAIEQHKTESGYGS	Q9GKI7	2494.16
0.999999	1	10ul_Azm_Preg7_3Jan18_RD1_01_554.02966.02966.3	27/76	QRTASVLWPWINRNARVADLVR	Q2LGB3	2336.29
0.999999	1	10ul_Azm_Preg7_3Jan18_RD1_01_554.02980.02980.3	22/108	GGGAYFMISRTLGPEVGGSIGLMFYLANVC	E1BLP2	2919.47
0.999999	1	10ul_Azm_Preg7_3Jan18_RD1_01_554.03021.03021.3	20/88	GLGVAPQSMEPSVLSQKGSSEATWG	F1MYV1	2404.16
0.999999	1	10ul_Azm_Preg7_3Jan18_RD1_01_554.03079.03079.3	1932-12-01	KIMSLYYQYME	L8II52	1226.54
0.999999	1	10ul_Azm_Preg7_3Jan18_RD1_01_554.03081.03081.3	19/52	KKHVPVPLFSRELKHF	Q2YDJ5	1685.97
0.999999	1	10ul_Azm_Preg7_3Jan18_RD1_01_554.03090.03090.3	21/56	LFFWLFMKETLYDEVLA	F1MLU7	1979.97
0.999999	1	10ul_Azm_Preg7_3Jan18_RD1_01_554.03099.03099.3	21/92	HDVGHNLGMHHDTETCQCGAPKCIMF	L8IS97	2767.14
0.999999	1	10ul_Azm_Preg7_3Jan18_RD1_01_554.03113.03113.3	21/80	PTTPAAIDRLFMDIGNINRESMA	F1N2F6	2380.15
0.999999	1	10ul_Azm_Preg7_3Jan18_RD1_01_554.03136.03136.3	22/92	VIDRSKPLFAEGPAEAAEAPGVAQGL	A4IFI5	2380.2
0.999999	1	10ul_Azm_Preg7_3Jan18_RD1_01_554.03204.03204.3	17/132	SLAMAANHGPPPGPYEAGGPGAFMHGAGAASSPVYV	F1N551	3222.47
0.999999	1	10ul_Azm_Preg7_3Jan18_RD1_01_554.03210.03210.3	22/92	YQKGFAQEMIFNITASSQTPETCLDL	F1MQ74	2731.25
0.999999	1	10ul_Azm_Preg7_3Jan18_RD1_01_554.03223.03223.3	18/104	AGSGFGLGGGAGFGGGFGGPGFPVCPPGG	F1MUY2	2323.05
0.999999	1	10ul_Azm_Preg7_3Jan18_RD1_01_554.03225.03225.3	19/104	GGPGGPDSFAVLGNSMPSVFTDPDLQEVL	E1BPF3	2748.26
0.999999	1	10ul_Azm_Preg7_3Jan18_RD1_01_554.03244.03244.3	21/88	FWEVISDEHGIDPTGSYHGDSDLQL	Q6B856	2556.1
0.999999	1	10ul_Azm_Preg7_3Jan18_RD1_01_554.03275.03275.3	25/108	SREFNLMYDGTKEVPMNPVKIYQVCDIPQP	Q08DD6	3415.62
0.999999	1	10ul_Azm_Preg7_3Jan18_RD1_01_554.03345.03345.3	29/100	DLASGTGPVLFWGGATKQAGLRLARVAR	E1BB73	2596.46
0.999999	1	10ul_Azm_Preg7_3Jan18_RD1_01_554.03377.03377.3	1944-11-01	LSGKRTALWASSAL	A6H773	1233.65
0.999999	1	10ul_Azm_Preg7_3Jan18_RD1_01_554.03378.03378.3	16/72	FDRFGSIRTIDHVKGDSFAYL	Q0V8I6	2183.08
0.999999	1	10ul_Azm_Preg7_3Jan18_RD1_01_554.03455.03455.3	24/88	GLLSSPAPRGGQEPQPSGGCPRPHR	F1MR37	2381.17
0.999999	1	10ul_Azm_Preg7_3Jan18_RD1_01_554.03485.03485.3	21/92	SLNYLPNLLLGMEAAGSAGGVVEAAL	Q29RK2	2345.19
0.999999	1	10ul_Azm_Preg7_3Jan18_RD1_01_554.03515.03515.3	23/72	ELYLLDDPLSAVDAHVGKHIF	E1B7A9	2075.11
0.999999	1	10ul_Azm_Preg7_3Jan18_RD1_01_554.03516.03516.3	25/108	KRKRKRVSEGNSVSSSSSSSSSSSSSNPES	L8IPH6	2886.37
0.999999	1	10ul_Azm_Preg7_3Jan18_RD1_01_554.03538.03538.3	22/56	FSFLDILRLWEVMWTEL	F1N090	1952.97
0.999999	1	10ul_Azm_Preg7_3Jan18_RD1_01_554.03590.03590.3	20/72	TAQRVEEPPEASNESDAEPEP	Q0VC16	2082.9
0.999999	1	10ul_Azm_Preg7_3Jan18_RD1_01_554.03591.03591.3	25/104	CQVPAFGLGDINLLQNLLFGSLISAVDPV	E1BBL2	2810.52
0.999999	1	10ul_Azm_Preg7_3Jan18_RD1_01_554.03594.03594.3	21/84	LSLGKHGRLSQQELTWKMKVQDCA	Q27ID4	2628.33
0.999999	1	10ul_Azm_Preg7_3Jan18_RD1_01_554.03626.03626.3	20/92	PHVPNQPSEAAAHFYFELAKTVLIKA	A7E305	2709.43
0.999999	1	10ul_Azm_Preg7_3Jan18_RD1_01_554.03627.03627.3	22/100	GTTHLVVTEPTRITLAPSNMDVSVGESV	E1B7U4	2753.39
0.999999	1	10ul_Azm_Preg7_3Jan18_RD1_01_554.03651.03651.3	17/80	VLAATGLGFDLLEAGKCQLLPPE	L8J0A3	2183.17
0.999999	1	10ul_Azm_Preg7_3Jan18_RD1_01_554.03718.03718.3	22/108	GFVGNGLVVWLLGSQGQRSPFSVYILHLGV	F1MFS7	3042.64
0.999999	1	10ul_Azm_Preg7_3Jan18_RD1_01_554.03729.03729.3	19/48	GPAVDKLLLSFLKQG	F1MMP9	1470.88
0.999999	1	10ul_Azm_Preg7_3Jan18_RD1_01_554.03742.03742.3	21/60	REALEEARALRAAHPTAH	J7ILU4	1704.89
0.999999	1	10ul_Azm_Preg7_3Jan18_RD1_01_554.03752.03752.3	19/48	KKLKMNKVSLESEYE	Q2NKS2	1583.82
0.999999	1	10ul_Azm_Preg7_3Jan18_RD1_01_554.03753.03753.3	19/80	ECSLSDNLCRNGKCVNMIGTYQC	F1MTZ4	2505.09
0.999999	1	10ul_Azm_Preg7_3Jan18_RD1_01_554.03756.03756.3	22/108	AASQFNVPMLYFMGDDDGQLEKLPEVSAKA	F1MYH5	3128.48
0.999999	1	10ul_Azm_Preg7_3Jan18_RD1_01_554.03762.03762.3	20/108	TVVGPALAAYRPEDTFGPDPTMIRANCLVQ	O18739	3045.51
0.999999	1	10ul_Azm_Preg7_3Jan18_RD1_01_554.03770.03770.3	19/56	PATASATSITTVQHAIL	E1BC37	1470.77
0.999999	1	10ul_Azm_Preg7_3Jan18_RD1_01_554.03783.03783.3	21/100	HRKASLPPGSTKEEQARMAWEHSRGEQ-	L8HKS9	2981.45
0.999999	1	10ul_Azm_Preg7_3Jan18_RD1_01_554.03798.03798.3	18/56	KKLLDDKPLVEDDTEEL	G3N1Q2	1757.86
0.999999	1	10ul_Azm_Preg7_3Jan18_RD1_01_554.03881.03881.3	1940-12-01	SSKKTTSPVSHRK	F1N729	1226.67
0.999999	1	10ul_Azm_Preg7_3Jan18_RD1_01_554.03963.03963.3	19/140	ALGTVCTVLCGALVSCLTGPTKRSALGPGLLWWDLMRQ	F1MT46	3958.05
0.999999	1	10ul_Azm_Preg7_3Jan18_RD1_01_554.04009.04009.3	18/68	ETQIVPKGVFTFSSRPRSAP	G3N3V8	1977.08
0.999999	1	10ul_Azm_Preg7_3Jan18_RD1_01_554.04033.04033.3	22/100	GAAPAAASGAPSGQPLAVAPGLGTSPLV	F1N0G2	2228.18
0.999999	1	10ul_Azm_Preg7_3Jan18_RD1_01_554.04037.04037.3	22/72	KSKQSPISTPTSPGSLRKHKV	E1BBU3	2035.12
0.999999	1	10ul_Azm_Preg7_3Jan18_RD1_01_554.04040.04040.3	25/104	LQVATGVISTLQIHRENMGRALSPDMLAT	Q3SZJ0	2907.51
0.999999	1	10ul_Azm_Preg7_3Jan18_RD1_01_554.04119.04119.3	21/84	LNKEPFRKNYNLITFDSLEPMQLL	A2VDQ0	2696.36
0.999999	1	10ul_Azm_Preg7_3Jan18_RD1_01_554.04126.04126.3	23/104	EEDIGAGDQGLMFGYATDETEECMPLTIV	A7E3T7	2978.25
0.999999	1	10ul_Azm_Preg7_3Jan18_RD1_01_554.04157.04157.3	17/60	EEAQCSTNPLSGSTLCVC	G3X812	1722.76
0.999999	1	10ul_Azm_Preg7_3Jan18_RD1_01_554.04162.04162.3	19/64	TTGHIRLMGPLGPPGGPAH	L8HUU1	1642.86
0.999999	1	10ul_Azm_Preg7_3Jan18_RD1_01_554.04174.04174.3	22/56	ESLVGATALSDRGEYRT	L8HS37	1593.81
0.999999	1	10ul_Azm_Preg7_3Jan18_RD1_01_554.04182.04182.3	16/44	VCWNRPDSDGGSEL	F1N757	1378.52
0.999999	1	10ul_Azm_Preg7_3Jan18_RD1_01_554.04197.04197.3	18/48	RGDQGGESSLSVSKW	E1BNR9	1249.58
0.999999	1	10ul_Azm_Preg7_3Jan18_RD1_01_554.04202.04202.3	21/84	SSYSYAEDGSGGSPCSLPLCEFSS	E1BIQ6	2368.95
0.999999	1	10ul_Azm_Preg7_3Jan18_RD1_01_554.04292.04292.3	19/52	TAWTLSTSSVSSQGSL	A4IFR5	1396.65
0.999999	1	10ul_Azm_Preg7_3Jan18_RD1_01_554.04357.04357.3	23/116	DRIEMWSYAAKVAPADGFSDLAMQVMTSPSKN	E1BDY3	3318.57
0.999999	1	10ul_Azm_Preg7_3Jan18_RD1_01_554.04388.04388.3	23/132	RLALLDDCLARRTPAALATAALLLQHSWSHRLRFER	F1MZA7	3885.09
0.999999	1	10ul_Azm_Preg7_3Jan18_RD1_01_554.04432.04432.3	23/68	SVQQGPPLGWLVGPFALPAD	F1MNM7	1846.01
0.999999	1	10ul_Azm_Preg7_3Jan18_RD1_01_554.04449.04449.3	21/68	VRGHNPLGLMYQDACRWGFT	F1MNI9	2177
0.999999	1	10ul_Azm_Preg7_3Jan18_RD1_01_554.04450.04450.3	14/40	QCRQMGLKQPTPV	F1N0P2	1330.65
0.999999	1	10ul_Azm_Preg7_3Jan18_RD1_01_554.04471.04471.3	24/88	TSSQAQEAAAEGPSTACAFPQASRA	A6QLI5	2321.03
0.999999	1	10ul_Azm_Preg7_3Jan18_RD1_01_554.04474.04474.3	22/80	GSDMKLLRVDIPQQPMGIIAVAN	E1BGJ0	2294.25
0.999999	1	10ul_Azm_Preg7_3Jan18_RD1_01_554.04476.04476.3	30/148	RSAPILDKPKGAAAGGGGGGGGGGSYAGGGGGGGGGNFGG	F6QPK8	2960.38
0.999999	1	10ul_Azm_Preg7_3Jan18_RD1_01_554.04522.04522.3	22/92	DCNPEQEPEPIADTADAVALSLCGGL	E1BLQ9	2513.11
0.999999	1	10ul_Azm_Preg7_3Jan18_RD1_01_554.04536.04536.3	20/56	EGLRPPASEDVQAHPPA	F1MJY3	1569.79
0.999999	1	10ul_Azm_Preg7_3Jan18_RD1_01_554.04540.04540.3	14/40	HLLQRSSCQLLKV	G3N0F0	1344.75
0.999999	1	10ul_Azm_Preg7_3Jan18_RD1_01_554.04572.04572.3	17/48	SRPLSTQSEPNGSAL	F1N6L1	1342.65
0.999999	1	10ul_Azm_Preg7_3Jan18_RD1_01_554.04578.04578.3	21/96	VKSSTLAGQEVLMNLLLALLLDIMTVA	Q08DF9	2701.5
0.999999	1	10ul_Azm_Preg7_3Jan18_RD1_01_554.04597.04597.3	17/48	LPKLVAIPKPTVPPT	E1BCF6	1355.85
0.999999	1	10ul_Azm_Preg7_3Jan18_RD1_01_554.04612.04612.3	21/128	VFIELPLSITGVAIPQQLFFSGVVRGESAMRSERD	E1BGA0	3649.93
0.999999	1	10ul_Azm_Preg7_3Jan18_RD1_01_554.04656.04656.3	18/64	GVSLGPGAAPDTDTLSLLS	Q0V8K7	1625.85
0.999999	1	10ul_Azm_Preg7_3Jan18_RD1_01_554.04668.04668.3	21/80	AMNIMNGSQMHINPANKSLPPTF	G3MZJ0	2310.09
0.999999	1	10ul_Azm_Preg7_3Jan18_RD1_01_554.04710.04710.3	28/128	GALGPGGLLGTGGMLAADGILAGQGGLLGGGGLLG	F1MQW0	2803.53
0.999999	1	10ul_Azm_Preg7_3Jan18_RD1_01_554.04714.04714.3	20/68	TPAPQLLGACSISLAAAVHK	A3KMW7	1774.94
0.999999	1	10ul_Azm_Preg7_3Jan18_RD1_01_554.04728.04728.3	18/56	WSKKHMGYRQAEFQILK	F1ML48	1834.95
0.999999	1	10ul_Azm_Preg7_3Jan18_RD1_01_554.04765.04765.3	19/60	KLCSLLVAGTYTWGGLCS	L8IFI3	1769.85
0.999999	1	10ul_Azm_Preg7_3Jan18_RD1_01_554.04813.04813.3	1952-11-01	ACMEKGVKVVAVNDPF	Q2KJE5	1560.76
0.999999	1	10ul_Azm_Preg7_3Jan18_RD1_01_554.04922.04922.3	22/88	ETYKKFGGAMDGTPPGLGAPLGAAY	F1MKX5	2176.1
0.999999	1	10ul_Azm_Preg7_3Jan18_RD1_01_554.04938.04938.3	22/88	VMAYDRFVAICHPLHYMVIMNLRLC	G3X855	2910.42
0.999999	1	10ul_Azm_Preg7_3Jan18_RD1_01_554.04978.04978.3	23/72	SVDRRPGGSNVPLGDKGLGKR	A6QLS4	1921.05
0.999999	1	10ul_Azm_Preg7_3Jan18_RD1_01_554.05045.05045.1	2020-11-01	LSAGCVEERVSLL	Q95126	1205.57
0.999999	1	10ul_Azm_Preg7_3Jan18_RD1_01_554.05082.05082.3	24/88	PPRPMADKDTSNESSSGSATQNTKE	P41986	2408.09
0.999999	1	10ul_Azm_Preg7_3Jan18_RD1_01_554.05105.05105.3	1940-09-01	GCGALQLVFSPNE	G5E630	1204.59
0.999999	1	10ul_Azm_Preg7_3Jan18_RD1_01_554.05149.05149.3	19/84	GSRPMSMYETGSGQKPYLPMGEVN	E1BI41	2444.12
0.999999	1	10ul_Azm_Preg7_3Jan18_RD1_01_554.05172.05172.3	19/44	KAVCAATSQLVSEL	F1N0W1	1234.59
0.999999	1	10ul_Azm_Preg7_3Jan18_RD1_01_554.05245.05245.3	24/188	DPEPPGPPDPPAGFGKGYGPTSSASSPAASSSSATTSFPLGSGTFKAQES	E1B8E2	4563.14
0.999999	1	10ul_Azm_Preg7_3Jan18_RD1_01_554.05290.05290.3	19/52	GSLMGCSIDMIVPVQF	Q9XSJ1	1548.73
0.999999	1	10ul_Azm_Preg7_3Jan18_RD1_01_554.05310.05310.3	22/64	VAPQGLQLLKSTEDSLLVS	E1BB79	1811
0.999999	1	10ul_Azm_Preg7_3Jan18_RD1_01_554.05365.05365.3	22/76	SLAVLGPLSPGAQAGDCKGQRQ	E1BPS6	1994.04
0.999999	1	10ul_Azm_Preg7_3Jan18_RD1_01_554.05376.05376.3	14/36	LKKAFSKENMQK	A5PJI6	1225.61
0.999999	1	10ul_Azm_Preg7_3Jan18_RD1_01_554.05446.05446.3	17/44	SRPSTPFTEASMMM	Q9XSB5	1369.6
0.999999	1	10ul_Azm_Preg7_3Jan18_RD1_01_554.05501.05501.3	23/76	GSVEWTADNVLDGASPVPQGPP	L8HT71	2037.96
0.999999	1	10ul_Azm_Preg7_3Jan18_RD1_01_554.05537.05537.3	20/44	YSMGMKSPKEPPSS	L8IXG1	1306.59
0.999999	1	10ul_Azm_Preg7_3Jan18_RD1_01_554.05542.05542.3	18/68	LLALGAASLALCCGAVALYA	G3N1Q6	1792.92
0.999999	1	10ul_Azm_Preg7_3Jan18_RD1_01_554.05571.05571.3	18/56	PAEAGGASRGWGDSGPG	G3MZU6	1373.6
0.999999	1	10ul_Azm_Preg7_3Jan18_RD1_01_554.05627.05627.3	14/52	PRDLRDAKHMSLKMAY	Q0P5E6	1670.87
0.999999	1	10ul_Azm_Preg7_3Jan18_RD1_01_554.05675.05675.3	15/52	SCGADGTMKMRILPDQ	E1BL55	1563.72
0.999999	1	10ul_Azm_Preg7_3Jan18_RD1_01_554.05708.05708.3	21/52	PTIVRAKAAGLDLLAN	L8HZT7	1410.86
0.999999	1	10ul_Azm_Preg7_3Jan18_RD1_01_554.05757.05757.3	14/68	LSSSALPSAVTSGLASLSSL	L8HSU4	1620.82
0.999999	1	10ul_Azm_Preg7_3Jan18_RD1_01_554.05764.05764.3	16/48	FRWPQCVPNNLKTLL	A5PK06	1624.85
0.999999	1	10ul_Azm_Preg7_3Jan18_RD1_01_554.05863.05863.3	21/104	NIVTGYGPTAGAAIAHHMDIGKVAFTGST	P52476	2641.33
0.999999	1	10ul_Azm_Preg7_3Jan18_RD1_01_554.05892.05892.3	18/52	YFCASMHGGRGPDTQY	A6H6X6	1535.62
0.999999	1	10ul_Azm_Preg7_3Jan18_RD1_01_554.05902.05902.3	17/48	HTGEKPYKCGACEKC	A4IFV3	1526.69
0.999999	1	10ul_Azm_Preg7_3Jan18_RD1_01_554.05910.05910.3	20/48	SLSLSDHRELGKMMN	L8IJT7	1547.74
0.999999	1	10ul_Azm_Preg7_3Jan18_RD1_01_554.05928.05928.3	20/56	PPPTQLSKIKYSGGPQL	L8IAN0	1599.86
0.999999	1	10ul_Azm_Preg7_3Jan18_RD1_01_554.05933.05933.3	18/44	GTTVHYVRRGLWEK	F1N303	1515.79
0.999999	1	10ul_Azm_Preg7_3Jan18_RD1_01_554.06070.06070.3	14/44	LRLSEFQQGMDWGH	F1MD14	1452.65
0.999999	1	10ul_Azm_Preg7_3Jan18_RD1_01_554.06089.06089.3	18/44	KCSLNMIPDLKAMN	F1N3I4	1423.65
0.999999	1	10ul_Azm_Preg7_3Jan18_RD1_01_554.06236.06236.3	21/60	KGDRGEPGPPGAPGRLVD	E1B7H2	1530.79
0.999999	1	10ul_Azm_Preg7_3Jan18_RD1_01_554.06318.06318.3	24/72	GGLSFLELGIIADAAVCSLEG	Q58DK4	1977.01
0.999999	1	10ul_Azm_Preg7_3Jan18_RD1_01_554.06329.06329.3	15/68	ASTCSSTGRMAGPPPAYSEA	E1BCJ0	1854.79
0.999999	1	10ul_Azm_Preg7_3Jan18_RD1_01_554.06425.06425.3	16/64	GKANCCLGPGWGTPPLPAF	E1BK92	1794.85
0.999999	1	10ul_Azm_Preg7_3Jan18_RD1_01_554.06437.06437.3	17/52	MPAEGPPTPASRSPSP	F1MDK3	1349.66
0.999999	1	10ul_Azm_Preg7_3Jan18_RD1_01_554.06477.06477.3	15/52	HSPVQADDPTKSHPGM	F1MQ79	1434.67
0.999999	1	10ul_Azm_Preg7_3Jan18_RD1_01_554.06489.06489.3	22/76	PGDGRMVQLSPPALAAPAAPGR	E1BAU0	1890.96
0.999999	1	10ul_Azm_Preg7_3Jan18_RD1_01_554.06492.06492.3	16/64	GLGVSSTALGFAGPFAVML	A6QL98	1623.83
0.999999	1	10ul_Azm_Preg7_3Jan18_RD1_01_554.06499.06499.3	17/44	NSNMANALANASCE	A4FV50	1238.5
0.999999	1	10ul_Azm_Preg7_3Jan18_RD1_01_554.06784.06784.3	16/56	DFISVPSIQPLDPISDS	F1MKX2	1626.85
0.999999	1	10ul_Azm_Preg7_3Jan18_RD1_01_554.06811.06811.3	17/44	GQYGSGSGQSSSCG	E1BIR8	1203.45
0.999999	1	10ul_Azm_Preg7_3Jan18_RD1_01_554.06838.06838.3	18/48	VNFDDYTVNLGGLKD	A8E645	1454.7
0.999999	1	10ul_Azm_Preg7_3Jan18_RD1_01_554.06886.06886.3	14/56	WINLRTAGTLGDAGTLD	Q05B87	1471.8
0.999999	1	10ul_Azm_Preg7_3Jan18_RD1_01_554.06912.06912.3	25/104	NVGNPGVNGAPGEAGRDGNPGNDGPPGRD	P02465	2484.15
0.999999	1	10ul_Azm_Preg7_3Jan18_RD1_01_554.06937.06937.3	14/52	EGEKLVRALFAVAREL	A2VDN5	1557.9
0.999999	1	10ul_Azm_Preg7_3Jan18_RD1_01_554.06946.06946.3	15/52	RSVIPVQASSDSFCSK	G7H7V7	1482.67
0.999999	1	10ul_Azm_Preg7_3Jan18_RD1_01_554.06974.06974.3	14/40	YCSTKDSKRHRMP	L8IIR5	1420.67
0.999999	1	10ul_Azm_Preg7_3Jan18_RD1_01_554.07036.07036.3	14/64	ASTGGGSSSGYGGPGPGLV	Q3Y598	1393.61
0.999999	1	10ul_Azm_Preg7_3Jan18_RD1_01_554.07094.07094.3	16/72	TSPQNPSSAPGLSLSSRARPQ	F1MTZ8	1907.98
0.999999	1	10ul_Azm_Preg7_3Jan18_RD1_01_554.07099.07099.3	14/48	PSAQPEGPDHDPGAV	L8J019	1276.53
0.999999	1	10ul_Azm_Preg7_3Jan18_RD1_01_554.07113.07113.3	20/52	QAEKGGGQRRGRPHTD	G3N2D0	1505.79
0.999999	1	10ul_Azm_Preg7_3Jan18_RD1_01_554.07305.07305.3	24/56	EGKFVELGLSNYAAWEV	F1N6I4	1682.83
0.999999	1	10ul_Azm_Preg7_3Jan18_RD1_01_554.07493.07493.3	20/56	ETESDASSDSEDVSALV	Q3T139	1511.61
0.999999	1	10ul_Azm_Preg7_3Jan18_RD1_01_554.07497.07497.3	17/44	SSFGPRWVGGEGSL	G5E649	1234.57
0.999999	1	10ul_Azm_Preg7_3Jan18_RD1_01_554.07517.07517.3	17/72	VKAGTGRRFLGGLLDHTSYCY	L8IKL5	2108.06
0.999999	1	10ul_Azm_Preg7_3Jan18_RD1_01_554.07546.07546.3	21/64	GGNGAAGGGGPPATEGAGP	A5D7H2	1296.57
0.999999	1	10ul_Azm_Preg7_3Jan18_RD1_01_554.07622.07622.3	1964-12-01	APGIPGQPGLPGAPGSPGA	L8IVG2	1454.75
0.999999	1	10ul_Azm_Preg7_3Jan18_RD1_01_554.07792.07792.3	18/64	CLLDADVLREMQEGHGGWN	L8IXI8	1924.91
0.999999	1	10ul_Azm_Preg7_3Jan18_RD1_01_554.07800.07800.3	19/64	EQGGSGLGSGSSGGGGSTS	F1MH24	1308.55
0.999999	1	10ul_Azm_Preg7_3Jan18_RD1_01_554.07891.07891.3	15/40	WRYTQAHSTIVSE	F1MXY3	1261.64
0.999999	1	10ul_Azm_Preg7_3Jan18_RD1_01_554.07896.07896.3	16/44	LRLPASLFVVGHIN	E1BAK4	1307.77
0.999999	1	10ul_Azm_Preg7_3Jan18_RD1_01_554.07984.07984.3	14/56	EGSLRLRADDGDSLTSE	Q1JPG0	1561.77
0.999999	1	10ul_Azm_Preg7_3Jan18_RD1_01_554.07989.07989.3	19/48	VKLEDLIVKDGLTDV	Q29RZ0	1457.8
0.999999	1	10ul_Azm_Preg7_3Jan18_RD1_01_554.08036.08036.3	14/52	PPARGPPALEGAPPPL	F1MUC3	1325.71
0.999999	1	10ul_Azm_Preg7_3Jan18_RD1_01_554.08055.08055.3	13/40	LCAVDQSVLLMRP	K4JDT2	1306.64
0.999999	1	10ul_Azm_Preg7_3Jan18_RD1_01_554.08254.08254.3	13/48	LSHNPISTVPRGSFR	F1N3H2	1397.71
0.999999	1	10ul_Azm_Preg7_3Jan18_RD1_01_554.08258.08258.3	1944-11-01	RMAVSHMKSLRGTG	Q9BE97	1332.66
0.999999	1	10ul_Azm_Preg7_3Jan18_RD1_01_554.08293.08293.3	16/44	LEPPEIDLDASMRK	F1N757	1387.63
0.999999	1	10ul_Azm_Preg7_3Jan18_RD1_01_554.08439.08439.3	15/64	AHVTHHPISVREVTLRCWA	K7QE75	2126.1
0.999999	1	10ul_Azm_Preg7_3Jan18_RD1_01_554.08573.08573.3	20/64	LKKLDLVAIPDFEAGAMEN	F1N1Q8	1861.95
0.999999	1	10ul_Azm_Preg7_3Jan18_RD1_01_554.08587.08587.3	13/40	AQSKHLTKLISKR	E1BM39	1281.78
0.999999	1	10ul_Azm_Preg7_3Jan18_RD1_01_554.08674.08674.3	15/44	KSTKAPKRKLQANG	Q0IIG0	1340.79
0.999999	1	10ul_Azm_Preg7_3Jan18_RD1_01_554.08685.08685.3	18/48	QAVLSDAGIYTCVAT	E1BE11	1338.65
0.999999	1	10ul_Azm_Preg7_3Jan18_RD1_01_554.08726.08726.3	19/64	-GHGKTPKDAASVRATHPL	F1MUS0	1728.9
0.999999	1	10ul_Azm_Preg7_3Jan18_RD1_01_554.08812.08812.3	17/56	AILAQGGDAFKHLCHQR	E1BMY4	1693.84
0.999999	1	10ul_Azm_Preg7_3Jan18_RD1_01_554.08976.08976.3	1936-08-01	PQKRGRGRPRKQ	L8HP04	1237.76
0.999999	1	10ul_Azm_Preg7_3Jan18_RD1_01_554.09104.09104.3	16/44	EQYGKIDIEIMTDR	E1BK61	1424.69
0.999999	1	10ul_Azm_Preg7_3Jan18_RD1_01_554.09187.09187.3	19/80	AVSSGGLALKHPGRVGQAALYGC	Q0VD17	2037.11
0.999999	1	10ul_Azm_Preg7_3Jan18_RD1_01_554.09213.09213.3	21/76	LAVDPSSCTSGGSLLGDKTRMT	A6QQI8	2037.95
0.999999	1	10ul_Azm_Preg7_3Jan18_RD1_01_554.09266.09266.3	18/72	QQPPPPSGPQPPQPQPGPLRS	F1MJX0	1971.03
0.999999	1	10ul_Azm_Preg7_3Jan18_RD1_01_554.09300.09300.3	15/44	PRTGVGAAVIDNYL	A6H7G1	1234.63
0.999999	1	10ul_Azm_Preg7_3Jan18_RD1_01_554.09334.09334.3	14/60	TSAFLPALSEVGSHGAAR	E1BMF6	1512.76
0.999999	1	10ul_Azm_Preg7_3Jan18_RD1_01_554.09344.09344.3	13/60	YGGAGGGGFGGLGIGFGG	L8IBR8	1236.59
0.999999	1	10ul_Azm_Preg7_3Jan18_RD1_01_554.09443.09443.3	20/64	WGPIPWLLMSEIFPLHVKG	P58354	1992.09
0.999999	1	10ul_Azm_Preg7_3Jan18_RD1_01_554.09531.09531.3	1944-09-01	KGLNKSATLVHLSL	E1BK91	1238.7
0.999999	1	10ul_Azm_Preg7_3Jan18_RD1_01_554.09576.09576.3	13/48	RQYILWLKLLSLISF	F1MQI0	1588.96
0.999999	1	10ul_Azm_Preg7_3Jan18_RD1_01_554.09645.09645.3	16/48	SCVSLGCNAEHRQLD	F1N3B1	1542.7
0.999999	1	10ul_Azm_Preg7_3Jan18_RD1_01_554.09649.09649.3	15/68	TVGMECTRLGGDLETKRHAC	G3MYT0	2028.98
0.999999	1	10ul_Azm_Preg7_3Jan18_RD1_01_554.09657.09657.3	14/48	PIDREIEFQPSRGPY	F1MSC3	1542.78
0.999999	1	10ul_Azm_Preg7_3Jan18_RD1_01_554.09725.09725.3	19/72	PKLPKNPRIEDSDGATSQSSL	L8J003	2029.01
0.999999	1	10ul_Azm_Preg7_3Jan18_RD1_01_554.09939.09939.3	23/84	SADRILPKSNPQGPPLNYVLLLIA	L8I6W1	2430.4
0.999999	1	10ul_Azm_Preg7_3Jan18_RD1_01_554.09956.09956.3	23/72	YHEGDCGAVIEASGTVTQAYR	L8I973	1963.86
0.999999	1	10ul_Azm_Preg7_3Jan18_RD1_01_554.10302.10302.3	1948-11-01	SRLLSRLLFLAQAVV	E1BIT3	1498.93
0.999999	1	10ul_Azm_Preg7_3Jan18_RD1_01_554.10321.10321.3	14/56	RVMDDHYSPDRDSHFLT	E1B7V2	1848.77
0.999999	1	10ul_Azm_Preg7_3Jan18_RD1_01_554.10375.10375.3	1952-12-01	TKRSTFDTFPQALLTV	E1B9S9	1623.86
0.999999	1	10ul_Azm_Preg7_3Jan18_RD1_01_554.10380.10380.3	20/88	AVTTPLDVAKTRIMLAKAGSSTASG	A6QR09	2333.26
0.999999	1	10ul_Azm_Preg7_3Jan18_RD1_01_554.10419.10419.3	18/68	TTGTSTGLGTGLGGLGFGGF	F1N741	1508.75
0.999999	1	10ul_Azm_Preg7_3Jan18_RD1_01_554.10482.10482.3	19/88	LLAHQRAQHGDGLGAAGGEEPAHIC	E1BGX5	2291.12
0.999999	1	10ul_Azm_Preg7_3Jan18_RD1_01_554.10536.10536.3	18/76	KMSKPGSPGPVIPVQPHGKILT	F1MFD2	2038.14
0.999999	1	10ul_Azm_Preg7_3Jan18_RD1_01_554.10610.10610.3	23/80	LTTAVKCFSEESCVSIPEVEGYV	Q0VCN6	2391.06
0.999999	1	10ul_Azm_Preg7_3Jan18_RD1_01_554.10675.10675.3	20/72	FAFYLSKDKWEGSVVMFGGVD	G3X6M5	2119.04
0.999999	1	10ul_Azm_Preg7_3Jan18_RD1_01_554.10741.10741.3	17/72	LGTMVFRRNYLSSGLHGLGRE	L8HVT3	2120.11
0.999999	1	10ul_Azm_Preg7_3Jan18_RD1_01_554.10833.10833.3	16/68	ATQMAPPGGPPAAPAGGRSH	A5D7U7	1634.78
0.999999	1	10ul_Azm_Preg7_3Jan18_RD1_01_554.10945.10945.3	19/56	RVLMSSKYADGVTGRVE	G3N3K3	1597.81
0.999999	1	10ul_Azm_Preg7_3Jan18_RD1_01_554.10971.10971.3	17/56	KQATTYGMADGDFVRML	A0JNI5	1693.71
0.999999	1	10ul_Azm_Preg7_3Jan18_RD1_01_554.10980.10980.3	21/64	ETPTKELGHGGGAARSPER	F1MRI6	1663.83
0.999999	1	10ul_Azm_Preg7_3Jan18_RD1_01_554.11014.11014.3	17/56	DDEESVDGNRPSSAASA	E1BQ15	1519.64
0.999999	1	10ul_Azm_Preg7_3Jan18_RD1_01_554.11128.11128.3	20/68	GGSSPGPSRSPHPDAGKLGD	Q08E64	1702.84
0.999999	1	10ul_Azm_Preg7_3Jan18_RD1_01_554.11189.11189.3	17/56	CQRAVSSSSIFSRSALS	F1MS85	1594.84
0.999999	1	10ul_Azm_Preg7_3Jan18_RD1_01_554.11204.11204.3	25/104	SSLHISPNSGSVASAPGSQMASGVSLGSF	F1MGL2	2500.19
0.999999	1	10ul_Azm_Preg7_3Jan18_RD1_01_554.11269.11269.3	18/84	GVDVVLDATPPPGALAVGTAVCTC	L8HUH3	2122.1
0.999999	1	10ul_Azm_Preg7_3Jan18_RD1_01_554.11314.11314.3	16/56	LLIFFSVVNVSVGLLGA	A4FUB8	1562.91
0.999999	1	10ul_Azm_Preg7_3Jan18_RD1_01_554.11351.11351.3	1944-12-01	QNPPFEPTSVDMMR	L8IIB0	1363.58
0.999999	1	10ul_Azm_Preg7_3Jan18_RD1_01_554.11371.11371.3	19/72	HEQLNEAAQGILTGPGDASAS	F1N6H4	1840.88
0.999999	1	10ul_Azm_Preg7_3Jan18_RD1_01_554.11495.11495.3	15/64	AARTVCYSPEGDMVAIGMK	F1N7B8	1855.83
0.999999	1	10ul_Azm_Preg7_3Jan18_RD1_01_554.11516.11516.3	14/68	SALTWLSPKVLVSGAEDGAL	L8I6W1	1812.96
0.999999	1	10ul_Azm_Preg7_3Jan18_RD1_01_554.11548.11548.3	13/52	QLLFVAAAFMGVAPLV	L8HKJ4	1418.8
0.999999	1	10ul_Azm_Preg7_3Jan18_RD1_01_554.11552.11552.3	13/72	VGAEHLVTLKDLYIKNSDGFV	L8I486	2119.09
0.999999	1	10ul_Azm_Preg7_3Jan18_RD1_01_554.11566.11566.3	20/64	VCGVRFTRNDKLKIHMRKH	L8IFF6	2174.17
0.999999	1	10ul_Azm_Preg7_3Jan18_RD1_01_554.11597.11597.3	20/76	NEVLSITAMLSVPQCFVRPTEA	A5D7D9	2276.15
0.999999	1	10ul_Azm_Preg7_3Jan18_RD1_01_554.11719.11719.3	24/88	TSQGSPAFQPPEIANGLDTFSGFKV	L8IYI6	2394.15
0.999999	1	10ul_Azm_Preg7_3Jan18_RD1_01_554.11744.11744.3	14/44	VVSLIPIILDLMKE	A6H758	1353.83
0.999999	1	10ul_Azm_Preg7_3Jan18_RD1_01_554.11784.11784.3	20/60	QKKVDLHRDFTVASPAEF	F1MSC3	1811.95
0.999999	1	10ul_Azm_Preg7_3Jan18_RD1_01_554.11799.11799.3	18/64	HLMGFSVLTAEDQETLKKQ	P18493	1908.99
0.999999	1	10ul_Azm_Preg7_3Jan18_RD1_01_554.11817.11817.3	20/56	MVTSGGYQKRTARIIAD	F1MWX4	1619.91
0.999999	1	10ul_Azm_Preg7_3Jan18_RD1_01_554.11844.11844.3	17/64	DKTQMTWIRPSRKTFQVSF	A6QQN1	2109.12
0.999999	1	10ul_Azm_Preg7_3Jan18_RD1_01_554.11860.11860.3	19/88	CKSDLSKAVMITRNQVSQFLPETFA	Q0VCA5	2638.38
0.999999	1	10ul_Azm_Preg7_3Jan18_RD1_01_554.12004.12004.3	18/72	EHQKILLDHLMKKAEEGDLLV	E1BPU0	2246.21
0.999999	1	10ul_Azm_Preg7_3Jan18_RD1_01_554.12032.12032.3	24/84	PFAMVGGCIWATGNIAVVPIIKTL	A6QQU6	2333.23
0.999999	1	10ul_Azm_Preg7_3Jan18_RD1_01_554.12131.12131.3	23/76	PSELGPPDPRLAMGSVGSGVAH	L8IQ37	1895.94
0.999999	1	10ul_Azm_Preg7_3Jan18_RD1_01_554.12136.12136.3	19/64	GEAVVKAEPGSIEELPCSA	G3MY07	1813.88
0.999999	1	10ul_Azm_Preg7_3Jan18_RD1_01_554.12139.12139.3	24/92	LGVVLQPWMGSAAMAASSVSVVLSSL	L8HS49	2333.18
0.999999	1	10ul_Azm_Preg7_3Jan18_RD1_01_554.12215.12215.3	15/56	AHRFVLAVGSAVFDAMF	L8IXY2	1618.83
0.999999	1	10ul_Azm_Preg7_3Jan18_RD1_01_554.12273.12273.3	17/52	PKNVFNVKETGLLYRM	L8HVP8	1679.94
0.999999	1	10ul_Azm_Preg7_3Jan18_RD1_01_554.12320.12320.3	17/76	DRNGQESMLTLGAIDPSYYTGS	P00794	2188.01
0.999999	1	10ul_Azm_Preg7_3Jan18_RD1_01_554.12348.12348.3	20/96	YVLPSEYYGPLKTLLLKSPDVQPISAS	L8J1E3	2727.51
0.999999	1	10ul_Azm_Preg7_3Jan18_RD1_01_554.12428.12428.3	22/88	NVTVDEIIGAYKQACQKLNCRQIPK	A7Z026	2703.38
0.999999	1	10ul_Azm_Preg7_3Jan18_RD1_01_554.12449.12449.3	23/76	AKCNDPNIIRREDCNGIFRINV	E1BK43	2503.22
0.999999	1	10ul_Azm_Preg7_3Jan18_RD1_01_554.12465.12465.3	20/88	GGNLRMPPASPPSGIPMISYIRMRL	F1ME27	2572.31
0.999999	1	10ul_Azm_Preg7_3Jan18_RD1_01_554.12473.12473.3	18/96	QTTVEGSMEGQSAGAASHAMIEKILSE	F6QHJ6	2504.19
0.999999	1	10ul_Azm_Preg7_3Jan18_RD1_01_554.12494.12494.3	21/88	LMGNRVKEANVWNLLRRFGVDVGRK	Q2KI70	2701.43
0.999999	1	10ul_Azm_Preg7_3Jan18_RD1_01_554.12591.12591.3	22/92	LDQILNSPDQGGCMGPSSRLQDGEYG	E1BNZ8	2639.12
0.999999	1	10ul_Azm_Preg7_3Jan18_RD1_01_554.12650.12650.3	15/60	DSLVVMAYAKFSGAPLKV	L8HPI4	1680.93
0.999999	1	10ul_Azm_Preg7_3Jan18_RD1_01_554.12699.12699.3	25/88	GPQSSVSPVPSSVSSGWGEMPNVHS	F1MLT5	2351.09
0.999999	1	10ul_Azm_Preg7_3Jan18_RD1_01_554.12713.12713.3	17/60	EQYSRTEGSARGIIFTKT	E1BJZ0	1812.95
0.999999	1	10ul_Azm_Preg7_3Jan18_RD1_01_554.12733.12733.3	21/80	TSTLTIRVLDVNDETPTFFPAVY	F1MXP9	2334.21
0.999999	1	10ul_Azm_Preg7_3Jan18_RD1_01_554.12805.12805.3	26/96	ARPGPGRAGSARRGLGERRPPTWEISD	G3N2T4	2715.45
0.999999	1	10ul_Azm_Preg7_3Jan18_RD1_01_554.12845.12845.3	22/84	CGVMLETFSLMASLGLTPSRTHAL	A6QPU7	2334.17
0.999999	1	10ul_Azm_Preg7_3Jan18_RD1_01_554.12856.12856.3	22/84	GTLHIQDARPGDSGTYTCVASNAG	F1N3H2	2333.07
0.999999	1	10ul_Azm_Preg7_3Jan18_RD1_01_554.12912.12912.3	19/72	MELTLQKYGSYEKFEQATGGS	F1N3A0	2148.04
0.999999	1	5ul_Azm_Preg1__30dec18_RD3_01_502.03333.03333.3	1976-10-01	EPPKANSPEVREVVGPLKGETG	F1MM51	2103.13
0.999999	1	5ul_Azm_Preg1__30dec18_RD3_01_502.03353.03353.3	1952-12-01	EPSSSSVFNQNDTWTP	G3MX04	1568.67
0.999999	1	5ul_Azm_Preg1__30dec18_RD3_01_502.03465.03465.3	1972-12-01	GQPGPKGDPGVSGIPGAPGLP	Q7SIB2	1699.89
0.999999	1	5ul_Azm_Preg1__30dec18_RD3_01_502.03514.03514.3	1960-09-01	FRSGRDRRRAADVFIASL	A6QL98	1831.99
0.999999	1	5ul_Azm_Preg1__30dec18_RD3_01_502.03620.03620.3	1968-11-01	CMLKPGFTCAEGECCESCQM	F1MRA8	2162.82
0.999999	1	5ul_Azm_Preg1__30dec18_RD3_01_502.06417.06417.3	1944-11-01	RRALVDSVFQVSVL	P12661	1318.72
0.999999	1	5ul_Azm_Preg1__30dec18_RD3_01_502.06657.06657.3	1988-12-01	VHGTFGAAACSIGFAVRYLNAYTGL	Q1JQ92	2403.14
0.999999	1	5ul_Azm_Preg1__30dec18_RD3_01_502.06744.06744.3	16/80	VLASLIIVANALVAMAVLSLILK	L8HTQ6	2123.3
0.999999	1	5ul_Azm_Preg1__30dec18_RD3_01_502.06933.06933.3	15/56	LQPQPHQPLQPQPPVHP	Q99004	1726.89
0.999999	1	5ul_Azm_Preg1__30dec18_RD3_01_502.07033.07033.3	17/80	WPQCPFNSQSANKRFAERHCGIL	F1MGF6	2503.16
0.999999	1	5ul_Azm_Preg1__30dec18_RD3_01_502.07126.07126.3	1952-11-01	LHLVSPMGTRSTLLAA	Q28193	1497.8
0.999999	1	5ul_Azm_Preg1__30dec18_RD3_01_502.07356.07356.3	1952-12-01	KKGLSDFLGVISDTFA	Q3SX22	1497.77
0.999999	1	5ul_Azm_Preg1__30dec18_RD3_01_502.07413.07413.3	16/84	EGTRCIQVEITPTSSRISRNAVTS	E1BFZ6	2445.28
0.999999	1	5ul_Azm_Preg1__30dec18_RD3_01_502.07449.07449.3	17/80	SNYSRNLSSLHEDSTSLSGLGDS	L8J3Z5	2251.04
0.999999	1	5ul_Azm_Preg1__30dec18_RD3_01_502.07908.07908.3	16/80	ADPQLLGKGRESALSLACSKGYT	Q2KI79	2249.15
0.999999	1	5ul_Azm_Preg1__30dec18_RD3_01_502.07937.07937.3	1952-12-01	PGFYFGELPLSLAACT	E1BGM0	1543.74
0.999999	1	5ul_Azm_Preg1__30dec18_RD3_01_502.07946.07946.3	1948-11-01	DMLASSSKYQHGNMV	F1MI95	1452.65
0.999999	1	5ul_Azm_Preg1__30dec18_RD3_01_502.08024.08024.3	14/60	GMADVGTICSPERSCAVL	F1MRZ2	1767.76
0.999999	1	5ul_Azm_Preg1__30dec18_RD3_01_502.08050.08050.3	1956-11-01	RMTGTPVLVALGDFLGG	L8I5Q0	1505.78
0.999999	1	5ul_Azm_Preg1__30dec18_RD3_01_502.08303.08303.3	20/72	LTVPGPPGPPGAMGPPGPPGA	A6QPB3	1651.8
0.999999	1	5ul_Azm_Preg1__30dec18_RD3_01_502.08585.08585.3	19/68	LRGFIAEHMGSVYIEAPTFD	L8IIW9	2023.98
0.999999	1	5ul_Azm_Preg1__30dec18_RD3_01_502.08643.08643.3	15/60	HCAGANDFEAPFEQRASL	F1MY80	1768.75
0.999999	1	5ul_Azm_Preg1__30dec18_RD3_01_502.08673.08673.3	19/64	HRYKQLDLPNPCSDLACEF	F1MKZ6	2077.96
0.999999	1	5ul_Azm_Preg1__30dec18_RD3_01_502.08681.08681.3	14/56	LEGRVLYSLATKNGVQY	Q24K09	1633.88
0.999999	1	5ul_Azm_Preg1__30dec18_RD3_01_502.08725.08725.3	18/60	KSAAKPHQESISFHSEKK	E1BI97	1781.87
0.999999	1	5ul_Azm_Preg1__30dec18_RD3_01_502.08874.08874.3	14/48	SWESFSNVSYYTRIL	O62664	1650.77
0.999999	1	5ul_Azm_Preg1__30dec18_RD3_01_502.08903.08903.3	18/68	VCEGEPINESGEQNKTSHNG	Q3ZBW8	2028.84
0.999999	1	5ul_Azm_Preg1__30dec18_RD3_01_502.08955.08955.3	14/60	GLLLLGLLIYILYKLGFF	L8I6N4	1864.18
0.999999	1	5ul_Azm_Preg1__30dec18_RD3_01_502.09059.09059.3	1952-12-01	PGNHSSVTEFILAGLT	F1MMR1	1443.74
0.999999	1	5ul_Azm_Preg1__30dec18_RD3_01_502.09072.09072.3	21/72	LQVLAFTRIGDGGPSHPPILE	L8I1D1	1974.07
0.999999	1	5ul_Azm_Preg1__30dec18_RD3_01_502.09096.09096.3	18/64	MIADSLSESTAISLTGCMA	G3N0V4	1770.8
0.999999	1	5ul_Azm_Preg1__30dec18_RD3_01_502.09117.09117.3	20/88	LPGDPGREGFPGPPGFMGPRGSKGA	F1N7Q7	2253.07
0.999999	1	5ul_Azm_Preg1__30dec18_RD3_01_502.09130.09130.3	1952-10-01	VVSAGFDRLVDASSPY	F1N4S1	1419.7
0.999999	1	5ul_Azm_Preg1__30dec18_RD3_01_502.09175.09175.3	22/72	LPVVLFLTAVLLPSFPTEGKD	L8HZZ9	2027.17
0.999999	1	5ul_Azm_Preg1__30dec18_RD3_01_502.09489.09489.3	13/72	EVVCRQLGCGRAVDAVAGAAF	G5E5D7	1928.97
0.999999	1	5ul_Azm_Preg1__30dec18_RD3_01_502.09511.09511.3	16/72	SEAMFLLLSNFTGLKLHFLAP	Q3MI03	2180.17
0.999999	1	5ul_Azm_Preg1__30dec18_RD3_01_502.09615.09615.3	18/52	DILVEADGAWVVKMFY	A7MB32	1576.83
0.999999	1	5ul_Azm_Preg1__30dec18_RD3_01_502.09702.09702.3	15/56	EVQNLNFVKDNSATFIE	L8HUU9	1708.88
0.999999	1	5ul_Azm_Preg1__30dec18_RD3_01_502.09758.09758.3	15/68	VAAVAGTVLLTVGLLVLLEW	F1MS67	1751.08
0.999999	1	5ul_Azm_Preg1__30dec18_RD3_01_502.09805.09805.3	19/72	VQQALRQESLVAEARISENPQ	F1MG97	2138.11
0.999999	1	5ul_Azm_Preg1__30dec18_RD3_01_502.09857.09857.3	20/84	GLPGVPGRDGPPGRPGPPGPPGTP	F1N6W9	2031.07
0.999999	1	5ul_Azm_Preg1__30dec18_RD3_01_502.10057.10057.3	15/76	LGPDLGLPVGSAAFGMPGMTGM	F1MPW8	1862.85
0.999999	1	5ul_Azm_Preg1__30dec18_RD3_01_502.10150.10150.3	20/72	HLAPMDANGYSDPFVRLFLHP	Q17QX4	2162.06
0.999999	1	5ul_Azm_Preg1__30dec18_RD3_01_502.10227.10227.3	17/56	AEAKVKGPKLRMPTFGL	E1BM58	1657.93
0.999999	1	5ul_Azm_Preg1__30dec18_RD3_01_502.10249.10249.3	19/60	LTKDQLDSTIGIHPVCAE	O62768	1753.87
0.999999	1	5ul_Azm_Preg2__30dec18_RD3_01_506.03081.03081.3	1944-10-01	GMRHGFGMFKCSTQ	Q1JPG1	1489.63
0.999999	1	5ul_Azm_Preg2__30dec18_RD3_01_506.03138.03138.3	1956-10-01	PHSEAAGGESTAELEP-	F1N727	1483.64
0.999999	1	5ul_Azm_Preg2__30dec18_RD3_01_506.03232.03232.3	14/64	RPPTLGLLAAPANHGLPTC	P58874	1638.91
0.999999	1	5ul_Azm_Preg2__30dec18_RD3_01_506.03294.03294.3	14/56	VEILSHDSNSQLYNVKY	L8I213	1745.86
0.999999	1	5ul_Azm_Preg2__30dec18_RD3_01_506.03471.03471.3	14/52	YYIIILAWALFYLFSS	F6QN23	1731.96
0.999999	1	5ul_Azm_Preg2__30dec18_RD3_01_506.03516.03516.3	14/60	LAQLSLPSSPSSLNEDSL	A5D7B4	1630.77
0.999999	1	5ul_Azm_Preg2__30dec18_RD3_01_506.03647.03647.3	18/64	RHEMPPHIYAISESAYRCM	Q27991	2059.92
0.999999	1	5ul_Azm_Preg2__30dec18_RD3_01_506.03664.03664.3	19/76	GAESSSPPKVALGVEHQGHEAL	L8IRG4	2028.99
0.999999	1	5ul_Azm_Preg2__30dec18_RD3_01_506.03681.03681.3	20/72	TVIAHTATTHASVIQTVNHVL	L8IUG2	1998.06
0.999999	1	5ul_Azm_Preg2__30dec18_RD3_01_506.03834.03834.3	20/56	LYYRQSSVPDGRSPGAR	L8IWN7	1638.78
0.999999	1	5ul_Azm_Preg2__30dec18_RD3_01_506.04785.04785.3	12/116	VRSIQADGLVWGSSKLVPVGYGIKKFQIQCVV	Q2VYC3	3332.81
0.999999	1	5ul_Azm_Preg2__30dec18_RD3_01_506.05630.05630.3	1936-08-01	YLPIMEFSHPRR	Q2KJJ8	1225.63
0.999999	1	5ul_Azm_Preg2__30dec18_RD3_01_506.05632.05632.3	13/36	AFSCSMSLQEHE	F1MCP1	1224.49
0.999999	1	5ul_Azm_Preg2__30dec18_RD3_01_506.05863.05863.3	1956-12-01	LGPDAAAPGGPGLGAEL	F1N2I4	1235.58
0.999999	1	5ul_Azm_Preg2__30dec18_RD3_01_506.06093.06093.3	16/72	NVKSCFTIGTITVCVEPLSCY	E1BK28	2170.05
0.999999	1	5ul_Azm_Preg2__30dec18_RD3_01_506.06097.06097.3	16/64	DRTPKQKMKMEVRHQKFFD	F1MNG6	2234.19
0.999999	1	5ul_Azm_Preg2__30dec18_RD3_01_506.06153.06153.3	1980-12-01	PTATLEEKTVHTAPPPRPRSDTP	E1BE70	2303.19
0.999999	1	5ul_Azm_Preg2__30dec18_RD3_01_506.06179.06179.3	23/84	ARTAAAANAMSRSPRAASGSPARP	A6QPH7	2172.09
0.999999	1	5ul_Azm_Preg2__30dec18_RD3_01_506.06234.06234.3	1944-10-01	SHMVAVSISYGSCL	E1BNL2	1309.58
0.999999	1	5ul_Azm_Preg2__30dec18_RD3_01_506.06304.06304.3	16/76	RSRSQTPLSSAAASAQDQATPG	L8J4F7	1972.94
0.999999	1	5ul_Azm_Preg2__30dec18_RD3_01_506.06315.06315.3	21/76	RNVTSPIADFPAPPPYSAVTPP	A4IFK4	2040.02
0.999999	1	5ul_Azm_Preg2__30dec18_RD3_01_506.06445.06445.3	19/76	TGLRVALERCSLLEEELGATHK	E1B9F5	2252.16
0.999999	1	5ul_Azm_Preg2__30dec18_RD3_01_506.06624.06624.3	1952-10-01	LGCGVAISIPGGPHLV	B6ULZ8	1333.68
0.999999	1	5ul_Azm_Preg2__30dec18_RD3_01_506.06672.06672.3	18/76	ENKENGIIKTVNEDAEEMEIDE	E1BN25	2290.06
0.999999	1	5ul_Azm_Preg2__30dec18_RD3_01_506.06706.06706.3	20/84	GSESSSSSDKDHSEILNGISNLSL	F1N1K9	2292.04
0.999999	1	5ul_Azm_Preg2__30dec18_RD3_01_506.06774.06774.3	16/72	RKMAEQYKEQAEKGNLRVKQL	A6QLN6	2293.18
0.999999	1	5ul_Azm_Preg2__30dec18_RD3_01_506.06860.06860.3	18/96	GSGSGMGGGSATSGPGTGSLPRWQLAL	Q08E34	2291.06
0.999999	1	5ul_Azm_Preg2__30dec18_RD3_01_506.06883.06883.3	16/72	LYSLRNKDVKEALNKLLEKKS	G3MYG4	2288.32
0.999999	1	5ul_Azm_Preg2__30dec18_RD3_01_506.07008.07008.3	1944-12-01	SAKEMEHSVGIQMR	L8IHR1	1374.63
0.999999	1	5ul_Azm_Preg2__30dec18_RD3_01_506.07154.07154.3	19/80	LKELTGNLSRNSPSSSLSPGSGG	E1BM27	2074.03
0.999999	1	5ul_Azm_Preg2__30dec18_RD3_01_506.07161.07161.3	17/68	GVALQHRPVVLIRELSGKRA	F1MPT2	2070.25
0.999999	1	5ul_Azm_Preg2__30dec18_RD3_01_506.07302.07302.3	1952-11-01	SPGPSPGSAHSIMGPS	A7Z019	1306.6
0.999999	1	5ul_Azm_Preg2__30dec18_RD3_01_506.07306.07306.3	20/76	PLSSNMIERSVVEAAVQECSQS	A7YWS7	2252.04
0.999999	1	5ul_Azm_Preg2__30dec18_RD3_01_506.07350.07350.3	1952-12-01	LVDSFLLCSNMEESFV	F1MSC0	1676.71
0.999999	1	5ul_Azm_Preg2__30dec18_RD3_01_506.07432.07432.3	19/88	VTENGVSHRGEANLNDTARIYYLRS	L8IB62	2648.31
0.999999	1	5ul_Azm_Preg2__30dec18_RD3_01_506.07534.07534.3	1948-12-01	SIRISDGGKLVIKDQ	E1BKX1	1412.84
0.999999	1	5ul_Azm_Preg2__30dec18_RD3_01_506.07592.07592.3	14/52	PLPAPLYSFPGASCPV	G3X7K5	1475.71
0.999999	1	5ul_Azm_Preg2__30dec18_RD3_01_506.07617.07617.3	16/72	KQNVSPLQANEVSILRRKCQQ	E1BLB4	2239.19
0.999999	1	5ul_Azm_Preg2__30dec18_RD3_01_506.07639.07639.3	19/80	RFLCLGWGLPALVVAISVGFTKA	G3X6K9	2247.25
0.999999	1	5ul_Azm_Preg2__30dec18_RD3_01_506.07724.07724.3	22/92	QLKEISSSIESQKKEETRGKGKGTGG	F1N415	2576.38
0.999999	1	5ul_Azm_Preg2__30dec18_RD3_01_506.07810.07810.3	1948-12-01	LMKVQQLKETGHVSG	L8HPF7	1499.78
0.999999	1	5ul_Azm_Preg2__30dec18_RD3_01_506.07823.07823.3	13/60	LQVKNIIYHAVKDAVGTL	E1BE97	1754.97
0.999999	1	5ul_Azm_Preg2__30dec18_RD3_01_506.07859.07859.3	25/100	FSGAFTAKPGGRDGGGGVAPGTASPPFS	L8J5T7	2315.13
0.999999	1	5ul_Azm_Preg2__30dec18_RD3_01_506.07921.07921.3	14/60	FPSNYVALGTPAAPAGLQ	E1B7H4	1497.78
0.999999	1	5ul_Azm_Preg2__30dec18_RD3_01_506.07943.07943.3	15/76	CHMTTALPLGPGILGLLTGIVT	Q0II74	1973.14
0.999999	1	5ul_Azm_Preg2__30dec18_RD3_01_506.08023.08023.3	14/56	EQLENTFVDYAKKLSDR	G3N3U8	1769.88
0.999999	1	5ul_Azm_Preg2__30dec18_RD3_01_506.08042.08042.3	13/60	LKQPHPLAPPSQAQFSH-	L8I5B8	1768.9
0.999999	1	5ul_Azm_Preg2__30dec18_RD3_01_506.08062.08062.3	20/72	LILFLAMGIMIFSSLVFFAEK	Q4ZHA6	2164.14
0.999999	1	5ul_Azm_Preg2__30dec18_RD3_01_506.08173.08173.3	17/64	FFMPGFAPLTSRGSQQYRA	Q6B856	1941.95
0.999999	1	5ul_Azm_Preg2__30dec18_RD3_01_506.08433.08433.3	1956-12-01	PGPPQPPPGLLGQASLL	Q2TBN4	1427.78
0.999999	1	5ul_Azm_Preg2__30dec18_RD3_01_506.08470.08470.3	17/64	LGILKAVNDSMHLIAITGY	E1BK14	1751.96
0.999999	1	5ul_Azm_Preg2__30dec18_RD3_01_506.08493.08493.3	14/56	KNVEYTFTGIYTFESLL	E1B9G2	1782.84
0.999999	1	5ul_Azm_Preg2__30dec18_RD3_01_506.08523.08523.3	14/60	NSDELFESASVDPLQMSE	F1MRT7	1769.77
0.999999	1	5ul_Azm_Preg2__30dec18_RD3_01_506.08537.08537.3	17/60	PCPAVMSKSESSKSPEEL	G3MYU0	1767.77
0.999999	1	5ul_Azm_Preg2__30dec18_RD3_01_506.08550.08550.3	1968-12-01	PPPPPQATEGPQAPAPMAPA	E1BPY0	1752.85
0.999999	1	5ul_Azm_Preg2__30dec18_RD3_01_506.08678.08678.3	17/68	HISQRSQTEAVTFLANHDDS	A5D9H9	2030.97
0.999999	1	5ul_Azm_Preg2__30dec18_RD3_01_506.08695.08695.3	16/80	GMSPGAGAMAGMSGSAGAAGVGG	F1MZB6	1725.71
0.999999	1	5ul_Azm_Preg2__30dec18_RD3_01_506.08781.08781.3	13/56	LHISMASAPLVKHTAGA	A5PJL2	1518.8
0.999999	1	5ul_Azm_Preg2__30dec18_RD3_01_506.08897.08897.3	19/64	LEARQAEFTEMKSDLKHLE	L8HSS2	2032
0.999999	1	5ul_Azm_Preg2__30dec18_RD3_01_506.08944.08944.3	14/60	DRSPAHSVRASQAGPEPG	G5E5M8	1645.83
0.999999	1	5ul_Azm_Preg2__30dec18_RD3_01_506.09010.09010.3	1948-12-01	NNLLSALQMDSDEMK	E1BJ15	1497.63
0.999999	1	5ul_Azm_Preg2__30dec18_RD3_01_506.09036.09036.3	19/64	LMAAVGPPQQQVRMAHQQV	E1BP63	1907.91
0.999999	1	5ul_Azm_Preg2__30dec18_RD3_01_506.09114.09114.3	1948-12-01	APEKIAELESHTDKV	F1MTQ0	1495.75
0.999999	1	5ul_Azm_Preg2__30dec18_RD3_01_506.09205.09205.3	17/60	PPALPPPAPSPPAWQARA	L8I2S9	1651.88
0.999999	1	5ul_Azm_Preg2__30dec18_RD3_01_506.09317.09317.3	22/64	KVHIGRLTRNVTKDHIMEL	A6QR16	2034.08
0.999999	1	5ul_Azm_Preg2__30dec18_RD3_01_506.09341.09341.3	20/56	GPVVAGVIGARKPQYDL	L8INS1	1568.87
0.999999	1	5ul_Azm_Preg2__30dec18_RD3_01_506.09347.09347.3	18/84	APDQSSTIQLHPATSPAVSPTASS	F1N6I8	2191.08
0.999999	1	5ul_Azm_Preg2__30dec18_RD3_01_506.09596.09596.3	16/52	EGAFPFRLKDAVLSEG	E1BK77	1548.83
0.999999	1	5ul_Azm_Preg2__30dec18_RD3_01_506.09602.09602.3	25/92	TLDSSAAPAPPAAPAPTPAAPAPSPT	L8I6W7	2121.07
0.999999	1	5ul_Azm_Preg2__30dec18_RD3_01_506.09767.09767.3	19/84	FLCDMSVFDAYMNPGPRKQSSLFQ	Q1LZD4	2594.16
0.999999	1	5ul_Azm_Preg2__30dec18_RD3_01_506.09806.09806.3	18/88	QAPPSNRQLGSPTGSLPLVMHLANG	F1N1U0	2356.23
0.999999	1	5ul_Azm_Preg2__30dec18_RD3_01_506.09883.09883.3	15/44	RTEFQLHSYACVYW	L8IWU7	1516.67
0.999999	1	5ul_Azm_Preg2__30dec18_RD3_01_506.09961.09961.3	19/72	GVPGLPSTFQYGPAVFPVAPT	A1L505	1943.02
0.999999	1	5ul_Azm_Preg2__30dec18_RD3_01_506.09969.09969.3	23/88	PQPSSGVNGNMQPPGTAGQPPASAL	L8J0H3	2164.98
0.999999	1	5ul_Azm_Preg2__30dec18_RD3_01_506.10035.10035.3	23/84	FSSLGSVDSLDPSSQPDPSGRLSA	F1MCL7	2187.03
0.999999	1	5ul_Azm_Preg2__30dec18_RD3_01_506.10111.10111.3	20/64	DQEALLSYAREAADFSTQQ	G3MWR8	1898.9
0.999999	1	5ul_Azm_Preg2__30dec18_RD3_01_506.10120.10120.3	16/56	NEIGHSRRAAAIGITQV	Q5EA43	1578.86
0.999999	1	5ul_Azm_Preg2__30dec18_RD3_01_506.10210.10210.3	17/64	LMIAASVLGLPAILLLLTV	Q3MHK4	1708.06
0.999999	1	5ul_Azm_Preg2__30dec18_RD3_01_506.10277.10277.3	1944-10-01	SPKRSIRDSGYIDC	E1BC91	1405.73
0.999999	1	5ul_Azm_Preg2__30dec18_RD3_01_506.10353.10353.3	16/56	LKCIAKKALEGKEGSME	Q08DQ1	1648.86
0.999999	1	5ul_Azm_Preg2__30dec18_RD3_01_506.10579.10579.3	17/56	LLEPGQELGETALHLAV	O97902	1576.81
0.999999	1	5ul_Azm_Preg2__30dec18_RD3_01_506.10583.10583.3	18/60	EMNEDFSLHSSSNPGTNE	A7Z060	1751.71
0.999999	1	5ul_Azm_Preg2__30dec18_RD3_01_506.10588.10588.3	21/80	GHVNVKGSGGEWKGPQLSSALNL	F1MCK2	2164.1
0.999999	1	5ul_Azm_Preg2__30dec18_RD3_01_506.10596.10596.3	1944-12-01	YRRCLQILAAGLFL	F2Z4E7	1416.8
0.999999	1	5ul_Azm_Preg2__30dec18_RD3_01_506.10627.10627.3	14/68	PVSPKLSPGNSGNYSSGASS	E1BCF6	1707.81
0.999999	1	5ul_Azm_Preg2__30dec18_RD3_01_506.10703.10703.3	20/60	LIHEDSAPTINSNNVIQE	E1BC50	1750.85
0.999999	1	5ul_Azm_Preg2__30dec18_RD3_01_506.10732.10732.3	17/48	TTLGPAMVTPGVATL	E1BP52	1213.64
0.999999	1	5ul_Azm_Preg2__30dec18_RD3_01_506.10763.10763.3	15/40	DPEEGQELPVDME	Q3T0W4	1258.54
0.999999	1	5ul_Azm_Preg2__30dec18_RD3_01_506.10784.10784.3	19/48	LNNLADSIEEGTMPP	P04696	1405.6
0.999999	1	5ul_Azm_Preg2__30dec18_RD3_01_506.10794.10794.3	16/44	KVHSENNSPFLTIT	A3KN04	1356.67
0.999999	1	5ul_Azm_Preg2__30dec18_RD3_01_506.10800.10800.3	14/44	LDGLPAAEDMPETQ	F1MPD0	1260.52
0.999999	1	5ul_Azm_Preg2__30dec18_RD3_01_506.10805.10805.3	16/40	LSQQPQNLIMASL	L8IVG6	1215.59
0.999999	1	5ul_Azm_Preg2__30dec18_RD3_01_506.10820.10820.3	14/48	LGPGSTGLLVGQKFP	A2VE49	1259.69
0.999999	1	5ul_Azm_Preg2__30dec18_RD3_01_506.10861.10861.3	13/48	KVMLNDPLPGQKASP	E1B783	1368.71
0.999999	1	5ul_Azm_Preg2__30dec18_RD3_01_506.10867.10867.3	14/88	TSVETESLTGPQAVARASSAALSCS	E1BGX7	2291.11
0.999999	1	5ul_Azm_Preg2__30dec18_RD3_01_506.10918.10918.3	20/80	PQVLPQLSPEQLGMIEKLVAAQQ	Q5E9B6	2291.26
0.999999	1	5ul_Azm_Preg3__30dec18_RD3_01_510.03547.03547.3	18/64	LRLGPLFSLLNENHREQTT	Q0P5A6	2023.06
0.999999	1	5ul_Azm_Preg3__30dec18_RD3_01_510.05393.05393.3	1936-09-01	QKDLLAEFRAYV	L8ISC9	1224.65
0.999999	1	5ul_Azm_Preg3__30dec18_RD3_01_510.05835.05835.3	16/68	WLIYDEMTRAHRIANIRCCS	F1MNU7	2291.11
0.999999	1	5ul_Azm_Preg3__30dec18_RD3_01_510.05935.05935.3	16/68	SKNEKRLEEQNEEMMKKVLA	L8HR26	2291.16
0.999999	1	5ul_Azm_Preg3__30dec18_RD3_01_510.05978.05978.3	17/76	EYENEVEASMDMDLLESSNISE	L8IK75	2290.95
0.999999	1	5ul_Azm_Preg3__30dec18_RD3_01_510.05984.05984.3	1944-10-01	GTVNKCPKSGDGFH	A0JNB1	1308.61
0.999999	1	5ul_Azm_Preg3__30dec18_RD3_01_510.06017.06017.3	19/72	DKYQESQKAEKEKKKEKAVLK	E1BKI7	2291.28
0.999999	1	5ul_Azm_Preg3__30dec18_RD3_01_510.06113.06113.3	1940-12-01	LTARQQAAFRDFD	E1B7J3	1309.65
0.999999	1	5ul_Azm_Preg3__30dec18_RD3_01_510.06287.06287.3	1936-11-01	LCHGEKLMLFRE	G5E5Y3	1305.63
0.999999	1	5ul_Azm_Preg3__30dec18_RD3_01_510.06393.06393.3	15/52	GARLVAAPIASANPAR	F1MN71	1320.75
0.999999	1	5ul_Azm_Preg3__30dec18_RD3_01_510.06932.06932.3	16/68	LRTLKAAFKTLSSAQDSEAA	L8IHP2	1923.01
0.999999	1	5ul_Azm_Preg3__30dec18_RD3_01_510.06986.06986.3	19/68	PGTAALLGPAVGVQDNEAMT	F1MSQ8	1728.84
0.999999	1	5ul_Azm_Preg3__30dec18_RD3_01_510.07090.07090.3	16/60	VATSHTGKVGVWNAVTQH	E1BNC2	1654.84
0.999999	1	5ul_Azm_Preg3__30dec18_RD3_01_510.07270.07270.3	17/68	YLVIWCIDLEVEEKCALMEQ	Q5EAC6	2249.08
0.999999	1	5ul_Azm_Preg3__30dec18_RD3_01_510.07272.07272.3	13/52	EQNGKVMGAELRHVLT	Q148H2	1566.83
0.999999	1	5ul_Azm_Preg3__30dec18_RD3_01_510.07362.07362.3	1936-12-01	LWINRVGPQMHV	A4FV92	1236.62
0.999999	1	5ul_Azm_Preg3__30dec18_RD3_01_510.07381.07381.3	21/88	LTVAAHTKQGPSVAGGSGTVHTSAV	F1MPR9	2120.06
0.999999	1	5ul_Azm_Preg3__30dec18_RD3_01_510.07387.07387.3	16/76	DHVFPRRSDGGPPYYMIETYKN	E1B993	2428.16
0.999999	1	5ul_Azm_Preg3__30dec18_RD3_01_510.07512.07512.3	1936-09-01	SFCPMQCPPNSH	G3X6I0	1236.47
0.999999	1	5ul_Azm_Preg3__30dec18_RD3_01_510.07531.07531.3	18/68	VIAIDDLSFSSGCLPADDDL	A5PJC2	1909.83
0.999999	1	5ul_Azm_Preg3__30dec18_RD3_01_510.07569.07569.3	14/44	RRTVLGLARCWRRF	Q3SZ22	1542.87
0.999999	1	5ul_Azm_Preg3__30dec18_RD3_01_510.07691.07691.3	20/72	LKSSEGMSLAEFLYQVLQAYD	A5D7G0	2163.06
0.999999	1	5ul_Azm_Preg3__30dec18_RD3_01_510.07706.07706.3	1956-12-01	KSRSSHNNGTCFGTDLN	Q0II73	1651.7
0.999999	1	5ul_Azm_Preg3__30dec18_RD3_01_510.07783.07783.3	22/72	KVEAPGPLHPAVQLAPQQPLP	G3MZX3	1961.07
0.999999	1	5ul_Azm_Preg3__30dec18_RD3_01_510.07791.07791.3	19/80	NPEDTGKLFMGAGVSGIIKVMYG	A0A2H4J183	2212.13
0.999999	1	5ul_Azm_Preg3__30dec18_RD3_01_510.07873.07873.3	15/40	DKVLTAMNQTWHP	Q58DC1	1327.67
0.999999	1	5ul_Azm_Preg3__30dec18_RD3_01_510.07874.07874.3	17/60	PGALMYPNYAFIDPSSYS	G3N0J0	1807.81
0.999999	1	5ul_Azm_Preg3__30dec18_RD3_01_510.07904.07904.3	22/64	TVRKLAKPPHLIMRIMDCV	E1B9R5	2077.15
0.999999	1	5ul_Azm_Preg3__30dec18_RD3_01_510.07909.07909.3	20/88	RVQGFRRRGGKAGGFGGRGGGHAAK	E1BE19	2212.16
0.999999	1	5ul_Azm_Preg3__30dec18_RD3_01_510.07970.07970.3	1952-12-01	REKVTGDLVALKMVKM	E1BH31	1545.88
0.999999	1	5ul_Azm_Preg3__30dec18_RD3_01_510.08028.08028.3	13/56	TEETGGSVAFSPGNLST	F1MG06	1450.66
0.999999	1	5ul_Azm_Preg3__30dec18_RD3_01_510.08042.08042.3	22/64	SSITLHIGDVNDNMPVFER	A6QNV3	1899.9
0.999999	1	5ul_Azm_Preg3__30dec18_RD3_01_510.08057.08057.3	13/52	QIRSHLHRGDPHWMPE	L8I2Z7	1753.86
0.999999	1	5ul_Azm_Preg3__30dec18_RD3_01_510.08116.08116.3	24/92	QGRPPQAQPPPGPGPAGVKAGAKPGG	E1BMN9	2188.19
0.999999	1	5ul_Azm_Preg3__30dec18_RD3_01_510.08160.08160.3	18/64	PVHCGTLCLLSALCCLVLS	Q0IIM5	1987.97
0.999999	1	5ul_Azm_Preg3__30dec18_RD3_01_510.08167.08167.3	16/60	YSLMRTQTFVNCSAAIAV	A6QL49	1768.86
0.999999	1	5ul_Azm_Preg3__30dec18_RD3_01_510.08172.08172.3	1952-11-01	LKHSALRHMISFLLGA	L8HWA0	1608.89
0.999999	1	5ul_Azm_Preg3__30dec18_RD3_01_510.08185.08185.3	21/84	ASCDDPSAFGPSGSTPDLRPGATE	E1BGD9	2190.95
0.999999	1	5ul_Azm_Preg3__30dec18_RD3_01_510.08253.08253.3	15/64	GLASLSELGEMEESIVSGA	G3N285	1765.83
0.999999	1	5ul_Azm_Preg3__30dec18_RD3_01_510.08263.08263.3	1948-12-01	LKEEPTDGIKVPSSR	F1MHZ3	1385.7
0.999999	1	5ul_Azm_Preg3__30dec18_RD3_01_510.08281.08281.3	14/48	LPVDVTSPVGDFYRL	E1BMS0	1450.71
0.999999	1	5ul_Azm_Preg3__30dec18_RD3_01_510.08319.08319.3	15/56	RILNTSLSDTTSVPTQS	L8HRC8	1575.8
0.999999	1	5ul_Azm_Preg3__30dec18_RD3_01_510.08347.08347.3	15/64	RGIDIQDVSMVVNYDMAKN	L8IHY1	1928.89
0.999999	1	5ul_Azm_Preg3__30dec18_RD3_01_510.08472.08472.3	14/60	KQLSKEKEAHGKYLAEEL	E1BN16	1858.94
0.999999	1	5ul_Azm_Preg3__30dec18_RD3_01_510.08484.08484.3	22/76	FVDSVAVLTINEASAEDSGDYL	F1N757	2053.93
0.999999	1	5ul_Azm_Preg3__30dec18_RD3_01_510.08505.08505.3	20/76	ALFIPDIGKVISVIGGLAACFL	A7E3U5	2089.16
0.999999	1	5ul_Azm_Preg3__30dec18_RD3_01_510.08519.08519.3	23/72	DKLTPLESVPPAAIAFIICLL	Q3SYV8	2052.17
0.999999	1	5ul_Azm_Preg3__30dec18_RD3_01_510.08524.08524.3	14/56	FSPVVGETLQTLTTSST	A6QLC5	1518.78
0.999999	1	5ul_Azm_Preg3__30dec18_RD3_01_510.08533.08533.3	16/60	LIDELTGDIHAMERLDRE	F1N416	1882.92
0.999999	1	5ul_Azm_Preg3__30dec18_RD3_01_510.08663.08663.3	17/84	NPPTAATVGPALSPGPAQATQQQL	G3N1N9	2087.06
0.999999	1	5ul_Azm_Preg3__30dec18_RD3_01_510.08804.08804.3	14/48	LFFLVMYMAILVGTD	F1N151	1519.78
0.999999	1	5ul_Azm_Preg3__30dec18_RD3_01_510.08808.08808.3	20/64	AMQQKRQVQHGRRPGNPRG	E1BGL2	2088.1
0.999999	1	5ul_Azm_Preg3__30dec18_RD3_01_510.08820.08820.3	14/56	GCPPESSPPKRLLNLTL	E1BD97	1707.9
0.999999	1	5ul_Azm_Preg3__30dec18_RD3_01_510.08836.08836.3	22/80	LEYEEQAFQDMSGGDPPGSSTSH	A5PJT1	2233.86
0.999999	1	5ul_Azm_Preg3__30dec18_RD3_01_510.08966.08966.3	15/52	APAAVSSSSTSSSSED	Q58DB9	1282.55
0.999999	1	5ul_Azm_Preg3__30dec18_RD3_01_510.09088.09088.3	14/60	FFSPVSISAGLAMLSLGA	Q3SYR0	1548.82
0.999999	1	5ul_Azm_Preg3__30dec18_RD3_01_510.09202.09202.3	17/52	VRARDDDSGNNAAILF	E1BF45	1486.71
0.999999	1	5ul_Azm_Preg3__30dec18_RD3_01_510.09229.09229.3	19/72	LGMVDGLLLTPIAMSFPFCHS	L8II16	2121.01
0.999999	1	5ul_Azm_Preg3__30dec18_RD3_01_510.09342.09342.3	17/60	PRNSSPHLNPLTSASPPL	E1BBM6	1673.85
0.999999	1	5ul_Azm_Preg3__30dec18_RD3_01_510.09422.09422.3	16/64	RLRLFFYGVCNVISITCAY	Q17QG0	2032.03
0.999999	1	5ul_Azm_Preg3__30dec18_RD3_01_510.09489.09489.3	1952-11-01	EGTNTSGASECESVSD	L8IE44	1384.54
0.999999	1	5ul_Azm_Preg3__30dec18_RD3_01_510.09523.09523.3	18/56	SILKQEHTQLHIWIALA	F1N4V2	1842.05
0.999999	1	5ul_Azm_Preg3__30dec18_RD3_01_510.09526.09526.3	13/48	QPQAVLCAHRRLEAV	A3QU32	1519.8
0.999999	1	5ul_Azm_Preg3__30dec18_RD3_01_510.09578.09578.3	15/56	LSKHMLTHSSTKDYMCT	L8J019	1840.79
0.999999	1	5ul_Azm_Preg3__30dec18_RD3_01_510.09579.09579.3	15/44	HMFSVIPHKFLPNS	E1BFV8	1444.75
0.999999	1	5ul_Azm_Preg3__30dec18_RD3_01_510.09650.09650.3	14/60	PRPVPYFGSTMAYHKGIP	P79102	1838.91
0.999999	1	5ul_Azm_Preg3__30dec18_RD3_01_510.09707.09707.3	21/80	TSQNHIVSPLQSSYSRLMVGSSK	G5E6H6	2292.12
0.999999	1	5ul_Azm_Preg3__30dec18_RD3_01_510.09743.09743.3	22/84	GATGVTSSAGIKSPITIITTKVMT	L8HQM0	2191.21
0.999999	1	5ul_Azm_Preg3__30dec18_RD3_01_510.09858.09858.3	15/60	FQTVTQMVRVWRNECLRV	F1MSP8	2075.05
0.999999	1	5ul_Azm_Preg3__30dec18_RD3_01_510.09864.09864.3	14/52	WRGVARAPTMAEASAP	G3N386	1386.7
0.999999	1	5ul_Azm_Preg3__30dec18_RD3_01_510.09919.09919.3	17/68	EGENRTRLLPGKDMTEEEML	L8INS3	2136.98
0.999999	1	5ul_Azm_Preg3__30dec18_RD3_01_510.09944.09944.3	16/56	ALLISHIVQSEIGDFDE	L8IGM9	1684.87
0.999999	1	5ul_Azm_Preg3__30dec18_RD3_01_510.09952.09952.3	1948-12-01	WCMLHNFGGNHGLFG	A6QM01	1518.65
0.999999	1	5ul_Azm_Preg3__30dec18_RD3_01_510.09995.09995.3	28/96	GYGTGGYGGGGGYGGRGGYSGGGYGGG	Q28141	2146.87
0.999999	1	5ul_Azm_Preg3__30dec18_RD3_01_510.10008.10008.3	14/52	PPPVDVRDVVGRPVDP	F1MYK6	1518.82
0.999999	1	5ul_Azm_Preg3__30dec18_RD3_01_510.10020.10020.3	14/56	LSMAHPSEGTMAFLGNQ	E1BGM4	1564.66
0.999999	1	5ul_Azm_Preg3__30dec18_RD3_01_510.10046.10046.3	14/52	SQSPDGVLDLNKAAEV	L8IGG6	1455.72
0.999999	1	5ul_Azm_Preg3__30dec18_RD3_01_510.10051.10051.3	20/104	AGLTEPAGAAPPAGVGASGTVTMAPAAAL	E1BGK7	2292.14
0.999999	1	5ul_Azm_Preg3__30dec18_RD3_01_510.10135.10135.3	22/80	LLEGGANPDAKDHYEATAMHRAA	Q2KI59	2253.02
0.999999	1	5ul_Azm_Preg3__30dec18_RD3_01_510.10154.10154.3	20/84	KRPVTLRLPASLAEYTVTQLRPNA	G3N0B6	2494.4
0.999999	1	5ul_Azm_Preg3__30dec18_RD3_01_510.10188.10188.3	18/64	MMFVLIMLNTLCLAMQHSE	Q704P3	2052.99
0.999999	1	5ul_Azm_Preg3__30dec18_RD3_01_510.10294.10294.3	16/48	ESTAPSSLVFTPFAS	L8I1I3	1323.67
0.999999	1	5ul_Azm_Preg3__30dec18_RD3_01_510.10314.10314.3	21/92	GISKNTSNLNGRYEAVVETKLNSSGT	F1MPP3	2580.31
0.999999	1	5ul_Azm_Preg3__30dec18_RD3_01_510.10322.10322.3	18/72	REKKESTPSTASLPSYDSVTK	M0QSP4	2025.97
0.999999	1	5ul_Azm_Preg3__30dec18_RD3_01_510.10347.10347.3	19/56	CPVYPVTTAALSLSGLT	F1MC90	1487.82
0.999999	1	5ul_Azm_Preg3__30dec18_RD3_01_510.10350.10350.3	17/48	GSPWGNSTVTSTAAV	P48042	1277.59
0.999999	1	5ul_Azm_Preg3__30dec18_RD3_01_510.10375.10375.3	15/44	GQMGPQGPPLHQGG	E1BCT7	1245.59
0.999999	1	5ul_Azm_Preg3__30dec18_RD3_01_510.10381.10381.3	19/60	SGRGGRGRGRPARPSPSP	E1BNN8	1619.88
0.999999	1	5ul_Azm_Preg4__31dec18_RD3_01_513.03295.03295.3	1964-11-01	KHHQSPAIEHGRRSNVFVD	Q32KY3	1970
0.999999	1	5ul_Azm_Preg4__31dec18_RD3_01_513.03443.03443.3	19/68	STFHEADLEGTSGLGVSGSP	P13608	1762.8
0.999999	1	5ul_Azm_Preg4__31dec18_RD3_01_513.03458.03458.3	13/64	VSSKAVAFTLHDMLALGAN	Q58D55	1730.9
0.999999	1	5ul_Azm_Preg4__31dec18_RD3_01_513.03494.03494.3	13/64	PALLKLACTDTHVNEAELN	L8HUL2	1896.96
0.999999	1	5ul_Azm_Preg4__31dec18_RD3_01_513.05246.05246.3	16/56	SWRRRDFPAKECSAQRE	E1BLQ9	1961.98
0.999999	1	5ul_Azm_Preg4__31dec18_RD3_01_513.05959.05959.3	17/80	PRASSVISTAEGTTRRTSIHDFL	L8IWC4	2291.16
0.999999	1	5ul_Azm_Preg4__31dec18_RD3_01_513.06152.06152.3	20/80	VFTHRPEPSKPPLAPKPAVPQPP	F1N415	2290.26
0.999999	1	5ul_Azm_Preg4__31dec18_RD3_01_513.06226.06226.3	20/84	DCPGQGPAPDKALPRALAKGYPKG	G3N2D0	2291.22
0.999999	1	5ul_Azm_Preg4__31dec18_RD3_01_513.06293.06293.3	16/76	FFDWGGSNNTIMSIRPIQLEPL	F1MTZ5	2290.11
0.999999	1	5ul_Azm_Preg4__31dec18_RD3_01_513.06440.06440.3	14/44	KKPHGHDSDSDSEL	F1N6Y9	1309.52
0.999999	1	5ul_Azm_Preg4__31dec18_RD3_01_513.06454.06454.3	18/84	GPAHTARLEDAHDLVAFSAVAEAV	F1MJY3	2290.13
0.999999	1	5ul_Azm_Preg4__31dec18_RD3_01_513.06504.06504.3	20/84	GGGTEVIQVTNVSPSASSEQMRTL	Q148M1	2293.09
0.999999	1	5ul_Azm_Preg4__31dec18_RD3_01_513.06542.06542.3	16/80	AAPVEKIDTMLVLESSGNLVLYT	E1BAB6	2290.21
0.999999	1	5ul_Azm_Preg4__31dec18_RD3_01_513.06546.06546.3	24/92	GLDTAASSTAASTATAAAAALAYYRD	E1BI59	2288.13
0.999999	1	5ul_Azm_Preg4__31dec18_RD3_01_513.06556.06556.3	1940-12-01	ELLTSDVSQMNDR	A7Z051	1237.55
0.999999	1	5ul_Azm_Preg4__31dec18_RD3_01_513.06801.06801.3	24/80	APAFEVDPQRAGPEEPGEMSVDE	G3MZ72	2256
0.999999	1	5ul_Azm_Preg4__31dec18_RD3_01_513.06836.06836.3	19/72	LCDKQCLCSAQNVIDYGTCVC	Q08E39	2289.95
0.999999	1	5ul_Azm_Preg4__31dec18_RD3_01_513.06943.06943.3	21/76	VGIDVQVESIDSISEVDMDFTM	L8I227	2213.99
0.999999	1	5ul_Azm_Preg4__31dec18_RD3_01_513.06983.06983.3	16/96	MAGAGPAPGLPGAGGPVVPGPGAGIPG	Q0P5L0	1990.06
0.999999	1	5ul_Azm_Preg4__31dec18_RD3_01_513.07023.07023.3	16/68	LGASLTLCVLSCLLHAAHVL	Q0II35	1920.99
0.999999	1	5ul_Azm_Preg4__31dec18_RD3_01_513.07051.07051.3	20/72	QVFKTSATLQTHFNEVHAKRP	E1BPV9	2213.17
0.999999	1	5ul_Azm_Preg4__31dec18_RD3_01_513.07107.07107.3	17/56	LSTMILPLTPMLSVLE-	B1P0M6	1675.88
0.999999	1	5ul_Azm_Preg4__31dec18_RD3_01_513.07162.07162.3	20/88	SSSADPKAPPPPPVSSGEPPTLGEN	E1BPF3	2213.09
0.999999	1	5ul_Azm_Preg4__31dec18_RD3_01_513.07199.07199.3	18/88	ALVSTLEPPYFVTELEPLEASVGDS	F1N757	2504.26
0.999999	1	5ul_Azm_Preg4__31dec18_RD3_01_513.07388.07388.3	21/72	NLTLHKCTHNGEDPTCPVCNK	F1N0E1	2251.98
0.999999	1	5ul_Azm_Preg4__31dec18_RD3_01_513.07415.07415.3	20/76	SSDDYGKKEVLDYSGEMDLTSV	J9TPF5	2250.98
0.999999	1	5ul_Azm_Preg4__31dec18_RD3_01_513.07463.07463.3	20/88	NKQGGLRLAQARALIKIDVNKTRKL	Q3SZP8	2576.57
0.999999	1	5ul_Azm_Preg4__31dec18_RD3_01_513.07539.07539.3	20/72	MRDRTTLQNCYWKYLIVDEGH	L8HVP9	2429.18
0.999999	1	5ul_Azm_Preg4__31dec18_RD3_01_513.07733.07733.3	1944-09-01	EEQLASAMELPCGL	Q0IIF7	1320.57
0.999999	1	5ul_Azm_Preg4__31dec18_RD3_01_513.07860.07860.3	25/76	FPGHLGLHVIMVGVDVAAGFSQ	L8HS72	1975.04
0.999999	1	5ul_Azm_Preg4__31dec18_RD3_01_513.07863.07863.3	14/60	HAPLAQAQAPVTSELEKF	F1N6T9	1651.88
0.999999	1	5ul_Azm_Preg4__31dec18_RD3_01_513.07877.07877.3	18/76	SASWRLSPSEGEPGAGACAETK	Q27ID4	2031.9
0.999999	1	5ul_Azm_Preg4__31dec18_RD3_01_513.07923.07923.3	20/76	TPEGASEPSPAAAPAREDPPGG	E1BN44	1901.88
0.999999	1	5ul_Azm_Preg4__31dec18_RD3_01_513.08071.08071.3	21/80	PAPHTATKDMGPASSLPSQPAAL	L8IWM3	2049.98
0.999999	1	5ul_Azm_Preg4__31dec18_RD3_01_513.08145.08145.3	13/52	SSSSKPVVFPVPPPDD	F1MGR7	1451.77
0.999999	1	5ul_Azm_Preg4__31dec18_RD3_01_513.08156.08156.3	17/68	PAVARPPSVDSLSSASTSHS	A6QLT2	1767.88
0.999999	1	5ul_Azm_Preg4__31dec18_RD3_01_513.08257.08257.3	1944-12-01	LGLQLQLSLGLVPV	F1MPH8	1236.74
0.999999	1	5ul_Azm_Preg4__31dec18_RD3_01_513.08293.08293.3	20/72	MCDIFYSLRQMATQRFPNDPH	L8J1E3	2358.09
0.999999	1	5ul_Azm_Preg4__31dec18_RD3_01_513.08419.08419.3	14/56	LLMVVFGECLRKAAMFT	G3N1V4	1770.9
0.999999	1	5ul_Azm_Preg4__31dec18_RD3_01_513.08481.08481.3	15/60	GVHRASSGASLPDTEEPF	G3MZW4	1651.78
0.999999	1	5ul_Azm_Preg4__31dec18_RD3_01_513.08515.08515.3	17/72	DRILAINSVSLKGRPLSEAIH	F1MFS5	2036.21
0.999999	1	5ul_Azm_Preg4__31dec18_RD3_01_513.08530.08530.3	16/72	SLPSTILATDTMVGEIASASA	L8I2C8	1875.95
0.999999	1	5ul_Azm_Preg4__31dec18_RD3_01_513.08620.08620.3	18/48	KLQEQLMGAVVMEKP	Q2HJB1	1490.75
0.999999	1	5ul_Azm_Preg4__31dec18_RD3_01_513.08653.08653.3	26/96	LGHVDLASRLVNKVFKLLQSQIQQQTW	F1N1Q8	2849.59
0.999999	1	5ul_Azm_Preg4__31dec18_RD3_01_513.08682.08682.3	15/48	PLVVVGLSRDDGDYL	Q28107	1406.7
0.999999	1	5ul_Azm_Preg4__31dec18_RD3_01_513.08806.08806.3	15/48	SRNICSLVNWLKSFK	A6QNR7	1635.86
0.999999	1	5ul_Azm_Preg4__31dec18_RD3_01_513.08900.08900.3	18/56	PPDQQRLQAGWPLAGLG	G3MWS3	1648.87
0.999999	1	5ul_Azm_Preg4__31dec18_RD3_01_513.08903.08903.3	17/56	LKELQQKINNSSNKIQV	F1MRD5	1770.96
0.999999	1	5ul_Azm_Preg4__31dec18_RD3_01_513.08933.08933.3	16/64	ESPRAALPGVMVGVGAAPE	F1MNG8	1548.84
0.999999	1	5ul_Azm_Preg4__31dec18_RD3_01_513.08942.08942.3	18/60	NMYASILLLATISADRFL	Q673L2	1783.95
0.999999	1	5ul_Azm_Preg4__31dec18_RD3_01_513.08969.08969.3	19/64	SDHVLTMKDDGTFYRFQAP	L8IN33	2042.95
0.999999	1	5ul_Azm_Preg4__31dec18_RD3_01_513.09214.09214.3	1948-11-01	KYNMSFVDSVAVLTL	F1N757	1460.69
0.999999	1	5ul_Azm_Preg4__31dec18_RD3_01_513.09226.09226.3	16/56	GFSSPYEGVLMKNPKAR	E1BNV7	1666.84
0.999999	1	5ul_Azm_Preg4__31dec18_RD3_01_513.09324.09324.3	20/72	KYSTPPAAPAASTDQASHNGL	F1N4N9	1841.82
0.999999	1	5ul_Azm_Preg4__31dec18_RD3_01_513.09349.09349.3	20/84	ALLLRSRDPRAGPVAPGGLPKDAL	E1BJI4	2255.29
0.999999	1	5ul_Azm_Preg4__31dec18_RD3_01_513.09356.09356.3	15/64	SSASPSGKPSGSAVNMGSV	E1BGB2	1519.69
0.999999	1	5ul_Azm_Preg4__31dec18_RD3_01_513.09367.09367.3	1952-11-01	RTSTVLSRSLSAVVVR	P07926	1417.81
0.999999	1	5ul_Azm_Preg4__31dec18_RD3_01_513.09394.09394.3	18/80	LMDGFKASKALLTACKLQVFDVL	G3MY50	2357.21
0.999999	1	5ul_Azm_Preg4__31dec18_RD3_01_513.09398.09398.3	1936-11-01	LHTGKRPYKCID	G3N0T2	1258.66
0.999999	1	5ul_Azm_Preg4__31dec18_RD3_01_513.09543.09543.3	20/80	YNFIHKMNTAEFKSATFPNAGPR	L8HSL7	2321.13
0.999999	1	5ul_Azm_Preg4__31dec18_RD3_01_513.09588.09588.3	23/100	RVVRCPVAAAPTAPTAPPPRGPNPGSQL	E1BNS4	2564.33
0.999999	1	5ul_Azm_Preg4__31dec18_RD3_01_513.09616.09616.3	19/80	GPVTTPEHQLLKTPSSSSLSQRV	L8II00	2292.21
0.999999	1	5ul_Azm_Preg4__31dec18_RD3_01_513.09650.09650.3	21/92	PPGAGEGSPGSPFSAARRAAGPGGQA	G3MX55	2138.03
0.999999	1	5ul_Azm_Preg4__31dec18_RD3_01_513.09684.09684.3	21/76	AMPVDVKAGVRVMQVSPDGQHL	L8HTX4	2181.07
0.999999	1	5ul_Azm_Preg4__31dec18_RD3_01_513.09805.09805.3	17/68	ASPAASHPLASSPLSGPPSP	F1MSU2	1658.83
0.999999	1	5ul_Azm_Preg4__31dec18_RD3_01_513.09989.09989.3	20/72	TGPKGGMGAPGMQGSPGPAGL	Q8MHZ9	1625.73
0.999999	1	5ul_Azm_Preg4__31dec18_RD3_01_513.10000.10000.3	22/64	VLLWPHQPSGQGSFWANLG	Q5I2M5	1936.96
0.999999	1	5ul_Azm_Preg4__31dec18_RD3_01_513.10013.10013.3	23/84	RCLPVCIDVGTDNPALLKDPFYMG	Q08DM3	2553.2
0.999999	1	5ul_Azm_Preg4__31dec18_RD3_01_513.10063.10063.3	17/72	TYDPNYNYDDEDEDENAMDAD	A7MBJ5	2296.79
0.999999	1	5ul_Azm_Preg4__31dec18_RD3_01_513.10072.10072.3	20/80	GMVDICPQSSSASIHEMNAFSAN	G3N1X4	2296.98
0.999999	1	5ul_Azm_Preg4__31dec18_RD3_01_513.10159.10159.3	15/60	PRLAPQLPPASSQPRAPL	E1BD01	1684.94
0.999999	1	5ul_Azm_Preg4__31dec18_RD3_01_513.10218.10218.3	14/60	LSILGYVAVHMAGVQTGL	F1N3J6	1617.82
0.999999	1	5ul_Azm_Preg4__31dec18_RD3_01_513.10242.10242.3	18/56	SGSSPMSRGEMSLAEVQ	Q9TU34	1536.69
0.999999	1	5ul_Azm_Preg4__31dec18_RD3_01_513.10301.10301.3	16/52	AEKIDGAASQGKSSCS	Q56JV3	1436.66
0.999999	1	5ul_Azm_Preg4__31dec18_RD3_01_513.10307.10307.3	18/52	TCRLMVSMLDRDMSGT	Q0IIA3	1685.74
0.999999	1	5ul_Azm_Preg4__31dec18_RD3_01_513.10361.10361.3	18/60	NFSDDDEQGSSSPKENSS	G3X6B3	1727.68
0.999999	1	5ul_Azm_Preg4__31dec18_RD3_01_513.10394.10394.3	19/60	GVLGLMTLWNVDMDCISL	L8I1Q4	1881.87
0.999999	1	5ul_Azm_Preg4__31dec18_RD3_01_513.10408.10408.3	15/52	RPPAPRSPGLPASSAH	G3N2R3	1303.69
0.999999	1	5ul_Azm_Preg4__31dec18_RD3_01_513.10423.10423.3	17/60	SSGTPASSSSSHKTPASC	M5FK72	1487.69
0.999999	1	5ul_Azm_Preg4__31dec18_RD3_01_513.10426.10426.3	16/64	CIIESALLVAMAFDRYVAL	E1BHQ3	1881.01
0.999999	1	5ul_Azm_Preg4__31dec18_RD3_01_513.10471.10471.3	19/68	TTTATTTTTTGTPTPTPTTT	F2FB40	1750.85
0.999999	1	5ul_Azm_Preg4__31dec18_RD3_01_513.10478.10478.3	23/68	KDADGGWRRPGPGAPAAVTE	M5FK82	1749.85
0.999999	1	5ul_Azm_Preg4__31dec18_RD3_01_513.10486.10486.3	14/48	YMFGKGIYFADMSSK	E1BFH8	1484.63
0.999999	1	5ul_Azm_Preg4__31dec18_RD3_01_513.10497.10497.3	18/64	GGGGGGASGGGANSKPAQK	Q0VCF8	1328.61
0.999999	1	5ul_Azm_Preg5__31dec18_RD3_01_519.03590.03590.3	15/76	SGPPPPGAYPHPLESGGSHHAH	L8HVC8	1960.92
0.999999	1	5ul_Azm_Preg5__31dec18_RD3_01_519.05830.05830.3	14/48	SHFKSLATGGNVSQA	E1BPY6	1344.68
0.999999	1	5ul_Azm_Preg5__31dec18_RD3_01_519.06102.06102.3	1944-08-01	LERQMGAISQGMSV	G3X7K5	1309.58
0.999999	1	5ul_Azm_Preg5__31dec18_RD3_01_519.06499.06499.3	15/80	AGTYVCLAQNALGTAQKRVEVIV	F1MER7	2290.21
0.999999	1	5ul_Azm_Preg5__31dec18_RD3_01_519.06693.06693.3	13/76	DINNVGLRGHYLCSVYGARLMV	Q2KIS4	2292.16
0.999999	1	5ul_Azm_Preg5__31dec18_RD3_01_519.06718.06718.3	17/80	RRYSPSLPVPVKLVLPALEMMYV	F1MTS9	2402.31
0.999999	1	5ul_Azm_Preg5__31dec18_RD3_01_519.06881.06881.3	15/76	NIMSKTTSEVWLIDGLSPWDPP	Q0II34	2290.12
0.999999	1	5ul_Azm_Preg5__31dec18_RD3_01_519.06888.06888.3	17/68	EDVDPSVGRFRNMVQTAVVP	Q28147	2005.01
0.999999	1	5ul_Azm_Preg5__31dec18_RD3_01_519.06918.06918.3	21/88	SNSTEVDNGHGSSGGDNGEEDGEEE	Q28862	2290.83
0.999999	1	5ul_Azm_Preg5__31dec18_RD3_01_519.07086.07086.3	13/68	SLRLSSGGASFGAGNACSMP	Q0P5J4	1741.79
0.999999	1	5ul_Azm_Preg5__31dec18_RD3_01_519.07287.07287.3	18/72	GYMVEPEWSLYPPPSHAYADS	Q0VCT2	2250.99
0.999999	1	5ul_Azm_Preg5__31dec18_RD3_01_519.07296.07296.3	19/68	CCSDHQHCCPKGYTCVARRH	E1BHY6	2290.96
0.999999	1	5ul_Azm_Preg5__31dec18_RD3_01_519.07346.07346.3	1948-09-01	NVIASASDDTTIMVW	A6QLZ8	1321.64
0.999999	1	5ul_Azm_Preg5__31dec18_RD3_01_519.07516.07516.3	15/64	QIVMNCADIDIITASYVPE	E1BP91	1909.92
0.999999	1	5ul_Azm_Preg5__31dec18_RD3_01_519.07518.07518.3	14/52	TALARETGGTYHVILD	Q2TBV5	1499.81
0.999999	1	5ul_Azm_Preg5__31dec18_RD3_01_519.07580.07580.3	14/44	RQPIYLEVRVLNRT	Q9BH10	1498.86
0.999999	1	5ul_Azm_Preg5__31dec18_RD3_01_519.07703.07703.3	15/60	YASICQQNGLVPIVEPEV	Q3T0S5	1752.87
0.999999	1	5ul_Azm_Preg5__31dec18_RD3_01_519.07774.07774.3	14/64	LEHDPHDSLGHGLGSEPSP	E1BC64	1769.76
0.999999	1	5ul_Azm_Preg5__31dec18_RD3_01_519.07941.07941.3	22/84	PPSTGNSASLSLPLVLQPGLSEPP	Q7YS08	2163.14
0.999999	1	5ul_Azm_Preg5__31dec18_RD3_01_519.08032.08032.3	15/56	RRTSMGGTQQQFVEGVR	Q0VCX4	1639.76
0.999999	1	5ul_Azm_Preg5__31dec18_RD3_01_519.08044.08044.3	19/68	QSCPFSSTAAAKCFAGLLNK	E1BP36	1900.88
0.999999	1	5ul_Azm_Preg5__31dec18_RD3_01_519.08050.08050.3	23/92	GPPGPPGLPGPPGPKGAKGSSGPTGP	G3MZI7	2063.08
0.999999	1	5ul_Azm_Preg5__31dec18_RD3_01_519.08067.08067.3	13/44	RHFTNLCLNGRCLP	L8IXA0	1503.71
0.999999	1	5ul_Azm_Preg5__31dec18_RD3_01_519.08184.08184.3	17/68	NLLAGAENCSYLPVDSAHDL	L8HYS5	1930.87
0.999999	1	5ul_Azm_Preg5__31dec18_RD3_01_519.08324.08324.3	18/64	FKRFKETTRSFSNECLGTT	P10731	2060.01
0.999999	1	5ul_Azm_Preg5__31dec18_RD3_01_519.08412.08412.3	1940-11-01	VLLDPKVLRIFPD	F1MAX3	1309.81
0.999999	1	5ul_Azm_Preg5__31dec18_RD3_01_519.08438.08438.3	24/120	TSGKMSTPLMRASASRATSTPLMRASASGMMSM	F1MRL4	3190.5
0.999999	1	5ul_Azm_Preg5__31dec18_RD3_01_519.08553.08553.3	18/52	ADWVSGHFPSPIRLEF	P28339	1638.82
0.999999	1	5ul_Azm_Preg5__31dec18_RD3_01_519.08558.08558.3	16/52	KKIIKQIISHSSKVLH	L8IEZ5	1593
0.999999	1	5ul_Azm_Preg5__31dec18_RD3_01_519.08577.08577.3	16/60	SALYSSLNKVILYSLSKP	F1MG90	1798.02
0.999999	1	5ul_Azm_Preg5__31dec18_RD3_01_519.08598.08598.3	1940-12-01	LYQMQPSGPRPLL	L8IK16	1272.63
0.999999	1	5ul_Azm_Preg5__31dec18_RD3_01_519.08617.08617.3	15/48	LQPIPRNQLFQSYFN	F1N0E1	1636.84
0.999999	1	5ul_Azm_Preg5__31dec18_RD3_01_519.08647.08647.3	20/88	GGAAGARGAGAGAAASQELNNSRPA	A5PKL5	2053
0.999999	1	5ul_Azm_Preg5__31dec18_RD3_01_519.08664.08664.3	14/72	WGEGPPTVLSDSPSINISGSC	A1A4K5	1812.87
0.999999	1	5ul_Azm_Preg5__31dec18_RD3_01_519.08674.08674.3	17/68	DPAQDHSPRDPSRGGPAAAS	L8IQF2	1785.85
0.999999	1	5ul_Azm_Preg5__31dec18_RD3_01_519.08690.08690.3	23/108	THAVGGSAHGIGGTLGSRVKNGGQETIEMV	P33545	2719.35
0.999999	1	5ul_Azm_Preg5__31dec18_RD3_01_519.08780.08780.3	16/56	TEAIDKNKADLSRMSGK	Q2KJH6	1649.8
0.999999	1	5ul_Azm_Preg5__31dec18_RD3_01_519.08850.08850.3	14/44	DRDEEENKRDDKRD	L8HXX6	1588.76
0.999999	1	5ul_Azm_Preg5__31dec18_RD3_01_519.09005.09005.3	16/68	HQTTLGSQRRAAAVLLSSTA	E1BFW3	1859.02
0.999999	1	5ul_Azm_Preg5__31dec18_RD3_01_519.09016.09016.3	16/56	SIQPPSSSAPVIADQRH	A6QPH9	1564.82
0.999999	1	5ul_Azm_Preg5__31dec18_RD3_01_519.09027.09027.3	14/48	ASSKLGITMIVSHEL	F1MU34	1416.73
0.999999	1	5ul_Azm_Preg5__31dec18_RD3_01_519.09036.09036.3	20/72	QLFRGFSFVAITSDDESQAMQ	F1MZW8	2119.99
0.999999	1	5ul_Azm_Preg5__31dec18_RD3_01_519.09060.09060.3	21/76	KMDMCCAASPSQVAMASFSSAG	E1BF07	2139.8
0.999999	1	5ul_Azm_Preg5__31dec18_RD3_01_519.09144.09144.3	18/80	DTSLSAAAAASLSVAAASGGAGA	E1BCC6	1689.85
0.999999	1	5ul_Azm_Preg5__31dec18_RD3_01_519.09234.09234.3	14/52	STGMARARTSVSQQRH	Q95L39	1547.8
0.999999	1	5ul_Azm_Preg5__31dec18_RD3_01_519.09254.09254.3	1948-11-01	GRSQGSPAQPSPATG	F1MKU3	1282.63
0.999999	1	5ul_Azm_Preg5__31dec18_RD3_01_519.09277.09277.3	18/76	NFGGPTNLERDITLDYPLEEDL	L8HLM3	2293.07
0.999999	1	5ul_Azm_Preg5__31dec18_RD3_01_519.09303.09303.3	19/84	TAMNNLGMVPVGLPGQQLVSDSIC	F1N0M8	2271.12
0.999999	1	5ul_Azm_Preg5__31dec18_RD3_01_519.09381.09381.3	16/72	DHPLNEQDSIQKSPLSETLDV	Q3B7N9	2150.05
0.999999	1	5ul_Azm_Preg5__31dec18_RD3_01_519.09401.09401.3	19/84	RMKGKTGGKKRKADGGKTSSPDVL	E1BE83	2232.2
0.999999	1	5ul_Azm_Preg5__31dec18_RD3_01_519.09482.09482.3	15/64	GDLGGAGIPGGVAGVVPAA	P04985	1405.76
0.999999	1	5ul_Azm_Preg5__31dec18_RD3_01_519.09487.09487.3	22/80	VTGNLSVRGDGAPGYTLPGFRFL	E1BCZ6	2181.1
0.999999	1	5ul_Azm_Preg5__31dec18_RD3_01_519.09489.09489.3	24/68	GIIMVGVIVGSKKTGINPDN	L8IFV6	1840.05
0.999999	1	5ul_Azm_Preg5__31dec18_RD3_01_519.09500.09500.3	20/60	SWGYRRNAGIADYLTIEE	F1N5H2	1896.95
0.999999	1	5ul_Azm_Preg5__31dec18_RD3_01_519.09563.09563.3	1956-11-01	EDLAGKAGGMVLVKGEG	F1N6S8	1443.78
0.999999	1	5ul_Azm_Preg5__31dec18_RD3_01_519.09600.09600.3	14/44	MMYEAELEHLQQQR	F1MHG6	1533.68
0.999999	1	5ul_Azm_Preg5__31dec18_RD3_01_519.09619.09619.3	16/64	LSTSSLKVTDAFARLMSTV	L8IT11	1813.92
0.999999	1	5ul_Azm_Preg5__31dec18_RD3_01_519.09721.09721.3	21/80	DSDCRVVVISGAGKMFSSGIDLM	F6PRB5	2213.08
0.999999	1	5ul_Azm_Preg5__31dec18_RD3_01_519.09740.09740.3	15/72	LLDVAPLSLGLETAGGVMTAL	Q27965	1813.95
0.999999	1	5ul_Azm_Preg5__31dec18_RD3_01_519.09819.09819.3	21/80	SKSDRLYAMKAEVLARAGIPTSS	F6R2J7	2292.23
0.999999	1	5ul_Azm_Preg5__31dec18_RD3_01_519.09848.09848.3	20/72	LHSEFMEVMNEVWSSSQIRSA	Q3SZ00	2298
0.999999	1	5ul_Azm_Preg5__31dec18_RD3_01_519.10032.10032.3	17/56	AGRKPLKSGMKELAVFR	P13384	1659.95
0.999999	1	5ul_Azm_Preg5__31dec18_RD3_01_519.10105.10105.3	1952-12-01	GSPASPAGSTPAIPKV	L8HNH5	1279.68
0.999999	1	5ul_Azm_Preg5__31dec18_RD3_01_519.10225.10225.3	13/40	CKPIPANLQLCHG	Q3SX29	1289.69
0.999999	1	5ul_Azm_Preg5__31dec18_RD3_01_519.10232.10232.3	16/52	NKNVSTPYSCAMHLSE	Q05B74	1593.73
0.999999	1	5ul_Azm_Preg5__31dec18_RD3_01_519.10308.10308.3	18/76	NFETKQEAEQAIQCLNGKLALS	Q3ZCC5	2290.16
0.999999	1	5ul_Azm_Preg5__31dec18_RD3_01_519.10322.10322.3	15/56	RAAPLPGLLPAPGLAPH	E1BI80	1353.8
0.999999	1	5ul_Azm_Preg5__31dec18_RD3_01_519.10360.10360.3	20/72	STARNRFENRVAEKQKLFQED	P07470	2363.25
0.999999	1	5ul_Azm_Preg5__31dec18_RD3_01_519.10446.10446.3	15/48	PIPVKSNPSGTRPGH	A6QNS7	1308.71
0.999999	1	5ul_Azm_Preg6__31dec18_RD3_01_522.03262.03262.3	15/80	CPFALGGPAGAHAGAAAVPATAD	P19754	1773.92
0.999999	1	5ul_Azm_Preg6__31dec18_RD3_01_522.03461.03461.3	17/60	RFRESIYHIMATQPGAPS	L8HYX0	1832.89
0.999999	1	5ul_Azm_Preg6__31dec18_RD3_01_522.03564.03564.3	18/68	DQSGTINSYEMRNAGKDAGF	Q9XSJ1	1897.86
0.999999	1	5ul_Azm_Preg6__31dec18_RD3_01_522.03626.03626.3	17/72	DDHTDYQTPPGEKAKIMEMAR	E1BC23	2160.98
0.999999	1	5ul_Azm_Preg6__31dec18_RD3_01_522.03628.03628.3	17/72	KTGFSNGIINGYSWYPLKGGM	A7MBD9	2029.99
0.999999	1	5ul_Azm_Preg6__31dec18_RD3_01_522.03655.03655.3	16/84	PGPAGPKGDPGSRGPMGMRGPPGL	L8J0I7	2031.97
0.999999	1	5ul_Azm_Preg6__31dec18_RD3_01_522.03706.03706.3	24/76	SILNPPDPQIEKEPVTGQIDKN	E1BCZ2	2230.18
0.999999	1	5ul_Azm_Preg6__31dec18_RD3_01_522.06695.06695.3	1952-10-01	LMGLEALKSHIMAAKA	L8IAU0	1498.8
0.999999	1	5ul_Azm_Preg6__31dec18_RD3_01_522.06792.06792.3	19/88	QPPASLQTGNHSNGPTDLSMKGGAS	F1MPV8	2252.05
0.999999	1	5ul_Azm_Preg6__31dec18_RD3_01_522.06840.06840.3	15/64	VLAFGLLVAAATAAVAAAQ	F1MEP6	1499.87
0.999999	1	5ul_Azm_Preg6__31dec18_RD3_01_522.06866.06866.3	13/80	LRVSTAAEHNSSSLKQDPAAAVA	G3MXS3	2138.07
0.999999	1	5ul_Azm_Preg6__31dec18_RD3_01_522.06898.06898.3	1948-11-01	AMYGGSVPQSSAGPL	F1MFN2	1236.54
0.999999	1	5ul_Azm_Preg6__31dec18_RD3_01_522.06931.06931.3	18/72	DGSKPIWKYETGPGGTSRGKP	F1MXK2	2005.04
0.999999	1	5ul_Azm_Preg6__31dec18_RD3_01_522.06983.06983.3	16/64	TRKCSKCGKAFGYSASLTK	G3N1X0	1919.93
0.999999	1	5ul_Azm_Preg6__31dec18_RD3_01_522.07175.07175.3	16/60	EKGTETETGSAVSAAQCQ	Q3T058	1595.71
0.999999	1	5ul_Azm_Preg6__31dec18_RD3_01_522.07179.07179.3	1944-12-01	DKDQYDWLLKERTD	P79135	1593.82
0.999999	1	5ul_Azm_Preg6__31dec18_RD3_01_522.07195.07195.3	14/60	QPVTSGTAISSASLVSSQ	A0JNC9	1462.75
0.999999	1	5ul_Azm_Preg6__31dec18_RD3_01_522.07212.07212.3	1948-12-01	LYLVIVSANALVIHT	G5E5Y2	1410.82
0.999999	1	5ul_Azm_Preg6__31dec18_RD3_01_522.07267.07267.3	20/80	LQLGMEDPSLSSRMLTEDTNVAV	F1MP31	2293.06
0.999999	1	5ul_Azm_Preg6__31dec18_RD3_01_522.07404.07404.3	22/80	KDLISYSSMSVLGLFSPTMTRAK	L8ICR9	2291.12
0.999999	1	5ul_Azm_Preg6__31dec18_RD3_01_522.07405.07405.3	1940-12-01	KQLSSEGTVRFLN	L8I4Y9	1235.65
0.999999	1	5ul_Azm_Preg6__31dec18_RD3_01_522.07478.07478.3	22/84	QQYPMPELGRALSAPLASTATTTP	E1BGL2	2291.15
0.999999	1	5ul_Azm_Preg6__31dec18_RD3_01_522.07625.07625.3	17/76	MIYFTVTANSKACVDGLQAQKE	J7M5G6	2213.12
0.999999	1	5ul_Azm_Preg6__31dec18_RD3_01_522.07635.07635.3	20/72	VAECLSAGMEGTKTSNNSMQQ	A5D7V5	2030.83
0.999999	1	5ul_Azm_Preg6__31dec18_RD3_01_522.07740.07740.3	15/56	KGPMIVHCSAGVGRTGT	F1N008	1497.72
0.999999	1	5ul_Azm_Preg6__31dec18_RD3_01_522.07803.07803.3	1948-11-01	SNGGDPRPIAASLRD	F1MNH3	1322.71
0.999999	1	5ul_Azm_Preg6__31dec18_RD3_01_522.07811.07811.3	25/64	DFIQDMPEGLMLDADTFSA	L8IIS8	1960.84
0.999999	1	5ul_Azm_Preg6__31dec18_RD3_01_522.07847.07847.3	19/80	NPVEELTVDSPPVQQISQLLSLL	L8HNN1	2291.23
0.999999	1	5ul_Azm_Preg6__31dec18_RD3_01_522.07856.07856.3	21/76	TEYSARLDSLSRCVAPPPGGKG	F1MRX7	2159.08
0.999999	1	5ul_Azm_Preg6__31dec18_RD3_01_522.07913.07913.3	24/80	LPKEPKSTALRSEDSSIKPPEP-	Q2T9S6	2292.2
0.999999	1	5ul_Azm_Preg6__31dec18_RD3_01_522.08039.08039.3	22/96	DPALRAAGSQAGVAVGREGWSGPRSHS	F1MP76	2473.27
0.999999	1	5ul_Azm_Preg6__31dec18_RD3_01_522.08058.08058.3	18/64	LGIGSFQTFDVLVNTNTGL	F1N3H5	1768.86
0.999999	1	5ul_Azm_Preg6__31dec18_RD3_01_522.08073.08073.3	1948-10-01	NEPADPTEAAVPLLA	L8IDR3	1321.68
0.999999	1	5ul_Azm_Preg6__31dec18_RD3_01_522.08088.08088.3	1944-10-01	RVGALANTLSRHTF	A4IFB3	1238.67
0.999999	1	5ul_Azm_Preg6__31dec18_RD3_01_522.08142.08142.3	19/80	TINSLVIAAIIVTRKLHHPANYL	F6R5F6	2342.36
0.999999	1	5ul_Azm_Preg6__31dec18_RD3_01_522.08153.08153.3	17/68	NIDSQAQLADDILNAPHPDM	G3N1J7	1931.92
0.999999	1	5ul_Azm_Preg6__31dec18_RD3_01_522.08188.08188.3	14/52	RGAQKGSSPPAHSLSQ	A5PKG5	1322.66
0.999999	1	5ul_Azm_Preg6__31dec18_RD3_01_522.08206.08206.3	18/56	FDAERPVDCSVIVVNKQ	F1MM36	1699.86
0.999999	1	5ul_Azm_Preg6__31dec18_RD3_01_522.08228.08228.3	20/60	AYESAVSFHFSNYFVGFL	A7MB52	1899.85
0.999999	1	5ul_Azm_Preg6__31dec18_RD3_01_522.08333.08333.3	19/60	SITSGMPNDFSEMPQQST	Q0IIH3	1767.74
0.999999	1	5ul_Azm_Preg6__31dec18_RD3_01_522.08400.08400.3	23/64	YHADINLLYWSDEEAVVDF	Q24K09	1987.92
0.999999	1	5ul_Azm_Preg6__31dec18_RD3_01_522.08441.08441.3	15/52	DSFLSAIINYTNSSTV	F1N2X7	1516.74
0.999999	1	5ul_Azm_Preg6__31dec18_RD3_01_522.08464.08464.3	1948-10-01	VIMAISPILGLSTAV	E1BLT5	1285.73
0.999999	1	5ul_Azm_Preg6__31dec18_RD3_01_522.08568.08568.3	21/68	WAPPLDSPGTPSPDGPWCCS	G3N1Q8	1909.8
0.999999	1	5ul_Azm_Preg6__31dec18_RD3_01_522.08721.08721.3	1948-10-01	ARSSMRSGSSMSTIG	L8IAK4	1385.64
0.999999	1	5ul_Azm_Preg6__31dec18_RD3_01_522.08820.08820.3	18/68	AIVRIAEALSKMKLQPFATE	Q0V8B7	2031.16
0.999999	1	5ul_Azm_Preg6__31dec18_RD3_01_522.08890.08890.3	21/64	CLEHYEFLLDKAAQRDNEE	Q2KJC1	2090.01
0.999999	1	5ul_Azm_Preg6__31dec18_RD3_01_522.08896.08896.3	23/92	QSPAPTPTPTPTLSPASAPTPAPTPA	L8ICK7	2253.15
0.999999	1	5ul_Azm_Preg6__31dec18_RD3_01_522.08902.08902.3	22/60	GGTGHIILDNVQCVGNEA	F1N2X6	1724.82
0.999999	1	5ul_Azm_Preg6__31dec18_RD3_01_522.08946.08946.3	24/116	GTGAGAGGPGTGHLPPGAGTGPGGGAMFWGHQ	G5E5H1	2586.18
0.999999	1	5ul_Azm_Preg6__31dec18_RD3_01_522.08988.08988.3	16/56	FANEVAAKIMNLTEFSL	L8IWN7	1652.81
0.999999	1	5ul_Azm_Preg6__31dec18_RD3_01_522.09007.09007.3	19/96	PRTAGLAFGALFGAGVLVTTVVAGGIA	L8I124	2317.32
0.999999	1	5ul_Azm_Preg6__31dec18_RD3_01_522.09021.09021.3	15/56	LILEGKTIKGCVSVEPY	G3N272	1628.88
0.999999	1	5ul_Azm_Preg6__31dec18_RD3_01_522.09074.09074.3	17/64	DVNMIKTAHIGVGISGQEG	E1BPC3	1752.92
0.999999	1	5ul_Azm_Preg6__31dec18_RD3_01_522.09095.09095.3	19/84	HGGGGHRGGGFAGGAGASERGKFS	A7MB15	1945.93
0.999999	1	5ul_Azm_Preg6__31dec18_RD3_01_522.09131.09131.3	27/84	PQNPGANSTRGRGVDLTEPTQPTR	Q0IIG7	2295.12
0.999999	1	5ul_Azm_Preg6__31dec18_RD3_01_522.09156.09156.3	19/72	NCLSIGGSIYPTSLIKLLLAG	F1MGK2	2018.15
0.999999	1	5ul_Azm_Preg6__31dec18_RD3_01_522.09228.09228.3	16/68	LPLGVTTPDTSYSDMAAGSD	L8HUZ3	1784.78
0.999999	1	5ul_Azm_Preg6__31dec18_RD3_01_522.09304.09304.3	15/56	ALALSCMADYGAPIFPF	E1BPS5	1640.76
0.999999	1	5ul_Azm_Preg6__31dec18_RD3_01_522.09324.09324.3	13/48	SEAVAHMSLEECVEQ	L8IQK0	1518.63
0.999999	1	5ul_Azm_Preg6__31dec18_RD3_01_522.09333.09333.3	21/80	LSNFLSRQNTISFAACITQFYLY	L8I706	2480.22
0.999999	1	5ul_Azm_Preg6__31dec18_RD3_01_522.09396.09396.3	1956-12-01	EMAPIRIFHKEPPSPSH	L8I310	1705.9
0.999999	1	5ul_Azm_Preg6__31dec18_RD3_01_522.09497.09497.3	22/68	DPFKGKYVTYDLDGDVEQYH	E1BL82	2136.01
0.999999	1	5ul_Azm_Preg6__31dec18_RD3_01_522.09532.09532.3	18/72	FSEEKRRQLQEERPELSESEL	L8HWG7	2358.14
0.999999	1	5ul_Azm_Preg6__31dec18_RD3_01_522.09624.09624.3	13/44	CLLILHSYAFIVAA	L8HP42	1358.8
0.999999	1	5ul_Azm_Preg6__31dec18_RD3_01_522.09667.09667.3	15/48	HALYAICDVFTQYLE	O46382	1575.76
0.999999	1	5ul_Azm_Preg6__31dec18_RD3_01_522.09748.09748.3	20/60	LHRRMEAVVEVAAMCGVN	A7MBE8	1813.88
0.999999	1	5ul_Azm_Preg6__31dec18_RD3_01_522.09759.09759.3	16/52	KWTVYHHYIQAGGGYL	F1N4I6	1650.76
0.999999	1	5ul_Azm_Preg6__31dec18_RD3_01_522.09766.09766.3	17/52	CVTLVQKTLAQAMMYT	F1MBJ7	1627.83
[truncated: 2,775 more rows]

## Sheet: Lactation
iprobability	probability	spectrum ID	ions	peptide	protein	calc_neutral_pep_mass
0.999999	1	10ul_Azm_Lac1_28dec18_RD1_01_483.00438.00438.3	19/56	LALGLLAAPAAAVIRIP	F1MMR6	1418.9
0.999999	1	10ul_Azm_Lac1_28dec18_RD1_01_483.00440.00440.3	17/56	SAEVEAGGALSASSPMA	G5E5L9	1375.63
0.999999	1	10ul_Azm_Lac1_28dec18_RD1_01_483.00459.00459.3	15/52	RPPADDGGADILGYIL	F1N757	1372.65
0.999999	1	10ul_Azm_Lac1_28dec18_RD1_01_483.00508.00508.2	2022-09-01	YNSDRYPNDSFAKD	L8ILL2	1412.63
0.999999	1	10ul_Azm_Lac1_28dec18_RD1_01_483.00525.00525.3	17/80	ANRSLSAVVSFPIITAGPGFIAT	A6QQU6	2116.17
0.999999	1	10ul_Azm_Lac1_28dec18_RD1_01_483.00526.00526.2	2014-07-01	RYDSPSQVKG	A2VDN2	922.44
0.999999	1	10ul_Azm_Lac1_28dec18_RD1_01_483.00540.00540.3	1940-08-01	DSDYELSSKTMSR	F1N5T6	1246.54
0.999999	1	10ul_Azm_Lac1_28dec18_RD1_01_483.02329.02329.2	2024-10-01	YASGGAWSEPGRAGG	F1MSS9	1201.55
0.999999	1	10ul_Azm_Lac1_28dec18_RD1_01_483.02342.02342.3	1960-11-01	AGSTHLTALHFAAKEGHV	G5E660	1675.84
0.999999	1	10ul_Azm_Lac1_28dec18_RD1_01_483.02430.02430.3	19/68	EDKTNLQDVIGASLQQLLAS	E1B7M4	1926.04
0.999999	1	10ul_Azm_Lac1_28dec18_RD1_01_483.02495.02495.3	16/72	HPPNPAVPVHPVPPPHALAAH	Q17R00	1877.03
0.999999	1	10ul_Azm_Lac1_28dec18_RD1_01_483.02502.02502.3	17/84	GPGKGGPESITNSTEYPPTGSPGQ	L8I0Z7	2128.99
0.999999	1	10ul_Azm_Lac1_28dec18_RD1_01_483.02515.02515.2	2022-12-01	CREPGIAGLVKIVK	Q0VC96	1250.77
0.999999	1	10ul_Azm_Lac1_28dec18_RD1_01_483.02516.02516.3	19/64	KHKKKELSLESGVYSFEEE	E1BIR1	2009.01
0.999999	1	10ul_Azm_Lac1_28dec18_RD1_01_483.02554.02554.3	20/72	GGKGTPVDNTDRCCLAHDCCY	F1MN86	2234.89
0.999999	1	10ul_Azm_Lac1_28dec18_RD1_01_483.02555.02555.2	2024-12-01	SGLRLTIVWGLLVLL	Q3T146	1451.92
0.999999	1	10ul_Azm_Lac1_28dec18_RD1_01_483.02574.02574.2	1932-09-01	VRHQRVHAAAGRTPPSPGA	L8IZZ8	1793.95
0.999999	1	10ul_Azm_Lac1_28dec18_RD1_01_483.02576.02576.3	20/80	QPATGTTATPKRKKRVVATTYSP	A6QQ62	2233.25
0.999999	1	10ul_Azm_Lac1_28dec18_RD1_01_483.02581.02581.3	22/96	LATRGQVEPPPPSSPETLALRPRIQPQ	E1BE85	2693.46
0.999999	1	10ul_Azm_Lac1_28dec18_RD1_01_483.02590.02590.2	2026-12-01	QGLEIVPNGITLTMDY	L8HUI3	1487.75
0.999999	1	10ul_Azm_Lac1_28dec18_RD1_01_483.02602.02602.3	19/84	VTSFAELAKGRKKAAGSGSPPLRA	L8I9C8	2228.24
0.999999	1	10ul_Azm_Lac1_28dec18_RD1_01_483.02616.02616.3	22/68	AGIPGVGPFGGQQPGVPLGY	F1N0H9	1632.86
0.999999	1	10ul_Azm_Lac1_28dec18_RD1_01_483.02620.02620.3	23/76	SESRESQDLPQEDSCPDPLDGD	E1BGM0	2272.94
0.999999	1	10ul_Azm_Lac1_28dec18_RD1_01_483.02670.02670.3	19/80	KVKLDPDSGQTVLCGMGELHIEL	A6QNM2	2297.1
0.999999	1	10ul_Azm_Lac1_28dec18_RD1_01_483.02671.02671.3	24/72	VGNVTILAVVRTERSLHKPMF	E1BPG5	2120.19
0.999999	1	10ul_Azm_Lac1_28dec18_RD1_01_483.02677.02677.3	22/80	TNRSEALRAQGSVYKIPEAWLLL	F1MYU7	2400.29
0.999999	1	10ul_Azm_Lac1_28dec18_RD1_01_483.02685.02685.3	24/76	FLKVPLFLGMLGAVLWVNRPLR	F1MGI1	2235.33
0.999999	1	10ul_Azm_Lac1_28dec18_RD1_01_483.02695.02695.2	1936-12-01	EVAAGSQDSLLDSGGGGGRGR	G3N2Z9	1659.78
0.999999	1	10ul_Azm_Lac1_28dec18_RD1_01_483.02699.02699.3	24/84	LVFYRGQVDQPANVPDSILLEAKE	L8IP97	2458.29
0.999999	1	10ul_Azm_Lac1_28dec18_RD1_01_483.02718.02718.2	13/24	SAVASLAAAWPQLHQ	E1BN25	1333.71
0.999999	1	10ul_Azm_Lac1_28dec18_RD1_01_483.02725.02725.2	2024-11-01	LGLHDLRKKMSIIPQ	L8HSZ8	1506.87
0.999999	1	10ul_Azm_Lac1_28dec18_RD1_01_483.02734.02734.2	2028-12-01	EIKIADMPLHSPLSRYQ	A8SMG2	1755.93
0.999999	1	10ul_Azm_Lac1_28dec18_RD1_01_483.02740.02740.3	22/80	PMASADLLSSSLFANIPGYKLGC	E1BNN7	2170.1
0.999999	1	10ul_Azm_Lac1_28dec18_RD1_01_483.02742.02742.3	27/92	RILQVSTAEVADAASYMCVAENPAGS	E1B9K4	2466.14
0.999999	1	10ul_Azm_Lac1_28dec18_RD1_01_483.02752.02752.3	19/80	NPSRYISGLSKWVRQLIQHHSTF	F1MMS0	2492.34
0.999999	1	10ul_Azm_Lac1_28dec18_RD1_01_483.02764.02764.2	2028-11-01	AAVATPDQEGLITNMMA	L8HPT7	1621.73
0.999999	1	10ul_Azm_Lac1_28dec18_RD1_01_483.02767.02767.3	23/80	AHVQTQHPHYSREELNSMTLGEV	Q32L32	2492.15
0.999999	1	10ul_Azm_Lac1_28dec18_RD1_01_483.02773.02773.2	2026-11-01	SGLLGLFQDQNPLFR-	Q32KX0	1616.87
0.999999	1	10ul_Azm_Lac1_28dec18_RD1_01_483.02781.02781.2	2026-10-01	SVARLIDPPELDTHML	E1B955	1621.81
0.999999	1	10ul_Azm_Lac1_28dec18_RD1_01_483.02796.02796.3	15/72	KVFEIRNTEDLTEEWLREKLG	P60984	2419.24
0.999999	1	10ul_Azm_Lac1_28dec18_RD1_01_483.02800.02800.3	22/104	PKNVHQRPAVALLCGPHVKGAQGISCGRH	E1BEA2	2909.53
0.999999	1	10ul_Azm_Lac1_28dec18_RD1_01_483.02803.02803.3	22/108	AVLAVGHPLAPSVSSSLASSLASSTGSGGS	F1MNI6	2495.29
0.999999	1	10ul_Azm_Lac1_28dec18_RD1_01_483.02809.02809.3	24/80	TGEKPYKCKVCGKAFAQKSNAID	L8HLJ5	2383.21
0.999999	1	10ul_Azm_Lac1_28dec18_RD1_01_483.02811.02811.2	14/34	QEPRAVGAPGPGLSPLGPPK	G3N290	1667.9
0.999999	1	10ul_Azm_Lac1_28dec18_RD1_01_483.02812.02812.3	30/120	GGMGPGLPGPVLPLNLAKNPLLPSPFGAGGLGL	E1BKE4	2907.6
0.999999	1	10ul_Azm_Lac1_28dec18_RD1_01_483.02820.02820.2	14/30	VSPGLSRTIPTATLDYGE	E1B8L8	1647.85
0.999999	1	10ul_Azm_Lac1_28dec18_RD1_01_483.02830.02830.2	1938-11-01	PPGKRGPPGPAGPEGRQGEKGA	G3MZI7	1928
0.999999	1	10ul_Azm_Lac1_28dec18_RD1_01_483.02835.02835.2	2028-11-01	RGRRSAGQFPQSPQPVK	A6QLQ7	1610.83
0.999999	1	10ul_Azm_Lac1_28dec18_RD1_01_483.02852.02852.2	16/28	PPMVLSGALESVRLLKG	Q3ZC31	1611.94
0.999999	1	10ul_Azm_Lac1_28dec18_RD1_01_483.02859.02859.2	2028-12-01	LQAKKRPQKPFIIYEGD	A6QQD5	1802.02
0.999999	1	10ul_Azm_Lac1_28dec18_RD1_01_483.02865.02865.3	22/80	ELPELLKQFTKAAIRSQPQDLIQ	Q3T064	2408.38
0.999999	1	10ul_Azm_Lac1_28dec18_RD1_01_483.02886.02886.3	17/96	SAVKLVGPEEALTPGEARDMAMDICRQ	L8ISJ0	2728.33
0.999999	1	10ul_Azm_Lac1_28dec18_RD1_01_483.02888.02888.3	30/80	ERLELQQGAGGQGGGGGGLSHED	A6QLV1	1963.95
0.999999	1	10ul_Azm_Lac1_28dec18_RD1_01_483.02896.02896.3	25/92	RVEIPHLDGHASPGADGQERVSEIIS	P42917	2525.25
0.999999	1	10ul_Azm_Lac1_28dec18_RD1_01_483.02900.02900.3	24/84	FTAGAELPGPGAELGAMPPGLKPT	E1BDB1	2030.05
0.999999	1	10ul_Azm_Lac1_28dec18_RD1_01_483.02901.02901.3	21/84	QISPVSDMTSTGLFQDKQEGKSTD	F1N1S2	2355.13
0.999999	1	10ul_Azm_Lac1_28dec18_RD1_01_483.02902.02902.3	23/104	GPPMMDGAMGYVQPPPPPYPGPMEPPVSG	E1BGX4	2867.27
0.999999	1	10ul_Azm_Lac1_28dec18_RD1_01_483.02911.02911.2	14/30	PGIRFCGGNVSAVPTFYS	L8IUH1	1743.84
0.999999	1	10ul_Azm_Lac1_28dec18_RD1_01_483.02922.02922.3	34/128	NHSGGGGSGGGGGSSGAPSGGGGGSNHSGGGGGPG	A6QQZ8	2420.97
0.999999	1	10ul_Azm_Lac1_28dec18_RD1_01_483.02925.02925.3	17/100	VSKDLERQKGDQMAQKSQAAQMMQDMER	E1BIQ4	3059.34
0.999999	1	10ul_Azm_Lac1_28dec18_RD1_01_483.02937.02937.3	23/76	LLLLGSCTISHLHSMMYVLLMS	F1N7J1	2334.16
0.999999	1	10ul_Azm_Lac1_28dec18_RD1_01_483.02941.02941.2	1932-09-01	QLNSVERYDVETETWTFVA	A7MBG4	2086.98
0.999999	1	10ul_Azm_Lac1_28dec18_RD1_01_483.02947.02947.2	2024-11-01	ASVVHTLLQKAPGVS	G3N1N2	1347.79
0.999999	1	10ul_Azm_Lac1_28dec18_RD1_01_483.02959.02959.3	24/88	GVKGRDLICIQSVDGMLMVFEQESY	L8IXK9	2653.29
0.999999	1	10ul_Azm_Lac1_28dec18_RD1_01_483.02964.02964.3	23/96	AGVSRDARTKVDRTPLHMAASEGHASL	Q1RMI3	2664.32
0.999999	1	10ul_Azm_Lac1_28dec18_RD1_01_483.02967.02967.2	1930-10-01	KTGTTQANGQLPQATQSM	Q3MHM0	1601.76
0.999999	1	10ul_Azm_Lac1_28dec18_RD1_01_483.02972.02972.3	25/104	GAGSGPASTGGAQAASVITYTAPPRPPKK	L8IZC2	2509.29
0.999999	1	10ul_Azm_Lac1_28dec18_RD1_01_483.02977.02977.3	24/72	LSERQQVALLMQMTAEESANS	E1BAT5	2166.99
0.999999	1	10ul_Azm_Lac1_28dec18_RD1_01_483.02986.02986.2	2028-11-01	QERNLLQALRHPKAVAF	F1MN15	1715
0.999999	1	10ul_Azm_Lac1_28dec18_RD1_01_483.03004.03004.3	27/100	PGGVPGGVFFPGAGLGGLGVGGLGPGVK	P04985	2151.15
0.999999	1	10ul_Azm_Lac1_28dec18_RD1_01_483.03024.03024.3	27/108	GVLQMYSDSLLTLPAIVGIGGGGGLLLLVL	E1BFR4	2784.57
0.999999	1	10ul_Azm_Lac1_28dec18_RD1_01_483.03026.03026.2	13/22	RPTLSDGIIGEHSL	G3X806	1224.6
0.999999	1	10ul_Azm_Lac1_28dec18_RD1_01_483.03029.03029.3	26/120	VGNVQAGDSVLIHAGASGVGTAAIQLARMAGAT	Q0VC75	2862.48
0.999999	1	10ul_Azm_Lac1_28dec18_RD1_01_483.03044.03044.3	19/72	TSSPPLVMLGLGLATVMTLTL	P48830	1900.04
0.999999	1	10ul_Azm_Lac1_28dec18_RD1_01_483.03051.03051.3	26/88	VSTLPTVPSSTDLEVGETAMEVDTP	F1MBJ1	2394.1
0.999999	1	10ul_Azm_Lac1_28dec18_RD1_01_483.03054.03054.3	20/64	MKGKRLTLKIMVRKPGAPV	L8IS53	1892.19
0.999999	1	10ul_Azm_Lac1_28dec18_RD1_01_483.03056.03056.3	22/100	VADKPAWEAEKTTESRSERYQNGTDAFF	A4IFL8	2986.37
0.999999	1	10ul_Azm_Lac1_28dec18_RD1_01_483.03085.03085.3	21/100	TAQEAEANVLVPREVLRIQGSNVEAAEP	Q6H236	2791.45
0.999999	1	10ul_Azm_Lac1_28dec18_RD1_01_483.03094.03094.2	1932-12-01	PGDLAPHLMITGGSSLQSS	F1MM81	1698.82
0.999999	1	10ul_Azm_Lac1_28dec18_RD1_01_483.03103.03103.3	24/64	GCPAVAGEEEIDGYETDHQ	F1N544	1890.76
0.999999	1	10ul_Azm_Lac1_28dec18_RD1_01_483.03113.03113.3	26/104	SLSPFAMDKKAVPGGGMPNMGQQQAPQVQ	E1B8D6	2815.35
0.999999	1	10ul_Azm_Lac1_28dec18_RD1_01_483.03114.03114.2	1942-09-01	SLHSPLGGYNSDYSGLSHSAFSSG	E1BMR6	2282.02
0.999999	1	10ul_Azm_Lac1_28dec18_RD1_01_483.03117.03117.3	24/72	WRRRRGEAAVGASLRDQNHKQ	L8IX58	2176.18
0.999999	1	10ul_Azm_Lac1_28dec18_RD1_01_483.03123.03123.2	13/38	TLAVDGAGGKSQVSSLCVSLVV	L8HQX3	1946.01
0.999999	1	10ul_Azm_Lac1_28dec18_RD1_01_483.03138.03138.2	14/40	APGELGAPGSAGVAGPAGAIGPQ	Q8MHZ9	1701.87
0.999999	1	10ul_Azm_Lac1_28dec18_RD1_01_483.03150.03150.3	19/52	KLVYCICHLLGMMSCC	A6QQX6	1755.76
0.999999	1	10ul_Azm_Lac1_28dec18_RD1_01_483.03151.03151.2	1932-12-01	PAPAEAPPLPAAPPRRSIL	Q08DA0	1709.96
0.999999	1	10ul_Azm_Lac1_28dec18_RD1_01_483.03168.03168.2	17/30	PGEPGLPGPPGLLGLPGL	L8HPG1	1426.78
0.999999	1	10ul_Azm_Lac1_28dec18_RD1_01_483.03194.03194.2	2024-12-01	PKLLAKILNMSSGRC	Q2HJD7	1429.84
0.999999	1	10ul_Azm_Lac1_28dec18_RD1_01_483.03195.03195.2	13/30	QGLRGITGVAGEKGEKGA	F1MND9	1527.84
0.999999	1	10ul_Azm_Lac1_28dec18_RD1_01_483.03201.03201.2	2028-11-01	EVADGLPPDATELHKEA	G3N2D0	1590.79
0.999999	1	10ul_Azm_Lac1_28dec18_RD1_01_483.03204.03204.3	23/96	RRRAENSTAKPFARTEIRLPGALALGR	F1MVC9	2694.5
0.999999	1	10ul_Azm_Lac1_28dec18_RD1_01_483.03213.03213.2	1930-11-01	PASAPNTEGVKSSSVMSS	L8J0H3	1550.72
0.999999	1	10ul_Azm_Lac1_28dec18_RD1_01_483.03215.03215.2	2026-12-01	PRDNRVVGSARARPSQ	Q2NL05	1539.83
0.999999	1	10ul_Azm_Lac1_28dec18_RD1_01_483.03227.03227.2	2028-11-01	FSGKLLTDRTRLQETKL	Q3ZBQ1	1744.98
0.999999	1	10ul_Azm_Lac1_28dec18_RD1_01_483.03236.03236.2	14/30	EALSGLRAASAVETSAMG	G3MZZ8	1549.78
0.999999	1	10ul_Azm_Lac1_28dec18_RD1_01_483.03258.03258.3	23/92	HTQGAGRSGQNLLGQASATSHIYQGP	F1N215	2401.17
0.999999	1	10ul_Azm_Lac1_28dec18_RD1_01_483.03266.03266.2	2020-12-01	HCELLREFYRMKS	G3X6J9	1543.76
0.999999	1	10ul_Azm_Lac1_28dec18_RD1_01_483.03289.03289.2	2026-11-01	DSGGPLMCKDSVENSY	G5E5C6	1495.63
[truncated: 5,367 more rows]
