# Supplementary material for: Peptide profiling in cow urine reveals molecular signature of physiology-driven pathways and in-silico predicted bioactive properties
Source: Sci Rep. 2021 Jun 14;11:12427. doi: 10.1038/s41598-021-91684-4 (PMC8203733; doi:10.1038/s41598-021-91684-4)
Supplement: Supplementary file 2 — Supplementary Information. [file 41598_2021_91684_MOESM2_ESM.xlsx]

## Sheet: cover
		Comprehensive profiling of urinary peptides in cow reveals physiology specific signatures and several bioactive properties
		Rohit Kumar, Syed Azmal Ali, Sumit Kumar Singh, Vanya Bhushan, Jai Kumar Kaushik, Ashok Kumar Mohanty, and Sudarshan Kumar
		Supplementary table 2: Peptide sequences with different bioactive properties.

## Sheet: ANTIINFLAMMATORY
PEPTIDE	SVM SCORE	PREDICTION	HYDROPHOBICITY	HYDROPATHICITY	HYDROPHILLICITY	CHARGE	MOL. WT.	N TERMINAL 10 AA
RATLKAGDCDCQC	1.17916	Antiinflammatory	-0.3	-0.39	0.46	0	1383.74	RATLKAGDCD
ASSTHGRNFVSFR	1.11269	Antiinflammatory	-0.26	-0.58	-0.06	2.5	1465.76	ASSTHGRNFV
VPAPGSGVSFH	0.954535	Antiinflammatory	0.11	0.38	-0.54	0.5	1054.32	VPAPGSGVSF
CRHKMQAASALIGGLAGEKERW	1.301	Antiinflammatory	-0.2	-0.44	0.22	2.5	2413.14	CRHKMQAASA
AASVEMWLERVCGHLGLGVQEPHR	0.955322	Antiinflammatory	-0.1	-0.08	-0.09	0	2675.45	AASVEMWLER
DGASRVLYGNRGNNRASRAEL	1.10501	Antiinflammatory	-0.38	-1.07	0.49	2	2276.75	DGASRVLYGN
VKARLIKMGHLNSMNIF	1.23914	Antiinflammatory	-0.08	0.32	-0.3	3.5	1972.71	VKARLIKMGH
QQVNLQSLVGRPQG	1.46134	Antiinflammatory	-0.22	-0.66	-0.16	1	1523.94	QQVNLQSLVG
LIRVLRAFTSSVPLLPG	1.24495	Antiinflammatory	0.03	1.05	-0.52	2	1839.51	LIRVLRAFTS
EEFQPDLVVLSGLHMMEGQ	0.969237	Antiinflammatory	-0.03	-0.05	-0.07	-3.5	2159.76	EEFQPDLVVL
DENLLRNAEYEA	1.41688	Antiinflammatory	-0.34	-1.3	0.71	-3	1436.66	DENLLRNAEY
LVKVVERELISKHMKTIVEM	1.27488	Antiinflammatory	-0.13	0.29	0.23	1.5	2383.27	LVKVVERELI
LGLSQDPHTQVLL	1.09028	Antiinflammatory	-0.01	0.17	-0.45	-0.5	1420.84	LGLSQDPHTQ
CVANHMRTVENMLH	1.23553	Antiinflammatory	-0.16	-0.13	-0.28	1	1655.15	CVANHMRTVE
GLPTSASFTLDDDVFA	0.904369	Antiinflammatory	0.02	0.34	-0.14	-3	1655.99	GLPTSASFTL
TMTTGEALNNNTGA	0.968492	Antiinflammatory	-0.12	-0.59	-0.15	-1	1394.68	TMTTGEALNN
QTLDCLHYWKV	1.04255	Antiinflammatory	-0.1	-0.25	-0.59	0.5	1405.8	QTLDCLHYWK
LLLQYVVKSFDRSTK	1.80593	Antiinflammatory	-0.18	-0.02	-0.05	2	1797.35	LLLQYVVKSF
RRLARLAGGQTSQ	1.46628	Antiinflammatory	-0.4	-0.89	0.36	3	1413.79	RRLARLAGGQ
PCHGGDMSQNSGSE	1.31048	Antiinflammatory	-0.22	-1.29	0.32	-1.5	1405.63	PCHGGDMSQN
WEEATPTVLLAEAQKGKE	1.0447	Antiinflammatory	-0.16	-0.69	0.41	-2	2000.5	WEEATPTVLL
ALPSILQRILQDPVYGKG	1.15564	Antiinflammatory	-0.07	0.08	-0.2	1	1968.61	ALPSILQRIL
KLSRTPKCA	0.915565	Antiinflammatory	-0.41	-0.81	0.62	3	1003.34	KLSRTPKCA
DAEVLILPKKHKK	0.999361	Antiinflammatory	-0.28	-0.72	0.78	2.5	1519.06	DAEVLILPKK
SAQDSKMDYKRRFLLGGSKQKV	1.27535	Antiinflammatory	-0.38	-1.13	0.62	4	2543.26	SAQDSKMDYK
YFTQGLGLNLEN	1.10785	Antiinflammatory	-0.02	-0.22	-0.58	-1	1368.7	YFTQGLGLNL
AHVEAVCIAWFTMEY	0.934269	Antiinflammatory	0.14	0.83	-0.78	-1.5	1770.26	AHVEAVCIAW
ALLTSVVFVGMMS	1.38959	Antiinflammatory	0.27	1.99	-1.04	0	1354.88	ALLTSVVFVG
EQQKRLSSLSDPVSERRAGE	0.904807	Antiinflammatory	-0.47	-1.5	1	0	2272.74	EQQKRLSSLS
LMQVEREKAILLANLQESQ	1.3846	Antiinflammatory	-0.19	-0.23	0.17	-1	2213.88	LMQVEREKAI
LKDTCGANAKQSRDCF	0.948385	Antiinflammatory	-0.33	-0.81	0.5	1	1757.18	LKDTCGANAK
VGPYKCKQCDIVTL	1.00736	Antiinflammatory	-0.09	0.21	-0.15	1	1567.1	VGPYKCKQCD
AGYCSFHSPMVCRL	0.980703	Antiinflammatory	-0.02	0.49	-0.63	1.5	1571.05	AGYCSFHSPM
CCLGVHHRQED	1.0113	Antiinflammatory	-0.3	-0.8	0.26	0	1296.6	CCLGVHHRQE
LGAWLLTANGSEMHKHV	0.907638	Antiinflammatory	0	0.04	-0.44	1	1864.42	LGAWLLTANG
FYVLTLIGNILIVITIIDDHH	1.02111	Antiinflammatory	0.22	1.41	-0.93	-1	2423.25	FYVLTLIGNI
LSIALGTLFYLLQAVSGESGYAE	1.10387	Antiinflammatory	0.13	0.8	-0.62	-2	2403.08	LSIALGTLFY
FVHTSFHGVGHDYVQLAFQVFG	0.923373	Antiinflammatory	0.1	0.43	-0.85	0.5	2493.12	FVHTSFHGVG
EEPGTNSTEATVTAIMTTAISKNKTKEYKVVGMYSDGINVL	1.03636	Antiinflammatory	-0.12	-0.32	0.09	-1	4393.58	EEPGTNSTEA
VRNGGRVQLVARLVSRE	1.21425	Antiinflammatory	-0.32	-0.23	0.33	3	1909.48	VRNGGRVQLV
LQTQNQSITYTGCLTQICFVLVFASLESSLLA	1.50371	Antiinflammatory	0.06	0.8	-0.75	-1	3493.55	LQTQNQSITY
ESLKLSEVDEDGNL	1.19318	Antiinflammatory	-0.23	-0.81	0.85	-4	1547.84	ESLKLSEVDE
PNMSVGFTAVLTYSSAWEAR	1.44492	Antiinflammatory	-0.02	0.14	-0.47	0	2187.73	PNMSVGFTAV
TQAFCSLQGGSFDVA	1.42492	Antiinflammatory	0.02	0.41	-0.45	-1	1530.88	TQAFCSLQGG
GDHILKIGGTN	1.21521	Antiinflammatory	-0.05	-0.29	-0.01	0.5	1124.44	GDHILKIGGT
QNLMSNILSQSSLVGYIEEAIS	1.47812	Antiinflammatory	-0.01	0.28	-0.37	-2	2397.04	QNLMSNILSQ
YLGELVRLILVKMAKEGLLFEGR	1.09829	Antiinflammatory	-0.04	0.54	-0.05	1	2648.62	YLGELVRLIL
GGGDYLKKPGGVGEA	0.93509	Antiinflammatory	-0.09	-0.69	0.39	0	1404.77	GGGDYLKKPG
HQISTPELSFLDHNTLKVLE	1.14735	Antiinflammatory	-0.11	-0.29	-0.09	-1	2321.93	HQISTPELSF
GLALGAHANGLDSPPMFAG	1.06836	Antiinflammatory	0.1	0.39	-0.43	-0.5	1796.31	GLALGAHANG
LLTMATTSDKLASR	1.1198	Antiinflammatory	-0.16	0.09	0.05	1	1507.96	LLTMATTSDK
GKVFLTVPSLSSTAEE	1.34463	Antiinflammatory	-0.02	0.24	-0.03	-1	1665.1	GKVFLTVPSL
LLSQSSWHPLSPE	1.06657	Antiinflammatory	-0.07	-0.47	-0.38	-0.5	1480.83	LLSQSSWHPL
AGLSAARDRLVESLAQQATEAMPPV	1.16593	Antiinflammatory	-0.12	0	0.12	-1	2582.28	AGLSAARDRL
LCCTLSTSGGLLLEAAFRGQGGVP	1.1314	Antiinflammatory	0.05	0.69	-0.42	0	2351.1	LCCTLSTSGG
DLGRLLSGGRGHRG	1.02518	Antiinflammatory	-0.3	-0.83	0.46	2.5	1450.84	DLGRLLSGGR
LVTSILEVYTSQE	0.958764	Antiinflammatory	0.01	0.44	-0.36	-2	1481.86	LVTSILEVYT
FRLHVGVLQKGSVGLV	0.95478	Antiinflammatory	0.04	0.87	-0.49	2.5	1709.33	FRLHVGVLQK
VCDLIMTAIKRNGADYRDMILKQVVNQ	1.12072	Antiinflammatory	-0.17	0	0.04	1	3109.1	VCDLIMTAIK
LAILSVLLAVLLAALLALLIFTWYDT	1.60469	Antiinflammatory	0.34	2.28	-1.26	-1	2830.95	LAILSVLLAV
PNKEYVIDDISLLNLLKGLCLKYL	1.74039	Antiinflammatory	-0.04	0.32	-0.19	0	2778.73	PNKEYVIDDI
LARLSSSSSPQLLARKADPGQ	1.07563	Antiinflammatory	-0.24	-0.5	0.25	2	2182.76	LARLSSSSSP
FVADKGAGNRVSLAALKKAVATRGYNMT	1.12871	Antiinflammatory	-0.14	-0.01	0.03	4	2910.79	FVADKGAGNR
GLVRGLKAGVLSQADYLNLVQCETLEDLK	1.31553	Antiinflammatory	-0.09	0.16	0	-1	3147.11	GLVRGLKAGV
LLTLDMLTVKVGEPKGYPPEDIFSLVGKKVL	1.11225	Antiinflammatory	-0.02	0.31	-0.04	0	3401.6	LLTLDMLTVK
LTTFDFSQYMKLDIAAVRALNLFQGS	0.954829	Antiinflammatory	-0.03	0.35	-0.41	0	2950.79	LTTFDFSQYM
FTALSVTHKSTQASGHR	0.992048	Antiinflammatory	-0.2	-0.52	-0.11	3	1828.26	FTALSVTHKS
AKELVEIAVPENLVGAILGKGGKT	1.28559	Antiinflammatory	0	0.37	0.12	0	2407.23	AKELVEIAVP
PTLWEEQRQQRMTVAFEFEEKKEDDENAGKVKDH	0.949508	Antiinflammatory	-0.41	-1.7	0.94	-3.5	4150.02	PTLWEEQRQQ
GNQEVANFYCDIASLLKLSCSDTHFNVKMMYLGA	1.14475	Antiinflammatory	-0.04	0.17	-0.35	-0.5	3784.86	GNQEVANFYC
VTLLLSSKTEMQNMIELSRRRFETANLDIP	0.984609	Antiinflammatory	-0.21	-0.25	0.15	0	3507.54	VTLLLSSKTE
VPVSEGTPILEEASLAGMPIQE	1.41265	Antiinflammatory	0.03	0.23	0	-4	2267.91	VPVSEGTPIL
LVELLKSSVAMQEQMLGGKGFLVIGY	1.27781	Antiinflammatory	0.07	0.7	-0.39	0	2811.82	LVELLKSSVA
AGNKIYTMAADKTISKLMTEY	1.1048	Antiinflammatory	-0.12	-0.29	0.01	1	2350.05	AGNKIYTMAA
AFPNIEKVSKITSPVLIIHGTEDEVIDFSHGLALYE	1.21198	Antiinflammatory	0	0.22	-0.11	-3	3984.09	AFPNIEKVSK
LAIDSGSSVSSRH	1.18289	Antiinflammatory	-0.15	-0.1	0.11	0.5	1315.58	LAIDSGSSVS
VVILCSLKSCSSEGQRK	1.54894	Antiinflammatory	-0.19	0.15	0.18	2	1837.43	VVILCSLKSC
LDAPSFAYLKMGDLYYY	1.1106	Antiinflammatory	0.02	0.05	-0.59	-1	2030.56	LDAPSFAYLK
MAYTGFRRLQADINCMRDL	1.10608	Antiinflammatory	-0.24	-0.27	0.01	1	2274.93	MAYTGFRRLQ
VQMYFIHTFSAIESGVLVAMAFDRVV	1.19342	Antiinflammatory	0.12	1.12	-0.69	-0.5	2931.85	VQMYFIHTFS
FLHAILIMVQATTLNVAFNSH	1.14047	Antiinflammatory	0.14	1.08	-0.99	1	2341.1	FLHAILIMVQ
RNVALLLLLSLSLEQTSASP	1.57199	Antiinflammatory	-0.01	0.7	-0.39	0	2125.8	RNVALLLLLS
RYCMHQHLKVATGK	1.01369	Antiinflammatory	-0.27	-0.74	-0.04	4	1672.21	RYCMHQHLKV
CSSHLISVTLYYGSILY	1.16842	Antiinflammatory	0.13	0.92	-1.06	0.5	1919.48	CSSHLISVTL
SLSKRLCLTKWESS	1.30808	Antiinflammatory	-0.27	-0.48	0.21	2	1638.11	SLSKRLCLTK
CVAELGELGLVQFKDLNVKESRFQRK	0.97293	Antiinflammatory	-0.23	-0.35	0.37	1	3007.9	CVAELGELGL
SGTLLAKKELEVASQ	0.983829	Antiinflammatory	-0.14	-0.12	0.3	0	1574.03	SGTLLAKKEL
AGPYYTTQTLDTRSRGRRRSKKQNA	1.14133	Antiinflammatory	-0.55	-1.85	0.65	6	2912.57	AGPYYTTQTL
KTEIVHTSSISVSDLENQVSRMERALSLGSLEPKL	1.74764	Antiinflammatory	-0.19	-0.26	0.27	-0.5	3855.91	KTEIVHTSSI
QKLKITGSFKETGTSFLGFQL	0.918672	Antiinflammatory	-0.08	-0.13	-0.14	2	2331.04	QKLKITGSFK
FAVLGFKANIMNEKCVVENAE	1.08714	Antiinflammatory	-0.03	0.34	-0.06	-1	2327.02	FAVLGFKANI
ASPSRAQMEVHVSASLTKLRAVEGA	1.05398	Antiinflammatory	-0.16	-0.06	0.14	1.5	2596.31	ASPSRAQMEV
GKYYKEATLTVDQVSSLPALRV	1.24739	Antiinflammatory	-0.14	-0.13	-0.02	1	2439.13	GKYYKEATLT
GKTLQDTLSNAVIYY	1.05641	Antiinflammatory	-0.07	-0.1	-0.41	0	1686.12	GKTLQDTLSN
TGTLIACYVMKHYRFTHA	0.935858	Antiinflammatory	-0.04	0.19	-0.65	3	2112.76	TGTLIACYVM
EEGSPACQAGLKAGDLITHIN	1.23216	Antiinflammatory	-0.07	-0.21	0.1	-1.5	2124.67	EEGSPACQAG
LRLGSKSVLSTCKAPDQP	1.34541	Antiinflammatory	-0.22	-0.34	0.24	2	1900.48	LRLGSKSVLS
RNLSGGVLMGLMLSRINQEANP	1.39851	Antiinflammatory	-0.12	-0.06	-0.15	1	2371.12	RNLSGGVLMG
LQPATPRSKKSFELLPENAG	1.14302	Antiinflammatory	-0.23	-0.8	0.34	1	2183.78	LQPATPRSKK
RVADLLQHITQMKCAEGYGFKEEYESFFEGQSA	0.930741	Antiinflammatory	-0.16	-0.56	0.14	-2.5	3813.72	RVADLLQHIT
SEFNLLGKIGGDSGLSVRGKQ	1.22968	Antiinflammatory	-0.15	-0.37	0.24	1	2162.76	SEFNLLGKIG
QLLAGADAQLLKALKLERDTGGYAY	1.82121	Antiinflammatory	-0.11	-0.1	0	0	2679.45	QLLAGADAQL
PLVLSMLTRNNFLPNADMETR	1.25572	Antiinflammatory	-0.17	-0.2	-0.1	0	2433.15	PLVLSMLTRN
NILLARLGLAEGTSPFIKLSDPGV	1.89503	Antiinflammatory	0.02	0.54	-0.22	0	2482.29	NILLARLGLA
SGTGTTYSQSSA	0.953464	Antiinflammatory	-0.14	-0.76	-0.22	0	1146.29	SGTGTTYSQS
FIVKREHALTSGTIKAMLSGPGQFAEN	1.06433	Antiinflammatory	-0.08	-0.06	-0.07	1.5	2903.76	FIVKREHALT
MWCPLRPLLLALLLASACRTLG	1.54792	Antiinflammatory	0.08	1.26	-0.76	2	2412.39	MWCPLRPLLL
TLLGVLTHGELDNGRGF	0.955521	Antiinflammatory	-0.03	0.06	-0.19	-0.5	1799.29	TLLGVLTHGE
SLSYGAIGVIVGHEFT	1.27808	Antiinflammatory	0.17	0.89	-0.69	-0.5	1650.11	SLSYGAIGVI
DSEQGGEDPGKLSHATLKN	1.27972	Antiinflammatory	-0.29	-1.46	0.74	-1.5	1983.36	DSEQGGEDPG
MCVFQGYQSTGLAQRSLFNLQIYAVL	1.35567	Antiinflammatory	0.02	0.54	-0.8	1	2951.86	MCVFQGYQST
AVRDVVSASLQQARARSLVFSILLARN	1.37408	Antiinflammatory	-0.15	0.49	-0.12	3	2941.82	AVRDVVSASL
KDRLRINRFAWPKILKISYKRSNFYL	1.20654	Antiinflammatory	-0.32	-0.71	0.14	7	3327.37	KDRLRINRFA
LQLPLCGHRRVDSFLCEVPAMIKLA	1.24725	Antiinflammatory	-0.06	0.57	-0.22	1.5	2810.81	LQLPLCGHRR
RLSCAFRSPVLCVNQVTEAVEEQDLV	1.07471	Antiinflammatory	-0.13	0.25	0.02	-2	2906.7	RLSCAFRSPV
PACYGGFDLYFILDKSG	1.21157	Antiinflammatory	0.06	0.29	-0.42	-1	1866.36	PACYGGFDLY
LPCVENLSGFVSAFL	1.28033	Antiinflammatory	0.17	1.27	-0.74	-1	1596.09	LPCVENLSGF
RLIVSCHSDGSYC	1.03125	Antiinflammatory	-0.12	0.17	-0.23	0.5	1439.8	RLIVSCHSDG
AGTECVLLSMMAFDRYVAICN	1.02264	Antiinflammatory	0.04	0.92	-0.49	-1	2308.04	AGTECVLLSM
PRGCPEILSHSVGMSESPVGPK	0.951695	Antiinflammatory	-0.12	-0.38	0.17	0.5	2264.92	PRGCPEILSH
LAYHPLENMVAFCAFGQNE	1.09375	Antiinflammatory	0.02	0.17	-0.53	-1.5	2154.72	LAYHPLENMV
LRVAGGANISQISEALSCYRNRSCFM	1.23066	Antiinflammatory	-0.15	0.12	-0.17	2	2847.65	LRVAGGANIS
VERSMSLTLQSTPIITLEPVE	1.14622	Antiinflammatory	-0.07	0.21	-0.07	-2	2344.04	VERSMSLTLQ
KAAGSSLLNKITNSLVLDIIKLAGVHTVT	1.25923	Antiinflammatory	0.02	0.68	-0.3	2.5	2978	KAAGSSLLNK
PFCCGCFESLYAEYCETCGEHIG	1.07218	Antiinflammatory	0	0.18	-0.32	-3.5	2562.19	PFCCGCFESL
EKSPGPSKATTIDALKKLQDVLNIENAK	0.994614	Antiinflammatory	-0.24	-0.74	0.55	1	3009.87	EKSPGPSKAT
VRLLIRRPECFGPAL	1.15959	Antiinflammatory	-0.14	0.44	-0.05	2	1740.36	VRLLIRRPEC
AVARDQSSVYLTLLMHETQPPSH	0.969059	Antiinflammatory	-0.14	-0.34	-0.2	0	2581.24	AVARDQSSVY
TMFGERAREHMILLFTRKDDLEGMDFCEYLKQAPTA	1.47902	Antiinflammatory	-0.2	-0.46	0.26	-1.5	4265.45	TMFGERAREH
SALLLEQAAHCFINMKSPMVRKYAFHMILAGHRFSKA	1.39977	Antiinflammatory	-0.06	0.25	-0.33	5.5	4219.63	SALLLEQAAH
EKMPIQEKEASKKEVILLAKMKHPNIVTFF	1.01549	Antiinflammatory	-0.16	-0.33	0.31	2.5	3528.74	EKMPIQEKEA
GSAPALFKILQSPALGLRG	0.974631	Antiinflammatory	0.03	0.53	-0.33	2	1896.55	GSAPALFKIL
MFIMISALQKTSLTGSISKRMSDV	1.05247	Antiinflammatory	-0.06	0.44	-0.19	2	2645.55	MFIMISALQK
SMELESVGLGGAAAFREVR	0.947887	Antiinflammatory	-0.09	0.2	0.19	-1	1979.51	SMELESVGLG
LSLLVKQKGPDFLVTEVENGGSLGS	1.00927	Antiinflammatory	-0.04	0.11	0	-1	2588.35	LSLLVKQKGP
WVDFYLLAHHVRQG	1.28965	Antiinflammatory	-0.03	0.01	-0.72	1	1741.2	WVDFYLLAHH
LYERMFKWLVARINR	0.963423	Antiinflammatory	-0.25	-0.25	-0.11	3	1995.64	LYERMFKWLV
SCRMHTCFDVYR	0.916847	Antiinflammatory	-0.3	-0.38	-0.1	1.5	1517.91	SCRMHTCFDV
FKELMYVFFMLKDAGLAPD	1.45881	Antiinflammatory	0.04	0.52	-0.28	-1	2235.96	FKELMYVFFM
LLLRKCCLTDENKLL	1.1522	Antiinflammatory	-0.19	0.29	0.13	1	1775.43	LLLRKCCLTD
KKNSPVLSLTADQM	1.1829	Antiinflammatory	-0.21	-0.48	0.19	1	1531.99	KKNSPVLSLT
FGQQANNSQLIMRIALGGLL	0.97725	Antiinflammatory	0	0.42	-0.56	1	2144.85	FGQQANNSQL
RIQNGQRNAMYTSQQSVENKVGGIPGW	1.41554	Antiinflammatory	-0.24	-1.02	-0.02	2	3019.77	RIQNGQRNAM
LRQIQELIISRLNQAVAN	1.39606	Antiinflammatory	-0.16	0.11	-0.17	1	2079.72	LRQIQELIIS
EALKHPWLSDPKLHSRLSTQK	1.2767	Antiinflammatory	-0.3	-1.11	0.31	3	2472.16	EALKHPWLSD
LHQDGGLLLNNPSALAMHECKCL	1.10661	Antiinflammatory	-0.05	0.1	-0.27	0	2478.26	LHQDGGLLLN
GYSSTLWIGLNDLDTSGGWQWSDNS	1.0327	Antiinflammatory	-0.07	-0.64	-0.38	-3	2760.26	GYSSTLWIGL
LPPLVEILTFSKEHYSIWMVLKNVSIVFTG	1.06044	Antiinflammatory	0.09	0.73	-0.63	0.5	3462.63	LPPLVEILTF
QFMKKLLTCNGVYLNPPPGQDHLLPE	0.92251	Antiinflammatory	-0.1	-0.42	-0.22	0.5	2953.88	QFMKKLLTCN
SLENGALQPSDLER	1.20597	Antiinflammatory	-0.26	-0.89	0.51	-2	1528.84	SLENGALQPS
LMLAAVRTLSGVCSSHRARATATLHA	1.03268	Antiinflammatory	-0.09	0.54	-0.3	4	2694.54	LMLAAVRTLS
WRNFVDTVRDTTAAQQA	0.909099	Antiinflammatory	-0.28	-0.76	0.06	0	1979.37	WRNFVDTVRD
YKELLAKRAELQKKVEELQRE	1.16219	Antiinflammatory	-0.44	-1.3	1.02	1	2602.35	YKELLAKRAE
FVAKVMQVLNADAIVVKLNSGDYKT	1.06027	Antiinflammatory	-0.03	0.43	-0.2	1	2724.59	FVAKVMQVLN
PQSDPVLKVTLAVSDLQKSL	0.914674	Antiinflammatory	-0.11	0.08	0.03	0	2138.79	PQSDPVLKVT
MLKIVHKAFKAQFPEIL	1.28443	Antiinflammatory	0	0.49	-0.25	2.5	2013.78	MLKIVHKAFK
RYCLDSLDQDCFDTL	1.04911	Antiinflammatory	-0.23	-0.37	0.19	-3	1807.18	RYCLDSLDQD
SVELQMLTNSCVKLQ	1.01567	Antiinflammatory	-0.1	0.27	-0.26	0	1693.24	SVELQMLTNS
QAVTELLHRNGASPDILARA	1.29232	Antiinflammatory	-0.15	-0.12	0.05	0.5	2132.7	QAVTELLHRN
SSVKTLKNLLGKSCEW	1.54135	Antiinflammatory	-0.18	-0.31	0.09	2	1793.35	SSVKTLKNLL
GVTHRISLVLRAEQ	1.00868	Antiinflammatory	-0.17	0.09	-0.02	1.5	1579.05	GVTHRISLVL
FPALTATESDG	0.99853	Antiinflammatory	-0.02	-0.09	0.02	-2	1108.31	FPALTATESD
PKGVLHTVGGYMLY	0.913229	Antiinflammatory	0.08	0.34	-0.74	1.5	1535.06	PKGVLHTVGG
QYQNALMASRMDKTPQS	1.07984	Antiinflammatory	-0.32	-1.17	0.14	1	1969.46	QYQNALMASR
DLVEKLKLLRYEE	0.930235	Antiinflammatory	-0.3	-0.63	0.77	-1	1648.13	DLVEKLKLLR
NTLAQALHLLSTLYG	1.0819	Antiinflammatory	0.07	0.57	-0.86	0.5	1615.1	NTLAQALHLL
AKLLDGSHQQHGFLSLTYTKAV	1.32929	Antiinflammatory	-0.08	-0.18	-0.29	2	2415.09	AKLLDGSHQQ
DLRMLKSPIKTISAHKTSV	1.41359	Antiinflammatory	-0.2	-0.2	0.22	3.5	2125.84	DLRMLKSPIK
AHGAALREKYAGQTQGLERPPHLHSKSKP	1.0046	Antiinflammatory	-0.29	-1.22	0.36	4.5	3166	AHGAALREKY
GGEVSALQAAETEIRRDIRQ	1.08604	Antiinflammatory	-0.3	-0.72	0.64	-1	2199.7	GGEVSALQAA
LLRSPSLGENCVAGLKERLWKL	1.01052	Antiinflammatory	-0.16	-0.04	0.07	2	2483.31	LLRSPSLGEN
AGFEPVVIENILEGDELRTDLKAVEAKVQ	1.35888	Antiinflammatory	-0.11	-0.05	0.38	-4	3184.05	AGFEPVVIEN
QVALENANAVSEGVVHEDL	1.18937	Antiinflammatory	-0.06	0.05	0.07	-3.5	1994.43	QVALENANAV
HGMLFAFIYLALQKRQILSEGKGEPLFSS	1.39373	Antiinflammatory	-0.02	0.2	-0.31	1.5	3282.32	HGMLFAFIYL
EKLKSLSLQQQQEGDNGDSSKSTETS	1.11442	Antiinflammatory	-0.38	-1.63	0.79	-2	2825.34	EKLKSLSLQQ
LGPLEMHENLENNKIGESPSAVK	0.940107	Antiinflammatory	-0.17	-0.75	0.36	-1.5	2507.17	LGPLEMHENL
ACPNLVGVETSHLELVESIWTYMPHVHILGKF	1.35984	Antiinflammatory	0.06	0.42	-0.54	-0.5	3621.74	ACPNLVGVET
TDSNKENETDEENTEVMIKGGGLKHVP	0.93391	Antiinflammatory	-0.29	-1.37	0.79	-3.5	2972.6	TDSNKENETD
EGRGGLRSGPAANPEWV	0.993714	Antiinflammatory	-0.19	-0.85	0.28	0	1753.15	EGRGGLRSGP
QHSLVIKWNSP	1.0657	Antiinflammatory	-0.11	-0.52	-0.45	1.5	1308.67	QHSLVIKWNS
DHAVLVVGYGFEGAD	1.03205	Antiinflammatory	0.09	0.44	-0.24	-2.5	1548.89	DHAVLVVGYG
TLSALPRGTPTSWVVMWGFRW	0.900841	Antiinflammatory	0	0.15	-0.75	2	2449.18	TLSALPRGTP
PALSSSPAHSGMMGINSYGSQ	0.940468	Antiinflammatory	-0.03	-0.24	-0.37	0.5	2079.59	PALSSSPAHS
NLALNAKGAILYAFEM	1.00616	Antiinflammatory	0.09	0.73	-0.56	0	1739.3	NLALNAKGAI
QQDSHAPLRDSRGGSFE	1.22533	Antiinflammatory	-0.38	-1.54	0.65	-0.5	1887.19	QQDSHAPLRD
LKDLGLRPKRTLRLVLWTAEEQG	1.25276	Antiinflammatory	-0.26	-0.49	0.31	2	2693.55	LKDLGLRPKR
PMPILSYPSIKEVYLICNT	1.14314	Antiinflammatory	0.05	0.48	-0.58	0	2181.92	PMPILSYPSI
LMMKLKEEDMAMNAQQDNILYQTVTG	1.18472	Antiinflammatory	-0.15	-0.43	0.04	-2	3016.92	LMMKLKEEDM
LAEALYGSELTCL	1.35272	Antiinflammatory	0.09	0.85	-0.43	-2	1382.78	LAEALYGSEL
FPDLCRDLENSSDQGIMNFGVS	1.22342	Antiinflammatory	-0.14	-0.34	0.1	-3	2444.99	FPDLCRDLEN
CEDGYFALEKSNYFGCQG	1.35448	Antiinflammatory	-0.11	-0.54	-0.07	-2	2031.45	CEDGYFALEK
RDPGAKALVFSTWQDVL	1.18067	Antiinflammatory	-0.1	-0.05	-0.08	0	1903.41	RDPGAKALVF
ELLKGVGFDELKGLPQT	1.16197	Antiinflammatory	-0.08	-0.18	0.21	-1	1844.41	ELLKGVGFDE
AGLTFLLAIACLWESV	1.37981	Antiinflammatory	0.27	1.77	-1	-1	1707.3	AGLTFLLAIA
PTYNTTLSEASLIGT	1.05362	Antiinflammatory	-0.02	-0.05	-0.4	-1	1567.93	PTYNTTLSEA
QLLKKNGGIVMVSLSMGVLQ	1.34661	Antiinflammatory	0.04	0.75	-0.45	2	2115.96	QLLKKNGGIV
DKAITVSSALQSGTVWVNCYSVV	0.987586	Antiinflammatory	0.02	0.6	-0.52	0	2428.09	DKAITVSSAL
AKQGLKKPVRGKQA	1.12871	Antiinflammatory	-0.41	-1.28	0.79	5	1509.04	AKQGLKKPVR
GVFIGHTDDQLQKEKE	0.98187	Antiinflammatory	-0.26	-1.14	0.62	-1.5	1844.26	GVFIGHTDDQ
APGEECLSSPSFVPQ	0.926604	Antiinflammatory	-0.05	-0.2	-0.01	-2	1547.9	APGEECLSSP
LSAQKDTLLARHG	1.1915	Antiinflammatory	-0.22	-0.42	0.17	1.5	1409.8	LSAQKDTLLA
PLLSVLLLPLLGGAQ	0.991671	Antiinflammatory	0.25	1.62	-0.94	0	1504.14	PLLSVLLLPL
LFANGIKFGFGSRHLPNRVGSGA	1.16734	Antiinflammatory	-0.06	0	-0.26	3.5	2403.09	LFANGIKFGF
HIGLHDLRKKLSVALQEPV	0.935893	Antiinflammatory	-0.15	-0.11	0.11	2	2153.86	HIGLHDLRKK
PGIEVLWTGPKVV	1.00558	Antiinflammatory	0.12	0.61	-0.45	0	1394.88	PGIEVLWTGP
YLERAAVAGLKANPCTS	1.15502	Antiinflammatory	-0.11	0.08	-0.08	1	1764.26	YLERAAVAGL
PQNLLINERGELKLADFGLARAKSVPTKTY	0.927382	Antiinflammatory	-0.2	-0.44	0.18	2	3344.33	PQNLLINERG
SDKIRTVQDALESLVARESVQ	0.980924	Antiinflammatory	-0.27	-0.41	0.52	-1	2344.91	SDKIRTVQDA
DIQNLGVGLPRADE	1.18885	Antiinflammatory	-0.17	-0.45	0.36	-2	1496.85	DIQNLGVGLP
ECKSFESTPSFEESERKQ	1.09099	Antiinflammatory	-0.43	-1.71	1.06	-2	2148.52	ECKSFESTPS
SSIAPKFLETLLTKHRSVS	1.29156	Antiinflammatory	-0.14	-0.03	0.01	2.5	2114.75	SSIAPKFLET
EYLGVAYAEKD	0.938528	Antiinflammatory	-0.12	-0.53	0.28	-2	1257.51	EYLGVAYAEK
SPQSAFLPGFGVKMLSTANMKS	1.19002	Antiinflammatory	-0.03	0.1	-0.3	2	2299.02	SPQSAFLPGF
LPLLHLAFRASSSQA	1.21773	Antiinflammatory	-0.01	0.55	-0.51	1.5	1611.09	LPLLHLAFRA
FSVLYTVPATIVIACYFYE	1.07986	Antiinflammatory	0.22	1.36	-1.12	-1	2199.86	FSVLYTVPAT
RWAEKLILSENSLTELHKDSF	1.38697	Antiinflammatory	-0.21	-0.6	0.28	-0.5	2517.15	RWAEKLILSE
PALPTDGSTGVELAPRSAEPGYLVTK	0.910117	Antiinflammatory	-0.09	-0.24	0.08	-1	2627.32	PALPTDGSTG
GTDCFLLLEGAKEYAMLH	1.18934	Antiinflammatory	0.01	0.31	-0.23	-1.5	2011.61	GTDCFLLLEG
KDLTGLKGRLIEVTEEELKKHN	0.983944	Antiinflammatory	-0.32	-1.03	0.84	0.5	2551.29	KDLTGLKGRL
SERSLRARLKALNTELALYKRGRR	0.956928	Antiinflammatory	-0.49	-1.04	0.73	6	2858.69	SERSLRARLK
FDIGELAAVELLLAGEHQQPHFPGLTRG	1.26745	Antiinflammatory	-0.01	0.05	-0.17	-2	3016.85	FDIGELAAVE
KSPEGQFTQLMTLPKTLQQQINHIM	0.978224	Antiinflammatory	-0.16	-0.6	-0.21	1.5	2912.83	KSPEGQFTQL
LMSISNAGSGLLSHSSTLTGTPL	1.29034	Antiinflammatory	0.05	0.47	-0.53	0.5	2244.9	LMSISNAGSG
EAQKLEQSSLVPGHL	1.14983	Antiinflammatory	-0.14	-0.49	0.14	-0.5	1636.07	EAQKLEQSSL
VTPLLKLSCSDTHLNEVMILTEAAL	1.34036	Antiinflammatory	0.02	0.69	-0.31	-1.5	2712.6	VTPLLKLSCS
SSAGLKAPHSMVAAFDYNPR	1.29044	Antiinflammatory	-0.12	-0.3	-0.09	1.5	2119.65	SSAGLKAPHS
VISGSSHTGNKLATQEFL	1.01007	Antiinflammatory	-0.06	-0.07	-0.22	0.5	1889.37	VISGSSHTGN
LDMELLHRQVLALQTQ	1.02298	Antiinflammatory	-0.13	0.06	-0.23	-0.5	1908.51	LDMELLHRQV
DNKLPKKTEQMLLSQVYATVIEA	1.10671	Antiinflammatory	-0.16	-0.35	0.14	0	2620.41	DNKLPKKTEQ
NSNVENLPPHIIRL	0.932102	Antiinflammatory	-0.15	-0.35	-0.16	0.5	1616.07	NSNVENLPPH
EDKTNLQDVIGASLQQLLAS	1.11957	Antiinflammatory	-0.13	-0.18	0.07	-2	2143.69	EDKTNLQDVI
KHKKKELSLESGVYSFEEE	1.2874	Antiinflammatory	-0.33	-1.36	0.92	-0.5	2267.8	KHKKKELSLE
LGLHDLRKKMSIIPQ	1.05565	Antiinflammatory	-0.18	-0.2	0.11	2.5	1749.39	LGLHDLRKKM
NPSRYISGLSKWVRQLIQHHSTF	0.972022	Antiinflammatory	-0.2	-0.62	-0.33	4	2755.49	NPSRYISGLS
ASVVHTLLQKAPGVS	1.30634	Antiinflammatory	0.03	0.59	-0.41	1.5	1506.99	ASVVHTLLQK
PKLLAKILNMSSGRC	0.937601	Antiinflammatory	-0.14	0.18	-0.01	3	1631.25	PKLLAKILNM
EALSGLRAASAVETSAMG	1.11302	Antiinflammatory	-0.03	0.41	0.03	-1	1721.16	EALSGLRAAS
RSGSKMLQKVVLPSYEEAVSL	1.34429	Antiinflammatory	-0.15	-0.08	0.11	1	2322.03	RSGSKMLQKV
LDVGCIWVTELRKNSPAGKSGKVRLRDEILSLNGQLMVG	1.14013	Antiinflammatory	-0.15	-0.06	0.12	2	4254.61	LDVGCIWVTE
TPRCGQGLRCYPNPGSELPLRALVHGEGTCE	1.42661	Antiinflammatory	-0.19	-0.56	0.09	0.5	3312.22	TPRCGQGLRC
DPVQNVVQVLEKQYLE	1.46121	Antiinflammatory	-0.16	-0.43	0.06	-2	1901.4	DPVQNVVQVL
GIGAATLQQTGDSLANEDSHDSDHSSEHA	1.18327	Antiinflammatory	-0.2	-0.98	0.36	-4.5	2951.36	GIGAATLQQT
HSGKYLCTVKTTLESLSADGD	1.25692	Antiinflammatory	-0.15	-0.39	0.17	-0.5	2225.76	HSGKYLCTVK
VASVENTVPCDTPICG	1.34564	Antiinflammatory	0.01	0.47	-0.19	-2	1605.03	VASVENTVPC
ECYLAACQKRDNWFC	1.09963	Antiinflammatory	-0.23	-0.46	-0.11	0	1850.31	ECYLAACQKR
HTHLLSTNSAYRQQ	1.17429	Antiinflammatory	-0.29	-1.16	-0.29	2	1656	HTHLLSTNSA
QFLNRDDIGIILL	1.09452	Antiinflammatory	0	0.68	-0.3	-1	1530.01	QFLNRDDIGI
QSRPLLLLGQLHHLHRVPWSHVRGKLQ	1.29182	Antiinflammatory	-0.19	-0.45	-0.29	6	3207.25	QSRPLLLLGQ
LPILIFPEGTCINNTSV	1.21529	Antiinflammatory	0.11	0.84	-0.65	-1	1831.42	LPILIFPEGT
QVKQYLSTTLANKHANQ	0.917134	Antiinflammatory	-0.26	-0.98	-0.14	2.5	1944.44	QVKQYLSTTL
LILVGGYGTRLRP	1.23788	Antiinflammatory	-0.03	0.48	-0.42	2	1414.92	LILVGGYGTR
VLDQFLCHVAKTGET	1.05522	Antiinflammatory	-0.05	0.25	-0.18	-0.5	1661.13	VLDQFLCHVA
KNQGIKKTLGSTRRGNDNGRKLRLGKQ	1.09894	Antiinflammatory	-0.52	-1.73	0.86	8	3024.91	KNQGIKKTLG
HLLKMGETSEICPEATDFL	1.02758	Antiinflammatory	-0.06	-0.02	0.08	-2.5	2134.73	HLLKMGETSE
QALGFHDASINNLIQAHLL	1.15739	Antiinflammatory	0.03	0.38	-0.62	0	2075.66	QALGFHDASI
MAASEQPQAGELLAKARRAFLEEFGAEPEL	1.07319	Antiinflammatory	-0.15	-0.35	0.36	-3	3261.1	MAASEQPQAG
KSGRPSLKLLAERILGIQVQQAEHCS	1.31598	Antiinflammatory	-0.2	-0.3	0.18	2.5	2862.75	KSGRPSLKLL
RVTSTGNMLSHVGHTILGMNTV	1.1846	Antiinflammatory	-0.03	0.23	-0.5	2	2326.04	RVTSTGNMLS
ASPLVVIPAIDKSSATVYIGSHSHRMIAV	0.99341	Antiinflammatory	0.04	0.68	-0.4	2	3020.97	ASPLVVIPAI
QPQLGRAVVIMVGGANEALH	1.03715	Antiinflammatory	0	0.38	-0.33	0.5	2060.72	QPQLGRAVVI
LRGILTDVTLLVGGQPLRA	1.1212	Antiinflammatory	-0.01	0.71	-0.31	1	1992.7	LRGILTDVTL
YIVRVLLDDPALGIG	1.07331	Antiinflammatory	0.1	1.03	-0.39	-1	1614.15	YIVRVLLDDP
ALLIYTEASDYIPDD	1.39344	Antiinflammatory	-0.02	0.03	-0.06	-4	1699.05	ALLIYTEASD
TSENLENPPQLGEE	1.30901	Antiinflammatory	-0.27	-1.57	0.64	-4	1556.81	TSENLENPPQ
LYREVTLENFGNL	1.25671	Antiinflammatory	-0.12	-0.19	-0.21	-1	1567.96	LYREVTLENF
EKQLEGVLSKETLGVTARQPEQR	1.3467	Antiinflammatory	-0.34	-1.06	0.66	0	2597.28	EKQLEGVLSK
GRDGNIMVWDTRCNK	0.970281	Antiinflammatory	-0.35	-1.08	0.4	1	1765.21	GRDGNIMVWD
LAAIAVAVMLANKDSL	1.22187	Antiinflammatory	0.14	1.47	-0.47	0	1600.18	LAAIAVAVML
ERVLENVQHYQE	1.18061	Antiinflammatory	-0.37	-1.48	0.42	-1.5	1543.84	ERVLENVQHY
TIARGLVGGLKNTLVHRNLPAILDWV	1.12477	Antiinflammatory	-0.01	0.48	-0.4	2.5	2827.79	TIARGLVGGL
SAFSCSRMEDGEQQVKIKSFREAHSQT	1.06568	Antiinflammatory	-0.33	-1.01	0.5	0.5	3087.77	SAFSCSRMED
EYYSFHESDLDLPEIGSGSMSSR	0.973351	Antiinflammatory	-0.18	-0.79	0.24	-3.5	2607.08	EYYSFHESDL
EETQRTFLKEVKVMRCLEHPNVLKFL	0.957668	Antiinflammatory	-0.24	-0.39	0.27	1.5	3189.2	EETQRTFLKE
NIDLVAQRGERLELLIDKTEN	1.27039	Antiinflammatory	-0.26	-0.56	0.54	-2	2440.08	NIDLVAQRGE
SMTAIRISPETLEQDGTVLLPDCHTEGQN	1.29784	Antiinflammatory	-0.15	-0.46	0.13	-3.5	3156.93	SMTAIRISPE
AMTGGIIFILAGLAALIACSWYGHQIVSD	1.11467	Antiinflammatory	0.22	1.31	-0.9	-0.5	2993	AMTGGIIFIL
VTYTLQPSATSVHVQQGPQTMVSS	1.07027	Antiinflammatory	-0.07	-0.16	-0.5	0.5	2547.2	VTYTLQPSAT
CTRESSSIAQSLFLVRKEK	1.29989	Antiinflammatory	-0.3	-0.41	0.43	2	2182.79	CTRESSSIAQ
RIAVAVVKGLTYLWS	0.980959	Antiinflammatory	0.08	1.05	-0.71	2	1676.26	RIAVAVVKGL
YTFTASFTQKVFPFF	1.41308	Antiinflammatory	0.08	0.45	-0.97	1	1831.3	YTFTASFTQK
LVDKSQALNVTAQQKWPLLRANSSG	1.43065	Antiinflammatory	-0.18	-0.41	-0.06	2	2725.48	LVDKSQALNV
FCWKSQLIMHQ	0.911294	Antiinflammatory	-0.05	-0.03	-0.78	1.5	1420.88	FCWKSQLIMH
KASQKIGFRLRNLLKLPKAHKWCIY	1.64396	Antiinflammatory	-0.23	-0.42	0.01	7.5	3013.09	KASQKIGFRL
LIARILKDTAIKSADNQVPPPVSAALQGL	1.19989	Antiinflammatory	-0.05	0.3	-0.08	1	3000.97	LIARILKDTA
GSLPRSSEQLLGHKEGPRDSVT	1.49751	Antiinflammatory	-0.29	-1.04	0.53	0.5	2350.9	GSLPRSSEQL
VVCEHSPFDGIVLVQCTEHLL	1.05532	Antiinflammatory	0.07	0.79	-0.46	-2	2339.05	VVCEHSPFDG
KTARIWDAQTGQCLQVLEGHT	1.06318	Antiinflammatory	-0.17	-0.5	-0.07	0.5	2355.98	KTARIWDAQT
DARLHTPMYYFLSHLAFVDLCY	1.15251	Antiinflammatory	0.01	0.37	-0.73	0	2676.42	DARLHTPMYY
EQPKEVLKAPGTSGLQLVAFHPGQKVC	1.01227	Antiinflammatory	-0.1	-0.26	0.02	1.5	2862.76	EQPKEVLKAP
FSTVQDDIGREKLKEVALGKRKSREALRAQ	1.31647	Antiinflammatory	-0.39	-0.96	0.85	3	3430.37	FSTVQDDIGR
FCEILTLMTLSCSSTYDIEMTTFFLAGF	0.941152	Antiinflammatory	0.12	1	-0.72	-3	3186.14	FCEILTLMTL
RPASSVSLLCRPTCSRPACCIP	1.07733	Antiinflammatory	-0.17	0.28	-0.1	3	2318.07	RPASSVSLLC
VGEVIEVLEALLIFVYLNMILLYLLPR	0.959798	Antiinflammatory	0.21	1.63	-0.83	-2	3147.36	VGEVIEVLEA
FDLLLKQMELQDDGITMGFEH	1.26282	Antiinflammatory	-0.07	-0.19	0.04	-3.5	2481.17	FDLLLKQMEL
QKHSALHYDPGLPQD	0.922153	Antiinflammatory	-0.24	-1.37	0.15	0	1706.07	QKHSALHYDP
KLLQDMRHFPTISADYSQDEKALLGACDCSQIVKPSGVHLKLVLR	1.19055	Antiinflammatory	-0.15	-0.11	0.07	2	5026.57	KLLQDMRHFP
LGSIISAAVYLQIHTLVKMCSDFLIQEMSVENCMYIAN	1.29058	Antiinflammatory	0.07	0.81	-0.58	-1.5	4250.64	LGSIISAAVY
QNGDFTRALKTVNKILQL	1.23591	Antiinflammatory	-0.21	-0.38	0.02	2	2059.68	QNGDFTRALK
AVTLTMVENDHIRGAKSEILYIRTNASVPSIPLDV	1.03342	Antiinflammatory	-0.07	0.2	-0.09	-0.5	3824.94	AVTLTMVEND
ESEGGALLSLENEAEQKLIESMLQ	1.22911	Antiinflammatory	-0.13	-0.4	0.39	-5	2619.27	ESEGGALLSL
LQYHEHVTEGFENMPAAFIGLLKGENLGK	1.24122	Antiinflammatory	-0.06	-0.31	-0.1	-1	3244.15	LQYHEHVTEG
VHEDIEVGTIIGTVMARDPDST	1.15867	Antiinflammatory	-0.08	-0.03	0.22	-3.5	2355.93	VHEDIEVGTI
QKGLILLHDNTQSC	1.44327	Antiinflammatory	-0.15	-0.33	-0.16	0.5	1570.02	QKGLILLHDN
MYLCCLSTSRSSTDKLAFDV	1.41807	Antiinflammatory	-0.12	0.29	-0.15	0	2240.86	MYLCCLSTSR
LGLVQALGTHLHQN	1.01065	Antiinflammatory	0.02	0.2	-0.71	1	1500.96	LGLVQALGTH
SSWPGSFLMDDSMSNTLNSLEEHAS	1.23456	Antiinflammatory	-0.12	-0.54	-0.03	-3.5	2743.28	SSWPGSFLMD
DLKTSNLLLSHAGILKVGDFGLARE	1.98497	Antiinflammatory	-0.07	0.2	0.01	0.5	2668.48	DLKTSNLLLS
VLGVLSQDGIMRFL	1.07503	Antiinflammatory	0.08	1.14	-0.54	0	1548.1	VLGVLSQDGI
PGRKDALNSIENSTYR	0.977599	Antiinflammatory	-0.4	-1.4	0.57	1	1821.2	PGRKDALNSI
RLEKDLQAARDTQSKALTERLKLNSKRNQ	1.77028	Antiinflammatory	-0.52	-1.51	0.91	4	3412.3	RLEKDLQAAR
LILITVLRMHSAAARKKAFATC	0.986082	Antiinflammatory	-0.04	0.85	-0.31	4.5	2415.32	LILITVLRMH
EGKRVLIAAHGNSLRGIVKH	1.38868	Antiinflammatory	-0.17	-0.18	0.17	4	2155.85	EGKRVLIAAH
HCVDENIERRNHYLDLAGIENYTSQF	1.16322	Antiinflammatory	-0.25	-0.9	0.13	-2	3137.78	HCVDENIERR
DMKSEGQATVIQRLEQTIEDLKTKIAELEKQYPAL	1.1367	Antiinflammatory	-0.24	-0.7	0.48	-2	4019.14	DMKSEGQATV
TEGRLKVTLLECSRLLIFGSYDTEANL	1.38282	Antiinflammatory	-0.12	0.09	0.01	-1	3042.91	TEGRLKVTLL
DAQTTSASVSEYLILAQKQRTQTYLEPEPEDS	1.19653	Antiinflammatory	-0.24	-0.93	0.3	-4	3600.33	DAQTTSASVS
GIADETKLNTVDDQKT	1.21335	Antiinflammatory	-0.29	-1.06	0.72	-2	1748.11	GIADETKLNT
SPKLLTHKRTYSDEASQMRAAPPRA	0.977123	Antiinflammatory	-0.36	-1.13	0.46	3.5	2812.54	SPKLLTHKRT
LATEAIENFRTVVSLTWE	0.973225	Antiinflammatory	-0.04	0.26	-0.22	-2	2079.6	LATEAIENFR
RKAHVYGISFSISQAF	1.35446	Antiinflammatory	-0.05	0.2	-0.42	2.5	1811.3	RKAHVYGISF
TAIRESAAGEREIVKNAECSV	1.04346	Antiinflammatory	-0.22	-0.29	0.56	-1	2233.77	TAIRESAAGE
MEQMLKCTNVYERSKQR	1.37365	Antiinflammatory	-0.46	-1.34	0.55	2	2144.76	MEQMLKCTNV
LRPEEALQALTIYEGKFGRL	1.20291	Antiinflammatory	-0.16	-0.26	0.15	0	2304.98	LRPEEALQAL
PTVHVSLVAKNLDRKL	1.18386	Antiinflammatory	-0.17	0.01	0.07	2.5	1790.38	PTVHVSLVAK
TKCSIPVLHSSAAMLKIAEMEYSG	1.1834	Antiinflammatory	-0.02	0.3	-0.16	0.5	2567.38	TKCSIPVLHS
KFTRVLLTVLIAFTKKETS	1.29697	Antiinflammatory	-0.09	0.44	-0.11	3	2195.96	KFTRVLLTVL
VLLVSTLQRSLLFYTEERSVQQVG	1.05231	Antiinflammatory	-0.1	0.28	-0.3	0	2766.57	VLLVSTLQRS
YLLKKSSTSARDVGKRVGVGTQKTKSRLK	1.49395	Antiinflammatory	-0.38	-0.89	0.6	8	3193.19	YLLKKSSTSA
ELKTLKEDAATFSSLRAMFATR	1.56894	Antiinflammatory	-0.21	-0.22	0.3	1	2487.17	ELKTLKEDAA
SGIMPPTPSPPKLKEAGICNLSL	0.985456	Antiinflammatory	-0.04	0	-0.09	1	2351.16	SGIMPPTPSP
GGTPPTDSPHIQMAEDTLQTLIAHSPGPSGPR	1.03366	Antiinflammatory	-0.12	-0.71	0.04	-1	3267.07	GGTPPTDSPH
VMYSNINGKICIGLHYEYGN	1.37899	Antiinflammatory	-0.01	-0.06	-0.57	0.5	2288.94	VMYSNINGKI
YISSSLENATNSADAASSKFVFGQ	1.1494	Antiinflammatory	-0.08	-0.14	-0.14	-1	2494.98	YISSSLENAT
QYDNNAHCVWIITALNPAKVIKLAFE	0.918113	Antiinflammatory	-0.02	0.21	-0.43	0.5	2972.85	QYDNNAHCVW
SPVFPLSRWIVIDYSQLDRNLKAAKEALQG	1.20207	Antiinflammatory	-0.14	-0.17	-0.03	1	3416.39	SPVFPLSRWI
TIQDVFKSNKEVGRLGSKESKKETGCVESGENDHLVIPGGSQ	0.989653	Antiinflammatory	-0.25	-0.87	0.55	-0.5	4489.6	TIQDVFKSNK
VITMMATDQDEGSNAELAYSLEGP	1.39784	Antiinflammatory	-0.07	-0.24	0.08	-5	2543.12	VITMMATDQD
LSQTNLENMQARGSEFSSTAWNVQGR	0.930229	Antiinflammatory	-0.25	-0.89	0.01	0	2912.53	LSQTNLENMQ
KFYVGQPRFLLLFYALYNTLVARS	1.33947	Antiinflammatory	-0.01	0.5	-0.75	3	2880.79	KFYVGQPRFL
SGIKGGDERGLLSLAFHPNYKKNGKL	0.985176	Antiinflammatory	-0.2	-0.75	0.28	3.5	2800.62	SGIKGGDERG
FMTRETADTDTAEQVIASFRILASDKPYIL	1.24334	Antiinflammatory	-0.12	-0.04	0.07	-2	3404.28	FMTRETADTD
LVAGLTANEGSQHNPQVADL	1.11959	Antiinflammatory	-0.06	-0.14	-0.18	-1.5	2034.52	LVAGLTANEG
LSRKLAQLPDRCTLKTGRYNINFL	1.2267	Antiinflammatory	-0.27	-0.43	0.04	4	2821.7	LSRKLAQLPD
DVMKLACADTHTNSVY	1.27716	Antiinflammatory	-0.11	-0.06	-0.14	-0.5	1768.21	DVMKLACADT
VWRAGGCERAVVTLASGTQHF	1.02947	Antiinflammatory	-0.07	0.17	-0.31	1.5	2245.85	VWRAGGCERA
LTHRILSLGKQCLCFSGLKL	0.965781	Antiinflammatory	-0.04	0.65	-0.41	3.5	2231.08	LTHRILSLGK
LYLTSVETESLTGPQAVARASS	1.32276	Antiinflammatory	-0.08	0.07	-0.14	-1	2280.83	LYLTSVETES
GENEEGSEGELVVK	0.978384	Antiinflammatory	-0.22	-1.05	0.98	-4	1475.74	GENEEGSEGE
FYVMDTLVMKKEENDIP	1.29568	Antiinflammatory	-0.13	-0.33	0.22	-2	2072.67	FYVMDTLVMK
LDYLTQKRSQLVKK	1.4381	Antiinflammatory	-0.39	-0.99	0.44	3	1720.26	LDYLTQKRSQ
PLLLLPLLWGGSLQEMAGYGL	1.74084	Antiinflammatory	0.19	0.92	-0.88	-1	2242.07	PLLLLPLLWG
FGRSAYGGLQTSSYLMSAR	1.03267	Antiinflammatory	-0.13	-0.23	-0.32	2	2052.56	FGRSAYGGLQ
ATTLSEASVIGTSVVQVR	1.08192	Antiinflammatory	-0.02	0.68	-0.26	0	1818.32	ATTLSEASVI
ERVVQEALDRASAGRTVLVIA	1.27596	Antiinflammatory	-0.16	0.32	0.22	0	2253.89	ERVVQEALDR
EPELLLSEGPGAPQP	1.01563	Antiinflammatory	-0.06	-0.59	0.24	-3	1533.92	EPELLLSEGP
LPGCNVNILCHGWLQDLVFML	1.33629	Antiinflammatory	0.14	1	-0.95	-0.5	2386.23	LPGCNVNILC
LIEKLLKDKSTLVAGSVVMAFE	1.54513	Antiinflammatory	0	0.71	0	0	2392.23	LIEKLLKDKS
YCSNDCILKHAAATMRFL	1.11617	Antiinflammatory	-0.09	0.32	-0.36	1.5	2057.68	YCSNDCILKH
MLPSSLMLLNTAHEYLGRR	1.76366	Antiinflammatory	-0.12	-0.01	-0.29	1.5	2202.91	MLPSSLMLLN
GTCLSLSQGQGTC	1.1538	Antiinflammatory	-0.05	0.11	-0.42	0	1254.59	GTCLSLSQGQ
PNHSGMPKGLENNSDS	1.37013	Antiinflammatory	-0.29	-1.58	0.43	-0.5	1684	PNHSGMPKGL
LLNHGSGGLVHQLLSQAKTP	1.09134	Antiinflammatory	-0.04	-0.05	-0.41	2	2070.71	LLNHGSGGLV
GAFVTYFTVYAQQ	0.969729	Antiinflammatory	0.1	0.48	-1.08	0	1494.85	GAFVTYFTVY
RSHATGFRDPSSKAYVRAMIMV	0.994757	Antiinflammatory	-0.21	-0.25	0.06	3.5	2481.19	RSHATGFRDP
TFIGAYFGFKKNAIEHPVR	1.40265	Antiinflammatory	-0.06	-0.09	-0.24	2.5	2195.83	TFIGAYFGFK
VKKYCLDLVEGARQMR	1.37603	Antiinflammatory	-0.3	-0.42	0.41	2	1909.53	VKKYCLDLVE
SQEPLISSEPTLSRGALTTR	0.917982	Antiinflammatory	-0.22	-0.53	0.23	0	2143.67	SQEPLISSEP
ATAHGLSHSQATMKVAVK	1.24699	Antiinflammatory	-0.09	0.01	-0.17	3	1837.39	ATAHGLSHSQ
YILPKGTEVYPVLSSALHESCYFE	1.13464	Antiinflammatory	0	0.13	-0.38	-1.5	2746.48	YILPKGTEVY
WANQLLVRLLADRQRP	1.07289	Antiinflammatory	-0.29	-0.44	-0.03	2	1949.53	WANQLLVRLL
SKQLQQTNLALNKMQQFNICALS	0.960747	Antiinflammatory	-0.17	-0.33	-0.3	2	2622.42	SKQLQQTNLA
QCHQLQPLPQHLSQSSIASS	1.29637	Antiinflammatory	-0.15	-0.55	-0.36	1	2189.74	QCHQLQPLPQ
KYSKFSHMHLMAFR	0.95935	Antiinflammatory	-0.2	-0.47	-0.26	4	1783.34	KYSKFSHMHL
NNLIKTIRNTLRDLEKAIRG	1.50932	Antiinflammatory	-0.35	-0.69	0.47	3	2339.05	NNLIKTIRNT
RVLAVNGVSLEGATHKQAVETLRNTGQ	1.17736	Antiinflammatory	-0.18	-0.28	0.06	1.5	2849.62	RVLAVNGVSL
HFLGGGEMLLLNVMAFDP	0.954458	Antiinflammatory	0.15	0.78	-0.62	-1.5	1961.61	HFLGGGEMLL
QRNMASCYLHLGQFDK	1.062	Antiinflammatory	-0.24	-0.72	-0.11	1.5	1911.42	QRNMASCYLH
TYYMSGGLQSVPIV	1.26849	Antiinflammatory	0.11	0.56	-0.86	0	1514.97	TYYMSGGLQS
MAEEKTVRDKEYKAFQIKLER	1.3658	Antiinflammatory	-0.42	-1.28	0.98	1	2613.33	MAEEKTVRDK
ARLTQHLLAHAQDQKPPGG	1.31102	Antiinflammatory	-0.22	-0.88	0.07	2	2038.59	ARLTQHLLAH
LMKLFQRSTPAITLENPDIK	0.953272	Antiinflammatory	-0.16	-0.24	0.08	1	2316.06	LMKLFQRSTP
MRSHGALSRVTLLW	1.37596	Antiinflammatory	-0.1	0.25	-0.46	2.5	1627.15	MRSHGALSRV
SFLLCIGWLALTDMVGQLLTSPVVL	1.00082	Antiinflammatory	0.22	1.58	-0.98	-1	2690.7	SFLLCIGWLA
RQDLQTLCCTEGCSMS	1.12483	Antiinflammatory	-0.23	-0.31	0.08	-1	1775.24	RQDLQTLCCT
LTLKSANHSQT	1.39744	Antiinflammatory	-0.22	-0.7	-0.13	1.5	1199.49	LTLKSANHSQ
EKCPYMAFHNDIFHFSYL	1.10633	Antiinflammatory	-0.03	-0.16	-0.56	0	2262.84	EKCPYMAFHN
LILDDIHERSMATD	1.07232	Antiinflammatory	-0.17	-0.21	0.39	-2.5	1629.02	LILDDIHERS
VMIHMFLGDQEL	0.978684	Antiinflammatory	0.1	0.73	-0.52	-1.5	1432.91	VMIHMFLGDQ
VLTPIENTRTESVSSDEEVHES	1.16954	Antiinflammatory	-0.24	-0.83	0.57	-4.5	2458.89	VLTPIENTRT
FGSSKNGFGFKQ	1.04829	Antiinflammatory	-0.15	-0.77	-0.04	2	1303.61	FGSSKNGFGF
ERMRDVLLAATANT	0.924423	Antiinflammatory	-0.23	-0.13	0.25	0	1560.98	ERMRDVLLAA
FLCSLCVPRVRKLWSSR	1.22125	Antiinflammatory	-0.21	0.31	-0.2	4	2050.75	FLCSLCVPRV
RPPRLWSFKSGQPARIP	0.911336	Antiinflammatory	-0.31	-1.02	0.16	4	1993.58	RPPRLWSFKS
VRGRHLVLLDKKET	1.03045	Antiinflammatory	-0.34	-0.59	0.62	2.5	1664.2	VRGRHLVLLD
LVEYDYKPEFASAMGINTAHQTGML	1.19773	Antiinflammatory	-0.04	-0.14	-0.27	-1.5	2787.53	LVEYDYKPEF
FGTQVTEDGSEIPSIIQDARDLIAHLAADMS	1.14143	Antiinflammatory	-0.07	-0.01	0.09	-4.5	3302.09	FGTQVTEDGS
NSQDGGILTRAAGVLSRTLSSSL	1.11827	Antiinflammatory	-0.12	0.06	-0.06	1	2303.9	NSQDGGILTR
LLHPFHEQFSDYSGSQL	1.12045	Antiinflammatory	-0.08	-0.54	-0.38	-1	2005.43	LLHPFHEQFS
EKLIARGKQVSDLIRSGKPL	0.902115	Antiinflammatory	-0.26	-0.44	0.54	3	2208.94	EKLIARGKQV
MKLGRPTLSSEVGIIICDITNP	1.1056	Antiinflammatory	-0.03	0.38	-0.12	0	2358.15	MKLGRPTLSS
KLEALENDFAVHEIRV	1.42872	Antiinflammatory	-0.16	-0.14	0.36	-1.5	1883.37	KLEALENDFA
HILDQAPKARKFFEK	1.14163	Antiinflammatory	-0.31	-0.93	0.54	2.5	1828.36	HILDQAPKAR
NRLTRGLSICTTCLLSVFQAITLNLRNSCL	1.37395	Antiinflammatory	-0.08	0.63	-0.49	3	3325.43	NRLTRGLSIC
VLGAKIKAMESKLLVGG	1.00627	Antiinflammatory	0.03	0.74	-0.01	2	1714.41	VLGAKIKAME
YPDRTYIFTFLLSSRVF	0.999762	Antiinflammatory	-0.06	0.29	-0.6	1	2125.69	YPDRTYIFTF
GINANDVKKLEEAGFHTVE	1.2155	Antiinflammatory	-0.15	-0.55	0.39	-1.5	2071.56	GINANDVKKL
VYLVGMADALIHTILAFHLCFCGSNEIN	1.3381	Antiinflammatory	0.15	1.11	-0.8	-1	3066.05	VYLVGMADAL
GVGVVVTSGRHPR	0.987742	Antiinflammatory	-0.14	0.02	-0.05	2.5	1320.71	GVGVVVTSGR
SAVLEAVENNTLSIEP	1.38688	Antiinflammatory	-0.03	0.17	0.01	-3	1686.08	SAVLEAVENN
DVATADKALSPELPVPVENIKQETDD	1.24378	Antiinflammatory	-0.19	-0.62	0.6	-5	2795.42	DVATADKALS
LIFALSGHQLTLSLSHFP	1.48345	Antiinflammatory	0.14	0.88	-0.92	1	1981.61	LIFALSGHQL
VCFSAGYFIHDTVDIVISHQSRASWEYLVHHVMA	1.09904	Antiinflammatory	0.03	0.43	-0.6	0	3919.96	VCFSAGYFIH
LQDLLLHYTACPLS	1.1606	Antiinflammatory	0.05	0.62	-0.73	-0.5	1587.08	LQDLLLHYTA
QVAQRSNSELELTSVVENTF	1.18119	Antiinflammatory	-0.19	-0.4	0.09	-2	2251.73	QVAQRSNSEL
LVPGVGGLTSLRCSASGSKISLL	1.64201	Antiinflammatory	0.04	0.87	-0.36	2	2215.99	LVPGVGGLTS
NDAFLQNGAHFLVQLEAV	1.40939	Antiinflammatory	0.02	0.34	-0.48	-1.5	1986.49	NDAFLQNGAH
KKKNKGGVAVKAHQ	1.2825	Antiinflammatory	-0.38	-1.32	0.78	5.5	1493	KKKNKGGVAV
LGLEEASAAVL	1.04515	Antiinflammatory	0.14	1.16	-0.19	-2	1072.38	LGLEEASAAV
ELVLVTARVTTERTPGTCLYFS	1.25243	Antiinflammatory	-0.08	0.34	-0.27	0	2457.16	ELVLVTARVT
RIGMRGRELMGGIGKTMMQS	0.92632	Antiinflammatory	-0.21	-0.38	0.23	3	2210.01	RIGMRGRELM
PKKFDVSVDMPDLLDINHLRARGLQPGEEELPDL	0.997694	Antiinflammatory	-0.21	-0.61	0.48	-3.5	3858.9	PKKFDVSVDM
ALRRASIKIVTPDWVL	1.24329	Antiinflammatory	-0.09	0.51	-0.17	2	1838.46	ALRRASIKIV
LISGSLLAAAEKNSTQSML	0.989584	Antiinflammatory	-0.01	0.44	-0.24	0	1934.52	LISGSLLAAA
YLLTLVGNLGVITLILLDSRLH	1.40968	Antiinflammatory	0.14	1.31	-0.82	0.5	2437.34	YLLTLVGNLG
RLHLWAFKMDYE	1.0195	Antiinflammatory	-0.17	-0.56	-0.17	0.5	1609.05	RLHLWAFKMD
LVLSEARKQLMIYRLPQV	1.04213	Antiinflammatory	-0.14	0.26	-0.19	2	2157.93	LVLSEARKQL
ELVTEIPPKVKDPSTELAAATEALSTDPVT	0.902074	Antiinflammatory	-0.1	-0.15	0.3	-4	3123.93	ELVTEIPPKV
EMLERKYGGRLVTRHAARTIQTAFRQ	1.49994	Antiinflammatory	-0.35	-0.82	0.32	4.5	3089.96	EMLERKYGGR
GGLVLGMASMYDGSA	1.00287	Antiinflammatory	0.14	0.75	-0.49	-1	1428.86	GGLVLGMASM
PTQQRSAPDISFTIDANKQQRQL	1.51807	Antiinflammatory	-0.35	-1.21	0.31	1	2643.25	PTQQRSAPDI
PALHLPELEREEEKE	1.00052	Antiinflammatory	-0.35	-1.51	1.17	-3.5	1819.22	PALHLPELER
QRYLYSASMLAAENDPYGPL	1.13941	Antiinflammatory	-0.11	-0.45	-0.25	-1	2259.8	QRYLYSASML
SALMFPTYKYQNPYGF	1.02686	Antiinflammatory	-0.03	-0.43	-0.76	1	1927.43	SALMFPTYKY
HPQDSMELVHKQSKAVAVTSMSFP	1.08739	Antiinflammatory	-0.14	-0.36	-0.01	1	2655.39	HPQDSMELVH
LMGLEGEQVHQSGSGWS	1.27697	Antiinflammatory	-0.05	-0.49	-0.18	-1.5	1802.22	LMGLEGEQVH
LSRILQSPQGYALLIGVGGSGKQSL	1.5396	Antiinflammatory	-0.01	0.28	-0.36	2	2543.37	LSRILQSPQG
TTTTLRKKHADSVAELGE	1.1538	Antiinflammatory	-0.28	-0.81	0.56	0.5	1957.43	TTTTLRKKHA
TAGLSFHIASLDESGLLNVWVVVE	1.05082	Antiinflammatory	0.12	0.87	-0.53	-2.5	2557.27	TAGLSFHIAS
APRDLAVPDGYTNRT	1.14194	Antiinflammatory	-0.29	-0.95	0.32	0	1645.99	APRDLAVPDG
SRDLKFLTGFETKAFSDAHVEA	1.00382	Antiinflammatory	-0.16	-0.33	0.28	-0.5	2470.04	SRDLKFLTGF
TITVSRKDSGILVRQEARISWFG	1.15566	Antiinflammatory	-0.18	-0.13	0.07	2	2620.35	TITVSRKDSG
PMEIDSALSTVQTLKSELQDAKMAAVESQLKPLPGE	1.12984	Antiinflammatory	-0.13	-0.28	0.27	-3	3856.96	PMEIDSALST
FDDLENLNSLTKSSLDLGMML	1.2775	Antiinflammatory	-0.08	0.05	0	-3	2357.01	FDDLENLNSL
TGAFRVSSPGLEE	0.929564	Antiinflammatory	-0.12	-0.28	0.22	-1	1349.64	TGAFRVSSPG
GRPMQVIGALIGKQ	0.954414	Antiinflammatory	-0.06	0.18	-0.16	2	1468.02	GRPMQVIGAL
CCQTCNGMALEIQQV	1.00091	Antiinflammatory	-0.06	0.34	-0.43	-1	1641.15	CCQTCNGMAL
EFFLLGLTQNPKMQN	1.10799	Antiinflammatory	-0.09	-0.35	-0.35	0	1780.31	EFFLLGLTQN
LHLHSLSLENNRIT	1.74329	Antiinflammatory	-0.17	-0.29	-0.24	1	1647.09	LHLHSLSLEN
KLENNPVENATTV	1.45699	Antiinflammatory	-0.22	-0.8	0.27	-1	1428.75	KLENNPVENA
TLQSGAYGVYEIGGLFPVW	1.07465	Antiinflammatory	0.16	0.52	-0.86	-1	2057.63	TLQSGAYGVY
SMGGLLLLALITALLYKCGFFKR	1.03568	Antiinflammatory	0.11	1.23	-0.7	3	2529.55	SMGGLLLLAL
STADPSSLVHHTNSCLPHHPPRVASVM	1.21612	Antiinflammatory	-0.12	-0.29	-0.24	2	2878.62	STADPSSLVH
LIIVGICLILIVIFMITKF	1.11633	Antiinflammatory	0.43	2.96	-1.35	1	2163.22	LIIVGICLIL
NLVMYIIIIIHWNACVYFSIS	1.13914	Antiinflammatory	0.26	1.57	-1.35	0.5	2513.39	NLVMYIIIII
KDGSNHKAESGALIEAAKSKIHQ	1.0364	Antiinflammatory	-0.26	-0.99	0.6	2	2420.02	KDGSNHKAES
QQRGWVFTPGVDDAESECGLDNFRTFD	1.2391	Antiinflammatory	-0.21	-0.8	0.26	-4	3090.67	QQRGWVFTPG
TLKASEKSTMEQLVEK	1.24588	Antiinflammatory	-0.29	-0.83	0.69	0	1822.34	TLKASEKSTM
DGLMKVEVSEDFLSINPLPSSPFTYPVPK	0.921036	Antiinflammatory	-0.05	-0.1	-0.04	-2	3208.11	DGLMKVEVSE
STSRAWNGSSVTMFILLGFADHP	1.16154	Antiinflammatory	0	0.21	-0.5	0.5	2495.14	STSRAWNGSS
TLMTCEMLRKKSGMQIALNDHL	1.14689	Antiinflammatory	-0.16	-0.11	0	1.5	2534.41	TLMTCEMLRK
ASLKTSSTAAQETLTSDVLFPTNEEQDPS	0.927015	Antiinflammatory	-0.18	-0.65	0.25	-4	3068.66	ASLKTSSTAA
NSSLIKHQRIHAGEKPHKCTECS	1.52533	Antiinflammatory	-0.32	-1.1	0.41	3.5	2604.3	NSSLIKHQRI
LAASEDGTVYVGDAHTNTVWKFTSTEK	1.02781	Antiinflammatory	-0.12	-0.44	0.01	-1.5	2928.55	LAASEDGTVY
KLQKLLLHSNRLASLESGLLDSLRA	1.59858	Antiinflammatory	-0.18	0.01	0.08	2.5	2776.67	KLQKLLLHSN
LTLYVYLLQCLNSE	1.08426	Antiinflammatory	0.06	0.79	-0.91	-1	1672.19	LTLYVYLLQC
DIIESTHDYWRA	0.930605	Antiinflammatory	-0.21	-0.92	0.13	-1.5	1505.77	DIIESTHDYW
DLITRMLQRDPKRRASL	1.24557	Antiinflammatory	-0.47	-0.94	0.71	3	2069.7	DLITRMLQRD
LTLKVLRSSSCGDT	1.02185	Antiinflammatory	-0.17	0.14	0.09	1	1479.91	LTLKVLRSSS
VSEGGVLSESSTTATITV	0.948517	Antiinflammatory	0.03	0.49	-0.17	-2	1738.14	VSEGGVLSES
QSRGFGELLSTTKQDFVLE	1.54033	Antiinflammatory	-0.18	-0.45	0.17	-1	2155.68	QSRGFGELLS
LQYFLRGGTGLAAFSINQDT	1.00247	Antiinflammatory	-0.03	0.09	-0.47	0	2172.73	LQYFLRGGTG
QLLGKMKTSASPFFLA	1.25377	Antiinflammatory	0	0.43	-0.39	2	1739.34	QLLGKMKTSA
QQLLKRMLVRKLCQPQS	1.39175	Antiinflammatory	-0.34	-0.55	0.12	4	2069.83	QQLLKRMLVR
MPLGISLPQVELTGFREATPGQQAE	0.953607	Antiinflammatory	-0.07	-0.21	-0.06	-2	2670.42	MPLGISLPQV
RLLNTTDVYVLPSLNPDGFER	0.966682	Antiinflammatory	-0.17	-0.34	0	-1	2420.03	RLLNTTDVYV
LHVQLADKDLYVAEALSTLESWRSRYNQ	1.28825	Antiinflammatory	-0.21	-0.51	0	-0.5	3307.1	LHVQLADKDL
MKGFHFADSKQNVPS	1.23445	Antiinflammatory	-0.19	-0.77	0.08	1.5	1693.12	MKGFHFADSK
VQVQSGLTIAVHFEQPFQIL	1.04792	Antiinflammatory	0.07	0.62	-0.7	-0.5	2254.94	VQVQSGLTIA
RVLRETLLARPAA	0.96422	Antiinflammatory	-0.25	0.13	0.25	2	1465.94	RVLRETLLAR
CVDNADEDGCESKINR	1.07649	Antiinflammatory	-0.38	-1.16	0.99	-3	1768.07	CVDNADEDGC
PINQRACHILECCEGLAQSVIST	1.3554	Antiinflammatory	-0.07	0.3	-0.23	-0.5	2486.22	PINQRACHIL
KQQERKLCGDILLTAASISYLGF	1.24565	Antiinflammatory	-0.1	0.1	-0.09	1	2555.34	KQQERKLCGD
DPDHRQQWIDAIEQHKTESGYGS	1.27796	Antiinflammatory	-0.33	-1.69	0.48	-2	2698.16	DPDHRQQWID
HDVGHNLGMHHDTETCQCGAPKCIMF	0.955338	Antiinflammatory	-0.11	-0.38	-0.16	0	2882.67	HDVGHNLGMH
GFVGNGLVVWLLGSQGQRSPFSVYILHLGV	1.14981	Antiinflammatory	0.12	0.78	-0.83	1.5	3201.23	GFVGNGLVVW
VAPQGLQLLKSTEDSLLVS	1.09365	Antiinflammatory	-0.04	0.33	-0.14	-1	1998.6	VAPQGLQLLK
LLALGAASLALCCGAVALYA	1.00676	Antiinflammatory	0.28	2.08	-0.99	0	1864.58	LLALGAASLA
KGLNKSATLVHLSL	1.69681	Antiinflammatory	-0.06	0.29	-0.24	2.5	1480.99	KGLNKSATLV
SCVSLGCNAEHRQLD	1.20436	Antiinflammatory	-0.22	-0.34	0.13	-0.5	1632.01	SCVSLGCNAE
TSQGSPAFQPPEIANGLDTFSGFKV	1.03688	Antiinflammatory	-0.05	-0.27	-0.16	-1	2596.21	TSQGSPAFQP
YVLPSEYYGPLKTLLLKSPDVQPISAS	1.41965	Antiinflammatory	-0.03	0.03	-0.3	0	2979.87	YVLPSEYYGP
VLASLIIVANALVAMAVLSLILK	1.34884	Antiinflammatory	0.29	2.39	-0.97	1	2336.37	VLASLIIVAN
ADPQLLGKGRESALSLACSKGYT	1.15794	Antiinflammatory	-0.16	-0.3	0.16	1	2366.02	ADPQLLGKGR
SIRISDGGKLVIKDQ	0.990458	Antiinflammatory	-0.2	-0.25	0.47	1	1629.12	SIRISDGGKL
DRSPAHSVRASQAGPEPG	1.03206	Antiinflammatory	-0.3	-1.17	0.53	0.5	1819.16	DRSPAHSVRA
KVHIGRLTRNVTKDHIMEL	0.966934	Antiinflammatory	-0.25	-0.45	0.26	3	2260.99	KVHIGRLTRN
DQEALLSYAREAADFSTQQ	0.9052	Antiinflammatory	-0.24	-0.79	0.28	-3	2143.51	DQEALLSYAR
LKCIAKKALEGKEGSME	1.0504	Antiinflammatory	-0.21	-0.45	0.74	1	1835.46	LKCIAKKALE
WLIYDEMTRAHRIANIRCCS	1.34954	Antiinflammatory	-0.21	-0.15	-0.13	1.5	2452.15	WLIYDEMTRA
LRTLKAAFKTLSSAQDSEAA	1.02899	Antiinflammatory	-0.18	-0.17	0.25	1	2108.65	LRTLKAAFKT
RRTVLGLARCWRRF	1.02117	Antiinflammatory	-0.42	-0.4	0.15	5	1790.36	RRTVLGLARC
TVRKLAKPPHLIMRIMDCV	1.06998	Antiinflammatory	-0.14	0.3	-0.01	3.5	2222.1	TVRKLAKPPH
LSKHMLTHSSTKDYMCT	1.06141	Antiinflammatory	-0.2	-0.56	-0.11	2	1983.55	LSKHMLTHSS
FQTVTQMVRVWRNECLRV	1.02605	Antiinflammatory	-0.24	-0.11	-0.23	2	2265.95	FQTVTQMVRV
PALLKLACTDTHVNEAELN	1.62403	Antiinflammatory	-0.09	-0.02	-0.01	-1.5	2052.61	PALLKLACTD
SRNICSLVNWLKSFK	1.24415	Antiinflammatory	-0.18	-0.07	-0.23	3	1795.35	SRNICSLVNW
CIIESALLVAMAFDRYVAL	0.910783	Antiinflammatory	0.14	1.56	-0.62	-1	2098.82	CIIESALLVA
GIIMVGVIVGSKKTGINPDN	0.990321	Antiinflammatory	0.04	0.48	-0.18	1	2012.72	GIIMVGVIVG
LMGLEALKSHIMAAKA	1.21482	Antiinflammatory	0.03	0.7	-0.19	1.5	1684.33	LMGLEALKSH
LGIGSFQTFDVLVNTNTGL	1.13312	Antiinflammatory	0.08	0.62	-0.66	-1	1996.55	LGIGSFQTFD
TINSLVIAAIIVTRKLHHPANYL	1.33753	Antiinflammatory	0.03	0.71	-0.63	3	2558.43	TINSLVIAAI
GGTGHIILDNVQCVGNEA	1.06541	Antiinflammatory	0.01	0.14	-0.23	-1.5	1797.26	GGTGHIILDN
TRYLTSYRKKTVPGADGQRM	1.29082	Antiinflammatory	-0.39	-1.23	0.38	4	2328.96	TRYLTSYRKK
WGSLHVYQRMIDKAEDVC	1.11263	Antiinflammatory	-0.16	-0.34	-0.01	-0.5	2150.72	WGSLHVYQRM
MLLMATILHLGKSSLPK	1.20808	Antiinflammatory	0.06	0.81	-0.48	2.5	1853.63	MLLMATILHL
AESTDHYIGFETDLQDL	1.01401	Antiinflammatory	-0.13	-0.67	0.21	-4.5	1954.28	AESTDHYIGF
ALGDCWLLAAIASLTLNDTLLHRVV	1.30864	Antiinflammatory	0.09	1.1	-0.62	-0.5	2679.56	ALGDCWLLAA
ALGLENDPDAPAAQLARALLRARLDP	1.66735	Antiinflammatory	-0.17	-0.17	0.27	-1	2728.47	ALGLENDPDA
RKWMGLACFRSLVVSSSSIRQKKLIHK	1.11557	Antiinflammatory	-0.23	-0.12	0.06	7.5	3160.26	RKWMGLACFR
ALLVGVGGSGKQSLTRLASFIAGYTSFQL	1.33245	Antiinflammatory	0.06	0.68	-0.54	2	2942.86	ALLVGVGGSG
PASPASNVVVLPSGSTVYVKS	1.02243	Antiinflammatory	0.02	0.47	-0.4	1	2059.64	PASPASNVVV
CLADLNGALIMVVVGSLSQFH	1.34281	Antiinflammatory	0.15	1.29	-0.75	-0.5	2187.93	CLADLNGALI
LVSTPTARNLLYRLQLGMLQ	1.00547	Antiinflammatory	-0.09	0.28	-0.52	2	2288.07	LVSTPTARNL
LVTVDDCDQGANGEVASLSIVA	1.11307	Antiinflammatory	0.01	0.58	-0.06	-4	2176.7	LVTVDDCDQG
LGSLPCLEHVALLNNPLSIIPDY	1.2421	Antiinflammatory	0.08	0.65	-0.57	-1.5	2492.29	LGSLPCLEHV
ARVYLACRDVQNGELVAREIQMMTGN	0.924605	Antiinflammatory	-0.19	-0.17	0.04	0	2938.78	ARVYLACRDV
PLPNTVKDFWRLVLDYHCTSV	1.01771	Antiinflammatory	-0.09	-0.02	-0.38	0.5	2504.21	PLPNTVKDFW
TEDSDEEWTPRQQGKPSGMAFRGEPSKHP	0.954459	Antiinflammatory	-0.37	-1.86	0.77	-1.5	3285.92	TEDSDEEWTP
EKPASSLPSSPPLPPQLLTRNLVL	1.1176	Antiinflammatory	-0.1	-0.15	-0.11	1	2555.37	EKPASSLPSS
TVNKFSLRVFGSHKAVEIEQ	1.24288	Antiinflammatory	-0.16	-0.2	0.07	1.5	2289.92	TVNKFSLRVF
GLILVSYSRIAWAVLTIRSA	1.07699	Antiinflammatory	0.08	1.2	-0.72	2	2189.93	GLILVSYSRI
EWSLHKIYLCQSGYFS	1.04728	Antiinflammatory	-0.04	-0.19	-0.64	0.5	1961.46	EWSLHKIYLC
NQSEAGSHTLQQMFGCD	1.193	Antiinflammatory	-0.18	-0.85	-0.04	-1.5	1853.22	NQSEAGSHTL
ELVLEACIFGTVFRRD	0.965262	Antiinflammatory	-0.07	0.61	-0.02	-1	1868.41	ELVLEACIFG
PKYSIHIDQMPQTRLIHLSMAPDAGLPA	1.14767	Antiinflammatory	-0.08	-0.18	-0.2	1	3102.06	PKYSIHIDQM
KGTIGFEAHIDKCLELAEYLYNIIKN	1.25314	Antiinflammatory	-0.07	-0.07	-0.05	-0.5	2996.88	KGTIGFEAHI
QIAMCATGMQRSTLSLSLEQAAILARSH	1.64607	Antiinflammatory	-0.09	0.3	-0.26	1.5	2988.91	QIAMCATGMQ
GLAEGLGGNIEQLVARSNILTLMYQCM	1.06825	Antiinflammatory	0.01	0.45	-0.42	-1	2895.84	GLAEGLGGNI
QSALLRGATIWKYVKDYFPISLVKTAE	0.985239	Antiinflammatory	-0.07	0.07	-0.22	2	3099.04	QSALLRGATI
VSDISFIQSKKMVCFKEPLTTDESN	1.00016	Antiinflammatory	-0.17	-0.31	0.24	-1	2847.61	VSDISFIQSK
SSSEDKITVHFINRDGETLTTKGKIG	1.02408	Antiinflammatory	-0.23	-0.73	0.45	0.5	2834.53	SSSEDKITVH
AMKKLLKKMAYDREKYEKQDKSA	1.44003	Antiinflammatory	-0.47	-1.56	1.05	4	2803.66	AMKKLLKKMA
PRQDYSRTPGQVLSLISSLGFHT	1.29968	Antiinflammatory	-0.16	-0.42	-0.18	1.5	2560.21	PRQDYSRTPG
KQFLSFETNLTESIKAMH	0.98726	Antiinflammatory	-0.14	-0.37	-0.03	0.5	2124.71	KQFLSFETNL
FRRGKSCLFRLQPATLHRLLLRTP	1.04822	Antiinflammatory	-0.29	-0.26	0	6.5	2880.86	FRRGKSCLFR
LDSLLPCTAQQASA	1.15458	Antiinflammatory	-0.03	0.35	-0.31	-1	1417.79	LDSLLPCTAQ
SLSLANIKIWVLTGDKQETA	1.54538	Antiinflammatory	-0.06	0.11	-0.13	0	2187.83	SLSLANIKIW
TCLSMSTLESVTYLP	1.27744	Antiinflammatory	0.03	0.61	-0.59	-1	1645.13	TCLSMSTLES
VVKVGHRQVVNMIRQG	1.00255	Antiinflammatory	-0.19	0	-0.09	3.5	1820.45	VVKVGHRQVV
ALGGISLPLGVIVMTALHSPA	1.42699	Antiinflammatory	0.23	1.43	-0.8	0.5	2017.79	ALGGISLPLG
VAGVVVLILALVLAWLSTYV	1.005	Antiinflammatory	0.37	2.5	-1.35	0	2099.95	VAGVVVLILA
DIMDALILKMAEINKYTLENRE	1.22621	Antiinflammatory	-0.18	-0.3	0.33	-2	2624.4	DIMDALILKM
CFYAQQYDMTLTSFERA	1.01348	Antiinflammatory	-0.15	-0.35	-0.34	-1	2074.54	CFYAQQYDMT
SIILAALVCYWFSTQNHVANMEGEPNEGQTVNG	1.09496	Antiinflammatory	-0.01	-0.03	-0.43	-2.5	3594.5	SIILAALVCY
PHNQMMGPQGQVLLQQNPMIEQIMTNQMQGN	1.1672	Antiinflammatory	-0.15	-0.81	-0.35	-0.5	3537.61	PHNQMMGPQG
HGLLQGQTTTTRGLGFHGNLKLKRFIL	1.4294	Antiinflammatory	-0.12	-0.21	-0.28	5	3007.99	HGLLQGQTTT
QEVKERAISCMGHLVGHLGDR	0.942021	Antiinflammatory	-0.21	-0.41	0.3	1	2336.01	QEVKERAISC
FPPTRQMGILFTWYDSLTGVP	0.905595	Antiinflammatory	0.02	0.08	-0.65	0	2427.13	FPPTRQMGIL
ALFLYHVVFGIQYLGILNG	1.08575	Antiinflammatory	0.26	1.37	-1.26	0.5	2137.87	ALFLYHVVFG
LMVRSLATPVETLTRVGGA	1.35659	Antiinflammatory	-0.04	0.62	-0.22	1	1971.63	LMVRSLATPV
CVTVLIYFLPLLVIGYAYTV	1.33855	Antiinflammatory	0.32	2.04	-1.43	0	2261.12	CVTVLIYFLP
GVDDMVLLPQITEDGIVGNLR	1.57554	Antiinflammatory	-0.03	0.28	0.01	-3	2254.92	GVDDMVLLPQ
SMAYAKLLLTVMTKYQANIT	1.12586	Antiinflammatory	-0.01	0.45	-0.6	2	2261.04	SMAYAKLLLT
SEDAARVLAELEVTMRHALLQEVDIVVA	0.92239	Antiinflammatory	-0.07	0.48	0.12	-3.5	3078.95	SEDAARVLAE
DTHVVTTVENGYLHQ	1.32085	Antiinflammatory	-0.11	-0.52	-0.29	-1	1713.07	DTHVVTTVEN
PFKGFFLAALHGWQLGLTAGLGLGDGSGS	1.27273	Antiinflammatory	0.13	0.5	-0.6	0.5	2875.74	PFKGFFLAAL
PQSKTEMEQSTLLARSPDPKAQVLSSSHKKG	1.13624	Antiinflammatory	-0.31	-1.12	0.51	2.5	3367.25	PQSKTEMEQS
EILEKLLESGATVDFQDRLDCTAMHW	1.17978	Antiinflammatory	-0.13	-0.19	0.13	-3.5	3021.8	EILEKLLESG
KGHAGQRRHLCADCGHSFDWKSQLVIHRK	1.38652	Antiinflammatory	-0.32	-0.97	0.25	6	3372.29	KGHAGQRRHL
PTPRSGCQMTITPQGNIIIYGGYSKQRVRKD	1.13124	Antiinflammatory	-0.25	-0.8	0.08	4	3466.47	PTPRSGCQMT
EMKPNGVSAVEEELTGTEAMGVELMIPR	0.914452	Antiinflammatory	-0.1	-0.2	0.32	-4	3018.89	EMKPNGVSAV
EPRFIAVGYVDDTQFVRFDSDAPDPRME	1.23696	Antiinflammatory	-0.23	-0.66	0.42	-4	3273.96	EPRFIAVGYV
DVKTEAVAIMCKMAPMVGKDITERLILPRFCEM	1.1215	Antiinflammatory	-0.09	0.34	0.14	0	3741.08	DVKTEAVAIM
LGGNADVCQILIENKINPNVQDYAGRT	1.2289	Antiinflammatory	-0.14	-0.34	-0.02	-1	2916.68	LGGNADVCQI
GLEKPMNVLSVLRA	1.34849	Antiinflammatory	-0.08	0.38	-0.05	1	1527.07	GLEKPMNVLS
NYVILVRMERWPCLQ	1.03177	Antiinflammatory	-0.13	0.11	-0.47	1	1920.55	NYVILVRMER
MHDSYDVCLVARMNPRD	1.08136	Antiinflammatory	-0.27	-0.56	0.22	-0.5	2022.53	MHDSYDVCLV
RLPSQDARLKALSTCGS	1.03342	Antiinflammatory	-0.28	-0.44	0.31	2	1803.3	RLPSQDARLK
VLAHTILGVAWNEITGQ	1.13437	Antiinflammatory	0.12	0.69	-0.74	-0.5	1822.37	VLAHTILGVA
LTGIPGGKPAYSFHVTADGQMQ	0.911136	Antiinflammatory	-0.02	-0.23	-0.31	0.5	2275.9	LTGIPGGKPA
LATLNINGLRGHRAQR	0.97965	Antiinflammatory	-0.29	-0.58	0.03	3.5	1790.31	LATLNINGLR
KMYGEYVKGFDNAMELVKNMT	1.25415	Antiinflammatory	-0.15	-0.51	0.08	0	2469.2	KMYGEYVKGF
SYFTSHGVSDLESYLNQL	1.43328	Antiinflammatory	-0.07	-0.32	-0.41	-1.5	2060.47	SYFTSHGVSD
KNHIRVMELLLKMGASID	1.38897	Antiinflammatory	-0.12	0.17	0.08	1.5	2068.81	KNHIRVMELL
QGMDLSANQDEETDQETFQL	1.02045	Antiinflammatory	-0.28	-1.35	0.53	-6	2299.66	QGMDLSANQD
QGKTGEVIKLTDVKDFSLPLW	1.01998	Antiinflammatory	-0.1	-0.2	0.08	0	2375.09	QGKTGEVIKL
ESWLEERRAYLSTISSLKDLITKMQ	1.48977	Antiinflammatory	-0.24	-0.53	0.25	0	2998.82	ESWLEERRAY
LGTYGTEIYQSHGPSGQY	1.19551	Antiinflammatory	-0.08	-0.86	-0.43	-0.5	1958.35	LGTYGTEIYQ
MVQFLSSLEQNGKITLAVLEQEMSKLLDDIIVFNPPDLDSQ	1.409	Antiinflammatory	-0.07	0.08	-0.04	-5	4620.96	MVQFLSSLEQ
MFLAYLRGVQGNSMDQRSLPEDSLNSLIIKLL	1.4793	Antiinflammatory	-0.09	0.12	-0.18	0	3623.75	MFLAYLRGVQ
EGDIVQLEVKVSLENVEG	1.42833	Antiinflammatory	-0.09	-0.06	0.41	-4	1957.45	EGDIVQLEVK
LYLRCDPHGGEEIVSIGILSSARNMEVYLG	1.24619	Antiinflammatory	-0.05	0.18	-0.15	-1.5	3293.24	LYLRCDPHGG
RNHWKKTTAGICLLTWGGHWVYG	1.16582	Antiinflammatory	-0.07	-0.4	-0.6	4	2685.47	RNHWKKTTAG
RFCMTGGNSPICYLKAYHTNLYLSADA	1.07237	Antiinflammatory	-0.07	-0.01	-0.47	1.5	3010.84	RFCMTGGNSP
DLIFHMDKVHYILQEVVMGGMVLETNMNEIVAQIEAQ	1.18865	Antiinflammatory	0.01	0.35	-0.28	-4	4260.59	DLIFHMDKVH
SIQTAMDLRVKFPGIVAGFDLVGR	0.900654	Antiinflammatory	-0.03	0.53	-0.16	1	2591.43	SIQTAMDLRV
LEAGDYADLVKALKKVVGKDTNVMLVALAAKCL	1.14729	Antiinflammatory	-0.03	0.58	0.03	1	3461.68	LEAGDYADLV
LEILVFCILLYFHKRKGMKHIVIL	1.18741	Antiinflammatory	0.08	1.15	-0.62	4	2928.14	LEILVFCILL
PRGRVGIMAASLMGLLLLHTVSWVSGA	0.972785	Antiinflammatory	0.09	0.96	-0.62	2.5	2793.81	PRGRVGIMAA
RKQRYVFDISALEKDGLLGAELR	0.950479	Antiinflammatory	-0.27	-0.5	0.49	1	2678.43	RKQRYVFDIS
ELTLPEASEGDNTGVIL	1.03547	Antiinflammatory	-0.03	-0.01	0.15	-4	1758.17	ELTLPEASEG
SLTGDSMDTLSHLKGLYLNMAS	1.16935	Antiinflammatory	-0.06	0.01	-0.24	-0.5	2355.01	SLTGDSMDTL
HFFNGTERVRFLERSFYN	0.962646	Antiinflammatory	-0.28	-0.82	-0.04	1.5	2319.82	HFFNGTERVR
LLHTILHIPSAKERQ	0.960128	Antiinflammatory	-0.15	-0.18	-0.09	2	1756.32	LLHTILHIPS
GTLPAKLLKKSASVQGFFLNHYL	1.10621	Antiinflammatory	-0.02	0.2	-0.42	3.5	2533.37	GTLPAKLLKK
KKMANSPPVLSKVPGYGLQV	1.0283	Antiinflammatory	-0.09	-0.16	-0.11	3	2113.85	KKMANSPPVL
LGLENLDSPAATKAQIVKALKAMT	1.65134	Antiinflammatory	-0.07	0.2	0.02	1	2484.31	LGLENLDSPA

## Sheet: ANTICANCER
PEPTIDE	SVM SCORE/	PREDICTION	HYDROPHOBICITY	HYDROPATHICITY	HYDROPHILLICITY	CHARGE	MOL. WT.	N TERMINAL 10 AA
RATLKAGDCDCQC	1.4	THP	-0.3	-0.39	0.46	0	1383.74	RATLKAGDCD
MCPPGMHKW	1.71	THP	-0.06	-0.59	-0.5	1.5	1086.48	MCPPGMHKW
TMLPECCF	1.25	THP	0.08	0.96	-0.62	-1	943.26	TMLPECCF
MSPCFLGCVVFCLLQAG	0.92	THP	0.22	1.76	-1.04	0	1788.48	MSPCFLGCVV
RNCLLTRPGPGRV	1.15	THP	-0.33	-0.57	0.21	3	1438.9	RNCLLTRPGP
TPDAGLWSPSPGRR	1.01	THP	-0.26	-1.12	0.25	1	1496.83	TPDAGLWSPS
CRKGTCGMC	2.87	THP	-0.26	-0.06	0.14	2	958.31	CRKGTCGMC
SGPPCPFPALRED	0.95	THP	-0.16	-0.63	0.27	-1	1385.72	SGPPCPFPAL
FPVQSSHAVS	0.93	THP	0	0.23	-0.54	0.5	1058.29	FPVQSSHAVS
FCPRSFCK	1.65	THP	-0.24	-0.03	-0.09	2	987.29	FCPRSFCK
SRSTSTGSAASSGSNSS	0.96	THP	-0.25	-0.81	0.24	1	1530.69	SRSTSTGSAA
VPAVSSVSHTA	1.14	THP	0.06	0.75	-0.5	0.5	1054.31	VPAVSSVSHT
PAGPLPRMDLPPSGQ	1.01	THP	-0.13	-0.65	0.07	0	1532.99	PAGPLPRMDL
FSPNAPAHFSFV	1.04	THP	0.1	0.39	-0.81	0.5	1320.62	FSPNAPAHFS
DRIWYECRRP	1.13	THP	-0.55	-1.73	0.65	1	1393.71	DRIWYECRRP
PLPNLPSAQSLPFCSREFLPV	1.17	THP	-0.03	0.19	-0.38	0	2313.01	PLPNLPSAQS
PPSHPASQPPLPASHPT	1.82	THP	-0.11	-0.99	-0.18	1	1718.13	PPSHPASQPP
GCRRPDDGLRLLSDMR	1.15	THP	-0.46	-0.99	0.85	1	1860.36	GCRRPDDGLR
SGAPPASGHSHRP	1.15	THP	-0.21	-1.18	0.15	2	1257.5	SGAPPASGHS
PYECSQCGRSFTTQTHW	1.04	THP	-0.24	-1.08	-0.29	0.5	2031.44	PYECSQCGRS
QFHRSLRTMS	1.08	THP	-0.39	-0.95	0.03	2.5	1262.59	QFHRSLRTMS
RCAGCGIRTDP	0.92	THP	-0.28	-0.39	0.39	1	1148.46	RCAGCGIRTD
SPSSPETPPP	0.94	THP	-0.19	-1.46	0.35	-1	995.17	SPSSPETPPP
SPSSPPASAPH	1.74	THP	-0.11	-0.84	-0.03	0.5	1034.22	SPSSPPASAP
PSSFSPATMK	0.92	THP	-0.11	-0.37	-0.08	1	1052.33	PSSFSPATMK
GSSPGPTVLSPLPSP	1	THP	0.02	-0.06	-0.29	0	1392.78	GSSPGPTVLS
QAPRGRAPPRPP	1.16	THP	-0.47	-1.82	0.68	3	1299.65	QAPRGRAPPR
CSHQRCHGHG	1.98	THP	-0.35	-1.42	0	2.5	1121.36	CSHQRCHGHG
TCSSAASNNL	0.93	THP	-0.12	-0.02	-0.29	0	967.14	TCSSAASNNL
AASPPSSPAPAS	0.97	THP	-0.03	-0.2	-0.07	0	1039.24	AASPPSSPAP
GTGGYGGGGGYGGRGGYSGGGYG	1.26	THP	0.02	-0.77	-0.27	1	1928.29	GTGGYGGGGG
LPRSAVLLRLPQS	1.46	THP	-0.15	0.3	-0.18	2	1449.95	LPRSAVLLRL
RGRGAGGGRRRAGNPP	1.45	THP	-0.51	-1.75	0.89	5	1591.98	RGRGAGGGRR
SSASMSGGAGRCS	1.34	THP	-0.14	-0.13	0.09	1	1157.4	SSASMSGGAG
GPMPLHGMRGPPPD	1.1	THP	-0.12	-0.91	0.08	0.5	1458.92	GPMPLHGMRG
GSTRGKPGCRRALDLCQC	1.54	THP	-0.35	-0.66	0.44	3	1921.49	GSTRGKPGCR
GPGGRAGGGGGGPGGPP	0.91	THP	0	-0.79	0.15	1	1261.58	GPGGRAGGGG
SASPPRLRDKLSP	0.94	THP	-0.39	-1.09	0.68	2	1423.8	SASPPRLRDK
ARPSALPRRVP	0.98	THP	-0.38	-0.68	0.45	3	1219.59	ARPSALPRRV
PPPPAQEFQTARL	1.14	THP	-0.2	-0.92	0.05	0	1451.82	PPPPAQEFQT
HTSHLLPAARS	1.34	THP	-0.16	-0.33	-0.22	2	1189.49	HTSHLLPAAR
SPAFQDHPL	1.18	THP	-0.09	-0.64	-0.2	-0.5	1011.22	SPAFQDHPL
PPHLPGPPPG	1.03	THP	0	-0.98	-0.23	0.5	965.26	PPHLPGPPPG
LCAPPARPTPSAPPAP	1.02	THP	-0.07	-0.23	-0.12	1	1543.01	LCAPPARPTP
GRPLPSPSYGHP	1.53	THP	-0.17	-1.17	-0.08	1.5	1264.57	GRPLPSPSYG
AAMNPCMSP	1.59	THP	0	0.27	-0.46	0	921.22	AAMNPCMSP
RGSSPSSCGSS	0.97	THP	-0.28	-0.84	0.35	1	1011.16	RGSSPSSCGS
SAVWGPLGEC	0.91	THP	0.11	0.47	-0.49	-1	1018.29	SAVWGPLGEC
LTLWMAGWY	1.56	THP	0.26	0.79	-1.66	0	1140.5	LTLWMAGWY
PMAPSSMASHHHHHPH	2.48	THP	-0.15	-1.19	-0.36	3	1798.22	PMAPSSMASH
GSMHASSHRGHQPWL	1.79	THP	-0.18	-1.05	-0.29	2.5	1688.08	GSMHASSHRG
LMGSPNSHPS	1.58	THP	-0.1	-0.7	-0.25	0.5	1026.27	LMGSPNSHPS
SRVVVLLVLLCCA	1.18	THP	0.2	2.58	-0.95	1	1388	SRVVVLLVLL
SGGSGGMGGSGGGGGSGGGS	0.98	THP	0.06	-0.39	0.01	0	1383.64	SGGSGGMGGS
RTGPLGCN	1.31	THP	-0.22	-0.6	0	1	817.04	RTGPLGCN
SPCPTPPHPPPTPQ	1.09	THP	-0.16	-1.37	-0.13	0.5	1452.83	SPCPTPPHPP
PPPMSSAMMQS	2.12	THP	-0.06	-0.29	-0.3	0	1163.53	PPPMSSAMMQ
ERCTGHSSG	0.95	THP	-0.35	-1.31	0.52	0.5	933.08	ERCTGHSSG
RDHGGCSPHANCT	1.39	THP	-0.29	-1.15	0.2	1	1354.61	RDHGGCSPHA
ETGLWQCP	1.38	THP	-0.06	-0.54	-0.42	-1	933.16	ETGLWQCP
SSLHASSFTPGTSPTSV	1.14	THP	-0.03	-0.06	-0.36	0.5	1663	SSLHASSFTP
FPPLWPHSTTTTSPSLPL	1.64	THP	0.02	-0.17	-0.69	0.5	1979.52	FPPLWPHSTT
STFSHFSLFHMAAN	1.12	THP	0.05	0.34	-0.85	1	1596.97	STFSHFSLFH
FCHCPPGFQGSICQ	1.2	THP	0.02	0.19	-0.69	0.5	1523.96	FCHCPPGFQG
VCARLMLGCY	1.42	THP	0.06	1.43	-0.82	1	1128.57	VCARLMLGCY
RDATATPPSSPSMSS	1.15	THP	-0.24	-0.85	0.29	0	1491.77	RDATATPPSS
LFVYWSFLLRF	1.44	THP	0.21	1.5	-1.53	1	1490.97	LFVYWSFLLR
PRPRAGPRGPR	1.34	THP	-0.61	-2.13	1.05	4	1216.55	PRPRAGPRGP
PALCLPPPPAPGPMGN	1.16	THP	0.07	0.01	-0.42	0	1529.07	PALCLPPPPA
WTSPSWNGASERASS	1.3	THP	-0.21	-1.09	-0.03	0	1622.86	WTSPSWNGAS
GCTPGAHVDCGWLAC	1.47	THP	0.08	0.53	-0.57	-0.5	1489.91	GCTPGAHVDC
PHSWCLPP	2.74	THP	0.01	-0.43	-0.8	0.5	936.2	PHSWCLPP
RCGHKQMVPCS	0.98	THP	-0.29	-0.62	0.11	2.5	1245.65	RCGHKQMVPC
PRVLAGFLFFSWTACWSLPLP	1.72	THP	0.16	0.96	-1.04	1	2409.19	PRVLAGFLFF
HAHQHHPHSHPAQQPP	1.54	THP	-0.28	-2.08	-0.19	3	1843.2	HAHQHHPHSH
RCPVCGRGFGHR	1.53	THP	-0.34	-0.62	0.21	3.5	1344.74	RCPVCGRGFG
APTLRARRL	0.93	THP	-0.44	-0.51	0.44	3	1053.39	APTLRARRL
SQSMFSAPSSISSMTMPSS	1.25	THP	-0.05	0.01	-0.33	0	1950.43	SQSMFSAPSS
SPVRRRRRSSASL	0.99	THP	-0.66	-1.35	0.95	5	1527.91	SPVRRRRRSS
LQFTRFWIFSILYAIWW	0.91	THP	0.21	1.05	-1.55	1	2291	LQFTRFWIFS
QTKPSTAPASGSSLRHWNL	0.9	THP	-0.21	-0.87	-0.09	2.5	2038.52	QTKPSTAPAS
SWRPGRRGPSSGG	1.56	THP	-0.4	-1.66	0.5	3	1356.64	SWRPGRRGPS
SSATTVTSKAAPSWPESHSST	1.17	THP	-0.15	-0.64	-0.02	0.5	2119.5	SSATTVTSKA
PASGFFRSLMS	1.18	THP	-0.02	0.38	-0.43	1	1199.53	PASGFFRSLM
CRCLVRAPLVSDV	0.91	THP	-0.12	0.93	-0.1	1	1430.92	CRCLVRAPLV
SLLPPADPLRQANRL	1.32	THP	-0.23	-0.42	0.1	1	1661.15	SLLPPADPLR
FCDMCNLAVHQEC	1.2	THP	-0.06	0.37	-0.36	-1.5	1512.93	FCDMCNLAVH
ARCPDCSADRPG	1.01	THP	-0.38	-0.98	0.78	0	1247.5	ARCPDCSADR
PTGGGGGGGSGGTR	0.99	THP	-0.07	-0.85	0.18	1	1074.29	PTGGGGGGGS
PAPCSELVRCFN	1.16	THP	-0.12	0.17	-0.15	0	1335.71	PAPCSELVRC
QDCHSHSRTSLQSS	1.3	THP	-0.4	-1.41	0.26	1	1572.82	QDCHSHSRTS
LRPGQPGLPPFL	1.91	THP	-0.02	-0.08	-0.39	1	1291.74	LRPGQPGLPP
VPQLYSFLRRP	1.41	THP	-0.22	-0.29	-0.31	2	1375.79	VPQLYSFLRR
SASRSGPGGSGSGGR	0.95	THP	-0.25	-1.01	0.47	2	1276.49	SASRSGPGGS
PPPPPVARPVPLPMPDSK	1.08	THP	-0.13	-0.62	0.15	1	1892.53	PPPPPVARPV
AGYCSFHSPMVCRL	1.35	THP	-0.02	0.49	-0.63	1.5	1571.05	AGYCSFHSPM
PPPPPGLSSSGV	1.09	THP	0.02	-0.27	-0.2	0	1091.39	PPPPPGLSSS
LMVSARSSLPRA	1.2	THP	-0.17	0.36	-0.04	2	1287.7	LMVSARSSLP
PHSPLPGHLGSSPLDSPRN	1.53	THP	-0.18	-0.97	0.05	1	1965.43	PHSPLPGHLG
PPPPPSGTPDAGLWSPSPGRRR	1.17	THP	-0.27	-1.34	0.31	2	2282.84	PPPPPSGTPD
PSRGGCTLGMASR	1.26	THP	-0.21	-0.32	0.12	2	1292.67	PSRGGCTLGM
GSSVASAPVSSFPRTS	1.13	THP	-0.08	0.08	-0.13	1	1536.86	GSSVASAPVS
QSQPLPPNTT	1.36	THP	-0.23	-1.37	-0.17	0	1082.32	QSQPLPPNTT
GFGGLGGPGGFGGPGGFGPG	0.98	THP	0.21	0.11	-0.47	0	1606.05	GFGGLGGPGG
ALPSVMRFCCCV	1.81	THP	0.06	1.61	-0.73	1	1328.84	ALPSVMRFCC
PPPPGVQPFSVPLS	1.09	THP	0.05	-0.01	-0.46	0	1418.85	PPPPGVQPFS
PCPMDSRPCRH	1.98	THP	-0.43	-1.31	0.5	1.5	1298.65	PCPMDSRPCR
DYEGAPWNCDSCTFLNHPALNRC	1	THP	-0.17	-0.63	-0.17	-1.5	2627.19	DYEGAPWNCD
MAAPGARSCN	0.91	THP	-0.15	-0.1	-0.03	1	977.24	MAAPGARSCN
RRLPPGPSVPPSSSSSSSSSSSSSA	1.2	THP	-0.24	-0.75	0.26	2	2375.8	RRLPPGPSVP
GGGGGNFGGGGPPGL	0.97	THP	0.13	-0.27	-0.27	0	1157.45	GGGGGNFGGG
QDPRPSSPTAL	0.92	THP	-0.3	-1.18	0.37	0	1168.41	QDPRPSSPTA
TNCTCSGGRWTCQEA	1.59	THP	-0.23	-0.69	-0.09	0	1616.96	TNCTCSGGRW
DPGAGQSWRW	0.98	THP	-0.22	-1.47	-0.08	0	1159.36	DPGAGQSWRW
RLPRQFCRSCGV	1.55	THP	-0.36	-0.33	0.14	3	1421.86	RLPRQFCRSC
HHPRPLPVL	1.25	THP	-0.13	-0.43	-0.34	2	1065.42	HHPRPLPVL
RRPGTSVVSSASMS	1.31	THP	-0.24	-0.26	0.16	2	1421.77	RRPGTSVVSS
VGVGLVDCHC	1.01	THP	0.14	1.39	-0.58	-0.5	1001.33	VGVGLVDCHC
MPEPGPRMNGFS	1	THP	-0.17	-0.94	0.12	0	1319.68	MPEPGPRMNG
LEDTPRQCRICGGLAMYECRECY	1.36	THP	-0.26	-0.47	0.22	-1	2710.45	LEDTPRQCRI
SSAPSSAVPAAS	1.16	THP	0.01	0.35	-0.17	0	1031.22	SSAPSSAVPA
RWLQGSSPPLRM	1.96	THP	-0.25	-0.76	-0.13	2	1427.86	RWLQGSSPPL
CHMQRLSARQPPANYL	1.15	THP	-0.28	-0.77	-0.17	2.5	1885.42	CHMQRLSARQ
SGPPDSLSDHFTLSFWM	1	THP	-0.01	-0.21	-0.41	-1.5	1924.35	SGPPDSLSDH
PPPAPLMAQPPPLGAP	1.12	THP	0.06	-0.11	-0.39	0	1551.1	PPPAPLMAQP
CYYNGEVTSMCW	1.03	THP	-0.02	-0.11	-0.81	-1	1455.8	CYYNGEVTSM
LLSQSSWHPLSPE	1.24	THP	-0.07	-0.47	-0.38	-0.5	1480.83	LLSQSSWHPL
MRSHGGMRASPSLK	0.99	THP	-0.3	-0.82	0.32	3.5	1514.98	MRSHGGMRAS
CSTCSGRGNKTCA	1.87	THP	-0.28	-0.49	0.19	2	1287.61	CSTCSGRGNK
PSANPPPPQAHRRLRRSHS	1.61	THP	-0.49	-1.81	0.5	5	2161.67	PSANPPPPQA
GGYGGGGLGGAGFRGGN	1.18	THP	0.05	-0.31	-0.23	1	1410.74	GGYGGGGLGG
NASSHSTSGFASTF	0.94	THP	-0.06	-0.24	-0.4	0.5	1400.6	NASSHSTSGF
DLGRLLSGGRGHRG	1.15	THP	-0.3	-0.83	0.46	2.5	1450.84	DLGRLLSGGR
SYSPTQRSPGCRPLPSA	1.09	THP	-0.28	-0.96	0.08	2	1804.23	SYSPTQRSPG
LFNSSRLHLPRPSA	1.6	THP	-0.22	-0.38	-0.13	2.5	1595.03	LFNSSRLHLP
WSWTGGLVVGLVVTSSL	0.92	THP	0.23	1.26	-1.06	0	1761.32	WSWTGGLVVG
LSPPALPPPAPSPP	1.63	THP	0.03	-0.23	-0.29	0	1337.76	LSPPALPPPA
PSPAPSAQAPGSSSPTHMQ	0.97	THP	-0.13	-0.84	-0.09	0.5	1835.23	PSPAPSAQAP
RAAGGGGGGGGGGGGGGAGGGGGGGAGGGAGGGGRSPVRELD	1.06	THP	0	-0.41	0.23	1	3080.79	RAAGGGGGGG
YGGFGGRGGGFGGGLGVGGGSFGGGRFGGGGGFGGLGGPGG	1.22	THP	0.13	0.05	-0.33	2	3337.23	YGGFGGRGGG
GSGGGGGGSGGNGVGGGGAGGAGGGGGGGSRAP	1.07	THP	0.05	-0.35	0.03	1	2271.75	GSGGGGGGSG
RRALVGPGSPPPPPPPPPLPA	1.26	THP	-0.1	-0.61	0.01	2	2067.75	RRALVGPGSP
GFGGVGRMGGGGMGGMNSVTGGMGMGLDR	0.9	THP	0.02	0.05	-0.16	1	2661.53	GFGGVGRMGG
RLPPPLLSPVPSPPLASPPHL	2.12	THP	-0.01	0.02	-0.36	1.5	2182.94	RLPPPLLSPV
PPPPPPPPAQAPPLHPYKCTMCNYSTTTLKGLR	0.95	THP	-0.15	-0.75	-0.2	3.5	3572.69	PPPPPPPPAQ
PMRPPAFLQQGMMGPHHRMMSPAQSTM	1.3	THP	-0.15	-0.57	-0.27	3	3054.07	PMRPPAFLQQ
PPSPCPGSHERPQHPPVPARKAQRRLF	0.9	THP	-0.36	-1.36	0.38	5	3043.88	PPSPCPGSHE
LADSGEGRNMACSCPSSGSSCCGPAGT	0.92	THP	-0.12	-0.17	0.07	-1	2506.08	LADSGEGRNM
LEPEPARPPLSALAPPHSSPDP	0.92	THP	-0.14	-0.75	0.25	-1.5	2275.84	LEPEPARPPL
PGVCGAGTPCRGLCS	1.46	THP	-0.02	0.43	-0.26	1	1377.82	PGVCGAGTPC
ECCVEFCQ	2.66	THP	-0.08	0.5	-0.1	-2	960.2	ECCVEFCQ
SIPNVHSSPMP	1.4	THP	-0.05	-0.3	-0.36	0.5	1165.48	SIPNVHSSPM
YRCSRCQKAFL	1.2	THP	-0.37	-0.46	0.04	3	1374.78	YRCSRCQKAF
CHWSSSSGSSSSEEMF	1.06	THP	-0.14	-0.67	-0.02	-1.5	1734.99	CHWSSSSGSS
SHSHSPMSTRRRH	1.92	THP	-0.58	-2.05	0.54	4.5	1575.9	SHSHSPMSTR
SISPDCSMLCSAA	1.14	THP	0.02	0.81	-0.28	-1	1284.64	SISPDCSMLC
TWNRRNGMPASLHL	1.14	THP	-0.26	-0.88	-0.21	2.5	1653.1	TWNRRNGMPA
RNSSQSSSMSRGGRRLGSR	1.02	THP	-0.56	-1.61	0.76	5	2066.5	RNSSQSSSMS
LCRQRECASLCP	2.42	THP	-0.31	-0.12	0.2	1	1378.8	LCRQRECASL
VRSPGSRFASS	1.12	THP	-0.28	-0.49	0.25	2	1150.39	VRSPGSRFAS
HCQKICEPLGGYHPWPY	1.17	THP	-0.08	-0.77	-0.49	1	2028.59	HCQKICEPLG
WSSPPQCVGLPCGLPPYIQ	1.03	THP	0.05	0.09	-0.72	0	2042.68	WSSPPQCVGL
LCDTCTTLWAFL	1.01	THP	0.14	1.21	-1	-1	1386.81	LCDTCTTLWA
SPGHGLPSPLTPPNP	1.41	THP	-0.05	-0.79	-0.25	0.5	1467.86	SPGHGLPSPL
PCCCCCSSWARPPRRG	2.86	THP	-0.31	-0.43	0.04	3	1782.31	PCCCCCSSWA
SGTGRGRPRG	1.4	THP	-0.52	-1.82	0.89	3	1000.22	SGTGRGRPRG
GGGGGSAGSGSGGKKG	0.94	THP	-0.07	-0.78	0.4	2	1177.44	GGGGGSAGSG
LIRGHRFCLWGSV	0.99	THP	-0.04	0.53	-0.62	2.5	1544.05	LIRGHRFCLW
YCSAFHSNCHSA	1.93	THP	-0.08	-0.18	-0.64	1	1326.57	YCSAFHSNCH
GRGRSVSGGRGRGGPRG	1.76	THP	-0.45	-1.45	0.83	5	1626.02	GRGRSVSGGR
MVRSFTMPSSSRPLSVAS	1.31	THP	-0.13	0.16	-0.17	2	1940.5	MVRSFTMPSS
WPALYPPGRSSLHHAQ	1.78	THP	-0.12	-0.76	-0.47	2	1817.27	WPALYPPGRS
GGWGGGRGGGAGKGAGGDGGGPGGKGGFGARTRGF	1.2	THP	-0.08	-0.73	0.22	4	2948.68	GGWGGGRGGG
GYGKGHSGGGGGGGGGGSGGGPGIK	1.01	THP	0.01	-0.71	0.08	2.5	1929.41	GYGKGHSGGG
KRPPGFSPFRS	1.11	THP	-0.36	-1.28	0.42	3	1275.61	KRPPGFSPFR
SLCDLAHGCCAPDGSCRCDPGWEGLH	1.68	THP	-0.1	-0.18	-0.01	-2	2703.37	SLCDLAHGCC
RAYLCRVRPPHPASSSVCASPSPPPH	1.44	THP	-0.21	-0.53	-0.04	4	2770.52	RAYLCRVRPP
AAALGSPVSSSPTPPPLPATHSFTRS	0.99	THP	-0.05	-0.11	-0.25	1.5	2534.17	AAALGSPVSS
MWCPLRPLLLALLLASACRTLG	1	THP	0.08	1.26	-0.76	2	2412.39	MWCPLRPLLL
WFLSSLTVFITSWMATCVLLCCS	1.06	THP	0.21	1.64	-1.24	0	2612.51	WFLSSLTVFI
LPQLPSLMPPLLTTM	1.05	THP	0.11	0.71	-0.79	0	1652.32	LPQLPSLMPP
APPCSPSTSLSSTS	1.31	THP	-0.09	-0.21	-0.16	0	1321.59	APPCSPSTSL
LLGPAPARSFGQLPL	1.16	THP	0.04	0.48	-0.48	1	1537.06	LLGPAPARSF
LGLLSGPRSAH	1.03	THP	-0.05	0.14	-0.25	1.5	1107.44	LGLLSGPRSA
QARTLTLQPPRSPPPAPPPPP	1.59	THP	-0.22	-1.1	0.06	2	2215.87	QARTLTLQPP
TASSSSVPAPSPGVPRRS	1.09	THP	-0.21	-0.52	0.19	2	1740.13	TASSSSVPAP
RRLPRPGSARPAPPRV	1.15	THP	-0.48	-1.26	0.69	5	1783.32	RRLPRPGSAR
LVSRSSVSHS	1.78	THP	-0.18	0.05	-0.08	1.5	1058.29	LVSRSSVSHS
GPAKLSPCCHSPAPKPPPA	0.95	THP	-0.11	-0.53	0.04	2.5	1855.45	GPAKLSPCCH
RPRRAALRVLSSL	1.2	THP	-0.38	-0.15	0.36	4	1494.98	RPRRAALRVL
SFSRRNSLAGPSAGP	0.93	THP	-0.23	-0.63	0.14	2	1503.83	SFSRRNSLAG
RRPRLASFGGMG	1.45	THP	-0.29	-0.57	0.27	3	1304.7	RRPRLASFGG
LRPTPPCES	1.1	THP	-0.27	-0.89	0.34	0	999.26	LRPTPPCES
WVNRSLPLWGLQV	1.4	THP	0.01	0.28	-0.88	1	1568.06	WVNRSLPLWG
MGAASGRRSPPLLLPLLLLLLPPPPVILEL	0.96	THP	0.1	1	-0.53	1	3158.46	MGAASGRRSP
PFCCGCFESLYAEYCETCGEHIG	1.2	THP	0	0.18	-0.32	-3.5	2562.19	PFCCGCFESL
RGSGCSVSCMNGGSCRG	2	THP	-0.2	-0.24	0.09	2	1618.04	RGSGCSVSCM
VCFFGYPPFKYSHP	0.97	THP	0.05	-0.04	-0.84	1.5	1689.15	VCFFGYPPFK
QMPPAPLQPLAQL	1.3	THP	0	0	-0.55	0	1403.9	QMPPAPLQPL
GCCSTWWAGD	2.34	THP	0.02	-0.08	-0.64	-1	1085.3	GCCSTWWAGD
GGSPGRSRRG	1.73	THP	-0.52	-1.83	0.96	3	986.19	GGSPGRSRRG
ACYSGWME	1.88	THP	0.03	-0.09	-0.65	-1	946.16	ACYSGWME
QACTTQVWT	0.96	THP	-0.08	-0.17	-0.8	0	1037.28	QACTTQVWT
HSFQHPFLQA	1.5	THP	-0.05	-0.46	-0.76	1	1211.49	HSFQHPFLQA
SLPRSLSSSGF	1.02	THP	-0.12	-0.01	-0.15	1	1137.4	SLPRSLSSSG
GQLLSPPLLLSV	1	THP	0.17	1.21	-0.81	0	1236.71	GQLLSPPLLL
SVMPSSVASPQVHL	0.91	THP	0.03	0.5	-0.51	0.5	1438.86	SVMPSSVASP
TPLHDSASSGHR	1.13	THP	-0.28	-1.16	0.27	1	1264.48	TPLHDSASSG
SASSSSLSSKSSATPSASGR	0.91	THP	-0.23	-0.53	0.28	2	1842.15	SASSSSLSSK
GGDRAPSRRRDCG	1	THP	-0.62	-1.87	1.29	2	1402.67	GGDRAPSRRR
CCASPPGSRTPL	1.54	THP	-0.14	-0.12	-0.09	1	1188.53	CCASPPGSRT
GFPPLPPPPPQLPT	1.44	THP	0.03	-0.5	-0.45	0	1454.93	GFPPLPPPPP
MCPSMNLFSHGTRM	1.14	THP	-0.1	-0.05	-0.45	1.5	1612.13	MCPSMNLFSH
SFSKHHLSPSKKS	0.9	THP	-0.33	-1.32	0.4	4	1469.84	SFSKHHLSPS
GGNGGWGGLGGAQHC	1.06	THP	0.05	-0.41	-0.45	0.5	1327.64	GGNGGWGGLG
TTSYTPSSTPHPSA	1.12	THP	-0.15	-0.96	-0.26	0.5	1433.67	TTSYTPSSTP
PFSPPPSKPKSPNQAALAP	1.03	THP	-0.15	-0.86	0.08	2	1931.47	PFSPPPSKPK
QLQPMPYHSPSSGTASSPSLATRMHPGQ	0.98	THP	-0.16	-0.81	-0.21	2	2951.69	QLQPMPYHSP
QPRPLGHMMDSRVMRPPLPP	1.41	THP	-0.26	-0.85	0.15	2.5	2313.09	QPRPLGHMMD
FRQDLCPPPPPHMPLAFGPPPPR	1.96	THP	-0.13	-0.7	-0.12	1.5	2565.37	FRQDLCPPPP
HMANTILPHSHSHHLH	1.53	THP	-0.09	-0.68	-0.61	3	1869.35	HMANTILPHS
SAHGMTH	1.48	THP	-0.08	-0.66	-0.41	1	739.9	SAHGMTH
APSPGARWLGSALHGRGP	1.1	THP	-0.1	-0.45	-0.13	2.5	1787.27	APSPGARWLG
PASSNLASSHMGSCLLPNSLS	1.02	THP	-0.03	0.18	-0.4	0.5	2073.62	PASSNLASSH
WASRCPQPEPLLVPQK	0.93	THP	-0.2	-0.68	-0.02	1	1849.41	WASRCPQPEP
SVLRASGPGAASLWSASRRF	1.31	THP	-0.14	0.05	-0.12	3	2076.61	SVLRASGPGA
PAPMPQPPPPPPPQ	1.17	THP	-0.11	-1.38	-0.1	0	1447.9	PAPMPQPPPP
ATKNPWSCIFCQ	1	THP	-0.07	-0.07	-0.57	1	1397.79	ATKNPWSCIF
CFCDKCCGQKVALRR	1.96	THP	-0.33	-0.11	0.33	3	1730.31	CFCDKCCGQK
GSALGPGGGGGGGGGGGGPGH	0.97	THP	0.11	-0.36	-0.12	0.5	1476.83	GSALGPGGGG
PSYPSSGSGSSSSSSSTSHLASP	1.02	THP	-0.13	-0.68	-0.07	0.5	2141.44	PSYPSSGSGS
PWSPSLPASSDHSTPASQSPHSS	1.74	THP	-0.16	-0.99	-0.07	0	2347.74	PWSPSLPASS
LGPVSRSAGLLGGRWLQGSRAWLG	1.31	THP	-0.06	0.07	-0.34	3	2495.26	LGPVSRSAGL
PFPPPPPTATSHNNTLPHP	1.59	THP	-0.11	-1.09	-0.33	1	2019.51	PFPPPPPTAT
DPGMGGMGGMGGGMGGGMF	1.24	THP	0.15	0.15	-0.32	-1	1661.24	DPGMGGMGGM
TSPQHLSGGLPGPPPWAPA	0.9	THP	0.01	-0.5	-0.43	0.5	1867.37	TSPQHLSGGL
LRGGAERGEFPYLGRLR	0.96	THP	-0.31	-0.79	0.43	2	1947.48	LRGGAERGEF
PSPGPSALSPGSSGLSNSHTPVRPPST	1.07	THP	-0.13	-0.66	-0.05	1.5	2572.16	PSPGPSALSP
RCSSGSSSSGSSSGS	0.94	THP	-0.26	-0.75	0.33	1	1319.46	RCSSGSSSSG
SWSVEVVAEWHWV	1.53	THP	0.1	0.32	-0.82	-1.5	1613.98	SWSVEVVAEW
PAPLFTPPVLPPFPLMP	1.61	THP	0.18	0.67	-0.83	0	1831.53	PAPLFTPPVL
KAWLWMDGTPYS	0.91	THP	-0.03	-0.54	-0.57	0	1454.83	KAWLWMDGTP
QPPPSGSLACPSHPG	1.1	THP	-0.07	-0.65	-0.18	0.5	1431.79	QPPPSGSLAC
HPPPAQSWPAQLPPRASLPG	1.58	THP	-0.11	-0.79	-0.25	1.5	2104.68	HPPPAQSWPA
GNQGGGYGGGGGGYDGY	0.95	THP	-0.01	-1.11	-0.21	-1	1492.71	GNQGGGYGGG
TLSALPRGTPTSWVVMWGFRW	1.26	THP	0	0.15	-0.75	2	2449.18	TLSALPRGTP
PPSRPAVPRTQLQPEPPS	1	THP	-0.3	-1.29	0.32	1	1954.46	PPSRPAVPRT
HCQFSAQPPPSLQ	1.32	THP	-0.14	-0.71	-0.39	0.5	1439.79	HCQFSAQPPP
QFTDPRLHH	1.05	THP	-0.34	-1.51	0.06	1	1150.39	QFTDPRLHH
PWALGTLLRPSELRRS	1.39	THP	-0.24	-0.43	0.07	2	1852.4	PWALGTLLRP
SSVSSSSSSAPSW	1.45	THP	-0.1	-0.28	-0.21	0	1255.41	SSVSSSSSSA
GAFRGGGGSGPRL	1.24	THP	-0.12	-0.42	0.12	2	1188.5	GAFRGGGGSG
SLSPPPSTGSLSNS	0.9	THP	-0.1	-0.47	-0.14	0	1330.6	SLSPPPSTGS
SPTGLSGVGKCSRC	1	THP	-0.16	-0.09	0.09	2	1351.75	SPTGLSGVGK
TATTASPAASHPLASSPLSGPPSP	0.99	THP	-0.02	-0.15	-0.25	0.5	2202.72	TATTASPAAS
LPRMTGLRGLWL	1.28	THP	-0.06	0.34	-0.53	2	1412.95	LPRMTGLRGL
LSVRPGPPPIRPGPPPIRP	1.2	THP	-0.17	-0.66	0.13	3	2000.69	LSVRPGPPPI
SPSPFTPPPPQT	1.15	THP	-0.12	-1.11	-0.21	0	1252.54	SPSPFTPPPP
SPTRPNFHQNCRL	1.52	THP	-0.41	-1.41	0.05	2.5	1569.94	SPTRPNFHQN
PRPGQLANGFFL	1.12	THP	-0.03	-0.04	-0.48	1	1316.7	PRPGQLANGF
SASMSGGAGRCSSG	1.2	THP	-0.12	-0.15	0.09	1	1214.47	SASMSGGAGR
GCPLGPAPLLS	1.15	THP	0.16	0.85	-0.6	0	1024.4	GCPLGPAPLL
LGSRPLSTAMPPPPG	1.16	THP	-0.06	-0.29	-0.15	1	1477.95	LGSRPLSTAM
QCDAVNLAFGRRC	0.93	THP	-0.24	-0.04	0.05	1	1452.84	QCDAVNLAFG
APAPSTRRPPAPNLHV	0.93	THP	-0.22	-0.74	0.05	2.5	1681.14	APAPSTRRPP
CCGGGGGGSGSTRP	1.38	THP	-0.1	-0.44	0.09	1	1152.42	CCGGGGGGSG
RGLQAPAPGPPSPHSFL	1.28	THP	-0.07	-0.45	-0.22	1.5	1729.21	RGLQAPAPGP
EPLPPSSPLQK	1	THP	-0.2	-1.03	0.29	0	1192.53	EPLPPSSPLQ
VPFLTSASPLLPPA	1.15	THP	0.16	0.95	-0.73	0	1409.88	VPFLTSASPL
GGSRGGGGYGGS	1.32	THP	-0.08	-0.88	0.11	1	968.13	GGSRGGGGYG
RAASPAPSSAPSHASS	1.24	THP	-0.17	-0.52	0.11	1.5	1480.74	RAASPAPSSA
GQPHGGGWGQPHGGGWGQPRGGGGWGQGG	0.94	THP	-0.06	-1.34	-0.26	2	2724.32	GQPHGGGWGQ
PPMPPGIMPPMLPPMGAPP	1.39	THP	0.11	0.05	-0.49	0	1925.73	PPMPPGIMPP
FRYRCQQCHNYQ	1.29	THP	-0.49	-1.75	-0.23	2.5	1646	FRYRCQQCHN
GRLGPRPGRWGTVMGLEG	0.95	THP	-0.17	-0.58	0.1	2	1896.48	GRLGPRPGRW
FPGRLPAAPAR	0.96	THP	-0.15	-0.2	0.02	2	1152.5	FPGRLPAAPA
LMGQPPPSAP	1.14	THP	0	-0.36	-0.31	0	994.31	LMGQPPPSAP
RPMPFQFPPFPD	2.23	THP	-0.12	-0.77	-0.22	0	1475.88	RPMPFQFPPF
LSMGRSPAYW	2	THP	-0.08	-0.28	-0.57	1	1167.48	LSMGRSPAYW
RGSGGGGGRGGRGNGAE	1.54	THP	-0.29	-1.38	0.71	2	1458.73	RGSGGGGGRG
GGYGGGFGGGRG	1.45	THP	0.03	-0.55	-0.15	1	998.21	GGYGGGFGGG
SAPQSIGSSSSSSSSSHC	0.95	THP	-0.16	-0.48	-0.02	0.5	1682.92	SAPQSIGSSS
SPTPSMMPSPNSHTAGF	1.39	THP	-0.07	-0.57	-0.32	0.5	1746.17	SPTPSMMPSP
MGTHSACRNGGCSGG	1.51	THP	-0.14	-0.45	-0.06	1.5	1394.73	MGTHSACRNG
ARPPGPRNTLW	1.77	THP	-0.29	-1.25	0.01	2	1264.6	ARPPGPRNTL
TCALSGLACACR	1.79	THP	-0.01	1.18	-0.43	1	1168.56	TCALSGLACA
CSEQRCPAPYEICP	1.51	THP	-0.22	-0.58	0.14	-1	1596	CSEQRCPAPY
SWASAPLSMF	1.81	THP	0.14	0.72	-0.91	0	1096.39	SWASAPLSMF
KWHNLPAHQ	0.96	THP	-0.24	-1.58	-0.37	2	1130.41	KWHNLPAHQ
LPSSSQTLPASA	1.01	THP	-0.04	0.05	-0.3	0	1158.43	LPSSSQTLPA
LPLLHLAFRASSSQA	0.91	THP	-0.01	0.55	-0.51	1.5	1611.09	LPLLHLAFRA
SFSPSLSPLAARSPVVSPFG	1.15	THP	0.02	0.45	-0.39	1	2003.55	SFSPSLSPLA
PPPASKPPSLSRKSSV	1.08	THP	-0.27	-0.91	0.42	3	1635.1	PPPASKPPSL
STPRHHSNHR	1.93	THP	-0.61	-2.6	0.49	3.5	1228.43	STPRHHSNHR
PAPPLVGLPPPP	1.16	THP	0.13	0.17	-0.47	0	1151.58	PAPPLVGLPP
PLRTLQPGAFACFPE	0.93	THP	-0.03	0.13	-0.32	0	1647.13	PLRTLQPGAF
RGLWNLAARTCCL	1.86	THP	-0.13	0.42	-0.46	2	1476.96	RGLWNLAART
PPARRTSPASGLWSP	1.59	THP	-0.21	-0.83	0.02	2	1579.97	PPARRTSPAS
RGGVGGAGEGVGG	1.12	THP	0.02	-0.08	0.19	0	1029.28	RGGVGGAGEG
SDCAAGLCCA	1.74	THP	0.06	1.2	-0.3	-1	913.16	SDCAAGLCCA
TGMHSTHRM	1.48	THP	-0.28	-1.08	-0.12	2	1057.34	TGMHSTHRM
VAWYNALLPP	1	THP	0.17	0.65	-1.16	0	1143.49	VAWYNALLPP
TMPPPTHTAFSGHHLP	1.05	THP	-0.03	-0.56	-0.53	1.5	1728.19	TMPPPTHTAF
DFLSCMSRRSGLPRW	1.82	THP	-0.29	-0.5	0.07	2	1811.31	DFLSCMSRRS
FSPHIFWGPSPHGFFWAPQPS	1.67	THP	0.09	-0.26	-0.9	1	2427.02	FSPHIFWGPS
FMPPPGIPPPFPPMGLPPM	1.56	THP	0.15	0.15	-0.66	0	2017.81	FMPPPGIPPP
YSFPWAHTHL	2.19	THP	0.05	-0.33	-1.16	1	1258.54	YSFPWAHTHL
RSSITMTPPASP	0.96	THP	-0.16	-0.41	-0.04	1	1244.58	RSSITMTPPA
CTGPNGCS	1.6	THP	-0.09	-0.3	-0.24	0	737.9	CTGPNGCS
QCVQTFCCQ	1.56	THP	-0.11	0.37	-0.76	0	1059.36	QCVQTFCCQ
TGERPYACPHCS	1.12	THP	-0.24	-0.9	0.05	0.5	1320.61	TGERPYACPH
KCRSGRCVLASRRC	1.79	THP	-0.5	-0.47	0.63	5	1595.11	KCRSGRCVLA
GGGGGGGGGPGGSASGPGGSGGGKT	0.91	THP	0.03	-0.61	0.12	1	1744.12	GGGGGGGGGP
TQCLPTPAAWFAH	1.18	THP	0.05	0.18	-0.87	0.5	1442.83	TQCLPTPAAW
PPPLPPSAGPPPPPP	1.11	THP	-0.01	-0.88	-0.13	0	1414.86	PPPLPPSAGP
HGSCPPTPSP	1.29	THP	-0.12	-0.98	-0.13	0.5	979.2	HGSCPPTPSP
PPPLPEPLTTLPPPPAGPP	1.04	THP	0.01	-0.51	-0.19	-1	1885.5	PPPLPEPLTT
LSSEAWPPAASCPSS	1.13	THP	-0.03	-0.1	-0.21	-1	1489.8	LSSEAWPPAA
SHSQMRPELPPLPAS	1.39	THP	-0.2	-0.81	0.08	0.5	1647.09	SHSQMRPELP
LGGYGTGGYGGGGGYGGRGGYSGG	1.18	THP	0.04	-0.58	-0.34	1	2041.47	LGGYGTGGYG
FRSPAAPSPLALRQ	1.37	THP	-0.18	-0.22	-0.06	2	1510.94	FRSPAAPSPL
VMSRPVSSSSISTPLPP	1.21	THP	-0.07	0.13	-0.21	1	1742.25	VMSRPVSSSS
SGRGPCGWTSGPCPQ	0.97	THP	-0.15	-0.84	-0.13	1	1489.85	SGRGPCGWTS
LAFPPPPSQAAPDMSKP	0.9	THP	-0.08	-0.48	-0.02	0	1751.25	LAFPPPPSQA
SSRPASPVPASTPAW	1.48	THP	-0.11	-0.41	-0.17	1	1510.85	SSRPASPVPA
KLVYCICHLLGMMSCC	1.25	THP	0.12	1.52	-0.93	1.5	1817.59	KLVYCICHLL
WKGQLSPAMLCTHS	0.94	THP	-0.06	-0.14	-0.49	1.5	1559.04	WKGQLSPAML
SRTLSDVSHL	0.95	THP	-0.22	-0.25	0.09	0.5	1114.36	SRTLSDVSHL
PMSSTSASACSPSFFDR	1.14	THP	-0.14	-0.18	-0.05	0	1778.14	PMSSTSASAC
LLRQPDISCL	1.16	THP	-0.11	0.45	-0.17	0	1157.54	LLRQPDISCL
ECYLAACQKRDNWFC	1.61	THP	-0.23	-0.46	-0.11	0	1850.31	ECYLAACQKR
ACQLTLPALQP	1.12	THP	0.04	0.6	-0.67	0	1154.55	ACQLTLPALQ
DWSSGASPSRY	1.01	THP	-0.25	-1.24	0.09	0	1212.37	DWSSGASPSR
PPPPLPPSAGPPPPP	1.11	THP	-0.01	-0.88	-0.13	0	1414.86	PPPPLPPSAG
PLFQHWEPQVPTALP	1.26	THP	0	-0.35	-0.6	-0.5	1760.25	PLFQHWEPQV
ARPSPGHLLP	1.74	THP	-0.12	-0.43	-0.13	1.5	1044.36	ARPSPGHLLP
PPTSTSSPPSTASF	1.13	THP	-0.09	-0.56	-0.19	0	1363.61	PPTSTSSPPS
LCPPSLQLPMCAMGDM	1	THP	0.06	0.68	-0.52	-1	1707.36	LCPPSLQLPM
DHSCMQLYWETSPWGPCSED	0.93	THP	-0.15	-0.99	-0.1	-3.5	2371.83	DHSCMQLYWE
LPPSSPSLASFND	1.01	THP	-0.05	-0.22	-0.17	-1	1331.61	LPPSSPSLAS
RLVGLQLSLSCCW	1.94	THP	0.02	1.04	-0.79	1	1478	RLVGLQLSLS
RGLGNGHRAMGSL	0.91	THP	-0.2	-0.52	0.05	2.5	1325.71	RGLGNGHRAM
CCKNQCPKEL	2.45	THP	-0.36	-0.86	0.46	1	1165.54	CCKNQCPKEL
SGSSGGRGGRRSSQ	0.94	THP	-0.46	-1.64	0.76	3	1335.55	SGSSGGRGGR
PEGGFCSNRR	1.11	THP	-0.41	-1.39	0.6	1	1122.35	PEGGFCSNRR
SSSAAAAAASSSASCS	1.11	THP	-0.02	0.54	-0.13	0	1315.5	SSSAAAAAAS
SSHLAPLGKTLAHQSSW	1.05	THP	-0.07	-0.33	-0.4	2	1820.29	SSHLAPLGKT
ECWRTLEIPHFQP	1.02	THP	-0.16	-0.72	-0.17	-0.5	1656.08	ECWRTLEIPH
RLYAGGLGCS	1.27	THP	-0.02	0.41	-0.41	1	996.29	RLYAGGLGCS
GGFGGGGGGCSSGGGGGGYL	1.14	THP	0.15	0.03	-0.35	0	1517.87	GGFGGGGGGC
GRMANGLPGPRGPALS	0.9	THP	-0.14	-0.41	0.04	2	1551.03	GRMANGLPGP
LLTPGNGPPNPR	1.26	THP	-0.18	-0.98	-0.05	1	1232.58	LLTPGNGPPN
LQLTPSPGLSPSLLP	1.48	THP	0.06	0.37	-0.55	0	1520.03	LQLTPSPGLS
MPHSSLHPSIPQPRGL	1.59	THP	-0.13	-0.6	-0.22	2	1754.28	MPHSSLHPSI
CRGGGTCQMDAFMRRKC	1.41	THP	-0.35	-0.61	0.36	3	1920.52	CRGGGTCQMD
FPPPGGDRGRGGPGGMRGGRGGLM	1.43	THP	-0.19	-0.91	0.34	3	2296.98	FPPPGGDRGR
RRTSPPPASLAGPSVSSWSFSPS	1.47	THP	-0.15	-0.48	-0.1	2	2358.89	RRTSPPPASL
STHPAPSMSSLTSNQS	1.48	THP	-0.17	-0.76	-0.17	0.5	1631.95	STHPAPSMSS
PPMGGPPMGQMPGMMSSVMPGM	1.22	THP	0.07	0.04	-0.45	0	2206.08	PPMGGPPMGQ
KPPPQAHLPPAPAP	0.97	THP	-0.1	-0.9	-0.04	1.5	1417.86	KPPPQAHLPP
ELGGGGGGGGGGGGGMGGPPPAPGGGG	0.95	THP	0.12	-0.37	-0.02	-1	1935.46	ELGGGGGGGG
PMGRGGYGGGGSGGGGRGGFP	1.44	THP	-0.05	-0.7	0.01	2	1795.25	PMGRGGYGGG
SPSEAFGNHHSPS	1.09	THP	-0.17	-1.2	0.03	0	1353.54	SPSEAFGNHH
PCPVPPAGPLPGPRYR	1.1	THP	-0.14	-0.62	-0.07	2	1674.21	PCPVPPAGPL
PLYGHGECKWPGCE	1.41	THP	-0.1	-0.85	-0.07	-0.5	1575.98	PLYGHGECKW
FFQHPQPQFPYLHP	2.36	THP	-0.05	-0.89	-0.86	1	1783.23	FFQHPQPQFP
GLWFTRDPGFMP	1.01	THP	-0.01	-0.19	-0.49	0	1423.82	GLWFTRDPGF
ECRIYRNEFQC	1.26	THP	-0.42	-1.09	0.35	0	1460.79	ECRIYRNEFQ
HTDGPLANSWR	0.96	THP	-0.25	-1.23	-0.01	0.5	1253.49	HTDGPLANSW
LNPIPQAPLPPGW	1.58	THP	0.07	-0.18	-0.68	0	1399.85	LNPIPQAPLP
PSSCTTSCAH	2.14	THP	-0.13	-0.18	-0.29	0.5	993.19	PSSCTTSCAH
AASGLRYWSRRQPPAVASL	0.93	THP	-0.2	-0.33	-0.14	3	2086.64	AASGLRYWSR
SSSRSPTRHFRRSDSHS	1.17	THP	-0.59	-1.94	0.78	4	1987.29	SSSRSPTRHF
RLRPALRPYLGFLD	1.67	THP	-0.21	-0.15	-0.04	2	1687.22	RLRPALRPYL
AGGGPDSRRHWGGRGPRSA	1.06	THP	-0.37	-1.54	0.56	3.5	1934.33	AGGGPDSRRH
GPPARSASAPLVRSLR	1.04	THP	-0.23	-0.24	0.21	3	1635.11	GPPARSASAP
FRCKQCSSTLHSG	1.13	THP	-0.27	-0.54	-0.01	2.5	1453.83	FRCKQCSSTL
CQCAPGFLGETCQF	1.35	THP	0.01	0.36	-0.52	-1	1503.92	CQCAPGFLGE
SHQLRGLFPSTPYS	1.2	THP	-0.15	-0.63	-0.37	1.5	1589.97	SHQLRGLFPS
PPPPPPPSSVLASGHHT	1.45	THP	-0.05	-0.66	-0.25	1	1675.11	PPPPPPPSSV
RRFTSRSAL	0.98	THP	-0.51	-0.82	0.49	3	1093.36	RRFTSRSAL
SRVVLSGPGGPPVTSSSVSGSW	1.01	THP	-0.01	0.11	-0.3	1	2100.63	SRVVLSGPGG
SSGFYSRLRGTHRPGH	1.12	THP	-0.34	-1.28	0.12	4	1815.21	SSGFYSRLRG
LQRGDRVILLLPRL	1.01	THP	-0.19	0.37	-0.01	2	1662.28	LQRGDRVILL
RWHVSAWTQCSVSCGE	1.82	THP	-0.13	-0.3	-0.38	0.5	1836.25	RWHVSAWTQC
PGLYPPPVSMSPGQPPPQQLLAPTYFSA	0.93	THP	0.01	-0.27	-0.54	0	2938.8	PGLYPPPVSM
RPASSVSLLCRPTCSRPACCIP	1.7	THP	-0.17	0.28	-0.1	3	2318.07	RPASSVSLLC
PSSLPRTPALSPPPLSPPVLPPHP	1.97	THP	-0.05	-0.33	-0.25	1.5	2452.23	PSSLPRTPAL
WGLSAVSSHPP	1.93	THP	0.05	-0.03	-0.62	0.5	1137.41	WGLSAVSSHP
CCSARTSPATTICS	1.41	THP	-0.13	0.36	-0.22	1	1400.77	CCSARTSPAT
HGGHQPYPRSGHFPWTVPS	1	THP	-0.14	-1.19	-0.41	2.5	2144.62	HGGHQPYPRS
QCGRGYTGPRC	1.7	THP	-0.35	-1.12	0.14	2	1197.5	QCGRGYTGPR
MANGGGGGGGGGGGSSLRMS	1.01	THP	-0.01	-0.27	-0.04	1	1624.05	MANGGGGGGG
YGSGGRGSSYGGG	0.98	THP	-0.11	-0.95	-0.05	1	1161.34	YGSGGRGSSY
MRALSGPRLMLCG	1.4	THP	-0.09	0.56	-0.25	2	1404.96	MRALSGPRLM
GWGDVRLGGPLRP	1.15	THP	-0.14	-0.49	0.04	1	1379.78	GWGDVRLGGP
TRSPFPSQRL	1.31	THP	-0.39	-1.14	0.21	2	1188.48	TRSPFPSQRL
RPQPGLGRPRERLRV	1.05	THP	-0.56	-1.55	0.87	4	1787.32	RPQPGLGRPR
CSSSGGLNVTCS	1.11	THP	-0.03	0.4	-0.36	0	1114.37	CSSSGGLNVT
SHRSGGGGGGCGGS	1.38	THP	-0.12	-0.77	0.17	1.5	1132.34	SHRSGGGGGG
PACGRGFRRGTD	0.9	THP	-0.41	-1.12	0.63	2	1292.59	PACGRGFRRG
TWTYSLLNNHASPQL	0.97	THP	-0.07	-0.49	-0.78	0.5	1745.15	TWTYSLLNNH
HSPPHAQFTYQQPQP	1.37	THP	-0.23	-1.67	-0.37	1	1763.12	HSPPHAQFTY
SSVSTSNGVSST	1.26	THP	-0.11	-0.14	-0.15	0	1112.27	SSVSTSNGVS
WASATPHPSLAWMV	2.02	THP	0.11	0.34	-0.94	0.5	1553.99	WASATPHPSL
GSSTAWNTAFSPMA	0.99	THP	0.02	-0.01	-0.6	0	1427.73	GSSTAWNTAF
CGPEMYCLNFSCVE	1.2	THP	0	0.4	-0.42	-2	1595.04	CGPEMYCLNF
SLGCGSRSPASVGCGSRVFRPLGYGL	1.12	THP	-0.08	0.19	-0.2	3	2584.34	SLGCGSRSPA
QDSQHTPHSMTPSNATVPRSSTPS	1.12	THP	-0.28	-1.29	0.1	1	2551.03	QDSQHTPHSM
LDGDRAWGSRASRSSWRNGGSLSFD	0.99	THP	-0.31	-1.05	0.36	1	2741.23	LDGDRAWGSR
YWFLNRRL	1.52	THP	-0.26	-0.54	-0.7	2	1167.49	YWFLNRRL
PMGCPHALHQ	1.07	THP	-0.04	-0.35	-0.54	1	1090.43	PMGCPHALHQ
LLLPVSSLLL	0.97	THP	0.31	2.38	-1.17	0	1067.54	LLLPVSSLLL
FANMATVPSCPAPSSSP	1.12	THP	0	0.18	-0.4	0	1664.09	FANMATVPSC
TGHKCVFSEC	0.99	THP	-0.12	-0.05	-0.06	0.5	1110.4	TGHKCVFSEC
TWSLWSSTPSALLFP	1.95	THP	0.11	0.43	-0.99	0	1693.14	TWSLWSSTPS
SFLSSAPSSPSFPSP	1.35	THP	-0.01	-0.05	-0.35	0	1494.8	SFLSSAPSSP
SRSLSVSSVSSVSSAT	1.66	THP	-0.12	0.36	-0.09	1	1540.85	SRSLSVSSVS
WAEEGSPRTGLLCSAW	0.92	THP	-0.07	-0.27	-0.2	-1	1763.18	WAEEGSPRTG
TSWALSAWEGPSTSRALGLWESPVSPPS	1	THP	-0.04	-0.26	-0.3	-1	2957.64	TSWALSAWEG
FTHSPYSWSDSSDPLFLSVT	1.01	THP	-0.03	-0.22	-0.46	-1.5	2273.71	FTHSPYSWSD
FNSMSPLSSQSMFSAP	0.95	THP	-0.03	0	-0.48	0	1718.14	FNSMSPLSSQ
GPPGPPGGPGMPPGGRGRGRGQG	0.94	THP	-0.19	-1.33	0.34	3	2053.64	GPPGPPGGPG
RSHCDPPRKP	1.03	THP	-0.62	-2.27	1.08	2.5	1192.48	RSHCDPPRKP
LGSGLPPPGMPPPGSFPPPVPPP	1.15	THP	0.08	-0.26	-0.36	0	2189.93	LGSGLPPPGM
YPSSSSSSSSSSSSSSSASS	1.04	THP	-0.21	-0.74	0.12	0	1829.94	YPSSSSSSSS
GRAGGGGGSSGAGGGSGCG	1.15	THP	0	-0.29	0.1	1	1365.64	GRAGGGGGSS
YCELCGKMENLLRC	1.26	THP	-0.18	0.01	0.01	0	1675.23	YCELCGKMEN
VCKGSDLKSVCCL	1.33	THP	-0.08	0.78	0	1	1354.84	VCKGSDLKSV
TWRKHNRHPSG	1.05	THP	-0.55	-2.47	0.43	4	1375.67	TWRKHNRHPS
SCLATPASSSR	1.41	THP	-0.18	-0.01	0	1	1079.32	SCLATPASSS
VSCTAPLCSPWLTTS	1.56	THP	0.06	0.67	-0.75	0	1566.02	VSCTAPLCSP
MHSCVRTSGSHACEL	1.35	THP	-0.15	-0.08	-0.11	1	1618.04	MHSCVRTSGS
RAGGLGGRGNPARRL	1.49	THP	-0.36	-0.93	0.51	4	1507.94	RAGGLGGRGN
LPGRSPSSPPPVTSLLTHG	1.12	THP	-0.08	-0.29	-0.21	1.5	1900.44	LPGRSPSSPP
LSSGGSPLRSVR	1.27	THP	-0.23	-0.23	0.17	2	1215.54	LSSGGSPLRS
ARPTNRTALSDPSSRLSTSP	0.95	THP	-0.36	-1.01	0.39	2	2114.56	ARPTNRTALS
FWYLHGRRGRR	1.29	THP	-0.51	-1.6	0.14	4.5	1503.89	FWYLHGRRGR
TSDWSISSLSTFTSR	0.92	THP	-0.16	-0.31	-0.19	0	1674.98	TSDWSISSLS
LLQPPARGRRTRR	1.43	THP	-0.64	-1.61	0.82	5	1577.05	LLQPPARGRR
PSPPGLSGDAGRPAPPSRGSSYRL	0.91	THP	-0.23	-0.93	0.27	2	2379.94	PSPPGLSGDA
WHSPDSALFQ	1.43	THP	-0.06	-0.59	-0.49	-0.5	1187.41	WHSPDSALFQ
EHANCSQAGTAVTCICW	1.02	THP	-0.02	0.26	-0.52	-0.5	1794.24	EHANCSQAGT
CDGRCYGPYVSDCC	2	THP	-0.18	-0.22	-0.06	-1	1540.89	CDGRCYGPYV
AQPVSTPSTSSHFPPSPLL	1.5	THP	-0.03	-0.19	-0.41	0.5	1950.44	AQPVSTPSTS
SSSNQRATHSARLDSMDSSS	0.96	THP	-0.38	-1.2	0.49	0.5	2124.44	SSSNQRATHS
CRQAGMREECVL	1.09	THP	-0.3	-0.27	0.43	0	1394.81	CRQAGMREEC
PGGSRHARPQLLPRS	1.41	THP	-0.36	-1.2	0.35	3.5	1629.07	PGGSRHARPQ
GNGMSWDPPPWVTAHSAS	1.09	THP	-0.03	-0.61	-0.41	-0.5	1897.3	GNGMSWDPPP
DRCAPVMSAFGFPWP	1.05	THP	0.01	0.19	-0.46	0	1681.15	DRCAPVMSAF
GPPASPPSPRA	0.99	THP	-0.18	-0.99	0.24	1	1033.28	GPPASPPSPR
ASTPPRPRTQPSASSLA	1.11	THP	-0.27	-0.84	0.19	2	1724.12	ASTPPRPRTQ
SWARDLWMFIF	1.25	THP	0.09	0.64	-0.99	0	1471.89	SWARDLWMFI
SSGWDAHMACQ	1.27	THP	-0.09	-0.46	-0.31	-0.5	1192.43	SSGWDAHMAC
YRTLGGGGGGGSGGRRFS	1.31	THP	-0.19	-0.78	0.14	3	1699.09	YRTLGGGGGG
SRKDSGSSSVSSSSSSSSS	1.02	THP	-0.34	-1.02	0.62	1	1792.97	SRKDSGSSSV
PGTSMANSSALPSSSA	0.98	THP	-0.05	-0.09	-0.19	0	1464.77	PGTSMANSSA
AFRGGGGSGPRL	1.23	THP	-0.14	-0.42	0.12	2	1131.43	AFRGGGGSGP
EFVPPVPPPPYYP	0.98	THP	0.05	-0.47	-0.55	-1	1498.91	EFVPPVPPPP
GRSPLAQRPLRRQAAL	1.27	THP	-0.39	-0.79	0.36	4	1790.33	GRSPLAQRPL
SCSSGRCLPLVLLCDG	1.72	THP	-0.01	0.88	-0.3	0	1623.16	SCSSGRCLPL
SSHGAFSPSSAACVP	1.26	THP	0.02	0.27	-0.37	0.5	1404.7	SSHGAFSPSS
PFPQPDPQRPLMPGHS	1.59	THP	-0.21	-1.28	0.04	0.5	1801.28	PFPQPDPQRP
LRGARGGGPRR	1.73	THP	-0.52	-1.42	0.88	4	1152.48	LRGARGGGPR
DCCPFAHGPGEL	0.95	THP	-0.01	-0.07	-0.11	-1.5	1245.55	DCCPFAHGPG
DRSLPLSSFTQR	0.94	THP	-0.36	-0.86	0.3	1	1406.72	DRSLPLSSFT
RRSPPASGLQALRGG	1.03	THP	-0.31	-0.79	0.35	3	1522.94	RRSPPASGLQ
ASMKRSPSASSLSSMSSVASSV	1.46	THP	-0.13	0.12	0.02	2	2144.68	ASMKRSPSAS
PLNLGGGWASSAPLRTWSFGP	1.19	THP	0.02	-0.07	-0.57	1	2171.75	PLNLGGGWAS
FPSPSGPASPCSL	1.4	THP	0.02	0.07	-0.35	0	1246.56	FPSPSGPASP
NFCPMQPASPGQPLSPL	1.35	THP	-0.03	-0.23	-0.45	0	1784.32	NFCPMQPASP
MPGMAGGMPGMPGMP	1.2	THP	0.14	0.19	-0.47	0	1419.01	MPGMAGGMPG
PEEPGDSPPLRHRPR	0.94	THP	-0.5	-2.17	1.07	0.5	1740.11	PEEPGDSPPL
ASPLPSPPVAASLPPPPVAASLP	1.13	THP	0.1	0.49	-0.42	0	2133.82	ASPLPSPPVA
FSRHHPSLPASHSGS	2.17	THP	-0.19	-0.89	-0.12	2.5	1603.92	FSRHHPSLPA
SRGEAGRLLPPWRP	1.62	THP	-0.31	-1.06	0.34	2	1592.03	SRGEAGRLLP
PSSMQTSARP	1.27	THP	-0.3	-1.06	0.19	1	1061.3	PSSMQTSARP
RQPPTSCRY	1.16	THP	-0.53	-1.78	0.31	2	1107.36	RQPPTSCRY
MMSAISCWMENPTHSL	1.17	THP	0	0.16	-0.58	-0.5	1838.39	MMSAISCWME
CRVNGIPCHP	1.22	THP	-0.14	-0.11	-0.26	1.5	1095.44	CRVNGIPCHP
LYHCEAEQVAVCQYCCY	1.41	THP	-0.04	0.28	-0.64	-1.5	2025.55	LYHCEAEQVA
GHPASLPPAHSQTHPKTSMRT	1.02	THP	-0.23	-1.12	0.01	3.5	2238.81	GHPASLPPAH
NHVSSVSAHF	1.41	THP	-0.03	0.07	-0.59	1	1084.29	NHVSSVSAHF
WFRCSCYYFSKGMLTWIESQSAC	0.97	THP	-0.06	0.04	-0.64	1	2797.55	WFRCSCYYFS
WGYTSRLWEQLRQFW	1.81	THP	-0.2	-1	-0.62	1	2056.54	WGYTSRLWEQ
TPSFTSCSSSHSPP	1.63	THP	-0.13	-0.64	-0.21	0.5	1421.67	TPSFTSCSSS
FAIMPSSPPLASASSMSLPAA	1.06	THP	0.11	0.79	-0.53	0	2033.66	FAIMPSSPPL
DPQMPMSHPYSMPTPYPSL	1.61	THP	-0.1	-0.84	-0.37	-0.5	2176.77	DPQMPMSHPY
HQQVARLCHLCR	1.06	THP	-0.31	-0.32	-0.18	3	1463.92	HQQVARLCHL
APQSSAPVVWMPMPTPIPHC	0.95	THP	0.05	0.17	-0.65	0.5	2146.85	APQSSAPVVW
HPDMPMGPGMNPGPPMGP	1.05	THP	-0.03	-0.86	-0.14	-0.5	1817.41	HPDMPMGPGM
LHSASVLSNPHHCP	1.89	THP	-0.06	-0.19	-0.5	1.5	1498.88	LHSASVLSNP
GCWGKKKKKK	1.11	THP	-0.59	-2.26	1.36	6	1190.66	GCWGKKKKKK
SASPPPAASKPLGLVVPPSPP	0.91	THP	0.02	0.05	-0.19	1	1966.59	SASPPPAASK
MASGAGGRGGGGGGGKL	1.07	THP	-0.01	-0.23	0.13	2	1346.75	MASGAGGRGG
PPTKSGHLSS	1.06	THP	-0.19	-1	0.12	1.5	1010.25	PPTKSGHLSS
LTHSSHTSAT	2.05	THP	-0.13	-0.53	-0.36	1	1041.22	LTHSSHTSAT
EMPRAGSLGGRSPQEPWLWLP	1.2	THP	-0.14	-0.73	-0.06	0	2365.02	EMPRAGSLGG
RHSNSSDHCSV	1.74	THP	-0.4	-1.31	0.35	1	1228.4	RHSNSSDHCS
HEDSHGSHFVFSCR	0.91	THP	-0.22	-0.83	0.06	0.5	1644.93	HEDSHGSHFV
SSPNVSPTSVSPPTPP	1.37	THP	-0.1	-0.63	-0.13	0	1550.89	SSPNVSPTSV
LSTVTTSSSGTNPSSSASSTAM	1.13	THP	-0.09	-0.12	-0.21	0	2061.45	LSTVTTSSSG
SLGSRTSRSTSVSS	1.17	THP	-0.32	-0.6	0.29	2	1411.67	SLGSRTSRST
MRSHGALSRVTLLW	1.12	THP	-0.1	0.25	-0.46	2.5	1627.15	MRSHGALSRV
SHVPPSPPVPPGPVPPP	1.1	THP	0.01	-0.51	-0.26	0.5	1655.16	SHVPPSPPVP
LPPTAALPPRVSM	0.95	THP	-0.01	0.38	-0.35	1	1349.83	LPPTAALPPR
RQDLQTLCCTEGCSMS	1.14	THP	-0.23	-0.31	0.08	-1	1775.24	RQDLQTLCCT
AVPTSLPQGLSLPSFP	0.94	THP	0.08	0.43	-0.57	0	1611.1	AVPTSLPQGL
EHCSFGAGSLSRR	0.98	THP	-0.27	-0.62	0.28	1.5	1406.71	EHCSFGAGSL
GGGSRWPVGWPSTWSGERG	1.16	THP	-0.14	-1.04	-0.12	1	2016.44	GGGSRWPVGW
PFNFPAMIPLWM	1.32	THP	0.23	0.86	-1.24	0	1463.99	PFNFPAMIPL
LCDSDWTGYYCN	1.15	THP	-0.11	-0.59	-0.47	-2	1439.69	LCDSDWTGYY
ASARVEPWCDCRASGN	0.99	THP	-0.26	-0.59	0.28	0	1722.08	ASARVEPWCD
ALRHSGKCEC	1.48	THP	-0.31	-0.57	0.45	1.5	1103.41	ALRHSGKCEC
QHQSTHCGL	1.19	THP	-0.21	-1	-0.39	1	1010.23	QHQSTHCGL
PYHGMHGGGPGGPGGG	0.92	THP	0.04	-0.89	-0.29	1	1391.74	PYHGMHGGGP
ASHAGNSTNSNHCH	1.8	THP	-0.24	-1.25	-0.17	1.5	1436.63	ASHAGNSTNS
FLCSLCVPRVRKLWSSR	1.4	THP	-0.21	0.31	-0.2	4	2050.75	FLCSLCVPRV
RPPRLWSFKSGQPARIP	1.01	THP	-0.31	-1.02	0.16	4	1993.58	RPPRLWSFKS
SSSSSTSHLASPPSLG	1.25	THP	-0.08	-0.28	-0.16	0.5	1501.78	SSSSSTSHLA
AQRHLSGWAMRNT	1.02	THP	-0.3	-0.98	-0.13	2.5	1527.91	AQRHLSGWAM
MLSPEAAQLSDLSSWWC	1.03	THP	0	0.14	-0.48	-2	1924.41	MLSPEAAQLS
LRKQLPPPPPPIP	1.76	THP	-0.17	-0.85	0.06	2	1449.99	LRKQLPPPPP
ARRRGGGGGGGGRGRG	1.91	THP	-0.43	-1.54	0.91	5	1440.79	ARRRGGGGGG
APHRNGGGGGGGGSGLHC	1.16	THP	-0.07	-0.68	-0.04	2	1547.91	APHRNGGGGG
VQELPPSLRAPP	0.93	THP	-0.15	-0.42	0.07	0	1303.69	VQELPPSLRA
EKDPGMGGMGGMGGGMGGGMF	1.05	THP	0.06	-0.22	0	-1	1918.56	EKDPGMGGMG
ARPPPWAPPCCPSSAKCSRE	1.43	THP	-0.26	-0.82	0.25	2	2140.72	ARPPPWAPPC
SWLAPVVWEGTFSR	0.98	THP	0.02	0.19	-0.6	0	1635.05	SWLAPVVWEG
NCQHSDTLARWL	1.3	THP	-0.24	-0.72	-0.23	0.5	1443.77	NCQHSDTLAR
LVRPSRLSSSGTPM	1.12	THP	-0.2	-0.2	0.03	2	1487.93	LVRPSRLSSS
RRMTFCLSLAWFSTG	1.24	THP	-0.07	0.41	-0.6	2	1776.31	RRMTFCLSLA
GGGRGGGGSGRGGGGGGGGWGGGGGGG	1.37	THP	0.01	-0.74	0.11	2	1916.33	GGGRGGGGSG
GPCSASCGGGLRER	1.57	THP	-0.23	-0.48	0.38	1	1349.69	GPCSASCGGG
STSPHCRASAWARACSAGAWCGRAP	1.56	THP	-0.16	-0.25	-0.16	3.5	2561.18	STSPHCRASA
GRMSHASMGNRPYGPNMANM	0.91	THP	-0.22	-0.94	-0.09	2.5	2179.78	GRMSHASMGN
LLLPASPVRMHSSRL	1.29	THP	-0.11	0.35	-0.27	2.5	1677.26	LLLPASPVRM
ECVYHLGCFCCCVCERQLRKGD	2.37	THP	-0.2	0.07	0.01	0.5	2565.34	ECVYHLGCFC
CKDLGHADCQGW	0.97	THP	-0.17	-0.73	0.08	-0.5	1332.64	CKDLGHADCQ
VTHPSGSTSTPASRS	1.19	THP	-0.21	-0.76	0.05	1.5	1471.74	VTHPSGSTST
SISSAQTHVCSHHNQ	1.29	THP	-0.19	-0.73	-0.33	1.5	1635.95	SISSAQTHVC
TCSQVCHPQPCQ	1.5	THP	-0.2	-0.56	-0.37	0.5	1330.68	TCSQVCHPQP
LPGLNSPSLPGF	1.08	THP	0.1	0.29	-0.59	0	1198.56	LPGLNSPSLP
SYSSTLRGMPAS	0.91	THP	-0.15	-0.35	-0.17	1	1256.55	SYSSTLRGMP
STCDPSSASTRLCACAARTT	1.23	THP	-0.22	-0.08	0.09	1	2002.46	STCDPSSAST
PGTRGSSSPSSQPPGPHPH	1.07	THP	-0.25	-1.57	0.17	2	1867.23	PGTRGSSSPS
CCQPTCCGSS	2.49	THP	-0.11	0.22	-0.36	0	988.25	CCQPTCCGSS
VSSRSSGSSAISGPRAVR	0.99	THP	-0.25	-0.28	0.29	3	1761.16	VSSRSSGSSA
SASSSARLIL	0.99	THP	-0.05	0.8	-0.22	1	1004.28	SASSSARLIL
LCWAVFGDPLWL	1.66	THP	0.26	1.28	-1.23	-1	1419.88	LCWAVFGDPL
RASAARTGGGRGGGGGSGGGGGGGC	1.34	THP	-0.11	-0.56	0.27	3	1934.37	RASAARTGGG
PWLIQQGTCPTCR	1.38	THP	-0.14	-0.32	-0.49	1	1502.96	PWLIQQGTCP
GGGGGGGGGSYAGGGGGGGGGNFGG	1.18	THP	0.13	-0.36	-0.19	0	1742.08	GGGGGGGGGS
LRCNFSSSA	1.13	THP	-0.19	0.06	-0.19	1	984.2	LRCNFSSSA
MPRAPALLFSCL	1.26	THP	0.07	1.14	-0.66	1	1318.82	MPRAPALLFS
PCVAPCGQTCQD	0.99	THP	-0.11	-0.11	-0.17	-1	1221.54	PCVAPCGQTC
AFCGAGFGRRSYL	1.2	THP	-0.08	0.25	-0.37	2	1404.78	AFCGAGFGRR
LPNDSLPSPS	1.22	THP	-0.13	-0.66	0.05	-1	1026.24	LPNDSLPSPS
HGWQHASGTPLSPH	1.56	THP	-0.09	-1.05	-0.49	1.5	1511.83	HGWQHASGTP
CCECSASLSHQYY	1.64	THP	-0.12	-0.16	-0.48	-0.5	1493.81	CCECSASLSH
SVLSPTPLSSPL	1.47	THP	0.06	0.58	-0.51	0	1197.56	SVLSPTPLSS
CPFPAQGDCCPACDGC	1.97	THP	-0.04	0.17	-0.14	-2	1587	CPFPAQGDCC
HSMPPSALSQL	1.61	THP	-0.04	-0.09	-0.44	0.5	1167.5	HSMPPSALSQ
SRFRSSTSGSWAPECR	1.03	THP	-0.38	-1.09	0.36	2	1814.16	SRFRSSTSGS
YRALPLGDFDRFQ	1.13	THP	-0.23	-0.6	0.06	0	1597.97	YRALPLGDFD
SLGRPDFHWSSN	1.29	THP	-0.23	-1.12	-0.09	0.5	1402.65	SLGRPDFHWS
TCCLMVALC	1.91	THP	0.23	2.48	-1.14	0	956.38	TCCLMVALC
PPRPSRSLCPAVAF	1.38	THP	-0.15	-0.01	-0.09	2	1497.95	PPRPSRSLCP
LVSLPQAPLPSAPPSFLP	1.64	THP	0.1	0.57	-0.62	0	1831.44	LVSLPQAPLP
YCTHHSPCKNGATCSNSGQ	1.31	THP	-0.23	-1	-0.16	2	1995.41	YCTHHSPCKN
LLLYMSWSGSP	1.26	THP	0.14	0.61	-1.05	0	1253.64	LLLYMSWSGS
SFPGFHHAPQHLRC	1.72	THP	-0.13	-0.59	-0.45	2.5	1634.05	SFPGFHHAPQ
SPTRPNFHQNCRLYP	1.63	THP	-0.36	-1.41	-0.11	2.5	1830.26	SPTRPNFHQN
SPRSLPPSSPIRPMARSSTA	1.43	THP	-0.27	-0.66	0.22	3	2095.66	SPRSLPPSSP
RQLPSRSRMDSCS	1.03	THP	-0.54	-1.32	0.72	2	1522.88	RQLPSRSRMD
VLRAQSRAPTQLPPLLP	1.39	THP	-0.14	-0.05	-0.2	2	1857.48	VLRAQSRAPT
GYGGKMGGRN	1.36	THP	-0.24	-1.33	0.26	2	996.26	GYGGKMGGRN
KESLSVSSSSSASSSSGSSTTSPSSSAS	0.92	THP	-0.18	-0.49	0.22	0	2553.89	KESLSVSSSS
GGGGGGGGGGAPVCGASGLCKTNCGVCCKAELGL	1.08	THP	0.06	0.42	-0.17	1	2868.81	GGGGGGGGGG
LPPRSTLQHPDYL	1.52	THP	-0.2	-0.84	-0.16	0.5	1536.94	LPPRSTLQHP
ALTLPRPRIVSLLSSHAHHS	1.12	THP	-0.11	0.09	-0.31	3.5	2192.85	ALTLPRPRIV
KQPPPQPALPYNHIYQ	1.06	THP	-0.19	-1.35	-0.34	1.5	1891.4	KQPPPQPALP
RIRLGGPEPWRGPPSPRAPPEL	1.22	THP	-0.28	-1.15	0.41	2	2436.13	RIRLGGPEPW
LASTVSSTMTMSSGVAMSSSVA	1.43	THP	0.06	0.85	-0.48	0	2092.68	LASTVSSTMT
QSPSMMHTQSPGNLHAASSPSGALRAPSPAS	1.05	THP	-0.13	-0.55	-0.13	2	3060.8	QSPSMMHTQS
SWGRLGVRLGEGSGGPGLSLCPPG	0.99	THP	-0.03	-0.08	-0.13	1	2310	SWGRLGVRLG
RNVQRPLLQAPFLPPKPPPPLIVV	0.99	THP	-0.08	0.03	-0.29	3	2687.68	RNVQRPLLQA
LQEPPQDCSGGPVRRCALCNCG	1.43	THP	-0.22	-0.44	0.15	0	2303.94	LQEPPQDCSG
GSFGRGGSLGLGGGGGMGP	0.97	THP	0.07	0.01	-0.2	1	1578.04	GSFGRGGSLG
PNCSPQLCSLRGV	1.46	THP	-0.15	0.01	-0.24	1	1373.79	PNCSPQLCSL
AAPCSHPQSLTSLP	1.57	THP	-0.05	-0.06	-0.39	0.5	1408.78	AAPCSHPQSL
LSAGRCHSAAWTAPPVPPR	1	THP	-0.12	-0.24	-0.21	2.5	1974.52	LSAGRCHSAA
GYLSDVASPPLLPSPFQP	0.91	THP	0.04	0.06	-0.45	-1	1885.4	GYLSDVASPP
SSSAPASDVSAMASPMNG	0.97	THP	-0.05	-0.01	-0.06	-1	1667.02	SSSAPASDVS
ASSTSSGSNSNVLVPVSW	1.32	THP	-0.02	0.11	-0.45	0	1779.14	ASSTSSGSNS
STADPSSLVHHTNSCLPHHPPRVASVM	1.03	THP	-0.12	-0.29	-0.24	2	2878.62	STADPSSLVH
GAPRGGGRGGSRSDRGGG	1.5	THP	-0.37	-1.47	0.84	3	1613.93	GAPRGGGRGG
PMLMMPPPPAAMGPPGAP	1.12	THP	0.12	0.18	-0.47	0	1760.47	PMLMMPPPPA
RCRSTHLGPALQTQC	1.54	THP	-0.3	-0.6	-0.05	2.5	1671.14	RCRSTHLGPA
PMQPPRPPAPAPVPAARPPPPAP	1.01	THP	-0.13	-0.79	0.04	2	2307.05	PMQPPRPPAP
LCWARALPPRPGA	1.73	THP	-0.1	0.03	-0.27	2	1407.87	LCWARALPPR
SDGWVGLGCCELA	1.21	THP	0.09	0.67	-0.36	-2	1309.66	SDGWVGLGCC
LSAGLPPLKASHSAHSTHSAHSTHSTH	1.7	THP	-0.12	-0.59	-0.24	4	2757.37	LSAGLPPLKA
SCRPDCPTGMEY	0.97	THP	-0.26	-0.92	0.27	-1	1358.67	SCRPDCPTGM
CSSTQFLCADSEMCIPIWW	1.09	THP	0.05	0.52	-0.67	-2	2220.84	CSSTQFLCAD
EHSAPKWNWNCAGKYKWSS	1.08	THP	-0.24	-1.46	-0.09	2.5	2279.78	EHSAPKWNWN
LMMSSCLWASATPHPSLAWMV	1.92	THP	0.13	0.81	-0.94	0.5	2320.1	LMMSSCLWAS
LAWSHASPSAVPQV	1.08	THP	0.05	0.31	-0.65	0.5	1449.82	LAWSHASPSA
YSYCSRSPCQNGGTCINARTSFICACRHPF	1.04	THP	-0.18	-0.26	-0.32	3.5	3344.2	YSYCSRSPCQ
GPSPASPALPEGPRPSRP	0.92	THP	-0.23	-1.08	0.39	1	1770.21	GPSPASPALP
LRSAPSLQSRRSSFS	1.04	THP	-0.38	-0.75	0.29	3	1679.06	LRSAPSLQSR
SPLLQAFLHVGWNPAR	0.93	THP	-0.01	0.12	-0.66	1.5	1806.34	SPLLQAFLHV
AGGRRPRSSGSPSSP	1.05	THP	-0.4	-1.45	0.67	3	1455.74	AGGRRPRSSG
FCEFLTLCNLVLDCATCGSCS	1.33	THP	0.08	1.21	-0.63	-2	2242.93	FCEFLTLCNL
YSFRNLPSSASPPQPSP	1.4	THP	-0.2	-0.96	-0.13	1	1832.22	YSFRNLPSSA
PRPSQSSLHNRGTPLVLGAPRQSSP	0.97	THP	-0.27	-0.93	0.11	3.5	2640.32	PRPSQSSLHN
GWPEGGRLGAQWGSCCSHL	1.6	THP	-0.06	-0.38	-0.35	0.5	2001.51	GWPEGGRLGA
VDECAGNPCRNGALCE	1.04	THP	-0.19	-0.33	0.32	-2	1651.03	VDECAGNPCR
LLGALPLPLLLLLPLLLLPPS	0.95	THP	0.32	2	-1.12	0	2190.24	LLGALPLPLL
FPPSAHQQPPHYTTSALQQ	1.31	THP	-0.16	-1.1	-0.42	1	2135.6	FPPSAHQQPP
DMWSDSPSCTPSSPSVFSL	1.19	THP	-0.07	-0.2	-0.2	-2	2030.45	DMWSDSPSCT
CFSPSGHILASCST	1.12	THP	0.05	0.63	-0.59	0.5	1409.78	CFSPSGHILA
LNMSSSPGSSGMHTSWN	1.28	THP	-0.1	-0.67	-0.38	0.5	1780.16	LNMSSSPGSS
RLLCESGRSSMVWVSASPCPHCG	1.69	THP	-0.11	0.11	-0.21	1.5	2463.18	RLLCESGRSS
RSGSRLSLCPSAASL	1.49	THP	-0.17	0.17	0.01	2	1504.92	RSGSRLSLCP
HPHLSFMA	1.72	THP	0.06	0.19	-0.85	1	939.21	HPHLSFMA
MEQQPPRPPQPSQPPPPPPMSFRA	1.62	THP	-0.28	-1.55	0.2	1	2695.44	MEQQPPRPPQ
GPRSPLDMASSRSS	1.15	THP	-0.32	-0.9	0.49	1	1447.76	GPRSPLDMAS
LPAELRGLRRYLDC	1.09	THP	-0.29	-0.31	0.29	1	1675.18	LPAELRGLRR
PPYPAAHDLPQPLLQQPHAQE	0.97	THP	-0.14	-1.02	-0.16	-1	2347.93	PPYPAAHDLP
VSTGTDHSGSSNSSSPPSSSVVLRF	0.91	THP	-0.14	-0.36	-0.04	0.5	2479.94	VSTGTDHSGS
TAWTLSTSSVSSQGSL	1.07	THP	-0.03	0.12	-0.51	0	1611.95	TAWTLSTSSV
SRPSTPFTEASMMM	1.12	THP	-0.14	-0.34	-0.06	0	1573.01	SRPSTPFTEA
HTGEKPYKCGACEKC	1.12	THP	-0.3	-1.13	0.55	1.5	1654.11	HTGEKPYKCG
GKANCCLGPGWGTPPLPAF	0.9	THP	0.06	0.11	-0.51	1	1886.49	GKANCCLGPG
CMLKPGFTCAEGECCESCQM	1.66	THP	-0.09	0.14	-0.02	-2	2170.84	CMLKPGFTCA
LQPQPHQPLQPQPPVHP	1.31	THP	-0.18	-1.37	-0.3	1	1938.49	LQPQPHQPLQ
YLPIMEFSHPRR	0.91	THP	-0.23	-0.67	-0.07	1.5	1545.99	YLPIMEFSHP
PLPAPLYSFPGASCPV	1.11	THP	0.13	0.59	-0.71	0	1616.12	PLPAPLYSFP
LKQPHPLAPPSQAQFSH	1.17	THP	-0.15	-0.87	-0.23	2	1883.39	LKQPHPLAPP
PGPPQPPPGLLGQASLL	1.1	THP	0.05	-0.09	-0.41	0	1639.19	PGPPQPPPGL
PPALPPPAPSPPAWQARA	1.17	THP	-0.06	-0.54	-0.23	1	1821.34	PPALPPPAPS
YRRCLQILAAGLFL	0.9	THP	0	1.03	-0.69	2	1637.23	YRRCLQILAA
SFCPMQCPPNSH	2.11	THP	-0.13	-0.58	-0.44	0.5	1347.7	SFCPMQCPPN
RRTVLGLARCWRRF	1.16	THP	-0.42	-0.4	0.15	5	1790.36	RRTVLGLARC
PVHCGTLCLLSALCCLVLS	1.4	THP	0.19	1.87	-0.98	0.5	1945.73	PVHCGTLCLL
APAAVSSSSTSSSSED	0.92	THP	-0.15	-0.38	0.31	-2	1469.62	APAAVSSSST
PRNSSPHLNPLTSASPPL	1.88	THP	-0.18	-0.74	-0.12	1.5	1885.36	PRNSSPHLNP
GYGTGGYGGGGGYGGRGGYSGGGYGGG	1.26	THP	0.03	-0.74	-0.32	1	2262.69	GYGTGGYGGG
SGRGGRGRGRPARPSPSP	1.27	THP	-0.49	-1.75	0.86	5	1805.23	SGRGGRGRGR
LCDKQCLCSAQNVIDYGTCVC	1.16	THP	-0.07	0.49	-0.32	-1	2279.96	LCDKQCLCSA
PAVARPPSVDSLSSASTSHS	1.24	THP	-0.14	-0.24	0.04	0.5	1953.35	PAVARPPSVD
ASPAASHPLASSPLSGPPSP	1.37	THP	-0.01	-0.16	-0.22	0.5	1828.27	ASPAASHPLA
PRLAPQLPPASSQPRAPL	1.76	THP	-0.19	-0.58	0.01	2	1896.47	PRLAPQLPPA
RPPAPRSPGLPASSAH	1.37	THP	-0.23	-0.86	0.19	2.5	1598	RPPAPRSPGL
SSGTPASSSSSHKTPASC	1.23	THP	-0.19	-0.69	0.12	1.5	1678.97	SSGTPASSSS
CCSDHQHCCPKGYTCVARRH	1.88	THP	-0.33	-0.79	0.07	3.5	2304.91	CCSDHQHCCP
RHFTNLCLNGRCLP	1.43	THP	-0.22	-0.19	-0.31	2.5	1644.15	RHFTNLCLNG
TSGKMSTPLMRASASRATSTPLMRASASGMMSM	1.19	THP	-0.16	-0.08	-0.03	4	3393.46	TSGKMSTPLM
LYQMQPSGPRPLL	1.52	THP	-0.12	-0.42	-0.41	1	1499.99	LYQMQPSGPR
CKPIPANLQLCHG	0.95	THP	-0.05	0.09	-0.38	1.5	1393.88	CKPIPANLQL
WAPPLDSPGTPSPDGPWCCS	1.21	THP	-0.04	-0.59	-0.23	-2	2070.54	WAPPLDSPGT
ARSSMRSGSSMSTIG	1.08	THP	-0.23	-0.35	0.17	2	1514.89	ARSSMRSGSS
CELMCLAPPPVPN	1.11	THP	0.05	0.55	-0.44	-1	1383.88	CELMCLAPPP
DSPRSTFLLAFSPDRTLL	0.98	THP	-0.15	-0.02	-0.03	0	2036.56	DSPRSTFLLA
SPWALPFPPLWPHSTTTTSPSLPLFW	2.21	THP	0.08	-0.02	-0.92	0.5	2964.79	SPWALPFPPL
AGGQLEPGLCYCPLPAGHSC	0.96	THP	0.03	0.19	-0.43	-0.5	1973.56	AGGQLEPGLC
QRMNPPRGMGPMGPG	1.26	THP	-0.25	-1.22	0.17	2	1583.1	QRMNPPRGMG
VGLRRGGSGGRGGGGWGGGRGG	1.74	THP	-0.16	-0.79	0.25	4	1927.43	VGLRRGGSGG
REWGRCRARCQELERRL	1.18	THP	-0.66	-1.64	1.04	3	2217.79	REWGRCRARC
SLGNPNLLPLAHPSLQRNSMSPGVTHRP	0.95	THP	-0.16	-0.54	-0.2	3	2991.85	SLGNPNLLPL
GPAFLQPLSSALFF	1.05	THP	0.2	1.05	-0.94	0	1494.95	GPAFLQPLSS
SGDVSSPKHAMWM	0.97	THP	-0.09	-0.47	-0.12	0.5	1432.81	SGDVSSPKHA
EKPASSLPSSPPLPPQLLTRNLVL	0.91	THP	-0.1	-0.15	-0.11	1	2555.37	EKPASSLPSS
GVAGAGGAMCWRRRR	1.35	THP	-0.3	-0.43	0.22	4	1604.09	GVAGAGGAMC
LRPGPARGRGRGRPARAPHSGLSPP	1.26	THP	-0.37	-1.22	0.52	6.5	2574.3	LRPGPARGRG
CPDFFLFLCRLLSPVLKA	0.9	THP	0.08	1.25	-0.62	1	2082.85	CPDFFLFLCR
LCTSWPRPIFGSLHHVPDLSCR	1.34	THP	-0.1	-0.01	-0.37	2	2522.26	LCTSWPRPIF
TSSMTTRSMSSSMVTSAH	2.02	THP	-0.17	-0.24	-0.16	1.5	1889.34	TSSMTTRSMS
FRRGKSCLFRLQPATLHRLLLRTP	1.1	THP	-0.29	-0.26	0	6.5	2880.86	FRRGKSCLFR
ASLCKLSPCTVTRVCD	0.96	THP	-0.13	0.55	-0.08	1	1696.24	ASLCKLSPCT
HRCLSPPLPCWD	2.5	THP	-0.15	-0.43	-0.27	0.5	1423.83	HRCLSPPLPC
HLRCHTGERPYP	0.98	THP	-0.38	-1.52	0.21	2	1465.82	HLRCHTGERP
QPLPPAPLAMPHIKPP	1.32	THP	-0.01	-0.26	-0.31	1.5	1704.34	QPLPPAPLAM
YASPPPMSPLKAMSS	1.35	THP	-0.06	-0.24	-0.23	1	1564.04	YASPPPMSPL
PVPPPPRGPPARRRR	1.29	THP	-0.56	-1.87	0.87	5	1706.22	PVPPPPRGPP
PTLPAPLTPRGASPAASSPPP	1	THP	-0.06	-0.32	-0.12	1	1982.54	PTLPAPLTPR
RPPLSALAPPHSSPDP	1.76	THP	-0.16	-0.75	0.11	0.5	1639.05	RPPLSALAPP
LAHHSMAPYHFPPNPDMNPE	1.04	THP	-0.11	-0.99	-0.25	-0.5	2302.85	LAHHSMAPYH
LLPPPDPLVPLASL	1.41	THP	0.15	0.91	-0.55	-1	1441.98	LLPPPDPLVP
SSHVFHVKPPPHA	0.95	THP	-0.08	-0.53	-0.3	2.5	1439.82	SSHVFHVKPP
EMSASSMSSAGSAVASAVPSARPRHQKSMSAS	1	THP	-0.17	-0.28	0.14	2.5	3151.91	EMSASSMSSA
DMHPDMPMGPGMNPGPPMGPGGPPMMPYGP	0.96	THP	-0.01	-0.74	-0.19	-1.5	3049.06	DMHPDMPMGP
GMPPPGMRPPPPGMRGPPPPGMRPPRP	1.46	THP	-0.23	-1.29	0.25	4	2812.81	GMPPPGMRPP
PSGLQPPHCLQPCSPGLYGPACQFSCQCHGAPC	1.58	THP	-0.04	-0.12	-0.5	1	3385.38	PSGLQPPHCL
CREDRDCAAGEKCVSNGCGHVCSPAP	0.98	THP	-0.25	-0.51	0.45	-0.5	2665.3	CREDRDCAAG
HRCFHYPYQPLCPRC	2.47	THP	-0.26	-0.81	-0.45	3	1920.46	HRCFHYPYQP
SPPPPPPPPTLLSSGHPVPT	1.35	THP	-0.02	-0.58	-0.28	0.5	1972.55	SPPPPPPPPT
NNLCHTLGPAHPPDPQR	1.26	THP	-0.25	-1.21	0.01	1	1867.32	NNLCHTLGPA
SMPSLPRQACCQLFSWTSVA	1.36	THP	-0.05	0.28	-0.55	1	2212.86	SMPSLPRQAC
ALDFQPSSPSPHRKPST	0.95	THP	-0.28	-1.21	0.28	1.5	1852.26	ALDFQPSSPS
AYPMPFCDRCGKLPLSP	1.26	THP	-0.1	-0.1	-0.17	1	1895.51	AYPMPFCDRC
PSPCLHNGSCSETPGLGGPGFRC	1.12	THP	-0.09	-0.36	-0.13	0.5	2273.87	PSPCLHNGSC
SMSDSGAASPGARSR	0.92	THP	-0.29	-0.77	0.51	1	1436.7	SMSDSGAASP
LGVCAGESSSWGSMRP	1.08	THP	-0.06	-0.04	-0.14	0	1624.04	LGVCAGESSS
TSSPQSPPASPTSGPSNSSV	0.96	THP	-0.16	-0.86	0	0	1872.19	TSSPQSPPAS
RKCCNHPYLFDG	1.22	THP	-0.27	-0.86	0.01	1.5	1452.83	RKCCNHPYLF
GALPAAHCLSRCP	1.32	THP	-0.04	0.45	-0.33	1.5	1295.71	GALPAAHCLS
SSLPLPTPSPTEPPP	1.21	THP	-0.08	-0.73	-0.03	-1	1516.91	SSLPLPTPSP
LSRLCAQGCLAPLGLLVS	0.95	THP	0.09	1.31	-0.64	1	1814.51	LSRLCAQGCL
WCQCVAWSSSGTTK	1.66	THP	-0.08	-0.17	-0.54	1	1543.92	WCQCVAWSSS
AWHPLLSASITLPLFF	1.04	THP	0.23	1.21	-1.17	0.5	1813.41	AWHPLLSASI
AQSAQQPPPPPPPPPQLSPA	1.11	THP	-0.13	-1.12	-0.1	0	2002.53	AQSAQQPPPP
WTASSTAQPFPENPHP	1.12	THP	-0.13	-1.1	-0.26	-0.5	1767.1	WTASSTAQPF
QCQEVPACSRLGLWGSWGPW	1.67	THP	-0.04	-0.26	-0.54	0	2260.87	QCQEVPACSR
AGFRGWRCEERCEQGTYGNDCHQRCQCQ	1.54	THP	-0.41	-1.43	0.37	0.5	3322.02	AGFRGWRCEE
WVNTPGQTAPYGLGNPPRRRRRSLPRRC	1.17	THP	-0.45	-1.41	0.31	7	3263.15	WVNTPGQTAP
FPHLPGTPRPAPSTPP	1.21	THP	-0.11	-0.82	-0.18	1.5	1669.13	FPHLPGTPRP
LYPPAYGPLPGLSLP	1.39	THP	0.14	0.32	-0.8	0	1555.07	LYPPAYGPLP
PVSSHNSLVYSNPVSSL	0.94	THP	-0.04	0.04	-0.51	0.5	1787.2	PVSSHNSLVY
TLPPAMCPLPSRKLL	1.21	THP	-0.06	0.34	-0.27	2	1637.29	TLPPAMCPLP
PRVPLPLPPTYRRVHS	1.03	THP	-0.27	-0.72	-0.03	3.5	1885.47	PRVPLPLPPT
PCQGQDCQDRWFSTPWSP	0.93	THP	-0.25	-1.31	-0.08	-1	2138.56	PCQGQDCQDR
GGGTRGRARSGSLGTGDRSRRS	1.16	THP	-0.49	-1.47	0.87	5	2204.66	GGGTRGRARS

## Sheet: ANTIMICROBIAL
PEPTIDE	SVM SCORE	PREDICTION	HYDROPHOBICITY	HYDROPATHICITY	HYDROPHILLICITY	CHARGE	MOL. WT.	N TERMINAL 10 AA
VGSVHCIFGEPRALLTH	1.16	ABP	0.02	0.55	-0.44	1	1836.4	VGSVHCIFGE
REITLKGFREGSFKVL	1.05	ABP	-0.22	-0.26	0.38	2	1880.46	REITLKGFRE
DKVKGHILLTAGVL	1.53	ABP	0.03	0.72	-0.19	1.5	1464.01	DKVKGHILLT
HDRVRLLGALEHK	1.32	ABP	-0.32	-0.72	0.51	2	1543.99	HDRVRLLGAL
LISKGKKTGAKGKR	1.18	ABP	-0.41	-1.19	0.99	6	1472.02	LISKGKKTGA
FGHIAKAEGDTRFLV	0.96	ABP	-0.06	0.11	0	0.5	1661.11	FGHIAKAEGD
GKHSSHEVKALGAMWKL	1.56	ABP	-0.13	-0.45	0.05	3	1879.47	GKHSSHEVKA
QKSDLIVHQIVHTGEKPYK	1.02	ABP	-0.21	-0.83	0.19	2	2220.86	QKSDLIVHQI
LVKVVERELISKHMKTIVEM	1.25	ABP	-0.13	0.29	0.23	1.5	2383.27	LVKVVERELI
ARVPHAVVCIVGTHAD	1.04	ABP	0.02	0.76	-0.36	1	1645.14	ARVPHAVVCI
VQALKAMGYFLKHLA	0.95	ABP	0.04	0.63	-0.59	2.5	1690.31	VQALKAMGYF
ERMKVINTGIKVWCRN	1.21	ABP	-0.28	-0.47	0.17	3	1947.59	ERMKVINTGI
VIESATICHLRPVRLP	0.95	ABP	-0.08	0.56	-0.21	1.5	1804.42	VIESATICHL
GMGHLWRKVHTV	1.32	ABP	-0.11	-0.26	-0.41	3	1420.89	GMGHLWRKVH
MTCLIHVLEAWFGVEH	1.09	ABP	0.15	0.88	-0.78	-1	1885.48	MTCLIHVLEA
RRRQAVELNVVAIVNDTVGTMM	1	ABP	-0.17	0.18	0	1	2473.24	RRRQAVELNV
CKGFFRRTIRLKLVYDK	0.94	ABP	-0.34	-0.39	0.32	5	2143.87	CKGFFRRTIR
LAHIKYAAKHGVRL	1.91	ABP	-0.11	0.09	-0.19	4	1577.12	LAHIKYAAKH
RRKQRLHARYV	1.65	ABP	-0.72	-1.83	0.78	5.5	1482.91	RRKQRLHARY
MRVRRRLKRMHVSAT	1.17	ABP	-0.56	-0.89	0.63	6.5	1897.55	MRVRRRLKRM
WAGAVITGFRNKTKASLAH	1.14	ABP	-0.08	-0.02	-0.25	3.5	2028.62	WAGAVITGFR
LGAWLLTANGSEMHKHV	1.22	ABP	0	0.04	-0.44	1	1864.42	LGAWLLTANG
VRNGGRVQLVARLVSRE	0.99	ABP	-0.32	-0.23	0.33	3	1909.48	VRNGGRVQLV
HSYNAAHVLK	0.92	ABP	-0.12	-0.43	-0.41	2	1139.42	HSYNAAHVLK
RLPAVVFTTQRGHEL	0.97	ABP	-0.17	-0.13	-0.11	1.5	1724.22	RLPAVVFTTQ
HNVSRVPVYSHITHKAL	1.45	ABP	-0.14	-0.24	-0.35	3.5	1958.51	HNVSRVPVYS
VVEKGTPGLSFGKKEKK	0.96	ABP	-0.27	-0.93	0.8	3	1832.43	VVEKGTPGLS
RNTEKAKTKEVPKVKRGRGRP	1.39	ABP	-0.63	-2.06	1.38	7	2436.16	RNTEKAKTKE
LFRGVFVHRYRDVLPEIRA	1.13	ABP	-0.2	0.03	-0.01	2.5	2344.04	LFRGVFVHRY
YKCKECGKTFRGRTVLIR	1.52	ABP	-0.37	-0.66	0.46	5	2158.87	YKCKECGKTF
HLVYSAHRPVAVAAGEFLYKKLFS	0.91	ABP	-0.01	0.35	-0.41	3	2704.52	HLVYSAHRPV
AKELVEIAVPENLVGAILGKGGKT	1.02	ABP	0	0.37	0.12	0	2407.23	AKELVEIAVP
VGKNGKRHDHAILLT	1.87	ABP	-0.23	-0.61	0.23	3	1659.16	VGKNGKRHDH
NFLHLTPVAIKKHCEAL	1.02	ABP	-0.03	0.32	-0.32	2	1934.59	NFLHLTPVAI
VRAHAVITLGKL	1.94	ABP	0.01	0.95	-0.36	2.5	1277.76	VRAHAVITLG
PVVISSVMHRVAHQAAPHVHILLANFYLL	1.3	ABP	0.1	0.92	-0.84	3	3234.33	PVVISSVMHR
RRHAMRGRLYYTAKAKKK	1.17	ABP	-0.57	-1.63	0.77	8.5	2234.95	RRHAMRGRLY
RLHGSAASHVLHPESGLGYK	0.92	ABP	-0.12	-0.44	-0.09	2.5	2116.67	RLHGSAASHV
MAHVDGELATVRERGLRDEVRTKKGGL	0.94	ABP	-0.32	-0.74	0.72	1.5	2994.83	MAHVDGELAT
NAIRRVGTVLLIMHTLKY	1.52	ABP	-0.07	0.54	-0.46	3.5	2098.87	NAIRRVGTVL
QVLTVGNAFRPKIKYT	0.94	ABP	-0.15	-0.17	-0.21	3	1835.42	QVLTVGNAFR
GQKRKVKDRLKAYV	1.47	ABP	-0.52	-1.38	0.97	5	1689.24	GQKRKVKDRL
RYCMHQHLKVATGK	1.38	ABP	-0.27	-0.74	-0.04	4	1672.21	RYCMHQHLKV
RELAREKVMREVK	1.03	ABP	-0.56	-1.22	1.34	2	1644.15	RELAREKVMR
LAVATVICKNKLQGIEVGHFMGGDVGL	0.99	ABP	0.07	0.75	-0.34	0.5	2770.74	LAVATVICKN
VATTRIETMLGDVAVAVHPKDPRYQHLKGKS	1.13	ABP	-0.19	-0.42	0.19	3	3419.43	VATTRIETML
VRVTVFPSKTVAQHSGVPWWIILVAILAGILMLGL	1.01	ABP	0.19	1.37	-0.91	2.5	3787.24	VRVTVFPSKT
QLATKGKVAVCRE	1.09	ABP	-0.24	-0.16	0.38	2	1402.86	QLATKGKVAV
SDEVTRQLRATAAHKVGRDGIVATRL	0.93	ABP	-0.28	-0.42	0.42	2.5	2821.57	SDEVTRQLRA
VKVKVVQSLGFAIYRALDWGLAEHE	1.4	ABP	-0.03	0.3	-0.2	0.5	2829.68	VKVKVVQSLG
KLGLAGSKITAQGISHL	1.23	ABP	0	0.35	-0.24	2.5	1694.28	KLGLAGSKIT
LAEQLHMEKEVIRVWFCNR	1.1	ABP	-0.2	-0.26	0.04	0.5	2402.12	LAEQLHMEKE
LRKVTGLGGEHKED	1.1	ABP	-0.32	-1.15	0.86	0.5	1538.94	LRKVTGLGGE
WVDFYLLAHHVRQG	1.07	ABP	-0.03	0.01	-0.72	1	1741.2	WVDFYLLAHH
KYKFLLYGLVGRK	1.05	ABP	-0.15	-0.09	-0.15	4	1585.17	KYKFLLYGLV
LYERMFKWLVARINR	0.97	ABP	-0.25	-0.25	-0.11	3	1995.64	LYERMFKWLV
HSRVGGRLIVQADELAQMWK	1.02	ABP	-0.18	-0.33	0.06	1.5	2294.97	HSRVGGRLIV
VFVRRSPLVLVAVARTR	0.94	ABP	-0.16	0.82	-0.16	4	1939.62	VFVRRSPLVL
RAGAVLRPCQHRVLCE	1.07	ABP	-0.26	-0.07	0.13	2.5	1808.38	RAGAVLRPCQ
KLQKLGITHVLNAAEG	1.64	ABP	-0.07	0.04	-0.07	1.5	1692.25	KLQKLGITHV
GSHHIGLHIDPVVKALVGLFSLV	1.4	ABP	0.15	1.05	-0.64	1.5	2409.25	GSHHIGLHID
REGEIRHLFRSFAFLHCKKLV	0.98	ABP	-0.22	-0.15	0.12	4	2587.4	REGEIRHLFR
DVWEVLNVMGIYAGRKHF	1.23	ABP	-0.03	0.13	-0.36	0.5	2134.76	DVWEVLNVMG
TPLEKNFLYKCVGTTLGAASSKVVRKHLR	1.05	ABP	-0.19	-0.19	0.06	5.5	3218.26	TPLEKNFLYK
KVYQLETGLTRHPEEKPVRKDKRDEL	0.94	ABP	-0.47	-1.67	1.05	1.5	3165.99	KVYQLETGLT
SAVAFRKAFCHHKLVELDATGVN	1.13	ABP	-0.09	0.19	-0.09	2	2514.23	SAVAFRKAFC
EGLVKDLLEREGLTAEGKIEIKIVRPGT	0.95	ABP	-0.17	-0.26	0.57	-1	3065.02	EGLVKDLLER
EGIPVEMVVVGDDSAFTVLKKAGRRGLCGTVLIH	0.98	ABP	-0.03	0.49	-0.02	0.5	3568.74	EGIPVEMVVV
GFKHPVIGVHVRRT	1.59	ABP	-0.17	-0.18	-0.09	4	1603.12	GFKHPVIGVH
RYGKRLKAKNLMYIKQL	0.98	ABP	-0.37	-0.88	0.28	6	2123.9	RYGKRLKAKN
GVTHRISLVLRAEQ	1.5	ABP	-0.17	0.09	-0.02	1.5	1579.05	GVTHRISLVL
RHTHTVKVMVQAWPFAC	1.23	ABP	-0.08	0.07	-0.55	3	2011.64	RHTHTVKVMV
LIAVAGKALGPTDLMEHH	0.94	ABP	0.04	0.39	-0.22	0	1873.48	LIAVAGKALG
TVARILHGGMVHR	1.47	ABP	-0.1	0.27	-0.29	3	1446.94	TVARILHGGM
LDVTPVGSKLEIRNAAHE	1.01	ABP	-0.16	-0.28	0.29	-0.5	1949.46	LDVTPVGSKL
KVREHHRKLRKEAKKRGRK	1.87	ABP	-0.84	-2.63	1.8	10	2441.21	KVREHHRKLR
LAISIAQMEKRLLHGLIHNVLPYVGTSV	1.17	ABP	0.04	0.69	-0.53	2	3074.15	LAISIAQMEK
ACPNLVGVETSHLELVESIWTYMPHVHILGKF	0.9	ABP	0.06	0.42	-0.54	-0.5	3621.74	ACPNLVGVET
LKSLTEHGAAAKDGRLKVGD	1.01	ABP	-0.23	-0.58	0.6	1.5	2066.64	LKSLTEHGAA
HLAGLDKMSKGHMLADVVAIIGTQDIVFGEV	0.96	ABP	0.05	0.61	-0.2	-1	3266.33	HLAGLDKMSK
LHRDMKAANVLITRDGVL	0.9	ABP	-0.16	0.12	0.1	1.5	2022.67	LHRDMKAANV
RVRIKGAESEKYL	1.34	ABP	-0.38	-0.92	0.8	2	1548.99	RVRIKGAESE
ERIAHAKQIIKPFILRRVKEEV	1.66	ABP	-0.27	-0.34	0.51	3.5	2674.57	ERIAHAKQII
KNRIIVEADRKGTVGAS	0.98	ABP	-0.28	-0.51	0.62	2	1814.32	KNRIIVEADR
KLTTMKKVSDGHFHTVIARRAGMAASL	0.99	ABP	-0.15	-0.03	0.03	5	2927.88	KLTTMKKVSD
GRELWNLRMHKKKVTHVALNPCC	1.33	ABP	-0.26	-0.55	0.06	5	2734.65	GRELWNLRMH
VEGLANGRLIQHHGA	1.07	ABP	-0.08	-0.18	-0.17	1	1572	VEGLANGRLI
TSDGHWAHVVCAIWIPEVC	0.96	ABP	0.1	0.61	-0.68	-1	2123.71	TSDGHWAHVV
RAKVLEVEKMGGEREELQKLVRHA	1.27	ABP	-0.35	-0.86	0.85	1.5	2806.65	RAKVLEVEKM
SNLIVHQRTHTGKK	1.31	ABP	-0.34	-1.13	0.2	4	1619.08	SNLIVHQRTH
QHFVKVTQGYIANQILHV	1.06	ABP	-0.01	0.18	-0.71	2	2095.73	QHFVKVTQGY
QNIVPHTVIKGIHE	1.02	ABP	-0.05	-0.11	-0.24	1	1585.07	QNIVPHTVIK
QMAVHKLAKSIPLRRQ	0.98	ABP	-0.3	-0.47	0.19	4.5	1876.54	QMAVHKLAKS
LKPVFHRKSHSTGEA	0.99	ABP	-0.27	-0.93	0.33	3	1694.14	LKPVFHRKSH
RVHLGHAIMSF	1.48	ABP	0.02	0.63	-0.65	2	1267.68	RVHLGHAIMS
KMKLLEFLAKIHGT	1.43	ABP	-0.06	0.21	-0.03	2.5	1629.26	KMKLLEFLAK
HIGLHDLRKKLSVALQEPV	1.44	ABP	-0.15	-0.11	0.11	2	2153.86	HIGLHDLRKK
LQSIPEALKAGKKV	0.97	ABP	-0.14	-0.11	0.33	2	1482.01	LQSIPEALKA
HRVRELYQKLKEFM	0.93	ABP	-0.4	-1.09	0.46	2.5	1877.45	HRVRELYQKL
KDLTGLKGRLIEVTEEELKKHN	1.28	ABP	-0.32	-1.03	0.84	0.5	2551.29	KDLTGLKGRL
RLTIGRSAAQKKFHV	1.7	ABP	-0.28	-0.43	0.2	4.5	1712.25	RLTIGRSAAQ
RVLNLGPITRK	1.14	ABP	-0.27	-0.25	0.17	3	1266.72	RVLNLGPITR
GIKSQRLNRAVTCMLRK	1.1	ABP	-0.37	-0.45	0.33	5	1974.67	GIKSQRLNRA
GKILHRQKRGWMW	1.34	ABP	-0.33	-1.22	0	4.5	1696.26	GKILHRQKRG
VYLHAIVRDAHG	1.32	ABP	-0.02	0.35	-0.41	1	1350.72	VYLHAIVRDA
SVKEIHITNPRKAV	1.46	ABP	-0.24	-0.46	0.32	2.5	1592.08	SVKEIHITNP
RRMRCKEVQVL	1.67	ABP	-0.53	-0.71	0.74	3	1417.91	RRMRCKEVQV
TQIHWCVLPFRVL	0.99	ABP	0.06	0.88	-1	1.5	1612.17	TQIHWCVLPF
AGSTHLTALHFAAKEGHV	1.06	ABP	0	0.1	-0.31	1.5	1847.33	AGSTHLTALH
CREPGIAGLVKIVK	1.36	ABP	-0.07	0.52	0.15	2	1483.06	CREPGIAGLV
VGNVTILAVVRTERSLHKPMF	1.4	ABP	-0.08	0.39	-0.21	2.5	2368.16	VGNVTILAVV
PKNVHQRPAVALLCGPHVKGAQGISCGRH	0.93	ABP	-0.16	-0.31	-0.07	5.5	3032	PKNVHQRPAV
MKGKRLTLKIMVRKPGAPV	1.02	ABP	-0.23	-0.17	0.32	6	2124.03	MKGKRLTLKI
CEVLGEEIGLPKRVIQVWFQNAR	1.09	ABP	-0.12	-0.04	-0.02	0	2685.5	CEVLGEEIGL
YENAGTVEFLVDRHGKH	1.11	ABP	-0.21	-0.87	0.22	0	1972.4	YENAGTVEFL
VFHGKGLLLSGAKAT	1.56	ABP	0.05	0.55	-0.33	2.5	1499.02	VFHGKGLLLS
DVAFSLLGKKKKR	1	ABP	-0.35	-0.65	0.78	4	1490.01	DVAFSLLGKK
SLIQVLVRNVGFAK	0.92	ABP	0	0.91	-0.44	2	1544.09	SLIQVLVRNV
LSHRFHGKGSGKMKTERRMK	1	ABP	-0.48	-1.6	0.81	7	2372.11	LSHRFHGKGS
KSNLRVHHRTHTGE	1.1	ABP	-0.46	-1.72	0.49	3.5	1672.05	KSNLRVHHRT
VKLLEEKSHQYGIK	1.4	ABP	-0.24	-0.83	0.41	1.5	1672.18	VKLLEEKSHQ
PYHYVTVKRHGKL	1.25	ABP	-0.25	-0.91	-0.14	4	1598.08	PYHYVTVKRH
RHAQGEKTTGINVRKGGISNILEEQVVQPLL	1.17	ABP	-0.18	-0.45	0.17	1.5	3386.38	RHAQGEKTTG
DGQVAEAGVKPVRLKER	0.92	ABP	-0.32	-0.78	0.82	1	1852.37	DGQVAEAGVK
RIVKESGGKLTRRLVNSQ	1.24	ABP	-0.39	-0.8	0.57	4	2041.66	RIVKESGGKL
SVWGKELEKEKRPKEIKVRVTKVKGG	1.67	ABP	-0.38	-1.17	1	5	3009.99	SVWGKELEKE
VHEVTACLIAVVKTDHEVQVR	1.28	ABP	-0.08	0.45	-0.06	0	2347.05	VHEVTACLIA
TKNEEVKIIMVKHYRIGLDEKYEVT	1.16	ABP	-0.24	-0.68	0.45	0.5	3036.93	TKNEEVKIIM
ELVRHFLIETGPRGVKLKG	1.67	ABP	-0.16	-0.18	0.23	2.5	2149.87	ELVRHFLIET
KVYGKTSHLRAHL	1.88	ABP	-0.24	-0.64	0	4	1509.97	KVYGKTSHLR
TIARGLVGGLKNTLVHRNLPAILDWV	1.05	ABP	-0.01	0.48	-0.4	2.5	2827.79	TIARGLVGGL
LSLSHVAHLKICITHVTGGG	1.47	ABP	0.09	0.77	-0.61	2.5	2043.74	LSLSHVAHLK
FVIGLVGNILVVLVLYKRIKN	1.09	ABP	0.13	1.48	-0.74	3	2371.35	FVIGLVGNIL
EVIGAGEFGEVCRGRLKQPGRREVFVAIKT	0.94	ABP	-0.2	-0.21	0.38	2	3303.3	EVIGAGEFGE
RMVPHIGKCL	0.96	ABP	-0.11	0.33	-0.19	2.5	1153.62	RMVPHIGKCL
RIAVAVVKGLTYLWS	1.05	ABP	0.08	1.05	-0.71	2	1676.26	RIAVAVVKGL
WLRQAKNGRCQVLYKTEL	1.12	ABP	-0.31	-0.79	0.06	3	2206.87	WLRQAKNGRC
EEAVREVHKLIEGKAPIISGVTKAL	1.45	ABP	-0.1	0.07	0.34	0.5	2688.55	EEAVREVHKL
KASQKIGFRLRNLLKLPKAHKWCIY	1.16	ABP	-0.23	-0.42	0.01	7.5	3013.09	KASQKIGFRL
QKSEVVKLVRSHLRVMT	0.99	ABP	-0.27	-0.18	0.24	3.5	2010.69	QKSEVVKLVR
KKGVRATGTIRESRTEK	1.01	ABP	-0.52	-1.49	1.14	4	1917.44	KKGVRATGTI
RVDRRVARGEEQQRLLLYHTH	1.2	ABP	-0.48	-1.3	0.56	3	2633.29	RVDRRVARGE
AVDIVSHGKN	0.93	ABP	-0.09	-0.06	0.07	0.5	1039.3	AVDIVSHGKN
HMVIVKAKLGQSFL	1.44	ABP	0.04	0.81	-0.48	2.5	1571.18	HMVIVKAKLG
SKTCGRGVRKREVTCRRAAMA	1.04	ABP	-0.46	-0.77	0.75	6	2337.06	SKTCGRGVRK
LRDKDLGKIHKAAIVGNVAKVQQILL	1.59	ABP	-0.12	0.2	0.1	3.5	2841.86	LRDKDLGKIH
TDLKAALEQRGLAKSGQKSALVKRLKGALMLE	0.98	ABP	-0.21	-0.24	0.4	4	3425.59	TDLKAALEQR
LIKRFLGKLTIPVQRLLERQAIGMKVLAYALK	1.33	ABP	-0.09	0.46	-0.14	6	3682.14	LIKRFLGKLT
EGKRVLIAAHGNSLRGIVKH	2.31	ABP	-0.17	-0.18	0.17	4	2155.85	EGKRVLIAAH
RRIKRHKAIVTEDGKV	2.24	ABP	-0.47	-1.08	1	4.5	1906.5	RRIKRHKAIV
VWIPKKAGMKKGWQR	1.01	ABP	-0.27	-1.03	0.22	5	1813.47	VWIPKKAGMK
LVKKKGTRAYACQ	0.95	ABP	-0.32	-0.62	0.32	4	1465.96	LVKKKGTRAY
QCEQVDRNLRRVTR	1.24	ABP	-0.64	-1.54	0.89	2	1773.2	QCEQVDRNLR
RVLEAPMTIRVADQIKPVGFTVH	1.36	ABP	-0.08	0.27	-0.1	1.5	2578.42	RVLEAPMTIR
LKEGVIIRPKKNVSVTFA	1.48	ABP	-0.12	0.18	0.12	3	1999.7	LKEGVIIRPK
EVEKHGRGQVLFDLVCEHL	0.96	ABP	-0.14	-0.2	0.2	-1	2208.82	EVEKHGRGQV
KSVLNNRHIVKMLEKYLKG	1.28	ABP	-0.26	-0.53	0.23	4.5	2271.07	KSVLNNRHIV
LVVFLATRRVAVTARH	1	ABP	-0.09	0.91	-0.37	3.5	1809.42	LVVFLATRRV
ELWRAQVVATTVMLERKMPRTL	0.91	ABP	-0.2	-0.05	0	2	2629.51	ELWRAQVVAT
LRLGVLKKKAILHQEGHMDDALSLTRCQ	0.96	ABP	-0.21	-0.26	0.21	3	3175.22	LRLGVLKKKA
VTYATEPKVLIR	1.13	ABP	-0.11	0.19	-0.1	1	1389.83	VTYATEPKVL
SKPTALQRAGVITHFV	1.01	ABP	-0.06	0.24	-0.31	2.5	1725.26	SKPTALQRAG
EAHVYIRRGRMKY	1.06	ABP	-0.42	-1.13	0.37	3.5	1679.16	EAHVYIRRGR
LSQQWAKAPGRGEVGKLRIAKN	1.04	ABP	-0.27	-0.8	0.32	4	2408.14	LSQQWAKAPG
LLGRKEQTVTVRFQKLHLAC	1.28	ABP	-0.21	-0.08	0	3.5	2341.13	LLGRKEQTVT
EVPREYIRALNATKLERV	1.19	ABP	-0.32	-0.61	0.51	1	2157.76	EVPREYIRAL
VRLKEKLKYETTIRPICL	1.03	ABP	-0.27	-0.27	0.36	3	2203.99	VRLKEKLKYE
LLKGARKLLTARTGVEVPRH	1.54	ABP	-0.25	-0.23	0.28	4.5	2215.98	LLKGARKLLT
GIPLLGILVQSRHLRTVVHVLDKIL	1.15	ABP	0.02	0.92	-0.44	3	2790.86	GIPLLGILVQ
VYHHDVRVAQHHVGTL	0.96	ABP	-0.11	-0.27	-0.42	2	1868.34	VYHHDVRVAQ
VIARNQVRLAEV	1.42	ABP	-0.17	0.42	0.03	1	1367.79	VIARNQVRLA
LPALINIKAVIEQRQCTGV	0.98	ABP	-0.04	0.55	-0.25	1	2066.79	LPALINIKAV
HKHGDSVRELLRG	1.05	ABP	-0.39	-1.24	0.71	2	1503.88	HKHGDSVREL
PALIVAVSATVGHK	0.96	ABP	0.13	1.12	-0.51	1.5	1362.84	PALIVAVSAT
PVLKVLTAAVRNHV	0.95	ABP	-0.03	0.76	-0.38	2.5	1517.06	PVLKVLTAAV
VWAARKGHLECV	1.57	ABP	-0.1	0.16	-0.14	1.5	1368.79	VWAARKGHLE
SLFLVENGMKGFIKGRKLDKIG	1.06	ABP	-0.12	-0.04	0.21	3	2451.32	SLFLVENGMK
TRDVPILKAQAGH	0.91	ABP	-0.19	-0.4	0.17	1.5	1405.81	TRDVPILKAQ
QDVHMRIQLLAVEVWTDR	1.03	ABP	-0.18	-0.16	-0.03	-0.5	2209.83	QDVHMRIQLL
VKKYCLDLVEGARQMR	1.07	ABP	-0.3	-0.42	0.41	2	1909.53	VKKYCLDLVE
KLLEEKSHQYGIKL	1.13	ABP	-0.24	-0.86	0.39	1.5	1686.21	KLLEEKSHQY
VVAPGVRMALKLHQDH	1.21	ABP	-0.1	0.12	-0.14	2	1771.36	VVAPGVRMAL
KIDGLLNEHKKKVLK	0.91	ABP	-0.32	-0.9	0.8	3.5	1763.4	KIDGLLNEHK
RQEDPHKATVDGVLLVVLKE	1.08	ABP	-0.19	-0.28	0.42	-0.5	2246.9	RQEDPHKATV
LGSEHAVKQAETLFH	0.94	ABP	-0.09	-0.3	-0.03	0	1667.08	LGSEHAVKQA
MEAAIVYANFRLKKHVLH	1.62	ABP	-0.08	0.2	-0.27	3	2140.85	MEAAIVYANF
ELTRHYRKHTGAK	1.34	ABP	-0.5	-1.86	0.66	4	1597	ELTRHYRKHT
RATRLVKSQQSAGKEYVGIVR	1.15	ABP	-0.31	-0.56	0.34	4	2347.03	RATRLVKSQQ
GPCVVKTLTRHHL	1.13	ABP	-0.13	0.02	-0.26	3	1460.96	GPCVVKTLTR
KGSGDVLGKIAHLAQ	1.21	ABP	-0.06	-0.01	0.07	1.5	1493.96	KGSGDVLGKI
SGTGLKDIKAVKHKLQTHL	1.54	ABP	-0.2	-0.53	0.24	4	2074.76	SGTGLKDIKA
LSRSVKTNRGVGKIAMTQKR	1.01	ABP	-0.38	-0.78	0.49	6	2230.96	LSRSVKTNRG
KGLVDIQPHWVSA	0.9	ABP	-0.01	0.05	-0.35	0.5	1449.87	KGLVDIQPHW
HTNRCDKTHVLVLE	1.1	ABP	-0.27	-0.59	0.2	1	1665.11	HTNRCDKTHV
RAVRGCRPVLKRAFSLHK	1.65	ABP	-0.36	-0.38	0.37	6.5	2094.81	RAVRGCRPVL
VRGRHLVLLDKKET	1.68	ABP	-0.34	-0.59	0.62	2.5	1664.2	VRGRHLVLLD
LEVGFRHIDCAHVYQNEEHVGQ	0.92	ABP	-0.16	-0.58	-0.01	-1.5	2581.16	LEVGFRHIDC
MNQHHEAIPVLVQRG	1.07	ABP	-0.15	-0.43	-0.19	1	1729.23	MNQHHEAIPV
RVTGEVHIGGVMLKLV	1	ABP	0.04	0.86	-0.29	1.5	1708.36	RVTGEVHIGG
EEVKRIVSGIIHH	1.13	ABP	-0.13	-0.08	0.22	1	1516.97	EEVKRIVSGI
KFPYLEEVVKGHHV	0.97	ABP	-0.1	-0.38	-0.01	1	1682.17	KFPYLEEVVK
VALWTPGHNRTWHKVA	1.62	ABP	-0.11	-0.48	-0.51	3	1873.39	VALWTPGHNR
NTALHEAVIERHVFVVELLLLHGASA	1.08	ABP	0.05	0.78	-0.41	-0.5	2839.7	NTALHEAVIE
VLGAKIKAMESKLLVGG	1.42	ABP	0.03	0.74	-0.01	2	1714.41	VLGAKIKAME
RENNKPRTVLKPRKVC	1.07	ABP	-0.57	-1.56	0.95	5	1938.55	RENNKPRTVL
DAKFRRVPRILVCG	1.19	ABP	-0.27	0.06	0.31	3	1630.18	DAKFRRVPRI
QHENLLRVKAKKFG	1.91	ABP	-0.34	-0.99	0.49	3.5	1668.19	QHENLLRVKA
ALEWLQVIFGVEVKEVDPTEHIYV	0.96	ABP	0.04	0.38	-0.25	-3.5	2814.61	ALEWLQVIFG
GAKILSVVIWA	0.97	ABP	0.25	1.71	-0.86	1	1156.6	GAKILSVVIW
FILHKRHAEMLTGGH	1.54	ABP	-0.11	-0.29	-0.17	2.5	1747.29	FILHKRHAEM
VKEIDIAATLEHVR	1.39	ABP	-0.13	0.14	0.34	-0.5	1594.05	VKEIDIAATL
KRGLMVAAVLFIT	1.12	ABP	0.1	1.48	-0.58	2	1419	KRGLMVAAVL
RSVHTGEKPYKCDVCGKAFSHTGNLAVHR	1.07	ABP	-0.25	-0.69	0.19	4.5	3199.05	RSVHTGEKPY
TEVKRRYLDWRALMK	1.05	ABP	-0.43	-1.05	0.53	3	1965.56	TEVKRRYLDW
WRFRKEQAQGKVNVFGRKLR	1.83	ABP	-0.46	-1.29	0.54	6	2504.24	WRFRKEQAQG
VYLGHAVHMVRVQEKRKLLREAERAK	1.98	ABP	-0.34	-0.63	0.49	5	3118.11	VYLGHAVHMV
GEAKHWEPFRKVVSGRIV	1.59	ABP	-0.21	-0.52	0.28	2.5	2095.7	GEAKHWEPFR
NVISVRLFKRKVGGLGFLVK	1.4	ABP	-0.08	0.6	-0.14	5	2231.09	NVISVRLFKR
RKLVTVRAGCPIRLFA	1.52	ABP	-0.15	0.58	-0.08	4	1800.47	RKLVTVRAGC
DRNLRRITRMVLVVVAVFIVCW	1.6	ABP	-0.06	1.1	-0.46	3	2659.63	DRNLRRITRM
REAIVHASHLPMSVIIVGVGNAD	1.18	ABP	0.05	0.7	-0.31	0	2386.12	REAIVHASHL
LRVIKYSAPVNPHLR	1.08	ABP	-0.19	-0.17	-0.15	3.5	1763.34	LRVIKYSAPV
LVVEIRHHHSEQRLF	1.12	ABP	-0.23	-0.44	0.01	1.5	1900.41	LVVEIRHHHS
RRRAKGAMGLEHIVPN	0.97	ABP	-0.33	-0.75	0.46	3.5	1805.37	RRRAKGAMGL
SRRTRIRGGCRVLVTV	1.11	ABP	-0.39	-0.13	0.34	5	1829.43	SRRTRIRGGC
VFLANHHCSKMWNVEKIHSEFGAPTIAKRLIS	0.98	ABP	-0.08	-0.03	-0.21	3.5	3665.78	VFLANHHCSK
DRKLKTDREKIEKQPVHERN	0.92	ABP	-0.66	-2.33	1.52	2.5	2520.14	DRKLKTDREK
VLEGKGAGKKGRFQGKATKMSRRAEV	1.17	ABP	-0.35	-0.95	0.77	6	2790.67	VLEGKGAGKK
QGIPYTLNGKKVEVAVK	0.95	ABP	-0.12	-0.23	0.06	2	1844.45	QGIPYTLNGK
HALGDLVQSVGVLIAAYIIRFKPE	1.12	ABP	0.06	0.8	-0.4	0.5	2610.47	HALGDLVQSV
TPRVRKQTRLYSAVKE	1.31	ABP	-0.47	-1.21	0.63	4	1932.48	TPRVRKQTRL
WEVSALSRAVQKGFTKDVLKHL	1.15	ABP	-0.15	-0.14	0.05	2.5	2513.27	WEVSALSRAV
QVGFIDSEKRMNVALTRGRRHL	1.03	ABP	-0.33	-0.65	0.37	3.5	2584.33	QVGFIDSEKR
GMHKNEAISQQLHVLRKE	1.25	ABP	-0.29	-0.97	0.34	2	2118.73	GMHKNEAISQ
SLAKIGFHLSHKVTS	0.97	ABP	-0.04	0.21	-0.29	3	1625.13	SLAKIGFHLS
RFDHILFTGSTGVGRVVMMAAAKH	1.04	ABP	-0.04	0.4	-0.28	3	2602.43	RFDHILFTGS
VWLAVLHRVTIAEQVKHQTKCSICRQCP	1.44	ABP	-0.15	0.09	-0.23	4	3248.32	VWLAVLHRVT
NHEMRVAMRRVCKQLVN	1.27	ABP	-0.38	-0.59	0.28	3.5	2084.76	NHEMRVAMRR
QRTASVLWPWINRNARVADLVR	1.1	ABP	-0.24	-0.31	-0.12	3	2622.35	QRTASVLWPW
GTTVHYVRRGLWEK	1.37	ABP	-0.26	-0.84	0.01	2.5	1702.16	GTTVHYVRRG
AHVTHHPISVREVTLRCWA	1.75	ABP	-0.12	0.01	-0.34	2.5	2212.84	AHVTHHPISV
VCGVRFTRNDKLKIHMRKH	1.82	ABP	-0.4	-0.83	0.44	6	2339.11	VCGVRFTRND
LMGNRVKEANVWNLLRRFGVDVGRK	1.06	ABP	-0.27	-0.43	0.22	4	2928.84	LMGNRVKEAN
GVALQHRPVVLIRELSGKRA	1.67	ABP	-0.18	0.07	0.12	3.5	2199.94	GVALQHRPVV
LQVKNIIYHAVKDAVGTL	1.46	ABP	0	0.49	-0.36	1.5	1982.64	LQVKNIIYHA
KVHIGRLTRNVTKDHIMEL	1.8	ABP	-0.25	-0.45	0.26	3	2260.99	KVHIGRLTRN
EQNGKVMGAELRHVLT	1.08	ABP	-0.19	-0.46	0.19	0.5	1782.3	EQNGKVMGAE
LWINRVGPQMHV	0.95	ABP	-0.04	0.08	-0.7	1.5	1449.93	LWINRVGPQM
RRTVLGLARCWRRF	1.11	ABP	-0.42	-0.4	0.15	5	1790.36	RRTVLGLARC
REKVTGDLVALKMVKM	0.93	ABP	-0.19	0.09	0.4	2	1818.51	REKVTGDLVA
FQTVTQMVRVWRNECLRV	1.1	ABP	-0.24	-0.11	-0.23	2	2265.95	FQTVTQMVRV
NKQGGLRLAQARALIKIDVNKTRKL	1.38	ABP	-0.32	-0.57	0.42	6	2805.76	NKQGGLRLAQ
RQPIYLEVRVLNRT	1.56	ABP	-0.33	-0.51	0.09	2	1757.28	RQPIYLEVRV
AGRKPLKSGMKELAVFR	1	ABP	-0.26	-0.43	0.49	4	1888.55	AGRKPLKSGM
TINSLVIAAIIVTRKLHHPANYL	1.12	ABP	0.03	0.71	-0.63	3	2558.43	TINSLVIAAI
LRIIWIKHRGEKLFELH	1.4	ABP	-0.17	-0.22	0.02	3	2188.93	LRIIWIKHRG
KAVLLIGEQGTAKTVIIKGFMS	1.06	ABP	0.04	0.71	-0.23	2	2305.17	KAVLLIGEQG
REIVEHLLDHGAEVNHEDVDGRTALSV	0.93	ABP	-0.19	-0.47	0.42	-3.5	3011.67	REIVEHLLDH
KCRACGKAFRWSSNRVRHEKIHTR	1.4	ABP	-0.49	-1.3	0.59	8	2927.74	KCRACGKAFR
LMTQRMVASVLGIREVAKGN	0.92	ABP	-0.11	0.32	-0.06	2	2173.93	LMTQRMVASV
KMALKKDRVSMGHWYIEVF	1.01	ABP	-0.15	-0.25	-0.01	2.5	2339.1	KMALKKDRVS
HNHQATNMIALLTGALVTGVDKGSKVNLWKQVVVD	0.96	ABP	-0.05	0.13	-0.29	2	3758.92	HNHQATNMIA
PQRKVTLAAPNRKDMEEWINVIKTV	1.15	ABP	-0.26	-0.65	0.33	2	2937.83	PQRKVTLAAP
TVNKFSLRVFGSHKAVEIEQ	0.91	ABP	-0.16	-0.2	0.07	1.5	2289.92	TVNKFSLRVF
LLLKKENLARVGDALLLAISKGYVRIV	1.03	ABP	-0.04	0.72	-0.11	3	2967.08	LLLKKENLAR
ALEAKAVGEKGVLGHALLIGTEAVKNLEV	1.04	ABP	0.01	0.5	0.03	-0.5	2930.9	ALEAKAVGEK
LEPKTSLIGKKKPAAAKKGLG	0.9	ABP	-0.2	-0.55	0.58	5	2135.94	LEPKTSLIGK
ALAVSHNGVLYIAETDEKK	1.01	ABP	-0.1	-0.12	0.13	-0.5	2058.6	ALAVSHNGVL
QKEKVLRLLFAKMNGFV	0.99	ABP	-0.14	0.12	0.01	3	2021.76	QKEKVLRLLF
RVLRDIVHKPGPIVL	1.36	ABP	-0.11	0.4	-0.01	2.5	1712.35	RVLRDIVHKP
VHKGYAFVQYANERHARAAV	0.91	ABP	-0.18	-0.42	-0.13	3	2287.85	VHKGYAFVQY
LTKRGLAERTGAIHVGDR	0.93	ABP	-0.29	-0.57	0.49	2.5	1950.5	LTKRGLAERT
ENIQEVVGHITEGVCRPLKV	1.2	ABP	-0.11	0	0.1	-0.5	2220.89	ENIQEVVGHI
AVVAQSIHETVLAAMKRL	0.92	ABP	-0.02	0.76	-0.26	1.5	1937.6	AVVAQSIHET
LIEKQPGHIRSRVFREVE	1.04	ABP	-0.32	-0.74	0.56	1.5	2193.81	LIEKQPGHIR
LRRRGKNKVAAQNCRKRKLETIVQL	2.13	ABP	-0.5	-1.05	0.73	8	2979.97	LRRRGKNKVA
VASYARILGAVLHMHSAHARKKALATCSSH	0.97	ABP	-0.1	0.2	-0.25	6	3188.17	VASYARILGA
LQVIVRRRGRGAHPAEEVRVGRLFMVD	1.26	ABP	-0.27	-0.21	0.33	3.5	3118.08	LQVIVRRRGR
KVWMGKMQKKAVAISLPKGVVEVTHDLQK	1.09	ABP	-0.14	-0.17	0.13	4.5	3250.43	KVWMGKMQKK
YASAHLDNLKRHQRVHT	1.08	ABP	-0.36	-1.2	0.14	3.5	2046.53	YASAHLDNLK
QEVKERAISCMGHLVGHLGDR	1.09	ABP	-0.21	-0.41	0.3	1	2336.01	QEVKERAISC
HGWVAHALSKLRL	1.64	ABP	-0.06	0.18	-0.46	3	1487.97	HGWVAHALSK
QQVVTSTGCIIKDVHLACLEGAREESVHLVRHF	1.43	ABP	-0.1	0.17	-0.07	0.5	3676.74	QQVVTSTGCI
LRDWVKARAAVVNVRGLMCQGPEKVRGMAIKDITS	1.15	ABP	-0.19	-0.04	0.19	4	3870.15	LRDWVKARAA
KGHAGQRRHLCADCGHSFDWKSQLVIHRK	1.16	ABP	-0.32	-0.97	0.25	6	3372.29	KGHAGQRRHL
KKIIEVHVEKGMKDGQKILFHG	1.47	ABP	-0.17	-0.49	0.42	3	2535.41	KKIIEVHVEK
AFILHSVLHIASRGGKLKALS	1.5	ABP	0.01	0.7	-0.35	4	2219	AFILHSVLHI
VLAHTILGVAWNEITGQ	0.97	ABP	0.12	0.69	-0.74	-0.5	1822.37	VLAHTILGVA
GKAPLGVGLRHSAKRDRKSL	0.96	ABP	-0.36	-0.85	0.66	5.5	2146.82	GKAPLGVGLR
GFRQEAICLVKGSHKT	1.4	ABP	-0.19	-0.33	0.16	2.5	1774.31	GFRQEAICLV
LDNKHTVFGRVTKGMEVVQRISNV	1.22	ABP	-0.2	-0.27	0.11	2.5	2728.54	LDNKHTVFGR
RNHWKKTTAGICLLTWGGHWVYG	1.03	ABP	-0.07	-0.4	-0.6	4	2685.47	RNHWKKTTAG
FVILTGAASFLMVTHLAINVSKARKKYKVEYP	1.1	ABP	-0.03	0.44	-0.33	4.5	3596.82	FVILTGAASF
LLFVFHKNGHLSYKAKV	1.28	ABP	-0.04	0.18	-0.45	4	2001.67	LLFVFHKNGH
HSVIWHLKQIGKVKKVDKYMFHKLT	1.47	ABP	-0.16	-0.41	-0.06	6.5	3065.14	HSVIWHLKQI
NKVQVKITVKGKGLQELESRLLVPGDVLL	1.03	ABP	-0.12	0.1	0.15	2	3175.3	NKVQVKITVK
TSGIVLVLLIISILVQVKQPRKKVMA	1.04	ABP	0.05	1.17	-0.43	4	2848.06	TSGIVLVLLI
DIRLWVNGCKIANRGAELLVLLVNHG	1.06	ABP	-0.04	0.42	-0.28	1.5	2874.82	DIRLWVNGCK
LEILVFCILLYFHKRKGMKHIVIL	1.31	ABP	0.08	1.15	-0.62	4	2928.14	LEILVFCILL
VEQMCIQVKEVGDRVNYIKRS	0.97	ABP	-0.28	-0.48	0.37	1	2495.23	VEQMCIQVKE
EATRKIWMVDSKGLIVKGRS	0.98	ABP	-0.23	-0.34	0.38	3	2275.01	EATRKIWMVD
EPPMSGLPEF	0.947	AMP	-0.02	-0.45	0.07	-2	1103.39	EPPMSGLPEF
TPQSSQGTPY	1	AMP	-0.22	-1.49	-0.21	0	1065.24	TPQSSQGTPY
LASLTSGLAVGKTPL	0.908	AMP	0.1	0.91	-0.46	1	1427.93	LASLTSGLAV
TSSMPKMMAIFWF	0.976	AMP	0.11	0.68	-0.88	1	1577.13	TSSMPKMMAI
SPSSPPASAPH	0.989	AMP	-0.11	-0.84	-0.03	0.5	1034.22	SPSSPPASAP
YVDPTTMYE	1	AMP	-0.1	-0.72	-0.24	-2	1118.34	YVDPTTMYE
ASSLLQKSKLGFL	0.916	AMP	-0.04	0.44	-0.24	2	1391.87	ASSLLQKSKL
GKQQTVMAIATKIALQMN	0.936	AMP	-0.07	0.14	-0.28	2	1946.64	GKQQTVMAIA
RGSSPSSCGSS	0.932	AMP	-0.28	-0.84	0.35	1	1011.16	RGSSPSSCGS
TTDTSVHG	0.998	AMP	-0.15	-0.73	0.01	-0.5	816.93	TTDTSVHG
NVPKIKHRKKL	0.942	AMP	-0.5	-1.45	0.87	5.5	1360.88	NVPKIKHRKK
LPLGAVDDGEH	0.9	AMP	-0.03	-0.23	0.26	-2.5	1122.36	LPLGAVDDGE
CTGPNGCS	0.979	AMP	-0.09	-0.3	-0.24	0	737.9	CTGPNGCS
RRGRRPGIRAVPRAAVRGDRDPPVLFRHYPD	0.911	AMP	-0.45	-1.15	0.68	6.5	3610.58	RRGRRPGIRA
ACMMAFMVK	0.997	AMP	0.15	1.66	-0.77	1	1031.49	ACMMAFMVK
AFPGAGIGGGVKPQKP	0.903	AMP	0.01	-0.19	-0.04	2	1480.97	AFPGAGIGGG
CLASNTAGDKSKSFSLNVLVSPIIAG	0.909	AMP	0	0.54	-0.25	1	2593.37	CLASNTAGDK
PASGFFRSLMS	0.911	AMP	-0.02	0.38	-0.43	1	1199.53	PASGFFRSLM
SPTVLHKMS	0.947	AMP	-0.1	-0.12	-0.21	1.5	999.32	SPTVLHKMS
EPEGAGAKSPMCQK	0.925	AMP	-0.24	-1.08	0.66	0	1432.82	EPEGAGAKSP
GEGGRKNSSNFKK	0.975	AMP	-0.49	-2.05	1.04	3	1408.72	GEGGRKNSSN
ESAEGETDHSGYT	0.958	AMP	-0.25	-1.58	0.65	-3.5	1382.49	ESAEGETDHS
GAHMNKGMGHKFL	0.993	AMP	-0.1	-0.52	-0.17	3	1427.91	GAHMNKGMGH
GIIGALPGNQLAINGIVGALNG	0.991	AMP	0.19	0.95	-0.67	0	2032.74	GIIGALPGNQ
LPLLLLAVIVPGGDNEDAF	0.983	AMP	0.16	1.07	-0.43	-3	1966.6	LPLLLLAVIV
RFGRRRPFILVLAIG	0.963	AMP	-0.15	0.52	-0.15	4	1771.41	RFGRRRPFIL
AGKMEEHMKKEMQESQ	0.951	AMP	-0.41	-1.85	1.05	-0.5	1921.43	AGKMEEHMKK
FITGKGIVAIMRCLQFN	0.917	AMP	0.06	0.96	-0.62	2	1911.62	FITGKGIVAI
TPRKHTTLKEEK	0.996	AMP	-0.56	-2.19	1.21	2.5	1467.86	TPRKHTTLKE
GKKPSFMVIRFPGRRGYGRL	0.925	AMP	-0.29	-0.64	0.23	6	2323.1	GKKPSFMVIR
FRLHVGVLQKGSVGLV	0.931	AMP	0.04	0.87	-0.49	2.5	1709.33	FRLHVGVLQK
GSSIFSISFPLLIKTLGAKIKLAQT	0.978	AMP	0.06	0.81	-0.43	3	2634.59	GSSIFSISFP
LSGVPGGIGGVESGAGLLSGVTMFH	0.954	AMP	0.17	0.82	-0.52	-0.5	2300.03	LSGVPGGIGG
LAQKKAISFLGCAIQMFSF	0.942	AMP	0.08	0.95	-0.61	2	2103.85	LAQKKAISFL
LAGGSCAIGGGYGGRIGVGYGFGGGAGSGFGFGAGAGS	0.961	AMP	0.16	0.52	-0.49	1	3185.04	LAGGSCAIGG
VDDLNISGIIAAVVIVALVISVCGLGVCYAQRK	0.997	AMP	0.13	1.48	-0.55	0	3373.59	VDDLNISGII
AAQALVSSGCPGSIINISSIIGKVGNMGQT	0.996	AMP	0.06	0.61	-0.42	1	2874.79	AAQALVSSGC
AKDHRMKLMQ	0.966	AMP	-0.45	-1.31	0.68	2.5	1257.68	AKDHRMKLMQ
GGIYIGSIMKGGAV	0.92	AMP	0.19	0.96	-0.55	1	1322.81	GGIYIGSIMK
QHTKQMKKSH	1	AMP	-0.57	-2.47	0.7	4	1252.61	QHTKQMKKSH
LNISCEDSSQAELVDFFLALM	0.907	AMP	0.03	0.67	-0.26	-4	2345.97	LNISCEDSSQ
VGGSATGLLALSGALAAQAQLAA	0.94	AMP	0.16	1.16	-0.6	0	2011.65	VGGSATGLLA
TCLDGQALDSLIRGIIEAYKNGDIVLG	0.927	AMP	-0.02	0.36	-0.07	-2	2848.69	TCLDGQALDS
RFVGLLILGIAALISAITSVTVAAISLTQQ	0.922	AMP	0.19	1.64	-0.81	1	3041.16	RFVGLLILGI
FLLKTVVALGSVASRLTVG	0.959	AMP	0.1	1.38	-0.57	2	1931.64	FLLKTVVALG
SLPSSDEELLGVGVGVGAALQDALYP	0.942	AMP	0.05	0.42	-0.16	-4	2558.23	SLPSSDEELL
LLVDSKISLGIAGVLIVLS	0.902	AMP	0.23	1.91	-0.66	0	1910.68	LLVDSKISLG
AKGERLREGANINRSLLALINVL	0.958	AMP	-0.18	0.05	0.14	2	2521.32	AKGERLREGA
GGLPGIVFGGAVGGLLGSWVMNGKFKPVPQL	0.94	AMP	0.15	0.67	-0.6	2	3054.17	GGLPGIVFGG
DICNQIHVYGGAVSSGMICAGFLKGKLDACEGDSGGPLV	0.931	AMP	0.02	0.37	-0.18	-1.5	3884.04	DICNQIHVYG
CANFLKRQNIGVATFIGLDKMAVWAKKM	0.908	AMP	-0.07	0.27	-0.21	4	3155.27	CANFLKRQNI
KRPPGFSPFRS	0.952	AMP	-0.36	-1.28	0.42	3	1275.61	KRPPGFSPFR
LGTLIGAPVGISLIAGL	0.907	AMP	0.32	1.87	-0.89	0	1565.21	LGTLIGAPVG
APKRFPKPNLHKKVMVTVW	0.933	AMP	-0.21	-0.54	0.02	5.5	2277.1	APKRFPKPNL
VLQTPIEVIQADSPAIVVGEEY	0.997	AMP	0.05	0.47	-0.19	-4	2371.02	VLQTPIEVIQ
GPAKLSPCCHSPAPKPPPA	0.925	AMP	-0.11	-0.53	0.04	2.5	1855.45	GPAKLSPCCH
KDRLRINRFAWPKILKISYKRSNFYL	0.942	AMP	-0.32	-0.71	0.14	7	3327.37	KDRLRINRFA
EEESTKEDNTALL	1	AMP	-0.33	-1.36	1.05	-4	1478.71	EEESTKEDNT
LVKMNCMAMGIPK	0.982	AMP	0.01	0.71	-0.33	2	1436.08	LVKMNCMAMG
LIGIGVGAGAYILSRFALNHP	0.942	AMP	0.15	0.99	-0.74	1.5	2139.86	LIGIGVGAGA
PLPNNGGPPPAPAPPGLAPPPPPGLFFGVGP	0.93	AMP	0.09	-0.17	-0.42	0	2894.82	PLPNNGGPPP
LKAEVADLRAAAVKLSALNEALALDKVGLNQQ	0.902	AMP	-0.1	0.26	0.13	0	3334.36	LKAEVADLRA
RGSGCSVSCMNGGSCRG	0.989	AMP	-0.2	-0.24	0.09	2	1618.04	RGSGCSVSCM
VTQDQPDISSQVGQSVTLNCQYET	0.942	AMP	-0.18	-0.66	-0.06	-3	2641.18	VTQDQPDISS
VVLIAAVTSISNSLHK	0.924	AMP	0.1	1.19	-0.59	1.5	1652.21	VVLIAAVTSI
VQSLEASILNDTSGDYE	0.987	AMP	-0.13	-0.45	0.19	-4	1841.16	VQSLEASILN
FGQQANNSQLIMRIALGGLL	0.903	AMP	0	0.42	-0.56	1	2144.85	FGQQANNSQL
AFVGLKRAFRKAPLLY	0.961	AMP	-0.09	0.41	-0.23	4	1850.51	AFVGLKRAFR
DTYSWSTVTEL	0.976	AMP	-0.09	-0.45	-0.33	-2	1301.52	DTYSWSTVTE
GLINSMVKSPMA	0.945	AMP	0.03	0.59	-0.37	1	1247.71	GLINSMVKSP
LQLIKAVSQLIADAGIGGSR	0.909	AMP	0	0.64	-0.19	1	2010.68	LQLIKAVSQL
LRQIQELIISRLNQAVAN	0.902	AMP	-0.16	0.11	-0.17	1	2079.72	LRQIQELIIS
TTSYTPSSTPHPSA	0.998	AMP	-0.15	-0.96	-0.26	0.5	1433.67	TTSYTPSSTP
QSGDSESDSDSYSSR	0.908	AMP	-0.46	-1.95	1	-3	1606.67	QSGDSESDSD
AGLGALPGAFPGALVPGGPAGAAAAYK	0.907	AMP	0.18	0.75	-0.49	1	2323.08	AGLGALPGAF
EEERRKKEQAVQV	1	AMP	-0.63	-2.12	1.61	0	1628.99	EEERRKKEQA
VLGGLISGAGGGGGGGGGGGGGGGGTAMRILGGVIS	0.955	AMP	0.18	0.66	-0.36	1	2798.74	VLGGLISGAG
ETAPAAAGGQMK	0.95	AMP	-0.09	-0.41	0.21	0	1131.43	ETAPAAAGGQ
VVLKLFLAAVLSALVTG	0.929	AMP	0.28	2.25	-0.95	1	1714.43	VVLKLFLAAV
DSSMMPIMGY	0.999	AMP	0.04	0.18	-0.44	-1	1131.48	DSSMMPIMGY
GTKGMGKETT	0.973	AMP	-0.26	-1.27	0.65	1	1009.29	GTKGMGKETT
GSPLILIASSGPSSSVF	0.948	AMP	0.15	0.98	-0.58	0	1619.09	GSPLILIASS
ANRKLAKLYKVSNGAGTMSVSL	0.928	AMP	-0.15	-0.06	-0.03	4	2309.05	ANRKLAKLYK
QSTATRNTKY	0.943	AMP	-0.47	-1.78	0.27	2	1169.39	QSTATRNTKY
PGYGPPPGPPPPQQGPPPPPG	0.926	AMP	-0.07	-1.48	-0.09	0	1985.53	PGYGPPPGPP
LGPKDPMKSKQ	0.959	AMP	-0.38	-1.58	0.85	2	1228.63	LGPKDPMKSK
AIIIGFGQIKNLLGLQH	0.944	AMP	0.14	0.89	-0.74	1.5	1835.52	AIIIGFGQIK
LGVATAGGAVTITSDLSLIF	0.937	AMP	0.21	1.43	-0.68	-1	1906.51	LGVATAGGAV
ASQKNFKAKNKA	0.969	AMP	-0.44	-1.56	0.74	4	1334.7	ASQKNFKAKN
EGEKTSMKLNK	0.967	AMP	-0.42	-1.67	1.09	1	1264.62	EGEKTSMKLN
PGPPVVPEMP	0.936	AMP	0.05	-0.16	-0.13	-1	1019.36	PGPPVVPEMP
SNPDSTYED	1	AMP	-0.38	-2.13	0.79	-3	1027.07	SNPDSTYED
LFANGIKFGFGSRHLPNRVGSGA	0.925	AMP	-0.06	0	-0.26	3.5	2403.09	LFANGIKFGF
PEYSEVAYPDYFG	0.904	AMP	-0.06	-0.77	-0.16	-3	1536.78	PEYSEVAYPD
LSVKAGFPKGVINIIPGSGGVVGQ	0.953	AMP	0.1	0.7	-0.38	2	2295.11	LSVKAGFPKG
QVEPAAQAELLSQLQDGEFWV	0.966	AMP	-0.05	-0.18	-0.13	-4	2358.91	QVEPAAQAEL
SPTPSMMPSPNSHTAGF	0.961	AMP	-0.07	-0.57	-0.32	0.5	1746.17	SPTPSMMPSP
RMVVAMMMK	0.997	AMP	-0.05	1.04	-0.3	2	1096.62	RMVVAMMMK
FLKPLAKLFSVIKN	0.985	AMP	0	0.71	-0.34	3	1618.25	FLKPLAKLFS
LVSGFVSGITGIVTKPL	0.934	AMP	0.19	1.31	-0.67	1	1688.31	LVSGFVSGIT
GAPSPMRFTFPQA	0.926	AMP	-0.07	-0.28	-0.32	1	1406.79	GAPSPMRFTF
DPTYDYPGPSQPGP	1	AMP	-0.18	-1.67	0.11	-2	1490.73	DPTYDYPGPS
PPGGRKMTVFL	0.927	AMP	-0.08	-0.04	-0.14	2	1202.64	PPGGRKMTVF
PGRSKIKFDMEKM	0.975	AMP	-0.36	-1.15	0.88	2	1567.08	PGRSKIKFDM
VPDTMGKEM	0.9	AMP	-0.16	-0.62	0.5	-1	1007.31	VPDTMGKEM
LITELVNDTNVQFLDQ	0.986	AMP	-0.07	0.08	-0.23	-3	1862.32	LITELVNDTN
ADLLEQIPDLGEDVKD	0.98	AMP	-0.17	-0.53	0.75	-5	1770.16	ADLLEQIPDL
ANRSLSAVVSFPIITAGPGFIAT	0.914	AMP	0.12	0.99	-0.6	1	2289.99	ANRSLSAVVS
VAGVVPAAAAAAKAAAKAAQFGVSP	0.972	AMP	0.11	1	-0.32	2	2194.89	VAGVVPAAAA
VKATVAVLSFILSSAA	0.952	AMP	0.19	1.73	-0.68	1	1577.12	VKATVAVLSF
PPTSTSSPPSTASF	1	AMP	-0.09	-0.56	-0.19	0	1363.61	PPTSTSSPPS
LITVPGGSDGPSGVLICSENY	0.975	AMP	0.06	0.37	-0.32	-2	2078.64	LITVPGGSDG
AVSYLKHSKAFA	0.901	AMP	-0.06	0.19	-0.29	2.5	1321.7	AVSYLKHSKA
KFQSEEQQQTEDELQDKL	0.953	AMP	-0.46	-2.08	1.04	-4	2223.61	KFQSEEQQQT
FLISVLIITNGGSISVV	0.932	AMP	0.29	1.98	-1.01	0	1732.37	FLISVLIITN
PGTCDIPGNIGICGTFSEGF	0.902	AMP	0.08	0.31	-0.34	-2	1985.51	PGTCDIPGNI
GPKPGDSGYETETP	0.931	AMP	-0.24	-1.71	0.66	-2	1434.67	GPKPGDSGYE
LFKPLVLRRQYLRRKHLG	0.942	AMP	-0.36	-0.54	0.13	6.5	2294.12	LFKPLVLRRQ
VAFVGGLVGGPPGLAVGGAVGGL	0.939	AMP	0.3	1.47	-0.73	0	1921.64	VAFVGGLVGG
GGVITISSISIFT	0.962	AMP	0.25	1.57	-0.85	0	1294.71	GGVITISSIS
FDPTMSKKKKK	0.993	AMP	-0.53	-1.95	1.28	4	1337.79	FDPTMSKKKK
VVAVVAGVALGLGVSGAGGAFALGPARLEAF	0.92	AMP	0.23	1.52	-0.61	0	2797.76	VVAVVAGVAL
DSYDGQDYY	1	AMP	-0.32	-2.12	0.29	-3	1125.18	DSYDGQDYY
GLVLAISIMAGGQVFKQ	0.915	AMP	0.16	1.2	-0.66	1	1732.39	GLVLAISIMA
PSSCTTSCAH	0.967	AMP	-0.13	-0.18	-0.29	0.5	993.19	PSSCTTSCAH
ASVALTSISNVTAFF	0.946	AMP	0.17	1.36	-0.85	0	1527.94	ASVALTSISN
RRAEKELQEERSEKLRR	0.905	AMP	-0.81	-2.51	1.91	2	2213.72	RRAEKELQEE
VGLSVADLLDSIVNDKKKVHSVS	0.991	AMP	-0.09	0.27	0.16	0.5	2424.14	VGLSVADLLD
GAGGGGGGGGPGGGGSGGAGGYAPY	0.942	AMP	0.12	-0.32	-0.23	0	1809.19	GAGGGGGGGG
VIGAQAGRRGRLHAVPSQGLWLLGLRDGKL	0.908	AMP	-0.13	-0.01	-0.08	4.5	3196.25	VIGAQAGRRG
TLSDLALALLDGTVFEIVQGLLEIQ	0.975	AMP	0.12	1.06	-0.43	-4	2672.52	TLSDLALALL
PPPPPPPSSVLASGHHT	0.994	AMP	-0.05	-0.66	-0.25	1	1675.11	PPPPPPPSSV
VLVMSKGMLKNSTA	0.96	AMP	-0.03	0.54	-0.24	2	1479.04	VLVMSKGMLK
GVIVISGALAIIMASYACIISAVL	0.964	AMP	0.34	2.34	-1.05	0	2349.3	GVIVISGALA
LPGVGVGGAGIPGAPGAIPGIGG	0.92	AMP	0.26	0.9	-0.51	0	1841.51	LPGVGVGGAG
LLLRARKFALLWSLGSALALAGGTLLRGGA	0.944	AMP	0.05	0.97	-0.49	4	3067.2	LLLRARKFAL
LGSGGLLGGGGLLSYGGVFGV	0.921	AMP	0.26	1.11	-0.77	0	1837.46	LGSGGLLGGG
LSEPIDGGAGGNGLVGPGGSGAGPGGGLTPSAPPYG	0.929	AMP	0.07	-0.13	-0.16	-2	3048.83	LSEPIDGGAG
RPASSVSLLCRPTCSRPACCIP	0.978	AMP	-0.17	0.28	-0.1	3	2318.07	RPASSVSLLC
LGQDLSGNITSDLILENIKSLIGCFNLDP	0.982	AMP	-0.01	0.29	-0.18	-3	3104	LGQDLSGNIT
CQGDSGGPLVCGGVLQGLVSWGSV	0.963	AMP	0.1	0.62	-0.52	-1	2275.96	CQGDSGGPLV
LASILGKSNLRFAGMSIAVSL	0.908	AMP	0.07	1.08	-0.49	2	2148.91	LASILGKSNL
ARGIRKAFSTCGSHLTVVSLFYGTL	0.904	AMP	-0.03	0.52	-0.45	3.5	2685.51	ARGIRKAFST
VGMAVVKGIQSSGKV	0.962	AMP	0.03	0.73	-0.19	2	1460	VGMAVVKGIQ
SSSDSESSPGAP	0.982	AMP	-0.22	-1.13	0.61	-2	1107.19	SSSDSESSPG
KPPPDSHYV	0.997	AMP	-0.24	-1.48	0.22	0.5	1039.27	KPPPDSHYV
SDDSAQSGSEGGPAGAPY	0.964	AMP	-0.14	-0.99	0.37	-3	1652.84	SDDSAQSGSE
AAILSKFMSVFCG	0.96	AMP	0.18	1.55	-0.75	1	1373.87	AAILSKFMSV
PPPPPPPQAPPGQPAK	0.903	AMP	-0.16	-1.48	0.15	1	1573.04	PPPPPPPQAP
LGISNVQPLLLLIQW	0.949	AMP	0.19	1.2	-1.11	0	1707.35	LGISNVQPLL
FGDLLFSLHAIVKLGL	0.908	AMP	0.2	1.43	-0.75	0.5	1743.38	FGDLLFSLHA
LVRKQGTIFLGGPPLVKA	0.932	AMP	-0.01	0.44	-0.24	3	1894.62	LVRKQGTIFL
LAPKSRLGHLLKIPVLKFLL	0.942	AMP	0.01	0.81	-0.35	4.5	2257.22	LAPKSRLGHL
RASIQGLGKSCSPVYIGGSTVPCGIGTNASPRAC	0.934	AMP	-0.06	0.14	-0.2	3	3309.29	RASIQGLGKS
VFLKKKSLTVKVDV	0.963	AMP	-0.12	0.47	0.2	3	1604.22	VFLKKKSLTV
LPDVLADLGGPEVPHDSDASG	0.964	AMP	-0.05	-0.23	0.27	-4.5	2061.49	LPDVLADLGG
FIPKSGSAFCLVSILKP	0.958	AMP	0.09	0.99	-0.49	2	1807.47	FIPKSGSAFC
ATLGVEDQVQGEGAGGQLGISLNMCL	0.946	AMP	0.02	0.3	-0.22	-3	2561.3	ATLGVEDQVQ
VAVDPDTGTIYVSDGY	0.95	AMP	0.01	0.08	-0.18	-3	1672	VAVDPDTGTI
PVAKKMGKMAMRK	1	AMP	-0.33	-0.66	0.66	5	1476.12	PVAKKMGKMA
AALKRRKTQTQLIKS	0.936	AMP	-0.44	-0.95	0.57	5	1742.32	AALKRRKTQT
PGKRTIWKN	0.963	AMP	-0.4	-1.66	0.4	3	1099.43	PGKRTIWKN
APPGPGHRHGPGYGK	0.926	AMP	-0.19	-1.51	0.15	3	1484.86	APPGPGHRHG
AGISGKSQVLFAVVF	0.964	AMP	0.17	1.35	-0.69	1	1523.03	AGISGKSQVL
LTHRILSLGKQCLCFSGLKL	0.904	AMP	-0.04	0.65	-0.41	3.5	2231.08	LTHRILSLGK
EGLMRFYKP	0.934	AMP	-0.22	-0.74	0.12	1	1140.49	EGLMRFYKP
FACAPHGYGAIAAAPP	0.904	AMP	0.16	0.66	-0.69	0.5	1513.94	FACAPHGYGA
EEEPAAAAGPAGPGPYGY	0.964	AMP	-0.01	-0.67	0.11	-3	1704.02	EEEPAAAAGP
EMRERHPYTIPYG	0.953	AMP	-0.33	-1.52	0.26	0.5	1649.04	EMRERHPYTI
KGTFLGNKWKKF	0.924	AMP	-0.23	-1.01	0.13	4	1453.93	KGTFLGNKWK
PGAPGGSGAPAPQY	0.962	AMP	0.01	-0.59	-0.24	0	1226.5	PGAPGGSGAP
WTKIATKMGFAPGK	0.966	AMP	-0.07	-0.26	-0.13	3	1536.07	WTKIATKMGF
DASSEKMMKTTASK	0.967	AMP	-0.34	-1.08	0.82	1	1514.91	DASSEKMMKT
LLQDLLDQERQEQQQQRQ	0.984	AMP	-0.53	-1.99	0.69	-2	2296.78	LLQDLLDQER
NIMKGFSAAAAIVLSTIASV	0.908	AMP	0.17	1.43	-0.64	1	1964.64	NIMKGFSAAA
RQPPTSCRY	0.997	AMP	-0.53	-1.78	0.31	2	1107.36	RQPPTSCRY
GFKYVIGIGVGAGAYV	0.9	AMP	0.25	1.22	-0.82	1	1571.1	GFKYVIGIGV
ARGRVVNVSSIMGRVALLGG	0.903	AMP	-0.05	0.71	-0.19	3	2012.71	ARGRVVNVSS
LRGGQKKLVLVLNKSDLVPK	0.969	AMP	-0.2	-0.11	0.26	4	2206.04	LRGGQKKLVL
TVGVLGDNEADCY	0.977	AMP	-0.05	-0.02	0.02	-3	1355.62	TVGVLGDNEA
GAMKPTRSGTKW	0.972	AMP	-0.29	-1.18	0.27	3	1319.71	GAMKPTRSGT
GCWGKKKKKK	1	AMP	-0.59	-2.26	1.36	6	1190.66	GCWGKKKKKK
ATVLATDSDDGINADLNYS	0.992	AMP	-0.09	-0.21	0.08	-4	1955.28	ATVLATDSDD
DYTGVSMLVEV	0.97	AMP	0.07	0.74	-0.36	-2	1212.54	DYTGVSMLVE
FLKLHAILRNSAQ	0.903	AMP	-0.11	0.22	-0.35	2.5	1511	FLKLHAILRN
YNRGSRKKDDYL	0.927	AMP	-0.61	-2.27	1.01	2	1514.82	YNRGSRKKDD
VVKLMVPLLKFYF	0.901	AMP	0.19	1.6	-0.96	2	1597.28	VVKLMVPLLK
DEDTGANGYS	0.999	AMP	-0.26	-1.58	0.63	-3	1028.08	DEDTGANGYS
VSLGFFGSIFALIGMKCTKVGGSDK	0.926	AMP	0.07	0.77	-0.32	2	2563.45	VSLGFFGSIF
EQDTPDAPPRPTSYY	0.998	AMP	-0.34	-1.86	0.44	-2	1737	EQDTPDAPPR
CLLHLFGAIVAGGQKNALQAL	0.962	AMP	0.12	1.02	-0.7	1.5	2137.91	CLLHLFGAIV
GIAVFQVGIKMYVSIPK	0.952	AMP	0.12	0.99	-0.59	2	1850.56	GIAVFQVGIK
AKTMGVPIRKF	0.927	AMP	-0.15	0.02	0.09	3	1247.72	AKTMGVPIRK
PKKKMRKTEN	1	AMP	-0.74	-2.75	1.65	4	1259.67	PKKKMRKTEN
VGVAPGIGLGPGGVIGAGVPAAAKSA	0.987	AMP	0.21	1.07	-0.43	1	2143.91	VGVAPGIGLG
YDPAEGPGSPS	0.977	AMP	-0.13	-1.25	0.35	-2	1076.22	YDPAEGPGSP
CCQPTCCGSS	0.991	AMP	-0.11	0.22	-0.36	0	988.25	CCQPTCCGSS
WQLLGFVTNGKPSAIFK	0.903	AMP	0.03	0.24	-0.56	2	1906.52	WQLLGFVTNG
GLLLVVKASFGVGTSSN	0.945	AMP	0.11	0.99	-0.54	1	1649.18	GLLLVVKASF
GGRPRRRQGLAAVQWF	0.901	AMP	-0.34	-0.89	0.14	4	1855.37	GGRPRRRQGL
CMGKLPKGFR	0.901	AMP	-0.23	-0.37	0.24	3	1136.58	CMGKLPKGFR
AHGVFSGSLNILLKFLIS	0.949	AMP	0.17	1.22	-0.79	1.5	1916.58	AHGVFSGSLN
LDLSDEQGLSALHL	0.944	AMP	-0.04	0.11	-0.01	-2.5	1510.88	LDLSDEQGLS
VVAGVSAILGGVIALN	0.936	AMP	0.31	2.08	-0.89	0	1453.01	VVAGVSAILG
GGGGGGGGGGAPVCGASGLCKTNCGVCCKAELGL	0.958	AMP	0.06	0.42	-0.17	1	2868.81	GGGGGGGGGG
AAPPAGLLGSGGGFKACSVAGSWVCPR	0.912	AMP	0.06	0.51	-0.37	2	2517.3	AAPPAGLLGS
LIALALLGNISSIAFFNFAGISVTKE	0.96	AMP	0.18	1.33	-0.71	0	2710.61	LIALALLGNI
LALLLAGLLLQGTLAKSIGT	0.959	AMP	0.19	1.48	-0.75	1	1966.77	LALLLAGLLL
VCGYGEVGKGCCAALKALGAIV	0.951	AMP	0.12	1.13	-0.37	1	2082.85	VCGYGEVGKG
AHRPLRALRLASRGM	0.94	AMP	-0.33	-0.35	0.24	4.5	1705.27	AHRPLRALRL
PPPPPPPPAPAPQPPPPPPPPATPAAA	0.974	AMP	-0.03	-0.88	-0.12	0	2519.28	PPPPPPPPAP
LSTVIGLLSCLIGYCSSHWCCKKEVQET	0.926	AMP	-0.01	0.48	-0.41	0.5	3102.09	LSTVIGLLSC
GKKASRMKKEASVKFH	0.982	AMP	-0.42	-1.26	0.93	5.5	1832.42	GKKASRMKKE
YSYCSRSPCQNGGTCINARTSFICACRHPF	0.902	AMP	-0.18	-0.26	-0.32	3.5	3344.2	YSYCSRSPCQ
FASFMLGLGALVFSLPKFF	0.913	AMP	0.27	1.63	-1.05	1	2092.85	FASFMLGLGA
LLGALPLPLLLLLPLLLLPPS	0.931	AMP	0.32	2	-1.12	0	2190.24	LLGALPLPLL
EELNDDLLQSDNED	0.998	AMP	-0.38	-1.74	1.18	-7	1648.81	EELNDDLLQS
AGSGFGLGGGAGFGGGFGGPGFPVCPPGG	0.945	AMP	0.2	0.42	-0.52	0	2396.08	AGSGFGLGGG
LKKAFSKENMQK	0.925	AMP	-0.41	-1.38	0.8	3	1451.92	LKKAFSKENM
VKLEDLIVKDGLTDV	0.962	AMP	-0.07	0.37	0.39	-2	1657.17	VKLEDLIVKD
AQSKHLTKLISKR	0.953	AMP	-0.37	-0.87	0.46	4.5	1510.01	AQSKHLTKLI
LGPGSTGLLVGQKFP	0.908	AMP	0.07	0.31	-0.42	1	1470.97	LGPGSTGLLV
GATGVTSSAGIKSPITIITTKVMT	0.956	AMP	0.05	0.61	-0.33	2	2335.12	GATGVTSSAG
LKELQQKINNSSNKIQV	0.946	AMP	-0.32	-1	0.3	2	1984.56	LKELQQKINN
TYDPNYNYDDEDEDENAMDAD	0.914	AMP	-0.39	-2.2	1	-10	2514.66	TYDPNYNYDD
GIIMVGVIVGSKKTGINPDN	0.932	AMP	0.04	0.48	-0.18	1	2012.72	GIIMVGVIVG
AVAARVQTAVTMGKVTKSMAGVV	0.931	AMP	-0.01	0.8	-0.25	3	2276.09	AVAARVQTAV
ALLVGVGGSGKQSLTRLASFIAGYTSFQL	0.929	AMP	0.06	0.68	-0.54	2	2942.86	ALLVGVGGSG
AREQNRRLQHQ	0.973	AMP	-0.75	-2.6	0.91	2.5	1435.73	AREQNRRLQH
GLILVSYSRIAWAVLTIRSA	0.902	AMP	0.08	1.2	-0.72	2	2189.93	GLILVSYSRI
LAVSSLLKVLSIGLPVARQHAS	0.901	AMP	0.04	0.96	-0.45	2.5	2260.06	LAVSSLLKVL
GNMALIQVQATVVGFLASIAAVVFG	0.922	AMP	0.24	1.64	-0.92	0	2477.35	GNMALIQVQA
EEEEEEEESEDGDEED	1	AMP	-0.57	-3.14	2.64	-14	1927.89	EEEEEEEESE
RLLGGRRIGSGRIISART	0.942	AMP	-0.3	-0.19	0.32	5	1939.57	RLLGGRRIGS
PSGLQPPHCLQPCSPGLYGPACQFSCQCHGAPC	0.925	AMP	-0.04	-0.12	-0.5	1	3385.38	PSGLQPPHCL
AYLIRGCLGANAVSGVAAGTGVGILISNLKQSATY	0.945	AMP	0.07	0.77	-0.54	2	3410.49	AYLIRGCLGA
AFLRAAAPPAPLLALLARQLVFFAGAPL	0.967	AMP	0.14	1.29	-0.71	2	2876.93	AFLRAAAPPA
SPPPPPPPPTLLSSGHPVPT	0.928	AMP	-0.02	-0.58	-0.28	0.5	1972.55	SPPPPPPPPT
AYKGQTENVVQLINKGAKVAV	0.918	AMP	-0.11	-0.07	-0.05	2	2230.92	AYKGQTENVV
AKGGHFGVHPAAGCPGGVSQPAAG	0.944	AMP	0.04	0.02	-0.27	2	2130.72	AKGGHFGVHP
YFGTFFGITAVSLTAGAIKGKKPVLIFPL	0.939	AMP	0.15	1.01	-0.67	3	3058.16	YFGTFFGITA
LQGGQIEEVILQAENELSLARKMIQWK	0.95	AMP	-0.14	-0.29	0.09	-1	3126.08	LQGGQIEEVI
GVVSAGSSIFSISFPLLIKTLGAK	0.976	AMP	0.14	1.13	-0.53	2	2393.23	GVVSAGSSIF
NLGNSTVIAPKMLISFLVKKH	0.936	AMP	-0.02	0.43	-0.34	3.5	2311.16	NLGNSTVIAP
VPGVGVASGIGLGPGGVIGAGVPAAAKSAAKAAAKAQFR	0.976	AMP	0.08	0.68	-0.21	4	3430.59	VPGVGVASGI
GGKRKSHGTSFNVDCNICSCFAGNLVCSTRLCL	0.98	AMP	-0.13	0.12	-0.16	3.5	3492.52	GGKRKSHGTS
SQESLDISLCSTGSLGSLGSLGEPLDNAETASVSDMGSM	0.974	AMP	-0.05	0.01	0.05	-6	3847.74	SQESLDISLC
AGKGKGKGGSGDSAVKQVQIDGLVVLKIIKHY	0.933	AMP	-0.1	-0.15	0.19	4.5	3252.34	AGKGKGKGGS
AIPANGSPTSGLSTGAIVGILVVTFVL	0.991	AMP	0.22	1.37	-0.77	0	2555.43	AIPANGSPTS
QNLEEDDDESEEDNSES	0.992	AMP	-0.52	-2.59	1.75	-10	1984.02	QNLEEDDDES

## Sheet: ANTIHYPERTENSIVE
PEPTIDE	SVM SCORE	PREDICTION	HYDROPHOBICITY	HYDROPATHICITY	HYDROPHILLICITY	CHARGE	MOL. WT.	N TERMINAL 10 AA
TRYIFIVKAINQ	1.29	AHT	-0.06	0.41	-0.52	2	1465.94	TRYIFIVKAI
PVGPTGPVGAAG	0.95	AHT	0.15	0.41	-0.37	0	979.27	PVGPTGPVGA
FAKIVIPKGF	1.42	AHT	0.14	1.08	-0.46	2	1119.56	FAKIVIPKGF
DDIEPRPVF	1.34	AHT	-0.23	-0.74	0.69	-2	1087.31	DDIEPRPVF
EPPMSGLPEF	1.06	AHT	-0.02	-0.45	0.07	-2	1103.39	EPPMSGLPEF
VPAPGSGVSFH	1.04	AHT	0.11	0.38	-0.54	0.5	1054.32	VPAPGSGVSF
TVPMTGTKSGNE	0.98	AHT	-0.18	-0.84	0.21	0	1221.52	TVPMTGTKSG
DPASGEGVPPG	1.54	AHT	-0.05	-0.71	0.39	-2	982.16	DPASGEGVPP
RVNLESPGPE	1.12	AHT	-0.28	-1.14	0.62	-1	1097.33	RVNLESPGPE
AIQKCDPAPFYL	1.12	AHT	-0.02	0.15	-0.35	0	1365.77	AIQKCDPAPF
VATSPGEPGLL	1.33	AHT	0.09	0.42	-0.25	-1	1040.34	VATSPGEPGL
KDDPGKGSYWA	1.22	AHT	-0.27	-1.67	0.55	0	1223.45	KDDPGKGSYW
VPVAPEMTGQGS	1.28	AHT	0	-0.03	-0.14	-1	1172.49	VPVAPEMTGQ
CPGLAPTGEME	1.33	AHT	-0.01	-0.15	0.09	-2	1104.41	CPGLAPTGEM
SPAFQDHPL	1.21	AHT	-0.09	-0.64	-0.2	-0.5	1011.22	SPAFQDHPL
LPTTDPRVSPRLS	1.11	AHT	-0.29	-0.65	0.28	1	1438.82	LPTTDPRVSP
APGSSNTESTTSLGE	1.9	AHT	-0.16	-0.84	0.26	-2	1437.64	APGSSNTEST
PPFVAAPLSEMYQ	1.47	AHT	0.05	0.18	-0.53	-1	1449.86	PPFVAAPLSE
PPATTTAPAQPATAPQPPPNSL	1.08	AHT	-0.08	-0.64	-0.23	0	2125.66	PPATTTAPAQ
TPETKPPAPPELTV	1.28	AHT	-0.14	-0.8	0.29	-1	1476.88	TPETKPPAPP
ATGPPSTVVLGPQQS	1.83	AHT	-0.02	-0.11	-0.34	0	1438.82	ATGPPSTVVL
KPLQPSGQNAKAQP	1.03	AHT	-0.3	-1.46	0.31	2	1463.86	KPLQPSGQNA
GPAGGEVEGGGPAPPSL	1.24	AHT	0.04	-0.29	0.12	-2	1448.8	GPAGGEVEGG
PALEPPTLPLHHA	0.99	AHT	0.02	-0.15	-0.37	0	1392.81	PALEPPTLPL
YTSSGCVLCAGPEP	1.51	AHT	0.02	0.26	-0.35	-1	1383.74	YTSSGCVLCA
LSFLTTLAKVYPSS	1.04	AHT	0.05	0.69	-0.65	1	1526.99	LSFLTTLAKV
PGGKGEQGLPGLPGPPGLPGVGKPGFP	1.54	AHT	0.01	-0.49	-0.01	1	2465.28	PGGKGEQGLP
PLPNLPSAQSLPFCSREFLPV	1.83	AHT	-0.03	0.19	-0.38	0	2313.01	PLPNLPSAQS
DTEPSAEHSPESAAPSTEV	1.33	AHT	-0.21	-1.08	0.63	-4.5	1941.19	DTEPSAEHSP
PPSHPASQPPLPASHPT	1.58	AHT	-0.11	-0.99	-0.18	1	1718.13	PPSHPASQPP
KNSEFEGGKSTVNCSTTPV	0.97	AHT	-0.21	-0.79	0.29	0	1985.42	KNSEFEGGKS
EPIVPPPLEFSDSES	1.97	AHT	-0.08	-0.5	0.35	-4	1642.98	EPIVPPPLEF
SPATSSEAFTPKEGS	1.77	AHT	-0.17	-0.85	0.39	-1	1495.75	SPATSSEAFT
LPGPSGNMGPQGPKGIP	0.94	AHT	-0.04	-0.68	-0.07	1	1604.12	LPGPSGNMGP
LAKLLEGTGSETSSS	0.99	AHT	-0.11	-0.21	0.23	-1	1479.82	LAKLLEGTGS
KFPIPSPTFSKSTSAVSEITQPPS	1.93	AHT	-0.1	-0.38	-0.03	1	2534.19	KFPIPSPTFS
KPATPSPATTTFSIYPVS	1.65	AHT	-0.03	-0.09	-0.38	1	1865.35	KPATPSPATT
AQPAQPSQLSQPPS	1.37	AHT	-0.2	-1.1	-0.08	0	1435.75	AQPAQPSQLS
EKVSEKTPAEVDPGSFSSNQC	1.24	AHT	-0.25	-0.99	0.58	-2	2239.68	EKVSEKTPAE
PYECSQCGRSFTTQTHW	2.01	AHT	-0.24	-1.08	-0.29	0.5	2031.44	PYECSQCGRS
QPEPFACGIEHCSV	1.25	AHT	-0.03	0.01	-0.16	-1.5	1516.9	QPEPFACGIE
GALPSPLQPGAGLPALS	0.94	AHT	0.11	0.46	-0.46	0	1546.05	GALPSPLQPG
EQANEDPSDSTESEEV	1.23	AHT	-0.38	-1.89	1.24	-7	1765.88	EQANEDPSDS
PSGTQSEGGGSSSSGTGSPGP	1.03	AHT	-0.12	-1.03	0.21	-1	1778.03	PSGTQSEGGG
KVGELTGRPPMPVHP	1.44	AHT	-0.14	-0.59	0.13	1.5	1615.15	KVGELTGRPP
YPGPFPSLPGFGSSGGVG	1.16	AHT	0.12	0.06	-0.54	0	1680.11	YPGPFPSLPG
SVLPSGEGHLETSS	1.58	AHT	-0.07	-0.34	0.09	-1.5	1399.68	SVLPSGEGHL
PTSSGPSQGSSCLEVLSMSSL	1.08	AHT	-0.05	0.09	-0.19	-1	2054.57	PTSSGPSQGS
QKGGSSVTSRETQD	0.9	AHT	-0.42	-1.63	0.79	0	1479.72	QKGGSSVTSR
EPQQALPPESKGAAS	1.35	AHT	-0.2	-1.03	0.45	-1	1509.84	EPQQALPPES
GPGDSPEGPEAEGPE	1.42	AHT	-0.19	-1.63	0.99	-5	1424.6	GPGDSPEGPE
ESDEIPPFHSLHP	1.78	AHT	-0.12	-0.94	0.19	-2	1504.8	ESDEIPPFHS
RKPPAFSFVSPTNQKTPPAP	1.72	AHT	-0.22	-0.93	0.08	3	2167.76	RKPPAFSFVS
GSSPGPTVLSPLPSP	1.75	AHT	0.02	-0.06	-0.29	0	1392.78	GSSPGPTVLS
KLKSAESSPQSETSVVPRLS	1.11	AHT	-0.27	-0.69	0.47	1	2130.66	KLKSAESSPQ
GGRSGGGLTGPPLGGGG	1.02	AHT	0.02	-0.33	-0.04	1	1353.73	GGRSGGGLTG
VAPGPGLAPPAQPGAP	1.21	AHT	0.09	0.06	-0.32	0	1396.83	VAPGPGLAPP
PEDEVTSSLGDASPEPPNLEREH	1.15	AHT	-0.29	-1.39	0.81	-5.5	2505.91	PEDEVTSSLG
GSAFFEVKQTTEPNFPE	1.61	AHT	-0.13	-0.75	0.14	-2	1928.32	GSAFFEVKQT
PAPTPLGPPGLTNGLLSGDE	1.1	AHT	0	-0.27	-0.1	-2	1903.42	PAPTPLGPPG
SDYLSSNGSFPLEQLKSFPQL	0.92	AHT	-0.11	-0.45	-0.16	-1	2357.91	SDYLSSNGSF
LYPVPDSRFPFLGVHF	1.18	AHT	0.05	0.37	-0.66	0.5	1891.43	LYPVPDSRFP
ATGSPKPTIHWSKL	0.96	AHT	-0.11	-0.6	-0.16	2.5	1522.97	ATGSPKPTIH
VPLNPGGPVSCSDTRHP	1.25	AHT	-0.15	-0.56	0.01	0.5	1733.17	VPLNPGGPVS
VAELARPLSFSPLVLPL	1.22	AHT	0.1	1.14	-0.52	0	1822.47	VAELARPLSF
RASVPPVPGKPRQVLPPGASHFT	1.65	AHT	-0.14	-0.41	-0.04	3.5	2396.12	RASVPPVPGK
LPRSAVLLRLPQS	1.14	AHT	-0.15	0.3	-0.18	2	1449.95	LPRSAVLLRL
TTVAPGSSNTESTTSLGESRTRL	1.63	AHT	-0.25	-0.72	0.25	0	2352.82	TTVAPGSSNT
QQQPSIPPPSGPE	1.6	AHT	-0.21	-1.5	0.18	-1	1361.66	QQQPSIPPPS
GPGGRAGGGGGGPGGPP	1.07	AHT	0	-0.79	0.15	1	1261.58	GPGGRAGGGG
LPFLPGTSPSADGPDSFS	1	AHT	0	-0.17	-0.13	-2	1792.17	LPFLPGTSPS
HYGQSEGQDRDSH	1	AHT	-0.48	-2.47	0.75	-1	1515.66	HYGQSEGQDR
PPPPAQEFQTARL	1.18	AHT	-0.2	-0.92	0.05	0	1451.82	PPPPAQEFQT
GLKGPPGMHGPPGPVGLP	1.44	AHT	0.05	-0.3	-0.22	1.5	1665.27	GLKGPPGMHG
EEVSAQEAAESPVVQFQSLETHSE	1.13	AHT	-0.17	-0.65	0.36	-5.5	2632.09	EEVSAQEAAE
QYPFKVPGPPGTPFVT	2.45	AHT	0.01	-0.31	-0.49	1	1732.24	QYPFKVPGPP
LTGQPGEEPTLMSPGTSCGSLTER	1.22	AHT	-0.15	-0.6	0.16	-2	2449.06	LTGQPGEEPT
GGSGGGPGPGPSP	1.08	AHT	0.02	-0.83	0.05	0	980.19	GGSGGGPGPG
YVPPPPLAASASE	1.75	AHT	0.03	0.05	-0.27	-1	1298.62	YVPPPPLAAS
LPNLSSPSTEGPPGP	1.92	AHT	-0.08	-0.75	0.01	-1	1449.79	LPNLSSPSTE
HPGSLVEKLPDSPA	1.1	AHT	-0.11	-0.52	0.25	-0.5	1446.82	HPGSLVEKLP
QPVTMGAVPAPQAPP	1.34	AHT	0.02	-0.03	-0.39	0	1460.92	QPVTMGAVPA
PPIFGQPTYNTTL	1.31	AHT	0	-0.35	-0.71	0	1448.83	PPIFGQPTYN
SLPAAAPPPPPPPPKAELAEQ	1.34	AHT	-0.08	-0.62	0.16	-1	2075.67	SLPAAAPPPP
TPSSGQFSSSPIQDSAKRYSL	1.02	AHT	-0.23	-0.82	0.1	1	2243.7	TPSSGQFSSS
KSEATFSEEETESPNVKAQ	1.52	AHT	-0.33	-1.43	0.87	-3	2111.46	KSEATFSEEE
PSPDPVGQDPSAEETEAV	1.07	AHT	-0.18	-1.01	0.63	-5	1825.11	PSPDPVGQDP
LTPSAVTFSDQLTPN	1.32	AHT	-0.05	-0.07	-0.35	-1	1590.96	LTPSAVTFSD
CPTLVPPTDSLGPG	1.61	AHT	0.02	0.1	-0.26	-1	1353.75	CPTLVPPTDS
STPSRPGSDGFALEPLLP	1.29	AHT	-0.09	-0.32	0.06	-1	1841.3	STPSRPGSDG
APVRLDLPPEKPLAS	0.95	AHT	-0.14	-0.23	0.29	0	1603.1	APVRLDLPPE
APPSKAPPSGSAP	1.03	AHT	-0.1	-0.72	0.18	1	1163.45	APPSKAPPSG
SPCPTPPHPPPTPQ	1.01	AHT	-0.16	-1.37	-0.13	0.5	1452.83	SPCPTPPHPP
LSPALPPGYSYTGL	1.99	AHT	0.09	0.19	-0.74	0	1435.84	LSPALPPGYS
TPPFSSSCGVLGTG	1.53	AHT	0.07	0.36	-0.48	0	1309.65	TPPFSSSCGV
SSLHASSFTPGTSPTSV	1.76	AHT	-0.03	-0.06	-0.36	0.5	1663	SSLHASSFTP
TSASEGSSDGSGSHHE	0.95	AHT	-0.24	-1.36	0.56	-2	1531.64	TSASEGSSDG
EEPPEVQSLPADEAPAEEATEEVQ	1.02	AHT	-0.22	-1.12	0.85	-9	2595.01	EEPPEVQSLP
FPPLWPHSTTTTSPSLPL	2.07	AHT	0.02	-0.17	-0.69	0.5	1979.52	FPPLWPHSTT
PTGPPGPPGPRGNAGE	1.07	AHT	-0.16	-1.37	0.33	0	1457.79	PTGPPGPPGP
NECGPPSPVDCGSS	1.23	AHT	-0.15	-0.66	0.26	-2	1348.6	NECGPPSPVD
GVFKPKSEEPYGHL	1.75	AHT	-0.16	-0.95	0.26	0.5	1588	GVFKPKSEEP
PEERGTEPPAAMSQE	1	AHT	-0.31	-1.55	0.85	-3	1628.93	PEERGTEPPA
KEEPPSPPQSPRAEGA	1.74	AHT	-0.35	-1.8	0.93	-1	1677.01	KEEPPSPPQS
GESCPAFPSACACSSQT	1.11	AHT	-0.06	0.07	-0.18	-1	1646	GESCPAFPSA
EPGSPGVPGVDGEQGLKG	1.26	AHT	-0.09	-0.76	0.43	-2	1680.08	EPGSPGVPGV
RGPPPSPPPLPPALDGGAAPEE	1.19	AHT	-0.11	-0.84	0.33	-2	2119.66	RGPPPSPPPL
KKPPRTPGGLGQPQGRS	1.1	AHT	-0.39	-1.74	0.62	4	1761.27	KKPPRTPGGL
FCHCPPGFQGSICQ	0.91	AHT	0.02	0.19	-0.69	0.5	1523.96	FCHCPPGFQG
SPSPPCSPLPGAWTLTSSSLPAGE	2.02	AHT	-0.01	-0.15	-0.28	-1	2339.93	SPSPPCSPLP
GSTSPRVSSELEQARPQT	1.9	AHT	-0.34	-1.19	0.5	0	1930.31	GSTSPRVSSE
LGLQGLPGPPGEGENGDVG	1.01	AHT	-0.01	-0.5	0.13	-3	1763.2	LGLQGLPGPP
PSTTTTTKAPRPTPVPRAYLVP	1.19	AHT	-0.19	-0.59	-0.05	3	2352.03	PSTTTTTKAP
PTKTPTQIPIPPLPAV	1.39	AHT	0	-0.02	-0.34	1	1670.26	PTKTPTQIPI
LSPLPEELPLSPSGE	1.86	AHT	-0.04	-0.3	0.18	-3	1564.97	LSPLPEELPL
FQGLPGPPGPPGEAGKP	1.56	AHT	-0.04	-0.83	0.08	0	1603.06	FQGLPGPPGP
TLPWPSAQQDQSKLYHLPPPTVGP	2.27	AHT	-0.11	-0.79	-0.3	0.5	2658.37	TLPWPSAQQD
LPPPPVPPKSEAVR	1.72	AHT	-0.16	-0.59	0.29	1	1483.96	LPPPPVPPKS
EEGFESPTGTDCP	1.68	AHT	-0.18	-1.15	0.62	-4	1368.56	EEGFESPTGT
STDPFSEASNSSNT	1.02	AHT	-0.25	-1.17	0.29	-2	1443.57	STDPFSEASN
RCPVCGRGFGHR	1.23	AHT	-0.34	-0.62	0.21	3.5	1344.74	RCPVCGRGFG
LRPGQPGLPPFL	1.32	AHT	-0.02	-0.08	-0.39	1	1291.74	LRPGQPGLPP
VPQLYSFLRRP	1.18	AHT	-0.22	-0.29	-0.31	2	1375.79	VPQLYSFLRR
SQGSVPEPLN	1.44	AHT	-0.14	-0.77	0.07	-1	1027.24	SQGSVPEPLN
PALCLPPPPAPGPMGN	1.11	AHT	0.07	0.01	-0.42	0	1529.07	PALCLPPPPA
WTSPSWNGASERASS	0.91	AHT	-0.21	-1.09	-0.03	0	1622.86	WTSPSWNGAS
YGSSPGPGPAPSPGRPPAKPPE	1.41	AHT	-0.17	-1.27	0.3	1	2100.61	YGSSPGPGPA
HAHQHHPHSHPAQQPP	1.1	AHT	-0.28	-2.08	-0.19	3	1843.2	HAHQHHPHSH
SPVRRRRRSSASL	1.35	AHT	-0.66	-1.35	0.95	5	1527.91	SPVRRRRRSS
TSAPATLESSGCS	1.6	AHT	-0.07	-0.02	-0.03	-1	1210.44	TSAPATLESS
APAPSGLPPGPTGE	1.19	AHT	0.01	-0.49	0.01	-1	1247.56	APAPSGLPPG
LKKPPSAPDASAPALPNPPAL	1.05	AHT	-0.08	-0.34	0.09	1	2052.68	LKKPPSAPDA
EVEEEEKKIKQMFQL	1.22	AHT	-0.34	-1.27	1.03	-2	1908.43	EVEEEEKKIK
PGPLQPPPAGKTDITASPGQGLLLAP	0.93	AHT	0	-0.17	-0.18	0	2494.28	PGPLQPPPAG
QTKPSTAPASGSSLRHWNL	1.07	AHT	-0.21	-0.87	-0.09	2.5	2038.52	QTKPSTAPAS
PLTPGSPLVGPLAVSQNGPLMPPMTG	1.17	AHT	0.07	0.25	-0.5	0	2529.41	PLTPGSPLVG
CTHQKSVQTSASAKYCSVFP	1	AHT	-0.16	-0.29	-0.23	2.5	2172.73	CTHQKSVQTS
LPGNPGPPGQKGEPG	1.55	AHT	-0.14	-1.37	0.31	0	1401.77	LPGNPGPPGQ
SQASSLTTAEDLGSSCS	1.3	AHT	-0.13	-0.2	0.09	-2	1643.92	SQASSLTTAE
SSATTVTSKAAPSWPESHSST	1.52	AHT	-0.15	-0.64	-0.02	0.5	2119.5	SSATTVTSKA
EVSSSSPSPKEAHLPDVR	0.92	AHT	-0.27	-0.94	0.59	-0.5	1922.32	EVSSSSPSPK
TAKPARPQTRSPSPTLSYYSSGL	2.25	AHT	-0.25	-0.9	0.01	3	2466.06	TAKPARPQTR
KPENPPAETSAPKDIL	1.01	AHT	-0.23	-1.11	0.66	-1	1707.13	KPENPPAETS
SPEGPLSLSEGPSIGPEGGPGGA	1.27	AHT	0	-0.46	0.19	-3	2049.52	SPEGPLSLSE
PPVVPVKHRTGSWKCKEGPGPGP	2.04	AHT	-0.19	-0.93	0.24	3.5	2411.16	PPVVPVKHRT
KELHNSPHGPASEPSEKAKIL	1.06	AHT	-0.24	-1.14	0.56	1	2269.85	KELHNSPHGP
QGPGHRPKPQLREGISDPP	1.36	AHT	-0.35	-1.67	0.61	1.5	2066.59	QGPGHRPKPQ
TAMSSSSTPQPQGPPPTVSQML	1.58	AHT	-0.1	-0.52	-0.25	0	2229.82	TAMSSSSTPQ
LTSAPVPSTTTRSLTACP	1.45	AHT	-0.08	0.15	-0.29	1	1803.3	LTSAPVPSTT
SPSVAESPQGVTSVPTSMWSGQ	1.25	AHT	-0.06	-0.31	-0.24	-1	2219.72	SPSVAESPQG
SDLTRHHRIHTGEKPYECKE	1.02	AHT	-0.44	-1.75	0.76	1.5	2436.98	SDLTRHHRIH
LKEISSTSQTLLYT	1.29	AHT	-0.1	-0.06	-0.26	0	1584.01	LKEISSTSQT
PGPSGEKGETGDVGPM	0.94	AHT	-0.13	-1.04	0.57	-2	1514.86	PGPSGEKGET
SQPEGSLQSWLSC	1.48	AHT	-0.11	-0.5	-0.26	-1	1421.73	SQPEGSLQSW
GPRGPTGPPGAKGQE	1.1	AHT	-0.24	-1.51	0.55	1	1405.75	GPRGPTGPPG
DEKPPEEPGEARK	1.46	AHT	-0.54	-2.55	1.81	-2	1481.75	DEKPPEEPGE
ESAHDSPRDETLQ	1	AHT	-0.42	-1.81	0.97	-2.5	1484.67	ESAHDSPRDE
CRHTRRSSMSVEAETT	0.91	AHT	-0.45	-1.11	0.62	1.5	1851.25	CRHTRRSSMS
GITISCESPSSASR	0.93	AHT	-0.14	-0.1	0.14	0	1394.7	GITISCESPS
QDCHSHSRTSLQSS	1.19	AHT	-0.4	-1.41	0.26	1	1572.82	QDCHSHSRTS
ESAEGETDHSGYT	1.41	AHT	-0.25	-1.58	0.65	-3.5	1382.49	ESAEGETDHS
PAASVPTPAPSPGSLPQPSSIY	1.86	AHT	0	-0.15	-0.35	0	2121.67	PAASVPTPAP
PGIRGIPGLPGPPGTPGP	1.25	AHT	0.03	-0.33	-0.16	1	1637.19	PGIRGIPGLP
TSSGSPPGLAAVPVE	1.27	AHT	0.04	0.24	-0.15	-1	1368.71	TSSGSPPGLA
VSMKSPIFGPEEVSSVE	0.95	AHT	-0.04	0.04	0.18	-2	1822.3	VSMKSPIFGP
KYWSFSISPSHEY	1.26	AHT	-0.11	-0.89	-0.43	0.5	1630.95	KYWSFSISPS
AENSDASSTSTLNSSASQEE	1.04	AHT	-0.27	-1.11	0.53	-4	2015.2	AENSDASSTS
PPPPPVARPVPLPMPDSK	1.24	AHT	-0.13	-0.62	0.15	1	1892.53	PPPPPVARPV
VFVPPHPGISGGLG	1.32	AHT	0.19	0.65	-0.66	0.5	1333.77	VFVPPHPGIS
EPPAGAFPGFPSPPAP	1.09	AHT	0.06	-0.33	-0.2	-1	1535.92	EPPAGAFPGF
PHSPLPGHLGSSPLDSPRN	1.28	AHT	-0.18	-0.97	0.05	1	1965.43	PHSPLPGHLG
PPAETPAAVPPGEQ	1.27	AHT	-0.07	-0.71	0.2	-2	1360.67	PPAETPAAVP
PLVSHHPLGGDEPGQTQASQVLKDPSLS	0.91	AHT	-0.13	-0.62	0.06	-1	2895.61	PLVSHHPLGG
LEEHQKPPVSIKQERCDPESV	1.36	AHT	-0.35	-1.3	0.8	-1.5	2449.04	LEEHQKPPVS
SSTGPEEVALCSSR	1.51	AHT	-0.2	-0.36	0.36	-1	1422.71	SSTGPEEVAL
PTSGAPTGPGPTPTPP	0.92	AHT	-0.05	-0.89	-0.11	0	1431.78	PTSGAPTGPG
SPTKDQESDSEEPQASDPE	2.07	AHT	-0.44	-2.23	1.3	-6	2076.27	SPTKDQESDS
PKPTIWAEPGSVVPSGT	1.6	AHT	-0.01	-0.22	-0.17	0	1723.2	PKPTIWAEPG
RGGQVPNGLPRAPPAPV	1.44	AHT	-0.15	-0.55	0.04	2	1683.19	RGGQVPNGLP
SPSGEPAQPSNSSWPPSEN	1.57	AHT	-0.23	-1.57	0.24	-2	1955.23	SPSGEPAQPS
QKGRQGDPGIEGPIGFPGPKGVPG	1.19	AHT	-0.13	-0.9	0.33	1	2346.02	QKGRQGDPGI
PPPPPSGTPDAGLWSPSPGRRR	1	AHT	-0.27	-1.34	0.31	2	2282.84	PPPPPSGTPD
GSPASYHGSPEASLCPQHRTGPLWGQS	1.59	AHT	-0.14	-0.84	-0.18	1	2808.43	GSPASYHGSP
SPLSSGSAPTLPTGSGK	1.36	AHT	-0.07	-0.35	-0.02	1	1543.93	SPLSSGSAPT
PGPQGPPGPPGIPGAKGELGLP	1.52	AHT	0.01	-0.57	0.01	0	1990.63	PGPQGPPGPP
ALLPEPLKPQAALPVPPS	1.66	AHT	0.02	0.19	-0.21	0	1838.48	ALLPEPLKPQ
HPLAPGPPVSPFNSNKEEL	2.1	AHT	-0.12	-0.77	0.07	-0.5	2030.54	HPLAPGPPVS
PLVKVEESTVEEGTPDETE	0.95	AHT	-0.22	-0.97	0.88	-6	2088.48	PLVKVEESTV
GAPASLSPSSPAQ	1.16	AHT	-0.04	-0.21	-0.15	0	1169.42	GAPASLSPSS
GFGGLGGPGGFGGPGGFGPG	0.91	AHT	0.21	0.11	-0.47	0	1606.05	GFGGLGGPGG
GVPGVGVPGVGVPGVG	0.94	AHT	0.26	1.1	-0.56	0	1303.78	GVPGVGVPGV
RSEPPSATPSPALSVESL	1.9	AHT	-0.15	-0.4	0.22	-1	1825.24	RSEPPSATPS
PPPPGVQPFSVPLS	1.97	AHT	0.05	-0.01	-0.46	0	1418.85	PPPPGVQPFS
EPPEQTKAEFPKRET	1.53	AHT	-0.46	-2.09	1.16	-1	1787.16	EPPEQTKAEF
LSTLSPDAPSPGPAPSPPPPE	1.43	AHT	-0.07	-0.69	0.1	-2	2011.49	LSTLSPDAPS
RSHIGHKPYEY	1.07	AHT	-0.33	-1.75	0.17	2	1386.69	RSHIGHKPYE
HHPRPLPVL	0.97	AHT	-0.13	-0.43	-0.34	2	1065.42	HHPRPLPVL
MPEPGPRMNGFS	0.92	AHT	-0.17	-0.94	0.12	0	1319.68	MPEPGPRMNG
PVASQGGSLPAS	1.12	AHT	0.02	0.14	-0.27	0	1070.33	PVASQGGSLP
LGPGQAPEVAP	1.17	AHT	0.03	-0.09	-0.1	-1	1035.32	LGPGQAPEVA
YEAIPSPVLL	0.97	AHT	0.16	0.93	-0.64	-1	1101.45	YEAIPSPVLL
LVPESQLSPVEE	1.27	AHT	-0.09	-0.23	0.27	-3	1326.64	LVPESQLSPV
GFYGEVMSPLFP	1.71	AHT	0.16	0.49	-0.72	-1	1343.73	GFYGEVMSPL
LDIRNIDEQPKA	0.98	AHT	-0.34	-1.07	0.79	-1	1411.75	LDIRNIDEQP
MESHGLPGKV	1.69	AHT	-0.08	-0.39	0.12	0.5	1054.38	MESHGLPGKV
KRPHECGICKKA	1.06	AHT	-0.41	-1.13	0.85	3.5	1369.83	KRPHECGICK
KTPFVCTEC	1.13	AHT	-0.1	0.18	-0.09	0	1027.33	KTPFVCTEC
PSPLASHKVEILPEP	1.8	AHT	-0.06	-0.27	0.11	-0.5	1614.09	PSPLASHKVE
PSSGPSPGANPQLR	1.33	AHT	-0.22	-1.11	0.14	1	1364.67	PSSGPSPGAN
YGSPPVSPNDPVVPTESV	1.28	AHT	-0.05	-0.36	-0.09	-2	1841.25	YGSPPVSPND
GGGGGNFGGGGPPGL	0.93	AHT	0.13	-0.27	-0.27	0	1157.45	GGGGGNFGGG
LPLKGAGSSCPPSPSETN	1.73	AHT	-0.12	-0.56	0.11	0	1742.18	LPLKGAGSSC
YTLPPGVDPTLVPSSL	2.02	AHT	0.06	0.32	-0.49	-1	1656.14	YTLPPGVDPT
SEPKNPKLSAPSVED	1.16	AHT	-0.3	-1.28	0.82	-1	1597.94	SEPKNPKLSA
VSTITGYPTPGSR	1.42	AHT	-0.1	-0.37	-0.25	1	1335.66	VSTITGYPTP
PVTTTFPVSTTSLK	1.47	AHT	-0.03	0.2	-0.41	1	1478.9	PVTTTFPVST
SVTGPSSTATTER	1.55	AHT	-0.23	-0.71	0.25	0	1293.52	SVTGPSSTAT
QPSSGDLRVTQGPGEPESHLCP	1.75	AHT	-0.21	-0.98	0.29	-1.5	2291.8	QPSSGDLRVT
SSNPHTTLSPATPWSSAQEG	2.17	AHT	-0.14	-0.92	-0.15	-0.5	2055.42	SSNPHTTLSP
RYGTDPTPQHYPS	2.02	AHT	-0.32	-1.9	0.05	0.5	1518.78	RYGTDPTPQH
TSALGSSEDGIEPVSPPEGMVEPGH	1.15	AHT	-0.06	-0.49	0.28	-4.5	2480.02	TSALGSSEDG
QYSQEEASSSQAKITTGKSG	1.12	AHT	-0.28	-1.23	0.41	0	2087.47	QYSQEEASSS
AGKMEEHMKKEMQESQ	0.91	AHT	-0.41	-1.85	1.05	-0.5	1921.43	AGKMEEHMKK
LGPTAVTASPAQLSPSPAQSTSPA	1.51	AHT	-0.02	-0.03	-0.29	0	2236.79	LGPTAVTASP
TNFPIPGEPGIPLN	1.08	AHT	0.04	-0.2	-0.35	-1	1465.88	TNFPIPGEPG
TYGQSPKITTLMKQTHTQP	1.35	AHT	-0.22	-1.08	-0.15	2.5	2160.77	TYGQSPKITT
SSSNGTGGSSTAPLSSSTPSP	1.31	AHT	-0.12	-0.63	-0.03	0	1866.16	SSSNGTGGSS
PPPAPLMAQPPPLGAP	1.13	AHT	0.06	-0.11	-0.39	0	1551.1	PPPAPLMAQP
MYPPHPLTAQYGVKVLRS	1.21	AHT	-0.1	-0.26	-0.41	2.5	2057.71	MYPPHPLTAQ
EPLGAMAASEDEEE	0.97	AHT	-0.17	-0.91	0.98	-6	1477.7	EPLGAMAASE
LLSQSSWHPLSPE	1.72	AHT	-0.07	-0.47	-0.38	-0.5	1480.83	LLSQSSWHPL
QPLAEPPMSGLPEF	1.54	AHT	-0.01	-0.29	-0.1	-2	1512.94	QPLAEPPMSG
PTPESTPVLHQKT	2.27	AHT	-0.21	-1.06	0.12	0.5	1434.8	PTPESTPVLH
GPGPREPTGLGPFL	1.2	AHT	-0.04	-0.45	-0.04	0	1394.8	GPGPREPTGL
LIITTRYPPPSGSP	1.33	AHT	-0.05	-0.2	-0.35	1	1498.94	LIITTRYPPP
NGPTGPPGPPGPRGNAGEP	1.09	AHT	-0.16	-1.45	0.29	0	1726.11	NGPTGPPGPP
KDVLKPGEDTPSCIPVTSPPIK	1.04	AHT	-0.15	-0.45	0.38	0	2322.03	KDVLKPGEDT
PSANPPPPQAHRRLRRSHS	1.26	AHT	-0.49	-1.81	0.5	5	2161.67	PSANPPPPQA
HCTVTSMSPVGPTKW	1.2	AHT	-0.05	-0.17	-0.45	1.5	1631.11	HCTVTSMSPV
YPLHSSVTLEEQN	1.51	AHT	-0.16	-0.82	-0.1	-1.5	1516.82	YPLHSSVTLE
DTGALEGPGDPGPPSLQ	0.94	AHT	-0.09	-0.83	0.29	-3	1607.94	DTGALEGPGD
PAPPVSMNPVGTLPPRPIP	1.39	AHT	-0.02	-0.12	-0.28	1	1937.6	PAPPVSMNPV
SYSPTQRSPGCRPLPSA	2	AHT	-0.28	-0.96	0.08	2	1804.23	SYSPTQRSPG
LGTAQGHYLYIESSEPQ	1.1	AHT	-0.08	-0.62	-0.26	-1.5	1893.3	LGTAQGHYLY
AGKNEEPSSHHIPHGKE	1.51	AHT	-0.31	-1.81	0.71	0.5	1854.22	AGKNEEPSSH
LFNSSRLHLPRPSA	1.15	AHT	-0.22	-0.38	-0.13	2.5	1595.03	LFNSSRLHLP
QFSLYTSPSLPNL	2.02	AHT	-0.02	-0.03	-0.72	0	1466.84	QFSLYTSPSL
AVPASTTVLLQPLVQPPP	1.77	AHT	0.08	0.58	-0.61	0	1828.45	AVPASTTVLL
LPASDLLPGGPSSPLANS	1.18	AHT	0.01	0.08	-0.21	-1	1693.14	LPASDLLPGG
DSAGPRPHSPQLRSRTR	1.04	AHT	-0.53	-1.82	0.76	3.5	1918.33	DSAGPRPHSP
LSPPALPPPAPSPP	1.04	AHT	0.03	-0.23	-0.29	0	1337.76	LSPPALPPPA
RAPRKQATPSRVIPAKPKPKPKSSSQ	1.07	AHT	-0.45	-1.52	0.78	8	2841.71	RAPRKQATPS
PSPAPSAQAPGSSSPTHMQ	1.27	AHT	-0.13	-0.84	-0.09	0.5	1835.23	PSPAPSAQAP
HTPGPPGPQFL	1.37	AHT	-0.01	-0.73	-0.45	0.5	1147.46	HTPGPPGPQF
DGLPGRAGPVGEPGRPGQGGL	0.94	AHT	-0.13	-0.74	0.31	0	1944.46	DGLPGRAGPV
LPGLQGPPGFSGPKGPPGP	1.5	AHT	0	-0.6	-0.14	1	1757.31	LPGLQGPPGF
PSGPPGKDGASGHPGPIGPP	1.17	AHT	-0.06	-0.98	0.19	0.5	1779.23	PSGPPGKDGA
PGKPGPKGDPGPEGVGRPGKP	1.47	AHT	-0.25	-1.57	0.79	2	1981.55	PGKPGPKGDP
GPSSACKPSRSTTGAPS	1.21	AHT	-0.23	-0.78	0.28	2	1590.94	GPSSACKPSR
RGPGLSLPPPIGGAGPPLGL	1.22	AHT	0.08	0.21	-0.31	1	1823.48	RGPGLSLPPP
QGLEKPKSLPFTTEEKY	1.6	AHT	-0.28	-1.32	0.55	0	1995.51	QGLEKPKSLP
QGSPTTSPTPSADRLKPPA	1.46	AHT	-0.25	-1.1	0.32	1	1908.35	QGSPTTSPTP
PLAKTAPKSGPSLPVSVQ	1.42	AHT	-0.07	-0.09	-0.05	2	1777.35	PLAKTAPKSG
VQPQQGYIPPMAQPGLPPVPGAPGMPPG	1.73	AHT	0.03	-0.33	-0.42	0	2779.7	VQPQQGYIPP
DPKEPLGSQRAASPTPKQPS	1.62	AHT	-0.34	-1.52	0.66	1	2091.58	DPKEPLGSQR
EKPHECSECGKLSHLTSLHTTHLGEKPYE	1.47	AHT	-0.24	-1.09	0.35	0	3292.1	EKPHECSECG
LSGPGGAGSPQVILVSPPAQPS	1.22	AHT	0.06	0.2	-0.35	0	2016.61	LSGPGGAGSP
ALGSLPVHGAQLQPSSTSGQSGQT	0.94	AHT	-0.07	-0.34	-0.29	0.5	2308.86	ALGSLPVHGA
PTELSLEELSISARPPGPPALAPPTAT	1.11	AHT	-0.05	-0.16	0.03	-2	2713.46	PTELSLEELS
RRALVGPGSPPPPPPPPPLPA	1.26	AHT	-0.1	-0.61	0.01	2	2067.75	RRALVGPGSP
PGYQPTYNPTLPYHNPIPGG	1.97	AHT	-0.07	-1.07	-0.56	0.5	2183.71	PGYQPTYNPT
RLPPPLLSPVPSPPLASPPHL	1.59	AHT	-0.01	0.02	-0.36	1.5	2182.94	RLPPPLLSPV
SVVEGAPPNLPQPRSPEHHLIPGQP	2.03	AHT	-0.14	-0.79	0.01	0	2654.36	SVVEGAPPNL
LSTFAQPPPAQPPAPPASQLSGSQTGVSS	1.9	AHT	-0.06	-0.36	-0.27	0	2806.49	LSTFAQPPPA
EPSGKKAPTQPIQPAPGPA	1.58	AHT	-0.17	-1.07	0.32	1	1871.39	EPSGKKAPTQ
RLGYETYLSSGGHGSTSPTTLDWGQPAGW	0.96	AHT	-0.09	-0.72	-0.31	-0.5	3082.73	RLGYETYLSS
STVTSVTTASTSTDSAPKPSFSFGV	1.13	AHT	-0.05	0.04	-0.19	0	2462.98	STVTSVTTAS
QGTPSAGSQPGAQSGTSPGQPPA	1.22	AHT	-0.13	-1.01	-0.01	0	2065.47	QGTPSAGSQP
SRTSGSPSEGLGRTGSTAGL	1	AHT	-0.2	-0.64	0.26	1	1878.27	SRTSGSPSEG
GIPGPMGPPGAIGFPGPKGEGGVVGP	1.3	AHT	0.12	0.05	-0.19	0	2300.08	GIPGPMGPPG
LTPPFNPNVAGPA	1.4	AHT	0.05	-0.01	-0.52	0	1294.65	LTPPFNPNVA
RGPPGPPGPRGIGTPGPKRDHGGKG	1.07	AHT	-0.28	-1.56	0.61	4.5	2403.08	RGPPGPPGPR
PYYTHLGSGPTVASIRE	1.26	AHT	-0.08	-0.38	-0.29	0.5	1848.29	PYYTHLGSGP
PPSPCPGSHERPQHPPVPARKAQRRL	1.63	AHT	-0.39	-1.52	0.49	5	2896.69	PPSPCPGSHE
PTGLPSVVNMSPLPPTFNVA	1.45	AHT	0.07	0.42	-0.61	0	2038.68	PTGLPSVVNM
TSSTKSSPTPMTLSITSGMPNDFSEMP	0.94	AHT	-0.12	-0.5	-0.03	-1	2832.54	TSSTKSSPTP
RPVGPGVLSVNRPVGSGVLP	0.99	AHT	-0.03	0.33	-0.21	2	1957.61	RPVGPGVLSV
KPGGGLKLLNGTPLFGPPGPP	1.23	AHT	0.01	-0.29	-0.19	2	2014.73	KPGGGLKLLN
LEPEPARPPLSALAPPHSSPDP	1.46	AHT	-0.14	-0.75	0.25	-1.5	2275.84	LEPEPARPPL
PGPAGLPGPPGERGGPGSRGFPGAD	0.93	AHT	-0.1	-0.86	0.28	0	2257.81	PGPAGLPGPP
PGSPLGTETAVSPGGP	1.52	AHT	0.01	-0.29	-0.06	-1	1423.77	PGSPLGTETA
PPGPGTGPGAGGAG	1.02	AHT	0.08	-0.45	-0.1	0	1049.31	PPGPGTGPGA
QCVEHSTHPDCALS	0.9	AHT	-0.16	-0.43	-0.03	-1	1526.85	QCVEHSTHPD
VLTQPAVSSPSTEA	1.36	AHT	-0.03	0.13	-0.18	-1	1386.71	VLTQPAVSSP
SASPPGPQFQESSP	1.81	AHT	-0.16	-1.14	0.11	-1	1415.66	SASPPGPQFQ
EGMQLALTEESSSSDSMWL	0.91	AHT	-0.1	-0.34	0.07	-4	2101.56	EGMQLALTEE
GSKGQPVGMA	1.17	AHT	-0.06	-0.31	0.02	1	931.22	GSKGQPVGMA
SASSLGSGAPGP	1.16	AHT	0.03	-0.02	-0.13	0	987.19	SASSLGSGAP
SWPAAGLGPGHA	1.56	AHT	0.11	-0.01	-0.57	0.5	1120.4	SWPAAGLGPG
HPVGAAYGGSPQ	1.09	AHT	0	-0.45	-0.4	0.5	1140.39	HPVGAAYGGS
SGHMTPGMKL	1.3	AHT	-0.06	-0.34	-0.2	1.5	1058.43	SGHMTPGMKL
EEAPGGPPSLS	1.22	AHT	-0.08	-0.78	0.39	-2	1040.24	EEAPGGPPSL
LYIPVNGYQ	1.55	AHT	0.07	0.1	-1.03	0	1066.36	LYIPVNGYQ
SHSHSPMSTRRRH	1.13	AHT	-0.58	-2.05	0.54	4.5	1575.9	SHSHSPMSTR
LPKEPAPPSLESQPP	1.99	AHT	-0.18	-1.08	0.38	-1	1587.01	LPKEPAPPSL
HLQPSSSSGLGTSPGS	1.18	AHT	-0.09	-0.56	-0.16	0.5	1498.8	HLQPSSSSGL
GKVLVSDAYLQRPLPPPSPPAPPPPA	2.01	AHT	-0.07	-0.37	-0.09	1	2662.49	GKVLVSDAYL
QAPEDEVTSSLGDASPEPPNL	1.28	AHT	-0.17	-0.9	0.47	-5	2153.53	QAPEDEVTSS
GFPRPSVVPPASH	1.51	AHT	-0.07	-0.24	-0.22	1.5	1347.71	GFPRPSVVPP
LPYVPCSPSPCQNGGTCRPTGDTT	1.71	AHT	-0.15	-0.6	-0.13	0	2452.06	LPYVPCSPSP
FPRQKAPPASFRQSLAPRSQTPVRS	1.17	AHT	-0.35	-1.01	0.26	5	2810.55	FPRQKAPPAS
PAQPGMPPVSSTQLQIDTT	1.19	AHT	-0.09	-0.44	-0.21	-1	1968.49	PAQPGMPPVS
STAQEYLHTHPSGRDTGT	1.37	AHT	-0.27	-1.33	0.14	0	1958.29	STAQEYLHTH
EFPEYGTMEASGE	1.11	AHT	-0.12	-0.98	0.41	-4	1446.68	EFPEYGTMEA
PGPVGPQGYTGPPGL	1.84	AHT	0.04	-0.5	-0.39	0	1393.79	PGPVGPQGYT
VCTAGNTNYQYTTPLPLSAPHT	1.28	AHT	-0.06	-0.36	-0.6	0.5	2349.92	VCTAGNTNYQ
PPGPPGSAGVPGVPGLKGDKGDT	1.15	AHT	-0.07	-0.64	0.29	0	2057.63	PPGPPGSAGV
EEAEPGRGGLGVGEP	1.01	AHT	-0.15	-0.93	0.75	-3	1453.75	EEAEPGRGGL
PFPGPLLGSPTGSFPTGP	1.51	AHT	0.09	-0.06	-0.49	0	1726.22	PFPGPLLGSP
LQPQGHVSTEHTP	2.14	AHT	-0.18	-1.13	-0.11	0	1430.74	LQPQGHVSTE
RPQPRTEMEAPSRRQKRHPEEPGQ	1.01	AHT	-0.62	-2.51	1.18	2.5	2898.55	RPQPRTEMEA
PSPEPTPEDNLEAEPEAPA	1.11	AHT	-0.21	-1.39	0.78	-6	1990.31	PSPEPTPEDN
HVQCGEHYSETHTSQDSIFHGNEEAL	1.11	AHT	-0.19	-1.04	0.09	-3	2956.46	HVQCGEHYSE
HCQKICEPLGGYHPWPY	1.63	AHT	-0.08	-0.77	-0.49	1	2028.59	HCQKICEPLG
WSSPPQCVGLPCGLPPYIQ	1.97	AHT	0.05	0.09	-0.72	0	2042.68	WSSPPQCVGL
LPGLPGEKGHTGPTGPPGIGLP	1.28	AHT	0.02	-0.39	-0.11	0.5	2049.71	LPGLPGEKGH
EPGVSGPMGPRGPPGPPGKPGD	1.28	AHT	-0.14	-1.17	0.43	0	2040.6	EPGVSGPMGP
THRQRESVHGDSGSGTSHR	1.18	AHT	-0.47	-1.85	0.66	2.5	2091.42	THRQRESVHG
PRGGTLLSVTGEVEPSSRGYLGPPHQGPP	1.78	AHT	-0.13	-0.69	0.04	0.5	2943.71	PRGGTLLSVT
LSFFGPYPEVSPANGLNRLPTPSPEPPP	2.18	AHT	-0.07	-0.54	-0.17	-1	2978.75	LSFFGPYPEV
SPGHGLPSPLTPPNP	1.71	AHT	-0.05	-0.79	-0.25	0.5	1467.86	SPGHGLPSPL
TSAEKPIIPAEPPE	1.25	AHT	-0.12	-0.69	0.52	-2	1478.85	TSAEKPIIPA
EISGIDPPYEAMPEQPVP	1.51	AHT	-0.07	-0.62	0.18	-4	1969.45	EISGIDPPYE
LDYLLPGSGPAHSPLPSK	1.23	AHT	-0.03	-0.25	-0.2	0.5	1849.38	LDYLLPGSGP
LSSCSSQSLQLTSCL	1.05	AHT	-0.06	0.51	-0.49	0	1556.98	LSSCSSQSLQ
YYWTPGYGEACSPSSNAGFSLAPVGQ	0.99	AHT	0.01	-0.27	-0.55	-1	2710.29	YYWTPGYGEA
PIKPTCGGGGEPEP	1.47	AHT	-0.1	-0.9	0.41	-1	1338.7	PIKPTCGGGG
RPSLQPVSDEWSAESQQ	1.42	AHT	-0.31	-1.35	0.39	-2	1944.28	RPSLQPVSDE
PQSDMDSGSSEEF	1.08	AHT	-0.27	-1.38	0.74	-4	1415.57	PQSDMDSGSS
PGAEPLSPQPLPS	1.92	AHT	-0.05	-0.58	-0.02	-1	1289.63	PGAEPLSPQP
RGPGAQDWKNEVPSPPLPEG	1.44	AHT	-0.23	-1.35	0.42	-1	2131.62	RGPGAQDWKN
QPQAWPGRQSQEGAGLPSHH	1	AHT	-0.24	-1.48	0.01	1	2168.62	QPQAWPGRQS
PDPSSPGVSAAVPAPP	1.05	AHT	0	-0.13	-0.04	-1	1445.79	PDPSSPGVSA
WPALYPPGRSSLHHAQ	1.54	AHT	-0.12	-0.76	-0.47	2	1817.27	WPALYPPGRS
RGGAGPPGPEGGKGAAGPPGP	1.04	AHT	-0.08	-0.94	0.36	1	1741.2	RGGAGPPGPE
GPGILEEEEELGGGSPGR	1.11	AHT	-0.14	-0.91	0.72	-4	1783.16	GPGILEEEEE
DTGAKGEPGPTGIQGPP	0.94	AHT	-0.12	-1.05	0.36	-1	1578.95	DTGAKGEPGP
LPGSPGHMGPPGPIGPKGISGHP	1.08	AHT	0.02	-0.49	-0.18	2	2144.84	LPGSPGHMGP
RGSQGPPGLPGPPGPL	1.48	AHT	-0.08	-0.8	-0.01	1	1483.93	RGSQGPPGLP
SGSDLLGPTLSEARPEAPPPPSGS	1.51	AHT	-0.13	-0.65	0.28	-2	2319.84	SGSDLLGPTL
PGMPGTRGLPGPSGDPGKPGLTGPQG	0.97	AHT	-0.1	-0.88	0.15	1	2386.08	PGMPGTRGLP
AQPTSPPALPRGGPRAPPGPGHP	1.18	AHT	-0.16	-1.04	0.1	2.5	2212.82	AQPTSPPALP
VEPGKGPPPTTEDEAPGPPGE	1.5	AHT	-0.18	-1.41	0.72	-4	2058.48	VEPGKGPPPT
QPQGAAPAPPGAPQGPPGAAPGPP	1.04	AHT	-0.02	-0.74	-0.1	0	2085.64	QPQGAAPAPP
LGLPVPPITALITPGPVRH	0.99	AHT	0.1	0.67	-0.57	1.5	1948.68	LGLPVPPITA
HHSQEALQAEAASPPRTSGRLSSLFPF	1.03	AHT	-0.17	-0.56	0	1	2922.59	HHSQEALQAE
DGPPGPPGERGPQ	1.28	AHT	-0.27	-1.89	0.71	-1	1260.51	DGPPGPPGER
TSGSKQAQKLVPPPGKARTPGQH	1.22	AHT	-0.29	-1.26	0.33	4.5	2371.04	TSGSKQAQKL
VQLTSDPPGLTEPWSSHSSDLLPELPHA	1.75	AHT	-0.08	-0.49	-0.09	-3	3011.71	VQLTSDPPGL
PGVDPSPEGHMTPDHFIQGH	1.15	AHT	-0.1	-0.96	0.02	-1.5	2155.63	PGVDPSPEGH
PPGPNGPPGPPGPPGPQGPPGL	1.12	AHT	-0.02	-1.15	-0.06	0	1938.5	PPGPNGPPGP
QGPPGPHGLPGIGKPGGPGLPG	1.41	AHT	0.03	-0.6	-0.12	1.5	1944.58	QGPPGPHGLP
SGGMAAAAKEPSWVDWDEEEEEEEEE	1.28	AHT	-0.25	-1.48	1.08	-11	2940.32	SGGMAAAAKE
QGPPGKMGPQGTPGIPGIPGPIGQKGD	1.07	AHT	-0.07	-0.81	0.09	1	2539.34	QGPPGKMGPQ
WMEPLPGFPGGAGGGGGGGGSGGGPGPGP	1.09	AHT	0.11	-0.38	-0.21	-1	2379.02	WMEPLPGFPG
ASAPVSVQLLTPAASPPELEPGLEAGPG	1.18	AHT	0.04	0.17	-0.11	-3	2656.39	ASAPVSVQLL
RAYLCRVRPPHPASSSVCASPSPPPH	1.48	AHT	-0.21	-0.53	-0.04	4	2770.52	RAYLCRVRPP
RFLPLVFCAHEPSPPGSTDEISG	0.97	AHT	-0.05	-0.1	-0.06	-1.5	2457.08	RFLPLVFCAH
SQELHQPKDCGKSEVETSTELK	1.53	AHT	-0.35	-1.4	0.81	-1.5	2474.02	SQELHQPKDC
PEEAPDSESAEPPQVPGAETS	1.64	AHT	-0.21	-1.26	0.75	-6	2124.43	PEEAPDSESA
AAALGSPVSSSPTPPPLPATHSFTRS	1.57	AHT	-0.05	-0.11	-0.25	1.5	2534.17	AAALGSPVSS
NPPMAEHSSPYSE	1.31	AHT	-0.21	-1.42	0.19	-1.5	1445.69	NPPMAEHSSP
LSVLGTAGEGPPSEVT	0.98	AHT	0.04	0.21	-0.08	-2	1513.9	LSVLGTAGEG
TGQQQAGVVAQPPAVPPRPQPSQA	1.3	AHT	-0.16	-0.73	-0.1	1	2410.04	TGQQQAGVVA
SQTHDLLSTTSGQISQE	1.71	AHT	-0.2	-0.84	0.04	-1.5	1832.17	SQTHDLLSTT
SVSPELGSSSPAVTSL	1.25	AHT	0	0.33	-0.17	-1	1517.87	SVSPELGSSS
APPCSPSTSLSSTS	1.62	AHT	-0.09	-0.21	-0.16	0	1321.59	APPCSPSTSL
PAPLPGLQDGEVEGHPVW	1.53	AHT	0	-0.44	-0.1	-2.5	1898.38	PAPLPGLQDG
QARTLTLQPPRSPPPAPPPPP	1.29	AHT	-0.22	-1.1	0.06	2	2215.87	QARTLTLQPP
TASSSSVPAPSPGVPRRS	1.12	AHT	-0.21	-0.52	0.19	2	1740.13	TASSSSVPAP
RRLPRPGSARPAPPRV	0.99	AHT	-0.48	-1.26	0.69	5	1783.32	RRLPRPGSAR
GGRPSPPTKMVPL	1.1	AHT	-0.15	-0.55	0.1	2	1336.8	GGRPSPPTKM
RVLEALGPEPSEPQGVCE	1.2	AHT	-0.15	-0.45	0.41	-3	1910.39	RVLEALGPEP
FGTKDVTTPGHSTPVPE	1.43	AHT	-0.12	-0.71	0.1	-0.5	1770.17	FGTKDVTTPG
SDLSDIMEEDEEELYSEMQLEDGG	1.41	AHT	-0.23	-1.12	0.92	-11	2764.2	SDLSDIMEED
EELALLAAGERPSEPGEHPQAEPGPPAE	0.99	AHT	-0.16	-0.96	0.57	-5.5	2879.49	EELALLAAGE
GEAANPKPLGVSEEKDQEP	1.2	AHT	-0.28	-1.43	0.92	-3	1995.4	GEAANPKPLG
GPAKLSPCCHSPAPKPPPA	1.39	AHT	-0.11	-0.53	0.04	2.5	1855.45	GPAKLSPCCH
RPRRAALRVLSSL	1.21	AHT	-0.38	-0.15	0.36	4	1494.98	RPRRAALRVL
NTPTHSIAASISQPQ	0.97	AHT	-0.12	-0.54	-0.29	0.5	1551.89	NTPTHSIAAS
EVPSSSPSPVLQREAPTPSSE	1.97	AHT	-0.22	-0.86	0.4	-2	2181.62	EVPSSSPSPV
KGPKVTVKVYFD	1.35	AHT	-0.16	-0.32	0.19	2	1380.82	KGPKVTVKVY
LLNPEVNPD	0.97	AHT	-0.13	-0.6	0.14	-2	1010.24	LLNPEVNPD
WAGQPPSSPVV	1.5	AHT	0.04	-0.09	-0.55	0	1124.41	WAGQPPSSPV
PVPPPVPAGSRE	1.41	AHT	-0.12	-0.58	0.23	0	1202.53	PVPPPVPAGS
DGEDKGIPAAP	1.18	AHT	-0.16	-0.94	0.84	-2	1069.28	DGEDKGIPAA
FVEPPCTGST	1.95	AHT	0	0.02	-0.25	-1	1037.28	FVEPPCTGST
PAPGLPGAGGPVVPGPG	1.55	AHT	0.16	0.22	-0.34	0	1396.86	PAPGLPGAGG
PDTQGVSGPSPPQG	1.73	AHT	-0.15	-1.16	0.15	-1	1323.58	PDTQGVSGPS
VTQSHWPSEPSEAV	1.69	AHT	-0.12	-0.76	-0.05	-1.5	1553.84	VTQSHWPSEP
LTPSGPEPGAPAEGADKPEL	0.91	AHT	-0.11	-0.78	0.49	-3	1933.38	LTPSGPEPGA
EPGSPGPIGSLGHPGPQGVVGPPG	1.73	AHT	0.04	-0.4	-0.14	-0.5	2147.75	EPGSPGPIGS
PPGPSGGPSAVSQVVS	1.16	AHT	0.02	0.01	-0.23	0	1422.78	PPGPSGGPSA
PRGCPEILSHSVGMSESPVGPK	0.91	AHT	-0.12	-0.38	0.17	0.5	2264.92	PRGCPEILSH
TGSPASSATPVPALSTQLTTQVTASSSGH	1.62	AHT	-0.05	-0.08	-0.31	0.5	2742.36	TGSPASSATP
QYSGDIRQLPRAEYKPEKLPSHS	1.06	AHT	-0.36	-1.47	0.49	1.5	2700.34	QYSGDIRQLP
SHSLSEFSHGQSPRSPIS	1.17	AHT	-0.21	-0.89	0.07	1	1940.31	SHSLSEFSHG
SSTPSRKGQGPNSGEPAPVLSSPPP	1.77	AHT	-0.21	-1.08	0.28	1	2431.99	SSTPSRKGQG
PGPGLSSTSLVGEPSAGLGLGPE	1.23	AHT	0.05	0.07	-0.1	-2	2079.64	PGPGLSSTSL
TTHTPSQQGAQETRNTTKPKPESQF	1.76	AHT	-0.39	-1.86	0.43	1.5	2800.36	TTHTPSQQGA
SPSLQSSTAALTGGPTTGQTVAR	1.05	AHT	-0.1	-0.23	-0.17	1	2188.71	SPSLQSSTAA
PDEALTSPPDWELPLSESLSDWD	1.38	AHT	-0.14	-0.85	0.32	-7	2600.06	PDEALTSPPD
YSQDSAYSSSTTSTSFKPRRS	1.33	AHT	-0.37	-1.33	0.28	2	2343.71	YSQDSAYSSS
PGPSGIAVPGKPGPQGVPGPP	1.78	AHT	0.02	-0.41	-0.09	1	1863.46	PGPSGIAVPG
GPPGNPGLPGLPGNRGPMGPVGFGP	1.31	AHT	0.01	-0.46	-0.22	1	2297.02	GPPGNPGLPG
STGKDSYAPEPLPPGVSGFL	1.46	AHT	-0.04	-0.33	-0.04	-1	2019.52	STGKDSYAPE
PGLPGLRGLPGERGTPGLPGPK	1.2	AHT	-0.12	-0.65	0.2	2	2123.83	PGLPGLRGLP
TVPIPPRAVPASTTVLLQPLVQPP	1.57	AHT	0.02	0.45	-0.49	1	2492.36	TVPIPPRAVP
TQGIHSATPISTQGLQPAP	0.99	AHT	-0.05	-0.35	-0.36	0.5	1904.4	TQGIHSATPI
VSGCERLQGPPTPAGKETEGSL	1.09	AHT	-0.18	-0.71	0.38	-1	2213.77	VSGCERLQGP
EFFSSQQPPNAGVGQPPPPLPVIAL	1.98	AHT	0.02	-0.06	-0.4	-1	2588.33	EFFSSQQPPN
NQQQELSHCPPPPEPRIMTSCK	1.47	AHT	-0.3	-1.26	0.25	0.5	2521.2	NQQQELSHCP
THQNTEKSDALPSSGQ	1.22	AHT	-0.32	-1.55	0.43	-0.5	1699.98	THQNTEKSDA
VCFFGYPPFKYSHP	1.75	AHT	0.05	-0.04	-0.84	1.5	1689.15	VCFFGYPPFK
GPPGPPGMQGPPGPA	1.1	AHT	0.01	-0.87	-0.11	0	1313.71	GPPGPPGMQG
ASLGLTPSPVPGSEGRPERSPL	1.64	AHT	-0.16	-0.53	0.25	0	2204.78	ASLGLTPSPV
QPPDVTQDQGFSHELEFRS	1.31	AHT	-0.28	-1.29	0.37	-2.5	2217.61	QPPDVTQDQG
LPPGGSGPGPGPGAGKPP	1.31	AHT	0	-0.73	0.06	1	1496.95	LPPGGSGPGP
PHLPPSPPFVEAPSEARPAAKVDS	1.29	AHT	-0.14	-0.56	0.25	-0.5	2497.12	PHLPPSPPFV
PPPAEGTSTSGSL	1.91	AHT	-0.07	-0.56	0.06	-1	1200.44	PPPAEGTSTS
PAGPIGPVGARGPAGPQG	0.91	AHT	0.01	-0.24	-0.09	1	1556.02	PAGPIGPVGA
CRHGAGGEPQAPPAAPPLESP	0.91	AHT	-0.13	-0.78	0.2	-0.5	2039.54	CRHGAGGEPQ
EPVSPTPKPLPVPVP	1.63	AHT	-0.03	-0.25	-0.03	0	1554.07	EPVSPTPKPL
GLGSSGSLSQKTPPSSNSCTASS	1.13	AHT	-0.15	-0.52	0.01	1	2140.58	GLGSSGSLSQ
PGKAPPVLAPPPGV	1.82	AHT	0.06	0.11	-0.2	1	1296.77	PGKAPPVLAP
PEGPAPPAPHARL	0.9	AHT	-0.13	-0.8	0.17	0.5	1309.66	PEGPAPPAPH
DDKKAGPLGGSSYEEEEDEEGG	1.14	AHT	-0.32	-1.83	1.32	-7	2298.58	DDKKAGPLGG
GSTSGSLFGPSSFTAAPTGT	0.97	AHT	0.04	0.07	-0.4	0	1830.21	GSTSGSLFGP
LPSAPTRVTATPLSSSAVLV	1.01	AHT	0.02	0.74	-0.42	1	1967.57	LPSAPTRVTA
EEPDGAIGESSLITT	1.07	AHT	-0.06	-0.32	0.39	-4	1518.81	EEPDGAIGES
APLSNTPLSPAKNSFSGQT	1.37	AHT	-0.12	-0.54	-0.16	1	1917.37	APLSNTPLSP
TQPLVHICLPLHLPPPIG	1.07	AHT	0.13	0.66	-0.81	1	1945.69	TQPLVHICLP
PPAPAPLEKPIVLMK	1.24	AHT	-0.01	0.17	-0.01	1	1601.24	PPAPAPLEKP
AQPKLPNSSEHVAAPSFSNQS	0.99	AHT	-0.18	-0.82	0.02	0.5	2196.65	AQPKLPNSSE
GFPPLPPPPPQLPT	1.17	AHT	0.03	-0.5	-0.45	0	1454.93	GFPPLPPPPP
LPRESPASSPGSGNSLPLGA	1.22	AHT	-0.1	-0.41	0.06	0	1894.35	LPRESPASSP
SSPGPGLPEVTTDACP	1.49	AHT	-0.05	-0.31	0.06	-2	1527.88	SSPGPGLPEV
RPATSTVTGLGISSRTPAVSTSESSA	1.16	AHT	-0.14	-0.13	0.04	1	2521.09	RPATSTVTGL
EGPPTQVSPSGSELGEGSQPDWAGGS	1.52	AHT	-0.12	-0.98	0.24	-4	2513.95	EGPPTQVSPS
QVPPGLAPPLQFHPQG	1.79	AHT	0	-0.38	-0.5	0.5	1683.19	QVPPGLAPPL
TLKEVDSSPEVPPPTTATS	1.62	AHT	-0.16	-0.63	0.32	-2	1956.39	TLKEVDSSPE
LQMPPTPPSSHGSDSDGSQ	1.06	AHT	-0.2	-1.23	0.21	-1.5	1925.28	LQMPPTPPSS
PGAPESTLPHGLPPCAP	1.44	AHT	0	-0.29	-0.19	-0.5	1641.11	PGAPESTLPH
PASPAPASTEPPALSPSL	1.45	AHT	-0.01	-0.12	-0.1	-1	1690.11	PASPAPASTE
AGSKAQTSTTTPEPPS	1.88	AHT	-0.22	-1.11	0.28	0	1559.86	AGSKAQTSTT
RSHVGPTEGPPDPLGGQGRPLRP	1.29	AHT	-0.27	-1.24	0.41	1.5	2377.99	RSHVGPTEGP
PPPREHGPPPGEDTGP	1.12	AHT	-0.27	-1.96	0.69	-1.5	1636.96	PPPREHGPPP
AGKETEGSLSDSDFKEP	1.04	AHT	-0.28	-1.32	0.98	-3	1797.09	AGKETEGSLS
SATLPPRTGNSTYLNE	1.2	AHT	-0.21	-0.89	-0.04	0	1721.08	SATLPPRTGN
AGQRTTTPPPSQIPDPPFSSP	1.5	AHT	-0.19	-1.05	0.06	0	2178.67	AGQRTTTPPP
PSLVEYQESTEIQVK	1.11	AHT	-0.18	-0.66	0.25	-2	1750.16	PSLVEYQEST
PGPMGLTGRPGPVGGPG	1.21	AHT	0.01	-0.36	-0.12	1	1504	PGPMGLTGRP
DGDGPLSDGGHEEPT	1	AHT	-0.21	-1.55	0.84	-4.5	1482.65	DGDGPLSDGG
AGLPLDPEYSVPCYR	1.17	AHT	-0.1	-0.27	-0.13	-1	1680.11	AGLPLDPEYS
PGERGLGGPAPPEPDS	1.15	AHT	-0.18	-1.24	0.62	-2	1532.85	PGERGLGGPA
PLRLLPAPGGPAELPVAH	1.04	AHT	0.03	0.27	-0.26	0.5	1805.42	PLRLLPAPGG
AAVSTPPPPPVGTLLPAPS	1.69	AHT	0.09	0.36	-0.44	0	1769.33	AAVSTPPPPP
SGPAGVRNSSSKTQVSPLNPPPSP	1.54	AHT	-0.2	-0.87	0.11	2	2361.93	SGPAGVRNSS
RTSPPVSVRDAYGTSSLSS	1.12	AHT	-0.22	-0.51	0.13	1	1967.37	RTSPPVSVRD
GGIPGPAGPIGPPGPPGLPGPQ	1.35	AHT	0.1	-0.3	-0.26	0	1887.51	GGIPGPAGPI
TTSYTPSSTPHPSA	2.07	AHT	-0.15	-0.96	-0.26	0.5	1433.67	TTSYTPSSTP
HGPENTLPMPDSSEGKS	0.98	AHT	-0.24	-1.42	0.54	-1.5	1783.14	HGPENTLPMP
VGLEPGVGSRHPLMQPPQQ	1.15	AHT	-0.13	-0.64	-0.08	0.5	2027.63	VGLEPGVGSR
PFSPPPSKPKSPNQAALAP	1.64	AHT	-0.15	-0.86	0.08	2	1931.47	PFSPPPSKPK
QLQPMPYHSPSSGTASSPSLATRMHPGQ	1.34	AHT	-0.16	-0.81	-0.21	2	2951.69	QLQPMPYHSP
YRVRCCGTPGSPPGA	0.96	AHT	-0.19	-0.45	-0.03	2	1520.94	YRVRCCGTPG
EAAGSSHSRKTTGSKASASPSTSSTS	0.91	AHT	-0.27	-0.96	0.42	2.5	2467.88	EAAGSSHSRK
LSSLVYPDAGLGLVPTGAPGGPP	1.25	AHT	0.12	0.44	-0.45	-1	2135.79	LSSLVYPDAG
TEPAPGPPDASSSSPAASSLFH	1.21	AHT	-0.07	-0.47	0.03	-1.5	2110.5	TEPAPGPPDA
FGTPSSPSQSVPAQKANPFY	1.83	AHT	-0.11	-0.65	-0.27	1	2110.58	FGTPSSPSQS
HPPVPHQPPGPHRGPNGSGAAAPSG	1.36	AHT	-0.13	-1.12	-0.02	2.5	2376.94	HPPVPHQPPG
YSKSNGQPKSIGSAPPGPGQP	1.27	AHT	-0.19	-1.24	0.15	2	2054.55	YSKSNGQPKS
EPLPGGPARLGGPGPAPRPPKR	1.12	AHT	-0.24	-1.11	0.47	3	2174.85	EPLPGGPARL
QLGSATEVVGPGGGAEGSGPPPPPPPPPP	1.82	AHT	-0.01	-0.6	0.02	-2	2601.29	QLGSATEVVG
FRQDLCPPPPPHMPLAFGPPPPR	1.15	AHT	-0.13	-0.7	-0.12	1.5	2565.37	FRQDLCPPPP
DKAAAPPEEPPPAKKPAPSP	1.13	AHT	-0.24	-1.34	0.79	0	1995.51	DKAAAPPEEP
EDTGVACPSVEDSQEVCATSFSTSP	1.03	AHT	-0.12	-0.27	0.22	-5	2547	EDTGVACPSV
PTPQPPVIQTTPLPVTLPPA	1.63	AHT	0.02	-0.02	-0.51	0	2064.75	PTPQPPVIQT
SACPPSYGGSCTDNLCFPGVT	1.13	AHT	-0.01	0.1	-0.4	-1	2076.58	SACPPSYGGS
PPSAPCPGPELKWA	1.58	AHT	-0.05	-0.54	-0.06	0	1449.87	PPSAPCPGPE
EEGRPHQAPSTTQL	1.48	AHT	-0.33	-1.56	0.44	-0.5	1550.85	EEGRPHQAPS
LTTSPQGHFVGSDWQ	1.13	AHT	-0.07	-0.61	-0.43	-0.5	1660	LTTSPQGHFV
GYYEEAVPLSPG	1.88	AHT	0	-0.38	-0.17	-2	1281.55	GYYEEAVPLS
LHGMSEEQETEAFVEE	1.34	AHT	-0.18	-0.94	0.62	-5.5	1865.19	LHGMSEEQET
FAPLEPGPGPWAQT	1.12	AHT	0.04	-0.4	-0.42	-1	1467.84	FAPLEPGPGP
LDGHETDEIPEGLF	0.95	AHT	-0.09	-0.64	0.44	-4.5	1571.87	LDGHETDEIP
KPGEIDPNPETKPARPDPL	0.93	AHT	-0.33	-1.6	0.88	-1	2071.58	KPGEIDPNPE
LLSIRSPFSLVSLLSSESEQ	1.12	AHT	-0.05	0.41	-0.17	-1	2192.79	LLSIRSPFSL
MLPECPEGAGGLPP	0.94	AHT	0.04	-0.06	-0.03	-2	1367.8	MLPECPEGAG
KGTPASALSPPEPAP	1.34	AHT	-0.09	-0.59	0.19	0	1419.79	KGTPASALSP
CPPQPADLHTGVVPKAWLP	1.42	AHT	-0.01	-0.11	-0.35	0.5	2026.66	CPPQPADLHT
PEGTDTTVSFFHYS	1.5	AHT	-0.07	-0.53	-0.28	-1.5	1587.85	PEGTDTTVSF
WASRCPQPEPLLVPQK	1.65	AHT	-0.2	-0.68	-0.02	1	1849.41	WASRCPQPEP
LLQDDSREEEEEESGK	1.43	AHT	-0.5	-2.14	1.7	-6	1893.13	LLQDDSREEE
VGESPPTIQLPTP	2.04	AHT	-0.02	-0.27	-0.18	-1	1335.71	VGESPPTIQL
QPNYNALPNANYPS	1.28	AHT	-0.19	-1.31	-0.44	0	1562.85	QPNYNALPNA
GHNSTSSPTGSPAPSPTASPGH	1.49	AHT	-0.13	-1.02	-0.05	1	2031.38	GHNSTSSPTG
PGPPRGLSPRKLLEHVAP	1.49	AHT	-0.2	-0.66	0.24	2.5	1921.54	PGPPRGLSPR
GAHRLYSLKNSPTSVLPSFYE	1.13	AHT	-0.13	-0.4	-0.24	1.5	2366.96	GAHRLYSLKN
ASAAPSPAPSTPPASL	0.97	AHT	0.01	0.06	-0.22	0	1421.76	ASAAPSPAPS
AHVEGALPSPTPPSPPPC	1.72	AHT	-0.02	-0.36	-0.14	-0.5	1754.23	AHVEGALPSP
PGGMPGGMPGGFPGGGAPP	0.97	AHT	0.13	-0.25	-0.29	0	1595.11	PGGMPGGMPG
VPVPGAPPASQGSEEEVL	1.61	AHT	-0.02	-0.16	0.14	-3	1763.19	VPVPGAPPAS
HLQPPSYGPVLSPMSK	1.52	AHT	-0.08	-0.46	-0.32	1.5	1738.27	HLQPPSYGPV
SPLPAEPAGGSHGPSF	1.21	AHT	0	-0.41	-0.12	-0.5	1507.84	SPLPAEPAGG
SADESTTSSISPLGFSSGLPSATGREL	1.28	AHT	-0.1	-0.21	0.09	-2	2655.2	SADESTTSSI
EHTLSSYPLSSSKW	1.59	AHT	-0.16	-0.82	-0.19	0.5	1621.96	EHTLSSYPLS
PQGASPASQSYSYHSSGEYSSDF	1.33	AHT	-0.17	-1.09	-0.09	-1.5	2439.75	PQGASPASQS
PGLPGGQGPPGSPGPKGSPGFPGIPGP	1.36	AHT	0.02	-0.66	-0.09	1	2364.07	PGLPGGQGPP
PWSPSLPASSDHSTPASQSPHSS	1.38	AHT	-0.16	-0.99	-0.07	0	2347.74	PWSPSLPASS
TGSGTIIPPSGAPVTP	0.96	AHT	0.09	0.23	-0.39	0	1451.87	TGSGTIIPPS
PMGIPGSPGHMGPPGPIGPK	0.9	AHT	0.03	-0.44	-0.17	1.5	1881.55	PMGIPGSPGH
DGLPGPKGERGDPGPPGPPAY	1.2	AHT	-0.17	-1.34	0.5	-1	2031.51	DGLPGPKGER
FPGDAGLPGPPGFPGPPGLPGS	1.26	AHT	0.1	-0.22	-0.26	-1	1988.55	FPGDAGLPGP
SNPEPSFKANENGLPP	1.59	AHT	-0.22	-1.34	0.34	-1	1698.04	SNPEPSFKAN
VSGPLSPITSPLKPET	1.96	AHT	-0.04	-0.11	-0.05	0	1623.11	VSGPLSPITS
SPRGSPLAEGPQAFFP	1.14	AHT	-0.08	-0.46	-0.06	0	1658.06	SPRGSPLAEG
AGPEQYRELRPGSPYGVPPSPAAL	1.74	AHT	-0.15	-0.72	0.07	0	2510.14	AGPEQYRELR
EDYSPVGSFSEPGPASPFVTPPGW	1.98	AHT	-0.01	-0.48	-0.18	-3	2508.02	EDYSPVGSFS
PFPPPPPTATSHNNTLPHP	1.35	AHT	-0.11	-1.09	-0.33	1	2019.51	PFPPPPPTAT
KSEKEEKISEEWGFKDISTAQQM	1.3	AHT	-0.32	-1.41	0.85	-2	2729.35	KSEKEEKISE
QSLSVSRPGSRVPSLTPSGPGSGVASLT	1.23	AHT	-0.1	-0.09	-0.09	2	2682.39	QSLSVSRPGS
PPGPVPGPAPAPAAPPTQGEPPQPPPA	1.22	AHT	-0.03	-0.8	-0.04	-1	2490.18	PPGPVPGPAP
PECASPQFEGPLSPPPINYNGIFSLKQEE	1.82	AHT	-0.11	-0.67	0.02	-3	3189.97	PECASPQFEG
TSPQHLSGGLPGPPPWAPA	1.67	AHT	0.01	-0.5	-0.43	0.5	1867.37	TSPQHLSGGL
RYLKPLNPPQELLDAYPNNPQ	1.35	AHT	-0.26	-1.26	0.03	0	2481.12	RYLKPLNPPQ
CQSPTSKPPKPEQPLKVMPAPPPKENAW	2.08	AHT	-0.24	-1.24	0.31	2	3084.01	CQSPTSKPPK
GVSPPEVKVPKGPEVKPPKVPEV	1.81	AHT	-0.15	-0.6	0.53	1	2394.19	GVSPPEVKVP
PHCDSQTTMIEDASS	0.94	AHT	-0.21	-0.79	0.28	-2.5	1621.91	PHCDSQTTMI
RPVGGVLASQEAPRPSGVPPGPP	1.73	AHT	-0.11	-0.45	0.11	1	2222.86	RPVGGVLASQ
PSPGPSALSPGSSGLSNSHTPVRPPST	1.67	AHT	-0.13	-0.66	-0.05	1.5	2572.16	PSPGPSALSP
LLSLLLPETLNSPLLETFSDLQV	1.17	AHT	0.06	0.73	-0.47	-3	2556.36	LLSLLLPETL
EAPMTPSSSHHTREAKDQ	1.01	AHT	-0.38	-1.68	0.67	0	2009.38	EAPMTPSSSH
VFSERPLRPGESLFVEVG	1.05	AHT	-0.1	0.04	0.14	-1	2018.56	VFSERPLRPG
GIHDDPTGGEEGENSPD	1.07	AHT	-0.25	-1.74	0.93	-5.5	1725.9	GIHDDPTGGE
PAPLFTPPVLPPFPLMP	1.38	AHT	0.18	0.67	-0.83	0	1831.53	PAPLFTPPVL
PPVPPKPKLKSPLGK	1.48	AHT	-0.22	-0.97	0.48	4	1583.21	PPVPPKPKLK
APGPAGPLGEPGKEGP	1.28	AHT	-0.05	-0.84	0.39	-1	1430.81	APGPAGPLGE
KGEQGFMGPPGPQ	0.97	AHT	-0.14	-1.24	0.2	0	1329.69	KGEQGFMGPP
TAATPMSLPKSSSSGLAEVLGPPS	1.07	AHT	-0.02	0.09	-0.11	0	2285.93	TAATPMSLPK
GVLHVPVSPALPLT	1.29	AHT	0.18	1.14	-0.79	0.5	1399.91	GVLHVPVSPA
PGPAPSPGRPPAKPP	1.03	AHT	-0.19	-1.28	0.35	2	1422.84	PGPAPSPGRP
PKLSSPALSASAS	0.93	AHT	-0.06	0.15	-0.05	1	1215.53	PKLSSPALSA
QPPPSGSLACPSHPG	1.68	AHT	-0.07	-0.65	-0.18	0.5	1431.79	QPPPSGSLAC
DHSLPYSHSAAVTSYANSASLSTP	1.07	AHT	-0.08	-0.3	-0.34	0	2463.92	DHSLPYSHSA
HPPPAQSWPAQLPPRASLPG	1.65	AHT	-0.11	-0.79	-0.25	1.5	2104.68	HPPPAQSWPA
TSVPPAEGSCPSNAL	1.41	AHT	-0.04	-0.08	-0.11	-1	1429.76	TSVPPAEGSC
GEPPGGGDPGGGSGGVPGGR	1.17	AHT	-0.07	-0.95	0.39	-1	1620.96	GEPPGGGDPG
LCPPGPPGPPGPPPPGQVLPP	1.25	AHT	0.04	-0.48	-0.28	0	1968.65	LCPPGPPGPP
PKKPVPEKKPPAVV	1.56	AHT	-0.25	-0.91	0.71	3	1514.08	PKKPVPEKKP
VELSGPPGPTGQSFA	1.63	AHT	0.01	-0.18	-0.19	-1	1443.79	VELSGPPGPT
GLGLVLGPPLGGFLY	0.93	AHT	0.3	1.3	-1.02	0	1473.04	GLGLVLGPPL
GIPGQPGLPGPPGPPGPPGPPGLGG	1.32	AHT	0.08	-0.52	-0.21	0	2124.82	GIPGQPGLPG
PGDKTKSTALPSTE	1.22	AHT	-0.27	-1.18	0.65	0	1431.75	PGDKTKSTAL
PNQPKPEGRQMTPVKGEPLGVL	1.37	AHT	-0.22	-0.99	0.33	1	2373.11	PNQPKPEGRQ
NPLSPQTGRPAPSASLIPSVS	1.5	AHT	-0.09	-0.22	-0.16	1	2076.63	NPLSPQTGRP
PPSRPAVPRTQLQPEPPS	1.78	AHT	-0.3	-1.29	0.32	1	1954.46	PPSRPAVPRT
HCQFSAQPPPSLQ	1.47	AHT	-0.14	-0.71	-0.39	0.5	1439.79	HCQFSAQPPP
DPQAHEIVPSPPQQEATA	1.12	AHT	-0.17	-1	0.23	-2.5	1915.3	DPQAHEIVPS
PPDSESTPSSSSAAGTATGPQGAQGT	1.2	AHT	-0.14	-0.86	0.18	-2	2346.71	PPDSESTPSS
TSSHSEDTPKSSLDSGEGPSGMASQ	1.03	AHT	-0.24	-1.17	0.51	-2.5	2479.87	TSSHSEDTPK
PWALGTLLRPSELRRS	0.97	AHT	-0.24	-0.43	0.07	2	1852.4	PWALGTLLRP
YLQPASPTSSQKDKA	1.25	AHT	-0.29	-1.23	0.32	1	1620.98	YLQPASPTSS
GNQTSSGATDSEDSYDSWYIDEPQ	0.94	AHT	-0.26	-1.52	0.38	-6	2652.92	GNQTSSGATD
PGYGPPPGPPPPQQGPPPPPG	0.99	AHT	-0.07	-1.48	-0.09	0	1985.53	PGYGPPPGPP
NPTNPTVPSKPGGPSAL	1.85	AHT	-0.12	-0.76	-0.04	1	1634.06	NPTNPTVPSK
LPPEPSPTLFAGPS	1.9	AHT	0.03	-0.14	-0.24	-1	1409.79	LPPEPSPTLF
PIPLSSSSTAASSCE	1.38	AHT	-0.05	0.15	-0.08	-1	1436.74	PIPLSSSSTA
LSCGISKESSLGEFP	0.92	AHT	-0.05	0.06	0.09	-1	1553.96	LSCGISKESS
SLSPPPSTGSLSNS	1.36	AHT	-0.1	-0.47	-0.14	0	1330.6	SLSPPPSTGS
VSPEDLALQASPGPN	0.95	AHT	-0.08	-0.36	0.06	-2	1494.83	VSPEDLALQA
YSIYTPLASVPTEY	1.79	AHT	0.03	0.05	-0.69	-1	1603.98	YSIYTPLASV
LPSTSLFPGSFVGAQ	1.06	AHT	0.11	0.57	-0.66	0	1507.92	LPSTSLFPGS
TATTASPAASHPLASSPLSGPPSP	1.41	AHT	-0.02	-0.15	-0.25	0.5	2202.72	TATTASPAAS
LQDSAKRYSLGSITNPSPISSPTFSP	1.15	AHT	-0.15	-0.49	-0.07	1	2751.41	LQDSAKRYSL
PHLLTLVSSSIPVP	1.18	AHT	0.13	0.94	-0.73	0.5	1459.96	PHLLTLVSSS
EGRLPPGLSASPQPS	1.71	AHT	-0.17	-0.78	0.2	0	1492.86	EGRLPPGLSA
FTGIPVSPTHSHPV	1.65	AHT	0.05	0.08	-0.61	1	1475.87	FTGIPVSPTH
ERRQHKPSEGSRQ	1.34	AHT	-0.76	-2.94	1.42	2.5	1594.89	ERRQHKPSEG
GPPGLLGPPGPLGP	1.36	AHT	0.14	-0.01	-0.39	0	1225.67	GPPGLLGPPG
PTYNTTLSEASLIGT	1.13	AHT	-0.02	-0.05	-0.4	-1	1567.93	PTYNTTLSEA
EWHSSVSGKKFPVFNPAT	0.93	AHT	-0.1	-0.54	-0.15	1.5	2018.51	EWHSSVSGKK
SPPGPEPSTSSLGTTL	2.2	AHT	-0.07	-0.53	-0.04	-1	1527.87	SPPGPEPSTS
TTDVSQLTPPSQDQSQVP	1.58	AHT	-0.23	-1.01	0.09	-2	1928.3	TTDVSQLTPP
CQDGDLMKPYPGTEEE	0.92	AHT	-0.27	-1.42	0.71	-4	1812.18	CQDGDLMKPY
GRPSPAPPAVPPAASP	1	AHT	-0.07	-0.39	0.01	1	1468.87	GRPSPAPPAV
LSVRPGPPPIRPGPPPIRP	1.2	AHT	-0.17	-0.66	0.13	3	2000.69	LSVRPGPPPI
PRPGQLANGFFL	1.06	AHT	-0.03	-0.04	-0.48	1	1316.7	PRPGQLANGF
GCPLGPAPLLS	0.97	AHT	0.16	0.85	-0.6	0	1024.4	GCPLGPAPLL
DSGSVPAPGPGQ	1.04	AHT	-0.07	-0.72	0.15	-1	1068.27	DSGSVPAPGP
PGPPVVPEMP	1.79	AHT	0.05	-0.16	-0.13	-1	1019.36	PGPPVVPEMP
SPHCPGTSAEFF	1.05	AHT	-0.02	-0.23	-0.32	-0.5	1279.54	SPHCPGTSAE
PATFGHLAGG	0.91	AHT	0.15	0.35	-0.62	0.5	927.17	PATFGHLAGG
RFHGGALPA	0.95	AHT	-0.03	0.01	-0.31	1.5	925.18	RFHGGALPA
KYPVEPFTES	0.99	AHT	-0.18	-0.99	0.26	-1	1196.45	KYPVEPFTES
APSGLGSQV	1.09	AHT	0.04	0.26	-0.33	0	815.02	APSGLGSQV
KMALDIEIAAYR	0.93	AHT	-0.1	0.28	0.12	0	1393.83	KMALDIEIAA
ASEMGGGPPASN	1.29	AHT	-0.06	-0.62	0.12	-1	1074.29	ASEMGGGPPA
HGMMTLGPSG	1.32	AHT	0.06	0.01	-0.5	0.5	987.31	HGMMTLGPSG
GRPYGLHPA	1.21	AHT	-0.13	-0.82	-0.23	1.5	967.22	GRPYGLHPA
QTPPSSGPAVQS	1.18	AHT	-0.13	-0.78	-0.09	0	1155.39	QTPPSSGPAV
PLADSPGFLNE	1.25	AHT	-0.03	-0.25	-0.01	-2	1159.41	PLADSPGFLN
ASGAGAPPRGLG	0.98	AHT	-0.02	-0.08	0	1	1010.28	ASGAGAPPRG
KIVDVIVGKDEK	1.28	AHT	-0.18	-0.08	0.83	0	1342.78	KIVDVIVGKD
QLPQGPPSPPVQ	1.23	AHT	-0.12	-0.97	-0.2	0	1244.59	QLPQGPPSPP
PPGGRKMTVFL	1.31	AHT	-0.08	-0.04	-0.14	2	1202.64	PPGGRKMTVF
KIWKSHYVPPPE	1.14	AHT	-0.17	-1.13	-0.02	1.5	1480.9	KIWKSHYVPP
AGSGGPGFTFT	1.41	AHT	0.13	0.18	-0.55	0	998.21	AGSGGPGFTF
PGTPGEKGNVGGPGIPG	1.3	AHT	-0.03	-0.71	0.15	0	1490.9	PGTPGEKGNV
SPFSSGSSVTSPSGTR	1.14	AHT	-0.16	-0.53	0.02	1	1540.81	SPFSSGSSVT
PLAPEPVLSGAYTW	1.57	AHT	0.1	0.21	-0.64	-1	1500.91	PLAPEPVLSG
PSRPIAPAPPSALSLPPKVPGQV	1.68	AHT	-0.05	-0.07	-0.12	2	2277.03	PSRPIAPAPP
LTGYYSWQSSQDER	1.29	AHT	-0.31	-1.55	0.01	-1	1719.98	LTGYYSWQSS
PPVHRRPDSSGGSPSPPAGESG	1.03	AHT	-0.25	-1.29	0.5	0.5	2128.54	PPVHRRPDSS
KVPGSLGHPHPQEKDVWEEM	1.41	AHT	-0.21	-1.25	0.4	-1	2300.88	KVPGSLGHPH
PILAPLGGKVELSCQLSPPQT	0.99	AHT	0	0.2	-0.26	0	2148.87	PILAPLGGKV
GMPAPAPAGPAPIPTDPFQQPPP	1.01	AHT	0	-0.5	-0.2	-1	2251.9	GMPAPAPAGP
NAFGPPLPPPGLGGAFG	0.95	AHT	0.15	0.19	-0.55	0	1566.04	NAFGPPLPPP
LGSRPLSTAMPPPPG	0.96	AHT	-0.06	-0.29	-0.15	1	1477.95	LGSRPLSTAM
APGEECLSSPSFVPQ	2.21	AHT	-0.05	-0.2	-0.01	-2	1547.9	APGEECLSSP
APAPSTRRPPAPNLHV	0.98	AHT	-0.22	-0.74	0.05	2.5	1681.14	APAPSTRRPP
RGLQAPAPGPPSPHSFL	1.4	AHT	-0.07	-0.45	-0.22	1.5	1729.21	RGLQAPAPGP
QTQTPPGGPGGGGAGAPV	0.96	AHT	0.01	-0.54	-0.16	0	1505.88	QTQTPPGGPG
VPFLTSASPLLPPA	1.79	AHT	0.16	0.95	-0.73	0	1409.88	VPFLTSASPL
HHSASEPLVSPISA	0.93	AHT	-0.02	-0.01	-0.21	0	1431.76	HHSASEPLVS
RALEVASLPQQSPS	1.25	AHT	-0.18	-0.37	0.09	0	1482.85	RALEVASLPQ
RVDRGNPPPIPPKK	1.16	AHT	-0.43	-1.68	0.85	3	1571.05	RVDRGNPPPI
QPARPSARSKLRR	1.08	AHT	-0.65	-1.75	1	5	1522.94	QPARPSARSK
PVTMGAVPAPQAPPP	1.34	AHT	0.06	0.1	-0.4	0	1429.9	PVTMGAVPAP
PPTPTAPSAGSQHSG	1.59	AHT	-0.11	-0.94	-0.08	0.5	1391.66	PPTPTAPSAG
ASTFLSPAFPGSQT	1.23	AHT	0.03	0.15	-0.54	0	1410.73	ASTFLSPAFP
GAPSSPAAGVLPSPQG	1.08	AHT	0.03	-0.01	-0.23	0	1392.75	GAPSSPAAGV
EHEGNGKVSPGSSGLPKPQAAP	1.23	AHT	-0.18	-1.08	0.39	0.5	2144.65	EHEGNGKVSP
PGVPGAPGLKGSDGIPGPPGLDGFH	0.96	AHT	0.03	-0.27	-0.04	-0.5	2296.95	PGVPGAPGLK
PAPAPVPAPDGGPREEL	1	AHT	-0.12	-0.71	0.42	-2	1670.08	PAPAPVPAPD
ARSPSSSPGQLGQP	1.29	AHT	-0.23	-1.05	0.16	1	1368.66	ARSPSSSPGQ
PSPMASRVPLEATP	0.96	AHT	-0.11	-0.23	0.04	0	1452.87	PSPMASRVPL
LPSQGVLLHPYGVPMIVP	1.1	AHT	0.16	0.8	-0.85	0.5	1917.63	LPSQGVLLHP
PEYSEVAYPDYFG	1.09	AHT	-0.06	-0.77	-0.16	-3	1536.78	PEYSEVAYPD
SGSYSPGVTYSPISGYNK	1.07	AHT	-0.09	-0.65	-0.33	1	1864.25	SGSYSPGVTY
KFIQSMHGPTGHCPHP	1.19	AHT	-0.1	-0.78	-0.31	2.5	1774.29	KFIQSMHGPT
ELTGALESSGTGS	1.06	AHT	-0.05	-0.2	0.15	-2	1208.43	ELTGALESSG
PATPGVPSGGSAP	1.14	AHT	0.04	-0.16	-0.18	0	1094.36	PATPGVPSGG
SPRVLPVTTPEEDGSLTSQN	1.45	AHT	-0.21	-0.79	0.27	-2	2127.58	SPRVLPVTTP
ASDSETEGAPKPQASDSESEE	1.66	AHT	-0.34	-1.66	1.13	-6	2151.36	ASDSETEGAP
ECKSFESTPSFEESERKQ	2.16	AHT	-0.43	-1.71	1.06	-2	2148.52	ECKSFESTPS
PTSPQELPCSSEGGRE	2.16	AHT	-0.29	-1.31	0.62	-2	1673.99	PTSPQELPCS
KEGLAPPPPPKES	1.9	AHT	-0.24	-1.42	0.77	0	1346.72	KEGLAPPPPP
NGPPASTTASTQL	1.33	AHT	-0.1	-0.53	-0.23	0	1244.5	NGPPASTTAS
YETTPIPESKLPPVYVRKER	1.26	AHT	-0.3	-1.09	0.47	1	2403.06	YETTPIPESK
PPGVGGLPGHIGS	1.31	AHT	0.13	0.13	-0.41	0.5	1144.5	PPGVGGLPGH
CRSPRSEPRSQESGGTDT	1.47	AHT	-0.51	-1.87	0.98	0	1950.26	CRSPRSEPRS
FPYYPSLGTALYGEEK	0.94	AHT	-0.04	-0.51	-0.29	-1	1835.27	FPYYPSLGTA
VAEEAPPPPPVVPS	1.34	AHT	0.01	-0.09	0.06	-2	1385.76	VAEEAPPPPP
PSLDSLFFGPSASQVLYLTEV	1.09	AHT	0.07	0.56	-0.52	-2	2270.87	PSLDSLFFGP
ASEPLPAPPGSPPPSAAPT	1.19	AHT	-0.02	-0.46	-0.02	-1	1741.17	ASEPLPAPPG
CSEQRCPAPYEICP	1.05	AHT	-0.22	-0.58	0.14	-1	1596	CSEQRCPAPY
EAEPLSGFKDTSSP	1.73	AHT	-0.19	-0.91	0.55	-2	1464.73	EAEPLSGFKD
GHSTSTSTSPATTLQRNVEG	1.69	AHT	-0.22	-0.87	0.06	0.5	2031.41	GHSTSTSTSP
GGDVPPAPLAPAGPAPYSPPGPGP	1.35	AHT	0.05	-0.35	-0.18	-1	2136.72	GGDVPPAPLA
PSVYSFFSEEGTGK	1.74	AHT	-0.09	-0.56	0.05	-1	1534.83	PSVYSFFSEE
EPEDPAHKPPSPHD	1.35	AHT	-0.35	-2.24	0.99	-2	1552.8	EPEDPAHKPP
TQSSGGPTGDTEKFLTL	1.03	AHT	-0.13	-0.66	0.12	-1	1739.12	TQSSGGPTGD
RTTLSGPRSKPASP	1.47	AHT	-0.36	-1.16	0.49	3	1454.83	RTTLSGPRSK
LMGESSEDEGQREYQ	1.1	AHT	-0.38	-1.8	0.91	-4	1758.02	LMGESSEDEG
DTLPGRCEKPEPSL	0.95	AHT	-0.3	-1.11	0.74	-1	1541.93	DTLPGRCEKP
PSTASGVPATTLL	1.12	AHT	0.08	0.62	-0.52	0	1214.56	PSTASGVPAT
SFSPSLSPLAARSPVVSPFG	1.25	AHT	0.02	0.45	-0.39	1	2003.55	SFSPSLSPLA
CVCCDSPLFSSEKKFCSGTGWPSF	1.06	AHT	-0.06	0.08	-0.21	0	2616.31	CVCCDSPLFS
EKPYRCSECWKTFSQS	1.58	AHT	-0.36	-1.37	0.34	1	1979.42	EKPYRCSECW
PQLEPPALQSEVPK	2.15	AHT	-0.17	-0.82	0.29	-1	1532.96	PQLEPPALQS
FPEVRPQPGFPGADGFLNGPYG	1.05	AHT	-0.04	-0.53	-0.19	-1	2319.88	FPEVRPQPGF
PPPASKPPSLSRKSSV	1.25	AHT	-0.27	-0.91	0.42	3	1635.1	PPPASKPPSL
QSSSLYSDPLATSKSYRASST	1.28	AHT	-0.25	-0.77	0.08	1	2236.65	QSSSLYSDPL
PHLVDSSPESTSCPAALVSSTAPT	1.46	AHT	-0.05	0.02	-0.12	-1.5	2354.89	PHLVDSSPES
GEEKKEAMAKDGKEDEK	0.97	AHT	-0.53	-2.31	1.98	-2	1922.33	GEEKKEAMAK
RPGPTELGSGSGTPKLIQ	0.94	AHT	-0.16	-0.71	0.2	1	1795.3	RPGPTELGSG
NNNCEPVVTQPKPKL	1.28	AHT	-0.28	-1.07	0.24	1	1681.16	NNNCEPVVTQ
SPEGQPMAGYTETQSHVTVRPPGSM	1.13	AHT	-0.16	-0.84	0.01	-0.5	2645.28	SPEGQPMAGY
EKYLEETGSLSAPSEY	1.63	AHT	-0.19	-1.01	0.42	-3	1803.13	EKYLEETGSL
QVPRALPKTQPAPQGH	1.59	AHT	-0.25	-1.12	0.09	2.5	1725.22	QVPRALPKTQ
PPARRTSPASGLWSP	1.27	AHT	-0.21	-0.83	0.02	2	1579.97	PPARRTSPAS
LGLRAPTPGPPTPPSVPS	1.7	AHT	-0.05	-0.33	-0.16	1	1741.27	LGLRAPTPGP
GPAVVPPQYYGVTPW	2.31	AHT	0.1	-0.03	-0.88	0	1631.08	GPAVVPPQYY
PVKKAKSPTPSPSPARNS	1.23	AHT	-0.35	-1.32	0.58	4	1849.35	PVKKAKSPTP
SGGGPAPGSPESPWTQLEP	1.83	AHT	-0.08	-0.97	0.05	-2	1851.23	SGGGPAPGSP
PSGADVPFGPPLA	1.05	AHT	0.1	0.22	-0.27	-1	1224.55	PSGADVPFGP
KDNPSEIQGTFQQ	0.94	AHT	-0.32	-1.62	0.42	-1	1491.77	KDNPSEIQGT
LTVEPSQRSGTAMNRSPSPL	1.01	AHT	-0.24	-0.69	0.14	1	2128.67	LTVEPSQRSG
LLGPPGLLGPPGPLGPSG	1.45	AHT	0.16	0.34	-0.48	0	1596.19	LLGPPGLLGP
PVGAPGLGGPPGEPGLPGL	1.57	AHT	0.13	0.08	-0.23	-1	1639.18	PVGAPGLGGP
PGLQGPPGFEGAPGKPGP	1.48	AHT	-0.03	-0.81	0.08	0	1660.13	PGLQGPPGFE
PGPMGPPGLPGPPGPKGD	1.14	AHT	-0.04	-0.94	0.16	0	1625.14	PGPMGPPGLP
FEDIILWEKIEEAEPSPGPGTLTLISKS	0.99	AHT	-0.05	-0.18	0.18	-4	3100.94	FEDIILWEKI
TMPPPTHTAFSGHHLP	1.01	AHT	-0.03	-0.56	-0.53	1.5	1728.19	TMPPPTHTAF
PLGDCSSGAAGGPGPVRPPVP	1.15	AHT	-0.02	-0.14	-0.01	0	1888.42	PLGDCSSGAA
PTSEFTTRLTTQAPRRLTSHTTVTRT	0.94	AHT	-0.34	-0.91	0.12	3.5	2960.67	PTSEFTTRLT
FSPHIFWGPSPHGFFWAPQPS	1.16	AHT	0.09	-0.26	-0.9	1	2427.02	FSPHIFWGPS
AASLKRPDSGASGLPGLPGPPGPP	0.91	AHT	-0.07	-0.45	0.12	1	2196.83	AASLKRPDSG
LALVNQHPIGPFPRVQSPPHL	1.39	AHT	-0.04	-0.08	-0.49	2	2318.05	LALVNQHPIG
DPTYDYPGPSQPGP	1.67	AHT	-0.18	-1.67	0.11	-2	1490.73	DPTYDYPGPS
RPGLSGEPGVRGPVGP	1.51	AHT	-0.14	-0.59	0.28	1	1531.97	RPGLSGEPGV
NSDGESKASSAPSPSSEP	0.95	AHT	-0.28	-1.39	0.74	-2	1733.94	NSDGESKASS
EFKGRKRIPEPILPSATISPPPTPAPVA	0.93	AHT	-0.13	-0.37	0.18	2	2967.9	EFKGRKRIPE
LEPEPTSVIEGSIDLG	1.01	AHT	0	0.03	0.22	-4	1656.06	LEPEPTSVIE
ETSYRFSRNEAPEGS	1.06	AHT	-0.4	-1.65	0.69	-1	1729.97	ETSYRFSRNE
ATPEKTPEKQDICLK	0.96	AHT	-0.33	-1.18	0.82	0	1701.18	ATPEKTPEKQ
QASLESLSPRASLAQPPLQD	1.12	AHT	-0.18	-0.47	0.1	-1	2108.62	QASLESLSPR
AQEPPPCGPGRCD	0.93	AHT	-0.26	-1.18	0.52	-1	1326.63	AQEPPPCGPG
AQKPPGPPTAGQHG	1.34	AHT	-0.17	-1.34	0.11	1.5	1342.68	AQKPPGPPTA
SPEPGPGPWAEERPAERNL	1.01	AHT	-0.29	-1.56	0.65	-2	2089.51	SPEPGPGPWA
AVPPGVPPPGPHGPSP	1.51	AHT	0.04	-0.49	-0.23	0.5	1459.89	AVPPGVPPPG
GPQVGSFSKAGSEYPT	1.39	AHT	-0.1	-0.68	-0.01	0	1611.95	GPQVGSFSKA
HYCGSARPPTLVSLGH	1.23	AHT	-0.07	-0.15	-0.42	2	1695.16	HYCGSARPPT
RGVVPRQPRIPRP	1.14	AHT	-0.46	-1.18	0.57	4	1528.02	RGVVPRQPRI
WIEFEEIADLEERAKSQFFEKVHEE	1.2	AHT	-0.23	-0.93	0.69	-5.5	3139.79	WIEFEEIADL
HPGKPGRPGERGVVGPQG	1.53	AHT	-0.25	-1.31	0.48	2.5	1782.27	HPGKPGRPGE
RRQPAPYVPTISHP	1.77	AHT	-0.27	-1.03	-0.04	2.5	1619.05	RRQPAPYVPT
HLPDAESDEDEDFKE	1.31	AHT	-0.39	-1.94	1.47	-6.5	1775.95	HLPDAESDED
SSSQETSKGLGPNMSSTP	1.23	AHT	-0.22	-1.05	0.24	0	1795.16	SSSQETSKGL
EEWIQLPSVMSSP	1.26	AHT	-0.03	-0.2	-0.21	-2	1502.89	EEWIQLPSVM
PPPLPEPLTTLPPPPAGPP	1.02	AHT	0.01	-0.51	-0.19	-1	1885.5	PPPLPEPLTT
PFLCGEGLPRPKTPSD	1.02	AHT	-0.18	-0.7	0.3	0	1714.19	PFLCGEGLPR
PAPSPLVGFSQFPQQL	1.66	AHT	0.02	0.02	-0.59	0	1713.2	PAPSPLVGFS
TTVKFSELSEEMLWEY	0.97	AHT	-0.1	-0.41	0.01	-3	1992.46	TTVKFSELSE
PAGWKYSSNVRAPPPVA	1.08	AHT	-0.11	-0.51	-0.2	2	1797.27	PAGWKYSSNV
SSHSESANLFPEAH	1.1	AHT	-0.15	-0.82	0.08	-1	1512.74	SSHSESANLF
LSSEAWPPAASCPSS	1.37	AHT	-0.03	-0.1	-0.21	-1	1489.8	LSSEAWPPAA
FFSTATSLTPPCP	1.54	AHT	0.06	0.4	-0.68	0	1368.73	FFSTATSLTP
PAPVAGPSPASTPTTADSSEQHF	1.19	AHT	-0.09	-0.57	-0.01	-1.5	2252.68	PAPVAGPSPA
VVPKKPPPSPQSTEEDP	2.07	AHT	-0.29	-1.49	0.73	-1	1832.27	VVPKKPPPSP
TKSCGGMIPEHGHTPQSHP	1.5	AHT	-0.17	-1.08	0.02	1.5	2001.51	TKSCGGMIPE
YHEYIDENLPPESPYLY	1.07	AHT	-0.13	-1.14	-0.15	-3.5	2142.55	YHEYIDENLP
GGVGPGPGLARHSPHGS	0.93	AHT	-0.06	-0.58	-0.07	2	1539.93	GGVGPGPGLA
SHSQMRPELPPLPAS	1.43	AHT	-0.2	-0.81	0.08	0.5	1647.09	SHSQMRPELP
EEYPGPPDQPEERLIMAH	1.17	AHT	-0.24	-1.38	0.56	-3.5	2108.57	EEYPGPPDQP
YLPIGGKLTPQSP	1.44	AHT	-0.02	-0.28	-0.35	1	1370.81	YLPIGGKLTP
QALALPLTPLPVGLQP	1.12	AHT	0.13	0.77	-0.72	0	1628.24	QALALPLTPL
FRSPAAPSPLALRQ	0.98	AHT	-0.18	-0.22	-0.06	2	1510.94	FRSPAAPSPL
RKETEPSSSSVFNQNDP	0.96	AHT	-0.41	-1.74	0.73	-1	1922.22	RKETEPSSSS
KEDSDETSSNQIYE	1.22	AHT	-0.42	-2.02	1.06	-4	1644.81	KEDSDETSSN
RGPSPEFQIPTVSEA	1.54	AHT	-0.15	-0.61	0.21	-1	1614.98	RGPSPEFQIP
SGRGPCGWTSGPCPQ	1.36	AHT	-0.15	-0.84	-0.13	1	1489.85	SGRGPCGWTS
PATQTSVCSPTSNSQTVT	1.94	AHT	-0.15	-0.43	-0.26	0	1809.18	PATQTSVCSP
LAFPPPPSQAAPDMSKP	1.12	AHT	-0.08	-0.48	-0.02	0	1751.25	LAFPPPPSQA
GLPGVGVPGVGVPGVGVPG	1.17	AHT	0.25	1.02	-0.57	0	1571.16	GLPGVGVPGV
SSRPASPVPASTPAW	1.18	AHT	-0.11	-0.41	-0.17	1	1510.85	SSRPASPVPA
PGMFSSTEPA	1.21	AHT	-0.02	-0.29	-0.11	-1	1023.25	PGMFSSTEPA
PVVSPGGNPGPS	1.49	AHT	0.01	-0.36	-0.18	0	1064.33	PVVSPGGNPG
GMPPVSSTQL	1.07	AHT	0	0.05	-0.42	0	1016.32	GMPPVSSTQL
QSGTPGPVFVEL	1.21	AHT	0.05	0.21	-0.35	-1	1230.56	QSGTPGPVFV
PSQPLPGTASV	1.19	AHT	-0.01	-0.11	-0.31	0	1053.33	PSQPLPGTAS
FYPQIIPLSAS	1	AHT	0.14	0.71	-0.9	0	1235.6	FYPQIIPLSA
HPPNPAVPVHPVPPPHALAAH	1.32	AHT	0.02	-0.26	-0.48	2	2152.79	HPPNPAVPVH
GPGKGGPESITNSTEYPPTGSPGQ	1.61	AHT	-0.15	-1.23	0.21	-1	2315.79	GPGKGGPESI
KHKKKELSLESGVYSFEEE	0.94	AHT	-0.33	-1.36	0.92	-0.5	2267.8	KHKKKELSLE
LATRGQVEPPPPSSPETLALRPRIQPQ	1.39	AHT	-0.24	-0.81	0.21	1	2936.76	LATRGQVEPP
AGIPGVGPFGGQQPGVPLGY	1.22	AHT	0.13	0.19	-0.57	0	1868.44	AGIPGVGPFG
SESRESQDLPQEDSCPDPLDGD	1.07	AHT	-0.39	-1.72	1.09	-7	2419.72	SESRESQDLP
QEPRAVGAPGPGLSPLGPPK	1.62	AHT	-0.11	-0.6	0.17	1	1925.51	QEPRAVGAPG
PPGKRGPPGPAGPEGRQGEKGA	1.1	AHT	-0.29	-1.64	0.78	2	2097.64	PPGKRGPPGP
GPPMMDGAMGYVQPPPPPYPGPMEPPVSG	1.26	AHT	0.01	-0.54	-0.23	-2	2951.86	GPPMMDGAMG
PGGVPGGVFFPGAGLGGLGVGGLGPGVK	0.95	AHT	0.21	0.72	-0.5	1	2378.23	PGGVPGGVFF
PGEPGLPGPPGLLGLPGL	1.44	AHT	0.14	0.19	-0.33	-1	1638.23	PGEPGLPGPP
ALELPEPRSTPLSSLVEQVAQ	1.26	AHT	-0.12	-0.13	0.08	-2	2264.87	ALELPEPRST
FSNPPITSLEELKIDSRPPSPEP	1.61	AHT	-0.2	-0.87	0.4	-2	2551.17	FSNPPITSLE
SPTSPKSKSWISEDDFYRPP	1.21	AHT	-0.3	-1.44	0.46	0	2324.79	SPTSPKSKSW
PAPSSPQSTPGPTVPGPSALGPLA	1.8	AHT	0.01	-0.2	-0.25	0	2183.78	PAPSSPQSTP
PASSLPPSVQQKILATATTSTSGTVEP	1.64	AHT	-0.07	-0.1	-0.15	0	2669.37	PASSLPPSVQ
PSLPSVNQDHDLKPGPKPGSMPPA	1.09	AHT	-0.18	-1	0.25	0.5	2467.14	PSLPSVNQDH
QASPRLQEEELGVGSPK	1.1	AHT	-0.27	-1.05	0.61	-1	1825.26	QASPRLQEEE
TSSQCGKYYSSAPEEGGATHVY	1.37	AHT	-0.15	-0.85	-0.06	-0.5	2322.75	TSSQCGKYYS
TRHYSCPSVSYSSDLPATSVIITFH	0.99	AHT	-0.06	0.05	-0.46	1	2769.43	TRHYSCPSVS
WLELSSGGPVLSLAPLSTTAPSLFST	1.51	AHT	0.1	0.63	-0.6	-1	2632.39	WLELSSGGPV
SVEQLQPPAPGPASHTGTPKVKRAPSL	1.69	AHT	-0.17	-0.7	0.14	2.5	2751.53	SVEQLQPPAP
YKPSQGSGARPAPGPV	1.49	AHT	-0.18	-0.91	0.12	2	1568.97	YKPSQGSGAR
QDPQSQDISGLGDSEID	0.96	AHT	-0.24	-1.18	0.65	-5	1804.06	QDPQSQDISG
PLFQHWEPQVPTALP	1.92	AHT	0	-0.35	-0.6	-0.5	1760.25	PLFQHWEPQV
LPSHGGPKPSAES	1.48	AHT	-0.15	-1	0.32	0.5	1263.55	LPSHGGPKPS
SAASASSETIKETTEL	1.12	AHT	-0.16	-0.38	0.43	-2	1624.93	SAASASSETI
QPSHGGADGPEDKTEEV	1.26	AHT	-0.28	-1.65	0.92	-3.5	1753.01	QPSHGGADGP
SRSIQWPTSCSSKP	1.39	AHT	-0.29	-0.98	0.08	2	1563.93	SRSIQWPTSC
SSSSESEMTAESEEEQ	1.5	AHT	-0.35	-1.64	1.11	-6	1746.89	SSSSESEMTA
RALEQTPGSSTDNLESSV	1.03	AHT	-0.25	-0.83	0.4	-2	1891.23	RALEQTPGSS
LTLPPSLPGGDSGEL	1.18	AHT	0.02	-0.01	-0.07	-2	1452.85	LTLPPSLPGG
PPTSTSSPPSTASF	1.65	AHT	-0.09	-0.56	-0.19	0	1363.61	PPTSTSSPPS
DHSCMQLYWETSPWGPCSED	1.38	AHT	-0.15	-0.99	-0.1	-3.5	2371.83	DHSCMQLYWE
PSRGPRNPSSTEGGSPDYYKG	1.06	AHT	-0.35	-1.8	0.54	1	2209.6	PSRGPRNPSS
SSYVPQEAISSAL	1.03	AHT	-0.01	0.23	-0.31	-1	1351.65	SSYVPQEAIS
EKHGEEFFPTSNSLLHG	1.31	AHT	-0.15	-0.93	0.16	-1	1929.33	EKHGEEFFPT
LPPSSPSLASFND	1.29	AHT	-0.05	-0.22	-0.17	-1	1331.61	LPPSSPSLAS
GPEPEPEPRLQVTLVDCPGH	1.56	AHT	-0.17	-0.81	0.33	-2.5	2170.72	GPEPEPEPRL
TVLSPTASEPDTTLTKTSPKN	1.48	AHT	-0.21	-0.77	0.24	0	2188.71	TVLSPTASEP
KAYSVQPPESMSPTAATE	1.35	AHT	-0.16	-0.71	0.15	-1	1894.32	KAYSVQPPES
SFTTASTQTPPQCQLPA	1.7	AHT	-0.11	-0.41	-0.39	0	1778.2	SFTTASTQTP
LLPRTSESQSQPVPLKA	1.58	AHT	-0.21	-0.55	0.15	1	1851.38	LLPRTSESQS
TAVLTSPPAPAPPVTPSKPMAGTT	0.96	AHT	0	0.03	-0.27	1	2290	TAVLTSPPAP
QRHGVPPPSKPTAGTGITQKN	1.26	AHT	-0.26	-1.24	0.21	3.5	2171.76	QRHGVPPPSK
EPVSSSLPRSRRES	1.32	AHT	-0.49	-1.41	0.94	1	1586.9	EPVSSSLPRS
HRVSYCPQLTFTPSQMTFTQGMS	0.95	AHT	-0.12	-0.37	-0.51	1.5	2648.36	HRVSYCPQLT
CKQPEPPVRDSSGR	0.99	AHT	-0.47	-1.68	0.95	1	1555.91	CKQPEPPVRD
ATNSVPPVSSAAPKPTS	1.13	AHT	-0.09	-0.27	-0.05	1	1611	ATNSVPPVSS
FPGKPGTGKPGLHGQPG	1.16	AHT	-0.1	-1.02	0.06	2.5	1632.12	FPGKPGTGKP
PPPQPGASPPAVPQ	1.5	AHT	-0.07	-0.83	-0.13	0	1339.7	PPPQPGASPP
VLSELPTAATGSS	1.06	AHT	0.03	0.47	-0.23	-1	1232.53	VLSELPTAAT
LYGESSNNPSSAE	1.05	AHT	-0.21	-1.15	0.23	-2	1354.52	LYGESSNNPS
VRCTSGSHSSTCETAPVPS	1.72	AHT	-0.17	-0.3	0.02	0.5	1906.32	VRCTSGSHSS
RKASESTAPTPPTPRPRSSL	1.47	AHT	-0.39	-1.34	0.61	3	2136.65	RKASESTAPT
AVLQVRPPAGCPPDAPSSQPSSRCV	1.05	AHT	-0.16	-0.24	0.03	1	2520.21	AVLQVRPPAG
LGPSPPAPDVLEFTDH	1.13	AHT	-0.03	-0.35	0.02	-2.5	1692.08	LGPSPPAPDV
SEGLGSGTSSETSRF	1.44	AHT	-0.2	-0.77	0.36	-1	1501.73	SEGLGSGTSS
PGSGAPGNQEEEE	1.35	AHT	-0.27	-1.88	0.94	-4	1300.44	PGSGAPGNQE
EPVHLTVSYGPSRSAAPTTLTPAPQ	1.77	AHT	-0.09	-0.33	-0.22	0.5	2578.23	EPVHLTVSYG
ECWRTLEIPHFQP	0.98	AHT	-0.16	-0.72	-0.17	-0.5	1656.08	ECWRTLEIPH
CSAPVKPGIPYKQ	1.81	AHT	-0.12	-0.43	-0.05	2	1387.84	CSAPVKPGIP
SRQLQSPAAPSPQS	1.43	AHT	-0.29	-1.11	0.14	1	1453.76	SRQLQSPAAP
SMCSPPGSPQEGSA	1.05	AHT	-0.12	-0.69	0.11	-1	1334.62	SMCSPPGSPQ
VCEGTSQPEPSCSA	2.05	AHT	-0.14	-0.44	0.19	-2	1394.67	VCEGTSQPEP
SYEALSGGSTSEGFED	1.24	AHT	-0.12	-0.75	0.36	-4	1635.83	SYEALSGGST
LQLTPSPGLSPSLLP	1.69	AHT	0.06	0.37	-0.55	0	1520.03	LQLTPSPGLS
PPGPPGPPGPPGTPVYDS	1.34	AHT	-0.03	-1.01	-0.05	-1	1686.1	PPGPPGPPGP
TPTTSAITASRSESP	1.48	AHT	-0.2	-0.61	0.19	0	1505.79	TPTTSAITAS
MPPPPGSSGPEWKG	1.21	AHT	-0.11	-1.23	0.14	0	1423.8	MPPPPGSSGP
EAEPPAATQPQTSETPTSHLP	1.62	AHT	-0.19	-1.14	0.22	-2.5	2189.61	EAEPPAATQP
QPTEGASVTLSCGTQ	1.45	AHT	-0.1	-0.29	-0.13	-1	1478.81	QPTEGASVTL
GPKPGDSGYETETP	1.56	AHT	-0.24	-1.71	0.66	-2	1434.67	GPKPGDSGYE
SSSKQPAPDTEASE	1.69	AHT	-0.33	-1.53	0.86	-2	1433.62	SSSKQPAPDT
SCPPGFGVLHPGTP	1.88	AHT	0.08	0.07	-0.53	0.5	1365.77	SCPPGFGVLH
KLASPMKPVPGTPPSSKA	1.12	AHT	-0.15	-0.54	0.22	3	1793.4	KLASPMKPVP
PSPVTSTPFSVKD	1.4	AHT	-0.11	-0.37	0.05	0	1361.68	PSPVTSTPFS
PAKPLSNPNSMYL	0.94	AHT	-0.12	-0.56	-0.28	1	1431.85	PAKPLSNPNS
SWEPEDVFSELSIPLGVEFVVP	1.25	AHT	0.07	0.39	-0.18	-5	2476.1	SWEPEDVFSE
TGVSTVPPSSYSL	1.82	AHT	0.02	0.21	-0.52	0	1294.6	TGVSTVPPSS
GPAGGSSPTENSTL	1.32	AHT	-0.09	-0.69	0.07	-1	1274.5	GPAGGSSPTE
LRRQIRSSTTSMT	1.04	AHT	-0.44	-0.87	0.31	3	1536.95	LRRQIRSSTT
PTPKPELTVKQKA	1.68	AHT	-0.3	-1.16	0.58	2	1436.9	PTPKPELTVK
SFFQEAETSEHTAIPL	1.21	AHT	-0.06	-0.27	-0.07	-2.5	1807.17	SFFQEAETSE
RRTSPPPASLAGPSVSSWSFSPS	1.38	AHT	-0.15	-0.48	-0.1	2	2358.89	RRTSPPPASL
CYFPSSPTSPGSQTA	2.36	AHT	-0.08	-0.5	-0.38	0	1529.83	CYFPSSPTSP
SSEGPDGTLAPSDGQSVE	1.1	AHT	-0.16	-0.89	0.51	-4	1732.98	SSEGPDGTLA
AIAPGPEQRPPEDPGQEVPEAEPSQP	1.62	AHT	-0.24	-1.4	0.66	-5	2723.27	AIAPGPEQRP
LEPPETTTVITGLEPYTKYKF	1.06	AHT	-0.1	-0.5	-0.05	-1	2428.09	LEPPETTTVI
TASCSPSPSSGSEGPGQVDS	1.32	AHT	-0.15	-0.72	0.24	-2	1837.12	TASCSPSPSS
TLEEHEAETGMKS	1.19	AHT	-0.26	-1.25	0.8	-2.5	1461.75	TLEEHEAETG
STHPAPSMSSLTSNQS	1.36	AHT	-0.17	-0.76	-0.17	0.5	1631.95	STHPAPSMSS
GPEGKAPHHVLPAHS	1.23	AHT	-0.1	-0.79	0.03	1.5	1533.93	GPEGKAPHHV
EHNDHASTPLLPTPSAATLSPPT	1.26	AHT	-0.1	-0.58	-0.1	-1	2354.88	EHNDHASTPL
SLGDSSSSSPSPSPVDQPY	0.99	AHT	-0.17	-0.89	0.16	-2	1894.18	SLGDSSSSSP
LPGSPMPQVQPPEEG	1.91	AHT	-0.11	-0.91	0.14	-2	1562.98	LPGSPMPQVQ
KPPPQAHLPPAPAP	1.26	AHT	-0.1	-0.9	-0.04	1.5	1417.86	KPPPQAHLPP
GVGEKGEPGEAGNPGPPGEA	1.2	AHT	-0.12	-1.14	0.64	-3	1806.17	GVGEKGEPGE
AWTLTSSSLPAGEPASPTGSPPTP	1.84	AHT	-0.02	-0.36	-0.23	-1	2309.84	AWTLTSSSLP
PGPIGSLGHPGPQGVVGPP	1.83	AHT	0.08	-0.15	-0.35	0.5	1720.26	PGPIGSLGHP
NSSYLWEGFEDEFENYSGTPPTEDY	1.09	AHT	-0.18	-1.39	0.18	-7	2977.36	NSSYLWEGFE
SVPGPSSTVITERVSTATSVTGPSSL	1.31	AHT	-0.05	0.16	-0.15	0	2518.14	SVPGPSSTVI
ELGGGGGGGGGGGGGMGGPPPAPGGGG	0.94	AHT	0.12	-0.37	-0.02	-1	1935.46	ELGGGGGGGG
KGSPSSSKVSQPSDINTFSSVEQPPG	1.15	AHT	-0.21	-0.92	0.28	0	2648.2	KGSPSSSKVS
GSVGPASQLPTVATSLSPASK	1.05	AHT	-0.02	0.14	-0.2	1	1955.49	GSVGPASQLP
PKKPPLGDGSGPGAEPGG	1.15	AHT	-0.13	-1.13	0.56	0	1618.04	PKKPPLGDGS
TPAGVNLSGLLPSGGLLPN	1.02	AHT	0.1	0.49	-0.55	0	1777.35	TPAGVNLSGL
TVSLPNSLQEVVDPLGKRPNPPPVS	1.39	AHT	-0.15	-0.43	0.07	0	2641.39	TVSLPNSLQE
GSTGPAGQKGDSGLPGPPGPPGPP	1.29	AHT	-0.07	-0.98	0.17	0	2082.61	GSTGPAGQKG
GGSWSLKSQVPPGPTPPLQFHPQ	2.15	AHT	-0.08	-0.77	-0.32	1.5	2443.11	GGSWSLKSQV
SPSLQSSTAALTGGPTTG	1.49	AHT	-0.03	-0.15	-0.27	0	1633	SPSLQSSTAA
LGSRRSPPPSLAKQKQKQAEHIPP	1.23	AHT	-0.36	-1.38	0.52	4.5	2651.42	LGSRRSPPPS
TLGKGSIPPGPVPEGV	1.71	AHT	0.03	-0.01	-0.04	0	1504.99	TLGKGSIPPG
ASLIPPSLDPSLTV	1.03	AHT	0.09	0.75	-0.41	-1	1409.84	ASLIPPSLDP
HYDLKQPAQPPPPPTPEAAKPEAAASSG	1.46	AHT	-0.18	-1.1	0.29	-0.5	2853.52	HYDLKQPAQP
SPSEAFGNHHSPS	1.08	AHT	-0.17	-1.2	0.03	0	1353.54	SPSEAFGNHH
PCPVPPAGPLPGPRYR	1.62	AHT	-0.14	-0.62	-0.07	2	1674.21	PCPVPPAGPL
PLYGHGECKWPGCE	1.17	AHT	-0.1	-0.85	-0.07	-0.5	1575.98	PLYGHGECKW
PADVEFIQPPGSLPSEVLQ	1.52	AHT	-0.01	-0.04	-0.07	-3	2023.55	PADVEFIQPP
HPMEDVSISGTPSSSQCP	1.18	AHT	-0.13	-0.58	0.07	-1.5	1859.26	HPMEDVSISG
LVIPPAVAPGLQEGPRP	1.51	AHT	0.02	0.22	-0.19	0	1711.29	LVIPPAVAPG
FFQHPQPQFPYLHP	1.45	AHT	-0.05	-0.89	-0.86	1	1783.23	FFQHPQPQFP
CCRPPEPPGAKSPPPGGGCVT	1.49	AHT	-0.14	-0.6	0.19	1	2007.61	CCRPPEPPGA
TPVGPAPSTSQSQKRSSGLQSGHSSQRA	1.31	AHT	-0.3	-1.15	0.24	3.5	2824.42	TPVGPAPSTS
PGEEPTLMSPGTSCGSL	1.36	AHT	-0.04	-0.28	0.01	-2	1663.09	PGEEPTLMSP
LASTSDSLPPSTGCLG	1.28	AHT	0	0.22	-0.22	-1	1505.88	LASTSDSLPP
LNPIPQAPLPPGW	1.53	AHT	0.07	-0.18	-0.68	0	1399.85	LNPIPQAPLP
NQVLPLTSSSGNS	1.06	AHT	-0.12	-0.35	-0.28	0	1303.58	NQVLPLTSSS
TSENLENPPQLGEE	1.36	AHT	-0.27	-1.57	0.64	-4	1556.81	TSENLENPPQ
RVPGLSPPGSVQSHPG	1.61	AHT	-0.11	-0.56	-0.08	1.5	1571.99	RVPGLSPPGS
GPVPGSPVMSGYYGV	1.08	AHT	0.12	0.26	-0.65	0	1466.89	GPVPGSPVMS
HLEPPSSGSPLLSQL	1.65	AHT	-0.05	-0.23	-0.22	-0.5	1561.98	HLEPPSSGSP
EEPKSEEATADHPV	1.02	AHT	-0.3	-1.54	1.06	-3.5	1538.77	EEPKSEEATA
PYSPPGPGPAPPAAMA	0.96	AHT	0.05	-0.31	-0.33	0	1477.9	PYSPPGPGPA
REAPPGEPGPRKGYS	1.24	AHT	-0.38	-1.85	0.83	1	1597.95	REAPPGEPGP
ASSLDPESQCILEKS	1.03	AHT	-0.19	-0.42	0.43	-2	1606.97	ASSLDPESQC
VKPKSPEPEATLTFPFLDKMPE	1.49	AHT	-0.16	-0.67	0.39	-1	2502.23	VKPKSPEPEA
THREKKESTPSTASLPSYDS	1.82	AHT	-0.37	-1.55	0.66	0.5	2221.63	THREKKESTP
CPYSLSPSEASRGGVMEKES	0.99	AHT	-0.21	-0.7	0.4	-1	2114.6	CPYSLSPSEA
PQLSGVPGASELESL	1.34	AHT	-0.01	0.03	-0.02	-2	1483.86	PQLSGVPGAS
KVPGEGLPLPKTPEKRG	1.34	AHT	-0.28	-1.16	0.74	2	1803.39	KVPGEGLPLP
PPGSPGPKGSPGFPGIPGPP	1.23	AHT	0	-0.75	-0.04	1	1797.33	PPGSPGPKGS
CPEEESIIMSSFV	1.16	AHT	0.02	0.45	0	-3	1470.85	CPEEESIIMS
AQGDAAPQTSGVLASGSLGPPHPPVPR	0.94	AHT	-0.07	-0.34	-0.08	0.5	2565.23	AQGDAAPQTS
GSRVPDMGPWLTPPY	0.95	AHT	-0.08	-0.6	-0.29	0	1673.13	GSRVPDMGPW
AEPEDLQEPLKPDFFL	1.26	AHT	-0.14	-0.68	0.46	-4	1888.33	AEPEDLQEPL
PQPQPQAPSHPAGQSAL	1.41	AHT	-0.15	-1.06	-0.14	0.5	1711.11	PQPQPQAPSH
GPPGSNGPVGEPGPEGPAGNDGTPGR	1.12	AHT	-0.14	-1.24	0.4	-2	2327.79	GPPGSNGPVG
GPPARSASAPLVRSLR	1.01	AHT	-0.23	-0.24	0.21	3	1635.11	GPPARSASAP
TSPPGSTGSTSPGTATSVL	1.84	AHT	-0.03	-0.19	-0.23	0	1705.07	TSPPGSTGST
VFVPPFICK	1.93	AHT	0.2	1.54	-0.87	1	1049.46	VFVPPFICK
PGPSVALGETVT	1.2	AHT	0.07	0.36	-0.23	-1	1127.43	PGPSVALGET
SMGYVQAMKP	0.96	AHT	-0.06	-0.17	-0.34	1	1111.48	SMGYVQAMKP
GGIPPPGQSGLA	1	AHT	0.08	-0.05	-0.3	0	1050.36	GGIPPPGQSG
SFHGPPEPVL	2.01	AHT	0.04	-0.19	-0.3	-0.5	1079.36	SFHGPPEPVL
VGLKSGPVPEP	2.01	AHT	-0.02	-0.15	0.14	0	1079.42	VGLKSGPVPE
SSTLAPANTTAPAPTPAVPLQSG	1.05	AHT	-0.01	0.01	-0.34	0	2149.7	SSTLAPANTT
EKPESRSSIHNFMTHPEFRIEDSEPH	1.28	AHT	-0.34	-1.51	0.64	-1.5	3137.76	EKPESRSSIH
AEPPRGPGPHLGHHT	1.25	AHT	-0.19	-1.35	0.12	1.5	1559.93	AEPPRGPGPH
VTYTLQPSATSVHVQQGPQTMVSS	1.11	AHT	-0.07	-0.16	-0.5	0.5	2547.2	VTYTLQPSAT
GSDPSANSSSVTLETLHQ	1.26	AHT	-0.16	-0.61	0.06	-1.5	1830.15	GSDPSANSSS
KVAAPFSPPPSKPKSPNQAA	1.38	AHT	-0.18	-0.82	0.21	3	2019.59	KVAAPFSPPP
SYPPGPPPAASAL	1.5	AHT	0.05	-0.16	-0.38	0	1224.54	SYPPGPPPAA
AGTVSYNSSSASLEQQ	0.92	AHT	-0.15	-0.55	-0.12	-1	1628.89	AGTVSYNSSS
SHQLRGLFPSTPYS	1.93	AHT	-0.15	-0.63	-0.37	1.5	1589.97	SHQLRGLFPS
PPPPPPPSSVLASGHHT	1.67	AHT	-0.05	-0.66	-0.25	1	1675.11	PPPPPPPSSV
HHLGGGGGGGPGPGGGPS	1.02	AHT	0.06	-0.7	-0.14	1	1411.75	HHLGGGGGGG
KQGAESSVESPKP	1.7	AHT	-0.32	-1.41	0.85	0	1343.63	KQGAESSVES
LEPLPIKVGQSSASQT	1.03	AHT	-0.09	-0.19	-0.03	0	1655.12	LEPLPIKVGQ
GPPTASLGSTPYSSVP	2.19	AHT	0	-0.21	-0.36	0	1517.87	GPPTASLGST
SGRNSMSSLPTHSTSSSYQLDPL	1.14	AHT	-0.21	-0.77	-0.07	0.5	2452.96	SGRNSMSSLP
DHEFILSFSPQEPRD	1.15	AHT	-0.25	-1.07	0.45	-2.5	1817.15	DHEFILSFSP
EGFLPSHSPSPGRK	1.44	AHT	-0.24	-1.18	0.36	1.5	1495.85	EGFLPSHSPS
EGEKNTEESSDSES	1.58	AHT	-0.47	-2.34	1.57	-5	1527.61	EGEKNTEESS
STFHLPPVLSVSGSGSQ	1.23	AHT	0.02	0.2	-0.49	0.5	1700.13	STFHLPPVLS
VGPKGPIGPKGVPGPPGVRGPKGE	1.72	AHT	-0.11	-0.71	0.36	3	2235	VGPKGPIGPK
VHSSGPSKENFGELS	1.01	AHT	-0.17	-0.83	0.27	-0.5	1574.88	VHSSGPSKEN
LELPGSPPALYSEPL	1.94	AHT	0.03	0.02	-0.23	-2	1583.03	LELPGSPPAL
VPPRPNQSPQNPQG	1.61	AHT	-0.36	-1.93	0.2	1	1515.85	VPPRPNQSPQ
HQGPSTGPGTKTENV	1.52	AHT	-0.22	-1.38	0.23	0.5	1509.82	HQGPSTGPGT
PAAPSFSSLLQTAYAS	1.24	AHT	0.04	0.36	-0.59	0	1610.99	PAAPSFSSLL
ERSRPSSRGGRSRSWE	1.16	AHT	-0.67	-2.3	1.19	3	1890.21	ERSRPSSRGG
SSGFYSRLRGTHRPGH	1.08	AHT	-0.34	-1.28	0.12	4	1815.21	SSGFYSRLRG
GHMAPVGHLPPFSHSGHILPTPTPIHPPS	1.32	AHT	0.03	-0.22	-0.53	2.5	3016.92	GHMAPVGHLP
PGLYPPPVSMSPGQPPPQQLLAPTYFSA	2.28	AHT	0.01	-0.27	-0.54	0	2938.8	PGLYPPPVSM
SYTSTTSTPTSTPV	1.62	AHT	-0.12	-0.55	-0.36	0	1429.68	SYTSTTSTPT
PPGPPGHPGPPGIRGPPGL	1.28	AHT	-0.03	-0.85	-0.06	1.5	1754.31	PPGPPGHPGP
QYPSPAKGLGLEPCPP	2.1	AHT	-0.08	-0.62	-0.06	0	1654.14	QYPSPAKGLG
EAQGTGPRQVPPLPLSLSLPEDSSPEPSA	1.98	AHT	-0.15	-0.66	0.23	-3	2957.66	EAQGTGPRQV
SVSGSTPEPPPPDGSPGPKEG	1.68	AHT	-0.17	-1.28	0.54	-2	1976.37	SVSGSTPEPP
GPGGEPGIRLGEVKMEPSP	1.14	AHT	-0.13	-0.72	0.47	-1	1907.46	GPGGEPGIRL
PSSLPRTPALSPPPLSPPVLPPHP	1.52	AHT	-0.05	-0.33	-0.25	1.5	2452.23	PSSLPRTPAL
PPVSPPALTPAPAAGEEGP	1.23	AHT	0.01	-0.28	0.03	-2	1755.21	PPVSPPALTP
DPPTVELQGLVPRG	1.06	AHT	-0.12	-0.38	0.16	-1	1477.89	DPPTVELQGL
LTFHLWEPSQAEGST	1.59	AHT	-0.06	-0.49	-0.3	-1.5	1703.06	LTFHLWEPSQ
HQQHQPPEVPSSEPAAA	1.58	AHT	-0.21	-1.31	0.19	-1	1810.15	HQQHQPPEVP
FPDSDPSWPPKSTEPVCP	1.63	AHT	-0.17	-1.03	0.23	-2	1986.41	FPDSDPSWPP
EGPPDFVPIIPALSRPRPTP	0.93	AHT	-0.11	-0.38	0.1	0	2156.79	EGPPDFVPII
SPSGEPPFSPKSSAE	1.7	AHT	-0.19	-1.14	0.5	-1	1503.77	SPSGEPPFSP
LSAGEGCFSSSQSLE	1.16	AHT	-0.06	-0.04	0.01	-2	1501.79	LSAGEGCFSS
ARGNVPSHSEPQTPAPSSEV	1.46	AHT	-0.22	-1.02	0.29	-0.5	2047.44	ARGNVPSHSE
RRSESHHGQGSHHEQS	1.42	AHT	-0.53	-2.49	0.73	2	1856.1	RRSESHHGQG
EPPSPPAGLPAMESGR	0.96	AHT	-0.14	-0.79	0.34	-1	1593	EPPSPPAGLP
ELEELNVPGEIVESLSSSEESL	1.27	AHT	-0.1	-0.27	0.49	-7	2389.88	ELEELNVPGE
PSVIGPPGPPGPHGPPGPMG	1.29	AHT	0.06	-0.51	-0.24	0.5	1802.38	PSVIGPPGPP
CCSARTSPATTICS	0.91	AHT	-0.13	0.36	-0.22	1	1400.77	CCSARTSPAT
HGGHQPYPRSGHFPWTVPS	2.02	AHT	-0.14	-1.19	-0.41	2.5	2144.62	HGGHQPYPRS
ECPVPTLSWIGNTVSPNEASSRT	1.09	AHT	-0.13	-0.39	-0.09	-1	2446.01	ECPVPTLSWI
AGSLESDGCPKEP	1.08	AHT	-0.2	-0.92	0.72	-2	1289.55	AGSLESDGCP
KGSGFTVTGGTEELPE	0.98	AHT	-0.09	-0.61	0.33	-2	1608.96	KGSGFTVTGG
VASPNQPPPAALEE	1.34	AHT	-0.09	-0.56	0.14	-2	1419.74	VASPNQPPPA
SEAQPPGSAPPGAAPLPCAGP	1	AHT	0	-0.27	-0.07	-1	1872.36	SEAQPPGSAP
SSGSTGKRRSLFRTPS	0.98	AHT	-0.42	-1.16	0.53	4	1724.12	SSGSTGKRRS
PPGPVGSPGERGSAGT	1.17	AHT	-0.11	-0.79	0.26	0	1422.74	PPGPVGSPGE
RPQPGLGRPRERLRV	0.91	AHT	-0.56	-1.55	0.87	4	1787.32	RPQPGLGRPR
QTESQLVPPTSPYT	2.69	AHT	-0.16	-0.88	-0.2	-1	1547.88	QTESQLVPPT
QARPQDQSSPWALP	1.05	AHT	-0.28	-1.31	0.07	0	1580.91	QARPQDQSSP
GSGASSPLTSPSSPTPPSTAGMSAL	1.27	AHT	-0.02	-0.11	-0.21	0	2245.78	GSGASSPLTS
DSDTEQIAEEGDDN	1.05	AHT	-0.38	-1.94	1.36	-7	1537.61	DSDTEQIAEE
DEQTSPSFMSTAWL	1.26	AHT	-0.09	-0.46	-0.23	-2	1599.92	DEQTSPSFMS
PTLPAPLTPRGASP	1.1	AHT	-0.07	-0.28	-0.15	1	1374.79	PTLPAPLTPR
RPVSLATSGGSEEE	1.37	AHT	-0.22	-0.76	0.62	-2	1418.67	RPVSLATSGG
PVEPSHTSLMKRSTSSL	1.23	AHT	-0.22	-0.59	0.16	1.5	1857.35	PVEPSHTSLM
PPGLTATYTGG	0.96	AHT	0.05	-0.2	-0.53	0	1034.29	PPGLTATYTG
LYPSIVIAYN	0.99	AHT	0.18	1.03	-1.15	0	1152.5	LYPSIVIAYN
ATLFLPPGSGPF	1.72	AHT	0.18	0.66	-0.77	0	1203.57	ATLFLPPGSG
MPLHKVPVGL	0.9	AHT	0.09	0.72	-0.54	1.5	1090.55	MPLHKVPVGL
LSYKKPGIHLSPGEFHKE	0.91	AHT	-0.18	-0.95	0.24	2	2067.65	LSYKKPGIHL
TWTYSLLNNHASPQL	1.09	AHT	-0.07	-0.49	-0.78	0.5	1745.15	TWTYSLLNNH
EPRYGNGSEPSEIPASKEPV	1.63	AHT	-0.26	-1.32	0.65	-2	2143.57	EPRYGNGSEP
HSPPHAQFTYQQPQP	1.87	AHT	-0.23	-1.67	-0.37	1	1763.12	HSPPHAQFTY
VPLCDEPGSGLWT	0.96	AHT	0.03	0.07	-0.28	-2	1373.73	VPLCDEPGSG
KKCPFQDQPEAYGSDFWE	1.17	AHT	-0.26	-1.42	0.36	-2	2175.6	KKCPFQDQPE
PEFVAPEIVNQTPV	0.94	AHT	0.02	0.16	-0.24	-2	1539.95	PEFVAPEIVN
ETPQSSASSATPGILA	1.22	AHT	-0.04	-0.09	-0.09	-1	1516.84	ETPQSSASSA
EEPNLVPQGASHPGS	1.79	AHT	-0.14	-0.97	0.18	-1.5	1518.82	EEPNLVPQGA
GHPGGQSSPGTSQHPP	1.56	AHT	-0.17	-1.53	-0.01	1	1527.81	GHPGGQSSPG
PPPPPPPQAPPGQPAK	1.01	AHT	-0.16	-1.48	0.15	1	1573.04	PPPPPPPQAP
QPSTPKTPRALSPA	1.65	AHT	-0.26	-0.99	0.23	2	1450.84	QPSTPKTPRA
EPGLLGPPGLLGPPGPLGPS	1.52	AHT	0.11	0.05	-0.29	-1	1822.45	EPGLLGPPGL
QDSQHTPHSMTPSNATVPRSSTPS	1.61	AHT	-0.28	-1.29	0.1	1	2551.03	QDSQHTPHSM
YVVLEPTDQDGPDNGPP	1.1	AHT	-0.15	-1.06	0.29	-4	1813.15	YVVLEPTDQD
EEKKQPDEEPMDMV	1.63	AHT	-0.42	-1.96	1.44	-4	1705.08	EEKKQPDEEP
EGPWAGTVPLVPTSYPL	1.97	AHT	0.09	0.16	-0.61	-1	1784.29	EGPWAGTVPL
EAHGTSAGPQPPAEPEGEATTQQSGRSAP	0.92	AHT	-0.22	-1.29	0.42	-2.5	2846.34	EAHGTSAGPQ
APPSSGESAPPGSEEVARPDPGDEAPPP	1.11	AHT	-0.19	-1.18	0.67	-5	2698.17	APPSSGESAP
TSTFFLVSSLAPSSKPT	1.61	AHT	0	0.35	-0.43	1	1770.24	TSTFFLVSSL
LSCTGTSTSASTNSSSGS	1.25	AHT	-0.13	-0.3	-0.13	0	1634.88	LSCTGTSTSA
PSPSVGGPGTPDS	1.23	AHT	-0.07	-0.77	0.15	-1	1154.37	PSPSVGGPGT
VLASASLPSSLPSEGARRLLQP	1.26	AHT	-0.1	0.15	-0.06	1	2249.91	VLASASLPSS
GSGGSTPHISGPGPGRPS	0.91	AHT	-0.11	-0.88	0.08	1.5	1604.96	GSGGSTPHIS
ASTPPALSASPASPARPPSPGAPALHVP	1.12	AHT	-0.03	-0.1	-0.18	1.5	2602.31	ASTPPALSAS
HLIVARKNGYPLPEGLPPTLQP	1.25	AHT	-0.08	-0.33	-0.22	1.5	2411.19	HLIVARKNGY
TPARSGSPPCLSASLQEL	1.65	AHT	-0.12	-0.17	-0.02	0	1814.29	TPARSGSPPC
EGTIMEESSRDKD	1.04	AHT	-0.44	-1.71	1.39	-3	1496.74	EGTIMEESSR
HASEVGPPVPPPSGLRDPLES	1.65	AHT	-0.12	-0.63	0.25	-1.5	2138.66	HASEVGPPVP
YGPAVFPVAPTSSKQ	1.72	AHT	-0.02	-0.09	-0.36	1	1548.96	YGPAVFPVAP
SPGRGASAALSSSPPQPSQ	1.19	AHT	-0.18	-0.75	0.1	1	1782.15	SPGRGASAAL
HRATTPQTQHVSPMRQVEPPS	1.45	AHT	-0.32	-1.3	0.15	2	2384.96	HRATTPQTQH
TSPLPPPTPGVSEP	1.72	AHT	-0.05	-0.61	-0.04	-1	1375.73	TSPLPPPTPG
LKGLPGIPGIPGTPGEKGNVGGPG	1.08	AHT	0.02	-0.26	0	1	2169.9	LKGLPGIPGI
FLLSTYGSTSCTGC	1.44	AHT	0.06	0.63	-0.76	0	1439.81	FLLSTYGSTS
TSGSTHPTSLSLAGDSHHE	1.5	AHT	-0.15	-0.83	0.04	-0.5	1921.24	TSGSTHPTSL
SPSDLPPGSQASSPG	1.17	AHT	-0.13	-0.84	0.16	-1	1383.63	SPSDLPPGSQ
DFSSLSSSDRTPLTSPSPSPS	1.18	AHT	-0.21	-0.77	0.23	-1	2152.52	DFSSLSSSDR
WTLQGVPTVPPGNVHAE	1.17	AHT	0.01	-0.2	-0.48	-0.5	1802.28	WTLQGVPTVP
TWSLWSSTPSALLFP	1.78	AHT	0.11	0.43	-0.99	0	1693.14	TWSLWSSTPS
SFLSSAPSSPSFPSP	1.06	AHT	-0.01	-0.05	-0.35	0	1494.8	SFLSSAPSSP
SNFGVNMQTYTPSLTSQTKT	1.13	AHT	-0.17	-0.72	-0.34	1	2205.72	SNFGVNMQTY
EPPDAPPPPPLGPD	0.92	AHT	-0.12	-1.29	0.48	-3	1395.71	EPPDAPPPPP
PAEPAPEKPSDAGEDSVSED	0.94	AHT	-0.27	-1.4	1.1	-6	2027.29	PAEPAPEKPS
LEYGSESGVCTRGT	0.93	AHT	-0.16	-0.46	0.16	-1	1458.76	LEYGSESGVC
WENPEVFDPLRFSQEC	1.03	AHT	-0.21	-0.89	0.19	-3	1996.4	WENPEVFDPL
ADSSSEFSEETGASSTR	1.37	AHT	-0.29	-1.1	0.74	-3	1747.91	ADSSSEFSEE
TSWALSAWEGPSTSRALGLWESPVSPPS	1.64	AHT	-0.04	-0.26	-0.3	-1	2957.64	TSWALSAWEG
DGMEYPFIGEGEPHVDG	0.9	AHT	-0.06	-0.79	0.3	-4.5	1849.21	DGMEYPFIGE
TPPGNELPAGPAARPPEPPVER	1.04	AHT	-0.21	-1.09	0.45	-1	2249.81	TPPGNELPAG
LPHSSLAMHTPGPTEL	1.05	AHT	-0.02	-0.19	-0.34	0	1688.17	LPHSSLAMHT
TCGPGHTPQDGKCV	1.35	AHT	-0.17	-0.76	0.1	0.5	1399.76	TCGPGHTPQD
GPTLGSQAPPGSQDSP	1.48	AHT	-0.13	-0.97	0.1	-1	1495.79	GPTLGSQAPP
PMVELVQRPEPCTPPEIPLGIPGS	1.47	AHT	-0.04	-0.11	-0.02	-2	2557.38	PMVELVQRPE
ELVTGSSCESPPPDFRGQWINLPV	1.13	AHT	-0.09	-0.31	-0.1	-2	2629.29	ELVTGSSCES
EEQVKQESMQGKKSSSLVDIREEESEGGS	1.12	AHT	-0.37	-1.45	1.05	-4	3211.85	EEQVKQESMQ
HPKTSGLMEKPGVEPSKEDD	1.07	AHT	-0.31	-1.52	0.96	-1.5	2181.69	HPKTSGLMEK
GGLPGHIGSPGIPGV	1.08	AHT	0.17	0.39	-0.47	0.5	1314.75	GGLPGHIGSP
SSEILLTPRPQDH	1.1	AHT	-0.25	-0.89	0.27	-0.5	1492.84	SSEILLTPRP
RTAAQRNLSPTPAGSSQGPPLQL	0.96	AHT	-0.22	-0.75	0	2	2347.95	RTAAQRNLSP
LPKCKTIKNRPPPPRKH	1.22	AHT	-0.48	-1.72	0.75	6.5	2010.72	LPKCKTIKNR
PFPGKGPAPGSGSGGGDGPE	1.04	AHT	-0.06	-0.96	0.33	-1	1725.09	PFPGKGPAPG
SPGRGASAALSSSPPQPSQG	1.03	AHT	-0.16	-0.74	0.09	1	1839.22	SPGRGASAAL
GPGGTPGPPVRMGPAPGQG	1.16	AHT	-0.05	-0.69	-0.03	1	1687.19	GPGGTPGPPV
RRPSYSSSLFGYSPTAAAGAPALL	0.96	AHT	-0.06	0.05	-0.33	2	2441.06	RRPSYSSSLF
LVPPLVPQWPAKGLTQEPTRLPQ	1.67	AHT	-0.1	-0.4	-0.23	1	2566.4	LVPPLVPQWP
FTHSPYSWSDSSDPLFLSVT	1.27	AHT	-0.03	-0.22	-0.46	-1.5	2273.71	FTHSPYSWSD
LQESLLEEDSEEEGDLCR	1.03	AHT	-0.32	-1.13	1.09	-7	2094.45	LQESLLEEDS
KGEPGDCGLPGPPGLPGPP	1.44	AHT	-0.05	-0.76	0.23	-1	1742.26	KGEPGDCGLP
QRPLEPGTPHWANYVKGV	1.17	AHT	-0.17	-0.92	-0.14	1.5	2049.59	QRPLEPGTPH
GPPGPPGGPGMPPGGRGRGRGQG	1.13	AHT	-0.19	-1.33	0.34	3	2053.64	GPPGPPGGPG
TPPRQGHAAWPRGSSLSESSEGY	1.59	AHT	-0.25	-1.23	0.19	0.5	2457.92	TPPRQGHAAW
EGSFHLTPNEVSVH	1.19	AHT	-0.08	-0.44	-0.14	-1	1552.87	EGSFHLTPNE
PQSLVSNLDPGAALYLYRGPSAPP	1.51	AHT	-0.05	-0.17	-0.31	0	2484.15	PQSLVSNLDP
GPQDHPPGSAPATTFP	1.08	AHT	-0.08	-0.92	-0.08	-0.5	1576.9	GPQDHPPGSA
KTGPKEEENGQGHP	1.68	AHT	-0.4	-2.4	1.04	-0.5	1507.79	KTGPKEEENG
SVSLPQIGHTHPGPSAGPE	1.72	AHT	-0.04	-0.52	-0.15	0	1868.32	SVSLPQIGHT
LGSGLPPPGMPPPGSFPPPVPPP	1.27	AHT	0.08	-0.26	-0.36	0	2189.93	LGSGLPPPGM
EPPQLAGPEAPEPTG	1.4	AHT	-0.12	-1.07	0.4	-3	1489.81	EPPQLAGPEA
APPGPGHRHGPGYGK	1.29	AHT	-0.19	-1.51	0.15	3	1484.86	APPGPGHRHG
QCSPNPPPAKKVPGSQLFAS	1.71	AHT	-0.15	-0.61	-0.01	2	2053.64	QCSPNPPPAK
KVPPTLPAPLTPRGASPAAS	1.15	AHT	-0.07	-0.12	-0.06	2	1928.53	KVPPTLPAPL
DSTDVGEEDSFLGQT	1.05	AHT	-0.2	-0.93	0.61	-5	1599.79	DSTDVGEEDS
PPLPGSPYGAPTPASYATA	1.52	AHT	0.03	-0.26	-0.45	0	1815.26	PPLPGSPYGA
KEKPNVGCMEFKSEF	1.1	AHT	-0.26	-0.95	0.65	0	1773.26	KEKPNVGCME
LISRSQASSSTSGSITQQT	1.25	AHT	-0.2	-0.45	-0.07	1	1939.34	LISRSQASSS
PSERPPPPVRDPPGRSGP	1.02	AHT	-0.38	-1.75	0.78	1	1895.34	PSERPPPPVR
TPVHTQPPGTPLSQTA	1.94	AHT	-0.1	-0.67	-0.33	0.5	1632.04	TPVHTQPPGT
VSCTAPLCSPWLTTS	1.84	AHT	0.06	0.67	-0.75	0	1566.02	VSCTAPLCSP
QKPLTSSATSPSSRLPGL	1.76	AHT	-0.19	-0.52	0.06	2	1827.32	QKPLTSSATS
SSTWGVSPPAPAPRPPDPDVVL	1.09	AHT	-0.07	-0.32	-0.05	-1	2242.81	SSTWGVSPPA
LASTPTTTTASASMPESPSSS	1.64	AHT	-0.1	-0.3	-0.07	-1	2011.41	LASTPTTTTA
PAAPAPPSPSGCQ	1.14	AHT	-0.05	-0.43	-0.13	0	1179.47	PAAPAPPSPS
VNEINESCGSSTNLPPSTQ	1.48	AHT	-0.18	-0.75	0.06	-2	1977.36	VNEINESCGS
SSHLEPEPSSQHCRQRSGSL	1.72	AHT	-0.37	-1.39	0.43	1	2222.66	SSHLEPEPSS
LPGRSPSSPPPVTSLLTHG	1.98	AHT	-0.08	-0.29	-0.21	1.5	1900.44	LPGRSPSSPP
RTPPEAIALCSSLLEYTPSSR	1.41	AHT	-0.17	-0.22	0.04	0	2291.89	RTPPEAIALC
FWYLHGRRGRR	1.03	AHT	-0.51	-1.6	0.14	4.5	1503.89	FWYLHGRRGR
PSSGVNGNMQP	1.01	AHT	-0.14	-0.91	-0.15	0	1087.33	PSSGVNGNMQ
LIGPAEPIPHK	1.24	AHT	0.01	-0.11	-0.04	0.5	1171.57	LIGPAEPIPH
LPGGFPYGSEV	1.85	AHT	0.11	0.07	-0.44	-1	1122.4	LPGGFPYGSE
HFGQMPACTPKE	0.93	AHT	-0.15	-0.78	0	0.5	1345.72	HFGQMPACTP
KLYRREIHPPF	1.06	AHT	-0.35	-1.18	0.28	2.5	1455.88	KLYRREIHPP
PGPPGLLAHPE	1.22	AHT	0.03	-0.41	-0.15	-0.5	1084.4	PGPPGLLAHP
DAEQEPPQSPPGSRARLPQE	1.42	AHT	-0.39	-1.81	0.82	-2	2189.6	DAEQEPPQSP
ARPTNRTALSDPSSRLSTSP	1.23	AHT	-0.36	-1.01	0.39	2	2114.56	ARPTNRTALS
SGSGHTGSDLEAFSEQ	1.04	AHT	-0.15	-0.87	0.29	-2.5	1608.82	SGSGHTGSDL
TSDWSISSLSTFTSR	1.1	AHT	-0.16	-0.31	-0.19	0	1674.98	TSDWSISSLS
PSPPGLSGDAGRPAPPSRGSSYRL	1.03	AHT	-0.23	-0.93	0.27	2	2379.94	PSPPGLSGDA
TSYSTPGMSGYSSG	1.02	AHT	-0.07	-0.64	-0.37	0	1381.62	TSYSTPGMSG
QPPPRMKPTPLTPSPPGVP	1.43	AHT	-0.17	-1	0.06	2	1994.65	QPPPRMKPTP
ESEHGSPLTPRVGIPSGLGAECP	1.3	AHT	-0.09	-0.38	0.16	-1.5	2290.87	ESEHGSPLTP
LASLGYGGPPPPPWNVQS	2.11	AHT	0.03	-0.36	-0.57	0	1837.33	LASLGYGGPP
SPTALPGSKTNSP	1.84	AHT	-0.17	-0.83	0.08	1	1256.55	SPTALPGSKT
QPEEGMSPRALNSPPLPRAV	0.98	AHT	-0.22	-0.79	0.28	0	2146.73	QPEEGMSPRA
VYSWPPPEEVHSQG	2.23	AHT	-0.1	-1.02	-0.17	-1.5	1611.93	VYSWPPPEEV
AQPVSTPSTSSHFPPSPLL	2.27	AHT	-0.03	-0.19	-0.41	0.5	1950.44	AQPVSTPSTS
ERSQVPSTEGPPRS	1.81	AHT	-0.42	-1.69	0.8	0	1526.81	ERSQVPSTEG
YFCGDPSPLGDVFP	0.96	AHT	0.05	0.1	-0.38	-2	1513.87	YFCGDPSPLG
SSGQSAQLLSHEPGD	0.91	AHT	-0.17	-0.89	0.2	-1.5	1512.77	SSGQSAQLLS
PGGSRHARPQLLPRS	1.14	AHT	-0.36	-1.2	0.35	3.5	1629.07	PGGSRHARPQ
TPTSVMGPSSTVTT	1.27	AHT	-0.02	0.06	-0.39	0	1365.71	TPTSVMGPSS
SSSSTSSSPSPAKPGPQALPKPASP	1.39	AHT	-0.18	-0.86	0.21	2	2350.89	SSSSTSSSPS
TEPMSSSEIVSTTADGS	1.2	AHT	-0.11	-0.36	0.25	-3	1699	TEPMSSSEIV
GPKFLSKVEETFQC	1.26	AHT	-0.15	-0.41	0.2	0	1613.06	GPKFLSKVEE
ERESWEPVKSLTSNLP	1.44	AHT	-0.28	-1.11	0.45	-1	1872.29	ERESWEPVKS
SPEQELPAATAAPPPRVPRSAS	1.05	AHT	-0.2	-0.69	0.31	0	2229.76	SPEQELPAAT
QGTKAVGGSQPQP	1.01	AHT	-0.19	-1.1	0.12	1	1254.56	QGTKAVGGSQ
EPELLLSEGPGAPQP	1.73	AHT	-0.06	-0.59	0.24	-3	1533.92	EPELLLSEGP
PGPKGARGPQGPSGPPGA	1.12	AHT	-0.15	-1.17	0.31	2	1585.01	PGPKGARGPQ
LGQPDLPKEMASLSVETQSTSSE	1.36	AHT	-0.18	-0.63	0.32	-3	2434.99	LGQPDLPKEM
VPIPEVKPDTVSEP	1.09	AHT	-0.1	-0.37	0.4	-2	1506.91	VPIPEVKPDT
KCYAEGPGSNQGPE	1.06	AHT	-0.23	-1.44	0.42	-1	1436.71	KCYAEGPGSN
APTSEWSGKQGYL	1.01	AHT	-0.13	-0.94	-0.12	0	1423.73	APTSEWSGKQ
PKQGLNNSPPVKEL	1.46	AHT	-0.25	-1.14	0.34	1	1520.96	PKQGLNNSPP
ASTPPRPRTQPSASSLA	1.53	AHT	-0.27	-0.84	0.19	2	1724.12	ASTPPRPRTQ
WLSPTTTPTQIPTACGGFLTQ	1.04	AHT	0.02	0.03	-0.69	0	2220.84	WLSPTTTPTQ
GGSSQGYFPGPPSGP	1.18	AHT	-0.02	-0.85	-0.25	0	1391.67	GGSSQGYFPG
CQPPPAVPQAEML	1.35	AHT	-0.03	-0.07	-0.25	-1	1380.82	CQPPPAVPQA
LASTSASSLTLSSAL	0.99	AHT	0.06	0.96	-0.51	0	1408.77	LASTSASSLT
LASSETDDCDCEEVPQCCSPSPRS	1.12	AHT	-0.28	-0.78	0.6	-5	2559.02	LASSETDDCD
GTCLSLSQGQGTC	0.97	AHT	-0.05	0.11	-0.42	0	1254.59	GTCLSLSQGQ
PPAATSKQPGTGPDGS	0.95	AHT	-0.17	-1.12	0.31	0	1467.77	PPAATSKQPG
EFVPPVPPPPYYP	1.48	AHT	0.05	-0.47	-0.55	-1	1498.91	EFVPPVPPPP
QREEGPQDGSLSAFS	1	AHT	-0.28	-1.23	0.57	-2	1607.86	QREEGPQDGS
EEEVTKEKEPPKQGKEK	1.82	AHT	-0.56	-2.59	1.84	-1	2013.48	EEEVTKEKEP
GQSEPLTGVFTTEEVPAQQYL	1.16	AHT	-0.07	-0.41	-0.15	-3	2294.82	GQSEPLTGVF
GLEVKVKDPPKGMIPPGT	0.93	AHT	-0.11	-0.47	0.37	1	1863.52	GLEVKVKDPP
TYCLPSSSGQANG	1.23	AHT	-0.09	-0.44	-0.36	0	1284.54	TYCLPSSSGQ
RKTMSKPGNGQPPVPEKRPPE	1.52	AHT	-0.43	-1.93	0.88	3	2330.99	RKTMSKPGNG
PEPLAEPEPGAREPPPPTKE	1.27	AHT	-0.28	-1.62	0.89	-3	2138.63	PEPLAEPEPG
HTTTSPTHTVASPTHATASP	1.14	AHT	-0.11	-0.6	-0.32	1.5	2002.4	HTTTSPTHTV
PSEVSGESLEIDFQVTEP	1.89	AHT	-0.1	-0.46	0.37	-5	1963.34	PSEVSGESLE
PGLPGAPGQGGAPGPPGLPGPA	1.25	AHT	0.08	-0.3	-0.22	0	1819.38	PGLPGAPGQG
TAPRVPRHYISCS	1.04	AHT	-0.24	-0.46	-0.11	2.5	1486.88	TAPRVPRHYI
PTMNSPGPTTASK	0.91	AHT	-0.18	-0.97	0.06	1	1288.61	PTMNSPGPTT
SFCTSAIQRPPTAPPEHQLQ	1.38	AHT	-0.18	-0.69	-0.11	0.5	2208.76	SFCTSAIQRP
LYKSLLSLSPELPSDLGETES	1.27	AHT	-0.09	-0.22	0.14	-3	2278.85	LYKSLLSLSP
TTPKPVINSTPGRT	1.05	AHT	-0.23	-0.86	0.11	2	1468.87	TTPKPVINST
NPPMTQQPVRTQVPGPPQPPL	1.75	AHT	-0.19	-1.07	-0.14	1	2279.96	NPPMTQQPVR
SASAHPKSASGQSRSATVYPKP	0.96	AHT	-0.24	-0.89	0.2	3.5	2214.71	SASAHPKSAS
PAPSKGPPKIVFSDASKEAGP	0.94	AHT	-0.13	-0.62	0.41	1	2080.65	PAPSKGPPKI
PGAPGGSGAPAPQY	0.97	AHT	0.01	-0.59	-0.24	0	1226.5	PGAPGGSGAP
QASPSSPAPGPPPGAPR	1.11	AHT	-0.16	-1	0.15	1	1570.94	QASPSSPAPG
LADGPEEQPHAAPPES	1.19	AHT	-0.17	-1.19	0.54	-3.5	1644.93	LADGPEEQPH
PFPQPDPQRPLMPGHS	1.23	AHT	-0.21	-1.28	0.04	0.5	1801.28	PFPQPDPQRP
EVHKFEENEEPMETDQN	1.01	AHT	-0.4	-2.09	1.08	-5.5	2105.42	EVHKFEENEE
PVPGSPGGQKWVSRW	1.2	AHT	-0.13	-0.86	-0.2	2	1638.08	PVPGSPGGQK
LQHPWVQGQAPERGLPT	1.02	AHT	-0.16	-0.9	-0.19	0.5	1914.42	LQHPWVQGQA
QGGRCSPVPGLSSSP	1.26	AHT	-0.14	-0.45	0.01	1	1428.79	QGGRCSPVPG
KPPPSPVTHALKDGEIAPA	0.92	AHT	-0.11	-0.53	0.25	0.5	1925.48	KPPPSPVTHA
GPPGKLGSLGSPGLPGLPGPPGLPGMK	1.11	AHT	0.04	-0.18	-0.14	2	2436.34	GPPGKLGSLG
SEPEDDSPGSVTPPSSG	1.37	AHT	-0.21	-1.28	0.68	-4	1644.84	SEPEDDSPGS
FPSPSGPASPCSL	1.41	AHT	0.02	0.07	-0.35	0	1246.56	FPSPSGPASP
TCEDCVGHPQGKG	1.11	AHT	-0.21	-0.92	0.37	-0.5	1330.64	TCEDCVGHPQ
NFCPMQPASPGQPLSPL	1.24	AHT	-0.03	-0.23	-0.45	0	1784.32	NFCPMQPASP
SAPIVGYPSPPGGFTGTPPG	1.48	AHT	0.08	-0.13	-0.44	0	1856.35	SAPIVGYPSP
TSNLPQLQALSSSTSSVDSMVSSET	1.09	AHT	-0.13	-0.2	-0.08	-2	2557.09	TSNLPQLQAL
LTLHASESADSQES	1.32	AHT	-0.19	-0.71	0.35	-2.5	1474.69	LTLHASESAD
TVERDQPLPTPEPQ	1.34	AHT	-0.33	-1.56	0.59	-2	1606.95	TVERDQPLPT
PEEPGDSPPLRHRPR	0.94	AHT	-0.5	-2.17	1.07	0.5	1740.11	PEEPGDSPPL
ASPLPSPPVAASLPPPPVAASLP	1.45	AHT	0.1	0.49	-0.42	0	2133.82	ASPLPSPPVA
GEEPVVSPFMDSEHDIPPTVTP	1.08	AHT	-0.07	-0.47	0.19	-4.5	2380.92	GEEPVVSPFM
DISEGGSETDDSSQT	1.55	AHT	-0.3	-1.46	0.92	-5	1527.63	DISEGGSETD
FSRHHPSLPASHSGS	0.96	AHT	-0.19	-0.89	-0.12	2.5	1603.92	FSRHHPSLPA
DRGEPEPMEVEEGELEV	1.06	AHT	-0.28	-1.32	1.23	-7	1944.3	DRGEPEPMEV
SQEPLISSEPTLSRGALTTR	1.62	AHT	-0.22	-0.53	0.23	0	2143.67	SQEPLISSEP
PGPQGPSGDPGPPGPPGKDGLPGPQ	1.36	AHT	-0.12	-1.36	0.32	-1	2260.82	PGPQGPSGDP
KSKGARQGQHSSQHHGHSPLEQH	0.95	AHT	-0.4	-2.01	0.4	4.5	2559.08	KSKGARQGQH
PTSAYYSRQSSSLY	1.83	AHT	-0.23	-0.9	-0.35	1	1609.89	PTSAYYSRQS
RTPPSPGAPASPTS	1.12	AHT	-0.18	-0.94	0.15	1	1322.61	RTPPSPGAPA
TQEPTLGAGDPSPSALETGP	1.2	AHT	-0.1	-0.71	0.2	-3	1925.32	TQEPTLGAGD
VPGGGPLLPAAGRELPPEEE	1.22	AHT	-0.07	-0.45	0.36	-3	1985.52	VPGGGPLLPA
SPCQSGQKPCGSGGR	0.93	AHT	-0.3	-1.17	0.35	2	1448.8	SPCQSGQKPC
TTGAPQAPGAGPLQLSPASP	1.01	AHT	0	-0.22	-0.27	0	1818.3	TTGAPQAPGA
GVEPPGSKGKREAEGS	1.11	AHT	-0.32	-1.45	1.04	0	1584.93	GVEPPGSKGK
APPAQSPSVDQEP	1.55	AHT	-0.19	-1.09	0.35	-2	1322.56	APPAQSPSVD
LPAESSSVSLFPSPA	1.64	AHT	0.04	0.39	-0.27	-1	1488.85	LPAESSSVSL
PRPDPPAPAPLAPLEPDSGTS	0.97	AHT	-0.15	-0.83	0.34	-2	2082.57	PRPDPPAPAP
QYKQRMPSVTHSPE	1.63	AHT	-0.38	-1.63	0.29	1.5	1688.09	QYKQRMPSVT
EVEAPPKPTRTSDPQPRSK	1.44	AHT	-0.46	-1.88	1	1	2120.6	EVEAPPKPTR
GHHPPVSIGQPQNQ	1.44	AHT	-0.17	-1.29	-0.23	1	1495.84	GHHPPVSIGQ
PKPEPPSPEETVSSEPM	1.7	AHT	-0.24	-1.44	0.75	-3	1838.24	PKPEPPSPEE
EPKEGETEGEAGPEKKGPEPG	1.61	AHT	-0.34	-2.07	1.39	-4	2152.56	EPKEGETEGE
GGSIDSGNFPPSEPPTGG	0.92	AHT	-0.06	-0.82	0.13	-2	1672.98	GGSIDSGNFP
FAPPSQASLAPTPVA	1.08	AHT	0.07	0.39	-0.49	0	1453.85	FAPPSQASLA
GHPASLPPAHSQTHPKTSMRT	1.3	AHT	-0.23	-1.12	0.01	3.5	2238.81	GHPASLPPAH
SGPPAGGHHQPLHQSP	1.48	AHT	-0.13	-1.26	-0.17	1.5	1603.96	SGPPAGGHHQ
SAECSSDDEDFVECEPSTARSS	0.91	AHT	-0.29	-0.93	0.84	-6	2351.63	SAECSSDDED
RPASVNGSPSTTSESDGSSTGSLPP	1.47	AHT	-0.19	-0.85	0.26	-1	2375.78	RPASVNGSPS
VPPHRRQTSSTTAFQQPSQTHR	1.7	AHT	-0.42	-1.6	0.16	4	2548.09	VPPHRRQTSS
QVGVGQLWPLPGFTTPVF	1.25	AHT	0.16	0.58	-0.94	0	1943.56	QVGVGQLWPL
AHTVLPQDGQVLPTSLPSTLAPPTM	1.11	AHT	0	0.1	-0.42	-0.5	2572.35	AHTVLPQDGQ
SLTHTGPAKQPPIPP	1.8	AHT	-0.1	-0.74	-0.13	1.5	1541	SLTHTGPAKQ
HHSAESLSPSAAQQASSSSPKLSETSRSF	1.31	AHT	-0.23	-0.82	0.21	1	3002.55	HHSAESLSPS
VRGPCQHELQPPPGG	1.88	AHT	-0.19	-1.02	0.11	0.5	1572	VRGPCQHELQ
EVALSWKPGESEGSSPIQY	1.59	AHT	-0.11	-0.68	0.11	-2	2064.51	EVALSWKPGE
TPSFTSCSSSHSPP	1.53	AHT	-0.13	-0.64	-0.21	0.5	1421.67	TPSFTSCSSS
PSGHMPSLPSVSGTSSGLAQEPVL	1.17	AHT	0	0.01	-0.25	-0.5	2335.97	PSGHMPSLPS
KGAHRERQETHGHK	0.94	AHT	-0.6	-2.61	1.13	3.5	1671.02	KGAHRERQET
APPAPGPQVGPGSDVRDP	1.08	AHT	-0.14	-0.81	0.31	-1	1714.11	APPAPGPQVG
SAKPKTSDGKSPTSPTS	1.24	AHT	-0.33	-1.45	0.69	2	1676.03	SAKPKTSDGK
EKSHEETDSTKEE	1.85	AHT	-0.56	-2.69	1.79	-3.5	1548.71	EKSHEETDST
VLYLYPTHKSPEALL	1.12	AHT	0.02	0.22	-0.56	0.5	1744.29	VLYLYPTHKS
VTHLYNHSSSEITSLYY	1.24	AHT	-0.06	-0.33	-0.66	0	2014.43	VTHLYNHSSS
DPQMPMSHPYSMPTPYPSL	1.04	AHT	-0.1	-0.84	-0.37	-0.5	2176.77	DPQMPMSHPY
ELLRHLAPGGPPSAS	0.98	AHT	-0.07	-0.23	-0.02	0.5	1501.92	ELLRHLAPGG
AQSTLPTTSMSMSG	0.94	AHT	-0.06	-0.1	-0.34	0	1398.76	AQSTLPTTSM
PPAPYPAPAGSYPTP	1.39	AHT	0	-0.69	-0.41	0	1482.84	PPAPYPAPAG
LLGTPSSLGELHSLR	0.96	AHT	-0.06	0.15	-0.2	0.5	1580.05	LLGTPSSLGE
KTSKGPRSSSGHPTKS	0.94	AHT	-0.43	-1.8	0.76	4.5	1642.02	KTSKGPRSSS
APQSSAPVVWMPMPTPIPHC	1.03	AHT	0.05	0.17	-0.65	0.5	2146.85	APQSSAPVVW
MPGPHGGPGGPGGPVGP	1.25	AHT	0.07	-0.58	-0.19	0.5	1424.86	MPGPHGGPGG
SPREEPSSPLDSSGPRL	1.44	AHT	-0.34	-1.34	0.76	-1	1811.16	SPREEPSSPL
PGGGPGSCGGPGGGGGPGGGGGPAGGPRP	1.1	AHT	0.02	-0.67	0.06	1	2142.7	PGGGPGSCGG
EYTSSSGAGQYQCA	1.08	AHT	-0.15	-0.78	-0.19	-1	1451.67	EYTSSSGAGQ
PPGSAGGPAPFD	1.22	AHT	0.03	-0.46	-0.02	-1	1069.29	PPGSAGGPAP
GLGGPGSPPAAP	1.5	AHT	0.09	-0.12	-0.21	0	977.25	GLGGPGSPPA
GPLQAIPEMD	1.22	AHT	-0.02	-0.21	0.08	-2	1070.37	GPLQAIPEMD
GVGPGPGPYAA	1.57	AHT	0.14	0.01	-0.44	0	942.19	GVGPGPGPYA
LPGLNSPSLPGF	1.28	AHT	0.1	0.29	-0.59	0	1198.56	LPGLNSPSLP
YDPAEGPGSPS	1.05	AHT	-0.13	-1.25	0.35	-2	1076.22	YDPAEGPGSP
LIEIPNVPQE	0.94	AHT	-0.02	-0.02	-0.05	-2	1151.48	LIEIPNVPQE
PGDEWMQELDEL	1.01	AHT	-0.18	-1.2	0.57	-5	1461.74	PGDEWMQELD
MGDPERPEA	1.25	AHT	-0.35	-1.66	1.13	-2	1001.19	MGDPERPEA
TPGIPGPLGHQ	0.95	AHT	0.02	-0.46	-0.39	0.5	1073.39	TPGIPGPLGH
SPQGAGGSPPGA	1.47	AHT	-0.02	-0.66	-0.02	0	982.18	SPQGAGGSPP
PQEVPALEVKKEE	1.38	AHT	-0.28	-1.12	0.99	-2	1495.88	PQEVPALEVK
LHSASVLSNPHHCP	0.93	AHT	-0.06	-0.19	-0.5	1.5	1498.88	LHSASVLSNP
SASPPPAASKPLGLVVPPSPP	1.65	AHT	0.02	0.05	-0.19	1	1966.59	SASPPPAASK
HKLVQLSVLVPPTFRQAPSRP	1.14	AHT	-0.16	-0.15	-0.18	3.5	2371.14	HKLVQLSVLV
KKPLKKKPTPVPLSQPKQ	1.35	AHT	-0.4	-1.56	0.73	6	2042.81	KKPLKKKPTP
VPGPGGPAGGGPGGARPLNVALV	1.02	AHT	0.09	0.28	-0.28	1	1967.61	VPGPGGPAGG
PKPPLPGIRVVDNSPPPAL	1.57	AHT	-0.09	-0.29	0.03	1	1964.61	PKPPLPGIRV
ASSPAPPEGPSHPREP	1.31	AHT	-0.25	-1.47	0.53	-0.5	1612.92	ASSPAPPEGP
HQQTHSGEKPYVCGE	1.92	AHT	-0.27	-1.52	0.23	0	1700.04	HQQTHSGEKP
PGTPGVPGKDGQAGHPGQPG	1.33	AHT	-0.11	-1.16	0.17	0.5	1811.25	PGTPGVPGKD
PRALGPSVSSYNSF	1.07	AHT	-0.11	-0.25	-0.3	1	1481.81	PRALGPSVSS
PGSLALTPAAPGAGLLGPSHSYSSSPLS	1.31	AHT	0.06	0.21	-0.43	0.5	2593.29	PGSLALTPAA
GEPGTVKIISLPGSPGPPGSA	1.15	AHT	0.03	-0.08	-0.04	0	1918.49	GEPGTVKIIS
SQKRGISSEEEEGEVDSEVE	1.47	AHT	-0.38	-1.55	1.33	-6	2223.53	SQKRGISSEE
GPDDSIPSGKQSQETAGQDS	0.98	AHT	-0.29	-1.52	0.7	-3	2004.29	GPDDSIPSGK
KLPHANVPSAGGSASPGLPP	1.13	AHT	-0.02	-0.25	-0.15	1.5	1854.38	KLPHANVPSA
SSPNVSPTSVSPPTPP	1.42	AHT	-0.1	-0.63	-0.13	0	1550.89	SSPNVSPTSV
GPPGLPGLPGPPGARGPRGPPGP	1.27	AHT	-0.07	-0.82	0.08	2	2055.71	GPPGLPGLPG
TAVAPSGRGEPGPPSE	1.08	AHT	-0.15	-0.85	0.42	-1	1508.82	TAVAPSGRGE
LSTVTTSSSGTNPSSSASSTAM	1.21	AHT	-0.09	-0.12	-0.21	0	2061.45	LSTVTTSSSG
VVSAVSASLPQSSSPASPEPR	1.08	AHT	-0.11	-0.08	0.02	0	2053.53	VVSAVSASLP
GEIPTCSHWPSPSIPWE	1.88	AHT	-0.03	-0.61	-0.32	-1.5	1923.37	GEIPTCSHWP
SPSPQFSIVPGKSPSSP	1.24	AHT	-0.1	-0.54	-0.05	1	1699.12	SPSPQFSIVP
PWWSIPQAGSGPGTS	1.15	AHT	0.02	-0.54	-0.56	0	1527.87	PWWSIPQAGS
EPEGSGASLASTGTP	1.21	AHT	-0.07	-0.52	0.22	-2	1360.6	EPEGSGASLA
LHTNESHVTLSLH	0.91	AHT	-0.09	-0.31	-0.42	0.5	1487.84	LHTNESHVTL
SLGSRTSRSTSVSS	0.96	AHT	-0.32	-0.6	0.29	2	1411.67	SLGSRTSRST
LPSVAGLFTQSSGSP	1.32	AHT	0.05	0.33	-0.47	0	1447.82	LPSVAGLFTQ
QPGPVESSLLPIASDLEPFPG	1.68	AHT	0.01	-0.02	-0.08	-3	2150.72	QPGPVESSLL
SHVPPSPPVPPGPVPPP	1.11	AHT	0.01	-0.51	-0.26	0.5	1655.16	SHVPPSPPVP
VHSQTNGAQPPALGSVPSGAPV	1	AHT	-0.01	-0.12	-0.33	0.5	2071.6	VHSQTNGAQP
QGIDGEPGVPGQPGAP	1.39	AHT	-0.04	-0.74	0.16	-2	1475.82	QGIDGEPGVP
PETPSCKQPEPPVRDSS	1.86	AHT	-0.37	-1.58	0.78	-1	1854.24	PETPSCKQPE
LPPTAALPPRVSM	0.92	AHT	-0.01	0.38	-0.35	1	1349.83	LPPTAALPPR
SQKPSHLGQGTTV	1.32	AHT	-0.19	-0.88	-0.05	1.5	1339.67	SQKPSHLGQG
AVPTSLPQGLSLPSFP	2.09	AHT	0.08	0.43	-0.57	0	1611.1	AVPTSLPQGL
KPGRTGKPGPPGPPGDP	1.18	AHT	-0.27	-1.75	0.68	2	1612.06	KPGRTGKPGP
PSRASSPALEAPIQSEM	0.91	AHT	-0.16	-0.44	0.24	-1	1771.2	PSRASSPALE
TLPPYQLPDSTYPT	2.09	AHT	-0.1	-0.81	-0.42	-1	1592.96	TLPPYQLPDS
PAPMLGSAETPPPVPAPGSPVS	1.46	AHT	0.04	-0.03	-0.19	-1	2056.66	PAPMLGSAET
TIWGISSTPAPPDSVFSS	0.9	AHT	0.04	0.16	-0.43	-1	1849.27	TIWGISSTPA
EGSSAQAPASKKPKEEL	1.04	AHT	-0.31	-1.32	0.93	0	1757.16	EGSSAQAPAS
QRPSPESSPAPERL	1.72	AHT	-0.41	-1.62	0.77	0	1550.87	QRPSPESSPA
PYHGMHGGGPGGPGGG	0.98	AHT	0.04	-0.89	-0.29	1	1391.74	PYHGMHGGGP
PQERPPPYLAAPG	1.72	AHT	-0.17	-1.06	0.08	0	1392.75	PQERPPPYLA
LQPQGPNSIPTPTA	1.6	AHT	-0.09	-0.67	-0.29	0	1420.79	LQPQGPNSIP
QGDYTPMEDSEETSQSLQID	1.74	AHT	-0.28	-1.42	0.57	-6	2273.61	QGDYTPMEDS
LLPEEPEEGTSQDPSPD	2.02	AHT	-0.26	-1.53	0.87	-6	1840.12	LLPEEPEEGT
NHGSPRPLELAPLVKPS	1.48	AHT	-0.16	-0.56	0.11	1.5	1812.35	NHGSPRPLEL
GPPKDESTGSETYL	1.81	AHT	-0.23	-1.35	0.55	-2	1480.74	GPPKDESTGS
VYLSHTLGAASPFMRPTVPPPQ	1.5	AHT	-0.02	0.02	-0.51	1.5	2367.08	VYLSHTLGAA
PVPQSQSISLVQQSEFSLE	1.22	AHT	-0.1	-0.26	-0.14	-2	2103.6	PVPQSQSISL
PPAPSPGLPQPAFPPGQTAP	1.45	AHT	-0.01	-0.58	-0.28	0	1924.46	PPAPSPGLPQ
METESQETGSKGQ	1.64	AHT	-0.36	-1.79	0.84	-2	1411.65	METESQETGS
LVGGPSALTSPAGQLLP	0.93	AHT	0.12	0.66	-0.55	0	1578.1	LVGGPSALTS
PPGSTSPEDCVCKEGYQASG	1.69	AHT	-0.18	-0.86	0.32	-2	2012.42	PPGSTSPEDC
EQDTPDAPPRPTSYY	1.28	AHT	-0.34	-1.86	0.44	-2	1737	EQDTPDAPPR
SSSSSTSHLASPPSLG	1.04	AHT	-0.08	-0.28	-0.16	0.5	1501.78	SSSSSTSHLA
TDEDVPLHSPGSEGS	1.25	AHT	-0.19	-1.09	0.58	-3.5	1526.74	TDEDVPLHSP
LNEGKEGPPLSNTTFPHIL	0.98	AHT	-0.08	-0.54	-0.07	-0.5	2064.62	LNEGKEGPPL
SESQTSSPSSYGLPT	2.17	AHT	-0.18	-0.95	0.01	-1	1527.76	SESQTSSPSS
PAAPVPPLSSPYIEYTPASPA	1.82	AHT	0.04	-0.03	-0.39	-1	2125.68	PAAPVPPLSS
LRKQLPPPPPPIP	1.2	AHT	-0.17	-0.85	0.06	2	1449.99	LRKQLPPPPP
CELLPPAGPSPAAPLVP	1.51	AHT	0.1	0.54	-0.36	-1	1629.18	CELLPPAGPS
SPFPDGETWIGETHR	1.14	AHT	-0.19	-1.2	0.22	-1.5	1729.05	SPFPDGETWI
KPQQSPAPPASAPAP	1.28	AHT	-0.16	-0.99	0.13	1	1443.81	KPQQSPAPPA
ASQGSSMPHTEPPKA	1.22	AHT	-0.2	-1.13	0.26	0.5	1524.87	ASQGSSMPHT
AEEVPVPGTPSASQGN	1.19	AHT	-0.1	-0.62	0.16	-2	1539.84	AEEVPVPGTP
QGSPPSSPAAVDGQELQG	1.03	AHT	-0.13	-0.79	0.18	-2	1725.06	QGSPPSSPAA
LCPPGDKEPEDCKVPPRPFE	1.49	AHT	-0.29	-1.2	0.81	-2	2253.84	LCPPGDKEPE
QQQPSPSASTAQTTQL	1.37	AHT	-0.24	-1.11	-0.13	0	1673	QQQPSPSAST
ARPPPWAPPCCPSSAKCSRE	1.02	AHT	-0.26	-0.82	0.25	2	2140.72	ARPPPWAPPC
VAPTGIPAAPGPVNPPPP	1.38	AHT	0.08	0.03	-0.36	0	1649.17	VAPTGIPAAP
LVRNSLAAPPLNLPS	1.39	AHT	-0.04	0.34	-0.38	1	1562.06	LVRNSLAAPP
LPPPAPPGFSGPVSSPQINST	1.83	AHT	0	-0.28	-0.33	0	2047.59	LPPPAPPGFS
TCPSTSTPPAGSG	1.7	AHT	-0.07	-0.45	-0.14	0	1162.4	TCPSTSTPPA
ETSYAELAAQISYSE	0.91	AHT	-0.1	-0.4	0	-3	1661.94	ETSYAELAAQ
QGPSPGDSSPPKP	1.29	AHT	-0.26	-1.7	0.55	0	1250.5	QGPSPGDSSP
ELIRTKSSPSSDEEE	1.81	AHT	-0.41	-1.54	1.21	-3	1706.98	ELIRTKSSPS
PISAEGSTAPLEKE	1.3	AHT	-0.13	-0.6	0.54	-2	1428.75	PISAEGSTAP
RVKPPSGLQGPPQA	1.78	AHT	-0.22	-0.97	0.21	2	1431.86	RVKPPSGLQG
TPSWPPTEPPSTVTG	1.68	AHT	-0.08	-0.87	-0.19	-1	1553.89	TPSWPPTEPP
AGVVPQPSPQTSERPTILSPL	1.85	AHT	-0.09	-0.23	-0.11	0	2174.79	AGVVPQPSPQ
RFGQESKTSPLTCL	1	AHT	-0.23	-0.54	0.14	1	1566.99	RFGQESKTSP
EDPDAALTGVVETTIEPSPYPHPQFP	1.31	AHT	-0.08	-0.59	0.05	-4.5	2808.42	EDPDAALTGV
QCPIPSTDEFATLCGSQ	1.2	AHT	-0.08	-0.16	-0.14	-2	1797.22	QCPIPSTDEF
EGTAPSPGRISPPT	0.95	AHT	-0.16	-0.85	0.25	0	1366.68	EGTAPSPGRI
VTHPSGSTSTPASRS	1.72	AHT	-0.21	-0.76	0.05	1.5	1471.74	VTHPSGSTST
PVTPGRDRPPKQP	1.39	AHT	-0.45	-1.91	0.79	2	1444.83	PVTPGRDRPP
LQAESPPVDPDSQAETEHETPE	1.63	AHT	-0.27	-1.48	0.75	-6.5	2406.76	LQAESPPVDP
LPGFPGSPVSPLGPGIPT	1.7	AHT	0.14	0.31	-0.51	0	1690.24	LPGFPGSPVS
SLEQGRSPESQMAEH	1.34	AHT	-0.34	-1.47	0.61	-1.5	1686	SLEQGRSPES
PNSPETLAPSSPDIPA	1.18	AHT	-0.1	-0.61	0.13	-2	1592.93	PNSPETLAPS
WEKEGSPSKPPALE	2.1	AHT	-0.25	-1.46	0.71	-1	1554.91	WEKEGSPSKP
GPGPSPGAMLGPSPGP	1.01	AHT	0.06	-0.36	-0.19	0	1375.79	GPGPSPGAML
PPAPPPPPPEVIAEP	0.99	AHT	-0.01	-0.61	0.11	-2	1504.94	PPAPPPPPPE
KGEQGITGPSGPIGPP	1.31	AHT	-0.05	-0.74	0.16	0	1491.91	KGEQGITGPS
GGPMPGPHGGPGGPGGPV	1.23	AHT	0.08	-0.57	-0.18	0.5	1481.93	GGPMPGPHGG
QATTPSSPAPVTEPVALP	1.55	AHT	-0.02	-0.06	-0.21	-1	1763.22	QATTPSSPAP
PGPVGEPGLLGPPGLLGP	1.65	AHT	0.14	0.22	-0.32	-1	1624.2	PGPVGEPGLL
GSLGGPPGFGSGPPGLGNAPGHLSGPPAF	0.96	AHT	0.09	-0.13	-0.37	0.5	2557.26	GSLGGPPGFG
PGTRGSSSPSSQPPGPHPH	1.47	AHT	-0.25	-1.57	0.17	2	1867.23	PGTRGSSSPS
SASYNSPIGLYSTSNL	1.01	AHT	-0.04	-0.15	-0.56	0	1674.02	SASYNSPIGL
VLSQPPSVASFLGAT	0.94	AHT	0.11	0.81	-0.63	0	1473.9	VLSQPPSVAS
QGLPGTSGPPGENGKP	1.4	AHT	-0.15	-1.28	0.28	0	1492.85	QGLPGTSGPP
EELPNEEEELSPPLMEYNINVKSIPEIQ	1.11	AHT	-0.17	-0.86	0.45	-7	3285.07	EELPNEEEEL
APPGPERSPASPAVCEAPSP	1.15	AHT	-0.13	-0.58	0.27	-1	1917.37	APPGPERSPA
GPGALPPYAPKLSSST	1.74	AHT	-0.03	-0.27	-0.21	1	1542.97	GPGALPPYAP
PPGQNGIPGFPGLIGTPGLK	1	AHT	0.06	-0.13	-0.34	1	1917.56	PPGQNGIPGF
EEEEEGSSKYDILASE	1.57	AHT	-0.29	-1.4	1.16	-6	1815.05	EEEEEGSSKY
EPLQGEPMQINHEQSDKE	1.36	AHT	-0.34	-1.82	0.76	-3.5	2109.53	EPLQGEPMQI
YKLLSQSGPVHAP	1.36	AHT	-0.06	-0.27	-0.35	1.5	1396.8	YKLLSQSGPV
DSYGRPLYSSQPHE	1.76	AHT	-0.31	-1.64	0.23	-0.5	1635.9	DSYGRPLYSS
KLPKKKNKHIPRPPQPG	1.41	AHT	-0.47	-2.02	0.84	6.5	1963.66	KLPKKKNKHI
TEKVDDSFCSSHPKPS	0.97	AHT	-0.3	-1.19	0.64	-0.5	1764.1	TEKVDDSFCS
NYSSGSPPFPKGLA	1.21	AHT	-0.07	-0.59	-0.21	1	1421.76	NYSSGSPPFP
EKPVVIGPLKIPTS	1.02	AHT	-0.02	0.23	0.04	1	1478.02	EKPVVIGPLK
QSSPGPSTAYHTSSQ	2.19	AHT	-0.21	-1.25	-0.15	0.5	1534.76	QSSPGPSTAY
RCPPSTSTGYWGVAPET	1.55	AHT	-0.12	-0.65	-0.19	0	1809.21	RCPPSTSTGY
TPASTISSSTLSVGSFSEH	1.55	AHT	-0.03	0.04	-0.25	-0.5	1895.27	TPASTISSST
TSASIAYDLPSSSGSPPAYP	1.41	AHT	-0.03	-0.24	-0.27	-1	1968.36	TSASIAYDLP
PQPTHEPEPLSMTF	1.76	AHT	-0.13	-0.99	-0.03	-1.5	1611	PQPTHEPEPL
VNKEAWSSPPVAVPVPPPED	1.09	AHT	-0.08	-0.48	0.12	-2	2115.64	VNKEAWSSPP
SGVTQPGGAPVARVPPVHRP	1.31	AHT	-0.11	-0.3	-0.07	2.5	1979.56	SGVTQPGGAP
PPVPQEMPTSMEFQEV	1.63	AHT	-0.11	-0.65	0.07	-3	1846.33	PPVPQEMPTS
DPDPGPQPEELGPRA	1.08	AHT	-0.29	-1.68	0.86	-3	1574.87	DPDPGPQPEE
PVSSPQSSPWGQQETL	2.19	AHT	-0.16	-1	-0.14	-1	1728.08	PVSSPQSSPW
LIPKGSIAQPTGAAQPPSNCPP	1.11	AHT	-0.05	-0.29	-0.19	1	2144.79	LIPKGSIAQP
PSPFGKEPLPPSSPLQKG	1.96	AHT	-0.15	-0.96	0.22	1	1863.4	PSPFGKEPLP
SDSDSDSSTEFEEGVAQAEEPEAVVLEE	1.1	AHT	-0.2	-0.86	0.86	-11	2986.35	SDSDSDSSTE
VTSAPGTSEPTGSFP	1.85	AHT	-0.03	-0.32	-0.12	-1	1434.72	VTSAPGTSEP
HGWQHASGTPLSPH	1.44	AHT	-0.09	-1.05	-0.49	1.5	1511.83	HGWQHASGTP
FSPSLATAASLLEVNP	0.92	AHT	0.07	0.66	-0.45	-1	1617.05	FSPSLATAAS
CCECSASLSHQYY	1.21	AHT	-0.12	-0.16	-0.48	-0.5	1493.81	CCECSASLSH
YVPPYGYSDQSYHTHLLS	1.88	AHT	-0.08	-0.75	-0.64	0	2127.56	YVPPYGYSDQ
GALKVEPPRNQDPAHPDKPK	0.95	AHT	-0.37	-1.69	0.83	1.5	2194.76	GALKVEPPRN
GPPGPSGPTGEKGEPGPRGLVGPP	1.6	AHT	-0.11	-1.04	0.36	0	2194.79	GPPGPSGPTG
SRPLATGPSSQSHQQ	1.64	AHT	-0.31	-1.34	0.11	1.5	1580.89	SRPLATGPSS
GLGPPSKHSAPDPPKA	1.15	AHT	-0.18	-1.09	0.39	1.5	1555.97	GLGPPSKHSA
FLEQGDSTSWPSPAMTTSAEISLG	1.02	AHT	-0.03	-0.19	-0.17	-3	2513.07	FLEQGDSTSW
EIPAGPGREPVQTLYSQSP	1.9	AHT	-0.16	-0.79	0.09	-1	2026.51	EIPAGPGREP
SRFRSSTSGSWAPECR	1.15	AHT	-0.38	-1.09	0.36	2	1814.16	SRFRSSTSGS
YSNLTSSSLTQSSCAVTQQ	1.57	AHT	-0.15	-0.32	-0.39	0	2005.41	YSNLTSSSLT
QESNVTIGPSGPQ	1.5	AHT	-0.15	-0.89	0.04	-1	1313.58	QESNVTIGPS
PPVPGKPRQVLPPGASHFTPPQT	2.31	AHT	-0.13	-0.77	-0.1	2.5	2406.12	PPVPGKPRQV
PSPMPVSKECFETLR	1.19	AHT	-0.2	-0.49	0.27	0	1721.22	PSPMPVSKEC
PRPAEKAEPPPSGTPVPDA	1.09	AHT	-0.23	-1.18	0.63	-1	1913.36	PRPAEKAEPP
SQSFNTDTTTSGISSMSSSPSRETV	1.33	AHT	-0.22	-0.71	0.12	-1	2595.04	SQSFNTDTTT
QNSSAGQEVSGPPCTKA	0.96	AHT	-0.2	-0.86	0.21	0	1661.01	QNSSAGQEVS
PQPLTGTVKTSPESLSKLDAPPS	1.95	AHT	-0.16	-0.63	0.21	0	2350.98	PQPLTGTVKT
KPASPTSSRKTSPGPG	1.35	AHT	-0.32	-1.39	0.56	3	1554.93	KPASPTSSRK
LRAQGTGTVSSTSSS	1.27	AHT	-0.18	-0.34	-0.02	1	1438.72	LRAQGTGTVS
PPRPSRSLCPAVAF	1.09	AHT	-0.15	-0.01	-0.09	2	1497.95	PPRPSRSLCP
GGEGLADDDEDEEIDL	1.06	AHT	-0.22	-1.18	1.32	-9	1691.86	GGEGLADDDE
AGSPPVVETTNGRPP	1.21	AHT	-0.15	-0.71	0.15	0	1478.83	AGSPPVVETT
PGGVGFPGSRGDIGPPGPPG	1.26	AHT	0	-0.51	0.02	0	1775.25	PGGVGFPGSR
LVSLPQAPLPSAPPSFLP	1.94	AHT	0.1	0.57	-0.62	0	1831.44	LVSLPQAPLP
YPGSSHTSDIYGGANPVNLYSTSSQ	1.03	AHT	-0.1	-0.7	-0.34	-0.5	2603.07	YPGSSHTSDI
PGTPSQNTQCQPCPPGTFSAS	2.1	AHT	-0.15	-0.84	-0.21	0	2105.57	PGTPSQNTQC
LVRLSESSPQDCSLS	0.92	AHT	-0.2	-0.17	0.19	-1	1621	LVRLSESSPQ
YCTHHSPCKNGATCSNSGQ	1.12	AHT	-0.23	-1	-0.16	2	1995.41	YCTHHSPCKN
SPTRPNFHQNCRLYP	1.13	AHT	-0.36	-1.41	-0.11	2.5	1830.26	SPTRPNFHQN
SPRSLPPSSPIRPMARSSTA	0.92	AHT	-0.27	-0.66	0.22	3	2095.66	SPRSLPPSSP
VLRAQSRAPTQLPPLLP	1.18	AHT	-0.14	-0.05	-0.2	2	1857.48	VLRAQSRAPT
SPFLSLSSLLRPQSEPQ	1.69	AHT	-0.15	-0.34	-0.11	0	1886.38	SPFLSLSSLL
TPSAPPYGAAFPPFPEGHPAVLPG	1.51	AHT	0.07	-0.11	-0.43	-0.5	2375.01	TPSAPPYGAA
LYSPVTPVTPGTPGNT	1.95	AHT	0	-0.21	-0.51	0	1601.02	LYSPVTPVTP
PASPPLSSTSPTTTAAT	1.49	AHT	-0.06	-0.23	-0.24	0	1586.93	PASPPLSSTS
SDEDGSSDESEEGK	1.28	AHT	-0.46	-2.31	1.8	-6	1470.51	SDEDGSSDES
LPPRSTLQHPDYL	1.5	AHT	-0.2	-0.84	-0.16	0.5	1536.94	LPPRSTLQHP
SRPTELSLEELSISARPPGPP	1.66	AHT	-0.2	-0.67	0.39	-1	2233.8	SRPTELSLEE
PALHLPELEREEEKE	0.99	AHT	-0.35	-1.51	1.17	-3.5	1819.22	PALHLPELER
QGHSARSKRSAYPSTSRGL	0.99	AHT	-0.4	-1.32	0.41	4.5	2046.49	QGHSARSKRS
LVFSSSATVYGNPQYL	0.97	AHT	0.05	0.37	-0.83	0	1746.18	LVFSSSATVY
KQPPPQPALPYNHIYQ	2.27	AHT	-0.19	-1.35	-0.34	1.5	1891.4	KQPPPQPALP
HGFAPYFYTPAPPGFGPEH	1.25	AHT	0.05	-0.55	-0.61	0	2089.56	HGFAPYFYTP
PPQDSPYGRYRSPDPLLSIFVTQ	1.41	AHT	-0.2	-0.78	-0.05	0	2634.27	PPQDSPYGRY
EEQPTQEGLDENAQASQSPSGSGVGG	1.05	AHT	-0.21	-1.25	0.48	-5	2559.94	EEQPTQEGLD
PVVPAPSKPGSEEWV	1.66	AHT	-0.05	-0.39	0.08	-1	1578.99	PVVPAPSKPG
RNVQRPLLQAPFLPPKPPPPLIVV	1.8	AHT	-0.08	0.03	-0.29	3	2687.68	RNVQRPLLQA
PLADGSSNPSLHETL	1.13	AHT	-0.1	-0.48	0.02	-1.5	1537.86	PLADGSSNPS
QLHPSSSASFTQASNVSNYSGQTLQP	1.43	AHT	-0.15	-0.69	-0.34	0.5	2737.27	QLHPSSSASF
AASPGPPEPEGSWLPAVGSSHL	1.51	AHT	0.01	-0.29	-0.15	-1.5	2143.65	AASPGPPEPE
GGSRGSSEEGPPGLPG	1.16	AHT	-0.16	-1.08	0.51	-1	1440.72	GGSRGSSEEG
NPSCKAVLHGPFNPY	1.37	AHT	-0.07	-0.42	-0.43	1.5	1644.09	NPSCKAVLHG
GSSAPGQQTDVPPALPEKK	1.44	AHT	-0.21	-1.04	0.44	0	1907.38	GSSAPGQQTD
GYLSDVASPPLLPSPFQP	2.1	AHT	0.04	0.06	-0.45	-1	1885.4	GYLSDVASPP
VQSYGPPQGSSFGNQYGSEG	1.01	AHT	-0.13	-1.07	-0.18	-1	2046.39	VQSYGPPQGS
SHPDCPPGPGAIPTRAPQAFTVPS	0.96	AHT	-0.08	-0.43	-0.12	0.5	2401.02	SHPDCPPGPG
ELPHADGSSGPPGPPGPIGIPGAPGVPG	1.32	AHT	0.05	-0.31	-0.06	-1.5	2485.17	ELPHADGSSG
PSPKSLPSYLNGVMPPTQSFA	1.71	AHT	-0.05	-0.3	-0.36	1	2218.85	PSPKSLPSYL
EETTSSSPPDSESAPSSLSAAGTP	1.87	AHT	-0.17	-0.84	0.41	-4	2292.61	EETTSSSPPD
PPSAASDEPLPEPLET	1.59	AHT	-0.13	-0.82	0.47	-4	1649.98	PPSAASDEPL
HMPPQIEAPRVMMTPPPVTPQ	1.04	AHT	-0.1	-0.5	-0.2	0.5	2355.14	HMPPQIEAPR
GTPGEEEPSQPSATPHSGT	2.12	AHT	-0.2	-1.45	0.42	-2.5	1866.15	GTPGEEEPSQ
SNQNLEDLIPPRPP	0.98	AHT	-0.27	-1.22	0.32	-1	1589.97	SNQNLEDLIP
RLSPPGGSGSGVPGGGPLLPAAGRE	0.92	AHT	-0.05	-0.28	0.08	1	2243.88	RLSPPGGSGS
TEHVSQTEVPVHLMWQTPG	1.06	AHT	-0.07	-0.5	-0.34	-1	2176.73	TEHVSQTEVP
ASSPVQVPGPAPASTETRLQEAQC	1.06	AHT	-0.15	-0.45	0.08	-1	2425	ASSPVQVPGP
NGTPKGPKTPTMSSCSSS	1.28	AHT	-0.24	-1.03	0.23	2	1767.2	NGTPKGPKTP
GWTPGEDSYREWIQ	0.94	AHT	-0.22	-1.5	0.09	-2	1724.02	GWTPGEDSYR
PPSQNSSVGPGRGSEGDCSPE	1.22	AHT	-0.26	-1.3	0.54	-2	2044.38	PPSQNSSVGP
RGLPGPTGAVGLPGPPGPSGLVGPQ	1.6	AHT	0.03	-0.09	-0.23	1	2235.96	RGLPGPTGAV
QILLDWASQSNSQYPDPSTQPTV	1.25	AHT	-0.15	-0.78	-0.25	-2	2576.11	QILLDWASQS
KFQSEEQQQTEDELQDKL	1.08	AHT	-0.46	-2.08	1.04	-4	2223.61	KFQSEEQQQT
PPVAMLQIPVAPAVPAVNLVPPTFPVSMP	1.1	AHT	0.16	0.97	-0.73	0	2951.06	PPVAMLQIPV
HSVKRASVPPVPGKPRQVLPPGASHF	1.39	AHT	-0.17	-0.48	0.03	5	2746.59	HSVKRASVPP
NKTPPTAALSAPPPLIST	1.11	AHT	-0.03	-0.09	-0.24	1	1776.31	NKTPPTAALS
ESAPSQTDSDVPPETEECPSITAD	1.39	AHT	-0.22	-1.04	0.66	-7	2505.87	ESAPSQTDSD
RTPPQQKSPTVARRLSITSLTGKT	1.04	AHT	-0.33	-0.89	0.29	5	2624.39	RTPPQQKSPT
PPAKGPISKPELVG	1.69	AHT	-0.07	-0.36	0.26	1	1389.86	PPAKGPISKP
ARELEELNVPGEIVESLSSSEESL	1.09	AHT	-0.16	-0.36	0.55	-6	2617.17	ARELEELNVP
PGSPGPKGSPGFPGIPGPPGQPGPRGSMG	1.11	AHT	-0.06	-0.87	0.05	2	2625.39	PGSPGPKGSP
RGSDGSSGPPGPPGSIGPKGPE	0.99	AHT	-0.17	-1.2	0.52	0	1990.43	RGSDGSSGPP
PGPGLGPNPRSSGLGPGL	1.31	AHT	-0.04	-0.48	-0.09	1	1630.11	PGPGLGPNPR
QPGGVPGAVPGGVPGGVF	1.31	AHT	0.18	0.48	-0.49	0	1549.04	QPGGVPGAVP
GRPGPGPSQSPGAQGPS	1.12	AHT	-0.19	-1.3	0.22	1	1533.86	GRPGPGPSQS
YISYLVAPGSTSGPSRLN	1.06	AHT	-0.05	-0.02	-0.44	1	1882.36	YISYLVAPGS
ATPPGWQATSPGWQAPPQG	1.2	AHT	-0.06	-0.96	-0.43	0	1934.37	ATPPGWQATS
PMQPPRPPAPAPVPAARPPPPAP	0.94	AHT	-0.13	-0.79	0.04	2	2307.05	PMQPPRPPAP
CSLKIQSTEPQDSA	1.19	AHT	-0.24	-0.71	0.34	-1	1506.84	CSLKIQSTEP
PSVRESADLGEFSPSAAVSTLFQP	0.98	AHT	-0.08	-0.06	0.01	-2	2493.05	PSVRESADLG
SSGGPVLSLAPLSTT	1.46	AHT	0.08	0.59	-0.47	0	1386.78	SSGGPVLSLA
RTASEPSAQLSYASSGR	1.32	AHT	-0.29	-0.87	0.28	1	1768.09	RTASEPSAQL
PRPSTSQGCSRDAS	1.02	AHT	-0.42	-1.37	0.61	1	1448.7	PRPSTSQGCS
EAGESPPPAPGTPKA	1.08	AHT	-0.14	-1.05	0.49	-1	1405.72	EAGESPPPAP
PQYSIPSSYHKLRA	1.59	AHT	-0.24	-0.94	-0.15	2.5	1647.06	PQYSIPSSYH
LSSPEGGLFQRHHP	1.3	AHT	-0.18	-0.94	-0.02	1	1561.93	LSSPEGGLFQ
EEVDEDGSGTIDFEE	1.62	AHT	-0.23	-1.25	1.21	-8	1670.82	EEVDEDGSGT
YHHHQPVPGYLDMPVVPGLGGPGES	1.5	AHT	0	-0.46	-0.36	-0.5	2641.35	YHHHQPVPGY
LSAGLPPLKASHSAHSTHSAHSTHSTH	0.99	AHT	-0.12	-0.59	-0.24	4	2757.37	LSAGLPPLKA
AKPSPFEGKTSTEP	2.1	AHT	-0.25	-1.31	0.63	0	1475.8	AKPSPFEGKT
DIKPGTPPISGRSTTPTSSP	1.23	AHT	-0.2	-0.89	0.25	1	1996.48	DIKPGTPPIS
SQIIGETSSASTGYFS	1.14	AHT	-0.02	-0.06	-0.31	-1	1634.94	SQIIGETSSA
RGEAAGSGKPVAVKEPQELPPKAPV	1.01	AHT	-0.18	-0.66	0.53	1	2513.25	RGEAAGSGKP
AQQPREIIMESSSTP	1.05	AHT	-0.23	-0.81	0.3	-1	1674.07	AQQPREIIME
PSQPGQASSNASTPLPALPLYPDPVRL	1.91	AHT	-0.1	-0.39	-0.19	0	2774.51	PSQPGQASSN
LPGMTPQTPVVTPKQ	1.62	AHT	-0.08	-0.38	-0.26	1	1594.13	LPGMTPQTPV
LAAIALESSENSRSTPEEGEE	1.07	AHT	-0.22	-0.83	0.72	-5	2219.59	LAAIALESSE
PGKPEHLLEGSTWQ	1.61	AHT	-0.16	-1.17	0.11	-0.5	1578.96	PGKPEHLLEG
QLSTHSEDAEEFDFGDT	1.39	AHT	-0.23	-1.17	0.6	-5.5	1928.14	QLSTHSEDAE
LAGLGPGEDAESDEDSQPEDPGTPSSP	1.23	AHT	-0.2	-1.25	0.76	-8	2655.02	LAGLGPGEDA
PYAPPEWSQGDSGMTPVPNTPRLSPEQH	1.74	AHT	-0.2	-1.25	0.05	-1.5	3076.75	PYAPPEWSQG
SDGQPGPPGPPGTAGFP	1.17	AHT	-0.04	-0.91	0.01	-1	1535.87	SDGQPGPPGP
AVLPGKQVSPLPAQEGQ	0.94	AHT	-0.08	-0.28	-0.04	0	1719.23	AVLPGKQVSP
QMQGNPTMVPLPPGVQPPL	1.4	AHT	-0.02	-0.28	-0.46	0	2001.69	QMQGNPTMVP
LQPPSTTPCPTVMRAEVPNQT	1.2	AHT	-0.17	-0.56	-0.11	0	2267.9	LQPPSTTPCP
APPPAAAVPGPSVPQP	1.33	AHT	0.05	-0.02	-0.28	0	1452.88	APPPAAAVPG
YPALPNHGGPSTMVPA	1.06	AHT	0.03	-0.2	-0.52	0.5	1609.06	YPALPNHGGP
GPSPASPALPEGPRPSRP	1.2	AHT	-0.23	-1.08	0.39	1	1770.21	GPSPASPALP
HLGPPPDDLPSYSANYS	1.38	AHT	-0.12	-0.95	-0.12	-1.5	1830.17	HLGPPPDDLP
LRSAPSLQSRRSSFS	1.15	AHT	-0.38	-0.75	0.29	3	1679.06	LRSAPSLQSR
YTEEPAQTSCIEE	1.33	AHT	-0.22	-1.06	0.47	-4	1499.74	YTEEPAQTSC
FIPKPKPVNSMPTF	1.25	AHT	-0.06	-0.21	-0.25	2	1603.15	FIPKPKPVNS
YSFRNLPSSASPPQPSP	1.76	AHT	-0.2	-0.96	-0.13	1	1832.22	YSFRNLPSSA
TNTQDPFLMFERPSKQVYQSES	0.92	AHT	-0.28	-1.17	0.18	-1	2633.2	TNTQDPFLMF
PRPSQSSLHNRGTPLVLGAPRQSSP	1.58	AHT	-0.27	-0.93	0.11	3.5	2640.32	PRPSQSSLHN
LLGALPLPLLLLLPLLLLPPS	1.11	AHT	0.32	2	-1.12	0	2190.24	LLGALPLPLL
FPPSAHQQPPHYTTSALQQ	2.03	AHT	-0.16	-1.1	-0.42	1	2135.6	FPPSAHQQPP
CFSPSGHILASCST	0.91	AHT	0.05	0.63	-0.59	0.5	1409.78	CFSPSGHILA
PVSPEKDATFPTPVALCIPHSP	1.37	AHT	-0.03	-0.05	-0.13	-0.5	2303.96	PVSPEKDATF
DVFLPCEDPPPTPQ	1.54	AHT	-0.11	-0.67	0.14	-3	1554.92	DVFLPCEDPP
ETPKSCTKSSKNS	1.13	AHT	-0.46	-1.72	0.89	2	1396.7	ETPKSCTKSS
GPPGLDGFHGLPGPPGDGIKGPR	1.03	AHT	-0.06	-0.72	0.16	0.5	2195.82	GPPGLDGFHG
PPELEPGLFDPQPAMVGSLLYPEPW	1.81	AHT	0.02	-0.26	-0.25	-4	2780.56	PPELEPGLFD
TSDSGKLNQKPPSSEELEGENPGKEF	1.61	AHT	-0.32	-1.64	0.86	-3	2805.34	TSDSGKLNQK
SSPAPAPKKESSPKSHESVSS	1.16	AHT	-0.3	-1.28	0.69	1.5	2124.56	SSPAPAPKKE
VTVLPVPAPGPVQGQNYSVW	1.32	AHT	0.07	0.26	-0.75	0	2108.73	VTVLPVPAPG
EDVPALPPPCEEPPGTLLQRKGWPARQR	1	AHT	-0.27	-1.08	0.42	0	3139	EDVPALPPPC
LHPPGSGSQAAAVSVQTTP	1.15	AHT	-0.02	-0.11	-0.33	0.5	1805.25	LHPPGSGSQA
RSGSRLSLCPSAASL	1.04	AHT	-0.17	0.17	0.01	2	1504.92	RSGSRLSLCP
EWGSAEGSSTSWASSPALES	1.36	AHT	-0.08	-0.59	0.03	-3	2026.32	EWGSAEGSST
TIPRPEPPPPVVPVKHRTG	1.65	AHT	-0.21	-0.82	0.23	2.5	2074.73	TIPRPEPPPP
HVLSVTQPLGSSEPALLL	0.99	AHT	0.07	0.68	-0.52	-0.5	1861.45	HVLSVTQPLG
HHYPAPSPESGGGCG	1.33	AHT	-0.08	-0.99	-0.08	0	1452.73	HHYPAPSPES
QTQSLSTPRSALSHPGG	1.7	AHT	-0.2	-0.82	-0.05	1.5	1724.11	QTQSLSTPRS
TPHGVRTQTIHQWPST	1.6	AHT	-0.2	-1.08	-0.35	2	1846.28	TPHGVRTQTI
MEQQPPRPPQPSQPPPPPPMSFRA	1.21	AHT	-0.28	-1.55	0.2	1	2695.44	MEQQPPRPPQ
PERSQGHRPGKGSPVGSSPLQGLENC	1.16	AHT	-0.28	-1.19	0.39	1.5	2675.32	PERSQGHRPG
SADTEFSDESTTAE	1.27	AHT	-0.25	-1.11	0.8	-5	1489.59	SADTEFSDES
VDKETETDTVKKAEMEETESE	1.1	AHT	-0.4	-1.65	1.42	-6	2428.85	VDKETETDTV
FPGTFVGTAEPASPPLSSTSPTTTAATMP	0.95	AHT	0.02	0.02	-0.35	-1	2822.53	FPGTFVGTAE
DGTSEGKGAHHPKPSTSVTMET	0.99	AHT	-0.23	-1.2	0.45	0	2254.73	DGTSEGKGAH
TTGVSTDPEPYKED	1.17	AHT	-0.29	-1.54	0.74	-3	1538.77	TTGVSTDPEP
PPYPAAHDLPQPLLQQPHAQE	1.4	AHT	-0.14	-1.02	-0.16	-1	2347.93	PPYPAAHDLP
PVGGGSAPGPLQPKQPV	1.93	AHT	-0.03	-0.43	-0.09	1	1586.08	PVGGGSAPGP
SPSPSPRAGSPAPGVER	1.14	AHT	-0.25	-0.98	0.45	1	1649.01	SPSPSPRAGS
KRRGRPPAEKLSPNPP	1.07	AHT	-0.53	-1.99	1.01	4	1800.31	KRRGRPPAEK
TPEPGKWESSGYE	2.18	AHT	-0.24	-1.76	0.5	-2	1466.7	TPEPGKWESS
PFVFYPIKPPKSVTLDSAPKP	1.79	AHT	-0.06	-0.2	-0.1	2	2329.07	PFVFYPIKPP
GLLSSPAPRGGQEPQPSGGCPRPHR	1.27	AHT	-0.27	-1.17	0.31	2.5	2539.19	GLLSSPAPRG
KSKQSPISTPTSPGSLRKHKV	0.99	AHT	-0.34	-1.19	0.49	5.5	2263.93	KSKQSPISTP
EEAQCSTNPLSGSTLCVC	1.24	AHT	-0.09	0.07	-0.12	-2	1842.29	EEAQCSTNPL
SSYSYAEDGSGGSPCSLPLCEFSS	1.3	AHT	-0.07	-0.28	-0.07	-3	2430.87	SSYSYAEDGS
TAWTLSTSSVSSQGSL	1.4	AHT	-0.03	0.12	-0.51	0	1611.95	TAWTLSTSSV
SRPLSTQSEPNGSAL	1.71	AHT	-0.24	-0.87	0.21	0	1543.86	SRPLSTQSEP
LPKLVAIPKPTVPPT	1.51	AHT	0.01	0.34	-0.25	2	1571.2	LPKLVAIPKP
LSSSALPSAVTSGLASLSSL	0.95	AHT	0.09	0.97	-0.5	0	1848.36	LSSSALPSAV
PPPTQLSKIKYSGGPQL	1.71	AHT	-0.14	-0.79	-0.06	2	1811.37	PPPTQLSKIK
TSPQNPSSAPGLSLSSRARPQ	1.59	AHT	-0.28	-0.98	0.16	2	2138.61	TSPQNPSSAP
PSAQPEGPDHDPGAV	0.93	AHT	-0.16	-1.16	0.43	-2.5	1473.72	PSAQPEGPDH
APGIPGQPGLPGAPGSPGA	1.01	AHT	0.08	-0.14	-0.24	0	1598.07	APGIPGQPGL
PPARGPPALEGAPPPL	1.12	AHT	-0.05	-0.44	0.06	0	1537.01	PPARGPPALE
QQPPPPSGPQPPQPQPGPLRS	1.33	AHT	-0.27	-1.74	0.13	1	2187.75	QQPPPPSGPQ
KMSKPGSPGPVIPVQPHGKILT	1.06	AHT	-0.07	-0.31	-0.04	3.5	2269.09	KMSKPGSPGP
EPPKANSPEVREVVGPLKGETG	1.27	AHT	-0.22	-0.94	0.65	-1	2290.88	EPPKANSPEV
EPSSSSVFNQNDTWTP	1.62	AHT	-0.21	-1.2	-0.03	-2	1796.05	EPSSSSVFNQ
GQPGPKGDPGVSGIPGAPGLP	1.33	AHT	0	-0.47	0.04	0	1855.4	GQPGPKGDPG
LQPQPHQPLQPQPPVHP	1.15	AHT	-0.18	-1.37	-0.3	1	1938.49	LQPQPHQPLQ
LTVPGPPGPPGAMGPPGPPGA	1.26	AHT	0.09	-0.19	-0.29	0	1821.43	LTVPGPPGPP
GLPGVPGRDGPPGRPGPPGPPGTP	1.32	AHT	-0.12	-1.02	0.22	1	2186.81	GLPGVPGRDG
PHSEAAGGESTAELEP	0.96	AHT	-0.13	-0.89	0.52	-3.5	1581.83	PHSEAAGGES
LAQLSLPSSPSSLNEDSL	1.28	AHT	-0.08	-0.07	-0.07	-2	1858.29	LAQLSLPSSP
LYYRQSSVPDGRSPGAR	0.94	AHT	-0.35	-1.16	0.28	2	1909.32	LYYRQSSVPD
RNVTSPIADFPAPPPYSAVTPP	1.13	AHT	-0.06	-0.27	-0.23	0	2294.88	RNVTSPIADF
PLPAPLYSFPGASCPV	2.05	AHT	0.13	0.59	-0.71	0	1616.12	PLPAPLYSFP
LKQPHPLAPPSQAQFSH	1.48	AHT	-0.15	-0.87	-0.23	2	1883.39	LKQPHPLAPP
PGPPQPPPGLLGQASLL	1.55	AHT	0.05	-0.09	-0.41	0	1639.19	PGPPQPPPGL
PCPAVMSKSESSKSPEEL	1.39	AHT	-0.22	-0.72	0.58	-1	1906.39	PCPAVMSKSE
PPPPPQATEGPQAPAPMAPA	1.01	AHT	-0.06	-0.76	-0.04	-1	1922.45	PPPPPQATEG
PPALPPPAPSPPAWQARA	1.06	AHT	-0.06	-0.54	-0.23	1	1821.34	PPALPPPAPS
APDQSSTIQLHPATSPAVSPTASS	1.32	AHT	-0.09	-0.3	-0.15	-0.5	2350.85	APDQSSTIQL
GVPGLPSTFQYGPAVFPVAPT	1.85	AHT	0.13	0.45	-0.71	0	2102.72	GVPGLPSTFQ
PQPSSGVNGNMQPPGTAGQPPASAL	0.97	AHT	-0.08	-0.66	-0.18	0	2360.95	PQPSSGVNGN
DPEEGQELPVDME	1.43	AHT	-0.25	-1.4	1.05	-6	1487.74	DPEEGQELPV
KVEAPGPLHPAVQLAPQQPLP	1.74	AHT	-0.05	-0.28	-0.18	0.5	2187.89	KVEAPGPLHP
TEETGGSVAFSPGNLST	1.1	AHT	-0.05	-0.31	-0.02	-2	1653.96	TEETGGSVAF
QGRPPQAQPPPGPGPAGVKAGAKPGG	1.26	AHT	-0.15	-1.04	0.23	3	2375.07	QGRPPQAQPP
RILNTSLSDTTSVPTQS	1.25	AHT	-0.19	-0.37	-0.05	0	1820.23	RILNTSLSDT
FSPVVGETLQTLTTSST	1.72	AHT	-0.01	0.23	-0.41	-1	1768.2	FSPVVGETLQ
GCPPESSPPKRLLNLTL	1.4	AHT	-0.16	-0.4	0.07	1	1822.4	GCPPESSPPK
LEYEEQAFQDMSGGDPPGSSTSH	1.24	AHT	-0.19	-1.17	0.32	-4.5	2469.86	LEYEEQAFQD
PRNSSPHLNPLTSASPPL	1.8	AHT	-0.18	-0.74	-0.12	1.5	1885.36	PRNSSPHLNP
EGTNTSGASECESVSD	1.12	AHT	-0.22	-0.9	0.6	-4	1572.74	EGTNTSGASE
PRPVPYFGSTMAYHKGIP	1.11	AHT	-0.07	-0.43	-0.38	2.5	2018.62	PRPVPYFGST
ESTAPSSLVFTPFAS	1.67	AHT	0.04	0.39	-0.39	-1	1540.88	ESTAPSSLVF
REKKESTPSTASLPSYDSVTK	1.27	AHT	-0.36	-1.31	0.72	1	2311.81	REKKESTPST
CPVYPVTTAALSLSGLT	1.04	AHT	0.13	1.02	-0.78	0	1693.23	CPVYPVTTAA
VFTHRPEPSKPPLAPKPAVPQPP	2.09	AHT	-0.17	-0.86	0.14	2.5	2488.25	VFTHRPEPSK
SSSADPKAPPPPPVSSGEPPTLGEN	1.72	AHT	-0.15	-0.98	0.36	-2	2415.93	SSSADPKAPP
ALVSTLEPPYFVTELEPLEASVGDS	0.97	AHT	0.02	0.26	-0.1	-5	2664.32	ALVSTLEPPY
RVVRCPVAAAPTAPTAPPPRGPNPGSQL	0.91	AHT	-0.14	-0.3	-0.03	3	2778.61	RVVRCPVAAA
GPVTTPEHQLLKTPSSSSLSQRV	1.92	AHT	-0.19	-0.59	0.03	1.5	2450.09	GPVTTPEHQL
ASPAASHPLASSPLSGPPSP	1.28	AHT	-0.01	-0.16	-0.22	0.5	1828.27	ASPAASHPLA
PRLAPQLPPASSQPRAPL	1.49	AHT	-0.19	-0.58	0.01	2	1896.47	PRLAPQLPPA
RPPAPRSPGLPASSAH	1.08	AHT	-0.23	-0.86	0.19	2.5	1598	RPPAPRSPGL
SSGTPASSSSSHKTPASC	1.11	AHT	-0.19	-0.69	0.12	1.5	1678.97	SSGTPASSSS
SGPPPPGAYPHPLESGGSHHAH	1.55	AHT	-0.08	-1.08	-0.15	1	2186.65	SGPPPPGAYP
GYMVEPEWSLYPPPSHAYADS	1.43	AHT	-0.05	-0.68	-0.31	-2.5	2396.9	GYMVEPEWSL
LEHDPHDSLGHGLGSEPSP	1.12	AHT	-0.15	-1.08	0.32	-2.5	1981.35	LEHDPHDSLG
PPSTGNSASLSLPLVLQPGLSEPP	2.06	AHT	0	-0.03	-0.27	-1	2359.03	PPSTGNSASL
GPPGPPGLPGPPGPKGAKGSSGPTGP	1.31	AHT	-0.05	-0.93	0.15	2	2218.88	GPPGPPGLPG
GRSQGSPAQPSPATG	0.96	AHT	-0.22	-1.13	0.19	1	1397.67	GRSQGSPAQP
PIPVKSNPSGTRPGH	1.44	AHT	-0.22	-1.06	0.17	2.5	1543.96	PIPVKSNPSG
QPVTSGTAISSASLVSSQ	0.92	AHT	-0.02	0.28	-0.34	0	1720.12	QPVTSGTAIS
LPKEPKSTALRSEDSSIKPPEP	1.57	AHT	-0.33	-1.28	0.86	0	2407.02	LPKEPKSTAL
WAPPLDSPGTPSPDGPWCCS	1.33	AHT	-0.04	-0.59	-0.23	-2	2070.54	WAPPLDSPGT
QSPAPTPTPTPTLSPASAPTPAPTPA	1.11	AHT	-0.06	-0.51	-0.22	0	2454.07	QSPAPTPTPT
EMAPIRIFHKEPPSPSH	1.07	AHT	-0.18	-0.84	0.22	1	1973.52	EMAPIRIFHK
FSEEKRRQLQEERPELSESEL	1.44	AHT	-0.51	-1.84	1.26	-3	2620.13	FSEEKRRQLQ
HLRCHTGERPYP	1.34	AHT	-0.38	-1.52	0.21	2	1465.82	HLRCHTGERP
PVVATPIKAEMPSPGAPAPSSGQQPH	1.33	AHT	-0.06	-0.41	-0.07	0.5	2552.27	PVVATPIKAE
KTQPPNAPAPAPPPGPLPT	1.29	AHT	-0.1	-0.94	-0.04	1	1848.39	KTQPPNAPAP
PQASPSRTRSPDVISSAST	1	AHT	-0.28	-0.77	0.31	1	1944.33	PQASPSRTRS
CELMCLAPPPVPN	1.03	AHT	0.05	0.55	-0.44	-1	1383.88	CELMCLAPPP
SSVLQSHGPSDTPQPLSDFDTD	1.08	AHT	-0.19	-0.92	0.23	-3.5	2330.71	SSVLQSHGPS
PSAPPAVPSGLPPSATPSPVPFGPT	1.65	AHT	0.05	-0.04	-0.34	0	2325.98	PSAPPAVPSG
KPSFQKPSTSAFPAPVPLN	1.87	AHT	-0.11	-0.46	-0.13	2	2013.58	KPSFQKPSTS
YPSTSEDTLGITWQSPGTWASL	1.73	AHT	-0.04	-0.44	-0.42	-2	2397.9	YPSTSEDTLG
PGLQGPPGEVGDPGPRGVLGDPGAPG	1.36	AHT	-0.04	-0.6	0.2	-2	2350.97	PGLQGPPGEV
SVSSPSWRGAPQHYYSPIN	1.35	AHT	-0.15	-0.89	-0.39	1.5	2133.57	SVSSPSWRGA
PFEGSGPGCGQRRSSSSTGST	1.18	AHT	-0.26	-1.05	0.32	1	2042.41	PFEGSGPGCG
QITIGPQRPVPSGPAGG	1.01	AHT	-0.06	-0.35	-0.14	1	1632.11	QITIGPQRPV
MLPPGQQPPGVYPGQPPMTYPG	1.74	AHT	-0.02	-0.75	-0.47	0	2310.02	MLPPGQQPPG
GHFVGPRGPHPGQFEGP	1.55	AHT	-0.09	-0.97	-0.08	1	1773.2	GHFVGPRGPH
PSPSWSSRASFSSFDTTDE	1.13	AHT	-0.23	-0.98	0.23	-2	2091.36	PSPSWSSRAS
EEPAQTSYTDSAADTSCTEEPAQTSCTE	1.31	AHT	-0.25	-1.11	0.5	-7	2953.34	EEPAQTSYTD
GCQPEHYSPVCGSDGLMYYSPCYAG	0.98	AHT	-0.04	-0.34	-0.43	-1.5	2685.32	GCQPEHYSPV
LTYFKRKYVEEEDFHPPLSSCSHK	0.93	AHT	-0.28	-1.07	0.32	1	2941.65	LTYFKRKYVE
SPWALPFPPLWPHSTTTTSPSLPLFW	2	AHT	0.08	-0.02	-0.92	0.5	2964.79	SPWALPFPPL
DFAPGDGGDLQETAKVSEIEEEQEDPY	1.01	AHT	-0.23	-1.27	0.83	-9	2969.42	DFAPGDGGDL
HASPGPPPNPGAVY	1.8	AHT	-0.02	-0.7	-0.34	0.5	1360.68	HASPGPPPNP
LSAPEKLGMEIGKVPPPLPG	1	AHT	-0.01	-0.05	0.09	0	2030.76	LSAPEKLGME
EMATTEARSGSGQSECKTTT	0.98	AHT	-0.3	-1.05	0.54	-1	2075.48	EMATTEARSG
PEVLNVESLPPAHSEGPSSAEG	1.62	AHT	-0.09	-0.52	0.24	-3.5	2203.66	PEVLNVESLP
LHLEDDDSSDEEYQPDDEEE	1.37	AHT	-0.43	-2.28	1.52	-11.5	2409.55	LHLEDDDSSD
GSQEAQGGSSNGPYSNPYENSLIPAPKP	1.26	AHT	-0.17	-1.17	0.08	-1	2847.41	GSQEAQGGSS
EPFQPLIWPSETSPPNMSLQVIEETN	1.64	AHT	-0.09	-0.58	-0.12	-4	2984.72	EPFQPLIWPS
TEDSDEEWTPRQQGKPSGMAFRGEPSKHP	1.17	AHT	-0.37	-1.86	0.77	-1.5	3285.92	TEDSDEEWTP
EKPASSLPSSPPLPPQLLTRNLVL	1.86	AHT	-0.1	-0.15	-0.11	1	2555.37	EKPASSLPSS
PIEDIPEVHPDLQK	1.15	AHT	-0.18	-0.89	0.56	-2.5	1630.04	PIEDIPEVHP
PPSPASSKASVTEDDVSSCLET	1.06	AHT	-0.17	-0.48	0.42	-3	2207.63	PPSPASSKAS
THTSVTVPSSTVTMERTSTSTSV	1.2	AHT	-0.15	-0.2	-0.14	0.5	2396.93	THTSVTVPSS
KMGYTETSLQEHVTSEHAET	1.27	AHT	-0.23	-1.11	0.29	-2	2278.73	KMGYTETSLQ
STGCPKALESSPSGF	1.41	AHT	-0.09	-0.29	0.07	0	1467.81	STGCPKALES
LGELSGSLSLSSAEP	1.14	AHT	0.01	0.24	-0.01	-2	1446.79	LGELSGSLSL
QLQPPRPPTTGGSEGMAAPHCP	1.05	AHT	-0.15	-0.88	0.01	0.5	2229.83	QLQPPRPPTT
LKLSQKTIVQTPGPIVQYTGP	0.91	AHT	-0.06	-0.15	-0.32	2	2269.02	LKLSQKTIVQ
SRSYRSSDGRTTPQLGS	1.38	AHT	-0.44	-1.52	0.52	2	1855.18	SRSYRSSDGR
PSPLMIHSPQIPQFQSLTHQSPPQQNV	1.11	AHT	-0.12	-0.7	-0.42	1	3037.87	PSPLMIHSPQ
GPATPTASSPQSPGDAAPEL	0.95	AHT	-0.08	-0.6	0.12	-2	1851.22	GPATPTASSP
TFTHSSSSHSQEMLGKL	0.99	AHT	-0.16	-0.64	-0.09	1	1877.31	TFTHSSSSHS
PASPGSPVSPGSAQRTPWS	1.52	AHT	-0.13	-0.77	-0.08	1	1866.27	PASPGSPVSP
LQLSQTPGPNSPIFLPSD	1.4	AHT	-0.05	-0.29	-0.31	-1	1911.41	LQLSQTPGPN
ESFSSEQEASDDAVQGQDLDE	1.08	AHT	-0.29	-1.32	0.9	-8	2286.5	ESFSSEQEAS
STGPPPQPEDTMTLPASGVPHV	1.54	AHT	-0.07	-0.54	-0.07	-1.5	2215.78	STGPPPQPED
SYVFSPESEVSAASISEDTLK	0.91	AHT	-0.1	-0.15	0.19	-3	2246.69	SYVFSPESEV
PVGQMGPVGAPGRPGPPGPPGPKG	1.5	AHT	-0.05	-0.72	0.06	2	2161.87	PVGQMGPVGA
TFSSPSASSVQSLPPQV	1.58	AHT	-0.05	-0.03	-0.35	0	1719.11	TFSSPSASSV
QSSPLPTLDTGCLFHGEEH	1.44	AHT	-0.1	-0.56	-0.05	-2	2068.53	QSSPLPTLDT
TSGQVPTTFLPASTSQ	2.07	AHT	-0.06	-0.2	-0.41	0	1621.99	TSGQVPTTFL
ELPEPLFTDEFYP	1.52	AHT	-0.05	-0.58	0.05	-4	1596.93	ELPEPLFTDE
SPGGVPSPSASPPRVTSMAST	1.03	AHT	-0.09	-0.27	-0.06	1	1970.46	SPGGVPSPSA
QSTNQDSYGSSPGKAPQGP	1.29	AHT	-0.27	-1.62	0.25	0	1906.22	QSTNQDSYGS
SPVEKVPEESVLPLVQKSAQAESS	0.96	AHT	-0.16	-0.4	0.39	-2	2539.18	SPVEKVPEES
ATLSKRKKPSPGQQVLESFFWP	0.92	AHT	-0.21	-0.76	0.09	3	2532.26	ATLSKRKKPS
VMNSEAKVLVPGIPGHHAAVKPPPP	1	AHT	-0.01	0	-0.16	2	2543.4	VMNSEAKVLV
EPSGTQSEGGGSSSSGTGSPGP	1.19	AHT	-0.15	-1.14	0.34	-2	1907.16	EPSGTQSEGG
EIHPESTSKDEECYSE	2	AHT	-0.35	-1.69	0.99	-4.5	1883.14	EIHPESTSKD
LNNSLPAGQTQPYE	1.07	AHT	-0.17	-1.04	-0.19	-1	1531.85	LNNSLPAGQT
SAPDQLTETTEEGK	1.43	AHT	-0.31	-1.48	0.86	-3	1505.75	SAPDQLTETT
RSPAPSTRSVTSVSSRERGFEN	1.05	AHT	-0.4	-1.15	0.6	2	2407.87	RSPAPSTRSV
KASPEERDGVYDVPLHQPPE	1.13	AHT	-0.29	-1.38	0.67	-2.5	2263.73	KASPEERDGV
HQHSSHLPPDAPLSDPEK	1.34	AHT	-0.27	-1.49	0.42	-0.5	1992.39	HQHSSHLPPD
SYPPPAVPPGGQPPVPPPIPP	1.37	AHT	0.03	-0.52	-0.34	0	2058.7	SYPPPAVPPG
AMDPPPPKAPPFPPAEGPAST	0.91	AHT	-0.07	-0.73	0.15	-1	2072.63	AMDPPPPKAP
TCLSMSTLESVTYLP	1.27	AHT	0.03	0.61	-0.59	-1	1645.13	TCLSMSTLES
GCLEPPATQDPQAPPP	1.45	AHT	-0.13	-0.92	0.14	-2	1618.01	GCLEPPATQD
CPSDHWNYTSCSPKEEAYISC	1.24	AHT	-0.19	-0.85	-0.04	-1.5	2420.9	CPSDHWNYTS
QQVQTQSPTQPSPAPGPGLQS	1.68	AHT	-0.19	-1.13	-0.12	0	2133.62	QQVQTQSPTQ
LMEESFETFQDEMGFSSM	1.03	AHT	-0.09	-0.37	0.14	-5	2145.61	LMEESFETFQ
YNKNQQIKIPPGTPIYEC	1.1	AHT	-0.19	-0.99	-0.09	1	2106.7	YNKNQQIKIP
PTSSPPTPGGLPPAGR	1.25	AHT	-0.11	-0.79	0.03	1	1488.88	PTSSPPTPGG
PTRASEYLPCSGS	1.94	AHT	-0.19	-0.61	0.07	0	1367.66	PTRASEYLPC
HGTPTHQNKPQTLDPFA	1.16	AHT	-0.23	-1.36	-0.02	1	1889.31	HGTPTHQNKP
GFPGTPGLPGPKGIS	1.09	AHT	0.06	-0.18	-0.21	1	1381.82	GFPGTPGLPG
GSHFEFPDYCTPEVSEMISGDW	1	AHT	-0.06	-0.51	-0.06	-4.5	2534.03	GSHFEFPDYC
STATKASAPPSTSRCTGSR	1.12	AHT	-0.31	-0.81	0.34	3	1866.27	STATKASAPP
AMAPPPAVLPGVQPQ	1.43	AHT	0.07	0.27	-0.48	0	1472.98	AMAPPPAVLP
PPPELMDVSLVGGPP	1.47	AHT	0.05	0.09	-0.11	-2	1504.98	PPPELMDVSL
PRCLTDPSCGPGPQGSSPDGPPA	1.16	AHT	-0.17	-0.88	0.23	-1	2193.7	PRCLTDPSCG
KESSDSPPSANSPEAASPTEQ	1.59	AHT	-0.3	-1.5	0.73	-3	2116.4	KESSDSPPSA
FSHRGEIFGTCGEEQ	1.04	AHT	-0.18	-0.79	0.25	-1.5	1697.03	FSHRGEIFGT
LRPALPRVASRLVPPEL	1.11	AHT	-0.16	0.18	0.06	2	1884.54	LRPALPRVAS
GVTAVEVPPEPPGCSSG	1.63	AHT	0.01	0	0.01	-2	1582.98	GVTAVEVPPE
QPLPPAPLAMPHIKPP	1.29	AHT	-0.01	-0.26	-0.31	1.5	1704.34	QPLPPAPLAM
PSQYFSAEIPLHPY	2.19	AHT	-0.02	-0.45	-0.56	-0.5	1649.03	PSQYFSAEIP
PQELHDPYKHLKLE	0.9	AHT	-0.3	-1.52	0.46	0	1747.2	PQELHDPYKH
PLQSKATPGPATPPKATPGPATPPK	1.33	AHT	-0.15	-0.92	0.16	3	2408.14	PLQSKATPGP
SHEEMHNTAPPGPGHRHGPGYGKG	0.9	AHT	-0.23	-1.65	0.25	2	2508.05	SHEEMHNTAP
THEMFKVQQAEISQTVSPGE	0.99	AHT	-0.16	-0.68	0.14	-1.5	2246.78	THEMFKVQQA
PTLPAPLTPRGASPAASSPPP	1.21	AHT	-0.06	-0.32	-0.12	1	1982.54	PTLPAPLTPR
RPPLSALAPPHSSPDP	1.28	AHT	-0.16	-0.75	0.11	0.5	1639.05	RPPLSALAPP
PPPHIIALPGSTVPAKSPV	1.44	AHT	0.06	0.28	-0.35	1.5	1878.52	PPPHIIALPG
TTSPVSTRVPHRTNSVPTSHC	1.54	AHT	-0.26	-0.73	-0.05	3	2264.79	TTSPVSTRVP
LLPPPDPLVPLASL	1.54	AHT	0.15	0.91	-0.55	-1	1441.98	LLPPPDPLVP
SSHVFHVKPPPHA	1.33	AHT	-0.08	-0.53	-0.3	2.5	1439.82	SSHVFHVKPP
PSGWGDLAETEAPGPPH	0.98	AHT	-0.07	-0.96	0.13	-2.5	1718.05	PSGWGDLAET
EAEPPIKSCVHEEQTGG	1.75	AHT	-0.2	-1.01	0.58	-2.5	1811.2	EAEPPIKSCV
PTDYQGPPGPEGPRGLP	1.52	AHT	-0.19	-1.44	0.28	-1	1735.13	PTDYQGPPGP
TLGPDPSEQILLVEVPEKQEEKE	1.45	AHT	-0.22	-0.94	0.74	-5	2608.25	TLGPDPSEQI
EKAPPKKYAIKPPRD	1.12	AHT	-0.44	-1.78	1.06	3	1738.26	EKAPPKKYAI
LEIGSITVTAPSSLQE	0.92	AHT	0.02	0.39	-0.18	-2	1645.08	LEIGSITVTA
SITPYIASPVSAYQVQSPSWMQPQPY	1.74	AHT	-0.03	-0.33	-0.67	0	2926.67	SITPYIASPV
PSVIGPPGPPGPHGPPGPMGPH	1.32	AHT	0.03	-0.68	-0.24	1	2036.67	PSVIGPPGPP
QQGPPSGPQQGHGYPGQPY	1.47	AHT	-0.19	-1.79	-0.2	0.5	1980.38	QQGPPSGPQQ
GLPGPRGPPGPAGEKGAKGSP	1.1	AHT	-0.15	-1.03	0.45	2	1884.43	GLPGPRGPPG
YTPRLTQVLSSSAASSTITALSP	1.58	AHT	-0.05	0.23	-0.4	1	2351.96	YTPRLTQVLS
GDTDTGPGESETCDSV	1.07	AHT	-0.22	-1.08	0.74	-5	1569.74	GDTDTGPGES
HRCFHYPYQPLCPRC	1.16	AHT	-0.26	-0.81	-0.45	3	1920.46	HRCFHYPYQP
LQSQPSPLTEDRESQEEV	1.74	AHT	-0.36	-1.5	0.78	-4	2072.43	LQSQPSPLTE
PGPPSMPHVCPHRQHLHTVQGL	1.54	AHT	-0.13	-0.65	-0.35	3	2426.16	PGPPSMPHVC
SPPPPPPPPTLLSSGHPVPT	1.42	AHT	-0.02	-0.58	-0.28	0.5	1972.55	SPPPPPPPPT
GPAGGSGGGGSGGGGGGQPP	0.94	AHT	0.05	-0.67	0.01	0	1424.72	GPAGGSGGGG
LPETIPETGQLEGQTPS	1.64	AHT	-0.13	-0.82	0.18	-3	1797.21	LPETIPETGQ
PYTSRGSTPYSQDSAY	1.97	AHT	-0.27	-1.36	-0.05	0	1780.04	PYTSRGSTPY
VVFLQPTSLTLLYPLASPSNS	1.85	AHT	0.08	0.68	-0.79	0	2247.93	VVFLQPTSLT
QSTISPSTSYSLKPHSVPSVSR	1.45	AHT	-0.19	-0.56	-0.07	2.5	2345.9	QSTISPSTSY
GGPSAPGLRPPGSSPKR	1	AHT	-0.25	-1.14	0.45	3	1618.06	GGPSAPGLRP
PTGQQGGTRKLWEIPPYETK	1.16	AHT	-0.26	-1.41	0.25	1	2286.88	PTGQQGGTRK
NKIPSLCPGHPGLP	1.33	AHT	-0.04	-0.29	-0.24	1.5	1429.91	NKIPSLCPGH
GPPGEPGLPGIPGPMGPP	1.23	AHT	0.07	-0.47	-0.11	-1	1624.16	GPPGEPGLPG
ALDFQPSSPSPHRKPST	1.54	AHT	-0.28	-1.21	0.28	1.5	1852.26	ALDFQPSSPS
PLSPSLLGGPGPERTPGSGT	1.48	AHT	-0.07	-0.52	0.04	0	1877.38	PLSPSLLGGP
PSPCLHNGSCSETPGLGGPGFRC	1.12	AHT	-0.09	-0.36	-0.13	0.5	2273.87	PSPCLHNGSC
KLTVAGLPRFASQPEPSSVY	1.31	AHT	-0.1	-0.13	-0.13	1	2147.74	KLTVAGLPRF
WSPLGPPSSPYGAAFTAEKPNSPM	1.26	AHT	-0.05	-0.56	-0.24	0	2490.11	WSPLGPPSSP
LPPNSETGTSLYSRISVTAAPSS	1.7	AHT	-0.1	-0.22	-0.15	0	2335.87	LPPNSETGTS
TSSPQSPPASPTSGPSNSSV	1.51	AHT	-0.16	-0.86	0	0	1872.19	TSSPQSPPAS
PSPRTLKTHLPVQMLPPSFWKENAK	1.07	AHT	-0.2	-0.79	0	3.5	2903.81	PSPRTLKTHL
SDDDEQGSSSPKENSSEDQSSKASENTE	0.98	AHT	-0.46	-2.19	1.27	-7	2975.19	SDDDEQGSSS
TVPKSPNIQQSPAHETGQGL	1.46	AHT	-0.18	-0.94	0.03	0.5	2089.6	TVPKSPNIQQ
LVTLPHPNLHGPEILDVPST	1.12	AHT	0.02	0.11	-0.36	-1	2149.79	LVTLPHPNLH
SSLPLPTPSPTEPPP	1.41	AHT	-0.08	-0.73	-0.03	-1	1516.91	SSLPLPTPSP
PTYTIPLIPIANSSQFKHQE	1.11	AHT	-0.08	-0.41	-0.33	0.5	2284.9	PTYTIPLIPI
VTPPLELRPPPIPVSPE	1.61	AHT	-0.06	-0.22	0.03	-1	1838.42	VTPPLELRPP
ELEEEVKEMMKQRPPAPPRP	1.38	AHT	-0.4	-1.61	1.04	-1	2392.07	ELEEEVKEMM
WCQCVAWSSSGTTK	1.17	AHT	-0.08	-0.17	-0.54	1	1543.92	WCQCVAWSSS
ERSPASPAPPSPSPRWSRSED	1.11	AHT	-0.4	-1.7	0.73	0	2293.69	ERSPASPAPP
SSTYGHHGSTSGQSSSCGQNIS	1.04	AHT	-0.17	-0.94	-0.18	1	2169.5	SSTYGHHGST
TSEASPVSNLPLTSETSPMSDL	1.57	AHT	-0.1	-0.29	0.05	-3	2263.76	TSEASPVSNL
PSVNPSISPAHGVARSSTLPPSN	1.07	AHT	-0.11	-0.36	-0.14	1.5	2272.82	PSVNPSISPA
NYSPPPAKHHTSGKP	1.97	AHT	-0.28	-1.75	0.17	3	1617.99	NYSPPPAKHH
PDPVLEPLSPTGLLELKPSSPLILKG	1.13	AHT	-0.01	0.13	-0.02	-1	2711.64	PDPVLEPLSP
TPQTPLRTPERLQKSPAEMTPAK	0.91	AHT	-0.34	-1.27	0.49	2	2578.31	TPQTPLRTPE
SQIVSTPPTRATASG	0.96	AHT	-0.13	-0.25	-0.09	1	1472.82	SQIVSTPPTR
LGTYGTEIYQSHGPSGQY	1.23	AHT	-0.08	-0.86	-0.43	-0.5	1958.35	LGTYGTEIYQ
AQSAQQPPPPPPPPPQLSPA	1.31	AHT	-0.13	-1.12	-0.1	0	2002.53	AQSAQQPPPP
WTASSTAQPFPENPHP	1.73	AHT	-0.13	-1.1	-0.26	-0.5	1767.1	WTASSTAQPF
HVAKPPSSQNSFLS	0.94	AHT	-0.15	-0.56	-0.16	1.5	1498.85	HVAKPPSSQN
SGPKGEQGITGPSGPIGPPGPPGL	1.38	AHT	-0.01	-0.62	0.04	0	2154.78	SGPKGEQGIT
GRAKTQIVVTGPPPQLVPVPNVTVSPGET	1.19	AHT	-0.06	-0.05	-0.17	1	2939.85	GRAKTQIVVT
PLGKEGPPGPRGFPGPHGAPGDPGPTG	1.28	AHT	-0.1	-1.07	0.23	0.5	2504.16	PLGKEGPPGP
TPYAGATPGGTGVTSTLPPPPQGPGLAL	1.24	AHT	0.05	-0.06	-0.44	0	2576.32	TPYAGATPGG
VPGQGHSEGLPAKVPGR	1.17	AHT	-0.15	-0.69	0.22	1.5	1686.16	VPGQGHSEGL
FPHLPGTPRPAPSTPP	1.24	AHT	-0.11	-0.82	-0.18	1.5	1669.13	FPHLPGTPRP
SVPVQTLTDLPGQS	1.23	AHT	-0.06	-0.08	-0.24	-1	1441.81	SVPVQTLTDL
LYPPAYGPLPGLSLP	1.94	AHT	0.14	0.32	-0.8	0	1555.07	LYPPAYGPLP
APPVSFPAAHPPGGPGTPCAGVL	1.22	AHT	0.11	0.31	-0.47	0.5	2097.74	APPVSFPAAH
QPGLPPVPGAPGMPPGIPPLMPGVP	1.53	AHT	0.12	0.12	-0.45	0	2371.28	QPGLPPVPGA
DNPPELLMSSLTSPIQE	1.13	AHT	-0.11	-0.45	0.08	-3	1871.34	DNPPELLMSS
YAKDGLPGSPGPQGETGPAGHPGPPG	1.28	AHT	-0.08	-1.05	0.13	-0.5	2398.96	YAKDGLPGSP
PSPPTQDSPEPRIPSPAAQA	1.27	AHT	-0.22	-1.15	0.33	-1	2043.48	PSPPTQDSPE
GEPVVEVLSRPRP	0.91	AHT	-0.22	-0.43	0.46	0	1434.84	GEPVVEVLSR
PRVPLPLPPTYRRVHS	1.81	AHT	-0.27	-0.72	-0.03	3.5	1885.47	PRVPLPLPPT
QNLEEDDDESEEDNSES	0.98	AHT	-0.52	-2.59	1.75	-10	1984.02	QNLEEDDDES
WTVEQPLSWFSGPLGSSWDT	1.56	AHT	0	-0.36	-0.56	-2	2280.77	WTVEQPLSWF
ERKTHVTRHGTYEGSSSGNSS	1.31	AHT	-0.39	-1.63	0.51	2	2277.65	ERKTHVTRHG
ATTQAPMSPSSKPSLPFQSSHTMG	1.23	AHT	-0.12	-0.58	-0.18	1.5	2476.11	ATTQAPMSPS
PCQGQDCQDRWFSTPWSP	1.35	AHT	-0.25	-1.31	-0.08	-1	2138.56	PCQGQDCQDR
