# Supplementary material for: Peptide profiling in cow urine reveals molecular signature of physiology-driven pathways and in-silico predicted bioactive properties
Source: Sci Rep. 2021 Jun 14;11:12427. doi: 10.1038/s41598-021-91684-4 (PMC8203733; doi:10.1038/s41598-021-91684-4)
Supplement: Supplementary file 3 — Supplementary Information. [file 41598_2021_91684_MOESM3_ESM.xlsx]

## Sheet: cover
		Comprehensive profiling of urinary peptides in cow reveals physiology specific signatures and several bioactive properties
		Rohit Kumar, Syed Azmal Ali, Sumit Kumar Singh, Vanya Bhushan, Jai Kumar Kaushik, Ashok Kumar Mohanty, and Sudarshan Kumar
		Supplementary table 3: Table enlisting number of peptide sequences obtained from a particular protease cleavage (Manual curation & Proteasix based prediction)

## Sheet: HEIFER
Peptide ID	Parent Protein AC from input	Start amino acid	End amino acid	N or C-terminus	Protease Human/Mouse/Rat	Cleavage site	Source	Plausible proteolysis	Probability Calculated	Threshold applied (value)	Sensitivity	Specificity		HEIFER
EEFQPDLVVLSGLHMMEGQ	A2VE47	251	269	N-terminus	CTSD (P07339; CATD_HUMAN). Ctsd (P18242; CATD_MOUSE). Ctsd (P24268; CATD_RAT)	VSSLEEFQ	MEROPS:A01.009	Endopeptidase (input)	-20.46	MEROPS score threshold (-22.64)	79	84.74		CTSD
AGKNEEPSSHHIPHGKE	A2VE10	225	241	N-terminus	CTSD (P07339; CATD_HUMAN). Ctsd (P18242; CATD_MOUSE). Ctsd (P24268; CATD_RAT)	AENGAGKN	MEROPS:A01.009	Endopeptidase (input)	-22.15	MEROPS score threshold (-22.64)	79	84.74		CTSD
DALVVPVGGGGMLAGIAVT	A0JNI4	178	196	C-terminus	CTSD (P07339; CATD_HUMAN). Ctsd (P18242; CATD_MOUSE). Ctsd (P24268; CATD_RAT)	IAVTVKAL	MEROPS:A01.009	Endopeptidase (input)	-22.32	MEROPS score threshold (-22.64)	79	84.74		CTSD
MAGLGGEPIPDGEF	A2VE45	1	14	C-terminus	CTSD (P07339; CATD_HUMAN). Ctsd (P18242; CATD_MOUSE). Ctsd (P24268; CATD_RAT)	DGEFTAVV	MEROPS:A01.009	Endopeptidase (input)	-20.4	MEROPS score threshold (-22.64)	79	84.74		CTSD
RSAEGQWEAQPALES	A4FV37	214	228	C-terminus	CTSD (P07339; CATD_HUMAN). Ctsd (P18242; CATD_MOUSE). Ctsd (P24268; CATD_RAT)	ALESKLEP	MEROPS:A01.009	Endopeptidase (input)	-22.13	MEROPS score threshold (-22.64)	79	84.74		CTSD
SLSPGAASSSSGDGDGKEG	A4FV57	133	151	C-terminus	CTSD (P07339; CATD_HUMAN). Ctsd (P18242; CATD_MOUSE). Ctsd (P24268; CATD_RAT)	GKEGLEEP	MEROPS:A01.009	Endopeptidase (input)	-21.78	MEROPS score threshold (-22.64)	79	84.74		CTSD
GGLGERVLGFCQLNLPSAK	A2VDL6	543	561	N-terminus	CTSD (P07339; CATD_HUMAN). Ctsd (P18242; CATD_MOUSE). Ctsd (P24268; CATD_RAT)	YLELGGLG	MEROPS:A01.009	Endopeptidase (input)	-20.41	MEROPS score threshold (-22.64)	79	84.74		CTSD
VAPGPGLAPPAQPGAP	A2VE44	350	365	N-terminus	CTSD (P07339; CATD_HUMAN). Ctsd (P18242; CATD_MOUSE). Ctsd (P24268; CATD_RAT)	LVSTVAPG	MEROPS:A01.009	Endopeptidase (input)	-22.32	MEROPS score threshold (-22.64)	79	84.74		CTSD
LYSSKKKIFMGL	A2VE44	514	525	N-terminus	CTSD (P07339; CATD_HUMAN). Ctsd (P18242; CATD_MOUSE). Ctsd (P24268; CATD_RAT)	VLMLLYSS	MEROPS:A01.009	Endopeptidase (input)	-20.88	MEROPS score threshold (-22.64)	79	84.74		CTSD
VLLSGVIAFMVNLS	A4IFK2	227	240	N-terminus	CTSD (P07339; CATD_HUMAN). Ctsd (P18242; CATD_MOUSE). Ctsd (P24268; CATD_RAT)	ALLMVLLS	MEROPS:A01.009	Endopeptidase (input)	-20.12	MEROPS score threshold (-22.64)	79	84.74		CTSD
AILNVGAPAAG	A1A4J1	403	413	N-terminus	CTSD (P07339; CATD_HUMAN). Ctsd (P18242; CATD_MOUSE). Ctsd (P24268; CATD_RAT)	NFSLAILN	MEROPS:A01.009	Endopeptidase (input)	-21.05	MEROPS score threshold (-22.64)	79	84.74		CTSD
QRSLVLFSVGVVLAL	A0JNC3	85	99	C-terminus	CTSD (P07339; CATD_HUMAN). Ctsd (P18242; CATD_MOUSE). Ctsd (P24268; CATD_RAT)	VLALVLNL	MEROPS:A01.009	Endopeptidase (input)	-18.11	MEROPS score threshold (-22.64)	79	84.74		CTSD
YQAHSFVSAF	A5PJL1	100	109	C-terminus	CTSD (P07339; CATD_HUMAN). Ctsd (P18242; CATD_MOUSE). Ctsd (P24268; CATD_RAT)	VSAFIGGL	MEROPS:A01.009	Endopeptidase (input)	-19.42	MEROPS score threshold (-22.64)	79	84.74		CTSD
AAAEAASSSMTKGKE	A6QP11	108	122	N-terminus	CTSD (P07339; CATD_HUMAN). Ctsd (P18242; CATD_MOUSE). Ctsd (P24268; CATD_RAT)	SESGAAAE	MEROPS:A01.009	Endopeptidase (input)	-21.28	MEROPS score threshold (-22.64)	79	84.74		CTSD
SRSTSTGSAASSGSNSS	A5D992	112	128	N-terminus	CTSD (P07339; CATD_HUMAN). Ctsd (P18242; CATD_MOUSE). Ctsd (P24268; CATD_RAT)	GPILSRST	MEROPS:A01.009	Endopeptidase (input)	-22.25	MEROPS score threshold (-22.64)	79	84.74		CTSD
AVGAMKELVER	A6QPE1	55	65	C-terminus	CTSD (P07339; CATD_HUMAN). Ctsd (P18242; CATD_MOUSE). Ctsd (P24268; CATD_RAT)	LVERFALY	MEROPS:A01.009	Endopeptidase (input)	-22.07	MEROPS score threshold (-22.64)	79	84.74		CTSD
LPGKKVTTEDVE	A5D7R1	303	314	C-terminus	CTSD (P07339; CATD_HUMAN). Ctsd (P18242; CATD_MOUSE). Ctsd (P24268; CATD_RAT)	EDVEKTVK	MEROPS:A01.009	Endopeptidase (input)	-20.93	MEROPS score threshold (-22.64)	79	84.74		CTSD
GQVSPPASNMEYMTWDEE	A6QLZ7	68	85	C-terminus	CTSD (P07339; CATD_HUMAN). Ctsd (P18242; CATD_MOUSE). Ctsd (P24268; CATD_RAT)	WDEELEKS	MEROPS:A01.009	Endopeptidase (input)	-22.44	MEROPS score threshold (-22.64)	79	84.74		CTSD
AVFANCAGMLVVVF	A5D9A7	197	210	N-terminus	CTSD (P07339; CATD_HUMAN). Ctsd (P18242; CATD_MOUSE). Ctsd (P24268; CATD_RAT)	LPSEAVFA	MEROPS:A01.009	Endopeptidase (input)	-21.55	MEROPS score threshold (-22.64)	79	84.74		CTSD
AVFANCAGMLVVVF	A5D9A7	197	210	C-terminus	CTSD (P07339; CATD_HUMAN). Ctsd (P18242; CATD_MOUSE). Ctsd (P24268; CATD_RAT)	VVVFGLLV	MEROPS:A01.009	Endopeptidase (input)	-20.31	MEROPS score threshold (-22.64)	79	84.74		CTSD
EGRLWAESKGFLYF	A5D7F5	148	161	C-terminus	CTSD (P07339; CATD_HUMAN). Ctsd (P18242; CATD_MOUSE). Ctsd (P24268; CATD_RAT)	FLYFETSA	MEROPS:A01.009	Endopeptidase (input)	-20.21	MEROPS score threshold (-22.64)	79	84.74		CTSD
HSYYQGLFSTAVL	A5PK74	263	275	C-terminus	CTSD (P07339; CATD_HUMAN). Ctsd (P18242; CATD_MOUSE). Ctsd (P24268; CATD_RAT)	TAVLDSIL	MEROPS:A01.009	Endopeptidase (input)	-20.4	MEROPS score threshold (-22.64)	79	84.74		CTSD
LSAATTFEPLEPVKDTD	A5PJZ5	81	97	N-terminus	CTSD (P07339; CATD_HUMAN). Ctsd (P18242; CATD_MOUSE). Ctsd (P24268; CATD_RAT)	RLESLSAA	MEROPS:A01.009	Endopeptidase (input)	-21.55	MEROPS score threshold (-22.64)	79	84.74		CTSD
KTCKFVSGFMSELSPVRA	A5PJM5	332	349	C-terminus	CTSD (P07339; CATD_HUMAN). Ctsd (P18242; CATD_MOUSE). Ctsd (P24268; CATD_RAT)	PVRAELLG	MEROPS:A01.009	Endopeptidase (input)	-20.75	MEROPS score threshold (-22.64)	79	84.74		CTSD
HSVFALATHHCASVVS	A7E2Y6	1128	1143	C-terminus	CTSD (P07339; CATD_HUMAN). Ctsd (P18242; CATD_MOUSE). Ctsd (P24268; CATD_RAT)	SVVSNLLG	MEROPS:A01.009	Endopeptidase (input)	-22.04	MEROPS score threshold (-22.64)	79	84.74		CTSD
LGDLLAGISVGLVQIPQ	A6QNW6	91	107	N-terminus	CTSD (P07339; CATD_HUMAN). Ctsd (P18242; CATD_MOUSE). Ctsd (P24268; CATD_RAT)	KDWLLGDL	MEROPS:A01.009	Endopeptidase (input)	-22.5	MEROPS score threshold (-22.64)	79	84.74		CTSD
SDELADVGGALRGLNLS	A5PJQ2	218	234	N-terminus	CTSD (P07339; CATD_HUMAN). Ctsd (P18242; CATD_MOUSE). Ctsd (P24268; CATD_RAT)	VGALSDEL	MEROPS:A01.009	Endopeptidase (input)	-19.57	MEROPS score threshold (-22.64)	79	84.74		CTSD
RAESPSQGKPGEAGAE	E1BM58	709	724	C-terminus	CTSD (P07339; CATD_HUMAN). Ctsd (P18242; CATD_MOUSE). Ctsd (P24268; CATD_RAT)	AGAEVSGK	MEROPS:A01.009	Endopeptidase (input)	-20.86	MEROPS score threshold (-22.64)	79	84.74		CTSD
VTQSHWPSEPSEAV	O18738	26	39	N-terminus	CTSD (P07339; CATD_HUMAN). Ctsd (P18242; CATD_MOUSE). Ctsd (P24268; CATD_RAT)	LSVAVTQS	MEROPS:A01.009	Endopeptidase (input)	-20.19	MEROPS score threshold (-22.64)	79	84.74		CTSD
EALQGFARSVAAARGPAA	A7YY73	112	129	C-terminus	CTSD (P07339; CATD_HUMAN). Ctsd (P18242; CATD_MOUSE). Ctsd (P24268; CATD_RAT)	GPAALVAP	MEROPS:A01.009	Endopeptidase (input)	-21.05	MEROPS score threshold (-22.64)	79	84.74		CTSD
LTTSPQGHFVGSDWQ	E1BD59	617	631	N-terminus	Pgc (P04073; PEPC_RAT). PGC (P20142; PEPC_HUMAN). Pgc (Q9D7R7; PEPC_MOUSE)	ALVFLTTS	MEROPS:A01.003	Endopeptidase (input)	-18.2	99th percentile (-20.44)	100	99.53		Pgc
LTTSPQGHFVGSDWQ	E1BD59	617	631	N-terminus	CTSD (P07339; CATD_HUMAN). Ctsd (P18242; CATD_MOUSE). Ctsd (P24268; CATD_RAT)	ALVFLTTS	MEROPS:A01.009	Endopeptidase (input)	-18.39	MEROPS score threshold (-22.64)	79	84.74		CTSD
VINEMRRIARHFRFGNQ	E1B9W9	179	195	N-terminus	CTSD (P07339; CATD_HUMAN). Ctsd (P18242; CATD_MOUSE). Ctsd (P24268; CATD_RAT)	KPMFVINE	MEROPS:A01.009	Endopeptidase (input)	-22.61	MEROPS score threshold (-22.64)	79	84.74		CTSD
EFSVDIGRLAQE	A7Z050	1374	1385	C-terminus	CTSD (P07339; CATD_HUMAN). Ctsd (P18242; CATD_MOUSE). Ctsd (P24268; CATD_RAT)	LAQEASAI	MEROPS:A01.009	Endopeptidase (input)	-22.38	MEROPS score threshold (-22.64)	79	84.74		CTSD
ASLRAAKQADRRIKL	A7YW45	374	388	C-terminus	CTSD (P07339; CATD_HUMAN). Ctsd (P18242; CATD_MOUSE). Ctsd (P24268; CATD_RAT)	RIKLYAVE	MEROPS:A01.009	Endopeptidase (input)	-19.69	MEROPS score threshold (-22.64)	79	84.74		CTSD
FSELPEVLDQIQN	F1MCA7	196	208	N-terminus	CTSD (P07339; CATD_HUMAN). Ctsd (P18242; CATD_MOUSE). Ctsd (P24268; CATD_RAT)	GNNEFSEL	MEROPS:A01.009	Endopeptidase (input)	-21.96	MEROPS score threshold (-22.64)	79	84.74		CTSD
PLYITKVMSKSAA	O02675	249	261	C-terminus	CTSD (P07339; CATD_HUMAN). Ctsd (P18242; CATD_MOUSE). Ctsd (P24268; CATD_RAT)	KSAAEVIA	MEROPS:A01.009	Endopeptidase (input)	-21.3	MEROPS score threshold (-22.64)	79	84.74		CTSD
QVPLAHPMQMS	E1BPQ1	532	542	N-terminus	CTSD (P07339; CATD_HUMAN). Ctsd (P18242; CATD_MOUSE). Ctsd (P24268; CATD_RAT)	KTALQVPL	MEROPS:A01.009	Endopeptidase (input)	-22.52	MEROPS score threshold (-22.64)	79	84.74		CTSD
SHINASNSSEPSKM	E1BFR5	664	677	C-terminus	Pgc (P04073; PEPC_RAT). PGC (P20142; PEPC_HUMAN). Pgc (Q9D7R7; PEPC_MOUSE)	PSKMSITS	MEROPS:A01.003	Endopeptidase (input)	-20.37	99th percentile (-20.44)	100	99.53		Pgc
GTKGMGKETT	E1BP74	310	319	C-terminus	CTSD (P07339; CATD_HUMAN). Ctsd (P18242; CATD_MOUSE). Ctsd (P24268; CATD_RAT)	KETTLLLA	MEROPS:A01.009	Endopeptidase (input)	-21.34	MEROPS score threshold (-22.64)	79	84.74		CTSD
RSEPPSATPSPALSVESL	E1BBG2	487	504	C-terminus	Pgc (P04073; PEPC_RAT). PGC (P20142; PEPC_HUMAN). Pgc (Q9D7R7; PEPC_MOUSE)	VESLSSES	MEROPS:A01.003	Endopeptidase (input)	-19.83	99th percentile (-20.44)	100	99.53		Pgc
RSEPPSATPSPALSVESL	E1BBG2	487	504	C-terminus	CTSD (P07339; CATD_HUMAN). Ctsd (P18242; CATD_MOUSE). Ctsd (P24268; CATD_RAT)	VESLSSES	MEROPS:A01.009	Endopeptidase (input)	-18.75	MEROPS score threshold (-22.64)	79	84.74		CTSD
AGSGPAGVSSPRKGL	E1BBG2	108	122	C-terminus	CTSD (P07339; CATD_HUMAN). Ctsd (P18242; CATD_MOUSE). Ctsd (P24268; CATD_RAT)	RKGLVLSS	MEROPS:A01.009	Endopeptidase (input)	-20.84	MEROPS score threshold (-22.64)	79	84.74		CTSD
CMGNSFGVSPTMDKE	F1MSG6	194	208	N-terminus	CTSD (P07339; CATD_HUMAN). Ctsd (P18242; CATD_MOUSE). Ctsd (P24268; CATD_RAT)	AEILCMGN	MEROPS:A01.009	Endopeptidase (input)	-22.29	MEROPS score threshold (-22.64)	79	84.74		CTSD
DAGGQSQEPEVLGRT	A8E4N3	69	83	N-terminus	CTSD (P07339; CATD_HUMAN). Ctsd (P18242; CATD_MOUSE). Ctsd (P24268; CATD_RAT)	VDQEDAGG	MEROPS:A01.009	Endopeptidase (input)	-21.95	MEROPS score threshold (-22.64)	79	84.74		CTSD
AAPASTHTTAT	F1MCY2	248	258	C-terminus	CTSD (P07339; CATD_HUMAN). Ctsd (P18242; CATD_MOUSE). Ctsd (P24268; CATD_RAT)	TTATLSLT	MEROPS:A01.009	Endopeptidase (input)	-22.07	MEROPS score threshold (-22.64)	79	84.74		CTSD
DSEQGGEDPGKLSHATLKN	F1MCY2	96	114	N-terminus	CTSD (P07339; CATD_HUMAN). Ctsd (P18242; CATD_MOUSE). Ctsd (P24268; CATD_RAT)	LLLEDSEQ	MEROPS:A01.009	Endopeptidase (input)	-20.74	MEROPS score threshold (-22.64)	79	84.74		CTSD
GCHLPHTHSLPNRRVLTL	P05008	23	40	C-terminus	Pgc (P04073; PEPC_RAT). PGC (P20142; PEPC_HUMAN). Pgc (Q9D7R7; PEPC_MOUSE)	VLTLLRQL	MEROPS:A01.003	Endopeptidase (input)	-20.03	99th percentile (-20.44)	100	99.53		Pgc
GCHLPHTHSLPNRRVLTL	P05008	23	40	C-terminus	CTSD (P07339; CATD_HUMAN). Ctsd (P18242; CATD_MOUSE). Ctsd (P24268; CATD_RAT)	VLTLLRQL	MEROPS:A01.009	Endopeptidase (input)	-19.7	MEROPS score threshold (-22.64)	79	84.74		CTSD
AAEKKDSGPYKM	P01190	210	221	N-terminus	CTSD (P07339; CATD_HUMAN). Ctsd (P18242; CATD_MOUSE). Ctsd (P24268; CATD_RAT)	AEAEAAEK	MEROPS:A01.009	Endopeptidase (input)	-19.21	MEROPS score threshold (-22.64)	79	84.74		CTSD
AAVTAAAATAPAAEDAA	P06836	176	192	C-terminus	CTSD (P07339; CATD_HUMAN). Ctsd (P18242; CATD_MOUSE). Ctsd (P24268; CATD_RAT)	EDAAAMAT	MEROPS:A01.009	Endopeptidase (input)	-22.48	MEROPS score threshold (-22.64)	79	84.74		CTSD
LTSAPVPSTTTRSLTACP	P08037	118	135	N-terminus	Pgc (P04073; PEPC_RAT). PGC (P20142; PEPC_HUMAN). Pgc (Q9D7R7; PEPC_MOUSE)	PGSNLTSA	MEROPS:A01.003	Endopeptidase (input)	-20.18	99th percentile (-20.44)	100	99.53		Pgc
YRIIATTEG	P10861	163	171	C-terminus	CTSD (P07339; CATD_HUMAN). Ctsd (P18242; CATD_MOUSE). Ctsd (P24268; CATD_RAT)	TTEGLTGL	MEROPS:A01.009	Endopeptidase (input)	-21.65	MEROPS score threshold (-22.64)	79	84.74		CTSD
LSAGGAAAGVAGVAAA	P09851	87	102	N-terminus	CTSD (P07339; CATD_HUMAN). Ctsd (P18242; CATD_MOUSE). Ctsd (P24268; CATD_RAT)	GGVGLSAG	MEROPS:A01.009	Endopeptidase (input)	-21.07	MEROPS score threshold (-22.64)	79	84.74		CTSD
LSAGGAAAGVAGVAAA	P09851	87	102	C-terminus	CTSD (P07339; CATD_HUMAN). Ctsd (P18242; CATD_MOUSE). Ctsd (P24268; CATD_RAT)	VAAAAAGA	MEROPS:A01.009	Endopeptidase (input)	-20.48	MEROPS score threshold (-22.64)	79	84.74		CTSD
PAEVTALLAGLSGCGSG	P0CG25	411	427	N-terminus	CTSD (P07339; CATD_HUMAN). Ctsd (P18242; CATD_MOUSE). Ctsd (P24268; CATD_RAT)	AQRLPAEV	MEROPS:A01.009	Endopeptidase (input)	-22.64	MEROPS score threshold (-22.64)	79	84.74		CTSD
AIQKCDPAPFYL	O97594	1131	1142	N-terminus	CTSD (P07339; CATD_HUMAN). Ctsd (P18242; CATD_MOUSE). Ctsd (P24268; CATD_RAT)	ALIFAIQK	MEROPS:A01.009	Endopeptidase (input)	-19.82	MEROPS score threshold (-22.64)	79	84.74		CTSD
AIQKCDPAPFYL	O97594	1131	1142	C-terminus	CTSD (P07339; CATD_HUMAN). Ctsd (P18242; CATD_MOUSE). Ctsd (P24268; CATD_RAT)	PFYLFDEI	MEROPS:A01.009	Endopeptidase (input)	-21.27	MEROPS score threshold (-22.64)	79	84.74		CTSD
TRDMGGYSTTTDF	O77784	360	372	C-terminus	CTSD (P07339; CATD_HUMAN). Ctsd (P18242; CATD_MOUSE). Ctsd (P24268; CATD_RAT)	TTDFIKSV	MEROPS:A01.009	Endopeptidase (input)	-20.31	MEROPS score threshold (-22.64)	79	84.74		CTSD
GFGLSPIFPGGAGGLG	P04985-4	714	729	C-terminus	CTSD (P07339; CATD_HUMAN). Ctsd (P18242; CATD_MOUSE). Ctsd (P24268; CATD_RAT)	GGLGVGGK	MEROPS:A01.009	Endopeptidase (input)	-22.47	MEROPS score threshold (-22.64)	79	84.74		CTSD
KKNSPVLSLTADQM	P49884	303	316	C-terminus	CTSD (P07339; CATD_HUMAN). Ctsd (P18242; CATD_MOUSE). Ctsd (P24268; CATD_RAT)	ADQMISAL	MEROPS:A01.009	Endopeptidase (input)	-21.89	MEROPS score threshold (-22.64)	79	84.74		CTSD
SVVVGPSVVAV	P12763	290	300	N-terminus	CTSD (P07339; CATD_HUMAN). Ctsd (P18242; CATD_MOUSE). Ctsd (P24268; CATD_RAT)	PPVASVVV	MEROPS:A01.009	Endopeptidase (input)	-21.42	MEROPS score threshold (-22.64)	79	84.74		CTSD
DKSSLSSLDCL	P17667	197	207	C-terminus	CTSD (P07339; CATD_HUMAN). Ctsd (P18242; CATD_MOUSE). Ctsd (P24268; CATD_RAT)	LDCLSSIV	MEROPS:A01.009	Endopeptidase (input)	-20.55	MEROPS score threshold (-22.64)	79	84.74		CTSD
LVLLLVQVQPSLGKESA	P39873	14	30	C-terminus	CTSD (P07339; CATD_HUMAN). Ctsd (P18242; CATD_MOUSE). Ctsd (P24268; CATD_RAT)	KESAAAKF	MEROPS:A01.009	Endopeptidase (input)	-22.06	MEROPS score threshold (-22.64)	79	84.74		CTSD
LGLLSGPRSAH	P30404	12	22	N-terminus	CTSD (P07339; CATD_HUMAN). Ctsd (P18242; CATD_MOUSE). Ctsd (P24268; CATD_RAT)	GPRLLGLL	MEROPS:A01.009	Endopeptidase (input)	-20.17	MEROPS score threshold (-22.64)	79	84.74		CTSD
VAEEAPPPPPVVPS	P12661	707	720	N-terminus	CTSD (P07339; CATD_HUMAN). Ctsd (P18242; CATD_MOUSE). Ctsd (P24268; CATD_RAT)	PGEMVAEE	MEROPS:A01.009	Endopeptidase (input)	-20.21	MEROPS score threshold (-22.64)	79	84.74		CTSD
RANSVSKSFAVGTF	P48818	65	78	C-terminus	CTSD (P07339; CATD_HUMAN). Ctsd (P18242; CATD_MOUSE). Ctsd (P24268; CATD_RAT)	VGTFKGQL	MEROPS:A01.009	Endopeptidase (input)	-21.53	MEROPS score threshold (-22.64)	79	84.74		CTSD
DSCIMSIGFDHMEGLQY	P22027	94	110	C-terminus	CTSD (P07339; CATD_HUMAN). Ctsd (P18242; CATD_MOUSE). Ctsd (P24268; CATD_RAT)	GLQYVEKI	MEROPS:A01.009	Endopeptidase (input)	-22.32	MEROPS score threshold (-22.64)	79	84.74		CTSD
MAVRNNLAGAE	P49951	351	361	C-terminus	CTSD (P07339; CATD_HUMAN). Ctsd (P18242; CATD_MOUSE). Ctsd (P24268; CATD_RAT)	AGAEELFA	MEROPS:A01.009	Endopeptidase (input)	-21.98	MEROPS score threshold (-22.64)	79	84.74		CTSD
MKIYSQKTMANACTLVMC	P35246	23	40	N-terminus	CTSD (P07339; CATD_HUMAN). Ctsd (P18242; CATD_MOUSE). Ctsd (P24268; CATD_RAT)	LGAEMKIY	MEROPS:A01.009	Endopeptidase (input)	-22.39	MEROPS score threshold (-22.64)	79	84.74		CTSD
SVLPSGEGHLETSS	P13608	1249	1262	N-terminus	Pgc (P04073; PEPC_RAT). PGC (P20142; PEPC_HUMAN). Pgc (Q9D7R7; PEPC_MOUSE)	VEDLSVLP	MEROPS:A01.003	Endopeptidase (input)	-19.14	99th percentile (-20.44)	100	99.53		Pgc
SVLPSGEGHLETSS	P13608	1249	1262	N-terminus	CTSD (P07339; CATD_HUMAN). Ctsd (P18242; CATD_MOUSE). Ctsd (P24268; CATD_RAT)	VEDLSVLP	MEROPS:A01.009	Endopeptidase (input)	-17.88	MEROPS score threshold (-22.64)	79	84.74		CTSD
LDLQVISPQPRSIGLIAG	Q08DK1	228	245	N-terminus	CTSD (P07339; CATD_HUMAN). Ctsd (P18242; CATD_MOUSE). Ctsd (P24268; CATD_RAT)	STCLLDLQ	MEROPS:A01.009	Endopeptidase (input)	-20.44	MEROPS score threshold (-22.64)	79	84.74		CTSD
LDLQVISPQPRSIGLIAG	Q08DK1	228	245	C-terminus	CTSD (P07339; CATD_HUMAN). Ctsd (P18242; CATD_MOUSE). Ctsd (P24268; CATD_RAT)	LIAGAIGT	MEROPS:A01.009	Endopeptidase (input)	-21.15	MEROPS score threshold (-22.64)	79	84.74		CTSD
LKDTCGANAKQSRDCF	P61283	63	78	N-terminus	CTSD (P07339; CATD_HUMAN). Ctsd (P18242; CATD_MOUSE). Ctsd (P24268; CATD_RAT)	FREWLKDT	MEROPS:A01.009	Endopeptidase (input)	-22.01	MEROPS score threshold (-22.64)	79	84.74		CTSD
VKGGYTLDANKGGGHQT	Q01107	784	800	N-terminus	CTSD (P07339; CATD_HUMAN). Ctsd (P18242; CATD_MOUSE). Ctsd (P24268; CATD_RAT)	SFEMVKGG	MEROPS:A01.009	Endopeptidase (input)	-21.95	MEROPS score threshold (-22.64)	79	84.74		CTSD
KRGDGLKMENDPQEA	Q08DA0	109	123	C-terminus	CTSD (P07339; CATD_HUMAN). Ctsd (P18242; CATD_MOUSE). Ctsd (P24268; CATD_RAT)	PQEAESEM	MEROPS:A01.009	Endopeptidase (input)	-21.89	MEROPS score threshold (-22.64)	79	84.74		CTSD
LSDPQERAWYDNHREAL	Q0II91	56	72	C-terminus	CTSD (P07339; CATD_HUMAN). Ctsd (P18242; CATD_MOUSE). Ctsd (P24268; CATD_RAT)	REALLKGG	MEROPS:A01.009	Endopeptidase (input)	-18.19	MEROPS score threshold (-22.64)	79	84.74		CTSD
LLAGLGHEER	P79114	266	275	N-terminus	CTSD (P07339; CATD_HUMAN). Ctsd (P18242; CATD_MOUSE). Ctsd (P24268; CATD_RAT)	IFYALLAG	MEROPS:A01.009	Endopeptidase (input)	-22.24	MEROPS score threshold (-22.64)	79	84.74		CTSD
FGLRSLLANEEGWPILLGL	P58353	180	198	C-terminus	CTSD (P07339; CATD_HUMAN). Ctsd (P18242; CATD_MOUSE). Ctsd (P24268; CATD_RAT)	LLGLTGIP	MEROPS:A01.009	Endopeptidase (input)	-20.11	MEROPS score threshold (-22.64)	79	84.74		CTSD
LSAQKDTLLARHG	Q08DF2	494	506	N-terminus	CTSD (P07339; CATD_HUMAN). Ctsd (P18242; CATD_MOUSE). Ctsd (P24268; CATD_RAT)	MRNLLSAQ	MEROPS:A01.009	Endopeptidase (input)	-20.93	MEROPS score threshold (-22.64)	79	84.74		CTSD
PGVCGAGTPCRGLCS	P82649	41	55	C-terminus	CTSD (P07339; CATD_HUMAN). Ctsd (P18242; CATD_MOUSE). Ctsd (P24268; CATD_RAT)	GLCSEAES	MEROPS:A01.009	Endopeptidase (input)	-22.63	MEROPS score threshold (-22.64)	79	84.74		CTSD
PEAEAIVTAASETK	P81282	2939	2952	C-terminus	CTSD (P07339; CATD_HUMAN). Ctsd (P18242; CATD_MOUSE). Ctsd (P24268; CATD_RAT)	SETKLEGA	MEROPS:A01.009	Endopeptidase (input)	-22.49	MEROPS score threshold (-22.64)	79	84.74		CTSD
VEVEFGGGAELL	Q148F0	7	18	N-terminus	CTSD (P07339; CATD_HUMAN). Ctsd (P18242; CATD_MOUSE). Ctsd (P24268; CATD_RAT)	APLSVEVE	MEROPS:A01.009	Endopeptidase (input)	-22.51	MEROPS score threshold (-22.64)	79	84.74		CTSD
VEVEFGGGAELL	Q148F0	7	18	C-terminus	CTSD (P07339; CATD_HUMAN). Ctsd (P18242; CATD_MOUSE). Ctsd (P24268; CATD_RAT)	AELLFDGV	MEROPS:A01.009	Endopeptidase (input)	-19.07	MEROPS score threshold (-22.64)	79	84.74		CTSD
SRDAYEIRLLMEQESSAC	Q148K5	136	153	N-terminus	CTSD (P07339; CATD_HUMAN). Ctsd (P18242; CATD_MOUSE). Ctsd (P24268; CATD_RAT)	IMNLSRDA	MEROPS:A01.009	Endopeptidase (input)	-22.18	MEROPS score threshold (-22.64)	79	84.74		CTSD
ASAVVAVGAGGAPAGPA	Q0P5L0	230	246	N-terminus	CTSD (P07339; CATD_HUMAN). Ctsd (P18242; CATD_MOUSE). Ctsd (P24268; CATD_RAT)	GLEEASAV	MEROPS:A01.009	Endopeptidase (input)	-20.91	MEROPS score threshold (-22.64)	79	84.74		CTSD
WVLALVFGLSLVYF	Q17QN8	17	30	C-terminus	Pgc (P04073; PEPC_RAT). PGC (P20142; PEPC_HUMAN). Pgc (Q9D7R7; PEPC_MOUSE)	LVYFLTST	MEROPS:A01.003	Endopeptidase (input)	-19.99	99th percentile (-20.44)	100	99.53		Pgc
WVLALVFGLSLVYF	Q17QN8	17	30	C-terminus	CTSD (P07339; CATD_HUMAN). Ctsd (P18242; CATD_MOUSE). Ctsd (P24268; CATD_RAT)	LVYFLTST	MEROPS:A01.009	Endopeptidase (input)	-19.56	MEROPS score threshold (-22.64)	79	84.74		CTSD
METLSYSYC	Q0VCY6	150	158	N-terminus	CTSD (P07339; CATD_HUMAN). Ctsd (P18242; CATD_MOUSE). Ctsd (P24268; CATD_RAT)	VPSLMETL	MEROPS:A01.009	Endopeptidase (input)	-20.3	MEROPS score threshold (-22.64)	79	84.74		CTSD
EWLKMSYPAKVT	Q0VC58	175	186	C-terminus	CTSD (P07339; CATD_HUMAN). Ctsd (P18242; CATD_MOUSE). Ctsd (P24268; CATD_RAT)	AKVTLLGS	MEROPS:A01.009	Endopeptidase (input)	-21.84	MEROPS score threshold (-22.64)	79	84.74		CTSD
DWFTAETLGVSGTL	Q148G5	299	312	C-terminus	CTSD (P07339; CATD_HUMAN). Ctsd (P18242; CATD_MOUSE). Ctsd (P24268; CATD_RAT)	SGTLDLLD	MEROPS:A01.009	Endopeptidase (input)	-20.11	MEROPS score threshold (-22.64)	79	84.74		CTSD
REAEQLRFLFRKLASG	Q0V8C2	632	647	C-terminus	CTSD (P07339; CATD_HUMAN). Ctsd (P18242; CATD_MOUSE). Ctsd (P24268; CATD_RAT)	LASGFGEE	MEROPS:A01.009	Endopeptidase (input)	-21.22	MEROPS score threshold (-22.64)	79	84.74		CTSD
VERGAPALLT	Q148M6	192	201	N-terminus	CTSD (P07339; CATD_HUMAN). Ctsd (P18242; CATD_MOUSE). Ctsd (P24268; CATD_RAT)	EVLAVERG	MEROPS:A01.009	Endopeptidase (input)	-22.5	MEROPS score threshold (-22.64)	79	84.74		CTSD
LTGPLNLNDPEAKCR	Q0VD30	281	295	N-terminus	Pgc (P04073; PEPC_RAT). PGC (P20142; PEPC_HUMAN). Pgc (Q9D7R7; PEPC_MOUSE)	YGRFLTGP	MEROPS:A01.003	Endopeptidase (input)	-20.11	99th percentile (-20.44)	100	99.53		Pgc
LTGPLNLNDPEAKCR	Q0VD30	281	295	N-terminus	CTSD (P07339; CATD_HUMAN). Ctsd (P18242; CATD_MOUSE). Ctsd (P24268; CATD_RAT)	YGRFLTGP	MEROPS:A01.009	Endopeptidase (input)	-21.29	MEROPS score threshold (-22.64)	79	84.74		CTSD
ALALPGEPPVPAAPAGE	Q1LZD9	35	51	N-terminus	CTSD (P07339; CATD_HUMAN). Ctsd (P18242; CATD_MOUSE). Ctsd (P24268; CATD_RAT)	PAALALAL	MEROPS:A01.009	Endopeptidase (input)	-19.12	MEROPS score threshold (-22.64)	79	84.74		CTSD
AAAAAAAGAAGGRGS	Q28165	5	19	N-terminus	CTSD (P07339; CATD_HUMAN). Ctsd (P18242; CATD_MOUSE). Ctsd (P24268; CATD_RAT)	MAAAAAAA	MEROPS:A01.009	Endopeptidase (input)	-21.59	MEROPS score threshold (-22.64)	79	84.74		CTSD
CHWSSSSGSSSSEEMF	Q27967	128	143	C-terminus	CTSD (P07339; CATD_HUMAN). Ctsd (P18242; CATD_MOUSE). Ctsd (P24268; CATD_RAT)	EEMFFGDI	MEROPS:A01.009	Endopeptidase (input)	-20.9	MEROPS score threshold (-22.64)	79	84.74		CTSD
YVLDGRLGTEKESPTVE	Q29RZ4	128	144	C-terminus	CTSD (P07339; CATD_HUMAN). Ctsd (P18242; CATD_MOUSE). Ctsd (P24268; CATD_RAT)	PTVEACKK	MEROPS:A01.009	Endopeptidase (input)	-21.81	MEROPS score threshold (-22.64)	79	84.74		CTSD
NSNVENLPPHIIRL	Q1RML1	2	15	C-terminus	CTSD (P07339; CATD_HUMAN). Ctsd (P18242; CATD_MOUSE). Ctsd (P24268; CATD_RAT)	IIRLVYKE	MEROPS:A01.009	Endopeptidase (input)	-21.04	MEROPS score threshold (-22.64)	79	84.74		CTSD
SKSKSASFKESYMAAFYE	Q28013	526	543	N-terminus	Pgc (P04073; PEPC_RAT). PGC (P20142; PEPC_HUMAN). Pgc (Q9D7R7; PEPC_MOUSE)	LGSLSKSK	MEROPS:A01.003	Endopeptidase (input)	-20.41	99th percentile (-20.44)	100	99.53		Pgc
SKSKSASFKESYMAAFYE	Q28013	526	543	N-terminus	CTSD (P07339; CATD_HUMAN). Ctsd (P18242; CATD_MOUSE). Ctsd (P24268; CATD_RAT)	LGSLSKSK	MEROPS:A01.009	Endopeptidase (input)	-19.29	MEROPS score threshold (-22.64)	79	84.74		CTSD
QGEGDIIPKISELSL	Q29RT6	391	405	N-terminus	CTSD (P07339; CATD_HUMAN). Ctsd (P18242; CATD_MOUSE). Ctsd (P24268; CATD_RAT)	ILHLQGEG	MEROPS:A01.009	Endopeptidase (input)	-22.38	MEROPS score threshold (-22.64)	79	84.74		CTSD
QGEGDIIPKISELSL	Q29RT6	391	405	C-terminus	CTSD (P07339; CATD_HUMAN). Ctsd (P18242; CATD_MOUSE). Ctsd (P24268; CATD_RAT)	ELSLCDLA	MEROPS:A01.009	Endopeptidase (input)	-20.14	MEROPS score threshold (-22.64)	79	84.74		CTSD
LGAGPASISCASFLAR	Q28007	193	208	N-terminus	CTSD (P07339; CATD_HUMAN). Ctsd (P18242; CATD_MOUSE). Ctsd (P24268; CATD_RAT)	KIALLGAG	MEROPS:A01.009	Endopeptidase (input)	-18.56	MEROPS score threshold (-22.64)	79	84.74		CTSD
PCGAGKSLVGVTAA	Q1RMT1	341	354	N-terminus	CTSD (P07339; CATD_HUMAN). Ctsd (P18242; CATD_MOUSE). Ctsd (P24268; CATD_RAT)	VIVLPCGA	MEROPS:A01.009	Endopeptidase (input)	-22.38	MEROPS score threshold (-22.64)	79	84.74		CTSD
AVATSKPGLRP	Q1LZG6	31	41	N-terminus	CTSD (P07339; CATD_HUMAN). Ctsd (P18242; CATD_MOUSE). Ctsd (P24268; CATD_RAT)	VPVAAVAT	MEROPS:A01.009	Endopeptidase (input)	-20.18	MEROPS score threshold (-22.64)	79	84.74		CTSD
SNPDSTYED	Q24K09	516	524	C-terminus	CTSD (P07339; CATD_HUMAN). Ctsd (P18242; CATD_MOUSE). Ctsd (P24268; CATD_RAT)	TYEDLINK	MEROPS:A01.009	Endopeptidase (input)	-22.59	MEROPS score threshold (-22.64)	79	84.74		CTSD
TSSGSPPGLAAVPVE	Q2KIS6	72	86	C-terminus	CTSD (P07339; CATD_HUMAN). Ctsd (P18242; CATD_MOUSE). Ctsd (P24268; CATD_RAT)	VPVESAME	MEROPS:A01.009	Endopeptidase (input)	-21.91	MEROPS score threshold (-22.64)	79	84.74		CTSD
ETNSRLDSVLL	Q2KID0	99	109	C-terminus	CTSD (P07339; CATD_HUMAN). Ctsd (P18242; CATD_MOUSE). Ctsd (P24268; CATD_RAT)	SVLLLSSM	MEROPS:A01.009	Endopeptidase (input)	-19.93	MEROPS score threshold (-22.64)	79	84.74		CTSD
DCRLFEDTLVN	Q2HJ93	278	288	C-terminus	CTSD (P07339; CATD_HUMAN). Ctsd (P18242; CATD_MOUSE). Ctsd (P24268; CATD_RAT)	TLVNFQAA	MEROPS:A01.009	Endopeptidase (input)	-22.14	MEROPS score threshold (-22.64)	79	84.74		CTSD
QLELRAGAEQLDAL	Q2KI74	115	128	C-terminus	CTSD (P07339; CATD_HUMAN). Ctsd (P18242; CATD_MOUSE). Ctsd (P24268; CATD_RAT)	LDALLTNE	MEROPS:A01.009	Endopeptidase (input)	-17.9	MEROPS score threshold (-22.64)	79	84.74		CTSD
STHGSLSGLGLMGIKDE	Q2T9U5	745	761	C-terminus	CTSD (P07339; CATD_HUMAN). Ctsd (P18242; CATD_MOUSE). Ctsd (P24268; CATD_RAT)	IKDEEEST	MEROPS:A01.009	Endopeptidase (input)	-22.48	MEROPS score threshold (-22.64)	79	84.74		CTSD
ASTFLSPAFPGSQT	Q2LGB3	139	152	N-terminus	CTSD (P07339; CATD_HUMAN). Ctsd (P18242; CATD_MOUSE). Ctsd (P24268; CATD_RAT)	LPSLASTF	MEROPS:A01.009	Endopeptidase (input)	-20.55	MEROPS score threshold (-22.64)	79	84.74		CTSD
YITEAELVAGNGYR	Q2KHY5	61	74	N-terminus	CTSD (P07339; CATD_HUMAN). Ctsd (P18242; CATD_MOUSE). Ctsd (P24268; CATD_RAT)	SCILYITE	MEROPS:A01.009	Endopeptidase (input)	-22.44	MEROPS score threshold (-22.64)	79	84.74		CTSD
LAEFGEYIRKVFPT	Q2T9M7	76	89	N-terminus	CTSD (P07339; CATD_HUMAN). Ctsd (P18242; CATD_MOUSE). Ctsd (P24268; CATD_RAT)	NTTALAEF	MEROPS:A01.009	Endopeptidase (input)	-21.81	MEROPS score threshold (-22.64)	79	84.74		CTSD
STFSHFSLFHMAAN	Q2KHV4	210	223	N-terminus	CTSD (P07339; CATD_HUMAN). Ctsd (P18242; CATD_MOUSE). Ctsd (P24268; CATD_RAT)	PMLLSTFS	MEROPS:A01.009	Endopeptidase (input)	-21.93	MEROPS score threshold (-22.64)	79	84.74		CTSD
AVGGSGSGSTSGCGSAS	Q2T9W9	31	47	N-terminus	CTSD (P07339; CATD_HUMAN). Ctsd (P18242; CATD_MOUSE). Ctsd (P24268; CATD_RAT)	DLVPAVGG	MEROPS:A01.009	Endopeptidase (input)	-22.35	MEROPS score threshold (-22.64)	79	84.74		CTSD
HGESLGDRHLRTLQISY	Q2KJD6	179	195	C-terminus	CTSD (P07339; CATD_HUMAN). Ctsd (P18242; CATD_MOUSE). Ctsd (P24268; CATD_RAT)	QISYEALK	MEROPS:A01.009	Endopeptidase (input)	-21.2	MEROPS score threshold (-22.64)	79	84.74		CTSD
SDIPSQLEDADLLLAE	Q2KI13	335	350	N-terminus	CTSD (P07339; CATD_HUMAN). Ctsd (P18242; CATD_MOUSE). Ctsd (P24268; CATD_RAT)	FNTLSDIP	MEROPS:A01.009	Endopeptidase (input)	-21.24	MEROPS score threshold (-22.64)	79	84.74		CTSD
LTQYTKFAQM	Q2T9U1	421	430	N-terminus	Pgc (P04073; PEPC_RAT). PGC (P20142; PEPC_HUMAN). Pgc (Q9D7R7; PEPC_MOUSE)	VQELLTQY	MEROPS:A01.003	Endopeptidase (input)	-19.81	99th percentile (-20.44)	100	99.53		Pgc
LTQYTKFAQM	Q2T9U1	421	430	N-terminus	CTSD (P07339; CATD_HUMAN). Ctsd (P18242; CATD_MOUSE). Ctsd (P24268; CATD_RAT)	VQELLTQY	MEROPS:A01.009	Endopeptidase (input)	-19.99	MEROPS score threshold (-22.64)	79	84.74		CTSD
AEFTAKIALLEEAKKKKEE	Q32LP2	422	440	N-terminus	CTSD (P07339; CATD_HUMAN). Ctsd (P18242; CATD_MOUSE). Ctsd (P24268; CATD_RAT)	AAELAEFT	MEROPS:A01.009	Endopeptidase (input)	-20.19	MEROPS score threshold (-22.64)	79	84.74		CTSD
AEFTAKIALLEEAKKKKEE	Q32LP2	422	440	C-terminus	CTSD (P07339; CATD_HUMAN). Ctsd (P18242; CATD_MOUSE). Ctsd (P24268; CATD_RAT)	KKEEEATE	MEROPS:A01.009	Endopeptidase (input)	-21.74	MEROPS score threshold (-22.64)	79	84.74		CTSD
EYLGVAYAEKD	Q32LQ0	425	435	N-terminus	CTSD (P07339; CATD_HUMAN). Ctsd (P18242; CATD_MOUSE). Ctsd (P24268; CATD_RAT)	ASFFEYLG	MEROPS:A01.009	Endopeptidase (input)	-22.21	MEROPS score threshold (-22.64)	79	84.74		CTSD
AKQGLKKPVRGKQA	Q2YDJ8	153	166	N-terminus	CTSD (P07339; CATD_HUMAN). Ctsd (P18242; CATD_MOUSE). Ctsd (P24268; CATD_RAT)	NAAAAKQG	MEROPS:A01.009	Endopeptidase (input)	-22.47	MEROPS score threshold (-22.64)	79	84.74		CTSD
LPSLLLGTLLTFTSG	Q2TBI0	1	22	C-terminus	CTSD (P07339; CATD_HUMAN). Ctsd (P18242; CATD_MOUSE). Ctsd (P24268; CATD_RAT)	FTSGALGA	MEROPS:A01.009	Endopeptidase (input)	-21.57	MEROPS score threshold (-22.64)	79	84.74		CTSD
FTAIAGSEIFSLEM	Q2TBU9	100	113	C-terminus	CTSD (P07339; CATD_HUMAN). Ctsd (P18242; CATD_MOUSE). Ctsd (P24268; CATD_RAT)	SLEMSKTE	MEROPS:A01.009	Endopeptidase (input)	-21.85	MEROPS score threshold (-22.64)	79	84.74		CTSD
PSIGFMNKIFHPNID	Q32LN1	66	80	C-terminus	CTSD (P07339; CATD_HUMAN). Ctsd (P18242; CATD_MOUSE). Ctsd (P24268; CATD_RAT)	PNIDEASG	MEROPS:A01.009	Endopeptidase (input)	-21.74	MEROPS score threshold (-22.64)	79	84.74		CTSD
VKSQDKQFAAATIQT	Q32PG1	413	427	N-terminus	CTSD (P07339; CATD_HUMAN). Ctsd (P18242; CATD_MOUSE). Ctsd (P24268; CATD_RAT)	FQTYVKSQ	MEROPS:A01.009	Endopeptidase (input)	-21.87	MEROPS score threshold (-22.64)	79	84.74		CTSD
GNQRELARQKNMKKSQE	Q32P76	4	20	C-terminus	CTSD (P07339; CATD_HUMAN). Ctsd (P18242; CATD_MOUSE). Ctsd (P24268; CATD_RAT)	KSQEISKG	MEROPS:A01.009	Endopeptidase (input)	-22.3	MEROPS score threshold (-22.64)	79	84.74		CTSD
GEAANPKPLGVSEEKDQEP	Q32LK9	302	320	N-terminus	CTSD (P07339; CATD_HUMAN). Ctsd (P18242; CATD_MOUSE). Ctsd (P24268; CATD_RAT)	EAGLGEAA	MEROPS:A01.009	Endopeptidase (input)	-22	MEROPS score threshold (-22.64)	79	84.74		CTSD
DSEDYNTCE	Q3SYU7	146	154	N-terminus	CTSD (P07339; CATD_HUMAN). Ctsd (P18242; CATD_MOUSE). Ctsd (P24268; CATD_RAT)	CSLLDSED	MEROPS:A01.009	Endopeptidase (input)	-21.49	MEROPS score threshold (-22.64)	79	84.74		CTSD
CTSPNPTVCFLKER	Q3MHN5	190	203	C-terminus	CTSD (P07339; CATD_HUMAN). Ctsd (P18242; CATD_MOUSE). Ctsd (P24268; CATD_RAT)	LKERLQLK	MEROPS:A01.009	Endopeptidase (input)	-22.59	MEROPS score threshold (-22.64)	79	84.74		CTSD
TSVPPAEGSCPSNAL	Q3SX17	4	18	C-terminus	CTSD (P07339; CATD_HUMAN). Ctsd (P18242; CATD_MOUSE). Ctsd (P24268; CATD_RAT)	SNALITKQ	MEROPS:A01.009	Endopeptidase (input)	-19.68	MEROPS score threshold (-22.64)	79	84.74		CTSD
MNKLQPGSVPKINRSMQNW	Q3SYU6	64	82	N-terminus	CTSD (P07339; CATD_HUMAN). Ctsd (P18242; CATD_MOUSE). Ctsd (P24268; CATD_RAT)	LCTLMNKL	MEROPS:A01.009	Endopeptidase (input)	-22.11	MEROPS score threshold (-22.64)	79	84.74		CTSD
PGSTCRDHEKEL	Q3SYW2	597	608	C-terminus	CTSD (P07339; CATD_HUMAN). Ctsd (P18242; CATD_MOUSE). Ctsd (P24268; CATD_RAT)	EKELLNQV	MEROPS:A01.009	Endopeptidase (input)	-20.91	MEROPS score threshold (-22.64)	79	84.74		CTSD
SAADAQAIADMAAYQLEL	Q3SZC2	68	85	N-terminus	CTSD (P07339; CATD_HUMAN). Ctsd (P18242; CATD_MOUSE). Ctsd (P24268; CATD_RAT)	ALSGSAAD	MEROPS:A01.009	Endopeptidase (input)	-21.83	MEROPS score threshold (-22.64)	79	84.74		CTSD
ESVPTAIYCF	Q3SYV9	276	285	N-terminus	CTSD (P07339; CATD_HUMAN). Ctsd (P18242; CATD_MOUSE). Ctsd (P24268; CATD_RAT)	IAAFESVP	MEROPS:A01.009	Endopeptidase (input)	-20.69	MEROPS score threshold (-22.64)	79	84.74		CTSD
LASGEGAAAGLPALD	Q3SX44	23	37	N-terminus	CTSD (P07339; CATD_HUMAN). Ctsd (P18242; CATD_MOUSE). Ctsd (P24268; CATD_RAT)	VPESLASG	MEROPS:A01.009	Endopeptidase (input)	-21.68	MEROPS score threshold (-22.64)	79	84.74		CTSD
LASGEGAAAGLPALD	Q3SX44	23	37	C-terminus	CTSD (P07339; CATD_HUMAN). Ctsd (P18242; CATD_MOUSE). Ctsd (P24268; CATD_RAT)	PALDLAKA	MEROPS:A01.009	Endopeptidase (input)	-21.09	MEROPS score threshold (-22.64)	79	84.74		CTSD
LIPMIGFIGLGMGSAALYL	Q3SZ44	20	38	C-terminus	CTSD (P07339; CATD_HUMAN). Ctsd (P18242; CATD_MOUSE). Ctsd (P24268; CATD_RAT)	ALYLLRLA	MEROPS:A01.009	Endopeptidase (input)	-19.43	MEROPS score threshold (-22.64)	79	84.74		CTSD
DAQHESGQSSS	Q3T013	77	87	N-terminus	CTSD (P07339; CATD_HUMAN). Ctsd (P18242; CATD_MOUSE). Ctsd (P24268; CATD_RAT)	KILLDAQH	MEROPS:A01.009	Endopeptidase (input)	-22.6	MEROPS score threshold (-22.64)	79	84.74		CTSD
LLLQDFSRNLSAKSSAL	Q3SZ87	15	31	N-terminus	CTSD (P07339; CATD_HUMAN). Ctsd (P18242; CATD_MOUSE). Ctsd (P24268; CATD_RAT)	SEEDLLLQ	MEROPS:A01.009	Endopeptidase (input)	-20.34	MEROPS score threshold (-22.64)	79	84.74		CTSD
LLLQDFSRNLSAKSSAL	Q3SZ87	15	31	C-terminus	CTSD (P07339; CATD_HUMAN). Ctsd (P18242; CATD_MOUSE). Ctsd (P24268; CATD_RAT)	SSALFFGN	MEROPS:A01.009	Endopeptidase (input)	-21.28	MEROPS score threshold (-22.64)	79	84.74		CTSD
TPPFSSSCGVLGTG	Q3MHZ4	71	84	C-terminus	CTSD (P07339; CATD_HUMAN). Ctsd (P18242; CATD_MOUSE). Ctsd (P24268; CATD_RAT)	LGTGLCEL	MEROPS:A01.009	Endopeptidase (input)	-22.22	MEROPS score threshold (-22.64)	79	84.74		CTSD
AKLITVNTPDLV	Q3MHE8	537	548	N-terminus	CTSD (P07339; CATD_HUMAN). Ctsd (P18242; CATD_MOUSE). Ctsd (P24268; CATD_RAT)	MTALAKLI	MEROPS:A01.009	Endopeptidase (input)	-19.78	MEROPS score threshold (-22.64)	79	84.74		CTSD
LSAGENVLPSTMQPGDD	Q58DA4	141	157	N-terminus	CTSD (P07339; CATD_HUMAN). Ctsd (P18242; CATD_MOUSE). Ctsd (P24268; CATD_RAT)	FFVSLSAG	MEROPS:A01.009	Endopeptidase (input)	-21.75	MEROPS score threshold (-22.64)	79	84.74		CTSD
LSAGENVLPSTMQPGDD	Q58DA4	141	157	C-terminus	CTSD (P07339; CATD_HUMAN). Ctsd (P18242; CATD_MOUSE). Ctsd (P24268; CATD_RAT)	PGDDVVSN	MEROPS:A01.009	Endopeptidase (input)	-21.79	MEROPS score threshold (-22.64)	79	84.74		CTSD
AVGMPANAVTLWMLFRT	Q58D85	106	122	N-terminus	CTSD (P07339; CATD_HUMAN). Ctsd (P18242; CATD_MOUSE). Ctsd (P24268; CATD_RAT)	ILVFAVGM	MEROPS:A01.009	Endopeptidase (input)	-19.04	MEROPS score threshold (-22.64)	79	84.74		CTSD
GLKGGGVCFNSQPSS	Q3ZBG8	119	133	N-terminus	CTSD (P07339; CATD_HUMAN). Ctsd (P18242; CATD_MOUSE). Ctsd (P24268; CATD_RAT)	SKELGLKG	MEROPS:A01.009	Endopeptidase (input)	-21.47	MEROPS score threshold (-22.64)	79	84.74		CTSD
EALSVAKMQVEMGA	Q4JIJ3	397	410	N-terminus	CTSD (P07339; CATD_HUMAN). Ctsd (P18242; CATD_MOUSE). Ctsd (P24268; CATD_RAT)	GNYEEALS	MEROPS:A01.009	Endopeptidase (input)	-22.31	MEROPS score threshold (-22.64)	79	84.74		CTSD
AFNIVYVAL	Q58DA8	200	208	C-terminus	CTSD (P07339; CATD_HUMAN). Ctsd (P18242; CATD_MOUSE). Ctsd (P24268; CATD_RAT)	YVALKSLK	MEROPS:A01.009	Endopeptidase (input)	-19.24	MEROPS score threshold (-22.64)	79	84.74		CTSD
LNIAASAAVQAA	Q3ZCI8	126	137	C-terminus	CTSD (P07339; CATD_HUMAN). Ctsd (P18242; CATD_MOUSE). Ctsd (P24268; CATD_RAT)	VQAATKSQ	MEROPS:A01.009	Endopeptidase (input)	-22.33	MEROPS score threshold (-22.64)	79	84.74		CTSD
ASEGGAEDGASGVGGSA	Q59HJ6	86	102	N-terminus	CTSD (P07339; CATD_HUMAN). Ctsd (P18242; CATD_MOUSE). Ctsd (P24268; CATD_RAT)	GGEDASEG	MEROPS:A01.009	Endopeptidase (input)	-21.04	MEROPS score threshold (-22.64)	79	84.74		CTSD
ASSLLQKSKLGFL	Q58DC2	124	136	C-terminus	CTSD (P07339; CATD_HUMAN). Ctsd (P18242; CATD_MOUSE). Ctsd (P24268; CATD_RAT)	LGFLNATS	MEROPS:A01.009	Endopeptidase (input)	-20.48	MEROPS score threshold (-22.64)	79	84.74		CTSD
RHRSGMVTAA	Q3ZBI5	20	29	C-terminus	CTSD (P07339; CATD_HUMAN). Ctsd (P18242; CATD_MOUSE). Ctsd (P24268; CATD_RAT)	VTAASQGG	MEROPS:A01.009	Endopeptidase (input)	-21.34	MEROPS score threshold (-22.64)	79	84.74		CTSD
EPLGAMAASEDEEE	Q58CS7	192	205	C-terminus	CTSD (P07339; CATD_HUMAN). Ctsd (P18242; CATD_MOUSE). Ctsd (P24268; CATD_RAT)	DEEEEEEA	MEROPS:A01.009	Endopeptidase (input)	-19.8	MEROPS score threshold (-22.64)	79	84.74		CTSD
AAVWADPGKYALMGAA	Q4PKH3	542	557	C-terminus	CTSD (P07339; CATD_HUMAN). Ctsd (P18242; CATD_MOUSE). Ctsd (P24268; CATD_RAT)	MGAAAQLG	MEROPS:A01.009	Endopeptidase (input)	-21.7	MEROPS score threshold (-22.64)	79	84.74		CTSD
AFVGLKRAFRKAPLLY	Q52QI2	838	853	N-terminus	CTSD (P07339; CATD_HUMAN). Ctsd (P18242; CATD_MOUSE). Ctsd (P24268; CATD_RAT)	EEQEAFVG	MEROPS:A01.009	Endopeptidase (input)	-22.47	MEROPS score threshold (-22.64)	79	84.74		CTSD
LVLLSLDYLTSLF	Q58DD2	383	395	N-terminus	CTSD (P07339; CATD_HUMAN). Ctsd (P18242; CATD_MOUSE). Ctsd (P24268; CATD_RAT)	MTGALVLL	MEROPS:A01.009	Endopeptidase (input)	-21.63	MEROPS score threshold (-22.64)	79	84.74		CTSD
PSARSTQGATGRRDDPDVF	Q3ZBB1	106	124	C-terminus	Pgc (P04073; PEPC_RAT). PGC (P20142; PEPC_HUMAN). Pgc (Q9D7R7; PEPC_MOUSE)	PDVFLKTP	MEROPS:A01.003	Endopeptidase (input)	-19.63	99th percentile (-20.44)	100	99.53		Pgc
PSARSTQGATGRRDDPDVF	Q3ZBB1	106	124	C-terminus	CTSD (P07339; CATD_HUMAN). Ctsd (P18242; CATD_MOUSE). Ctsd (P24268; CATD_RAT)	PDVFLKTP	MEROPS:A01.009	Endopeptidase (input)	-19.33	MEROPS score threshold (-22.64)	79	84.74		CTSD
GWEYAFEGTAGRF	Q3T110	126	138	C-terminus	Pgc (P04073; PEPC_RAT). PGC (P20142; PEPC_HUMAN). Pgc (Q9D7R7; PEPC_MOUSE)	AGRFLTDS	MEROPS:A01.003	Endopeptidase (input)	-19.2	99th percentile (-20.44)	100	99.53		Pgc
GWEYAFEGTAGRF	Q3T110	126	138	C-terminus	CTSD (P07339; CATD_HUMAN). Ctsd (P18242; CATD_MOUSE). Ctsd (P24268; CATD_RAT)	AGRFLTDS	MEROPS:A01.009	Endopeptidase (input)	-20.53	MEROPS score threshold (-22.64)	79	84.74		CTSD
KYWSFSISPSHEY	Q58CX2	476	488	C-terminus	CTSD (P07339; CATD_HUMAN). Ctsd (P18242; CATD_MOUSE). Ctsd (P24268; CATD_RAT)	LDRLSLAQ	MEROPS:A01.009	Endopeptidase (input)	-19.46	MEROPS score threshold (-22.64)	79	84.74		CTSD
VKAVASVLGRSNP	Q5EA59	191	203	N-terminus	CTSD (P07339; CATD_HUMAN). Ctsd (P18242; CATD_MOUSE). Ctsd (P24268; CATD_RAT)	PPTWVKAV	MEROPS:A01.009	Endopeptidase (input)	-22.39	MEROPS score threshold (-22.64)	79	84.74		CTSD
VFAQADGSAYIEQGNTKA	Q7YRA3	31	48	C-terminus	CTSD (P07339; CATD_HUMAN). Ctsd (P18242; CATD_MOUSE). Ctsd (P24268; CATD_RAT)	NTKALAVV	MEROPS:A01.009	Endopeptidase (input)	-21.91	MEROPS score threshold (-22.64)	79	84.74		CTSD
AAAAAAAGPGSPGAAAVVK	Q6VFT7	229	247	N-terminus	CTSD (P07339; CATD_HUMAN). Ctsd (P18242; CATD_MOUSE). Ctsd (P24268; CATD_RAT)	AAAAAAAA	MEROPS:A01.009	Endopeptidase (input)	-20.43	MEROPS score threshold (-22.64)	79	84.74		CTSD
TVAAGGGSRLFFRS	Q75WB5	351	364	N-terminus	CTSD (P07339; CATD_HUMAN). Ctsd (P18242; CATD_MOUSE). Ctsd (P24268; CATD_RAT)	LDINTVAA	MEROPS:A01.009	Endopeptidase (input)	-22.29	MEROPS score threshold (-22.64)	79	84.74		CTSD
TPTGKESIVQVHIEVM	Q6URK6	454	469	C-terminus	CTSD (P07339; CATD_HUMAN). Ctsd (P18242; CATD_MOUSE). Ctsd (P24268; CATD_RAT)	IEVMDEND	MEROPS:A01.009	Endopeptidase (input)	-21.81	MEROPS score threshold (-22.64)	79	84.74		CTSD
SEDAYPYVGQDENCMY	Q5E968	197	212	N-terminus	CTSD (P07339; CATD_HUMAN). Ctsd (P18242; CATD_MOUSE). Ctsd (P24268; CATD_RAT)	RGIDSEDA	MEROPS:A01.009	Endopeptidase (input)	-22.56	MEROPS score threshold (-22.64)	79	84.74		CTSD
LHRDMKAANVLITRDGVL	Q5EAB2	146	163	C-terminus	CTSD (P07339; CATD_HUMAN). Ctsd (P18242; CATD_MOUSE). Ctsd (P24268; CATD_RAT)	DGVLKLAD	MEROPS:A01.009	Endopeptidase (input)	-19.57	MEROPS score threshold (-22.64)	79	84.74		CTSD
GALIGGVVGGPIGLLA	Q5E9Y2	236	251	N-terminus	CTSD (P07339; CATD_HUMAN). Ctsd (P18242; CATD_MOUSE). Ctsd (P24268; CATD_RAT)	LPVAGALI	MEROPS:A01.009	Endopeptidase (input)	-22.21	MEROPS score threshold (-22.64)	79	84.74		CTSD
SQGSVPEPLN	Q5E9J8	101	110	N-terminus	CTSD (P07339; CATD_HUMAN). Ctsd (P18242; CATD_MOUSE). Ctsd (P24268; CATD_RAT)	GISASQGS	MEROPS:A01.009	Endopeptidase (input)	-22.59	MEROPS score threshold (-22.64)	79	84.74		CTSD
LPQLEPAEEAARLHAE	Q5QQ49	789	804	C-terminus	CTSD (P07339; CATD_HUMAN). Ctsd (P18242; CATD_MOUSE). Ctsd (P24268; CATD_RAT)	LHAELTGP	MEROPS:A01.009	Endopeptidase (input)	-22.58	MEROPS score threshold (-22.64)	79	84.74		CTSD
LTKFFYAISSSKSSNV	Q5BIM9	363	378	N-terminus	CTSD (P07339; CATD_HUMAN). Ctsd (P18242; CATD_MOUSE). Ctsd (P24268; CATD_RAT)	LLITLTKF	MEROPS:A01.009	Endopeptidase (input)	-21.9	MEROPS score threshold (-22.64)	79	84.74		CTSD
DVNDLDTDSFLGGLKWC	Q865B7	40	56	N-terminus	CTSD (P07339; CATD_HUMAN). Ctsd (P18242; CATD_MOUSE). Ctsd (P24268; CATD_RAT)	LSELDVND	MEROPS:A01.009	Endopeptidase (input)	-18.83	MEROPS score threshold (-22.64)	79	84.74		CTSD
DLVEKLKLLRYEE	Q5EA95	46	58	N-terminus	CTSD (P07339; CATD_HUMAN). Ctsd (P18242; CATD_MOUSE). Ctsd (P24268; CATD_RAT)	VVMEDLVE	MEROPS:A01.009	Endopeptidase (input)	-21.8	MEROPS score threshold (-22.64)	79	84.74		CTSD
SSPYSAAKFALDSFFSSL	Q6Q7D1	175	192	N-terminus	Pgc (P04073; PEPC_RAT). PGC (P20142; PEPC_HUMAN). Pgc (Q9D7R7; PEPC_MOUSE)	PTSFSSPY	MEROPS:A01.003	Endopeptidase (input)	-19.94	99th percentile (-20.44)	100	99.53		Pgc
SAVWGPLGEC	Q5E966	151	160	C-terminus	CTSD (P07339; CATD_HUMAN). Ctsd (P18242; CATD_MOUSE). Ctsd (P24268; CATD_RAT)	LGECIIAG	MEROPS:A01.009	Endopeptidase (input)	-21.42	MEROPS score threshold (-22.64)	79	84.74		CTSD
EGDTPQHLSPVQLLHQLQA	Q8MJ05	1074	1092	N-terminus	CTSD (P07339; CATD_HUMAN). Ctsd (P18242; CATD_MOUSE). Ctsd (P24268; CATD_RAT)	QVDLEGDT	MEROPS:A01.009	Endopeptidase (input)	-20.12	MEROPS score threshold (-22.64)	79	84.74		CTSD
NGGLPQTTSEKS	Q8MJ05	562	573	C-terminus	CTSD (P07339; CATD_HUMAN). Ctsd (P18242; CATD_MOUSE). Ctsd (P24268; CATD_RAT)	SEKSIVEE	MEROPS:A01.009	Endopeptidase (input)	-21.65	MEROPS score threshold (-22.64)	79	84.74		CTSD
LKEISSTSQTLLYT	Q8MJ08	391	404	N-terminus	CTSD (P07339; CATD_HUMAN). Ctsd (P18242; CATD_MOUSE). Ctsd (P24268; CATD_RAT)	LSRELKEI	MEROPS:A01.009	Endopeptidase (input)	-21.17	MEROPS score threshold (-22.64)	79	84.74		CTSD
ASSTHGRNFVSFR	Q8SQG8	262	274	N-terminus	Pgc (P04073; PEPC_RAT). PGC (P20142; PEPC_HUMAN). Pgc (Q9D7R7; PEPC_MOUSE)	EETLASST	MEROPS:A01.003	Endopeptidase (input)	-20.44	99th percentile (-20.44)	100	99.53		Pgc
ASSTHGRNFVSFR	Q8SQG8	262	274	N-terminus	CTSD (P07339; CATD_HUMAN). Ctsd (P18242; CATD_MOUSE). Ctsd (P24268; CATD_RAT)	EETLASST	MEROPS:A01.009	Endopeptidase (input)	-18.75	MEROPS score threshold (-22.64)	79	84.74		CTSD
LQAPFTDCGDGPML	Q9TU34	523	536	N-terminus	CTSD (P07339; CATD_HUMAN). Ctsd (P18242; CATD_MOUSE). Ctsd (P24268; CATD_RAT)	IFKLLQAP	MEROPS:A01.009	Endopeptidase (input)	-20.81	MEROPS score threshold (-22.64)	79	84.74		CTSD
EQANEDPSDSTESEEV	Q95120	60	75	N-terminus	CTSD (P07339; CATD_HUMAN). Ctsd (P18242; CATD_MOUSE). Ctsd (P24268; CATD_RAT)	LSSEEQAN	MEROPS:A01.009	Endopeptidase (input)	-21.66	MEROPS score threshold (-22.64)	79	84.74		CTSD
YGASPDIDTGTGPTPT	Q9GLE5	446	461	N-terminus	CTSD (P07339; CATD_HUMAN). Ctsd (P18242; CATD_MOUSE). Ctsd (P24268; CATD_RAT)	IQELYGAS	MEROPS:A01.009	Endopeptidase (input)	-19.82	MEROPS score threshold (-22.64)	79	84.74		CTSD
LNVHMNPPQVKAT	Q95115	360	372	C-terminus	CTSD (P07339; CATD_HUMAN). Ctsd (P18242; CATD_MOUSE). Ctsd (P24268; CATD_RAT)	VKATIISE	MEROPS:A01.009	Endopeptidase (input)	-22.54	MEROPS score threshold (-22.64)	79	84.74		CTSD
PVPTEGLKPDDVPAL	Q95JH2	236	250	C-terminus	CTSD (P07339; CATD_HUMAN). Ctsd (P18242; CATD_MOUSE). Ctsd (P24268; CATD_RAT)	VPALADRV	MEROPS:A01.009	Endopeptidase (input)	-22.41	MEROPS score threshold (-22.64)	79	84.74		CTSD
EEFQPDLVVLSGLHMMEGQ	A2VE47	251	269	N-terminus	CTSE (P14091; CATE_HUMAN). Ctse (P16228; CATE_RAT). Ctse (P70269; CATE_MOUSE)	VSSLEEFQ	MEROPS:A01.010	Endopeptidase (input)	-21.22	MEROPS score threshold (-22.27)	71	87.48		CTSE
DALVVPVGGGGMLAGIAVT	A0JNI4	178	196	C-terminus	CTSE (P14091; CATE_HUMAN). Ctse (P16228; CATE_RAT). Ctse (P70269; CATE_MOUSE)	IAVTVKAL	MEROPS:A01.010	Endopeptidase (input)	-22.12	MEROPS score threshold (-22.27)	71	87.48		CTSE
MAGLGGEPIPDGEF	A2VE45	1	14	C-terminus	CTSE (P14091; CATE_HUMAN). Ctse (P16228; CATE_RAT). Ctse (P70269; CATE_MOUSE)	DGEFTAVV	MEROPS:A01.010	Endopeptidase (input)	-20.11	MEROPS score threshold (-22.27)	71	87.48		CTSE
SLSPGAASSSSGDGDGKEG	A4FV57	133	151	C-terminus	CTSE (P14091; CATE_HUMAN). Ctse (P16228; CATE_RAT). Ctse (P70269; CATE_MOUSE)	GKEGLEEP	MEROPS:A01.010	Endopeptidase (input)	-21.35	MEROPS score threshold (-22.27)	71	87.48		CTSE
GGLGERVLGFCQLNLPSAK	A2VDL6	543	561	N-terminus	CTSE (P14091; CATE_HUMAN). Ctse (P16228; CATE_RAT). Ctse (P70269; CATE_MOUSE)	YLELGGLG	MEROPS:A01.010	Endopeptidase (input)	-20.65	MEROPS score threshold (-22.27)	71	87.48		CTSE
VAPGPGLAPPAQPGAP	A2VE44	350	365	N-terminus	CTSE (P14091; CATE_HUMAN). Ctse (P16228; CATE_RAT). Ctse (P70269; CATE_MOUSE)	LVSTVAPG	MEROPS:A01.010	Endopeptidase (input)	-21.44	MEROPS score threshold (-22.27)	71	87.48		CTSE
LYSSKKKIFMGL	A2VE44	514	525	N-terminus	CTSE (P14091; CATE_HUMAN). Ctse (P16228; CATE_RAT). Ctse (P70269; CATE_MOUSE)	VLMLLYSS	MEROPS:A01.010	Endopeptidase (input)	-21.54	MEROPS score threshold (-22.27)	71	87.48		CTSE
VLLSGVIAFMVNLS	A4IFK2	227	240	N-terminus	CTSE (P14091; CATE_HUMAN). Ctse (P16228; CATE_RAT). Ctse (P70269; CATE_MOUSE)	ALLMVLLS	MEROPS:A01.010	Endopeptidase (input)	-19.47	MEROPS score threshold (-22.27)	71	87.48		CTSE
AILNVGAPAAG	A1A4J1	403	413	N-terminus	CTSE (P14091; CATE_HUMAN). Ctse (P16228; CATE_RAT). Ctse (P70269; CATE_MOUSE)	NFSLAILN	MEROPS:A01.010	Endopeptidase (input)	-19.63	MEROPS score threshold (-22.27)	71	87.48		CTSE
QRSLVLFSVGVVLAL	A0JNC3	85	99	C-terminus	CTSE (P14091; CATE_HUMAN). Ctse (P16228; CATE_RAT). Ctse (P70269; CATE_MOUSE)	VLALVLNL	MEROPS:A01.010	Endopeptidase (input)	-17.83	MEROPS score threshold (-22.27)	71	87.48		CTSE
YQAHSFVSAF	A5PJL1	100	109	C-terminus	CTSE (P14091; CATE_HUMAN). Ctse (P16228; CATE_RAT). Ctse (P70269; CATE_MOUSE)	VSAFIGGL	MEROPS:A01.010	Endopeptidase (input)	-19.89	MEROPS score threshold (-22.27)	71	87.48		CTSE
VSLTEHFLKFASVFQP	A7E369	99	114	N-terminus	CTSE (P14091; CATE_HUMAN). Ctse (P16228; CATE_RAT). Ctse (P70269; CATE_MOUSE)	IQISVSLT	MEROPS:A01.010	Endopeptidase (input)	-22.09	MEROPS score threshold (-22.27)	71	87.48		CTSE
AAAEAASSSMTKGKE	A6QP11	108	122	N-terminus	CTSE (P14091; CATE_HUMAN). Ctse (P16228; CATE_RAT). Ctse (P70269; CATE_MOUSE)	SESGAAAE	MEROPS:A01.010	Endopeptidase (input)	-20.92	MEROPS score threshold (-22.27)	71	87.48		CTSE
LPGKKVTTEDVE	A5D7R1	303	314	C-terminus	CTSE (P14091; CATE_HUMAN). Ctse (P16228; CATE_RAT). Ctse (P70269; CATE_MOUSE)	EDVEKTVK	MEROPS:A01.010	Endopeptidase (input)	-21.24	MEROPS score threshold (-22.27)	71	87.48		CTSE
AVFANCAGMLVVVF	A5D9A7	197	210	N-terminus	CTSE (P14091; CATE_HUMAN). Ctse (P16228; CATE_RAT). Ctse (P70269; CATE_MOUSE)	LPSEAVFA	MEROPS:A01.010	Endopeptidase (input)	-20.92	MEROPS score threshold (-22.27)	71	87.48		CTSE
AVFANCAGMLVVVF	A5D9A7	197	210	C-terminus	CTSE (P14091; CATE_HUMAN). Ctse (P16228; CATE_RAT). Ctse (P70269; CATE_MOUSE)	VVVFGLLV	MEROPS:A01.010	Endopeptidase (input)	-20.47	MEROPS score threshold (-22.27)	71	87.48		CTSE
EGRLWAESKGFLYF	A5D7F5	148	161	C-terminus	CTSE (P14091; CATE_HUMAN). Ctse (P16228; CATE_RAT). Ctse (P70269; CATE_MOUSE)	FLYFETSA	MEROPS:A01.010	Endopeptidase (input)	-21.52	MEROPS score threshold (-22.27)	71	87.48		CTSE
HSYYQGLFSTAVL	A5PK74	263	275	C-terminus	CTSE (P14091; CATE_HUMAN). Ctse (P16228; CATE_RAT). Ctse (P70269; CATE_MOUSE)	TAVLDSIL	MEROPS:A01.010	Endopeptidase (input)	-20.31	MEROPS score threshold (-22.27)	71	87.48		CTSE
LSAATTFEPLEPVKDTD	A5PJZ5	81	97	N-terminus	CTSE (P14091; CATE_HUMAN). Ctse (P16228; CATE_RAT). Ctse (P70269; CATE_MOUSE)	RLESLSAA	MEROPS:A01.010	Endopeptidase (input)	-20.68	MEROPS score threshold (-22.27)	71	87.48		CTSE
KTCKFVSGFMSELSPVRA	A5PJM5	332	349	C-terminus	CTSE (P14091; CATE_HUMAN). Ctse (P16228; CATE_RAT). Ctse (P70269; CATE_MOUSE)	PVRAELLG	MEROPS:A01.010	Endopeptidase (input)	-21.49	MEROPS score threshold (-22.27)	71	87.48		CTSE
HSVFALATHHCASVVS	A7E2Y6	1128	1143	C-terminus	CTSE (P14091; CATE_HUMAN). Ctse (P16228; CATE_RAT). Ctse (P70269; CATE_MOUSE)	SVVSNLLG	MEROPS:A01.010	Endopeptidase (input)	-21.79	MEROPS score threshold (-22.27)	71	87.48		CTSE
SDELADVGGALRGLNLS	A5PJQ2	218	234	N-terminus	CTSE (P14091; CATE_HUMAN). Ctse (P16228; CATE_RAT). Ctse (P70269; CATE_MOUSE)	VGALSDEL	MEROPS:A01.010	Endopeptidase (input)	-19.98	MEROPS score threshold (-22.27)	71	87.48		CTSE
RAESPSQGKPGEAGAE	E1BM58	709	724	C-terminus	CTSE (P14091; CATE_HUMAN). Ctse (P16228; CATE_RAT). Ctse (P70269; CATE_MOUSE)	AGAEVSGK	MEROPS:A01.010	Endopeptidase (input)	-19.77	MEROPS score threshold (-22.27)	71	87.48		CTSE
VTQSHWPSEPSEAV	O18738	26	39	N-terminus	CTSE (P14091; CATE_HUMAN). Ctse (P16228; CATE_RAT). Ctse (P70269; CATE_MOUSE)	LSVAVTQS	MEROPS:A01.010	Endopeptidase (input)	-20.73	MEROPS score threshold (-22.27)	71	87.48		CTSE
EALQGFARSVAAARGPAA	A7YY73	112	129	C-terminus	CTSE (P14091; CATE_HUMAN). Ctse (P16228; CATE_RAT). Ctse (P70269; CATE_MOUSE)	GPAALVAP	MEROPS:A01.010	Endopeptidase (input)	-21	MEROPS score threshold (-22.27)	71	87.48		CTSE
KGNGMVIEMKFSNMCNKSE	G7H7V7	302	320	N-terminus	CTSE (P14091; CATE_HUMAN). Ctse (P16228; CATE_RAT). Ctse (P70269; CATE_MOUSE)	KVSEKGNG	MEROPS:A01.010	Endopeptidase (input)	-22.15	MEROPS score threshold (-22.27)	71	87.48		CTSE
KGNGMVIEMKFSNMCNKSE	G7H7V7	302	320	C-terminus	CTSE (P14091; CATE_HUMAN). Ctse (P16228; CATE_RAT). Ctse (P70269; CATE_MOUSE)	NKSELMLQ	MEROPS:A01.010	Endopeptidase (input)	-22.16	MEROPS score threshold (-22.27)	71	87.48		CTSE
LTTSPQGHFVGSDWQ	E1BD59	617	631	N-terminus	CTSE (P14091; CATE_HUMAN). Ctse (P16228; CATE_RAT). Ctse (P70269; CATE_MOUSE)	ALVFLTTS	MEROPS:A01.010	Endopeptidase (input)	-18.37	MEROPS score threshold (-22.27)	71	87.48		CTSE
VINEMRRIARHFRFGNQ	E1B9W9	179	195	N-terminus	CTSE (P14091; CATE_HUMAN). Ctse (P16228; CATE_RAT). Ctse (P70269; CATE_MOUSE)	KPMFVINE	MEROPS:A01.010	Endopeptidase (input)	-21.49	MEROPS score threshold (-22.27)	71	87.48		CTSE
EFSVDIGRLAQE	A7Z050	1374	1385	C-terminus	CTSE (P14091; CATE_HUMAN). Ctse (P16228; CATE_RAT). Ctse (P70269; CATE_MOUSE)	LAQEASAI	MEROPS:A01.010	Endopeptidase (input)	-21.25	MEROPS score threshold (-22.27)	71	87.48		CTSE
ASLRAAKQADRRIKL	A7YW45	374	388	C-terminus	CTSE (P14091; CATE_HUMAN). Ctse (P16228; CATE_RAT). Ctse (P70269; CATE_MOUSE)	RIKLYAVE	MEROPS:A01.010	Endopeptidase (input)	-19.84	MEROPS score threshold (-22.27)	71	87.48		CTSE
LISKGKKTGAKGKR	A7YY35	804	817	N-terminus	CTSE (P14091; CATE_HUMAN). Ctse (P16228; CATE_RAT). Ctse (P70269; CATE_MOUSE)	KKSQLISK	MEROPS:A01.010	Endopeptidase (input)	-22.19	MEROPS score threshold (-22.27)	71	87.48		CTSE
FSELPEVLDQIQN	F1MCA7	196	208	N-terminus	CTSE (P14091; CATE_HUMAN). Ctse (P16228; CATE_RAT). Ctse (P70269; CATE_MOUSE)	GNNEFSEL	MEROPS:A01.010	Endopeptidase (input)	-21.1	MEROPS score threshold (-22.27)	71	87.48		CTSE
PLYITKVMSKSAA	O02675	249	261	C-terminus	CTSE (P14091; CATE_HUMAN). Ctse (P16228; CATE_RAT). Ctse (P70269; CATE_MOUSE)	KSAAEVIA	MEROPS:A01.010	Endopeptidase (input)	-20.84	MEROPS score threshold (-22.27)	71	87.48		CTSE
QVPLAHPMQMS	E1BPQ1	532	542	N-terminus	CTSE (P14091; CATE_HUMAN). Ctse (P16228; CATE_RAT). Ctse (P70269; CATE_MOUSE)	KTALQVPL	MEROPS:A01.010	Endopeptidase (input)	-21.42	MEROPS score threshold (-22.27)	71	87.48		CTSE
GTKGMGKETT	E1BP74	310	319	C-terminus	CTSE (P14091; CATE_HUMAN). Ctse (P16228; CATE_RAT). Ctse (P70269; CATE_MOUSE)	KETTLLLA	MEROPS:A01.010	Endopeptidase (input)	-20.74	MEROPS score threshold (-22.27)	71	87.48		CTSE
RSEPPSATPSPALSVESL	E1BBG2	487	504	C-terminus	CTSE (P14091; CATE_HUMAN). Ctse (P16228; CATE_RAT). Ctse (P70269; CATE_MOUSE)	VESLSSES	MEROPS:A01.010	Endopeptidase (input)	-19.22	MEROPS score threshold (-22.27)	71	87.48		CTSE
AGSGPAGVSSPRKGL	E1BBG2	108	122	C-terminus	CTSE (P14091; CATE_HUMAN). Ctse (P16228; CATE_RAT). Ctse (P70269; CATE_MOUSE)	RKGLVLSS	MEROPS:A01.010	Endopeptidase (input)	-19.79	MEROPS score threshold (-22.27)	71	87.48		CTSE
DAGGQSQEPEVLGRT	A8E4N3	69	83	N-terminus	CTSE (P14091; CATE_HUMAN). Ctse (P16228; CATE_RAT). Ctse (P70269; CATE_MOUSE)	VDQEDAGG	MEROPS:A01.010	Endopeptidase (input)	-21.22	MEROPS score threshold (-22.27)	71	87.48		CTSE
NGPGSRSKVPSGTNNHSL	A8E653	79	96	C-terminus	CTSE (P14091; CATE_HUMAN). Ctse (P16228; CATE_RAT). Ctse (P70269; CATE_MOUSE)	NHSLLQQE	MEROPS:A01.010	Endopeptidase (input)	-21.53	MEROPS score threshold (-22.27)	71	87.48		CTSE
AAPASTHTTAT	F1MCY2	248	258	C-terminus	CTSE (P14091; CATE_HUMAN). Ctse (P16228; CATE_RAT). Ctse (P70269; CATE_MOUSE)	TTATLSLT	MEROPS:A01.010	Endopeptidase (input)	-21.37	MEROPS score threshold (-22.27)	71	87.48		CTSE
DSEQGGEDPGKLSHATLKN	F1MCY2	96	114	N-terminus	CTSE (P14091; CATE_HUMAN). Ctse (P16228; CATE_RAT). Ctse (P70269; CATE_MOUSE)	LLLEDSEQ	MEROPS:A01.010	Endopeptidase (input)	-21.54	MEROPS score threshold (-22.27)	71	87.48		CTSE
GCHLPHTHSLPNRRVLTL	P05008	23	40	C-terminus	CTSE (P14091; CATE_HUMAN). Ctse (P16228; CATE_RAT). Ctse (P70269; CATE_MOUSE)	VLTLLRQL	MEROPS:A01.010	Endopeptidase (input)	-21.69	MEROPS score threshold (-22.27)	71	87.48		CTSE
AAEKKDSGPYKM	P01190	210	221	N-terminus	CTSE (P14091; CATE_HUMAN). Ctse (P16228; CATE_RAT). Ctse (P70269; CATE_MOUSE)	AEAEAAEK	MEROPS:A01.010	Endopeptidase (input)	-18.23	MEROPS score threshold (-22.27)	71	87.48		CTSE
AAVTAAAATAPAAEDAA	P06836	176	192	C-terminus	CTSE (P14091; CATE_HUMAN). Ctse (P16228; CATE_RAT). Ctse (P70269; CATE_MOUSE)	EDAAAMAT	MEROPS:A01.010	Endopeptidase (input)	-21.95	MEROPS score threshold (-22.27)	71	87.48		CTSE
LTSAPVPSTTTRSLTACP	P08037	118	135	N-terminus	CTSE (P14091; CATE_HUMAN). Ctse (P16228; CATE_RAT). Ctse (P70269; CATE_MOUSE)	PGSNLTSA	MEROPS:A01.010	Endopeptidase (input)	-22.03	MEROPS score threshold (-22.27)	71	87.48		CTSE
YRIIATTEG	P10861	163	171	C-terminus	CTSE (P14091; CATE_HUMAN). Ctse (P16228; CATE_RAT). Ctse (P70269; CATE_MOUSE)	TTEGLTGL	MEROPS:A01.010	Endopeptidase (input)	-21.95	MEROPS score threshold (-22.27)	71	87.48		CTSE
LSAGGAAAGVAGVAAA	P09851	87	102	N-terminus	CTSE (P14091; CATE_HUMAN). Ctse (P16228; CATE_RAT). Ctse (P70269; CATE_MOUSE)	GGVGLSAG	MEROPS:A01.010	Endopeptidase (input)	-21.12	MEROPS score threshold (-22.27)	71	87.48		CTSE
LSAGGAAAGVAGVAAA	P09851	87	102	C-terminus	CTSE (P14091; CATE_HUMAN). Ctse (P16228; CATE_RAT). Ctse (P70269; CATE_MOUSE)	VAAAAAGA	MEROPS:A01.010	Endopeptidase (input)	-20.25	MEROPS score threshold (-22.27)	71	87.48		CTSE
AIQKCDPAPFYL	O97594	1131	1142	N-terminus	CTSE (P14091; CATE_HUMAN). Ctse (P16228; CATE_RAT). Ctse (P70269; CATE_MOUSE)	ALIFAIQK	MEROPS:A01.010	Endopeptidase (input)	-19.45	MEROPS score threshold (-22.27)	71	87.48		CTSE
AIQKCDPAPFYL	O97594	1131	1142	C-terminus	CTSE (P14091; CATE_HUMAN). Ctse (P16228; CATE_RAT). Ctse (P70269; CATE_MOUSE)	PFYLFDEI	MEROPS:A01.010	Endopeptidase (input)	-21.17	MEROPS score threshold (-22.27)	71	87.48		CTSE
TRDMGGYSTTTDF	O77784	360	372	C-terminus	CTSE (P14091; CATE_HUMAN). Ctse (P16228; CATE_RAT). Ctse (P70269; CATE_MOUSE)	TTDFIKSV	MEROPS:A01.010	Endopeptidase (input)	-19.9	MEROPS score threshold (-22.27)	71	87.48		CTSE
KKNSPVLSLTADQM	P49884	303	316	C-terminus	CTSE (P14091; CATE_HUMAN). Ctse (P16228; CATE_RAT). Ctse (P70269; CATE_MOUSE)	ADQMISAL	MEROPS:A01.010	Endopeptidase (input)	-20.29	MEROPS score threshold (-22.27)	71	87.48		CTSE
SVVVGPSVVAV	P12763	290	300	N-terminus	CTSE (P14091; CATE_HUMAN). Ctse (P16228; CATE_RAT). Ctse (P70269; CATE_MOUSE)	PPVASVVV	MEROPS:A01.010	Endopeptidase (input)	-21.74	MEROPS score threshold (-22.27)	71	87.48		CTSE
DKSSLSSLDCL	P17667	197	207	C-terminus	CTSE (P14091; CATE_HUMAN). Ctse (P16228; CATE_RAT). Ctse (P70269; CATE_MOUSE)	LDCLSSIV	MEROPS:A01.010	Endopeptidase (input)	-20.94	MEROPS score threshold (-22.27)	71	87.48		CTSE
LVLLLVQVQPSLGKESA	P39873	14	30	N-terminus	CTSE (P14091; CATE_HUMAN). Ctse (P16228; CATE_RAT). Ctse (P70269; CATE_MOUSE)	SLLVLVLL	MEROPS:A01.010	Endopeptidase (input)	-21.35	MEROPS score threshold (-22.27)	71	87.48		CTSE
LVLLLVQVQPSLGKESA	P39873	14	30	C-terminus	CTSE (P14091; CATE_HUMAN). Ctse (P16228; CATE_RAT). Ctse (P70269; CATE_MOUSE)	KESAAAKF	MEROPS:A01.010	Endopeptidase (input)	-21.13	MEROPS score threshold (-22.27)	71	87.48		CTSE
LGLLSGPRSAH	P30404	12	22	N-terminus	CTSE (P14091; CATE_HUMAN). Ctse (P16228; CATE_RAT). Ctse (P70269; CATE_MOUSE)	GPRLLGLL	MEROPS:A01.010	Endopeptidase (input)	-20.17	MEROPS score threshold (-22.27)	71	87.48		CTSE
VAEEAPPPPPVVPS	P12661	707	720	N-terminus	CTSE (P14091; CATE_HUMAN). Ctse (P16228; CATE_RAT). Ctse (P70269; CATE_MOUSE)	PGEMVAEE	MEROPS:A01.010	Endopeptidase (input)	-18.88	MEROPS score threshold (-22.27)	71	87.48		CTSE
DSCIMSIGFDHMEGLQY	P22027	94	110	C-terminus	CTSE (P14091; CATE_HUMAN). Ctse (P16228; CATE_RAT). Ctse (P70269; CATE_MOUSE)	GLQYVEKI	MEROPS:A01.010	Endopeptidase (input)	-20.2	MEROPS score threshold (-22.27)	71	87.48		CTSE
MAVRNNLAGAE	P49951	351	361	C-terminus	CTSE (P14091; CATE_HUMAN). Ctse (P16228; CATE_RAT). Ctse (P70269; CATE_MOUSE)	AGAEELFA	MEROPS:A01.010	Endopeptidase (input)	-21.68	MEROPS score threshold (-22.27)	71	87.48		CTSE
SVLPSGEGHLETSS	P13608	1249	1262	N-terminus	CTSE (P14091; CATE_HUMAN). Ctse (P16228; CATE_RAT). Ctse (P70269; CATE_MOUSE)	VEDLSVLP	MEROPS:A01.010	Endopeptidase (input)	-18.71	MEROPS score threshold (-22.27)	71	87.48		CTSE
LDLQVISPQPRSIGLIAG	Q08DK1	228	245	N-terminus	CTSE (P14091; CATE_HUMAN). Ctse (P16228; CATE_RAT). Ctse (P70269; CATE_MOUSE)	STCLLDLQ	MEROPS:A01.010	Endopeptidase (input)	-20.09	MEROPS score threshold (-22.27)	71	87.48		CTSE
LDLQVISPQPRSIGLIAG	Q08DK1	228	245	C-terminus	CTSE (P14091; CATE_HUMAN). Ctse (P16228; CATE_RAT). Ctse (P70269; CATE_MOUSE)	LIAGAIGT	MEROPS:A01.010	Endopeptidase (input)	-22.09	MEROPS score threshold (-22.27)	71	87.48		CTSE
VKGGYTLDANKGGGHQT	Q01107	784	800	N-terminus	CTSE (P14091; CATE_HUMAN). Ctse (P16228; CATE_RAT). Ctse (P70269; CATE_MOUSE)	SFEMVKGG	MEROPS:A01.010	Endopeptidase (input)	-20.24	MEROPS score threshold (-22.27)	71	87.48		CTSE
LSDPQERAWYDNHREAL	Q0II91	56	72	C-terminus	CTSE (P14091; CATE_HUMAN). Ctse (P16228; CATE_RAT). Ctse (P70269; CATE_MOUSE)	REALLKGG	MEROPS:A01.010	Endopeptidase (input)	-18.15	MEROPS score threshold (-22.27)	71	87.48		CTSE
LLAGLGHEER	P79114	266	275	N-terminus	CTSE (P14091; CATE_HUMAN). Ctse (P16228; CATE_RAT). Ctse (P70269; CATE_MOUSE)	IFYALLAG	MEROPS:A01.010	Endopeptidase (input)	-22.27	MEROPS score threshold (-22.27)	71	87.48		CTSE
FGLRSLLANEEGWPILLGL	P58353	180	198	C-terminus	CTSE (P14091; CATE_HUMAN). Ctse (P16228; CATE_RAT). Ctse (P70269; CATE_MOUSE)	LLGLTGIP	MEROPS:A01.010	Endopeptidase (input)	-21.44	MEROPS score threshold (-22.27)	71	87.48		CTSE
LSAQKDTLLARHG	Q08DF2	494	506	N-terminus	CTSE (P14091; CATE_HUMAN). Ctse (P16228; CATE_RAT). Ctse (P70269; CATE_MOUSE)	MRNLLSAQ	MEROPS:A01.010	Endopeptidase (input)	-21.18	MEROPS score threshold (-22.27)	71	87.48		CTSE
VQSLEASILNDTSGDYE	P81282	2281	2297	N-terminus	CTSE (P14091; CATE_HUMAN). Ctse (P16228; CATE_RAT). Ctse (P70269; CATE_MOUSE)	LTSQVQSL	MEROPS:A01.010	Endopeptidase (input)	-21.7	MEROPS score threshold (-22.27)	71	87.48		CTSE
VEVEFGGGAELL	Q148F0	7	18	C-terminus	CTSE (P14091; CATE_HUMAN). Ctse (P16228; CATE_RAT). Ctse (P70269; CATE_MOUSE)	AELLFDGV	MEROPS:A01.010	Endopeptidase (input)	-20.05	MEROPS score threshold (-22.27)	71	87.48		CTSE
ASAVVAVGAGGAPAGPA	Q0P5L0	230	246	N-terminus	CTSE (P14091; CATE_HUMAN). Ctse (P16228; CATE_RAT). Ctse (P70269; CATE_MOUSE)	GLEEASAV	MEROPS:A01.010	Endopeptidase (input)	-19.35	MEROPS score threshold (-22.27)	71	87.48		CTSE
WVLALVFGLSLVYF	Q17QN8	17	30	C-terminus	CTSE (P14091; CATE_HUMAN). Ctse (P16228; CATE_RAT). Ctse (P70269; CATE_MOUSE)	LVYFLTST	MEROPS:A01.010	Endopeptidase (input)	-20.05	MEROPS score threshold (-22.27)	71	87.48		CTSE
METLSYSYC	Q0VCY6	150	158	N-terminus	CTSE (P14091; CATE_HUMAN). Ctse (P16228; CATE_RAT). Ctse (P70269; CATE_MOUSE)	VPSLMETL	MEROPS:A01.010	Endopeptidase (input)	-20.65	MEROPS score threshold (-22.27)	71	87.48		CTSE
VSAVLRASYGQS	Q0P5H1	208	219	N-terminus	CTSE (P14091; CATE_HUMAN). Ctse (P16228; CATE_RAT). Ctse (P70269; CATE_MOUSE)	IDDVVSAV	MEROPS:A01.010	Endopeptidase (input)	-22.21	MEROPS score threshold (-22.27)	71	87.48		CTSE
EWLKMSYPAKVT	Q0VC58	175	186	C-terminus	CTSE (P14091; CATE_HUMAN). Ctse (P16228; CATE_RAT). Ctse (P70269; CATE_MOUSE)	AKVTLLGS	MEROPS:A01.010	Endopeptidase (input)	-21.83	MEROPS score threshold (-22.27)	71	87.48		CTSE
DWFTAETLGVSGTL	Q148G5	299	312	C-terminus	CTSE (P14091; CATE_HUMAN). Ctse (P16228; CATE_RAT). Ctse (P70269; CATE_MOUSE)	SGTLDLLD	MEROPS:A01.010	Endopeptidase (input)	-20.84	MEROPS score threshold (-22.27)	71	87.48		CTSE
ALALPGEPPVPAAPAGE	Q1LZD9	35	51	N-terminus	CTSE (P14091; CATE_HUMAN). Ctse (P16228; CATE_RAT). Ctse (P70269; CATE_MOUSE)	PAALALAL	MEROPS:A01.010	Endopeptidase (input)	-18.36	MEROPS score threshold (-22.27)	71	87.48		CTSE
AAAAAAAGAAGGRGS	Q28165	5	19	N-terminus	CTSE (P14091; CATE_HUMAN). Ctse (P16228; CATE_RAT). Ctse (P70269; CATE_MOUSE)	MAAAAAAA	MEROPS:A01.010	Endopeptidase (input)	-21.28	MEROPS score threshold (-22.27)	71	87.48		CTSE
CHWSSSSGSSSSEEMF	Q27967	128	143	C-terminus	CTSE (P14091; CATE_HUMAN). Ctse (P16228; CATE_RAT). Ctse (P70269; CATE_MOUSE)	EEMFFGDI	MEROPS:A01.010	Endopeptidase (input)	-21.58	MEROPS score threshold (-22.27)	71	87.48		CTSE
YVLDGRLGTEKESPTVE	Q29RZ4	128	144	N-terminus	CTSE (P14091; CATE_HUMAN). Ctse (P16228; CATE_RAT). Ctse (P70269; CATE_MOUSE)	KVEVYVLD	MEROPS:A01.010	Endopeptidase (input)	-21.96	MEROPS score threshold (-22.27)	71	87.48		CTSE
YVLDGRLGTEKESPTVE	Q29RZ4	128	144	C-terminus	CTSE (P14091; CATE_HUMAN). Ctse (P16228; CATE_RAT). Ctse (P70269; CATE_MOUSE)	PTVEACKK	MEROPS:A01.010	Endopeptidase (input)	-20.85	MEROPS score threshold (-22.27)	71	87.48		CTSE
NSNVENLPPHIIRL	Q1RML1	2	15	C-terminus	CTSE (P14091; CATE_HUMAN). Ctse (P16228; CATE_RAT). Ctse (P70269; CATE_MOUSE)	IIRLVYKE	MEROPS:A01.010	Endopeptidase (input)	-21.49	MEROPS score threshold (-22.27)	71	87.48		CTSE
DSSMMPIMGY	Q27963	402	411	C-terminus	CTSE (P14091; CATE_HUMAN). Ctse (P16228; CATE_RAT). Ctse (P70269; CATE_MOUSE)	IMGYLVDL	MEROPS:A01.010	Endopeptidase (input)	-22.04	MEROPS score threshold (-22.27)	71	87.48		CTSE
SKSKSASFKESYMAAFYE	Q28013	526	543	N-terminus	CTSE (P14091; CATE_HUMAN). Ctse (P16228; CATE_RAT). Ctse (P70269; CATE_MOUSE)	LGSLSKSK	MEROPS:A01.010	Endopeptidase (input)	-20.21	MEROPS score threshold (-22.27)	71	87.48		CTSE
QGEGDIIPKISELSL	Q29RT6	391	405	N-terminus	CTSE (P14091; CATE_HUMAN). Ctse (P16228; CATE_RAT). Ctse (P70269; CATE_MOUSE)	ILHLQGEG	MEROPS:A01.010	Endopeptidase (input)	-21.85	MEROPS score threshold (-22.27)	71	87.48		CTSE
QGEGDIIPKISELSL	Q29RT6	391	405	C-terminus	CTSE (P14091; CATE_HUMAN). Ctse (P16228; CATE_RAT). Ctse (P70269; CATE_MOUSE)	ELSLCDLA	MEROPS:A01.010	Endopeptidase (input)	-20.16	MEROPS score threshold (-22.27)	71	87.48		CTSE
LGAGPASISCASFLAR	Q28007	193	208	N-terminus	CTSE (P14091; CATE_HUMAN). Ctse (P16228; CATE_RAT). Ctse (P70269; CATE_MOUSE)	KIALLGAG	MEROPS:A01.010	Endopeptidase (input)	-18.25	MEROPS score threshold (-22.27)	71	87.48		CTSE
LVGVTAACTVRKRC	Q1RMT1	348	361	C-terminus	CTSE (P14091; CATE_HUMAN). Ctse (P16228; CATE_RAT). Ctse (P70269; CATE_MOUSE)	RKRCLVLG	MEROPS:A01.010	Endopeptidase (input)	-21.7	MEROPS score threshold (-22.27)	71	87.48		CTSE
AVATSKPGLRP	Q1LZG6	31	41	N-terminus	CTSE (P14091; CATE_HUMAN). Ctse (P16228; CATE_RAT). Ctse (P70269; CATE_MOUSE)	VPVAAVAT	MEROPS:A01.010	Endopeptidase (input)	-21.14	MEROPS score threshold (-22.27)	71	87.48		CTSE
SRGDVGAWVREAAM	Q28205	871	884	C-terminus	CTSE (P14091; CATE_HUMAN). Ctse (P16228; CATE_RAT). Ctse (P70269; CATE_MOUSE)	EAAMTSLM	MEROPS:A01.010	Endopeptidase (input)	-22.12	MEROPS score threshold (-22.27)	71	87.48		CTSE
TSSGSPPGLAAVPVE	Q2KIS6	72	86	C-terminus	CTSE (P14091; CATE_HUMAN). Ctse (P16228; CATE_RAT). Ctse (P70269; CATE_MOUSE)	VPVESAME	MEROPS:A01.010	Endopeptidase (input)	-22.17	MEROPS score threshold (-22.27)	71	87.48		CTSE
ETNSRLDSVLL	Q2KID0	99	109	C-terminus	CTSE (P14091; CATE_HUMAN). Ctse (P16228; CATE_RAT). Ctse (P70269; CATE_MOUSE)	SVLLLSSM	MEROPS:A01.010	Endopeptidase (input)	-19.8	MEROPS score threshold (-22.27)	71	87.48		CTSE
QLELRAGAEQLDAL	Q2KI74	115	128	C-terminus	CTSE (P14091; CATE_HUMAN). Ctse (P16228; CATE_RAT). Ctse (P70269; CATE_MOUSE)	LDALLTNE	MEROPS:A01.010	Endopeptidase (input)	-18.32	MEROPS score threshold (-22.27)	71	87.48		CTSE
STHGSLSGLGLMGIKDE	Q2T9U5	745	761	C-terminus	CTSE (P14091; CATE_HUMAN). Ctse (P16228; CATE_RAT). Ctse (P70269; CATE_MOUSE)	IKDEEEST	MEROPS:A01.010	Endopeptidase (input)	-21.79	MEROPS score threshold (-22.27)	71	87.48		CTSE
ASTFLSPAFPGSQT	Q2LGB3	139	152	N-terminus	CTSE (P14091; CATE_HUMAN). Ctse (P16228; CATE_RAT). Ctse (P70269; CATE_MOUSE)	LPSLASTF	MEROPS:A01.010	Endopeptidase (input)	-20.64	MEROPS score threshold (-22.27)	71	87.48		CTSE
YITEAELVAGNGYR	Q2KHY5	61	74	N-terminus	CTSE (P14091; CATE_HUMAN). Ctse (P16228; CATE_RAT). Ctse (P70269; CATE_MOUSE)	SCILYITE	MEROPS:A01.010	Endopeptidase (input)	-21.68	MEROPS score threshold (-22.27)	71	87.48		CTSE
STFSHFSLFHMAAN	Q2KHV4	210	223	N-terminus	CTSE (P14091; CATE_HUMAN). Ctse (P16228; CATE_RAT). Ctse (P70269; CATE_MOUSE)	PMLLSTFS	MEROPS:A01.010	Endopeptidase (input)	-22.04	MEROPS score threshold (-22.27)	71	87.48		CTSE
GPRVKDGGALGTKAAQ	Q2HJ91	267	282	C-terminus	CTSE (P14091; CATE_HUMAN). Ctse (P16228; CATE_RAT). Ctse (P70269; CATE_MOUSE)	KAAQAKAA	MEROPS:A01.010	Endopeptidase (input)	-21.87	MEROPS score threshold (-22.27)	71	87.48		CTSE
HGESLGDRHLRTLQISY	Q2KJD6	179	195	C-terminus	CTSE (P14091; CATE_HUMAN). Ctse (P16228; CATE_RAT). Ctse (P70269; CATE_MOUSE)	QISYEALK	MEROPS:A01.010	Endopeptidase (input)	-20.74	MEROPS score threshold (-22.27)	71	87.48		CTSE
LTQYTKFAQM	Q2T9U1	421	430	N-terminus	CTSE (P14091; CATE_HUMAN). Ctse (P16228; CATE_RAT). Ctse (P70269; CATE_MOUSE)	VQELLTQY	MEROPS:A01.010	Endopeptidase (input)	-20.38	MEROPS score threshold (-22.27)	71	87.48		CTSE
AEFTAKIALLEEAKKKKEE	Q32LP2	422	440	N-terminus	CTSE (P14091; CATE_HUMAN). Ctse (P16228; CATE_RAT). Ctse (P70269; CATE_MOUSE)	AAELAEFT	MEROPS:A01.010	Endopeptidase (input)	-19.61	MEROPS score threshold (-22.27)	71	87.48		CTSE
AEFTAKIALLEEAKKKKEE	Q32LP2	422	440	C-terminus	CTSE (P14091; CATE_HUMAN). Ctse (P16228; CATE_RAT). Ctse (P70269; CATE_MOUSE)	KKEEEATE	MEROPS:A01.010	Endopeptidase (input)	-20.45	MEROPS score threshold (-22.27)	71	87.48		CTSE
AKQGLKKPVRGKQA	Q2YDJ8	153	166	N-terminus	CTSE (P14091; CATE_HUMAN). Ctse (P16228; CATE_RAT). Ctse (P70269; CATE_MOUSE)	NAAAAKQG	MEROPS:A01.010	Endopeptidase (input)	-21.92	MEROPS score threshold (-22.27)	71	87.48		CTSE
GEGGRKNSSNFKK	Q32PJ8	427	439	N-terminus	CTSE (P14091; CATE_HUMAN). Ctse (P16228; CATE_RAT). Ctse (P70269; CATE_MOUSE)	SDEEGEGG	MEROPS:A01.010	Endopeptidase (input)	-21.92	MEROPS score threshold (-22.27)	71	87.48		CTSE
FTAIAGSEIFSLEM	Q2TBU9	100	113	C-terminus	CTSE (P14091; CATE_HUMAN). Ctse (P16228; CATE_RAT). Ctse (P70269; CATE_MOUSE)	SLEMSKTE	MEROPS:A01.010	Endopeptidase (input)	-21.27	MEROPS score threshold (-22.27)	71	87.48		CTSE
AAMAVDKSNSTSKH	Q32LB3	118	131	N-terminus	CTSE (P14091; CATE_HUMAN). Ctse (P16228; CATE_RAT). Ctse (P70269; CATE_MOUSE)	HDLAAAMA	MEROPS:A01.010	Endopeptidase (input)	-21.89	MEROPS score threshold (-22.27)	71	87.48		CTSE
GNQRELARQKNMKKSQE	Q32P76	4	20	C-terminus	CTSE (P14091; CATE_HUMAN). Ctse (P16228; CATE_RAT). Ctse (P70269; CATE_MOUSE)	KSQEISKG	MEROPS:A01.010	Endopeptidase (input)	-20.09	MEROPS score threshold (-22.27)	71	87.48		CTSE
GEAANPKPLGVSEEKDQEP	Q32LK9	302	320	N-terminus	CTSE (P14091; CATE_HUMAN). Ctse (P16228; CATE_RAT). Ctse (P70269; CATE_MOUSE)	EAGLGEAA	MEROPS:A01.010	Endopeptidase (input)	-21.45	MEROPS score threshold (-22.27)	71	87.48		CTSE
TSVPPAEGSCPSNAL	Q3SX17	4	18	C-terminus	CTSE (P14091; CATE_HUMAN). Ctse (P16228; CATE_RAT). Ctse (P70269; CATE_MOUSE)	SNALITKQ	MEROPS:A01.010	Endopeptidase (input)	-19.38	MEROPS score threshold (-22.27)	71	87.48		CTSE
PGSTCRDHEKEL	Q3SYW2	597	608	C-terminus	CTSE (P14091; CATE_HUMAN). Ctse (P16228; CATE_RAT). Ctse (P70269; CATE_MOUSE)	EKELLNQV	MEROPS:A01.010	Endopeptidase (input)	-19.97	MEROPS score threshold (-22.27)	71	87.48		CTSE
SAADAQAIADMAAYQLEL	Q3SZC2	68	85	N-terminus	CTSE (P14091; CATE_HUMAN). Ctse (P16228; CATE_RAT). Ctse (P70269; CATE_MOUSE)	ALSGSAAD	MEROPS:A01.010	Endopeptidase (input)	-22.07	MEROPS score threshold (-22.27)	71	87.48		CTSE
ESVPTAIYCF	Q3SYV9	276	285	N-terminus	CTSE (P14091; CATE_HUMAN). Ctse (P16228; CATE_RAT). Ctse (P70269; CATE_MOUSE)	IAAFESVP	MEROPS:A01.010	Endopeptidase (input)	-21.05	MEROPS score threshold (-22.27)	71	87.48		CTSE
LASGEGAAAGLPALD	Q3SX44	23	37	N-terminus	CTSE (P14091; CATE_HUMAN). Ctse (P16228; CATE_RAT). Ctse (P70269; CATE_MOUSE)	VPESLASG	MEROPS:A01.010	Endopeptidase (input)	-21.49	MEROPS score threshold (-22.27)	71	87.48		CTSE
LASGEGAAAGLPALD	Q3SX44	23	37	C-terminus	CTSE (P14091; CATE_HUMAN). Ctse (P16228; CATE_RAT). Ctse (P70269; CATE_MOUSE)	PALDLAKA	MEROPS:A01.010	Endopeptidase (input)	-20.75	MEROPS score threshold (-22.27)	71	87.48		CTSE
LIPMIGFIGLGMGSAALYL	Q3SZ44	20	38	C-terminus	CTSE (P14091; CATE_HUMAN). Ctse (P16228; CATE_RAT). Ctse (P70269; CATE_MOUSE)	ALYLLRLA	MEROPS:A01.010	Endopeptidase (input)	-20.67	MEROPS score threshold (-22.27)	71	87.48		CTSE
LLLQDFSRNLSAKSSAL	Q3SZ87	15	31	N-terminus	CTSE (P14091; CATE_HUMAN). Ctse (P16228; CATE_RAT). Ctse (P70269; CATE_MOUSE)	SEEDLLLQ	MEROPS:A01.010	Endopeptidase (input)	-20.34	MEROPS score threshold (-22.27)	71	87.48		CTSE
LLLQDFSRNLSAKSSAL	Q3SZ87	15	31	C-terminus	CTSE (P14091; CATE_HUMAN). Ctse (P16228; CATE_RAT). Ctse (P70269; CATE_MOUSE)	SSALFFGN	MEROPS:A01.010	Endopeptidase (input)	-21.93	MEROPS score threshold (-22.27)	71	87.48		CTSE
AKLITVNTPDLV	Q3MHE8	537	548	N-terminus	CTSE (P14091; CATE_HUMAN). Ctse (P16228; CATE_RAT). Ctse (P70269; CATE_MOUSE)	MTALAKLI	MEROPS:A01.010	Endopeptidase (input)	-20.03	MEROPS score threshold (-22.27)	71	87.48		CTSE
LSAGENVLPSTMQPGDD	Q58DA4	141	157	N-terminus	CTSE (P14091; CATE_HUMAN). Ctse (P16228; CATE_RAT). Ctse (P70269; CATE_MOUSE)	FFVSLSAG	MEROPS:A01.010	Endopeptidase (input)	-22.05	MEROPS score threshold (-22.27)	71	87.48		CTSE
LSAGENVLPSTMQPGDD	Q58DA4	141	157	C-terminus	CTSE (P14091; CATE_HUMAN). Ctse (P16228; CATE_RAT). Ctse (P70269; CATE_MOUSE)	PGDDVVSN	MEROPS:A01.010	Endopeptidase (input)	-21.11	MEROPS score threshold (-22.27)	71	87.48		CTSE
QLHTLDTDLHSLAQIGGKS	Q5BIM2	182	200	C-terminus	CTSE (P14091; CATE_HUMAN). Ctse (P16228; CATE_RAT). Ctse (P70269; CATE_MOUSE)	GGKSLVSG	MEROPS:A01.010	Endopeptidase (input)	-22.04	MEROPS score threshold (-22.27)	71	87.48		CTSE
AVGMPANAVTLWMLFRT	Q58D85	106	122	N-terminus	CTSE (P14091; CATE_HUMAN). Ctse (P16228; CATE_RAT). Ctse (P70269; CATE_MOUSE)	ILVFAVGM	MEROPS:A01.010	Endopeptidase (input)	-19.73	MEROPS score threshold (-22.27)	71	87.48		CTSE
GLKGGGVCFNSQPSS	Q3ZBG8	119	133	N-terminus	CTSE (P14091; CATE_HUMAN). Ctse (P16228; CATE_RAT). Ctse (P70269; CATE_MOUSE)	SKELGLKG	MEROPS:A01.010	Endopeptidase (input)	-20.39	MEROPS score threshold (-22.27)	71	87.48		CTSE
EALSVAKMQVEMGA	Q4JIJ3	397	410	N-terminus	CTSE (P14091; CATE_HUMAN). Ctse (P16228; CATE_RAT). Ctse (P70269; CATE_MOUSE)	GNYEEALS	MEROPS:A01.010	Endopeptidase (input)	-21.98	MEROPS score threshold (-22.27)	71	87.48		CTSE
AFNIVYVAL	Q58DA8	200	208	C-terminus	CTSE (P14091; CATE_HUMAN). Ctse (P16228; CATE_RAT). Ctse (P70269; CATE_MOUSE)	YVALKSLK	MEROPS:A01.010	Endopeptidase (input)	-20.2	MEROPS score threshold (-22.27)	71	87.48		CTSE
ASEGGAEDGASGVGGSA	Q59HJ6	86	102	N-terminus	CTSE (P14091; CATE_HUMAN). Ctse (P16228; CATE_RAT). Ctse (P70269; CATE_MOUSE)	GGEDASEG	MEROPS:A01.010	Endopeptidase (input)	-20.43	MEROPS score threshold (-22.27)	71	87.48		CTSE
ASSLLQKSKLGFL	Q58DC2	124	136	C-terminus	CTSE (P14091; CATE_HUMAN). Ctse (P16228; CATE_RAT). Ctse (P70269; CATE_MOUSE)	LGFLNATS	MEROPS:A01.010	Endopeptidase (input)	-22.09	MEROPS score threshold (-22.27)	71	87.48		CTSE
RHRSGMVTAA	Q3ZBI5	20	29	C-terminus	CTSE (P14091; CATE_HUMAN). Ctse (P16228; CATE_RAT). Ctse (P70269; CATE_MOUSE)	VTAASQGG	MEROPS:A01.010	Endopeptidase (input)	-22.11	MEROPS score threshold (-22.27)	71	87.48		CTSE
EPLGAMAASEDEEE	Q58CS7	192	205	C-terminus	CTSE (P14091; CATE_HUMAN). Ctse (P16228; CATE_RAT). Ctse (P70269; CATE_MOUSE)	DEEEEEEA	MEROPS:A01.010	Endopeptidase (input)	-19.55	MEROPS score threshold (-22.27)	71	87.48		CTSE
AAVWADPGKYALMGAA	Q4PKH3	542	557	C-terminus	CTSE (P14091; CATE_HUMAN). Ctse (P16228; CATE_RAT). Ctse (P70269; CATE_MOUSE)	MGAAAQLG	MEROPS:A01.010	Endopeptidase (input)	-21.8	MEROPS score threshold (-22.27)	71	87.48		CTSE
AFVGLKRAFRKAPLLY	Q52QI2	838	853	N-terminus	CTSE (P14091; CATE_HUMAN). Ctse (P16228; CATE_RAT). Ctse (P70269; CATE_MOUSE)	EEQEAFVG	MEROPS:A01.010	Endopeptidase (input)	-21.23	MEROPS score threshold (-22.27)	71	87.48		CTSE
LVLLSLDYLTSLF	Q58DD2	383	395	N-terminus	CTSE (P14091; CATE_HUMAN). Ctse (P16228; CATE_RAT). Ctse (P70269; CATE_MOUSE)	MTGALVLL	MEROPS:A01.010	Endopeptidase (input)	-22.04	MEROPS score threshold (-22.27)	71	87.48		CTSE
AIIIGFGQIKNLLGLQH	Q58DD2	158	174	N-terminus	CTSE (P14091; CATE_HUMAN). Ctse (P16228; CATE_RAT). Ctse (P70269; CATE_MOUSE)	TSAAAIII	MEROPS:A01.010	Endopeptidase (input)	-21.85	MEROPS score threshold (-22.27)	71	87.48		CTSE
PSARSTQGATGRRDDPDVF	Q3ZBB1	106	124	C-terminus	CTSE (P14091; CATE_HUMAN). Ctse (P16228; CATE_RAT). Ctse (P70269; CATE_MOUSE)	PDVFLKTP	MEROPS:A01.010	Endopeptidase (input)	-19.18	MEROPS score threshold (-22.27)	71	87.48		CTSE
GWEYAFEGTAGRF	Q3T110	126	138	C-terminus	CTSE (P14091; CATE_HUMAN). Ctse (P16228; CATE_RAT). Ctse (P70269; CATE_MOUSE)	AGRFLTDS	MEROPS:A01.010	Endopeptidase (input)	-20.93	MEROPS score threshold (-22.27)	71	87.48		CTSE
KYWSFSISPSHEY	Q58CX2	476	488	C-terminus	CTSE (P14091; CATE_HUMAN). Ctse (P16228; CATE_RAT). Ctse (P70269; CATE_MOUSE)	LDRLSLAQ	MEROPS:A01.010	Endopeptidase (input)	-21.01	MEROPS score threshold (-22.27)	71	87.48		CTSE
VFAQADGSAYIEQGNTKA	Q7YRA3	31	48	C-terminus	CTSE (P14091; CATE_HUMAN). Ctse (P16228; CATE_RAT). Ctse (P70269; CATE_MOUSE)	NTKALAVV	MEROPS:A01.010	Endopeptidase (input)	-21.68	MEROPS score threshold (-22.27)	71	87.48		CTSE
AAAAAAAGPGSPGAAAVVK	Q6VFT7	229	247	N-terminus	CTSE (P14091; CATE_HUMAN). Ctse (P16228; CATE_RAT). Ctse (P70269; CATE_MOUSE)	AAAAAAAA	MEROPS:A01.010	Endopeptidase (input)	-19.63	MEROPS score threshold (-22.27)	71	87.48		CTSE
LHRDMKAANVLITRDGVL	Q5EAB2	146	163	C-terminus	CTSE (P14091; CATE_HUMAN). Ctse (P16228; CATE_RAT). Ctse (P70269; CATE_MOUSE)	DGVLKLAD	MEROPS:A01.010	Endopeptidase (input)	-21.15	MEROPS score threshold (-22.27)	71	87.48		CTSE
LPQLEPAEEAARLHAE	Q5QQ49	789	804	C-terminus	CTSE (P14091; CATE_HUMAN). Ctse (P16228; CATE_RAT). Ctse (P70269; CATE_MOUSE)	LHAELTGP	MEROPS:A01.010	Endopeptidase (input)	-22.13	MEROPS score threshold (-22.27)	71	87.48		CTSE
LTKFFYAISSSKSSNV	Q5BIM9	363	378	C-terminus	CTSE (P14091; CATE_HUMAN). Ctse (P16228; CATE_RAT). Ctse (P70269; CATE_MOUSE)	SSNVIVLL	MEROPS:A01.010	Endopeptidase (input)	-21.73	MEROPS score threshold (-22.27)	71	87.48		CTSE
DVNDLDTDSFLGGLKWC	Q865B7	40	56	N-terminus	CTSE (P14091; CATE_HUMAN). Ctse (P16228; CATE_RAT). Ctse (P70269; CATE_MOUSE)	LSELDVND	MEROPS:A01.010	Endopeptidase (input)	-20.11	MEROPS score threshold (-22.27)	71	87.48		CTSE
SAVWGPLGEC	Q5E966	151	160	C-terminus	CTSE (P14091; CATE_HUMAN). Ctse (P16228; CATE_RAT). Ctse (P70269; CATE_MOUSE)	LGECIIAG	MEROPS:A01.010	Endopeptidase (input)	-21.29	MEROPS score threshold (-22.27)	71	87.48		CTSE
EGDTPQHLSPVQLLHQLQA	Q8MJ05	1074	1092	N-terminus	CTSE (P14091; CATE_HUMAN). Ctse (P16228; CATE_RAT). Ctse (P70269; CATE_MOUSE)	QVDLEGDT	MEROPS:A01.010	Endopeptidase (input)	-20.13	MEROPS score threshold (-22.27)	71	87.48		CTSE
NGGLPQTTSEKS	Q8MJ05	562	573	C-terminus	CTSE (P14091; CATE_HUMAN). Ctse (P16228; CATE_RAT). Ctse (P70269; CATE_MOUSE)	SEKSIVEE	MEROPS:A01.010	Endopeptidase (input)	-21.58	MEROPS score threshold (-22.27)	71	87.48		CTSE
LKEISSTSQTLLYT	Q8MJ08	391	404	N-terminus	CTSE (P14091; CATE_HUMAN). Ctse (P16228; CATE_RAT). Ctse (P70269; CATE_MOUSE)	LSRELKEI	MEROPS:A01.010	Endopeptidase (input)	-21.79	MEROPS score threshold (-22.27)	71	87.48		CTSE
ASSTHGRNFVSFR	Q8SQG8	262	274	N-terminus	CTSE (P14091; CATE_HUMAN). Ctse (P16228; CATE_RAT). Ctse (P70269; CATE_MOUSE)	EETLASST	MEROPS:A01.010	Endopeptidase (input)	-18.69	MEROPS score threshold (-22.27)	71	87.48		CTSE
VAKEAQYEFEFAARQFM	Q8SQG8	174	190	N-terminus	CTSE (P14091; CATE_HUMAN). Ctse (P16228; CATE_RAT). Ctse (P70269; CATE_MOUSE)	PPERVAKE	MEROPS:A01.010	Endopeptidase (input)	-22.25	MEROPS score threshold (-22.27)	71	87.48		CTSE
VSFAFALHEQPEL	Q8SQA4	373	385	N-terminus	CTSE (P14091; CATE_HUMAN). Ctse (P16228; CATE_RAT). Ctse (P70269; CATE_MOUSE)	LDSNVSFA	MEROPS:A01.010	Endopeptidase (input)	-22.2	MEROPS score threshold (-22.27)	71	87.48		CTSE
LQAPFTDCGDGPML	Q9TU34	523	536	N-terminus	CTSE (P14091; CATE_HUMAN). Ctse (P16228; CATE_RAT). Ctse (P70269; CATE_MOUSE)	IFKLLQAP	MEROPS:A01.010	Endopeptidase (input)	-20.93	MEROPS score threshold (-22.27)	71	87.48		CTSE
EQANEDPSDSTESEEV	Q95120	60	75	N-terminus	CTSE (P14091; CATE_HUMAN). Ctse (P16228; CATE_RAT). Ctse (P70269; CATE_MOUSE)	LSSEEQAN	MEROPS:A01.010	Endopeptidase (input)	-21.98	MEROPS score threshold (-22.27)	71	87.48		CTSE
EQANEDPSDSTESEEV	Q95120	60	75	C-terminus	CTSE (P14091; CATE_HUMAN). Ctse (P16228; CATE_RAT). Ctse (P70269; CATE_MOUSE)	SEEVLGLD	MEROPS:A01.010	Endopeptidase (input)	-22.04	MEROPS score threshold (-22.27)	71	87.48		CTSE
YGASPDIDTGTGPTPT	Q9GLE5	446	461	N-terminus	CTSE (P14091; CATE_HUMAN). Ctse (P16228; CATE_RAT). Ctse (P70269; CATE_MOUSE)	IQELYGAS	MEROPS:A01.010	Endopeptidase (input)	-20.84	MEROPS score threshold (-22.27)	71	87.48		CTSE
YLLTYMASFNLVYLFTVR	A4FUB8	117	134	N-terminus	Ctsb (P00787; CATB_RAT). CTSB (P07858; CATB_HUMAN). Ctsb (P10605; CATB_MOUSE)	GAFAYLLT	MEROPS:C01.060	Endopeptidase (input)	-21.25	MEROPS score threshold (-23.76)	79	80.99		Ctsb
YLLTYMASFNLVYLFTVR	A4FUB8	117	134	C-terminus	Ctsb (P00787; CATB_RAT). CTSB (P07858; CATB_HUMAN). Ctsb (P10605; CATB_MOUSE)	FTVRIHGA	MEROPS:C01.060	Endopeptidase (input)	-22.13	MEROPS score threshold (-23.76)	79	80.99		Ctsb
AVAGTAKNYNYNQQGPP	A2VE23	457	473	N-terminus	Ctsb (P00787; CATB_RAT). CTSB (P07858; CATB_HUMAN). Ctsb (P10605; CATB_MOUSE)	GWQDAVAG	MEROPS:C01.060	Endopeptidase (input)	-22.85	MEROPS score threshold (-23.76)	79	80.99		Ctsb
PATFGHLAGG	A2VDQ5	619	628	C-terminus	Ctsb (P00787; CATB_RAT). CTSB (P07858; CATB_HUMAN). Ctsb (P10605; CATB_MOUSE)	LAGGYDGQ	MEROPS:C01.060	Endopeptidase (input)	-22.24	MEROPS score threshold (-23.76)	79	80.99		Ctsb
LGSRPLSTAMPPPPG	A1A4J8	62	76	C-terminus	Ctsb (P00787; CATB_RAT). CTSB (P07858; CATB_HUMAN). Ctsb (P10605; CATB_MOUSE)	PPPGSSGP	MEROPS:C01.060	Endopeptidase (input)	-18.45	MEROPS score threshold (-23.76)	79	80.99		Ctsb
DALVVPVGGGGMLAGIAVT	A0JNI4	178	196	C-terminus	Ctsb (P00787; CATB_RAT). CTSB (P07858; CATB_HUMAN). Ctsb (P10605; CATB_MOUSE)	IAVTVKAL	MEROPS:C01.060	Endopeptidase (input)	-22.45	MEROPS score threshold (-23.76)	79	80.99		Ctsb
YTSSGCVLCAGPEP	A0JNJ4	60	73	N-terminus	Ctsb (P00787; CATB_RAT). CTSB (P07858; CATB_HUMAN). Ctsb (P10605; CATB_MOUSE)	LLDRYTSS	MEROPS:C01.060	Endopeptidase (input)	-22.9	MEROPS score threshold (-23.76)	79	80.99		Ctsb
SASSLGSGAPGP	A0JNJ4	253	264	N-terminus	Ctsb (P00787; CATB_RAT). CTSB (P07858; CATB_HUMAN). Ctsb (P10605; CATB_MOUSE)	SPSSSASS	MEROPS:C01.060	Endopeptidase (input)	-20.66	MEROPS score threshold (-23.76)	79	80.99		Ctsb
SRLATTAFCGSYA	A4FV52	204	216	C-terminus	Ctsb (P00787; CATB_RAT). CTSB (P07858; CATB_HUMAN). Ctsb (P10605; CATB_MOUSE)	GSYAGAVV	MEROPS:C01.060	Endopeptidase (input)	-20.09	MEROPS score threshold (-23.76)	79	80.99		Ctsb
RSAEGQWEAQPALES	A4FV37	214	228	N-terminus	Ctsb (P00787; CATB_RAT). CTSB (P07858; CATB_HUMAN). Ctsb (P10605; CATB_MOUSE)	LGPGRSAE	MEROPS:C01.060	Endopeptidase (input)	-22.78	MEROPS score threshold (-23.76)	79	80.99		Ctsb
PEVFTVEEMMPHIQHLK	A1A4Q2	27	43	C-terminus	Ctsb (P00787; CATB_RAT). CTSB (P07858; CATB_HUMAN). Ctsb (P10605; CATB_MOUSE)	QHLKGAHS	MEROPS:C01.060	Endopeptidase (input)	-23.75	MEROPS score threshold (-23.76)	79	80.99		Ctsb
SLSPGAASSSSGDGDGKEG	A4FV57	133	151	N-terminus	Ctsb (P00787; CATB_RAT). CTSB (P07858; CATB_HUMAN). Ctsb (P10605; CATB_MOUSE)	DETRSLSP	MEROPS:C01.060	Endopeptidase (input)	-23.44	MEROPS score threshold (-23.76)	79	80.99		Ctsb
SGLGDLPIHSLPHAIEDVP	A1A4R9	142	160	N-terminus	Ctsb (P00787; CATB_RAT). CTSB (P07858; CATB_HUMAN). Ctsb (P10605; CATB_MOUSE)	HGLGSGLG	MEROPS:C01.060	Endopeptidase (input)	-19.59	MEROPS score threshold (-23.76)	79	80.99		Ctsb
LVSRSSVSHS	A1L520	309	318	N-terminus	Ctsb (P00787; CATB_RAT). CTSB (P07858; CATB_HUMAN). Ctsb (P10605; CATB_MOUSE)	LGMGLVSR	MEROPS:C01.060	Endopeptidase (input)	-22.1	MEROPS score threshold (-23.76)	79	80.99		Ctsb
LVSRSSVSHS	A1L520	309	318	C-terminus	Ctsb (P00787; CATB_RAT). CTSB (P07858; CATB_HUMAN). Ctsb (P10605; CATB_MOUSE)	VSHSVLSE	MEROPS:C01.060	Endopeptidase (input)	-23.64	MEROPS score threshold (-23.76)	79	80.99		Ctsb
MWRGSSAGGSQGAAME	A1L515	1	16	C-terminus	Ctsb (P00787; CATB_RAT). CTSB (P07858; CATB_HUMAN). Ctsb (P10605; CATB_MOUSE)	AAMEGTGG	MEROPS:C01.060	Endopeptidase (input)	-19.06	MEROPS score threshold (-23.76)	79	80.99		Ctsb
GGLGERVLGFCQLNLPSAK	A2VDL6	543	561	N-terminus	Ctsb (P00787; CATB_RAT). CTSB (P07858; CATB_HUMAN). Ctsb (P10605; CATB_MOUSE)	YLELGGLG	MEROPS:C01.060	Endopeptidase (input)	-22.77	MEROPS score threshold (-23.76)	79	80.99		Ctsb
VFKAGQENISVSKRD	A2VDL6	430	444	C-terminus	Ctsb (P00787; CATB_RAT). CTSB (P07858; CATB_HUMAN). Ctsb (P10605; CATB_MOUSE)	SKRDTAGD	MEROPS:C01.060	Endopeptidase (input)	-23.25	MEROPS score threshold (-23.76)	79	80.99		Ctsb
LQLFSKQNRLTMTRNAV	A2VE08	217	233	N-terminus	Ctsb (P00787; CATB_RAT). CTSB (P07858; CATB_HUMAN). Ctsb (P10605; CATB_MOUSE)	LPPLLQLF	MEROPS:C01.060	Endopeptidase (input)	-23.45	MEROPS score threshold (-23.76)	79	80.99		Ctsb
HSPKSQGSLSPSSNSAFS	A2VE02	728	745	C-terminus	Ctsb (P00787; CATB_RAT). CTSB (P07858; CATB_HUMAN). Ctsb (P10605; CATB_MOUSE)	SAFSGSSW	MEROPS:C01.060	Endopeptidase (input)	-22.77	MEROPS score threshold (-23.76)	79	80.99		Ctsb
ESAHDSPRDETLQ	A5D794	1016	1028	C-terminus	Ctsb (P00787; CATB_RAT). CTSB (P07858; CATB_HUMAN). Ctsb (P10605; CATB_MOUSE)	ETLQNISA	MEROPS:C01.060	Endopeptidase (input)	-22.72	MEROPS score threshold (-23.76)	79	80.99		Ctsb
LNGILLQLISCLQ	A4FV14	300	312	N-terminus	Ctsb (P00787; CATB_RAT). CTSB (P07858; CATB_HUMAN). Ctsb (P10605; CATB_MOUSE)	LGDRLNGI	MEROPS:C01.060	Endopeptidase (input)	-21.03	MEROPS score threshold (-23.76)	79	80.99		Ctsb
VAPGPGLAPPAQPGAP	A2VE44	350	365	N-terminus	Ctsb (P00787; CATB_RAT). CTSB (P07858; CATB_HUMAN). Ctsb (P10605; CATB_MOUSE)	LVSTVAPG	MEROPS:C01.060	Endopeptidase (input)	-20.17	MEROPS score threshold (-23.76)	79	80.99		Ctsb
VAPGPGLAPPAQPGAP	A2VE44	350	365	C-terminus	Ctsb (P00787; CATB_RAT). CTSB (P07858; CATB_HUMAN). Ctsb (P10605; CATB_MOUSE)	PGAPSMAG	MEROPS:C01.060	Endopeptidase (input)	-23.65	MEROPS score threshold (-23.76)	79	80.99		Ctsb
LYSSKKKIFMGL	A2VE44	514	525	N-terminus	Ctsb (P00787; CATB_RAT). CTSB (P07858; CATB_HUMAN). Ctsb (P10605; CATB_MOUSE)	VLMLLYSS	MEROPS:C01.060	Endopeptidase (input)	-23.06	MEROPS score threshold (-23.76)	79	80.99		Ctsb
LPERASGGPEAADFSDR	A0JN53	1013	1029	C-terminus	Ctsb (P00787; CATB_RAT). CTSB (P07858; CATB_HUMAN). Ctsb (P10605; CATB_MOUSE)	FSDRLSLG	MEROPS:C01.060	Endopeptidase (input)	-22.98	MEROPS score threshold (-23.76)	79	80.99		Ctsb
VLLSGVIAFMVNLS	A4IFK2	227	240	N-terminus	Ctsb (P00787; CATB_RAT). CTSB (P07858; CATB_HUMAN). Ctsb (P10605; CATB_MOUSE)	ALLMVLLS	MEROPS:C01.060	Endopeptidase (input)	-21.03	MEROPS score threshold (-23.76)	79	80.99		Ctsb
TGGYMVMGDSFNTS	A2VDL8	367	380	N-terminus	Ctsb (P00787; CATB_RAT). CTSB (P07858; CATB_HUMAN). Ctsb (P10605; CATB_MOUSE)	CPNLTGGY	MEROPS:C01.060	Endopeptidase (input)	-23.64	MEROPS score threshold (-23.76)	79	80.99		Ctsb
AILNVGAPAAG	A1A4J1	403	413	N-terminus	Ctsb (P00787; CATB_RAT). CTSB (P07858; CATB_HUMAN). Ctsb (P10605; CATB_MOUSE)	NFSLAILN	MEROPS:C01.060	Endopeptidase (input)	-23.57	MEROPS score threshold (-23.76)	79	80.99		Ctsb
AILNVGAPAAG	A1A4J1	403	413	C-terminus	Ctsb (P00787; CATB_RAT). CTSB (P07858; CATB_HUMAN). Ctsb (P10605; CATB_MOUSE)	PAAGMNAA	MEROPS:C01.060	Endopeptidase (input)	-20.41	MEROPS score threshold (-23.76)	79	80.99		Ctsb
GDRTSTFCGTPEFLAPE	A1A4I4	771	787	C-terminus	Ctsb (P00787; CATB_RAT). CTSB (P07858; CATB_HUMAN). Ctsb (P10605; CATB_MOUSE)	LAPEVLTD	MEROPS:C01.060	Endopeptidase (input)	-23.49	MEROPS score threshold (-23.76)	79	80.99		Ctsb
QRSLVLFSVGVVLAL	A0JNC3	85	99	C-terminus	Ctsb (P00787; CATB_RAT). CTSB (P07858; CATB_HUMAN). Ctsb (P10605; CATB_MOUSE)	VLALVLNL	MEROPS:C01.060	Endopeptidase (input)	-21.11	MEROPS score threshold (-23.76)	79	80.99		Ctsb
EHVFRHAAQELFG	A4FV58	321	333	C-terminus	Ctsb (P00787; CATB_RAT). CTSB (P07858; CATB_HUMAN). Ctsb (P10605; CATB_MOUSE)	ELFGIHVT	MEROPS:C01.060	Endopeptidase (input)	-21.92	MEROPS score threshold (-23.76)	79	80.99		Ctsb
TGLSAAAPVLRR	A6H773	52	63	N-terminus	Ctsb (P00787; CATB_RAT). CTSB (P07858; CATB_HUMAN). Ctsb (P10605; CATB_MOUSE)	RVGGTGLS	MEROPS:C01.060	Endopeptidase (input)	-23.52	MEROPS score threshold (-23.76)	79	80.99		Ctsb
YQAHSFVSAF	A5PJL1	100	109	C-terminus	Ctsb (P00787; CATB_RAT). CTSB (P07858; CATB_HUMAN). Ctsb (P10605; CATB_MOUSE)	VSAFIGGL	MEROPS:C01.060	Endopeptidase (input)	-20.74	MEROPS score threshold (-23.76)	79	80.99		Ctsb
MPEPGPRMNGFS	A5PKD9	1	12	C-terminus	Ctsb (P00787; CATB_RAT). CTSB (P07858; CATB_HUMAN). Ctsb (P10605; CATB_MOUSE)	NGFSLGEL	MEROPS:C01.060	Endopeptidase (input)	-21.98	MEROPS score threshold (-23.76)	79	80.99		Ctsb
LGSLTHSRREALEKT	A5D7D1	505	519	N-terminus	Ctsb (P00787; CATB_RAT). CTSB (P07858; CATB_HUMAN). Ctsb (P10605; CATB_MOUSE)	QWDALGSL	MEROPS:C01.060	Endopeptidase (input)	-23.63	MEROPS score threshold (-23.76)	79	80.99		Ctsb
SGGGPAPGSPESPWTQLEP	A6QP24	51	69	N-terminus	Ctsb (P00787; CATB_RAT). CTSB (P07858; CATB_HUMAN). Ctsb (P10605; CATB_MOUSE)	QLEISGGG	MEROPS:C01.060	Endopeptidase (input)	-23.12	MEROPS score threshold (-23.76)	79	80.99		Ctsb
VSLTEHFLKFASVFQP	A7E369	99	114	N-terminus	Ctsb (P00787; CATB_RAT). CTSB (P07858; CATB_HUMAN). Ctsb (P10605; CATB_MOUSE)	IQISVSLT	MEROPS:C01.060	Endopeptidase (input)	-23.48	MEROPS score threshold (-23.76)	79	80.99		Ctsb
AAAEAASSSMTKGKE	A6QP11	108	122	N-terminus	Ctsb (P00787; CATB_RAT). CTSB (P07858; CATB_HUMAN). Ctsb (P10605; CATB_MOUSE)	SESGAAAE	MEROPS:C01.060	Endopeptidase (input)	-20.34	MEROPS score threshold (-23.76)	79	80.99		Ctsb
GNGVQTGAEARG	A5D7P8	151	162	N-terminus	Ctsb (P00787; CATB_RAT). CTSB (P07858; CATB_HUMAN). Ctsb (P10605; CATB_MOUSE)	FGPMGNGV	MEROPS:C01.060	Endopeptidase (input)	-21.7	MEROPS score threshold (-23.76)	79	80.99		Ctsb
SRSTSTGSAASSGSNSS	A5D992	112	128	N-terminus	Ctsb (P00787; CATB_RAT). CTSB (P07858; CATB_HUMAN). Ctsb (P10605; CATB_MOUSE)	GPILSRST	MEROPS:C01.060	Endopeptidase (input)	-23.73	MEROPS score threshold (-23.76)	79	80.99		Ctsb
SRSTSTGSAASSGSNSS	A5D992	112	128	C-terminus	Ctsb (P00787; CATB_RAT). CTSB (P07858; CATB_HUMAN). Ctsb (P10605; CATB_MOUSE)	SNSSASSE	MEROPS:C01.060	Endopeptidase (input)	-23.16	MEROPS score threshold (-23.76)	79	80.99		Ctsb
AVGAMKELVER	A6QPE1	55	65	N-terminus	Ctsb (P00787; CATB_RAT). CTSB (P07858; CATB_HUMAN). Ctsb (P10605; CATB_MOUSE)	QGVPAVGA	MEROPS:C01.060	Endopeptidase (input)	-20.34	MEROPS score threshold (-23.76)	79	80.99		Ctsb
GPGDSPEGPEAEGPE	A6QQ47	13	27	N-terminus	Ctsb (P00787; CATB_RAT). CTSB (P07858; CATB_HUMAN). Ctsb (P10605; CATB_MOUSE)	GPGSGPGD	MEROPS:C01.060	Endopeptidase (input)	-20.76	MEROPS score threshold (-23.76)	79	80.99		Ctsb
CRDSQPGILPTEHGTLFG	A5PK27	167	184	C-terminus	Ctsb (P00787; CATB_RAT). CTSB (P07858; CATB_HUMAN). Ctsb (P10605; CATB_MOUSE)	TLFGTETD	MEROPS:C01.060	Endopeptidase (input)	-22.49	MEROPS score threshold (-23.76)	79	80.99		Ctsb
PPGISGALATYAAENS	A6QPB3	1228	1243	N-terminus	Ctsb (P00787; CATB_RAT). CTSB (P07858; CATB_HUMAN). Ctsb (P10605; CATB_MOUSE)	GPRGPPGI	MEROPS:C01.060	Endopeptidase (input)	-20.98	MEROPS score threshold (-23.76)	79	80.99		Ctsb
GQVSPPASNMEYMTWDEE	A6QLZ7	68	85	N-terminus	Ctsb (P00787; CATB_RAT). CTSB (P07858; CATB_HUMAN). Ctsb (P10605; CATB_MOUSE)	NKLRGQVS	MEROPS:C01.060	Endopeptidase (input)	-23.49	MEROPS score threshold (-23.76)	79	80.99		Ctsb
AVFANCAGMLVVVF	A5D9A7	197	210	N-terminus	Ctsb (P00787; CATB_RAT). CTSB (P07858; CATB_HUMAN). Ctsb (P10605; CATB_MOUSE)	LPSEAVFA	MEROPS:C01.060	Endopeptidase (input)	-21.05	MEROPS score threshold (-23.76)	79	80.99		Ctsb
AVFANCAGMLVVVF	A5D9A7	197	210	C-terminus	Ctsb (P00787; CATB_RAT). CTSB (P07858; CATB_HUMAN). Ctsb (P10605; CATB_MOUSE)	VVVFGLLV	MEROPS:C01.060	Endopeptidase (input)	-22.15	MEROPS score threshold (-23.76)	79	80.99		Ctsb
RSGESKSSAMSSDGSLA	A6H7H1	1030	1046	C-terminus	Ctsb (P00787; CATB_RAT). CTSB (P07858; CATB_HUMAN). Ctsb (P10605; CATB_MOUSE)	GSLAENGV	MEROPS:C01.060	Endopeptidase (input)	-21.49	MEROPS score threshold (-23.76)	79	80.99		Ctsb
LSAATTFEPLEPVKDTD	A5PJZ5	81	97	N-terminus	Ctsb (P00787; CATB_RAT). CTSB (P07858; CATB_HUMAN). Ctsb (P10605; CATB_MOUSE)	RLESLSAA	MEROPS:C01.060	Endopeptidase (input)	-22.59	MEROPS score threshold (-23.76)	79	80.99		Ctsb
DSGSVPAPGPGQ	A6QLA6	860	871	N-terminus	Ctsb (P00787; CATB_RAT). CTSB (P07858; CATB_HUMAN). Ctsb (P10605; CATB_MOUSE)	ATREDSGS	MEROPS:C01.060	Endopeptidase (input)	-22.8	MEROPS score threshold (-23.76)	79	80.99		Ctsb
DSGSVPAPGPGQ	A6QLA6	860	871	C-terminus	Ctsb (P00787; CATB_RAT). CTSB (P07858; CATB_HUMAN). Ctsb (P10605; CATB_MOUSE)	GPGQGMPV	MEROPS:C01.060	Endopeptidase (input)	-23.25	MEROPS score threshold (-23.76)	79	80.99		Ctsb
GSKGQPVGMA	A6QPF4	32	41	N-terminus	Ctsb (P00787; CATB_RAT). CTSB (P07858; CATB_HUMAN). Ctsb (P10605; CATB_MOUSE)	PVAPGSKG	MEROPS:C01.060	Endopeptidase (input)	-23.57	MEROPS score threshold (-23.76)	79	80.99		Ctsb
GFPSPNQSSRA	A5D7F6	1058	1068	N-terminus	Ctsb (P00787; CATB_RAT). CTSB (P07858; CATB_HUMAN). Ctsb (P10605; CATB_MOUSE)	LAAGGFPS	MEROPS:C01.060	Endopeptidase (input)	-19.36	MEROPS score threshold (-23.76)	79	80.99		Ctsb
GFPSPNQSSRA	A5D7F6	1058	1068	C-terminus	Ctsb (P00787; CATB_RAT). CTSB (P07858; CATB_HUMAN). Ctsb (P10605; CATB_MOUSE)	SSRAFQGT	MEROPS:C01.060	Endopeptidase (input)	-20.86	MEROPS score threshold (-23.76)	79	80.99		Ctsb
KTCKFVSGFMSELSPVRA	A5PJM5	332	349	C-terminus	Ctsb (P00787; CATB_RAT). CTSB (P07858; CATB_HUMAN). Ctsb (P10605; CATB_MOUSE)	PVRAELLG	MEROPS:C01.060	Endopeptidase (input)	-23.52	MEROPS score threshold (-23.76)	79	80.99		Ctsb
HSVFALATHHCASVVS	A7E2Y6	1128	1143	N-terminus	Ctsb (P00787; CATB_RAT). CTSB (P07858; CATB_HUMAN). Ctsb (P10605; CATB_MOUSE)	QAAQHSVF	MEROPS:C01.060	Endopeptidase (input)	-22.11	MEROPS score threshold (-23.76)	79	80.99		Ctsb
HSVFALATHHCASVVS	A7E2Y6	1128	1143	C-terminus	Ctsb (P00787; CATB_RAT). CTSB (P07858; CATB_HUMAN). Ctsb (P10605; CATB_MOUSE)	SVVSNLLG	MEROPS:C01.060	Endopeptidase (input)	-21.93	MEROPS score threshold (-23.76)	79	80.99		Ctsb
SDELADVGGALRGLNLS	A5PJQ2	218	234	N-terminus	Ctsb (P00787; CATB_RAT). CTSB (P07858; CATB_HUMAN). Ctsb (P10605; CATB_MOUSE)	VGALSDEL	MEROPS:C01.060	Endopeptidase (input)	-23.12	MEROPS score threshold (-23.76)	79	80.99		Ctsb
SDELADVGGALRGLNLS	A5PJQ2	218	234	C-terminus	Ctsb (P00787; CATB_RAT). CTSB (P07858; CATB_HUMAN). Ctsb (P10605; CATB_MOUSE)	LNLSLSYD	MEROPS:C01.060	Endopeptidase (input)	-23.66	MEROPS score threshold (-23.76)	79	80.99		Ctsb
PTGGGGGGGSGGTR	A7E305	54	67	N-terminus	Ctsb (P00787; CATB_RAT). CTSB (P07858; CATB_HUMAN). Ctsb (P10605; CATB_MOUSE)	GPNSPTGG	MEROPS:C01.060	Endopeptidase (input)	-21.6	MEROPS score threshold (-23.76)	79	80.99		Ctsb
LNTLKRENSSPRVMQRK	A7E300	820	836	N-terminus	Ctsb (P00787; CATB_RAT). CTSB (P07858; CATB_HUMAN). Ctsb (P10605; CATB_MOUSE)	SLFHLNTL	MEROPS:C01.060	Endopeptidase (input)	-23.15	MEROPS score threshold (-23.76)	79	80.99		Ctsb
RAESPSQGKPGEAGAE	E1BM58	709	724	N-terminus	Ctsb (P00787; CATB_RAT). CTSB (P07858; CATB_HUMAN). Ctsb (P10605; CATB_MOUSE)	PKLGRAES	MEROPS:C01.060	Endopeptidase (input)	-23.38	MEROPS score threshold (-23.76)	79	80.99		Ctsb
RAESPSQGKPGEAGAE	E1BM58	709	724	C-terminus	Ctsb (P00787; CATB_RAT). CTSB (P07858; CATB_HUMAN). Ctsb (P10605; CATB_MOUSE)	AGAEVSGK	MEROPS:C01.060	Endopeptidase (input)	-19.48	MEROPS score threshold (-23.76)	79	80.99		Ctsb
GAEGPSDQSAGAERTFHL	E1BM58	1147	1164	N-terminus	Ctsb (P00787; CATB_RAT). CTSB (P07858; CATB_HUMAN). Ctsb (P10605; CATB_MOUSE)	RAGAGAEG	MEROPS:C01.060	Endopeptidase (input)	-21.91	MEROPS score threshold (-23.76)	79	80.99		Ctsb
GAEGPSDQSAGAERTFHL	E1BM58	1147	1164	C-terminus	Ctsb (P00787; CATB_RAT). CTSB (P07858; CATB_HUMAN). Ctsb (P10605; CATB_MOUSE)	TFHLSLPD	MEROPS:C01.060	Endopeptidase (input)	-23.14	MEROPS score threshold (-23.76)	79	80.99		Ctsb
SYAGGTGSAGGAATVAFA	A7YY54	199	216	N-terminus	Ctsb (P00787; CATB_RAT). CTSB (P07858; CATB_HUMAN). Ctsb (P10605; CATB_MOUSE)	ANLSSYAG	MEROPS:C01.060	Endopeptidase (input)	-22.51	MEROPS score threshold (-23.76)	79	80.99		Ctsb
SYAGGTGSAGGAATVAFA	A7YY54	199	216	C-terminus	Ctsb (P00787; CATB_RAT). CTSB (P07858; CATB_HUMAN). Ctsb (P10605; CATB_MOUSE)	VAFAAEPV	MEROPS:C01.060	Endopeptidase (input)	-21.72	MEROPS score threshold (-23.76)	79	80.99		Ctsb
VTQSHWPSEPSEAV	O18738	26	39	N-terminus	Ctsb (P00787; CATB_RAT). CTSB (P07858; CATB_HUMAN). Ctsb (P10605; CATB_MOUSE)	LSVAVTQS	MEROPS:C01.060	Endopeptidase (input)	-21.43	MEROPS score threshold (-23.76)	79	80.99		Ctsb
MGLTGTMGMGMP	A7Z035	608	619	N-terminus	Ctsb (P00787; CATB_RAT). CTSB (P07858; CATB_HUMAN). Ctsb (P10605; CATB_MOUSE)	STTGMGLT	MEROPS:C01.060	Endopeptidase (input)	-23.49	MEROPS score threshold (-23.76)	79	80.99		Ctsb
LVRGDAAGSAG	A7MB34	193	203	N-terminus	Ctsb (P00787; CATB_RAT). CTSB (P07858; CATB_HUMAN). Ctsb (P10605; CATB_MOUSE)	PAAGLVRG	MEROPS:C01.060	Endopeptidase (input)	-19.11	MEROPS score threshold (-23.76)	79	80.99		Ctsb
LVRGDAAGSAG	A7MB34	193	203	C-terminus	Ctsb (P00787; CATB_RAT). CTSB (P07858; CATB_HUMAN). Ctsb (P10605; CATB_MOUSE)	GSAGGPAV	MEROPS:C01.060	Endopeptidase (input)	-19.02	MEROPS score threshold (-23.76)	79	80.99		Ctsb
SGAPPASGHSHRP	A7YWM1	88	100	N-terminus	Ctsb (P00787; CATB_RAT). CTSB (P07858; CATB_HUMAN). Ctsb (P10605; CATB_MOUSE)	GALGSGAP	MEROPS:C01.060	Endopeptidase (input)	-18.06	MEROPS score threshold (-23.76)	79	80.99		Ctsb
EALQGFARSVAAARGPAA	A7YY73	112	129	C-terminus	Ctsb (P00787; CATB_RAT). CTSB (P07858; CATB_HUMAN). Ctsb (P10605; CATB_MOUSE)	GPAALVAP	MEROPS:C01.060	Endopeptidase (input)	-17.62	MEROPS score threshold (-23.76)	79	80.99		Ctsb
LTTSPQGHFVGSDWQ	E1BD59	617	631	N-terminus	Ctsb (P00787; CATB_RAT). CTSB (P07858; CATB_HUMAN). Ctsb (P10605; CATB_MOUSE)	ALVFLTTS	MEROPS:C01.060	Endopeptidase (input)	-21.06	MEROPS score threshold (-23.76)	79	80.99		Ctsb
EFSVDIGRLAQE	A7Z050	1374	1385	C-terminus	Ctsb (P00787; CATB_RAT). CTSB (P07858; CATB_HUMAN). Ctsb (P10605; CATB_MOUSE)	LAQEASAI	MEROPS:C01.060	Endopeptidase (input)	-22.17	MEROPS score threshold (-23.76)	79	80.99		Ctsb
ASLRAAKQADRRIKL	A7YW45	374	388	N-terminus	Ctsb (P00787; CATB_RAT). CTSB (P07858; CATB_HUMAN). Ctsb (P10605; CATB_MOUSE)	PLVNASLR	MEROPS:C01.060	Endopeptidase (input)	-23.19	MEROPS score threshold (-23.76)	79	80.99		Ctsb
AAEGDPEQVQGGAEGSS	F1MLB4	329	345	N-terminus	Ctsb (P00787; CATB_RAT). CTSB (P07858; CATB_HUMAN). Ctsb (P10605; CATB_MOUSE)	GHPRAAEG	MEROPS:C01.060	Endopeptidase (input)	-22.34	MEROPS score threshold (-23.76)	79	80.99		Ctsb
QVPLAHPMQMS	E1BPQ1	532	542	C-terminus	Ctsb (P00787; CATB_RAT). CTSB (P07858; CATB_HUMAN). Ctsb (P10605; CATB_MOUSE)	MQMSALGG	MEROPS:C01.060	Endopeptidase (input)	-21.06	MEROPS score threshold (-23.76)	79	80.99		Ctsb
QWLPRLHALVV	E1BNQ4	122	132	C-terminus	Ctsb (P00787; CATB_RAT). CTSB (P07858; CATB_HUMAN). Ctsb (P10605; CATB_MOUSE)	ALVVGPGL	MEROPS:C01.060	Endopeptidase (input)	-20.74	MEROPS score threshold (-23.76)	79	80.99		Ctsb
KRNAVAFRS	E1BFR5	653	661	C-terminus	Ctsb (P00787; CATB_RAT). CTSB (P07858; CATB_HUMAN). Ctsb (P10605; CATB_MOUSE)	AFRSFNSH	MEROPS:C01.060	Endopeptidase (input)	-23.61	MEROPS score threshold (-23.76)	79	80.99		Ctsb
GTKGMGKETT	E1BP74	310	319	C-terminus	Ctsb (P00787; CATB_RAT). CTSB (P07858; CATB_HUMAN). Ctsb (P10605; CATB_MOUSE)	KETTLLLA	MEROPS:C01.060	Endopeptidase (input)	-23.32	MEROPS score threshold (-23.76)	79	80.99		Ctsb
RSEPPSATPSPALSVESL	E1BBG2	487	504	C-terminus	Ctsb (P00787; CATB_RAT). CTSB (P07858; CATB_HUMAN). Ctsb (P10605; CATB_MOUSE)	VESLSSES	MEROPS:C01.060	Endopeptidase (input)	-22.56	MEROPS score threshold (-23.76)	79	80.99		Ctsb
ETGDDLLVSEVTQSNKE	F1MRW8	439	455	N-terminus	Ctsb (P00787; CATB_RAT). CTSB (P07858; CATB_HUMAN). Ctsb (P10605; CATB_MOUSE)	SLAPETGD	MEROPS:C01.060	Endopeptidase (input)	-23.31	MEROPS score threshold (-23.76)	79	80.99		Ctsb
DAGGQSQEPEVLGRT	A8E4N3	69	83	C-terminus	Ctsb (P00787; CATB_RAT). CTSB (P07858; CATB_HUMAN). Ctsb (P10605; CATB_MOUSE)	LGRTGNLP	MEROPS:C01.060	Endopeptidase (input)	-22.61	MEROPS score threshold (-23.76)	79	80.99		Ctsb
SGPSSGPQMSSGPGGAPLD	A7Z019	137	155	N-terminus	Ctsb (P00787; CATB_RAT). CTSB (P07858; CATB_HUMAN). Ctsb (P10605; CATB_MOUSE)	PVPASGPS	MEROPS:C01.060	Endopeptidase (input)	-21.34	MEROPS score threshold (-23.76)	79	80.99		Ctsb
SGPSSGPQMSSGPGGAPLD	A7Z019	137	155	C-terminus	Ctsb (P00787; CATB_RAT). CTSB (P07858; CATB_HUMAN). Ctsb (P10605; CATB_MOUSE)	APLDGADP	MEROPS:C01.060	Endopeptidase (input)	-21.48	MEROPS score threshold (-23.76)	79	80.99		Ctsb
GPGPSPGAMLGPSPGP	A7Z019	19	34	N-terminus	Ctsb (P00787; CATB_RAT). CTSB (P07858; CATB_HUMAN). Ctsb (P10605; CATB_MOUSE)	GPSPGPGP	MEROPS:C01.060	Endopeptidase (input)	-21.52	MEROPS score threshold (-23.76)	79	80.99		Ctsb
GTAAPLRPGMPPTMMDPF	E1BJD1	98	115	N-terminus	Ctsb (P00787; CATB_RAT). CTSB (P07858; CATB_HUMAN). Ctsb (P10605; CATB_MOUSE)	GSPFGTAA	MEROPS:C01.060	Endopeptidase (input)	-21.88	MEROPS score threshold (-23.76)	79	80.99		Ctsb
ALLPEPLKPQAALPVPPS	O18964	1220	1237	C-terminus	Ctsb (P00787; CATB_RAT). CTSB (P07858; CATB_HUMAN). Ctsb (P10605; CATB_MOUSE)	VPPSLAPP	MEROPS:C01.060	Endopeptidase (input)	-21.49	MEROPS score threshold (-23.76)	79	80.99		Ctsb
NGPGSRSKVPSGTNNHSL	A8E653	79	96	N-terminus	Ctsb (P00787; CATB_RAT). CTSB (P07858; CATB_HUMAN). Ctsb (P10605; CATB_MOUSE)	ACGGNGPG	MEROPS:C01.060	Endopeptidase (input)	-22.86	MEROPS score threshold (-23.76)	79	80.99		Ctsb
AAPASTHTTAT	F1MCY2	248	258	C-terminus	Ctsb (P00787; CATB_RAT). CTSB (P07858; CATB_HUMAN). Ctsb (P10605; CATB_MOUSE)	TTATLSLT	MEROPS:C01.060	Endopeptidase (input)	-22.11	MEROPS score threshold (-23.76)	79	80.99		Ctsb
MYPPHPLTAQYGVKVLRS	O02811	1627	1644	C-terminus	Ctsb (P00787; CATB_RAT). CTSB (P07858; CATB_HUMAN). Ctsb (P10605; CATB_MOUSE)	VLRSFPPD	MEROPS:C01.060	Endopeptidase (input)	-22.8	MEROPS score threshold (-23.76)	79	80.99		Ctsb
AAEKKDSGPYKM	P01190	210	221	N-terminus	Ctsb (P00787; CATB_RAT). CTSB (P07858; CATB_HUMAN). Ctsb (P10605; CATB_MOUSE)	AEAEAAEK	MEROPS:C01.060	Endopeptidase (input)	-22.73	MEROPS score threshold (-23.76)	79	80.99		Ctsb
FCLLGPEGTPASWSLMD	O77512	206	222	C-terminus	Ctsb (P00787; CATB_RAT). CTSB (P07858; CATB_HUMAN). Ctsb (P10605; CATB_MOUSE)	SLMDQTGE	MEROPS:C01.060	Endopeptidase (input)	-23.61	MEROPS score threshold (-23.76)	79	80.99		Ctsb
NSGGGGAAGGGPGERKRT	O46606	129	146	N-terminus	Ctsb (P00787; CATB_RAT). CTSB (P07858; CATB_HUMAN). Ctsb (P10605; CATB_MOUSE)	LVPSNSGG	MEROPS:C01.060	Endopeptidase (input)	-20.83	MEROPS score threshold (-23.76)	79	80.99		Ctsb
LTSAPVPSTTTRSLTACP	P08037	118	135	N-terminus	Ctsb (P00787; CATB_RAT). CTSB (P07858; CATB_HUMAN). Ctsb (P10605; CATB_MOUSE)	PGSNLTSA	MEROPS:C01.060	Endopeptidase (input)	-21.05	MEROPS score threshold (-23.76)	79	80.99		Ctsb
GVPGVGVPGVGVPGVG	P04985	338	353	N-terminus	Ctsb (P00787; CATB_RAT). CTSB (P07858; CATB_HUMAN). Ctsb (P10605; CATB_MOUSE)	LPGVGVPG	MEROPS:C01.060	Endopeptidase (input)	-22.74	MEROPS score threshold (-23.76)	79	80.99		Ctsb
GVPGVGVPGVGVPGVG	P04985	338	353	C-terminus	Ctsb (P00787; CATB_RAT). CTSB (P07858; CATB_HUMAN). Ctsb (P10605; CATB_MOUSE)	PGVGVPGV	MEROPS:C01.060	Endopeptidase (input)	-18.28	MEROPS score threshold (-23.76)	79	80.99		Ctsb
GLPGVGVPGVGVPGVGVPG	P04985	333	351	N-terminus	Ctsb (P00787; CATB_RAT). CTSB (P07858; CATB_HUMAN). Ctsb (P10605; CATB_MOUSE)	GAAGGLPG	MEROPS:C01.060	Endopeptidase (input)	-16.86	MEROPS score threshold (-23.76)	79	80.99		Ctsb
GLPGVGVPGVGVPGVGVPG	P04985	333	351	C-terminus	Ctsb (P00787; CATB_RAT). CTSB (P07858; CATB_HUMAN). Ctsb (P10605; CATB_MOUSE)	GVPGVGVP	MEROPS:C01.060	Endopeptidase (input)	-20.4	MEROPS score threshold (-23.76)	79	80.99		Ctsb
DPASGEGVPPG	P01267	1128	1138	C-terminus	Ctsb (P00787; CATB_RAT). CTSB (P07858; CATB_HUMAN). Ctsb (P10605; CATB_MOUSE)	VPPGTNSS	MEROPS:C01.060	Endopeptidase (input)	-22.08	MEROPS score threshold (-23.76)	79	80.99		Ctsb
YRIIATTEG	P10861	163	171	C-terminus	Ctsb (P00787; CATB_RAT). CTSB (P07858; CATB_HUMAN). Ctsb (P10605; CATB_MOUSE)	TTEGLTGL	MEROPS:C01.060	Endopeptidase (input)	-21.02	MEROPS score threshold (-23.76)	79	80.99		Ctsb
GFPPLPPPPPQLPT	P09851	129	142	N-terminus	Ctsb (P00787; CATB_RAT). CTSB (P07858; CATB_HUMAN). Ctsb (P10605; CATB_MOUSE)	GAGGGFPP	MEROPS:C01.060	Endopeptidase (input)	-20.95	MEROPS score threshold (-23.76)	79	80.99		Ctsb
GFPPLPPPPPQLPT	P09851	129	142	C-terminus	Ctsb (P00787; CATB_RAT). CTSB (P07858; CATB_HUMAN). Ctsb (P10605; CATB_MOUSE)	QLPTLGAG	MEROPS:C01.060	Endopeptidase (input)	-19.69	MEROPS score threshold (-23.76)	79	80.99		Ctsb
AAAAAGAGGEMAFAKG	P09851	100	115	N-terminus	Ctsb (P00787; CATB_RAT). CTSB (P07858; CATB_HUMAN). Ctsb (P10605; CATB_MOUSE)	VAGVAAAA	MEROPS:C01.060	Endopeptidase (input)	-23.17	MEROPS score threshold (-23.76)	79	80.99		Ctsb
AAAAAGAGGEMAFAKG	P09851	100	115	C-terminus	Ctsb (P00787; CATB_RAT). CTSB (P07858; CATB_HUMAN). Ctsb (P10605; CATB_MOUSE)	FAKGTTSL	MEROPS:C01.060	Endopeptidase (input)	-23.6	MEROPS score threshold (-23.76)	79	80.99		Ctsb
LSAGGAAAGVAGVAAA	P09851	87	102	N-terminus	Ctsb (P00787; CATB_RAT). CTSB (P07858; CATB_HUMAN). Ctsb (P10605; CATB_MOUSE)	GGVGLSAG	MEROPS:C01.060	Endopeptidase (input)	-16.57	MEROPS score threshold (-23.76)	79	80.99		Ctsb
LSAGGAAAGVAGVAAA	P09851	87	102	C-terminus	Ctsb (P00787; CATB_RAT). CTSB (P07858; CATB_HUMAN). Ctsb (P10605; CATB_MOUSE)	VAAAAAGA	MEROPS:C01.060	Endopeptidase (input)	-16.69	MEROPS score threshold (-23.76)	79	80.99		Ctsb
WAGAVITGFRNKTKASLAH	P00847	109	127	N-terminus	Ctsb (P00787; CATB_RAT). CTSB (P07858; CATB_HUMAN). Ctsb (P10605; CATB_MOUSE)	AIPLWAGA	MEROPS:C01.060	Endopeptidase (input)	-21.71	MEROPS score threshold (-23.76)	79	80.99		Ctsb
WAGAVITGFRNKTKASLAH	P00847	109	127	C-terminus	Ctsb (P00787; CATB_RAT). CTSB (P07858; CATB_HUMAN). Ctsb (P10605; CATB_MOUSE)	SLAHFLPQ	MEROPS:C01.060	Endopeptidase (input)	-21.38	MEROPS score threshold (-23.76)	79	80.99		Ctsb
SGGYGGGSSSGGGHGGSS	P06394	468	485	N-terminus	Ctsb (P00787; CATB_RAT). CTSB (P07858; CATB_HUMAN). Ctsb (P10605; CATB_MOUSE)	GGSSSGGY	MEROPS:C01.060	Endopeptidase (input)	-19.24	MEROPS score threshold (-23.76)	79	80.99		Ctsb
SGGYGGGSSSGGGHGGSS	P06394	468	485	C-terminus	Ctsb (P00787; CATB_RAT). CTSB (P07858; CATB_HUMAN). Ctsb (P10605; CATB_MOUSE)	GGSSGGSY	MEROPS:C01.060	Endopeptidase (input)	-20.75	MEROPS score threshold (-23.76)	79	80.99		Ctsb
QSSSTSSFGGMGGGSMRFG	P08728	8	26	C-terminus	Ctsb (P00787; CATB_RAT). CTSB (P07858; CATB_HUMAN). Ctsb (P10605; CATB_MOUSE)	MRFGAGGA	MEROPS:C01.060	Endopeptidase (input)	-18.78	MEROPS score threshold (-23.76)	79	80.99		Ctsb
LREARSRASTPPAAP	P00515	40	54	C-terminus	Ctsb (P00787; CATB_RAT). CTSB (P07858; CATB_HUMAN). Ctsb (P10605; CATB_MOUSE)	PAAPPSGS	MEROPS:C01.060	Endopeptidase (input)	-22.81	MEROPS score threshold (-23.76)	79	80.99		Ctsb
EKGAPGADGPAGAPGTP	P02453	932	948	N-terminus	Ctsb (P00787; CATB_RAT). CTSB (P07858; CATB_HUMAN). Ctsb (P10605; CATB_MOUSE)	GPAGEKGA	MEROPS:C01.060	Endopeptidase (input)	-20.1	MEROPS score threshold (-23.76)	79	80.99		Ctsb
DTGAKGEPGPTGIQGPP	P02453	443	459	N-terminus	Ctsb (P00787; CATB_RAT). CTSB (P07858; CATB_HUMAN). Ctsb (P10605; CATB_MOUSE)	GSKGDTGA	MEROPS:C01.060	Endopeptidase (input)	-21.47	MEROPS score threshold (-23.76)	79	80.99		Ctsb
PAGPIGPVGARGPAGPQG	P02453	1073	1090	N-terminus	Ctsb (P00787; CATB_RAT). CTSB (P07858; CATB_HUMAN). Ctsb (P10605; CATB_MOUSE)	GPAGPAGP	MEROPS:C01.060	Endopeptidase (input)	-17.8	MEROPS score threshold (-23.76)	79	80.99		Ctsb
PAGPIGPVGARGPAGPQG	P02453	1073	1090	C-terminus	Ctsb (P00787; CATB_RAT). CTSB (P07858; CATB_HUMAN). Ctsb (P10605; CATB_MOUSE)	GPQGPRGD	MEROPS:C01.060	Endopeptidase (input)	-23.39	MEROPS score threshold (-23.76)	79	80.99		Ctsb
PVGPTGPVGAAG	P02465	750	761	N-terminus	Ctsb (P00787; CATB_RAT). CTSB (P07858; CATB_HUMAN). Ctsb (P10605; CATB_MOUSE)	GENGPVGP	MEROPS:C01.060	Endopeptidase (input)	-21.45	MEROPS score threshold (-23.76)	79	80.99		Ctsb
PVGPTGPVGAAG	P02465	750	761	C-terminus	Ctsb (P00787; CATB_RAT). CTSB (P07858; CATB_HUMAN). Ctsb (P10605; CATB_MOUSE)	GAAGPSGP	MEROPS:C01.060	Endopeptidase (input)	-18.27	MEROPS score threshold (-23.76)	79	80.99		Ctsb
HPGKPGRPGERGVVGPQG	P02465	144	161	N-terminus	Ctsb (P00787; CATB_RAT). CTSB (P07858; CATB_HUMAN). Ctsb (P10605; CATB_MOUSE)	GEDGHPGK	MEROPS:C01.060	Endopeptidase (input)	-23.13	MEROPS score threshold (-23.76)	79	80.99		Ctsb
HPGKPGRPGERGVVGPQG	P02465	144	161	C-terminus	Ctsb (P00787; CATB_RAT). CTSB (P07858; CATB_HUMAN). Ctsb (P10605; CATB_MOUSE)	GPQGARGF	MEROPS:C01.060	Endopeptidase (input)	-21.36	MEROPS score threshold (-23.76)	79	80.99		Ctsb
PLGIAGLTGARGLAGPPGM	P04258	790	808	N-terminus	Ctsb (P00787; CATB_RAT). CTSB (P07858; CATB_HUMAN). Ctsb (P10605; CATB_MOUSE)	GAPGPLGI	MEROPS:C01.060	Endopeptidase (input)	-20.14	MEROPS score threshold (-23.76)	79	80.99		Ctsb
NPGPPGSSGAPGKD	P04258	733	746	N-terminus	Ctsb (P00787; CATB_RAT). CTSB (P07858; CATB_HUMAN). Ctsb (P10605; CATB_MOUSE)	GSNGNPGP	MEROPS:C01.060	Endopeptidase (input)	-21.47	MEROPS score threshold (-23.76)	79	80.99		Ctsb
KNGDQHPSAT	P10895	738	747	N-terminus	Ctsb (P00787; CATB_RAT). CTSB (P07858; CATB_HUMAN). Ctsb (P10605; CATB_MOUSE)	HLLSKNGD	MEROPS:C01.060	Endopeptidase (input)	-23.46	MEROPS score threshold (-23.76)	79	80.99		Ctsb
KNGDQHPSAT	P10895	738	747	C-terminus	Ctsb (P00787; CATB_RAT). CTSB (P07858; CATB_HUMAN). Ctsb (P10605; CATB_MOUSE)	PSATLFVK	MEROPS:C01.060	Endopeptidase (input)	-22.78	MEROPS score threshold (-23.76)	79	80.99		Ctsb
SSIFECKPQRVHKL	O97790	91	104	N-terminus	Ctsb (P00787; CATB_RAT). CTSB (P07858; CATB_HUMAN). Ctsb (P10605; CATB_MOUSE)	PLICSSIF	MEROPS:C01.060	Endopeptidase (input)	-23.19	MEROPS score threshold (-23.76)	79	80.99		Ctsb
APAPSTRRPPAPNLHV	O97831	459	474	N-terminus	Ctsb (P00787; CATB_RAT). CTSB (P07858; CATB_HUMAN). Ctsb (P10605; CATB_MOUSE)	PPATAPAP	MEROPS:C01.060	Endopeptidase (input)	-20.71	MEROPS score threshold (-23.76)	79	80.99		Ctsb
FNFLMVLGKGSFGKVMLSE	P05126	342	360	C-terminus	Ctsb (P00787; CATB_RAT). CTSB (P07858; CATB_HUMAN). Ctsb (P10605; CATB_MOUSE)	MLSERKGT	MEROPS:C01.060	Endopeptidase (input)	-23.65	MEROPS score threshold (-23.76)	79	80.99		Ctsb
GFGLSPIFPGGAGGLG	P04985-4	714	729	N-terminus	Ctsb (P00787; CATB_RAT). CTSB (P07858; CATB_HUMAN). Ctsb (P10605; CATB_MOUSE)	AARPGFGL	MEROPS:C01.060	Endopeptidase (input)	-23.09	MEROPS score threshold (-23.76)	79	80.99		Ctsb
GFGLSPIFPGGAGGLG	P04985-4	714	729	C-terminus	Ctsb (P00787; CATB_RAT). CTSB (P07858; CATB_HUMAN). Ctsb (P10605; CATB_MOUSE)	GGLGVGGK	MEROPS:C01.060	Endopeptidase (input)	-17.71	MEROPS score threshold (-23.76)	79	80.99		Ctsb
AMGYGSYMIWKE	P30535	59	70	N-terminus	Ctsb (P00787; CATB_RAT). CTSB (P07858; CATB_HUMAN). Ctsb (P10605; CATB_MOUSE)	TLYSAMGY	MEROPS:C01.060	Endopeptidase (input)	-22.94	MEROPS score threshold (-23.76)	79	80.99		Ctsb
AMGYGSYMIWKE	P30535	59	70	C-terminus	Ctsb (P00787; CATB_RAT). CTSB (P07858; CATB_HUMAN). Ctsb (P10605; CATB_MOUSE)	IWKELGGF	MEROPS:C01.060	Endopeptidase (input)	-23.42	MEROPS score threshold (-23.76)	79	80.99		Ctsb
ATSHDSQITQEAVPKS	P38574	243	258	N-terminus	Ctsb (P00787; CATB_RAT). CTSB (P07858; CATB_HUMAN). Ctsb (P10605; CATB_MOUSE)	DADGATSH	MEROPS:C01.060	Endopeptidase (input)	-22.59	MEROPS score threshold (-23.76)	79	80.99		Ctsb
ATSHDSQITQEAVPKS	P38574	243	258	C-terminus	Ctsb (P00787; CATB_RAT). CTSB (P07858; CATB_HUMAN). Ctsb (P10605; CATB_MOUSE)	VPKSLGTS	MEROPS:C01.060	Endopeptidase (input)	-23.28	MEROPS score threshold (-23.76)	79	80.99		Ctsb
RSGSIIDQTRVLNLGPITR	P48733	590	608	C-terminus	Ctsb (P00787; CATB_RAT). CTSB (P07858; CATB_HUMAN). Ctsb (P10605; CATB_MOUSE)	PITRKGGQ	MEROPS:C01.060	Endopeptidase (input)	-23.41	MEROPS score threshold (-23.76)	79	80.99		Ctsb
RSGSIIDQTRVLN	P48733	590	602	C-terminus	Ctsb (P00787; CATB_RAT). CTSB (P07858; CATB_HUMAN). Ctsb (P10605; CATB_MOUSE)	RVLNLGPI	MEROPS:C01.060	Endopeptidase (input)	-22.92	MEROPS score threshold (-23.76)	79	80.99		Ctsb
RGSLESTLAHGLKNGMK	P17810	123	139	N-terminus	Ctsb (P00787; CATB_RAT). CTSB (P07858; CATB_HUMAN). Ctsb (P10605; CATB_MOUSE)	FLLRGSLE	MEROPS:C01.060	Endopeptidase (input)	-21.62	MEROPS score threshold (-23.76)	79	80.99		Ctsb
LPGGFPGGAMPSQYPGGQS	P20072	119	137	N-terminus	Ctsb (P00787; CATB_RAT). CTSB (P07858; CATB_HUMAN). Ctsb (P10605; CATB_MOUSE)	AQVPLPGG	MEROPS:C01.060	Endopeptidase (input)	-21.77	MEROPS score threshold (-23.76)	79	80.99		Ctsb
TGSSFCAGSNNQVHLWL	P27479	10	26	N-terminus	Ctsb (P00787; CATB_RAT). CTSB (P07858; CATB_HUMAN). Ctsb (P10605; CATB_MOUSE)	VRVSTGSS	MEROPS:C01.060	Endopeptidase (input)	-22.63	MEROPS score threshold (-23.76)	79	80.99		Ctsb
GSLDDEPGGEAETKMLS	P43896	282	298	N-terminus	Ctsb (P00787; CATB_RAT). CTSB (P07858; CATB_HUMAN). Ctsb (P10605; CATB_MOUSE)	PLSVGSLD	MEROPS:C01.060	Endopeptidase (input)	-22.67	MEROPS score threshold (-23.76)	79	80.99		Ctsb
SVVVGPSVVAV	P12763	290	300	N-terminus	Ctsb (P00787; CATB_RAT). CTSB (P07858; CATB_HUMAN). Ctsb (P10605; CATB_MOUSE)	PPVASVVV	MEROPS:C01.060	Endopeptidase (input)	-19.47	MEROPS score threshold (-23.76)	79	80.99		Ctsb
LVLLLVQVQPSLGKESA	P39873	14	30	N-terminus	Ctsb (P00787; CATB_RAT). CTSB (P07858; CATB_HUMAN). Ctsb (P10605; CATB_MOUSE)	SLLVLVLL	MEROPS:C01.060	Endopeptidase (input)	-22.74	MEROPS score threshold (-23.76)	79	80.99		Ctsb
LVLLLVQVQPSLGKESA	P39873	14	30	C-terminus	Ctsb (P00787; CATB_RAT). CTSB (P07858; CATB_HUMAN). Ctsb (P10605; CATB_MOUSE)	KESAAAKF	MEROPS:C01.060	Endopeptidase (input)	-23.75	MEROPS score threshold (-23.76)	79	80.99		Ctsb
VMRPEMIMKSIIPVV	P23956	46	60	C-terminus	Ctsb (P00787; CATB_RAT). CTSB (P07858; CATB_HUMAN). Ctsb (P10605; CATB_MOUSE)	IPVVMAGI	MEROPS:C01.060	Endopeptidase (input)	-21.81	MEROPS score threshold (-23.76)	79	80.99		Ctsb
SGTGIAAMSVMR	P23956	37	48	N-terminus	Ctsb (P00787; CATB_RAT). CTSB (P07858; CATB_HUMAN). Ctsb (P10605; CATB_MOUSE)	GTAKSGTG	MEROPS:C01.060	Endopeptidase (input)	-21.85	MEROPS score threshold (-23.76)	79	80.99		Ctsb
LGLLSGPRSAH	P30404	12	22	N-terminus	Ctsb (P00787; CATB_RAT). CTSB (P07858; CATB_HUMAN). Ctsb (P10605; CATB_MOUSE)	GPRLLGLL	MEROPS:C01.060	Endopeptidase (input)	-21.38	MEROPS score threshold (-23.76)	79	80.99		Ctsb
GLPVGAGPGALQGSGL	P19754	1101	1116	N-terminus	Ctsb (P00787; CATB_RAT). CTSB (P07858; CATB_HUMAN). Ctsb (P10605; CATB_MOUSE)	PPAAGLPV	MEROPS:C01.060	Endopeptidase (input)	-19.03	MEROPS score threshold (-23.76)	79	80.99		Ctsb
GLPVGAGPGALQGSGL	P19754	1101	1116	C-terminus	Ctsb (P00787; CATB_RAT). CTSB (P07858; CATB_HUMAN). Ctsb (P10605; CATB_MOUSE)	GSGLAPGP	MEROPS:C01.060	Endopeptidase (input)	-21.39	MEROPS score threshold (-23.76)	79	80.99		Ctsb
NSSVSPFGKLVVYST	P43481	464	478	N-terminus	Ctsb (P00787; CATB_RAT). CTSB (P07858; CATB_HUMAN). Ctsb (P10605; CATB_MOUSE)	VQIQNSSV	MEROPS:C01.060	Endopeptidase (input)	-23.21	MEROPS score threshold (-23.76)	79	80.99		Ctsb
DPPTVELQGLVPRG	P12260	26	39	C-terminus	Ctsb (P00787; CATB_RAT). CTSB (P07858; CATB_HUMAN). Ctsb (P10605; CATB_MOUSE)	VPRGFNPQ	MEROPS:C01.060	Endopeptidase (input)	-21.65	MEROPS score threshold (-23.76)	79	80.99		Ctsb
PALEPPTLPLHHA	P23726	204	216	N-terminus	Ctsb (P00787; CATB_RAT). CTSB (P07858; CATB_HUMAN). Ctsb (P10605; CATB_MOUSE)	GPVGPALE	MEROPS:C01.060	Endopeptidase (input)	-21.15	MEROPS score threshold (-23.76)	79	80.99		Ctsb
PGGMPGGMPGGFPGGGAPP	P19120	618	636	C-terminus	Ctsb (P00787; CATB_RAT). CTSB (P07858; CATB_HUMAN). Ctsb (P10605; CATB_MOUSE)	GAPPSGGA	MEROPS:C01.060	Endopeptidase (input)	-21.44	MEROPS score threshold (-23.76)	79	80.99		Ctsb
MAVRNNLAGAE	P49951	351	361	C-terminus	Ctsb (P00787; CATB_RAT). CTSB (P07858; CATB_HUMAN). Ctsb (P10605; CATB_MOUSE)	AGAEELFA	MEROPS:C01.060	Endopeptidase (input)	-22.94	MEROPS score threshold (-23.76)	79	80.99		Ctsb
LPGPSGNMGPQGPKGIP	P23206	336	352	N-terminus	Ctsb (P00787; CATB_RAT). CTSB (P07858; CATB_HUMAN). Ctsb (P10605; CATB_MOUSE)	GEAGLPGP	MEROPS:C01.060	Endopeptidase (input)	-18.05	MEROPS score threshold (-23.76)	79	80.99		Ctsb
PTGPPGPPGPRGNAGE	P23206	488	503	N-terminus	Ctsb (P00787; CATB_RAT). CTSB (P07858; CATB_HUMAN). Ctsb (P10605; CATB_MOUSE)	GLNGPTGP	MEROPS:C01.060	Endopeptidase (input)	-20.35	MEROPS score threshold (-23.76)	79	80.99		Ctsb
NGPTGPPGPPGPRGNAGEP	P23206	486	504	C-terminus	Ctsb (P00787; CATB_RAT). CTSB (P07858; CATB_HUMAN). Ctsb (P10605; CATB_MOUSE)	AGEPGLPG	MEROPS:C01.060	Endopeptidase (input)	-23.76	MEROPS score threshold (-23.76)	79	80.99		Ctsb
YRAVTYHNWRHGFN	P16586	551	564	C-terminus	Ctsb (P00787; CATB_RAT). CTSB (P07858; CATB_HUMAN). Ctsb (P10605; CATB_MOUSE)	HGFNVGQT	MEROPS:C01.060	Endopeptidase (input)	-23.67	MEROPS score threshold (-23.76)	79	80.99		Ctsb
SFSPGADFFLLKCE	P42659	540	553	N-terminus	Ctsb (P00787; CATB_RAT). CTSB (P07858; CATB_HUMAN). Ctsb (P10605; CATB_MOUSE)	YFSASFSP	MEROPS:C01.060	Endopeptidase (input)	-23.21	MEROPS score threshold (-23.76)	79	80.99		Ctsb
SVLPSGEGHLETSS	P13608	1249	1262	N-terminus	Ctsb (P00787; CATB_RAT). CTSB (P07858; CATB_HUMAN). Ctsb (P10605; CATB_MOUSE)	VEDLSVLP	MEROPS:C01.060	Endopeptidase (input)	-23.67	MEROPS score threshold (-23.76)	79	80.99		Ctsb
SVLPSGEGHLETSS	P13608	1249	1262	C-terminus	Ctsb (P00787; CATB_RAT). CTSB (P07858; CATB_HUMAN). Ctsb (P10605; CATB_MOUSE)	ETSSGVED	MEROPS:C01.060	Endopeptidase (input)	-22.47	MEROPS score threshold (-23.76)	79	80.99		Ctsb
LDLQVISPQPRSIGLIAG	Q08DK1	228	245	C-terminus	Ctsb (P00787; CATB_RAT). CTSB (P07858; CATB_HUMAN). Ctsb (P10605; CATB_MOUSE)	LIAGAIGT	MEROPS:C01.060	Endopeptidase (input)	-17.76	MEROPS score threshold (-23.76)	79	80.99		Ctsb
HYSAAQGGSQHYQGQS	Q08E31	203	218	N-terminus	Ctsb (P00787; CATB_RAT). CTSB (P07858; CATB_HUMAN). Ctsb (P10605; CATB_MOUSE)	AASSHYSA	MEROPS:C01.060	Endopeptidase (input)	-23.67	MEROPS score threshold (-23.76)	79	80.99		Ctsb
TPDAGLWSPSPGRR	P55106	334	347	N-terminus	Ctsb (P00787; CATB_RAT). CTSB (P07858; CATB_HUMAN). Ctsb (P10605; CATB_MOUSE)	PPSGTPDA	MEROPS:C01.060	Endopeptidase (input)	-21.83	MEROPS score threshold (-23.76)	79	80.99		Ctsb
ASAAKSPLLNSPT	Q08DG7	138	150	N-terminus	Ctsb (P00787; CATB_RAT). CTSB (P07858; CATB_HUMAN). Ctsb (P10605; CATB_MOUSE)	NPTPASAA	MEROPS:C01.060	Endopeptidase (input)	-23.7	MEROPS score threshold (-23.76)	79	80.99		Ctsb
PSAAPTESPDPAEDV	P52176	506	520	N-terminus	Ctsb (P00787; CATB_RAT). CTSB (P07858; CATB_HUMAN). Ctsb (P10605; CATB_MOUSE)	PTAGPSAA	MEROPS:C01.060	Endopeptidase (input)	-20.98	MEROPS score threshold (-23.76)	79	80.99		Ctsb
APGSSNTESTTSLGE	P98091	65	79	N-terminus	Ctsb (P00787; CATB_RAT). CTSB (P07858; CATB_HUMAN). Ctsb (P10605; CATB_MOUSE)	GTTVAPGS	MEROPS:C01.060	Endopeptidase (input)	-23.07	MEROPS score threshold (-23.76)	79	80.99		Ctsb
VKGGYTLDANKGGGHQT	Q01107	784	800	N-terminus	Ctsb (P00787; CATB_RAT). CTSB (P07858; CATB_HUMAN). Ctsb (P10605; CATB_MOUSE)	SFEMVKGG	MEROPS:C01.060	Endopeptidase (input)	-23.11	MEROPS score threshold (-23.76)	79	80.99		Ctsb
DIGRVVIGLFG	P80311	56	66	C-terminus	Ctsb (P00787; CATB_RAT). CTSB (P07858; CATB_HUMAN). Ctsb (P10605; CATB_MOUSE)	GLFGKTVP	MEROPS:C01.060	Endopeptidase (input)	-21.44	MEROPS score threshold (-23.76)	79	80.99		Ctsb
GLLDKPDNCPDMLFELMRM	Q05688	502	520	N-terminus	Ctsb (P00787; CATB_RAT). CTSB (P07858; CATB_HUMAN). Ctsb (P10605; CATB_MOUSE)	VMEGGLLD	MEROPS:C01.060	Endopeptidase (input)	-23.08	MEROPS score threshold (-23.76)	79	80.99		Ctsb
GGNGQQQQAMSFAILRIIR	Q05037	437	455	N-terminus	Ctsb (P00787; CATB_RAT). CTSB (P07858; CATB_HUMAN). Ctsb (P10605; CATB_MOUSE)	QQQGGGNG	MEROPS:C01.060	Endopeptidase (input)	-21.32	MEROPS score threshold (-23.76)	79	80.99		Ctsb
LSDPQERAWYDNHREAL	Q0II91	56	72	C-terminus	Ctsb (P00787; CATB_RAT). CTSB (P07858; CATB_HUMAN). Ctsb (P10605; CATB_MOUSE)	REALLKGG	MEROPS:C01.060	Endopeptidase (input)	-21.34	MEROPS score threshold (-23.76)	79	80.99		Ctsb
LGHGGLTAFSSSS	Q0III6	167	179	N-terminus	Ctsb (P00787; CATB_RAT). CTSB (P07858; CATB_HUMAN). Ctsb (P10605; CATB_MOUSE)	SFGSLGHG	MEROPS:C01.060	Endopeptidase (input)	-22.26	MEROPS score threshold (-23.76)	79	80.99		Ctsb
LGHGGLTAFSSSS	Q0III6	167	179	C-terminus	Ctsb (P00787; CATB_RAT). CTSB (P07858; CATB_HUMAN). Ctsb (P10605; CATB_MOUSE)	SSSSAFGG	MEROPS:C01.060	Endopeptidase (input)	-20.03	MEROPS score threshold (-23.76)	79	80.99		Ctsb
LLAGLGHEER	P79114	266	275	N-terminus	Ctsb (P00787; CATB_RAT). CTSB (P07858; CATB_HUMAN). Ctsb (P10605; CATB_MOUSE)	IFYALLAG	MEROPS:C01.060	Endopeptidase (input)	-19.62	MEROPS score threshold (-23.76)	79	80.99		Ctsb
PAPSPLVGFSQFPQQL	Q08E02	259	274	N-terminus	Ctsb (P00787; CATB_RAT). CTSB (P07858; CATB_HUMAN). Ctsb (P10605; CATB_MOUSE)	PPPAPAPS	MEROPS:C01.060	Endopeptidase (input)	-22.79	MEROPS score threshold (-23.76)	79	80.99		Ctsb
SMGFPGLQIGHASQLLDT	Q08E53	229	246	C-terminus	Ctsb (P00787; CATB_RAT). CTSB (P07858; CATB_HUMAN). Ctsb (P10605; CATB_MOUSE)	LLDTQVPS	MEROPS:C01.060	Endopeptidase (input)	-23.39	MEROPS score threshold (-23.76)	79	80.99		Ctsb
AYMVAGTVHWLSN	P58353	411	423	C-terminus	Ctsb (P00787; CATB_RAT). CTSB (P07858; CATB_HUMAN). Ctsb (P10605; CATB_MOUSE)	WLSNFTVG	MEROPS:C01.060	Endopeptidase (input)	-22.71	MEROPS score threshold (-23.76)	79	80.99		Ctsb
FGLRSLLANEEGWPILLGL	P58353	180	198	C-terminus	Ctsb (P00787; CATB_RAT). CTSB (P07858; CATB_HUMAN). Ctsb (P10605; CATB_MOUSE)	LLGLTGIP	MEROPS:C01.060	Endopeptidase (input)	-23.55	MEROPS score threshold (-23.76)	79	80.99		Ctsb
TRAAGTTAPVVTPAAD	P55203	160	175	C-terminus	Ctsb (P00787; CATB_RAT). CTSB (P07858; CATB_HUMAN). Ctsb (P10605; CATB_MOUSE)	PAADALYA	MEROPS:C01.060	Endopeptidase (input)	-22.21	MEROPS score threshold (-23.76)	79	80.99		Ctsb
KEEPPSPPQSPRAEGA	Q08DJ8	298	313	C-terminus	Ctsb (P00787; CATB_RAT). CTSB (P07858; CATB_HUMAN). Ctsb (P10605; CATB_MOUSE)	AEGASPGR	MEROPS:C01.060	Endopeptidase (input)	-23.6	MEROPS score threshold (-23.76)	79	80.99		Ctsb
PEEEPEYHAEAAAQE	Q0III0	126	140	C-terminus	Ctsb (P00787; CATB_RAT). CTSB (P07858; CATB_HUMAN). Ctsb (P10605; CATB_MOUSE)	AAQESFAV	MEROPS:C01.060	Endopeptidase (input)	-23.09	MEROPS score threshold (-23.76)	79	80.99		Ctsb
LSAQKDTLLARHG	Q08DF2	494	506	C-terminus	Ctsb (P00787; CATB_RAT). CTSB (P07858; CATB_HUMAN). Ctsb (P10605; CATB_MOUSE)	ARHGATLL	MEROPS:C01.060	Endopeptidase (input)	-22.73	MEROPS score threshold (-23.76)	79	80.99		Ctsb
GTGGILGYLFGS	Q08E24	264	275	N-terminus	Ctsb (P00787; CATB_RAT). CTSB (P07858; CATB_HUMAN). Ctsb (P10605; CATB_MOUSE)	WTGLGTGG	MEROPS:C01.060	Endopeptidase (input)	-22.34	MEROPS score threshold (-23.76)	79	80.99		Ctsb
PEAEAIVTAASETK	P81282	2939	2952	C-terminus	Ctsb (P00787; CATB_RAT). CTSB (P07858; CATB_HUMAN). Ctsb (P10605; CATB_MOUSE)	SETKLEGA	MEROPS:C01.060	Endopeptidase (input)	-23.28	MEROPS score threshold (-23.76)	79	80.99		Ctsb
VQSLEASILNDTSGDYE	P81282	2281	2297	N-terminus	Ctsb (P00787; CATB_RAT). CTSB (P07858; CATB_HUMAN). Ctsb (P10605; CATB_MOUSE)	LTSQVQSL	MEROPS:C01.060	Endopeptidase (input)	-23.11	MEROPS score threshold (-23.76)	79	80.99		Ctsb
LTSDHKSKVKEIVAQHT	Q07722	853	869	N-terminus	Ctsb (P00787; CATB_RAT). CTSB (P07858; CATB_HUMAN). Ctsb (P10605; CATB_MOUSE)	KIQTLTSD	MEROPS:C01.060	Endopeptidase (input)	-23.7	MEROPS score threshold (-23.76)	79	80.99		Ctsb
AFALPEGLSAPARC	Q0VCE3	277	290	N-terminus	Ctsb (P00787; CATB_RAT). CTSB (P07858; CATB_HUMAN). Ctsb (P10605; CATB_MOUSE)	IRRGAFAL	MEROPS:C01.060	Endopeptidase (input)	-22.91	MEROPS score threshold (-23.76)	79	80.99		Ctsb
VEVEFGGGAELL	Q148F0	7	18	N-terminus	Ctsb (P00787; CATB_RAT). CTSB (P07858; CATB_HUMAN). Ctsb (P10605; CATB_MOUSE)	APLSVEVE	MEROPS:C01.060	Endopeptidase (input)	-23.08	MEROPS score threshold (-23.76)	79	80.99		Ctsb
VEVEFGGGAELL	Q148F0	7	18	C-terminus	Ctsb (P00787; CATB_RAT). CTSB (P07858; CATB_HUMAN). Ctsb (P10605; CATB_MOUSE)	AELLFDGV	MEROPS:C01.060	Endopeptidase (input)	-21.29	MEROPS score threshold (-23.76)	79	80.99		Ctsb
PAPGLPGAGGPVVPGPG	Q0P5L0	6	22	N-terminus	Ctsb (P00787; CATB_RAT). CTSB (P07858; CATB_HUMAN). Ctsb (P10605; CATB_MOUSE)	AGAGPAPG	MEROPS:C01.060	Endopeptidase (input)	-19.28	MEROPS score threshold (-23.76)	79	80.99		Ctsb
PAPGLPGAGGPVVPGPG	Q0P5L0	6	22	C-terminus	Ctsb (P00787; CATB_RAT). CTSB (P07858; CATB_HUMAN). Ctsb (P10605; CATB_MOUSE)	PGPGAGIP	MEROPS:C01.060	Endopeptidase (input)	-21.38	MEROPS score threshold (-23.76)	79	80.99		Ctsb
ASAVVAVGAGGAPAGPA	Q0P5L0	230	246	N-terminus	Ctsb (P00787; CATB_RAT). CTSB (P07858; CATB_HUMAN). Ctsb (P10605; CATB_MOUSE)	GLEEASAV	MEROPS:C01.060	Endopeptidase (input)	-21.56	MEROPS score threshold (-23.76)	79	80.99		Ctsb
ASAVVAVGAGGAPAGPA	Q0P5L0	230	246	C-terminus	Ctsb (P00787; CATB_RAT). CTSB (P07858; CATB_HUMAN). Ctsb (P10605; CATB_MOUSE)	AGPAVIGP	MEROPS:C01.060	Endopeptidase (input)	-19.22	MEROPS score threshold (-23.76)	79	80.99		Ctsb
DALGMDPMMEHEMGGHHPG	Q0VCX4	727	745	N-terminus	Ctsb (P00787; CATB_RAT). CTSB (P07858; CATB_HUMAN). Ctsb (P10605; CATB_MOUSE)	GYGQDALG	MEROPS:C01.060	Endopeptidase (input)	-23.69	MEROPS score threshold (-23.76)	79	80.99		Ctsb
KRASAKAGPHRTVPQR	Q17QP0	93	108	C-terminus	Ctsb (P00787; CATB_RAT). CTSB (P07858; CATB_HUMAN). Ctsb (P10605; CATB_MOUSE)	VPQRAAGR	MEROPS:C01.060	Endopeptidase (input)	-21.86	MEROPS score threshold (-23.76)	79	80.99		Ctsb
WVLALVFGLSLVYF	Q17QN8	17	30	C-terminus	Ctsb (P00787; CATB_RAT). CTSB (P07858; CATB_HUMAN). Ctsb (P10605; CATB_MOUSE)	LVYFLTST	MEROPS:C01.060	Endopeptidase (input)	-23.25	MEROPS score threshold (-23.76)	79	80.99		Ctsb
METLSYSYC	Q0VCY6	150	158	C-terminus	Ctsb (P00787; CATB_RAT). CTSB (P07858; CATB_HUMAN). Ctsb (P10605; CATB_MOUSE)	YSYCYVGI	MEROPS:C01.060	Endopeptidase (input)	-23.34	MEROPS score threshold (-23.76)	79	80.99		Ctsb
SGPPDSLSDHFTLSFWM	Q0VCN6	364	380	N-terminus	Ctsb (P00787; CATB_RAT). CTSB (P07858; CATB_HUMAN). Ctsb (P10605; CATB_MOUSE)	AGLGSGPP	MEROPS:C01.060	Endopeptidase (input)	-18.81	MEROPS score threshold (-23.76)	79	80.99		Ctsb
EWLKMSYPAKVT	Q0VC58	175	186	C-terminus	Ctsb (P00787; CATB_RAT). CTSB (P07858; CATB_HUMAN). Ctsb (P10605; CATB_MOUSE)	AKVTLLGS	MEROPS:C01.060	Endopeptidase (input)	-19.33	MEROPS score threshold (-23.76)	79	80.99		Ctsb
PPHLPGPPPG	Q0P5D2	340	349	C-terminus	Ctsb (P00787; CATB_RAT). CTSB (P07858; CATB_HUMAN). Ctsb (P10605; CATB_MOUSE)	PPPGAPPP	MEROPS:C01.060	Endopeptidase (input)	-21.62	MEROPS score threshold (-23.76)	79	80.99		Ctsb
REAEQLRFLFRKLASG	Q0V8C2	632	647	C-terminus	Ctsb (P00787; CATB_RAT). CTSB (P07858; CATB_HUMAN). Ctsb (P10605; CATB_MOUSE)	LASGFGEE	MEROPS:C01.060	Endopeptidase (input)	-20.52	MEROPS score threshold (-23.76)	79	80.99		Ctsb
VERGAPALLT	Q148M6	192	201	N-terminus	Ctsb (P00787; CATB_RAT). CTSB (P07858; CATB_HUMAN). Ctsb (P10605; CATB_MOUSE)	EVLAVERG	MEROPS:C01.060	Endopeptidase (input)	-23.45	MEROPS score threshold (-23.76)	79	80.99		Ctsb
AIGPWLSAAAVIHEPKP	Q0VCZ0	149	165	N-terminus	Ctsb (P00787; CATB_RAT). CTSB (P07858; CATB_HUMAN). Ctsb (P10605; CATB_MOUSE)	STARAIGP	MEROPS:C01.060	Endopeptidase (input)	-19.53	MEROPS score threshold (-23.76)	79	80.99		Ctsb
PTRGGDAEAAEAEHTVS	Q17QE3	136	152	N-terminus	Ctsb (P00787; CATB_RAT). CTSB (P07858; CATB_HUMAN). Ctsb (P10605; CATB_MOUSE)	GLAHPTRG	MEROPS:C01.060	Endopeptidase (input)	-23.44	MEROPS score threshold (-23.76)	79	80.99		Ctsb
LTGPLNLNDPEAKCR	Q0VD30	281	295	N-terminus	Ctsb (P00787; CATB_RAT). CTSB (P07858; CATB_HUMAN). Ctsb (P10605; CATB_MOUSE)	YGRFLTGP	MEROPS:C01.060	Endopeptidase (input)	-22.21	MEROPS score threshold (-23.76)	79	80.99		Ctsb
GSSVASAPVSSFPRTS	Q0VD59	54	69	N-terminus	Ctsb (P00787; CATB_RAT). CTSB (P07858; CATB_HUMAN). Ctsb (P10605; CATB_MOUSE)	SKAGGSSV	MEROPS:C01.060	Endopeptidase (input)	-20.26	MEROPS score threshold (-23.76)	79	80.99		Ctsb
GSSVASAPVSSFPRTS	Q0VD59	54	69	C-terminus	Ctsb (P00787; CATB_RAT). CTSB (P07858; CATB_HUMAN). Ctsb (P10605; CATB_MOUSE)	PRTSVTPS	MEROPS:C01.060	Endopeptidase (input)	-23.5	MEROPS score threshold (-23.76)	79	80.99		Ctsb
SPKRVAPDSHQLIKALA	Q1JPD6	138	154	C-terminus	Ctsb (P00787; CATB_RAT). CTSB (P07858; CATB_HUMAN). Ctsb (P10605; CATB_MOUSE)	KALAEAPD	MEROPS:C01.060	Endopeptidase (input)	-23.33	MEROPS score threshold (-23.76)	79	80.99		Ctsb
FIGYTLGSDT	Q0P5J8	444	453	N-terminus	Ctsb (P00787; CATB_RAT). CTSB (P07858; CATB_HUMAN). Ctsb (P10605; CATB_MOUSE)	SRSKFIGY	MEROPS:C01.060	Endopeptidase (input)	-23.38	MEROPS score threshold (-23.76)	79	80.99		Ctsb
FIGYTLGSDT	Q0P5J8	444	453	C-terminus	Ctsb (P00787; CATB_RAT). CTSB (P07858; CATB_HUMAN). Ctsb (P10605; CATB_MOUSE)	GSDTNTVV	MEROPS:C01.060	Endopeptidase (input)	-23.73	MEROPS score threshold (-23.76)	79	80.99		Ctsb
GKMIPQGQRSHSRAPS	Q0VCQ1	164	179	N-terminus	Ctsb (P00787; CATB_RAT). CTSB (P07858; CATB_HUMAN). Ctsb (P10605; CATB_MOUSE)	TRVQSVEQ	MEROPS:C01.060	Endopeptidase (input)	-23.14	MEROPS score threshold (-23.76)	79	80.99		Ctsb
QLLTPSSQPAAGVPGRAA	Q1LZD3	120	137	N-terminus	Ctsb (P00787; CATB_RAT). CTSB (P07858; CATB_HUMAN). Ctsb (P10605; CATB_MOUSE)	GGFQQLLT	MEROPS:C01.060	Endopeptidase (input)	-22.67	MEROPS score threshold (-23.76)	79	80.99		Ctsb
QLLTPSSQPAAGVPGRAA	Q1LZD3	120	137	C-terminus	Ctsb (P00787; CATB_RAT). CTSB (P07858; CATB_HUMAN). Ctsb (P10605; CATB_MOUSE)	GRAAGSPA	MEROPS:C01.060	Endopeptidase (input)	-19.55	MEROPS score threshold (-23.76)	79	80.99		Ctsb
PAMMGMNMNNRG	Q1LZD9	416	427	C-terminus	Ctsb (P00787; CATB_RAT). CTSB (P07858; CATB_HUMAN). Ctsb (P10605; CATB_MOUSE)	NNRGTIPG	MEROPS:C01.060	Endopeptidase (input)	-22.26	MEROPS score threshold (-23.76)	79	80.99		Ctsb
ALALPGEPPVPAAPAGE	Q1LZD9	35	51	N-terminus	Ctsb (P00787; CATB_RAT). CTSB (P07858; CATB_HUMAN). Ctsb (P10605; CATB_MOUSE)	PAALALAL	MEROPS:C01.060	Endopeptidase (input)	-20.02	MEROPS score threshold (-23.76)	79	80.99		Ctsb
AAAAAAAGAAGGRGS	Q28165	5	19	N-terminus	Ctsb (P00787; CATB_RAT). CTSB (P07858; CATB_HUMAN). Ctsb (P10605; CATB_MOUSE)	MAAAAAAA	MEROPS:C01.060	Endopeptidase (input)	-18.7	MEROPS score threshold (-23.76)	79	80.99		Ctsb
YGLSAEVKNKLAQKYDH	Q2HJ38	12	28	N-terminus	Ctsb (P00787; CATB_RAT). CTSB (P07858; CATB_HUMAN). Ctsb (P10605; CATB_MOUSE)	RGPAYGLS	MEROPS:C01.060	Endopeptidase (input)	-23.67	MEROPS score threshold (-23.76)	79	80.99		Ctsb
WNKDPGATPTSEGPMEG	Q27969	214	230	C-terminus	Ctsb (P00787; CATB_RAT). CTSB (P07858; CATB_HUMAN). Ctsb (P10605; CATB_MOUSE)	PMEGHSGA	MEROPS:C01.060	Endopeptidase (input)	-21.77	MEROPS score threshold (-23.76)	79	80.99		Ctsb
QGEGDIIPKISELSL	Q29RT6	391	405	N-terminus	Ctsb (P00787; CATB_RAT). CTSB (P07858; CATB_HUMAN). Ctsb (P10605; CATB_MOUSE)	ILHLQGEG	MEROPS:C01.060	Endopeptidase (input)	-23.22	MEROPS score threshold (-23.76)	79	80.99		Ctsb
PGPMGLTGRPGPVGGPG	Q28083	298	314	C-terminus	Ctsb (P00787; CATB_RAT). CTSB (P07858; CATB_HUMAN). Ctsb (P10605; CATB_MOUSE)	GGPGSSGA	MEROPS:C01.060	Endopeptidase (input)	-17.46	MEROPS score threshold (-23.76)	79	80.99		Ctsb
LGAGPASISCASFLAR	Q28007	193	208	N-terminus	Ctsb (P00787; CATB_RAT). CTSB (P07858; CATB_HUMAN). Ctsb (P10605; CATB_MOUSE)	KIALLGAG	MEROPS:C01.060	Endopeptidase (input)	-19.79	MEROPS score threshold (-23.76)	79	80.99		Ctsb
LGAGPASISCASFLAR	Q28007	193	208	C-terminus	Ctsb (P00787; CATB_RAT). CTSB (P07858; CATB_HUMAN). Ctsb (P10605; CATB_MOUSE)	FLARLGYN	MEROPS:C01.060	Endopeptidase (input)	-22.48	MEROPS score threshold (-23.76)	79	80.99		Ctsb
LVGVTAACTVRKRC	Q1RMT1	348	361	N-terminus	Ctsb (P00787; CATB_RAT). CTSB (P07858; CATB_HUMAN). Ctsb (P10605; CATB_MOUSE)	AGKSLVGV	MEROPS:C01.060	Endopeptidase (input)	-20.32	MEROPS score threshold (-23.76)	79	80.99		Ctsb
GSHMGGNYGDD	Q28009	448	458	N-terminus	Ctsb (P00787; CATB_RAT). CTSB (P07858; CATB_HUMAN). Ctsb (P10605; CATB_MOUSE)	GGPGGSHM	MEROPS:C01.060	Endopeptidase (input)	-21.86	MEROPS score threshold (-23.76)	79	80.99		Ctsb
AVATSKPGLRP	Q1LZG6	31	41	N-terminus	Ctsb (P00787; CATB_RAT). CTSB (P07858; CATB_HUMAN). Ctsb (P10605; CATB_MOUSE)	VPVAAVAT	MEROPS:C01.060	Endopeptidase (input)	-19.05	MEROPS score threshold (-23.76)	79	80.99		Ctsb
PSCMASCGGTIHNATLGR	Q29RN8	343	360	C-terminus	Ctsb (P00787; CATB_RAT). CTSB (P07858; CATB_HUMAN). Ctsb (P10605; CATB_MOUSE)	TLGRIVSP	MEROPS:C01.060	Endopeptidase (input)	-22.55	MEROPS score threshold (-23.76)	79	80.99		Ctsb
LVEAIEIYPLAEAEGVQIS	Q29RK0	877	895	N-terminus	Ctsb (P00787; CATB_RAT). CTSB (P07858; CATB_HUMAN). Ctsb (P10605; CATB_MOUSE)	EALPLVEA	MEROPS:C01.060	Endopeptidase (input)	-23.38	MEROPS score threshold (-23.76)	79	80.99		Ctsb
SQGFPDTYRLFGNIL	Q24K09	1552	1566	N-terminus	Ctsb (P00787; CATB_RAT). CTSB (P07858; CATB_HUMAN). Ctsb (P10605; CATB_MOUSE)	ECARSQGF	MEROPS:C01.060	Endopeptidase (input)	-22.09	MEROPS score threshold (-23.76)	79	80.99		Ctsb
SNPDSTYED	Q24K09	516	524	N-terminus	Ctsb (P00787; CATB_RAT). CTSB (P07858; CATB_HUMAN). Ctsb (P10605; CATB_MOUSE)	EFLQSNPD	MEROPS:C01.060	Endopeptidase (input)	-22.39	MEROPS score threshold (-23.76)	79	80.99		Ctsb
LASYGAHGAQFPDAYGKE	Q2KI29	22	39	N-terminus	Ctsb (P00787; CATB_RAT). CTSB (P07858; CATB_HUMAN). Ctsb (P10605; CATB_MOUSE)	GALGLASY	MEROPS:C01.060	Endopeptidase (input)	-19.06	MEROPS score threshold (-23.76)	79	80.99		Ctsb
ETNSRLDSVLL	Q2KID0	99	109	C-terminus	Ctsb (P00787; CATB_RAT). CTSB (P07858; CATB_HUMAN). Ctsb (P10605; CATB_MOUSE)	SVLLLSSM	MEROPS:C01.060	Endopeptidase (input)	-22.92	MEROPS score threshold (-23.76)	79	80.99		Ctsb
GGSRGAEALHYIGSR	Q2HJ74	9	23	C-terminus	Ctsb (P00787; CATB_RAT). CTSB (P07858; CATB_HUMAN). Ctsb (P10605; CATB_MOUSE)	IGSRLGRT	MEROPS:C01.060	Endopeptidase (input)	-22.58	MEROPS score threshold (-23.76)	79	80.99		Ctsb
DVISQQLVERRGLQAHQAG	Q2KIN6	31	49	N-terminus	Ctsb (P00787; CATB_RAT). CTSB (P07858; CATB_HUMAN). Ctsb (P10605; CATB_MOUSE)	MGLGDVIS	MEROPS:C01.060	Endopeptidase (input)	-22.67	MEROPS score threshold (-23.76)	79	80.99		Ctsb
DVISQQLVERRGLQAHQAG	Q2KIN6	31	49	C-terminus	Ctsb (P00787; CATB_RAT). CTSB (P07858; CATB_HUMAN). Ctsb (P10605; CATB_MOUSE)	HQAGRTLT	MEROPS:C01.060	Endopeptidase (input)	-23.74	MEROPS score threshold (-23.76)	79	80.99		Ctsb
DCRLFEDTLVN	Q2HJ93	278	288	C-terminus	Ctsb (P00787; CATB_RAT). CTSB (P07858; CATB_HUMAN). Ctsb (P10605; CATB_MOUSE)	TLVNFQAA	MEROPS:C01.060	Endopeptidase (input)	-21.15	MEROPS score threshold (-23.76)	79	80.99		Ctsb
GMGHLWRKVHTV	Q2T9W2	458	469	N-terminus	Ctsb (P00787; CATB_RAT). CTSB (P07858; CATB_HUMAN). Ctsb (P10605; CATB_MOUSE)	KALSGMGH	MEROPS:C01.060	Endopeptidase (input)	-22.49	MEROPS score threshold (-23.76)	79	80.99		Ctsb
STHGSLSGLGLMGIKDE	Q2T9U5	745	761	N-terminus	Ctsb (P00787; CATB_RAT). CTSB (P07858; CATB_HUMAN). Ctsb (P10605; CATB_MOUSE)	PGTKSTHG	MEROPS:C01.060	Endopeptidase (input)	-23.04	MEROPS score threshold (-23.76)	79	80.99		Ctsb
ASTFLSPAFPGSQT	Q2LGB3	139	152	N-terminus	Ctsb (P00787; CATB_RAT). CTSB (P07858; CATB_HUMAN). Ctsb (P10605; CATB_MOUSE)	LPSLASTF	MEROPS:C01.060	Endopeptidase (input)	-21.81	MEROPS score threshold (-23.76)	79	80.99		Ctsb
KAISSAVRKAGLANLY	Q2KJJ9	43	58	C-terminus	Ctsb (P00787; CATB_RAT). CTSB (P07858; CATB_HUMAN). Ctsb (P10605; CATB_MOUSE)	ANLYGIAG	MEROPS:C01.060	Endopeptidase (input)	-21.96	MEROPS score threshold (-23.76)	79	80.99		Ctsb
LAEFGEYIRKVFPT	Q2T9M7	76	89	N-terminus	Ctsb (P00787; CATB_RAT). CTSB (P07858; CATB_HUMAN). Ctsb (P10605; CATB_MOUSE)	NTTALAEF	MEROPS:C01.060	Endopeptidase (input)	-22.74	MEROPS score threshold (-23.76)	79	80.99		Ctsb
STFSHFSLFHMAAN	Q2KHV4	210	223	N-terminus	Ctsb (P00787; CATB_RAT). CTSB (P07858; CATB_HUMAN). Ctsb (P10605; CATB_MOUSE)	PMLLSTFS	MEROPS:C01.060	Endopeptidase (input)	-22.79	MEROPS score threshold (-23.76)	79	80.99		Ctsb
GRNIPVTLIDMDKALLY	Q2KIX2	357	373	C-terminus	Ctsb (P00787; CATB_RAT). CTSB (P07858; CATB_HUMAN). Ctsb (P10605; CATB_MOUSE)	ALLYFIHV	MEROPS:C01.060	Endopeptidase (input)	-22.49	MEROPS score threshold (-23.76)	79	80.99		Ctsb
AVGGSGSGSTSGCGSAS	Q2T9W9	31	47	N-terminus	Ctsb (P00787; CATB_RAT). CTSB (P07858; CATB_HUMAN). Ctsb (P10605; CATB_MOUSE)	DLVPAVGG	MEROPS:C01.060	Endopeptidase (input)	-19.98	MEROPS score threshold (-23.76)	79	80.99		Ctsb
AVGGSGSGSTSGCGSAS	Q2T9W9	31	47	C-terminus	Ctsb (P00787; CATB_RAT). CTSB (P07858; CATB_HUMAN). Ctsb (P10605; CATB_MOUSE)	GSASGCGS	MEROPS:C01.060	Endopeptidase (input)	-21.07	MEROPS score threshold (-23.76)	79	80.99		Ctsb
GPRVKDGGALGTKAAQ	Q2HJ91	267	282	N-terminus	Ctsb (P00787; CATB_RAT). CTSB (P07858; CATB_HUMAN). Ctsb (P10605; CATB_MOUSE)	GSLGGPRV	MEROPS:C01.060	Endopeptidase (input)	-21.97	MEROPS score threshold (-23.76)	79	80.99		Ctsb
GPRVKDGGALGTKAAQ	Q2HJ91	267	282	C-terminus	Ctsb (P00787; CATB_RAT). CTSB (P07858; CATB_HUMAN). Ctsb (P10605; CATB_MOUSE)	KAAQAKAA	MEROPS:C01.060	Endopeptidase (input)	-21.93	MEROPS score threshold (-23.76)	79	80.99		Ctsb
AFLHYRDPAEAQQAIAC	Q2KI24	321	337	C-terminus	Ctsb (P00787; CATB_RAT). CTSB (P07858; CATB_HUMAN). Ctsb (P10605; CATB_MOUSE)	AIACLQGF	MEROPS:C01.060	Endopeptidase (input)	-20.4	MEROPS score threshold (-23.76)	79	80.99		Ctsb
VTHDAAHAQM	Q2KI13	638	647	N-terminus	Ctsb (P00787; CATB_RAT). CTSB (P07858; CATB_HUMAN). Ctsb (P10605; CATB_MOUSE)	QSVNVTHD	MEROPS:C01.060	Endopeptidase (input)	-23.11	MEROPS score threshold (-23.76)	79	80.99		Ctsb
AKQGLKKPVRGKQA	Q2YDJ8	153	166	N-terminus	Ctsb (P00787; CATB_RAT). CTSB (P07858; CATB_HUMAN). Ctsb (P10605; CATB_MOUSE)	NAAAAKQG	MEROPS:C01.060	Endopeptidase (input)	-22.03	MEROPS score threshold (-23.76)	79	80.99		Ctsb
LPSLLLGTLLTFTSG	Q2TBI0	1	22	C-terminus	Ctsb (P00787; CATB_RAT). CTSB (P07858; CATB_HUMAN). Ctsb (P10605; CATB_MOUSE)	FTSGALGA	MEROPS:C01.060	Endopeptidase (input)	-18.69	MEROPS score threshold (-23.76)	79	80.99		Ctsb
FPPLWPHSTTTTSPSLPL	Q32KT5	34	51	C-terminus	Ctsb (P00787; CATB_RAT). CTSB (P07858; CATB_HUMAN). Ctsb (P10605; CATB_MOUSE)	SLPLFWSP	MEROPS:C01.060	Endopeptidase (input)	-23.45	MEROPS score threshold (-23.76)	79	80.99		Ctsb
PPAPAPLEKPIVLMK	Q2YDD2	88	102	N-terminus	Ctsb (P00787; CATB_RAT). CTSB (P07858; CATB_HUMAN). Ctsb (P10605; CATB_MOUSE)	APAAPPAP	MEROPS:C01.060	Endopeptidase (input)	-21.93	MEROPS score threshold (-23.76)	79	80.99		Ctsb
SAVGEGKPVLTEEER	Q32KW2	77	91	N-terminus	Ctsb (P00787; CATB_RAT). CTSB (P07858; CATB_HUMAN). Ctsb (P10605; CATB_MOUSE)	KGPGSAVG	MEROPS:C01.060	Endopeptidase (input)	-20.29	MEROPS score threshold (-23.76)	79	80.99		Ctsb
GIKPGCFKIGNTGG	Q32PF2	618	631	N-terminus	Ctsb (P00787; CATB_RAT). CTSB (P07858; CATB_HUMAN). Ctsb (P10605; CATB_MOUSE)	ATVGGIKP	MEROPS:C01.060	Endopeptidase (input)	-21.07	MEROPS score threshold (-23.76)	79	80.99		Ctsb
TGPKGHVSSLAR	Q2YDK1	185	196	N-terminus	Ctsb (P00787; CATB_RAT). CTSB (P07858; CATB_HUMAN). Ctsb (P10605; CATB_MOUSE)	EMVGTGPK	MEROPS:C01.060	Endopeptidase (input)	-22.33	MEROPS score threshold (-23.76)	79	80.99		Ctsb
TGPKGHVSSLAR	Q2YDK1	185	196	C-terminus	Ctsb (P00787; CATB_RAT). CTSB (P07858; CATB_HUMAN). Ctsb (P10605; CATB_MOUSE)	SLARCSIV	MEROPS:C01.060	Endopeptidase (input)	-23.6	MEROPS score threshold (-23.76)	79	80.99		Ctsb
PGPSGEKGETGDVGPM	Q32S24	1161	1176	C-terminus	Ctsb (P00787; CATB_RAT). CTSB (P07858; CATB_HUMAN). Ctsb (P10605; CATB_MOUSE)	VGPMGPPG	MEROPS:C01.060	Endopeptidase (input)	-22.41	MEROPS score threshold (-23.76)	79	80.99		Ctsb
PPGKAGRRG	Q32S24	530	538	N-terminus	Ctsb (P00787; CATB_RAT). CTSB (P07858; CATB_HUMAN). Ctsb (P10605; CATB_MOUSE)	GLMGPPGK	MEROPS:C01.060	Endopeptidase (input)	-22.02	MEROPS score threshold (-23.76)	79	80.99		Ctsb
PPGKAGRRG	Q32S24	530	538	C-terminus	Ctsb (P00787; CATB_RAT). CTSB (P07858; CATB_HUMAN). Ctsb (P10605; CATB_MOUSE)	GRRGRAGA	MEROPS:C01.060	Endopeptidase (input)	-20.57	MEROPS score threshold (-23.76)	79	80.99		Ctsb
GLSAPGLSVLE	Q32PG9	239	249	N-terminus	Ctsb (P00787; CATB_RAT). CTSB (P07858; CATB_HUMAN). Ctsb (P10605; CATB_MOUSE)	LTVRGLSA	MEROPS:C01.060	Endopeptidase (input)	-20.6	MEROPS score threshold (-23.76)	79	80.99		Ctsb
GLSAPGLSVLE	Q32PG9	239	249	C-terminus	Ctsb (P00787; CATB_RAT). CTSB (P07858; CATB_HUMAN). Ctsb (P10605; CATB_MOUSE)	SVLEGMPA	MEROPS:C01.060	Endopeptidase (input)	-23.16	MEROPS score threshold (-23.76)	79	80.99		Ctsb
GRGRSVSGGRGRGGPRG	Q2TBT7	444	460	C-terminus	Ctsb (P00787; CATB_RAT). CTSB (P07858; CATB_HUMAN). Ctsb (P10605; CATB_MOUSE)	GPRGGKSS	MEROPS:C01.060	Endopeptidase (input)	-20.94	MEROPS score threshold (-23.76)	79	80.99		Ctsb
VPAVSSVSHTA	Q32S26	215	225	N-terminus	Ctsb (P00787; CATB_RAT). CTSB (P07858; CATB_HUMAN). Ctsb (P10605; CATB_MOUSE)	SAHQVPAV	MEROPS:C01.060	Endopeptidase (input)	-22.87	MEROPS score threshold (-23.76)	79	80.99		Ctsb
REPKLSENIKNAMLIKG	Q2YDN6	22	38	C-terminus	Ctsb (P00787; CATB_RAT). CTSB (P07858; CATB_HUMAN). Ctsb (P10605; CATB_MOUSE)	LIKGGNAN	MEROPS:C01.060	Endopeptidase (input)	-23.39	MEROPS score threshold (-23.76)	79	80.99		Ctsb
GEAANPKPLGVSEEKDQEP	Q32LK9	302	320	N-terminus	Ctsb (P00787; CATB_RAT). CTSB (P07858; CATB_HUMAN). Ctsb (P10605; CATB_MOUSE)	EAGLGEAA	MEROPS:C01.060	Endopeptidase (input)	-22.78	MEROPS score threshold (-23.76)	79	80.99		Ctsb
PPGAVPPGARFDPFG	Q3SX30	232	246	C-terminus	Ctsb (P00787; CATB_RAT). CTSB (P07858; CATB_HUMAN). Ctsb (P10605; CATB_MOUSE)	DPFGPIGT	MEROPS:C01.060	Endopeptidase (input)	-20.64	MEROPS score threshold (-23.76)	79	80.99		Ctsb
GAGERPLRLNAAAR	Q3T0E1	47	60	N-terminus	Ctsb (P00787; CATB_RAT). CTSB (P07858; CATB_HUMAN). Ctsb (P10605; CATB_MOUSE)	DGPGGAGE	MEROPS:C01.060	Endopeptidase (input)	-18.98	MEROPS score threshold (-23.76)	79	80.99		Ctsb
GAGERPLRLNAAAR	Q3T0E1	47	60	C-terminus	Ctsb (P00787; CATB_RAT). CTSB (P07858; CATB_HUMAN). Ctsb (P10605; CATB_MOUSE)	AAARSRGR	MEROPS:C01.060	Endopeptidase (input)	-22.95	MEROPS score threshold (-23.76)	79	80.99		Ctsb
TAVNKRTANVSAGGGGAQ	Q3B7M6	319	336	C-terminus	Ctsb (P00787; CATB_RAT). CTSB (P07858; CATB_HUMAN). Ctsb (P10605; CATB_MOUSE)	GGAQNPGV	MEROPS:C01.060	Endopeptidase (input)	-19.63	MEROPS score threshold (-23.76)	79	80.99		Ctsb
GSGPDGPLGVEQSGKTDQ	Q3MHH2	16	33	N-terminus	Ctsb (P00787; CATB_RAT). CTSB (P07858; CATB_HUMAN). Ctsb (P10605; CATB_MOUSE)	AVPLGSGP	MEROPS:C01.060	Endopeptidase (input)	-19.57	MEROPS score threshold (-23.76)	79	80.99		Ctsb
GAHMNKGMGHKFL	Q3MHG6	209	221	N-terminus	Ctsb (P00787; CATB_RAT). CTSB (P07858; CATB_HUMAN). Ctsb (P10605; CATB_MOUSE)	GLIEGAHM	MEROPS:C01.060	Endopeptidase (input)	-22.06	MEROPS score threshold (-23.76)	79	80.99		Ctsb
TGSRFGLGDKVRYRC	Q3SYW2	163	177	N-terminus	Ctsb (P00787; CATB_RAT). CTSB (P07858; CATB_HUMAN). Ctsb (P10605; CATB_MOUSE)	GAVRTGSR	MEROPS:C01.060	Endopeptidase (input)	-22.44	MEROPS score threshold (-23.76)	79	80.99		Ctsb
GYGDVGKGCAQALR	Q3MHL4	220	233	N-terminus	Ctsb (P00787; CATB_RAT). CTSB (P07858; CATB_HUMAN). Ctsb (P10605; CATB_MOUSE)	AVVAGYGD	MEROPS:C01.060	Endopeptidase (input)	-19.33	MEROPS score threshold (-23.76)	79	80.99		Ctsb
GYGDVGKGCAQALR	Q3MHL4	220	233	C-terminus	Ctsb (P00787; CATB_RAT). CTSB (P07858; CATB_HUMAN). Ctsb (P10605; CATB_MOUSE)	QALRGFGA	MEROPS:C01.060	Endopeptidase (input)	-19.25	MEROPS score threshold (-23.76)	79	80.99		Ctsb
LTVTSPVLMWVQ	Q3SYZ6	59	70	C-terminus	Ctsb (P00787; CATB_RAT). CTSB (P07858; CATB_HUMAN). Ctsb (P10605; CATB_MOUSE)	MWVQALDI	MEROPS:C01.060	Endopeptidase (input)	-23.62	MEROPS score threshold (-23.76)	79	80.99		Ctsb
SAADAQAIADMAAYQLEL	Q3SZC2	68	85	N-terminus	Ctsb (P00787; CATB_RAT). CTSB (P07858; CATB_HUMAN). Ctsb (P10605; CATB_MOUSE)	ALSGSAAD	MEROPS:C01.060	Endopeptidase (input)	-17.94	MEROPS score threshold (-23.76)	79	80.99		Ctsb
SLGDSIYSIGGSDDS	Q3B7M1	490	504	N-terminus	Ctsb (P00787; CATB_RAT). CTSB (P07858; CATB_HUMAN). Ctsb (P10605; CATB_MOUSE)	HSMCSLGD	MEROPS:C01.060	Endopeptidase (input)	-22.83	MEROPS score threshold (-23.76)	79	80.99		Ctsb
LRPGQPGLPPFL	Q3SX44	223	234	C-terminus	Ctsb (P00787; CATB_RAT). CTSB (P07858; CATB_HUMAN). Ctsb (P10605; CATB_MOUSE)	PPFLLHRG	MEROPS:C01.060	Endopeptidase (input)	-23.22	MEROPS score threshold (-23.76)	79	80.99		Ctsb
LASGEGAAAGLPALD	Q3SX44	23	37	N-terminus	Ctsb (P00787; CATB_RAT). CTSB (P07858; CATB_HUMAN). Ctsb (P10605; CATB_MOUSE)	VPESLASG	MEROPS:C01.060	Endopeptidase (input)	-21.4	MEROPS score threshold (-23.76)	79	80.99		Ctsb
LASGEGAAAGLPALD	Q3SX44	23	37	C-terminus	Ctsb (P00787; CATB_RAT). CTSB (P07858; CATB_HUMAN). Ctsb (P10605; CATB_MOUSE)	PALDLAKA	MEROPS:C01.060	Endopeptidase (input)	-22.39	MEROPS score threshold (-23.76)	79	80.99		Ctsb
LIPMIGFIGLGMGSAALYL	Q3SZ44	20	38	C-terminus	Ctsb (P00787; CATB_RAT). CTSB (P07858; CATB_HUMAN). Ctsb (P10605; CATB_MOUSE)	ALYLLRLA	MEROPS:C01.060	Endopeptidase (input)	-23.42	MEROPS score threshold (-23.76)	79	80.99		Ctsb
DAQHESGQSSS	Q3T013	77	87	C-terminus	Ctsb (P00787; CATB_RAT). CTSB (P07858; CATB_HUMAN). Ctsb (P10605; CATB_MOUSE)	QSSSRGSS	MEROPS:C01.060	Endopeptidase (input)	-23.62	MEROPS score threshold (-23.76)	79	80.99		Ctsb
LLLQDFSRNLSAKSSAL	Q3SZ87	15	31	C-terminus	Ctsb (P00787; CATB_RAT). CTSB (P07858; CATB_HUMAN). Ctsb (P10605; CATB_MOUSE)	SSALFFGN	MEROPS:C01.060	Endopeptidase (input)	-21.16	MEROPS score threshold (-23.76)	79	80.99		Ctsb
QSPAAGAPKVLLLSG	Q3SZZ2	8	22	N-terminus	Ctsb (P00787; CATB_RAT). CTSB (P07858; CATB_HUMAN). Ctsb (P10605; CATB_MOUSE)	VAPAQSPA	MEROPS:C01.060	Endopeptidase (input)	-22.96	MEROPS score threshold (-23.76)	79	80.99		Ctsb
QSPAAGAPKVLLLSG	Q3SZZ2	8	22	C-terminus	Ctsb (P00787; CATB_RAT). CTSB (P07858; CATB_HUMAN). Ctsb (P10605; CATB_MOUSE)	LLSGQPAA	MEROPS:C01.060	Endopeptidase (input)	-21.24	MEROPS score threshold (-23.76)	79	80.99		Ctsb
SRVHAGSKAALA	Q3T005	30	41	C-terminus	Ctsb (P00787; CATB_RAT). CTSB (P07858; CATB_HUMAN). Ctsb (P10605; CATB_MOUSE)	AALAALCP	MEROPS:C01.060	Endopeptidase (input)	-21.61	MEROPS score threshold (-23.76)	79	80.99		Ctsb
TPPFSSSCGVLGTG	Q3MHZ4	71	84	N-terminus	Ctsb (P00787; CATB_RAT). CTSB (P07858; CATB_HUMAN). Ctsb (P10605; CATB_MOUSE)	AAPATPPF	MEROPS:C01.060	Endopeptidase (input)	-23.33	MEROPS score threshold (-23.76)	79	80.99		Ctsb
LSAGENVLPSTMQPGDD	Q58DA4	141	157	N-terminus	Ctsb (P00787; CATB_RAT). CTSB (P07858; CATB_HUMAN). Ctsb (P10605; CATB_MOUSE)	FFVSLSAG	MEROPS:C01.060	Endopeptidase (input)	-19.96	MEROPS score threshold (-23.76)	79	80.99		Ctsb
LLRGEVVPASSEARKK	Q3ZC80	258	273	N-terminus	Ctsb (P00787; CATB_RAT). CTSB (P07858; CATB_HUMAN). Ctsb (P10605; CATB_MOUSE)	AVYGLLRG	MEROPS:C01.060	Endopeptidase (input)	-20.92	MEROPS score threshold (-23.76)	79	80.99		Ctsb
VYSVVLAAGLPLNALA	Q3ZC80	27	42	C-terminus	Ctsb (P00787; CATB_RAT). CTSB (P07858; CATB_HUMAN). Ctsb (P10605; CATB_MOUSE)	NALALWVF	MEROPS:C01.060	Endopeptidase (input)	-22.72	MEROPS score threshold (-23.76)	79	80.99		Ctsb
QLHTLDTDLHSLAQIGGKS	Q5BIM2	182	200	N-terminus	Ctsb (P00787; CATB_RAT). CTSB (P07858; CATB_HUMAN). Ctsb (P10605; CATB_MOUSE)	APPGQLHT	MEROPS:C01.060	Endopeptidase (input)	-23.08	MEROPS score threshold (-23.76)	79	80.99		Ctsb
QLHTLDTDLHSLAQIGGKS	Q5BIM2	182	200	C-terminus	Ctsb (P00787; CATB_RAT). CTSB (P07858; CATB_HUMAN). Ctsb (P10605; CATB_MOUSE)	GGKSLVSG	MEROPS:C01.060	Endopeptidase (input)	-21.07	MEROPS score threshold (-23.76)	79	80.99		Ctsb
AVGMPANAVTLWMLFRT	Q58D85	106	122	N-terminus	Ctsb (P00787; CATB_RAT). CTSB (P07858; CATB_HUMAN). Ctsb (P10605; CATB_MOUSE)	ILVFAVGM	MEROPS:C01.060	Endopeptidase (input)	-20.64	MEROPS score threshold (-23.76)	79	80.99		Ctsb
VPEVMMLEACSRIQEFCEQ	Q58CZ9	415	433	N-terminus	Ctsb (P00787; CATB_RAT). CTSB (P07858; CATB_HUMAN). Ctsb (P10605; CATB_MOUSE)	VVITVPEV	MEROPS:C01.060	Endopeptidase (input)	-23.75	MEROPS score threshold (-23.76)	79	80.99		Ctsb
TGLSKPREGFPSFQA	Q3ZCH5	32	46	C-terminus	Ctsb (P00787; CATB_RAT). CTSB (P07858; CATB_HUMAN). Ctsb (P10605; CATB_MOUSE)	SFQAVAYL	MEROPS:C01.060	Endopeptidase (input)	-23.56	MEROPS score threshold (-23.76)	79	80.99		Ctsb
LNIAASAAVQAA	Q3ZCI8	126	137	N-terminus	Ctsb (P00787; CATB_RAT). CTSB (P07858; CATB_HUMAN). Ctsb (P10605; CATB_MOUSE)	GKRGLNIA	MEROPS:C01.060	Endopeptidase (input)	-22.84	MEROPS score threshold (-23.76)	79	80.99		Ctsb
APTGRAPSTMTGSGV	Q3T904	663	677	N-terminus	Ctsb (P00787; CATB_RAT). CTSB (P07858; CATB_HUMAN). Ctsb (P10605; CATB_MOUSE)	QPGQAPTG	MEROPS:C01.060	Endopeptidase (input)	-23.12	MEROPS score threshold (-23.76)	79	80.99		Ctsb
ASEGGAEDGASGVGGSA	Q59HJ6	86	102	N-terminus	Ctsb (P00787; CATB_RAT). CTSB (P07858; CATB_HUMAN). Ctsb (P10605; CATB_MOUSE)	GGEDASEG	MEROPS:C01.060	Endopeptidase (input)	-22.92	MEROPS score threshold (-23.76)	79	80.99		Ctsb
ASEGGAEDGASGVGGSA	Q59HJ6	86	102	C-terminus	Ctsb (P00787; CATB_RAT). CTSB (P07858; CATB_HUMAN). Ctsb (P10605; CATB_MOUSE)	GGSAGGGE	MEROPS:C01.060	Endopeptidase (input)	-17.4	MEROPS score threshold (-23.76)	79	80.99		Ctsb
ASSLLQKSKLGFL	Q58DC2	124	136	N-terminus	Ctsb (P00787; CATB_RAT). CTSB (P07858; CATB_HUMAN). Ctsb (P10605; CATB_MOUSE)	LGFNASSL	MEROPS:C01.060	Endopeptidase (input)	-21.87	MEROPS score threshold (-23.76)	79	80.99		Ctsb
ASSLLQKSKLGFL	Q58DC2	124	136	C-terminus	Ctsb (P00787; CATB_RAT). CTSB (P07858; CATB_HUMAN). Ctsb (P10605; CATB_MOUSE)	LGFLNATS	MEROPS:C01.060	Endopeptidase (input)	-21.95	MEROPS score threshold (-23.76)	79	80.99		Ctsb
KGLKFTVSSGCSSE	Q5BIM8	293	306	C-terminus	Ctsb (P00787; CATB_RAT). CTSB (P07858; CATB_HUMAN). Ctsb (P10605; CATB_MOUSE)	CSSEFVFV	MEROPS:C01.060	Endopeptidase (input)	-23.51	MEROPS score threshold (-23.76)	79	80.99		Ctsb
RHRSGMVTAA	Q3ZBI5	20	29	C-terminus	Ctsb (P00787; CATB_RAT). CTSB (P07858; CATB_HUMAN). Ctsb (P10605; CATB_MOUSE)	VTAASQGG	MEROPS:C01.060	Endopeptidase (input)	-18.61	MEROPS score threshold (-23.76)	79	80.99		Ctsb
YLPIGGKLTPQSP	Q58DL5	342	354	C-terminus	Ctsb (P00787; CATB_RAT). CTSB (P07858; CATB_HUMAN). Ctsb (P10605; CATB_MOUSE)	PQSPSVGT	MEROPS:C01.060	Endopeptidase (input)	-22.49	MEROPS score threshold (-23.76)	79	80.99		Ctsb
SMGYVQAMKPPGAQG	Q58CN7	56	70	C-terminus	Ctsb (P00787; CATB_RAT). CTSB (P07858; CATB_HUMAN). Ctsb (P10605; CATB_MOUSE)	GAQGSQST	MEROPS:C01.060	Endopeptidase (input)	-21.44	MEROPS score threshold (-23.76)	79	80.99		Ctsb
AAVWADPGKYALMGAA	Q4PKH3	542	557	C-terminus	Ctsb (P00787; CATB_RAT). CTSB (P07858; CATB_HUMAN). Ctsb (P10605; CATB_MOUSE)	MGAAAQLG	MEROPS:C01.060	Endopeptidase (input)	-20.47	MEROPS score threshold (-23.76)	79	80.99		Ctsb
LVLLSLDYLTSLF	Q58DD2	383	395	N-terminus	Ctsb (P00787; CATB_RAT). CTSB (P07858; CATB_HUMAN). Ctsb (P10605; CATB_MOUSE)	MTGALVLL	MEROPS:C01.060	Endopeptidase (input)	-23.32	MEROPS score threshold (-23.76)	79	80.99		Ctsb
AIIIGFGQIKNLLGLQH	Q58DD2	158	174	N-terminus	Ctsb (P00787; CATB_RAT). CTSB (P07858; CATB_HUMAN). Ctsb (P10605; CATB_MOUSE)	TSAAAIII	MEROPS:C01.060	Endopeptidase (input)	-21.94	MEROPS score threshold (-23.76)	79	80.99		Ctsb
HPGSLVEKLPDSPA	Q58CP9	562	575	N-terminus	Ctsb (P00787; CATB_RAT). CTSB (P07858; CATB_HUMAN). Ctsb (P10605; CATB_MOUSE)	IEGAHPGS	MEROPS:C01.060	Endopeptidase (input)	-23.23	MEROPS score threshold (-23.76)	79	80.99		Ctsb
GWEYAFEGTAGRF	Q3T110	126	138	C-terminus	Ctsb (P00787; CATB_RAT). CTSB (P07858; CATB_HUMAN). Ctsb (P10605; CATB_MOUSE)	AGRFLTDS	MEROPS:C01.060	Endopeptidase (input)	-23.14	MEROPS score threshold (-23.76)	79	80.99		Ctsb
TLLGVLTHGELDNGRGF	Q58DC5	175	191	N-terminus	Ctsb (P00787; CATB_RAT). CTSB (P07858; CATB_HUMAN). Ctsb (P10605; CATB_MOUSE)	AGKSTLLG	MEROPS:C01.060	Endopeptidase (input)	-23.32	MEROPS score threshold (-23.76)	79	80.99		Ctsb
VFAQADGSAYIEQGNTKA	Q7YRA3	31	48	N-terminus	Ctsb (P00787; CATB_RAT). CTSB (P07858; CATB_HUMAN). Ctsb (P10605; CATB_MOUSE)	ARMGVFAQ	MEROPS:C01.060	Endopeptidase (input)	-23.28	MEROPS score threshold (-23.76)	79	80.99		Ctsb
VFAQADGSAYIEQGNTKA	Q7YRA3	31	48	C-terminus	Ctsb (P00787; CATB_RAT). CTSB (P07858; CATB_HUMAN). Ctsb (P10605; CATB_MOUSE)	NTKALAVV	MEROPS:C01.060	Endopeptidase (input)	-23.34	MEROPS score threshold (-23.76)	79	80.99		Ctsb
AGPKGSTGAQG	Q5I2E5	87	97	C-terminus	Ctsb (P00787; CATB_RAT). CTSB (P07858; CATB_HUMAN). Ctsb (P10605; CATB_MOUSE)	GAQGEKGA	MEROPS:C01.060	Endopeptidase (input)	-22.22	MEROPS score threshold (-23.76)	79	80.99		Ctsb
AAAAAAAGPGSPGAAAVVK	Q6VFT7	229	247	N-terminus	Ctsb (P00787; CATB_RAT). CTSB (P07858; CATB_HUMAN). Ctsb (P10605; CATB_MOUSE)	AAAAAAAA	MEROPS:C01.060	Endopeptidase (input)	-17.84	MEROPS score threshold (-23.76)	79	80.99		Ctsb
AAAAAAAGPGSPGAAAVVK	Q6VFT7	229	247	C-terminus	Ctsb (P00787; CATB_RAT). CTSB (P07858; CATB_HUMAN). Ctsb (P10605; CATB_MOUSE)	AVVKGLAG	MEROPS:C01.060	Endopeptidase (input)	-20.33	MEROPS score threshold (-23.76)	79	80.99		Ctsb
TVAAGGGSRLFFRS	Q75WB5	351	364	C-terminus	Ctsb (P00787; CATB_RAT). CTSB (P07858; CATB_HUMAN). Ctsb (P10605; CATB_MOUSE)	FFRSGLFV	MEROPS:C01.060	Endopeptidase (input)	-23.22	MEROPS score threshold (-23.76)	79	80.99		Ctsb
TPTGKESIVQVHIEVM	Q6URK6	454	469	N-terminus	Ctsb (P00787; CATB_RAT). CTSB (P07858; CATB_HUMAN). Ctsb (P10605; CATB_MOUSE)	DLSGTPTG	MEROPS:C01.060	Endopeptidase (input)	-21.39	MEROPS score threshold (-23.76)	79	80.99		Ctsb
REVELGLDYGTPTMN	Q8MJK1	32	46	C-terminus	Ctsb (P00787; CATB_RAT). CTSB (P07858; CATB_HUMAN). Ctsb (P10605; CATB_MOUSE)	PTMNLAGQ	MEROPS:C01.060	Endopeptidase (input)	-21.76	MEROPS score threshold (-23.76)	79	80.99		Ctsb
ATAVGMNMLTKRAPP	Q5EA43	159	173	N-terminus	Ctsb (P00787; CATB_RAT). CTSB (P07858; CATB_HUMAN). Ctsb (P10605; CATB_MOUSE)	TTAVATAV	MEROPS:C01.060	Endopeptidase (input)	-23.49	MEROPS score threshold (-23.76)	79	80.99		Ctsb
GALIGGVVGGPIGLLA	Q5E9Y2	236	251	N-terminus	Ctsb (P00787; CATB_RAT). CTSB (P07858; CATB_HUMAN). Ctsb (P10605; CATB_MOUSE)	LPVAGALI	MEROPS:C01.060	Endopeptidase (input)	-19.3	MEROPS score threshold (-23.76)	79	80.99		Ctsb
GALIGGVVGGPIGLLA	Q5E9Y2	236	251	C-terminus	Ctsb (P00787; CATB_RAT). CTSB (P07858; CATB_HUMAN). Ctsb (P10605; CATB_MOUSE)	GLLAGFKV	MEROPS:C01.060	Endopeptidase (input)	-21.34	MEROPS score threshold (-23.76)	79	80.99		Ctsb
SQGSVPEPLN	Q5E9J8	101	110	N-terminus	Ctsb (P00787; CATB_RAT). CTSB (P07858; CATB_HUMAN). Ctsb (P10605; CATB_MOUSE)	GISASQGS	MEROPS:C01.060	Endopeptidase (input)	-18.87	MEROPS score threshold (-23.76)	79	80.99		Ctsb
LPQLEPAEEAARLHAE	Q5QQ49	789	804	C-terminus	Ctsb (P00787; CATB_RAT). CTSB (P07858; CATB_HUMAN). Ctsb (P10605; CATB_MOUSE)	LHAELTGP	MEROPS:C01.060	Endopeptidase (input)	-20	MEROPS score threshold (-23.76)	79	80.99		Ctsb
LTKFFYAISSSKSSNV	Q5BIM9	363	378	N-terminus	Ctsb (P00787; CATB_RAT). CTSB (P07858; CATB_HUMAN). Ctsb (P10605; CATB_MOUSE)	LLITLTKF	MEROPS:C01.060	Endopeptidase (input)	-22.55	MEROPS score threshold (-23.76)	79	80.99		Ctsb
FGSRSLYNLGGSKR	Q5XQN5	60	73	N-terminus	Ctsb (P00787; CATB_RAT). CTSB (P07858; CATB_HUMAN). Ctsb (P10605; CATB_MOUSE)	GAGGFGSR	MEROPS:C01.060	Endopeptidase (input)	-22.02	MEROPS score threshold (-23.76)	79	80.99		Ctsb
GMGPDTAPQA	Q5E9V5	134	143	N-terminus	Ctsb (P00787; CATB_RAT). CTSB (P07858; CATB_HUMAN). Ctsb (P10605; CATB_MOUSE)	YALGGMGP	MEROPS:C01.060	Endopeptidase (input)	-20.67	MEROPS score threshold (-23.76)	79	80.99		Ctsb
GGFTTDKQPLSDAWTY	Q5E9A7	285	300	N-terminus	Ctsb (P00787; CATB_RAT). CTSB (P07858; CATB_HUMAN). Ctsb (P10605; CATB_MOUSE)	LFLFGGFT	MEROPS:C01.060	Endopeptidase (input)	-22.54	MEROPS score threshold (-23.76)	79	80.99		Ctsb
GGPLMWALLLPLLLHQAG	Q8MII8	2	19	C-terminus	Ctsb (P00787; CATB_RAT). CTSB (P07858; CATB_HUMAN). Ctsb (P10605; CATB_MOUSE)	HQAGSQTS	MEROPS:C01.060	Endopeptidase (input)	-22.16	MEROPS score threshold (-23.76)	79	80.99		Ctsb
SAVWGPLGEC	Q5E966	151	160	C-terminus	Ctsb (P00787; CATB_RAT). CTSB (P07858; CATB_HUMAN). Ctsb (P10605; CATB_MOUSE)	LGECIIAG	MEROPS:C01.060	Endopeptidase (input)	-23.15	MEROPS score threshold (-23.76)	79	80.99		Ctsb
SFTAWDSGSAAP	Q645M6	195	206	N-terminus	Ctsb (P00787; CATB_RAT). CTSB (P07858; CATB_HUMAN). Ctsb (P10605; CATB_MOUSE)	ANPGSFTA	MEROPS:C01.060	Endopeptidase (input)	-23	MEROPS score threshold (-23.76)	79	80.99		Ctsb
LDLFTVLLQQNELNAEHTA	Q645M6	43	61	N-terminus	Ctsb (P00787; CATB_RAT). CTSB (P07858; CATB_HUMAN). Ctsb (P10605; CATB_MOUSE)	AQSGLDLF	MEROPS:C01.060	Endopeptidase (input)	-22.57	MEROPS score threshold (-23.76)	79	80.99		Ctsb
SNVHVILQPNSQPL	Q71SP7	398	411	N-terminus	Ctsb (P00787; CATB_RAT). CTSB (P07858; CATB_HUMAN). Ctsb (P10605; CATB_MOUSE)	GFGGSNVH	MEROPS:C01.060	Endopeptidase (input)	-22.49	MEROPS score threshold (-23.76)	79	80.99		Ctsb
PGNPQKECATVFAH	Q864U1	868	881	C-terminus	Ctsb (P00787; CATB_RAT). CTSB (P07858; CATB_HUMAN). Ctsb (P10605; CATB_MOUSE)	VFAHSGSL	MEROPS:C01.060	Endopeptidase (input)	-21.88	MEROPS score threshold (-23.76)	79	80.99		Ctsb
CRHTRRSSMSVEAETT	Q5MD62	359	374	C-terminus	Ctsb (P00787; CATB_RAT). CTSB (P07858; CATB_HUMAN). Ctsb (P10605; CATB_MOUSE)	AETTTTFS	MEROPS:C01.060	Endopeptidase (input)	-23.62	MEROPS score threshold (-23.76)	79	80.99		Ctsb
EGDTPQHLSPVQLLHQLQA	Q8MJ05	1074	1092	C-terminus	Ctsb (P00787; CATB_RAT). CTSB (P07858; CATB_HUMAN). Ctsb (P10605; CATB_MOUSE)	QLQALVPS	MEROPS:C01.060	Endopeptidase (input)	-20.38	MEROPS score threshold (-23.76)	79	80.99		Ctsb
NGGLPQTTSEKS	Q8MJ05	562	573	N-terminus	Ctsb (P00787; CATB_RAT). CTSB (P07858; CATB_HUMAN). Ctsb (P10605; CATB_MOUSE)	EMSHNGGL	MEROPS:C01.060	Endopeptidase (input)	-22.87	MEROPS score threshold (-23.76)	79	80.99		Ctsb
LNSGTNPIIYTLSNKE	Q5E9P3	302	317	N-terminus	Ctsb (P00787; CATB_RAT). CTSB (P07858; CATB_HUMAN). Ctsb (P10605; CATB_MOUSE)	VLAVLNSG	MEROPS:C01.060	Endopeptidase (input)	-21.6	MEROPS score threshold (-23.76)	79	80.99		Ctsb
QGAGMQGASIQGGGQPGG	Q8HXM1	500	517	N-terminus	Ctsb (P00787; CATB_RAT). CTSB (P07858; CATB_HUMAN). Ctsb (P10605; CATB_MOUSE)	VPVMQGAG	MEROPS:C01.060	Endopeptidase (input)	-21.38	MEROPS score threshold (-23.76)	79	80.99		Ctsb
QGAGMQGASIQGGGQPGG	Q8HXM1	500	517	C-terminus	Ctsb (P00787; CATB_RAT). CTSB (P07858; CATB_HUMAN). Ctsb (P10605; CATB_MOUSE)	QPGGFSPG	MEROPS:C01.060	Endopeptidase (input)	-20.01	MEROPS score threshold (-23.76)	79	80.99		Ctsb
VPDGAATAARLLVPAS	Q9TT96	22	37	C-terminus	Ctsb (P00787; CATB_RAT). CTSB (P07858; CATB_HUMAN). Ctsb (P10605; CATB_MOUSE)	VPASPPAS	MEROPS:C01.060	Endopeptidase (input)	-23.1	MEROPS score threshold (-23.76)	79	80.99		Ctsb
QGSGSGSGSGSGPGSGGA	Q8SQ24	134	151	C-terminus	Ctsb (P00787; CATB_RAT). CTSB (P07858; CATB_HUMAN). Ctsb (P10605; CATB_MOUSE)	SGGAGGPG	MEROPS:C01.060	Endopeptidase (input)	-20.17	MEROPS score threshold (-23.76)	79	80.99		Ctsb
ASSTHGRNFVSFR	Q8SQG8	262	274	N-terminus	Ctsb (P00787; CATB_RAT). CTSB (P07858; CATB_HUMAN). Ctsb (P10605; CATB_MOUSE)	EETLASST	MEROPS:C01.060	Endopeptidase (input)	-23.11	MEROPS score threshold (-23.76)	79	80.99		Ctsb
ASSTHGRNFVSFR	Q8SQG8	262	274	C-terminus	Ctsb (P00787; CATB_RAT). CTSB (P07858; CATB_HUMAN). Ctsb (P10605; CATB_MOUSE)	VSFRVQEA	MEROPS:C01.060	Endopeptidase (input)	-22.86	MEROPS score threshold (-23.76)	79	80.99		Ctsb
RGLAVAGGGESS	Q8WMX8	7	18	N-terminus	Ctsb (P00787; CATB_RAT). CTSB (P07858; CATB_HUMAN). Ctsb (P10605; CATB_MOUSE)	AGPLRGLA	MEROPS:C01.060	Endopeptidase (input)	-23.65	MEROPS score threshold (-23.76)	79	80.99		Ctsb
MAPGPGLWQSEGTS	Q95141	388	401	C-terminus	Ctsb (P00787; CATB_RAT). CTSB (P07858; CATB_HUMAN). Ctsb (P10605; CATB_MOUSE)	EGTSGGYQ	MEROPS:C01.060	Endopeptidase (input)	-23.23	MEROPS score threshold (-23.76)	79	80.99		Ctsb
LQAPFTDCGDGPML	Q9TU34	523	536	N-terminus	Ctsb (P00787; CATB_RAT). CTSB (P07858; CATB_HUMAN). Ctsb (P10605; CATB_MOUSE)	IFKLLQAP	MEROPS:C01.060	Endopeptidase (input)	-23.67	MEROPS score threshold (-23.76)	79	80.99		Ctsb
SILSTCEKDNCS	Q8WN96	2447	2458	N-terminus	Ctsb (P00787; CATB_RAT). CTSB (P07858; CATB_HUMAN). Ctsb (P10605; CATB_MOUSE)	MTLTSILS	MEROPS:C01.060	Endopeptidase (input)	-22.86	MEROPS score threshold (-23.76)	79	80.99		Ctsb
WGIQPRLLLPTVPVSGSR	Q9TT93	18	35	C-terminus	Ctsb (P00787; CATB_RAT). CTSB (P07858; CATB_HUMAN). Ctsb (P10605; CATB_MOUSE)	SGSRLVWL	MEROPS:C01.060	Endopeptidase (input)	-22.58	MEROPS score threshold (-23.76)	79	80.99		Ctsb
YGASPDIDTGTGPTPT	Q9GLE5	446	461	C-terminus	Ctsb (P00787; CATB_RAT). CTSB (P07858; CATB_HUMAN). Ctsb (P10605; CATB_MOUSE)	PTPTLGPV	MEROPS:C01.060	Endopeptidase (input)	-22.49	MEROPS score threshold (-23.76)	79	80.99		Ctsb
TPAMSRPAELYTQILAVRP	Q9TTA5	578	596	N-terminus	Ctsb (P00787; CATB_RAT). CTSB (P07858; CATB_HUMAN). Ctsb (P10605; CATB_MOUSE)	LLSGTPAM	MEROPS:C01.060	Endopeptidase (input)	-22.28	MEROPS score threshold (-23.76)	79	80.99		Ctsb
LNVHMNPPQVKAT	Q95115	360	372	C-terminus	Ctsb (P00787; CATB_RAT). CTSB (P07858; CATB_HUMAN). Ctsb (P10605; CATB_MOUSE)	VKATIISE	MEROPS:C01.060	Endopeptidase (input)	-23.38	MEROPS score threshold (-23.76)	79	80.99		Ctsb
GGGDYLKKPGGVGEA	Q95JH2	271	285	N-terminus	Ctsb (P00787; CATB_RAT). CTSB (P07858; CATB_HUMAN). Ctsb (P10605; CATB_MOUSE)	TDGRGGGD	MEROPS:C01.060	Endopeptidase (input)	-23.02	MEROPS score threshold (-23.76)	79	80.99		Ctsb
THPTPAPGPSAH	Q9XS49	166	177	C-terminus	Ctsb (P00787; CATB_RAT). CTSB (P07858; CATB_HUMAN). Ctsb (P10605; CATB_MOUSE)	PSAHAAPS	MEROPS:C01.060	Endopeptidase (input)	-21.28	MEROPS score threshold (-23.76)	79	80.99		Ctsb
TTAGILATLSHCIELMVKR	Q9GKI7	251	269	N-terminus	Ctsb (P00787; CATB_RAT). CTSB (P07858; CATB_HUMAN). Ctsb (P10605; CATB_MOUSE)	TFKATTAG	MEROPS:C01.060	Endopeptidase (input)	-22.74	MEROPS score threshold (-23.76)	79	80.99		Ctsb
LGDPAGGSTPPARQ	Q9MZL7	532	545	N-terminus	Ctsb (P00787; CATB_RAT). CTSB (P07858; CATB_HUMAN). Ctsb (P10605; CATB_MOUSE)	EGPGLGDP	MEROPS:C01.060	Endopeptidase (input)	-21.15	MEROPS score threshold (-23.76)	79	80.99		Ctsb
LGDPAGGSTPPARQ	Q9MZL7	532	545	C-terminus	Ctsb (P00787; CATB_RAT). CTSB (P07858; CATB_HUMAN). Ctsb (P10605; CATB_MOUSE)	PARQGSWE	MEROPS:C01.060	Endopeptidase (input)	-23.54	MEROPS score threshold (-23.76)	79	80.99		Ctsb
SLSPGAASSSSGDGDGKEG	A4FV57	133	151	N-terminus	Casp1 (P29452; CASP1_MOUSE). CASP1 (P29466; CASP1_HUMAN). Casp1 (P43527; CASP1_RAT)	DETRSLSP	MEROPS:C14.001	Endopeptidase (input)	-19.01	MEROPS score threshold (-22.04)	95	96.19		Casp1
MWRGSSAGGSQGAAME	A1L515	1	16	C-terminus	Casp1 (P29452; CASP1_MOUSE). CASP1 (P29466; CASP1_HUMAN). Casp1 (P43527; CASP1_RAT)	AAMEGTGG	MEROPS:C14.001	Endopeptidase (input)	-21.99	MEROPS score threshold (-22.04)	95	96.19		Casp1
GGLGERVLGFCQLNLPSAK	A2VDL6	543	561	N-terminus	Casp1 (P29452; CASP1_MOUSE). CASP1 (P29466; CASP1_HUMAN). Casp1 (P43527; CASP1_RAT)	YLELGGLG	MEROPS:C14.001	Endopeptidase (input)	-20.78	MEROPS score threshold (-22.04)	95	96.19		Casp1
GLRGCVMHVN	A2VDT9	102	111	N-terminus	Casp1 (P29452; CASP1_MOUSE). CASP1 (P29466; CASP1_HUMAN). Casp1 (P43527; CASP1_RAT)	TEPCGLRG	MEROPS:C14.001	Endopeptidase (input)	-21.83	MEROPS score threshold (-22.04)	95	96.19		Casp1
TVPMTGTKSGNE	A4IFA3	584	595	N-terminus	Casp1 (P29452; CASP1_MOUSE). CASP1 (P29466; CASP1_HUMAN). Casp1 (P43527; CASP1_RAT)	ELLDTVPM	MEROPS:C14.001	Endopeptidase (input)	-18.84	MEROPS score threshold (-22.04)	95	96.19		Casp1
TVPMTGTKSGNE	A4IFA3	584	595	N-terminus	CASP3 (P42574; CASP3_HUMAN). Casp3 (P55213; CASP3_RAT). Casp3 (P70677; CASP3_MOUSE)	ELLDTVPM	MEROPS:C14.003	Endopeptidase (input)	-19.56	MEROPS score threshold (-19.97)	73	99.25		CASP3
VAPGPGLAPPAQPGAP	A2VE44	350	365	N-terminus	Casp1 (P29452; CASP1_MOUSE). CASP1 (P29466; CASP1_HUMAN). Casp1 (P43527; CASP1_RAT)	LVSTVAPG	MEROPS:C14.001	Endopeptidase (input)	-19.84	MEROPS score threshold (-22.04)	95	96.19		Casp1
GDRTSTFCGTPEFLAPE	A1A4I4	771	787	C-terminus	Casp1 (P29452; CASP1_MOUSE). CASP1 (P29466; CASP1_HUMAN). Casp1 (P43527; CASP1_RAT)	LAPEVLTD	MEROPS:C14.001	Endopeptidase (input)	-21.61	MEROPS score threshold (-22.04)	95	96.19		Casp1
AAAEAASSSMTKGKE	A6QP11	108	122	N-terminus	Casp1 (P29452; CASP1_MOUSE). CASP1 (P29466; CASP1_HUMAN). Casp1 (P43527; CASP1_RAT)	SESGAAAE	MEROPS:C14.001	Endopeptidase (input)	-21.38	MEROPS score threshold (-22.04)	95	96.19		Casp1
SVPESWAKFTDDNILRSQS	A6H782	295	313	N-terminus	Casp1 (P29452; CASP1_MOUSE). CASP1 (P29466; CASP1_HUMAN). Casp1 (P43527; CASP1_RAT)	DATVSVPE	MEROPS:C14.001	Endopeptidase (input)	-20.45	MEROPS score threshold (-22.04)	95	96.19		Casp1
VKCSGTELSLAHCRHD	A6H737	509	524	C-terminus	Casp1 (P29452; CASP1_MOUSE). CASP1 (P29466; CASP1_HUMAN). Casp1 (P43527; CASP1_RAT)	CRHDGEDV	MEROPS:C14.001	Endopeptidase (input)	-20.69	MEROPS score threshold (-22.04)	95	96.19		Casp1
GFPSPNQSSRA	A5D7F6	1058	1068	N-terminus	Casp1 (P29452; CASP1_MOUSE). CASP1 (P29466; CASP1_HUMAN). Casp1 (P43527; CASP1_RAT)	LAAGGFPS	MEROPS:C14.001	Endopeptidase (input)	-20.34	MEROPS score threshold (-22.04)	95	96.19		Casp1
QWLPRLHALVV	E1BNQ4	122	132	C-terminus	Casp1 (P29452; CASP1_MOUSE). CASP1 (P29466; CASP1_HUMAN). Casp1 (P43527; CASP1_RAT)	ALVVGPGL	MEROPS:C14.001	Endopeptidase (input)	-19.69	MEROPS score threshold (-22.04)	95	96.19		Casp1
PDPSSPGVSAAVPAPP	E1BP74	1685	1700	C-terminus	Casp1 (P29452; CASP1_MOUSE). CASP1 (P29466; CASP1_HUMAN). Casp1 (P43527; CASP1_RAT)	PAPPSPSS	MEROPS:C14.001	Endopeptidase (input)	-21.73	MEROPS score threshold (-22.04)	95	96.19		Casp1
RSEPPSATPSPALSVESL	E1BBG2	487	504	C-terminus	Casp1 (P29452; CASP1_MOUSE). CASP1 (P29466; CASP1_HUMAN). Casp1 (P43527; CASP1_RAT)	VESLSSES	MEROPS:C14.001	Endopeptidase (input)	-21.61	MEROPS score threshold (-22.04)	95	96.19		Casp1
SGPSSGPQMSSGPGGAPLD	A7Z019	137	155	N-terminus	Casp1 (P29452; CASP1_MOUSE). CASP1 (P29466; CASP1_HUMAN). Casp1 (P43527; CASP1_RAT)	PVPASGPS	MEROPS:C14.001	Endopeptidase (input)	-21.97	MEROPS score threshold (-22.04)	95	96.19		Casp1
SGPSSGPQMSSGPGGAPLD	A7Z019	137	155	C-terminus	Casp1 (P29452; CASP1_MOUSE). CASP1 (P29466; CASP1_HUMAN). Casp1 (P43527; CASP1_RAT)	APLDGADP	MEROPS:C14.001	Endopeptidase (input)	-19.52	MEROPS score threshold (-22.04)	95	96.19		Casp1
SGPSSGPQMSSGPGGAPLD	A7Z019	137	155	C-terminus	CASP3 (P42574; CASP3_HUMAN). Casp3 (P55213; CASP3_RAT). Casp3 (P70677; CASP3_MOUSE)	APLDGADP	MEROPS:C14.003	Endopeptidase (input)	-19.19	MEROPS score threshold (-19.97)	73	99.25		CASP3
SGPSSGPQMSSGPGGAPLD	A7Z019	137	155	C-terminus	Casp6 (O08738; CASP6_MOUSE). Casp6 (O35397; CASP6_RAT). CASP6 (P55212; CASP6_HUMAN)	APLDGADP	MEROPS:C14.005	Endopeptidase (input)	-18.41	MEROPS score threshold (-19.65)	66	99.48		Casp6
SQAFGTVHVYPDKMM	A7YY53	306	320	N-terminus	Casp1 (P29452; CASP1_MOUSE). CASP1 (P29466; CASP1_HUMAN). Casp1 (P43527; CASP1_RAT)	TAPDSQAF	MEROPS:C14.001	Endopeptidase (input)	-19.12	MEROPS score threshold (-22.04)	95	96.19		Casp1
SQAFGTVHVYPDKMM	A7YY53	306	320	N-terminus	CASP3 (P42574; CASP3_HUMAN). Casp3 (P55213; CASP3_RAT). Casp3 (P70677; CASP3_MOUSE)	TAPDSQAF	MEROPS:C14.003	Endopeptidase (input)	-18.56	MEROPS score threshold (-19.97)	73	99.25		CASP3
SQAFGTVHVYPDKMM	A7YY53	306	320	N-terminus	CASP7 (P55210; CASP7_HUMAN). Casp7 (P97864; CASP7_MOUSE)	TAPDSQAF	MEROPS:C14.004	Endopeptidase (input)	-18.57	MEROPS score threshold (-19.92)	42	99.55		CASP7
AAEKKDSGPYKM	P01190	210	221	N-terminus	Casp1 (P29452; CASP1_MOUSE). CASP1 (P29466; CASP1_HUMAN). Casp1 (P43527; CASP1_RAT)	AEAEAAEK	MEROPS:C14.001	Endopeptidase (input)	-21.34	MEROPS score threshold (-22.04)	95	96.19		Casp1
NSGGGGAAGGGPGERKRT	O46606	129	146	N-terminus	Casp1 (P29452; CASP1_MOUSE). CASP1 (P29466; CASP1_HUMAN). Casp1 (P43527; CASP1_RAT)	LVPSNSGG	MEROPS:C14.001	Endopeptidase (input)	-21.72	MEROPS score threshold (-22.04)	95	96.19		Casp1
GVPGVGVPGVGVPGVG	P04985	338	353	N-terminus	Casp1 (P29452; CASP1_MOUSE). CASP1 (P29466; CASP1_HUMAN). Casp1 (P43527; CASP1_RAT)	LPGVGVPG	MEROPS:C14.001	Endopeptidase (input)	-21.59	MEROPS score threshold (-22.04)	95	96.19		Casp1
NPGPPGSSGAPGKD	P04258	733	746	C-terminus	Casp1 (P29452; CASP1_MOUSE). CASP1 (P29466; CASP1_HUMAN). Casp1 (P43527; CASP1_RAT)	PGKDGPPG	MEROPS:C14.001	Endopeptidase (input)	-19.12	MEROPS score threshold (-22.04)	95	96.19		Casp1
RGSLESTLAHGLKNGMK	P17810	123	139	N-terminus	Casp1 (P29452; CASP1_MOUSE). CASP1 (P29466; CASP1_HUMAN). Casp1 (P43527; CASP1_RAT)	FLLRGSLE	MEROPS:C14.001	Endopeptidase (input)	-21.63	MEROPS score threshold (-22.04)	95	96.19		Casp1
LPGGFPGGAMPSQYPGGQS	P20072	119	137	N-terminus	Casp1 (P29452; CASP1_MOUSE). CASP1 (P29466; CASP1_HUMAN). Casp1 (P43527; CASP1_RAT)	AQVPLPGG	MEROPS:C14.001	Endopeptidase (input)	-21.83	MEROPS score threshold (-22.04)	95	96.19		Casp1
DPPTVELQGLVPRG	P12260	26	39	N-terminus	Lgmn (O89017; LGMN_MOUSE). LGMN (Q99538; LGMN_HUMAN). Lgmn (Q9R0J8; LGMN_RAT)	AAENDPPT	MEROPS:C13.004	Endopeptidase (input)	-18.76	99th percentile (-19.19)	33	99.73		Lgmn
MKIYSQKTMANACTLVMC	P35246	23	40	C-terminus	Casp1 (P29452; CASP1_MOUSE). CASP1 (P29466; CASP1_HUMAN). Casp1 (P43527; CASP1_RAT)	LVMCSPPE	MEROPS:C14.001	Endopeptidase (input)	-20.89	MEROPS score threshold (-22.04)	95	96.19		Casp1
SVLPSGEGHLETSS	P13608	1249	1262	C-terminus	Casp1 (P29452; CASP1_MOUSE). CASP1 (P29466; CASP1_HUMAN). Casp1 (P43527; CASP1_RAT)	ETSSGVED	MEROPS:C14.001	Endopeptidase (input)	-20.81	MEROPS score threshold (-22.04)	95	96.19		Casp1
LQPLVLALLVLACC	P52176	4	17	C-terminus	Casp1 (P29452; CASP1_MOUSE). CASP1 (P29466; CASP1_HUMAN). Casp1 (P43527; CASP1_RAT)	LACCSAVP	MEROPS:C14.001	Endopeptidase (input)	-22.03	MEROPS score threshold (-22.04)	95	96.19		Casp1
NETMIPVLTSKKASELPV	P57709	48	65	C-terminus	Casp1 (P29452; CASP1_MOUSE). CASP1 (P29466; CASP1_HUMAN). Casp1 (P43527; CASP1_RAT)	ELPVSEVA	MEROPS:C14.001	Endopeptidase (input)	-20.07	MEROPS score threshold (-22.04)	95	96.19		Casp1
LGHGGLTAFSSSS	Q0III6	167	179	C-terminus	Casp1 (P29452; CASP1_MOUSE). CASP1 (P29466; CASP1_HUMAN). Casp1 (P43527; CASP1_RAT)	SSSSAFGG	MEROPS:C14.001	Endopeptidase (input)	-20.72	MEROPS score threshold (-22.04)	95	96.19		Casp1
TRAAGTTAPVVTPAAD	P55203	160	175	C-terminus	Casp1 (P29452; CASP1_MOUSE). CASP1 (P29466; CASP1_HUMAN). Casp1 (P43527; CASP1_RAT)	PAADALYA	MEROPS:C14.001	Endopeptidase (input)	-21.67	MEROPS score threshold (-22.04)	95	96.19		Casp1
RLRELGPDGEEAEGPGAGD	Q0V898	142	160	C-terminus	Casp1 (P29452; CASP1_MOUSE). CASP1 (P29466; CASP1_HUMAN). Casp1 (P43527; CASP1_RAT)	GAGDGPPR	MEROPS:C14.001	Endopeptidase (input)	-20.02	MEROPS score threshold (-22.04)	95	96.19		Casp1
VTAEEAAGASPAKVNGQE	Q0VBZ9	13	30	N-terminus	Casp1 (P29452; CASP1_MOUSE). CASP1 (P29466; CASP1_HUMAN). Casp1 (P43527; CASP1_RAT)	PRGDVTAE	MEROPS:C14.001	Endopeptidase (input)	-21.49	MEROPS score threshold (-22.04)	95	96.19		Casp1
GVLLGAVIFGYLSD	Q17QN9	164	177	C-terminus	Casp1 (P29452; CASP1_MOUSE). CASP1 (P29466; CASP1_HUMAN). Casp1 (P43527; CASP1_RAT)	YLSDRAGR	MEROPS:C14.001	Endopeptidase (input)	-19.98	MEROPS score threshold (-22.04)	95	96.19		Casp1
GTKAGVEAAGTGCCMC	Q1JQA4	276	291	N-terminus	Casp1 (P29452; CASP1_MOUSE). CASP1 (P29466; CASP1_HUMAN). Casp1 (P43527; CASP1_RAT)	LLGPGTKA	MEROPS:C14.001	Endopeptidase (input)	-21.6	MEROPS score threshold (-22.04)	95	96.19		Casp1
SRGDVGAWVREAAM	Q28205	871	884	N-terminus	Casp1 (P29452; CASP1_MOUSE). CASP1 (P29466; CASP1_HUMAN). Casp1 (P43527; CASP1_RAT)	YTTDSRGD	MEROPS:C14.001	Endopeptidase (input)	-19.24	MEROPS score threshold (-22.04)	95	96.19		Casp1
DLAHTTLAYGLSQD	Q2T9M1	363	376	C-terminus	Casp1 (P29452; CASP1_MOUSE). CASP1 (P29466; CASP1_HUMAN). Casp1 (P43527; CASP1_RAT)	LSQDEFTD	MEROPS:C14.001	Endopeptidase (input)	-19.62	MEROPS score threshold (-22.04)	95	96.19		Casp1
AVGGSGSGSTSGCGSAS	Q2T9W9	31	47	N-terminus	Casp1 (P29452; CASP1_MOUSE). CASP1 (P29466; CASP1_HUMAN). Casp1 (P43527; CASP1_RAT)	DLVPAVGG	MEROPS:C14.001	Endopeptidase (input)	-18.85	MEROPS score threshold (-22.04)	95	96.19		Casp1
GEGGRKNSSNFKK	Q32PJ8	427	439	N-terminus	Casp1 (P29452; CASP1_MOUSE). CASP1 (P29466; CASP1_HUMAN). Casp1 (P43527; CASP1_RAT)	SDEEGEGG	MEROPS:C14.001	Endopeptidase (input)	-20.62	MEROPS score threshold (-22.04)	95	96.19		Casp1
PSIGFMNKIFHPNID	Q32LN1	66	80	C-terminus	Casp1 (P29452; CASP1_MOUSE). CASP1 (P29466; CASP1_HUMAN). Casp1 (P43527; CASP1_RAT)	PNIDEASG	MEROPS:C14.001	Endopeptidase (input)	-21.39	MEROPS score threshold (-22.04)	95	96.19		Casp1
GLSAPGLSVLE	Q32PG9	239	249	N-terminus	Casp1 (P29452; CASP1_MOUSE). CASP1 (P29466; CASP1_HUMAN). Casp1 (P43527; CASP1_RAT)	LTVRGLSA	MEROPS:C14.001	Endopeptidase (input)	-20.13	MEROPS score threshold (-22.04)	95	96.19		Casp1
GLSAPGLSVLE	Q32PG9	239	249	C-terminus	Casp1 (P29452; CASP1_MOUSE). CASP1 (P29466; CASP1_HUMAN). Casp1 (P43527; CASP1_RAT)	SVLEGMPA	MEROPS:C14.001	Endopeptidase (input)	-21.61	MEROPS score threshold (-22.04)	95	96.19		Casp1
GAGERPLRLNAAAR	Q3T0E1	47	60	N-terminus	Casp1 (P29452; CASP1_MOUSE). CASP1 (P29466; CASP1_HUMAN). Casp1 (P43527; CASP1_RAT)	DGPGGAGE	MEROPS:C14.001	Endopeptidase (input)	-21.43	MEROPS score threshold (-22.04)	95	96.19		Casp1
GSGPDGPLGVEQSGKTDQ	Q3MHH2	16	33	N-terminus	Casp1 (P29452; CASP1_MOUSE). CASP1 (P29466; CASP1_HUMAN). Casp1 (P43527; CASP1_RAT)	AVPLGSGP	MEROPS:C14.001	Endopeptidase (input)	-21.35	MEROPS score threshold (-22.04)	95	96.19		Casp1
GYGDVGKGCAQALR	Q3MHL4	220	233	N-terminus	Casp1 (P29452; CASP1_MOUSE). CASP1 (P29466; CASP1_HUMAN). Casp1 (P43527; CASP1_RAT)	AVVAGYGD	MEROPS:C14.001	Endopeptidase (input)	-21.14	MEROPS score threshold (-22.04)	95	96.19		Casp1
SAADAQAIADMAAYQLEL	Q3SZC2	68	85	N-terminus	Casp1 (P29452; CASP1_MOUSE). CASP1 (P29466; CASP1_HUMAN). Casp1 (P43527; CASP1_RAT)	ALSGSAAD	MEROPS:C14.001	Endopeptidase (input)	-20.28	MEROPS score threshold (-22.04)	95	96.19		Casp1
LASGEGAAAGLPALD	Q3SX44	23	37	C-terminus	Casp1 (P29452; CASP1_MOUSE). CASP1 (P29466; CASP1_HUMAN). Casp1 (P43527; CASP1_RAT)	PALDLAKA	MEROPS:C14.001	Endopeptidase (input)	-21.25	MEROPS score threshold (-22.04)	95	96.19		Casp1
LASGEGAAAGLPALD	Q3SX44	23	37	C-terminus	CASP7 (P55210; CASP7_HUMAN). Casp7 (P97864; CASP7_MOUSE)	PALDLAKA	MEROPS:C14.004	Endopeptidase (input)	-18.89	MEROPS score threshold (-19.92)	42	99.55		CASP7
GPCSAGAPALGGRREPKK	Q3SYZ2	21	38	N-terminus	Casp1 (P29452; CASP1_MOUSE). CASP1 (P29466; CASP1_HUMAN). Casp1 (P43527; CASP1_RAT)	GVPCGPCS	MEROPS:C14.001	Endopeptidase (input)	-21.89	MEROPS score threshold (-22.04)	95	96.19		Casp1
LLLQDFSRNLSAKSSAL	Q3SZ87	15	31	N-terminus	Casp1 (P29452; CASP1_MOUSE). CASP1 (P29466; CASP1_HUMAN). Casp1 (P43527; CASP1_RAT)	SEEDLLLQ	MEROPS:C14.001	Endopeptidase (input)	-19.53	MEROPS score threshold (-22.04)	95	96.19		Casp1
LLLQDFSRNLSAKSSAL	Q3SZ87	15	31	N-terminus	CASP3 (P42574; CASP3_HUMAN). Casp3 (P55213; CASP3_RAT). Casp3 (P70677; CASP3_MOUSE)	SEEDLLLQ	MEROPS:C14.003	Endopeptidase (input)	-18.51	MEROPS score threshold (-19.97)	73	99.25		CASP3
LLLQDFSRNLSAKSSAL	Q3SZ87	15	31	N-terminus	CASP7 (P55210; CASP7_HUMAN). Casp7 (P97864; CASP7_MOUSE)	SEEDLLLQ	MEROPS:C14.004	Endopeptidase (input)	-17.9	MEROPS score threshold (-19.92)	42	99.55		CASP7
LLLQDFSRNLSAKSSAL	Q3SZ87	15	31	N-terminus	Casp6 (O08738; CASP6_MOUSE). Casp6 (O35397; CASP6_RAT). CASP6 (P55212; CASP6_HUMAN)	SEEDLLLQ	MEROPS:C14.005	Endopeptidase (input)	-17.75	MEROPS score threshold (-19.65)	66	99.48		Casp6
ASEGGAEDGASGVGGSA	Q59HJ6	86	102	N-terminus	Casp1 (P29452; CASP1_MOUSE). CASP1 (P29466; CASP1_HUMAN). Casp1 (P43527; CASP1_RAT)	GGEDASEG	MEROPS:C14.001	Endopeptidase (input)	-21.73	MEROPS score threshold (-22.04)	95	96.19		Casp1
ASEGGAEDGASGVGGSA	Q59HJ6	86	102	N-terminus	CASP3 (P42574; CASP3_HUMAN). Casp3 (P55213; CASP3_RAT). Casp3 (P70677; CASP3_MOUSE)	GGEDASEG	MEROPS:C14.003	Endopeptidase (input)	-19.36	MEROPS score threshold (-19.97)	73	99.25		CASP3
ASEGGAEDGASGVGGSA	Q59HJ6	86	102	N-terminus	Casp6 (O08738; CASP6_MOUSE). Casp6 (O35397; CASP6_RAT). CASP6 (P55212; CASP6_HUMAN)	GGEDASEG	MEROPS:C14.005	Endopeptidase (input)	-19.06	MEROPS score threshold (-19.65)	66	99.48		Casp6
EPLGAMAASEDEEE	Q58CS7	192	205	C-terminus	Casp1 (P29452; CASP1_MOUSE). CASP1 (P29466; CASP1_HUMAN). Casp1 (P43527; CASP1_RAT)	DEEEEEEA	MEROPS:C14.001	Endopeptidase (input)	-22	MEROPS score threshold (-22.04)	95	96.19		Casp1
AFVGLKRAFRKAPLLY	Q52QI2	838	853	N-terminus	Casp1 (P29452; CASP1_MOUSE). CASP1 (P29466; CASP1_HUMAN). Casp1 (P43527; CASP1_RAT)	EEQEAFVG	MEROPS:C14.001	Endopeptidase (input)	-20.01	MEROPS score threshold (-22.04)	95	96.19		Casp1
KYWSFSISPSHEY	Q58CX2	476	488	C-terminus	Casp1 (P29452; CASP1_MOUSE). CASP1 (P29466; CASP1_HUMAN). Casp1 (P43527; CASP1_RAT)	LDRLSLAQ	MEROPS:C14.001	Endopeptidase (input)	-21.91	MEROPS score threshold (-22.04)	95	96.19		Casp1
GPVVIGFTSAPGQGGILAQ	Q5E9E4	118	136	N-terminus	Casp1 (P29452; CASP1_MOUSE). CASP1 (P29466; CASP1_HUMAN). Casp1 (P43527; CASP1_RAT)	AQEDGPVV	MEROPS:C14.001	Endopeptidase (input)	-17.64	MEROPS score threshold (-22.04)	95	96.19		Casp1
GPVVIGFTSAPGQGGILAQ	Q5E9E4	118	136	N-terminus	CASP3 (P42574; CASP3_HUMAN). Casp3 (P55213; CASP3_RAT). Casp3 (P70677; CASP3_MOUSE)	AQEDGPVV	MEROPS:C14.003	Endopeptidase (input)	-18.43	MEROPS score threshold (-19.97)	73	99.25		CASP3
GPVVIGFTSAPGQGGILAQ	Q5E9E4	118	136	N-terminus	CASP7 (P55210; CASP7_HUMAN). Casp7 (P97864; CASP7_MOUSE)	AQEDGPVV	MEROPS:C14.004	Endopeptidase (input)	-17.06	MEROPS score threshold (-19.92)	42	99.55		CASP7
GPVVIGFTSAPGQGGILAQ	Q5E9E4	118	136	N-terminus	Casp6 (O08738; CASP6_MOUSE). Casp6 (O35397; CASP6_RAT). CASP6 (P55212; CASP6_HUMAN)	AQEDGPVV	MEROPS:C14.005	Endopeptidase (input)	-19.15	MEROPS score threshold (-19.65)	66	99.48		Casp6
MAPGPGLWQSEGTS	Q95141	388	401	N-terminus	Casp1 (P29452; CASP1_MOUSE). CASP1 (P29466; CASP1_HUMAN). Casp1 (P43527; CASP1_RAT)	AETPMAPG	MEROPS:C14.001	Endopeptidase (input)	-21.07	MEROPS score threshold (-22.04)	95	96.19		Casp1
GFKVSSASGKTSSSKQQ	Q9TTK4	2707	2723	N-terminus	Casp1 (P29452; CASP1_MOUSE). CASP1 (P29466; CASP1_HUMAN). Casp1 (P43527; CASP1_RAT)	YLVEGFKV	MEROPS:C14.001	Endopeptidase (input)	-19.25	MEROPS score threshold (-22.04)	95	96.19		Casp1
SGPSSGPQMSSGPGGAPLD	A7Z019	137	155	C-terminus	Casp2 (P29594; CASP2_MOUSE). CASP2 (P42575; CASP2_HUMAN). Casp2 (P55215; CASP2_RAT)	APLDGADP	MEROPS:C14.006	Endopeptidase (input)	-17.27	MEROPS score threshold (-19.18)	58	99.73		Casp2
GPVVIGFTSAPGQGGILAQ	Q5E9E4	118	136	N-terminus	Casp8 (O89110; CASP8_MOUSE). CASP8 (Q14790; CASP8_HUMAN). Casp8 (Q9JHX4; CASP8_RAT)	AQEDGPVV	MEROPS:C14.009	Endopeptidase (input)	-16.25	MEROPS score threshold (-19.04)	38	99.69		Casp8
LGSRPLSTAMPPPPG	A1A4J8	62	76	C-terminus	MMP1 (P03956; MMP1_HUMAN)	PPPGSSGP	MEROPS:M10.001	Endopeptidase (input)	-19.11	99th percentile (-19.87)	31	98.45		MMP1
SLSPGAASSSSGDGDGKEG	A4FV57	133	151	C-terminus	MMP1 (P03956; MMP1_HUMAN)	GKEGLEEP	MEROPS:M10.001	Endopeptidase (input)	-18.62	99th percentile (-19.87)	31	98.45		MMP1
AILNVGAPAAG	A1A4J1	403	413	N-terminus	Thop1 (P24155; THOP1_RAT). THOP1 (P52888; THOP1_HUMAN). Thop1 (Q8C1A5; THOP1_MOUSE)	NFSLAILN	MEROPS:M03.001	Endopeptidase (input)	-19.98	99th percentile (-22)	17	99.69		Thop1
AILNVGAPAAG	A1A4J1	403	413	N-terminus	Nln (P42676; NEUL_RAT). Nln (Q91YP2; NEUL_MOUSE). NLN (Q9BYT8; NEUL_HUMAN)	NFSLAILN	MEROPS:M03.002	Endopeptidase (input)	-20.22	99th percentile (-21.34)	13	99.88		Nln
AILNVGAPAAG	A1A4J1	403	413	C-terminus	MMP1 (P03956; MMP1_HUMAN)	PAAGMNAA	MEROPS:M10.001	Endopeptidase (input)	-19.02	99th percentile (-19.87)	31	98.45		MMP1
SRSTSTGSAASSGSNSS	A5D992	112	128	N-terminus	Thop1 (P24155; THOP1_RAT). THOP1 (P52888; THOP1_HUMAN). Thop1 (Q8C1A5; THOP1_MOUSE)	GPILSRST	MEROPS:M03.001	Endopeptidase (input)	-21.72	99th percentile (-22)	17	99.69		Thop1
LSAATTFEPLEPVKDTD	A5PJZ5	81	97	N-terminus	MMP1 (P03956; MMP1_HUMAN)	RLESLSAA	MEROPS:M10.001	Endopeptidase (input)	-18.76	99th percentile (-19.87)	31	98.45		MMP1
LVRGDAAGSAG	A7MB34	193	203	N-terminus	MMP1 (P03956; MMP1_HUMAN)	PAAGLVRG	MEROPS:M10.001	Endopeptidase (input)	-18.99	99th percentile (-19.87)	31	98.45		MMP1
SGAPPASGHSHRP	A7YWM1	88	100	N-terminus	MMP1 (P03956; MMP1_HUMAN)	GALGSGAP	MEROPS:M10.001	Endopeptidase (input)	-17.5	99th percentile (-19.87)	31	98.45		MMP1
EALQGFARSVAAARGPAA	A7YY73	112	129	C-terminus	MMP1 (P03956; MMP1_HUMAN)	GPAALVAP	MEROPS:M10.001	Endopeptidase (input)	-14.82	99th percentile (-19.87)	31	98.45		MMP1
LPFLPGTSPSADGPDSFS	F1MUS9	388	405	N-terminus	Nln (P42676; NEUL_RAT). Nln (Q91YP2; NEUL_MOUSE). NLN (Q9BYT8; NEUL_HUMAN)	LKSPLPFL	MEROPS:M03.002	Endopeptidase (input)	-20.24	99th percentile (-21.34)	13	99.88		Nln
PDPSSPGVSAAVPAPP	E1BP74	1685	1700	C-terminus	Thop1 (P24155; THOP1_RAT). THOP1 (P52888; THOP1_HUMAN). Thop1 (Q8C1A5; THOP1_MOUSE)	PAPPSPSS	MEROPS:M03.001	Endopeptidase (input)	-21.29	99th percentile (-22)	17	99.69		Thop1
PDPSSPGVSAAVPAPP	E1BP74	1685	1700	C-terminus	Nln (P42676; NEUL_RAT). Nln (Q91YP2; NEUL_MOUSE). NLN (Q9BYT8; NEUL_HUMAN)	PAPPSPSS	MEROPS:M03.002	Endopeptidase (input)	-20.65	99th percentile (-21.34)	13	99.88		Nln
GPGPSPGAMLGPSPGP	A7Z019	19	34	N-terminus	Thop1 (P24155; THOP1_RAT). THOP1 (P52888; THOP1_HUMAN). Thop1 (Q8C1A5; THOP1_MOUSE)	GPSPGPGP	MEROPS:M03.001	Endopeptidase (input)	-19.3	99th percentile (-22)	17	99.69		Thop1
GLPGVGVPGVGVPGVGVPG	P04985	333	351	C-terminus	MMP1 (P03956; MMP1_HUMAN)	GVPGVGVP	MEROPS:M10.001	Endopeptidase (input)	-19.65	99th percentile (-19.87)	31	98.45		MMP1
AAAAAGAGGEMAFAKG	P09851	100	115	N-terminus	MMP1 (P03956; MMP1_HUMAN)	VAGVAAAA	MEROPS:M10.001	Endopeptidase (input)	-19.47	99th percentile (-19.87)	31	98.45		MMP1
LSAGGAAAGVAGVAAA	P09851	87	102	N-terminus	MMP1 (P03956; MMP1_HUMAN)	GGVGLSAG	MEROPS:M10.001	Endopeptidase (input)	-17.68	99th percentile (-19.87)	31	98.45		MMP1
LSAGGAAAGVAGVAAA	P09851	87	102	C-terminus	MMP1 (P03956; MMP1_HUMAN)	VAAAAAGA	MEROPS:M10.001	Endopeptidase (input)	-17.85	99th percentile (-19.87)	31	98.45		MMP1
EKGAPGADGPAGAPGTP	P02453	932	948	N-terminus	MMP1 (P03956; MMP1_HUMAN)	GPAGEKGA	MEROPS:M10.001	Endopeptidase (input)	-17	99th percentile (-19.87)	31	98.45		MMP1
EKGAPGADGPAGAPGTP	P02453	932	948	C-terminus	Thop1 (P24155; THOP1_RAT). THOP1 (P52888; THOP1_HUMAN). Thop1 (Q8C1A5; THOP1_MOUSE)	PGTPGPQG	MEROPS:M03.001	Endopeptidase (input)	-21.39	99th percentile (-22)	17	99.69		Thop1
PAGPIGPVGARGPAGPQG	P02453	1073	1090	N-terminus	MMP1 (P03956; MMP1_HUMAN)	GPAGPAGP	MEROPS:M10.001	Endopeptidase (input)	-16.95	99th percentile (-19.87)	31	98.45		MMP1
PAGPIGPVGARGPAGPQG	P02453	1073	1090	C-terminus	MMP1 (P03956; MMP1_HUMAN)	GPQGPRGD	MEROPS:M10.001	Endopeptidase (input)	-17.4	99th percentile (-19.87)	31	98.45		MMP1
PVGPTGPVGAAG	P02465	750	761	C-terminus	MMP1 (P03956; MMP1_HUMAN)	GAAGPSGP	MEROPS:M10.001	Endopeptidase (input)	-17.57	99th percentile (-19.87)	31	98.45		MMP1
HPGKPGRPGERGVVGPQG	P02465	144	161	C-terminus	MMP1 (P03956; MMP1_HUMAN)	GPQGARGF	MEROPS:M10.001	Endopeptidase (input)	-16.3	99th percentile (-19.87)	31	98.45		MMP1
PLGIAGLTGARGLAGPPGM	P04258	790	808	N-terminus	MMP1 (P03956; MMP1_HUMAN)	GAPGPLGI	MEROPS:M10.001	Endopeptidase (input)	-18.67	99th percentile (-19.87)	31	98.45		MMP1
SVVVGPSVVAV	P12763	290	300	N-terminus	MMP1 (P03956; MMP1_HUMAN)	PPVASVVV	MEROPS:M10.001	Endopeptidase (input)	-19.74	99th percentile (-19.87)	31	98.45		MMP1
VMRPEMIMKSIIPVV	P23956	46	60	C-terminus	MMP1 (P03956; MMP1_HUMAN)	IPVVMAGI	MEROPS:M10.001	Endopeptidase (input)	-19.69	99th percentile (-19.87)	31	98.45		MMP1
LGLLSGPRSAH	P30404	12	22	N-terminus	MMP1 (P03956; MMP1_HUMAN)	GPRLLGLL	MEROPS:M10.001	Endopeptidase (input)	-19.2	99th percentile (-19.87)	31	98.45		MMP1
PALEPPTLPLHHA	P23726	204	216	N-terminus	MMP1 (P03956; MMP1_HUMAN)	GPVGPALE	MEROPS:M10.001	Endopeptidase (input)	-18.94	99th percentile (-19.87)	31	98.45		MMP1
PGGMPGGMPGGFPGGGAPP	P19120	618	636	C-terminus	Thop1 (P24155; THOP1_RAT). THOP1 (P52888; THOP1_HUMAN). Thop1 (Q8C1A5; THOP1_MOUSE)	GAPPSGGA	MEROPS:M03.001	Endopeptidase (input)	-21.06	99th percentile (-22)	17	99.69		Thop1
MAVRNNLAGAE	P49951	351	361	N-terminus	MMP1 (P03956; MMP1_HUMAN)	LALRMAVR	MEROPS:M10.001	Endopeptidase (input)	-19.75	99th percentile (-19.87)	31	98.45		MMP1
LPGPSGNMGPQGPKGIP	P23206	336	352	N-terminus	MMP1 (P03956; MMP1_HUMAN)	GEAGLPGP	MEROPS:M10.001	Endopeptidase (input)	-19.67	99th percentile (-19.87)	31	98.45		MMP1
PTGPPGPPGPRGNAGE	P23206	488	503	N-terminus	MMP1 (P03956; MMP1_HUMAN)	GLNGPTGP	MEROPS:M10.001	Endopeptidase (input)	-19.77	99th percentile (-19.87)	31	98.45		MMP1
LDLQVISPQPRSIGLIAG	Q08DK1	228	245	C-terminus	MMP1 (P03956; MMP1_HUMAN)	LIAGAIGT	MEROPS:M10.001	Endopeptidase (input)	-19.55	99th percentile (-19.87)	31	98.45		MMP1
DDFVSGVPRA	P80746	267	276	C-terminus	MMP1 (P03956; MMP1_HUMAN)	VPRAARTL	MEROPS:M10.001	Endopeptidase (input)	-19.24	99th percentile (-19.87)	31	98.45		MMP1
DVQYVTAGTGAVNV	P58353	313	326	C-terminus	MMP1 (P03956; MMP1_HUMAN)	AVNVLITV	MEROPS:M10.001	Endopeptidase (input)	-19.52	99th percentile (-19.87)	31	98.45		MMP1
KRASAKAGPHRTVPQR	Q17QP0	93	108	C-terminus	MMP1 (P03956; MMP1_HUMAN)	VPQRAAGR	MEROPS:M10.001	Endopeptidase (input)	-19.1	99th percentile (-19.87)	31	98.45		MMP1
RLRELGPDGEEAEGPGAGD	Q0V898	142	160	C-terminus	Thop1 (P24155; THOP1_RAT). THOP1 (P52888; THOP1_HUMAN). Thop1 (Q8C1A5; THOP1_MOUSE)	GAGDGPPR	MEROPS:M03.001	Endopeptidase (input)	-20.5	99th percentile (-22)	17	99.69		Thop1
REAEQLRFLFRKLASG	Q0V8C2	632	647	C-terminus	MMP1 (P03956; MMP1_HUMAN)	LASGFGEE	MEROPS:M10.001	Endopeptidase (input)	-19.37	99th percentile (-19.87)	31	98.45		MMP1
AAAAAAAGAAGGRGS	Q28165	5	19	C-terminus	Thop1 (P24155; THOP1_RAT). THOP1 (P52888; THOP1_HUMAN). Thop1 (Q8C1A5; THOP1_MOUSE)	GRGSGPGR	MEROPS:M03.001	Endopeptidase (input)	-21.55	99th percentile (-22)	17	99.69		Thop1
PGPMGLTGRPGPVGGPG	Q28083	298	314	C-terminus	MMP1 (P03956; MMP1_HUMAN)	GGPGSSGA	MEROPS:M10.001	Endopeptidase (input)	-19.52	99th percentile (-19.87)	31	98.45		MMP1
LVGVTAACTVRKRC	Q1RMT1	348	361	N-terminus	MMP1 (P03956; MMP1_HUMAN)	AGKSLVGV	MEROPS:M10.001	Endopeptidase (input)	-19.77	99th percentile (-19.87)	31	98.45		MMP1
AVATSKPGLRP	Q1LZG6	31	41	N-terminus	MMP1 (P03956; MMP1_HUMAN)	VPVAAVAT	MEROPS:M10.001	Endopeptidase (input)	-17.92	99th percentile (-19.87)	31	98.45		MMP1
LVEAIEIYPLAEAEGVQIS	Q29RK0	877	895	N-terminus	MMP1 (P03956; MMP1_HUMAN)	EALPLVEA	MEROPS:M10.001	Endopeptidase (input)	-18.1	99th percentile (-19.87)	31	98.45		MMP1
ASTFLSPAFPGSQT	Q2LGB3	139	152	N-terminus	MMP1 (P03956; MMP1_HUMAN)	LPSLASTF	MEROPS:M10.001	Endopeptidase (input)	-19.86	99th percentile (-19.87)	31	98.45		MMP1
LMLADNGVCC	Q2KIZ8	449	458	N-terminus	MMP1 (P03956; MMP1_HUMAN)	EAGALMLA	MEROPS:M10.001	Endopeptidase (input)	-18.68	99th percentile (-19.87)	31	98.45		MMP1
PPAPAPLEKPIVLMK	Q2YDD2	88	102	N-terminus	MMP1 (P03956; MMP1_HUMAN)	APAAPPAP	MEROPS:M10.001	Endopeptidase (input)	-19.42	99th percentile (-19.87)	31	98.45		MMP1
QCPPGGLPEK	Q2TBI8	10	19	C-terminus	MMP1 (P03956; MMP1_HUMAN)	LPEKQVRA	MEROPS:M10.001	Endopeptidase (input)	-19.53	99th percentile (-19.87)	31	98.45		MMP1
LRAEKERSLVDGKSQEKE	Q32KY1	567	584	N-terminus	MMP1 (P03956; MMP1_HUMAN)	EPLDLRAE	MEROPS:M10.001	Endopeptidase (input)	-16.87	99th percentile (-19.87)	31	98.45		MMP1
GAGERPLRLNAAAR	Q3T0E1	47	60	C-terminus	MMP1 (P03956; MMP1_HUMAN)	AAARSRGR	MEROPS:M10.001	Endopeptidase (input)	-19.44	99th percentile (-19.87)	31	98.45		MMP1
LASGEGAAAGLPALD	Q3SX44	23	37	N-terminus	MMP1 (P03956; MMP1_HUMAN)	VPESLASG	MEROPS:M10.001	Endopeptidase (input)	-18.93	99th percentile (-19.87)	31	98.45		MMP1
LASGEGAAAGLPALD	Q3SX44	23	37	C-terminus	MMP1 (P03956; MMP1_HUMAN)	PALDLAKA	MEROPS:M10.001	Endopeptidase (input)	-19.17	99th percentile (-19.87)	31	98.45		MMP1
SRVHAGSKAALA	Q3T005	30	41	C-terminus	MMP1 (P03956; MMP1_HUMAN)	AALAALCP	MEROPS:M10.001	Endopeptidase (input)	-18.98	99th percentile (-19.87)	31	98.45		MMP1
QLHTLDTDLHSLAQIGGKS	Q5BIM2	182	200	N-terminus	MMP1 (P03956; MMP1_HUMAN)	APPGQLHT	MEROPS:M10.001	Endopeptidase (input)	-19.44	99th percentile (-19.87)	31	98.45		MMP1
SMGYVQAMKPPGAQG	Q58CN7	56	70	C-terminus	MMP1 (P03956; MMP1_HUMAN)	GAQGSQST	MEROPS:M10.001	Endopeptidase (input)	-19.04	99th percentile (-19.87)	31	98.45		MMP1
AGPKGSTGAQG	Q5I2E5	87	97	C-terminus	MMP1 (P03956; MMP1_HUMAN)	GAQGEKGA	MEROPS:M10.001	Endopeptidase (input)	-17.11	99th percentile (-19.87)	31	98.45		MMP1
AAAAAAAGPGSPGAAAVVK	Q6VFT7	229	247	N-terminus	MMP1 (P03956; MMP1_HUMAN)	AAAAAAAA	MEROPS:M10.001	Endopeptidase (input)	-16.8	99th percentile (-19.87)	31	98.45		MMP1
FGSRSLYNLGGSKR	Q5XQN5	60	73	N-terminus	Thop1 (P24155; THOP1_RAT). THOP1 (P52888; THOP1_HUMAN). Thop1 (Q8C1A5; THOP1_MOUSE)	GAGGFGSR	MEROPS:M03.001	Endopeptidase (input)	-21.99	99th percentile (-22)	17	99.69		Thop1
GMGPDTAPQA	Q5E9V5	134	143	C-terminus	MMP1 (P03956; MMP1_HUMAN)	APQAQVRV	MEROPS:M10.001	Endopeptidase (input)	-18.69	99th percentile (-19.87)	31	98.45		MMP1
PASGLAALAKV	Q71SP7	334	344	C-terminus	MMP1 (P03956; MMP1_HUMAN)	LAKVLLSL	MEROPS:M10.001	Endopeptidase (input)	-19.19	99th percentile (-19.87)	31	98.45		MMP1
EGDTPQHLSPVQLLHQLQA	Q8MJ05	1074	1092	C-terminus	MMP1 (P03956; MMP1_HUMAN)	QLQALVPS	MEROPS:M10.001	Endopeptidase (input)	-19.56	99th percentile (-19.87)	31	98.45		MMP1
EPPMSGLPEF	Q9GLM4	690	699	C-terminus	MMP1 (P03956; MMP1_HUMAN)	LPEFPRAA	MEROPS:M10.001	Endopeptidase (input)	-18.3	99th percentile (-19.87)	31	98.45		MMP1
QPLAEPPMSGLPEF	Q9GLM4	686	699	N-terminus	Thop1 (P24155; THOP1_RAT). THOP1 (P52888; THOP1_HUMAN). Thop1 (Q8C1A5; THOP1_MOUSE)	RPSPQPLA	MEROPS:M03.001	Endopeptidase (input)	-19.97	99th percentile (-22)	17	99.69		Thop1
QPLAEPPMSGLPEF	Q9GLM4	686	699	N-terminus	Nln (P42676; NEUL_RAT). Nln (Q91YP2; NEUL_MOUSE). NLN (Q9BYT8; NEUL_HUMAN)	RPSPQPLA	MEROPS:M03.002	Endopeptidase (input)	-20.04	99th percentile (-21.34)	13	99.88		Nln
QPLAEPPMSGLPEF	Q9GLM4	686	699	C-terminus	MMP1 (P03956; MMP1_HUMAN)	LPEFPRAA	MEROPS:M10.001	Endopeptidase (input)	-18.3	99th percentile (-19.87)	31	98.45		MMP1
PATFGHLAGG	A2VDQ5	619	628	C-terminus	MMP2 (P08253; MMP2_HUMAN). Mmp2 (P33434; MMP2_MOUSE). Mmp2 (P33436; MMP2_RAT)	LAGGYDGQ	MEROPS:M10.003	Endopeptidase (input)	-21.91	MEROPS score threshold (-22.7)	76	86.88		MMP2
LGSRPLSTAMPPPPG	A1A4J8	62	76	C-terminus	MMP2 (P08253; MMP2_HUMAN). Mmp2 (P33434; MMP2_MOUSE). Mmp2 (P33436; MMP2_RAT)	PPPGSSGP	MEROPS:M10.003	Endopeptidase (input)	-21.1	MEROPS score threshold (-22.7)	76	86.88		MMP2
DALVVPVGGGGMLAGIAVT	A0JNI4	178	196	C-terminus	MMP2 (P08253; MMP2_HUMAN). Mmp2 (P33434; MMP2_MOUSE). Mmp2 (P33436; MMP2_RAT)	IAVTVKAL	MEROPS:M10.003	Endopeptidase (input)	-21.19	MEROPS score threshold (-22.7)	76	86.88		MMP2
YTSSGCVLCAGPEP	A0JNJ4	60	73	N-terminus	MMP2 (P08253; MMP2_HUMAN). Mmp2 (P33434; MMP2_MOUSE). Mmp2 (P33436; MMP2_RAT)	LLDRYTSS	MEROPS:M10.003	Endopeptidase (input)	-22.47	MEROPS score threshold (-22.7)	76	86.88		MMP2
SASSLGSGAPGP	A0JNJ4	253	264	N-terminus	MMP2 (P08253; MMP2_HUMAN). Mmp2 (P33434; MMP2_MOUSE). Mmp2 (P33436; MMP2_RAT)	SPSSSASS	MEROPS:M10.003	Endopeptidase (input)	-19.8	MEROPS score threshold (-22.7)	76	86.88		MMP2
SASSLGSGAPGP	A0JNJ4	253	264	C-terminus	MMP2 (P08253; MMP2_HUMAN). Mmp2 (P33434; MMP2_MOUSE). Mmp2 (P33436; MMP2_RAT)	APGPVEVR	MEROPS:M10.003	Endopeptidase (input)	-21.81	MEROPS score threshold (-22.7)	76	86.88		MMP2
RSAEGQWEAQPALES	A4FV37	214	228	C-terminus	MMP2 (P08253; MMP2_HUMAN). Mmp2 (P33434; MMP2_MOUSE). Mmp2 (P33436; MMP2_RAT)	ALESKLEP	MEROPS:M10.003	Endopeptidase (input)	-22.16	MEROPS score threshold (-22.7)	76	86.88		MMP2
SLSPGAASSSSGDGDGKEG	A4FV57	133	151	C-terminus	MMP2 (P08253; MMP2_HUMAN). Mmp2 (P33434; MMP2_MOUSE). Mmp2 (P33436; MMP2_RAT)	GKEGLEEP	MEROPS:M10.003	Endopeptidase (input)	-21.81	MEROPS score threshold (-22.7)	76	86.88		MMP2
LVSRSSVSHS	A1L520	309	318	N-terminus	MMP2 (P08253; MMP2_HUMAN). Mmp2 (P33434; MMP2_MOUSE). Mmp2 (P33436; MMP2_RAT)	LGMGLVSR	MEROPS:M10.003	Endopeptidase (input)	-21.62	MEROPS score threshold (-22.7)	76	86.88		MMP2
LVSRSSVSHS	A1L520	309	318	C-terminus	MMP2 (P08253; MMP2_HUMAN). Mmp2 (P33434; MMP2_MOUSE). Mmp2 (P33436; MMP2_RAT)	VSHSVLSE	MEROPS:M10.003	Endopeptidase (input)	-22.01	MEROPS score threshold (-22.7)	76	86.88		MMP2
MWRGSSAGGSQGAAME	A1L515	1	16	C-terminus	MMP2 (P08253; MMP2_HUMAN). Mmp2 (P33434; MMP2_MOUSE). Mmp2 (P33436; MMP2_RAT)	AAMEGTGG	MEROPS:M10.003	Endopeptidase (input)	-22.61	MEROPS score threshold (-22.7)	76	86.88		MMP2
LQLFSKQNRLTMTRNAV	A2VE08	217	233	N-terminus	MMP2 (P08253; MMP2_HUMAN). Mmp2 (P33434; MMP2_MOUSE). Mmp2 (P33436; MMP2_RAT)	LPPLLQLF	MEROPS:M10.003	Endopeptidase (input)	-22.06	MEROPS score threshold (-22.7)	76	86.88		MMP2
MAAPGARSCN	A4IF69	1	10	C-terminus	MMP2 (P08253; MMP2_HUMAN). Mmp2 (P33434; MMP2_MOUSE). Mmp2 (P33436; MMP2_RAT)	RSCNLSGL	MEROPS:M10.003	Endopeptidase (input)	-20.81	MEROPS score threshold (-22.7)	76	86.88		MMP2
LNGILLQLISCLQ	A4FV14	300	312	N-terminus	MMP2 (P08253; MMP2_HUMAN). Mmp2 (P33434; MMP2_MOUSE). Mmp2 (P33436; MMP2_RAT)	LGDRLNGI	MEROPS:M10.003	Endopeptidase (input)	-22.09	MEROPS score threshold (-22.7)	76	86.88		MMP2
VAPGPGLAPPAQPGAP	A2VE44	350	365	N-terminus	MMP2 (P08253; MMP2_HUMAN). Mmp2 (P33434; MMP2_MOUSE). Mmp2 (P33436; MMP2_RAT)	LVSTVAPG	MEROPS:M10.003	Endopeptidase (input)	-22.4	MEROPS score threshold (-22.7)	76	86.88		MMP2
VAPGPGLAPPAQPGAP	A2VE44	350	365	C-terminus	MMP2 (P08253; MMP2_HUMAN). Mmp2 (P33434; MMP2_MOUSE). Mmp2 (P33436; MMP2_RAT)	PGAPSMAG	MEROPS:M10.003	Endopeptidase (input)	-22.3	MEROPS score threshold (-22.7)	76	86.88		MMP2
LYSSKKKIFMGL	A2VE44	514	525	N-terminus	MMP2 (P08253; MMP2_HUMAN). Mmp2 (P33434; MMP2_MOUSE). Mmp2 (P33436; MMP2_RAT)	VLMLLYSS	MEROPS:M10.003	Endopeptidase (input)	-22.33	MEROPS score threshold (-22.7)	76	86.88		MMP2
VLLSGVIAFMVNLS	A4IFK2	227	240	N-terminus	MMP2 (P08253; MMP2_HUMAN). Mmp2 (P33434; MMP2_MOUSE). Mmp2 (P33436; MMP2_RAT)	ALLMVLLS	MEROPS:M10.003	Endopeptidase (input)	-22.5	MEROPS score threshold (-22.7)	76	86.88		MMP2
AILNVGAPAAG	A1A4J1	403	413	C-terminus	MMP2 (P08253; MMP2_HUMAN). Mmp2 (P33434; MMP2_MOUSE). Mmp2 (P33436; MMP2_RAT)	PAAGMNAA	MEROPS:M10.003	Endopeptidase (input)	-19.37	MEROPS score threshold (-22.7)	76	86.88		MMP2
GDRTSTFCGTPEFLAPE	A1A4I4	771	787	C-terminus	MMP2 (P08253; MMP2_HUMAN). Mmp2 (P33434; MMP2_MOUSE). Mmp2 (P33436; MMP2_RAT)	LAPEVLTD	MEROPS:M10.003	Endopeptidase (input)	-21.17	MEROPS score threshold (-22.7)	76	86.88		MMP2
QRSLVLFSVGVVLAL	A0JNC3	85	99	C-terminus	MMP2 (P08253; MMP2_HUMAN). Mmp2 (P33434; MMP2_MOUSE). Mmp2 (P33436; MMP2_RAT)	VLALVLNL	MEROPS:M10.003	Endopeptidase (input)	-20.63	MEROPS score threshold (-22.7)	76	86.88		MMP2
EHVFRHAAQELFG	A4FV58	321	333	C-terminus	MMP2 (P08253; MMP2_HUMAN). Mmp2 (P33434; MMP2_MOUSE). Mmp2 (P33436; MMP2_RAT)	ELFGIHVT	MEROPS:M10.003	Endopeptidase (input)	-22.6	MEROPS score threshold (-22.7)	76	86.88		MMP2
TGLSAAAPVLRR	A6H773	52	63	C-terminus	MMP2 (P08253; MMP2_HUMAN). Mmp2 (P33434; MMP2_MOUSE). Mmp2 (P33436; MMP2_RAT)	VLRRVRAQ	MEROPS:M10.003	Endopeptidase (input)	-22.47	MEROPS score threshold (-22.7)	76	86.88		MMP2
YQAHSFVSAF	A5PJL1	100	109	C-terminus	MMP2 (P08253; MMP2_HUMAN). Mmp2 (P33434; MMP2_MOUSE). Mmp2 (P33436; MMP2_RAT)	VSAFIGGL	MEROPS:M10.003	Endopeptidase (input)	-21.3	MEROPS score threshold (-22.7)	76	86.88		MMP2
LGSLTHSRREALEKT	A5D7D1	505	519	N-terminus	MMP2 (P08253; MMP2_HUMAN). Mmp2 (P33434; MMP2_MOUSE). Mmp2 (P33436; MMP2_RAT)	QWDALGSL	MEROPS:M10.003	Endopeptidase (input)	-22.57	MEROPS score threshold (-22.7)	76	86.88		MMP2
AAAEAASSSMTKGKE	A6QP11	108	122	N-terminus	MMP2 (P08253; MMP2_HUMAN). Mmp2 (P33434; MMP2_MOUSE). Mmp2 (P33436; MMP2_RAT)	SESGAAAE	MEROPS:M10.003	Endopeptidase (input)	-21.88	MEROPS score threshold (-22.7)	76	86.88		MMP2
SRSTSTGSAASSGSNSS	A5D992	112	128	C-terminus	MMP2 (P08253; MMP2_HUMAN). Mmp2 (P33434; MMP2_MOUSE). Mmp2 (P33436; MMP2_RAT)	SNSSASSE	MEROPS:M10.003	Endopeptidase (input)	-21.91	MEROPS score threshold (-22.7)	76	86.88		MMP2
AVGAMKELVER	A6QPE1	55	65	N-terminus	MMP2 (P08253; MMP2_HUMAN). Mmp2 (P33434; MMP2_MOUSE). Mmp2 (P33436; MMP2_RAT)	QGVPAVGA	MEROPS:M10.003	Endopeptidase (input)	-22	MEROPS score threshold (-22.7)	76	86.88		MMP2
LPGKKVTTEDVE	A5D7R1	303	314	N-terminus	MMP2 (P08253; MMP2_HUMAN). Mmp2 (P33434; MMP2_MOUSE). Mmp2 (P33436; MMP2_RAT)	LMESLPGK	MEROPS:M10.003	Endopeptidase (input)	-22.47	MEROPS score threshold (-22.7)	76	86.88		MMP2
LALRLSDPAAAPRE	A5PJD0	121	134	C-terminus	MMP2 (P08253; MMP2_HUMAN). Mmp2 (P33434; MMP2_MOUSE). Mmp2 (P33436; MMP2_RAT)	APRELARR	MEROPS:M10.003	Endopeptidase (input)	-22.48	MEROPS score threshold (-22.7)	76	86.88		MMP2
GPGDSPEGPEAEGPE	A6QQ47	13	27	N-terminus	MMP2 (P08253; MMP2_HUMAN). Mmp2 (P33434; MMP2_MOUSE). Mmp2 (P33436; MMP2_RAT)	GPGSGPGD	MEROPS:M10.003	Endopeptidase (input)	-22.24	MEROPS score threshold (-22.7)	76	86.88		MMP2
AVFANCAGMLVVVF	A5D9A7	197	210	N-terminus	MMP2 (P08253; MMP2_HUMAN). Mmp2 (P33434; MMP2_MOUSE). Mmp2 (P33436; MMP2_RAT)	LPSEAVFA	MEROPS:M10.003	Endopeptidase (input)	-19.92	MEROPS score threshold (-22.7)	76	86.88		MMP2
LSAATTFEPLEPVKDTD	A5PJZ5	81	97	N-terminus	MMP2 (P08253; MMP2_HUMAN). Mmp2 (P33434; MMP2_MOUSE). Mmp2 (P33436; MMP2_RAT)	RLESLSAA	MEROPS:M10.003	Endopeptidase (input)	-18.62	MEROPS score threshold (-22.7)	76	86.88		MMP2
GSKGQPVGMA	A6QPF4	32	41	N-terminus	MMP2 (P08253; MMP2_HUMAN). Mmp2 (P33434; MMP2_MOUSE). Mmp2 (P33436; MMP2_RAT)	PVAPGSKG	MEROPS:M10.003	Endopeptidase (input)	-21.56	MEROPS score threshold (-22.7)	76	86.88		MMP2
GFPSPNQSSRA	A5D7F6	1058	1068	C-terminus	MMP2 (P08253; MMP2_HUMAN). Mmp2 (P33434; MMP2_MOUSE). Mmp2 (P33436; MMP2_RAT)	SSRAFQGT	MEROPS:M10.003	Endopeptidase (input)	-21.64	MEROPS score threshold (-22.7)	76	86.88		MMP2
KTCKFVSGFMSELSPVRA	A5PJM5	332	349	C-terminus	MMP2 (P08253; MMP2_HUMAN). Mmp2 (P33434; MMP2_MOUSE). Mmp2 (P33436; MMP2_RAT)	PVRAELLG	MEROPS:M10.003	Endopeptidase (input)	-22.38	MEROPS score threshold (-22.7)	76	86.88		MMP2
SDELADVGGALRGLNLS	A5PJQ2	218	234	C-terminus	MMP2 (P08253; MMP2_HUMAN). Mmp2 (P33434; MMP2_MOUSE). Mmp2 (P33436; MMP2_RAT)	LNLSLSYD	MEROPS:M10.003	Endopeptidase (input)	-21.93	MEROPS score threshold (-22.7)	76	86.88		MMP2
TGNQASRAGQASNPGHRS	A6QLH6	668	685	C-terminus	MMP2 (P08253; MMP2_HUMAN). Mmp2 (P33434; MMP2_MOUSE). Mmp2 (P33436; MMP2_RAT)	GHRSQESD	MEROPS:M10.003	Endopeptidase (input)	-22.63	MEROPS score threshold (-22.7)	76	86.88		MMP2
PTGGGGGGGSGGTR	A7E305	54	67	N-terminus	MMP2 (P08253; MMP2_HUMAN). Mmp2 (P33434; MMP2_MOUSE). Mmp2 (P33436; MMP2_RAT)	GPNSPTGG	MEROPS:M10.003	Endopeptidase (input)	-22.58	MEROPS score threshold (-22.7)	76	86.88		MMP2
LNTLKRENSSPRVMQRK	A7E300	820	836	N-terminus	MMP2 (P08253; MMP2_HUMAN). Mmp2 (P33434; MMP2_MOUSE). Mmp2 (P33436; MMP2_RAT)	SLFHLNTL	MEROPS:M10.003	Endopeptidase (input)	-22.24	MEROPS score threshold (-22.7)	76	86.88		MMP2
WCLVAIVETIMPAD	A6QP29	731	744	C-terminus	MMP2 (P08253; MMP2_HUMAN). Mmp2 (P33434; MMP2_MOUSE). Mmp2 (P33436; MMP2_RAT)	MPADYYSK	MEROPS:M10.003	Endopeptidase (input)	-21.43	MEROPS score threshold (-22.7)	76	86.88		MMP2
RAESPSQGKPGEAGAE	E1BM58	709	724	C-terminus	MMP2 (P08253; MMP2_HUMAN). Mmp2 (P33434; MMP2_MOUSE). Mmp2 (P33436; MMP2_RAT)	AGAEVSGK	MEROPS:M10.003	Endopeptidase (input)	-20.02	MEROPS score threshold (-22.7)	76	86.88		MMP2
GAEGPSDQSAGAERTFHL	E1BM58	1147	1164	N-terminus	MMP2 (P08253; MMP2_HUMAN). Mmp2 (P33434; MMP2_MOUSE). Mmp2 (P33436; MMP2_RAT)	RAGAGAEG	MEROPS:M10.003	Endopeptidase (input)	-21.75	MEROPS score threshold (-22.7)	76	86.88		MMP2
VTQSHWPSEPSEAV	O18738	26	39	N-terminus	MMP2 (P08253; MMP2_HUMAN). Mmp2 (P33434; MMP2_MOUSE). Mmp2 (P33436; MMP2_RAT)	LSVAVTQS	MEROPS:M10.003	Endopeptidase (input)	-22.22	MEROPS score threshold (-22.7)	76	86.88		MMP2
LVRGDAAGSAG	A7MB34	193	203	N-terminus	MMP2 (P08253; MMP2_HUMAN). Mmp2 (P33434; MMP2_MOUSE). Mmp2 (P33436; MMP2_RAT)	PAAGLVRG	MEROPS:M10.003	Endopeptidase (input)	-19	MEROPS score threshold (-22.7)	76	86.88		MMP2
SGAPPASGHSHRP	A7YWM1	88	100	N-terminus	MMP2 (P08253; MMP2_HUMAN). Mmp2 (P33434; MMP2_MOUSE). Mmp2 (P33436; MMP2_RAT)	GALGSGAP	MEROPS:M10.003	Endopeptidase (input)	-21.35	MEROPS score threshold (-22.7)	76	86.88		MMP2
LMAAMGNTDH	A7MBF6	329	338	N-terminus	MMP2 (P08253; MMP2_HUMAN). Mmp2 (P33434; MMP2_MOUSE). Mmp2 (P33436; MMP2_RAT)	VIHSLMAA	MEROPS:M10.003	Endopeptidase (input)	-20.47	MEROPS score threshold (-22.7)	76	86.88		MMP2
EALQGFARSVAAARGPAA	A7YY73	112	129	C-terminus	MMP2 (P08253; MMP2_HUMAN). Mmp2 (P33434; MMP2_MOUSE). Mmp2 (P33436; MMP2_RAT)	GPAALVAP	MEROPS:M10.003	Endopeptidase (input)	-15.14	MEROPS score threshold (-22.7)	76	86.88		MMP2
KGNGMVIEMKFSNMCNKSE	G7H7V7	302	320	N-terminus	MMP2 (P08253; MMP2_HUMAN). Mmp2 (P33434; MMP2_MOUSE). Mmp2 (P33436; MMP2_RAT)	KVSEKGNG	MEROPS:M10.003	Endopeptidase (input)	-22.29	MEROPS score threshold (-22.7)	76	86.88		MMP2
LTTSPQGHFVGSDWQ	E1BD59	617	631	N-terminus	MMP2 (P08253; MMP2_HUMAN). Mmp2 (P33434; MMP2_MOUSE). Mmp2 (P33436; MMP2_RAT)	ALVFLTTS	MEROPS:M10.003	Endopeptidase (input)	-21.12	MEROPS score threshold (-22.7)	76	86.88		MMP2
EFSVDIGRLAQE	A7Z050	1374	1385	C-terminus	MMP2 (P08253; MMP2_HUMAN). Mmp2 (P33434; MMP2_MOUSE). Mmp2 (P33436; MMP2_RAT)	LAQEASAI	MEROPS:M10.003	Endopeptidase (input)	-21.08	MEROPS score threshold (-22.7)	76	86.88		MMP2
LPASDLLPGGPSSPLANS	A7YWC8	130	147	N-terminus	MMP2 (P08253; MMP2_HUMAN). Mmp2 (P33434; MMP2_MOUSE). Mmp2 (P33436; MMP2_RAT)	RLGPLPAS	MEROPS:M10.003	Endopeptidase (input)	-21.17	MEROPS score threshold (-22.7)	76	86.88		MMP2
LISKGKKTGAKGKR	A7YY35	804	817	N-terminus	MMP2 (P08253; MMP2_HUMAN). Mmp2 (P33434; MMP2_MOUSE). Mmp2 (P33436; MMP2_RAT)	KKSQLISK	MEROPS:M10.003	Endopeptidase (input)	-20.24	MEROPS score threshold (-22.7)	76	86.88		MMP2
FSELPEVLDQIQN	F1MCA7	196	208	C-terminus	MMP2 (P08253; MMP2_HUMAN). Mmp2 (P33434; MMP2_MOUSE). Mmp2 (P33436; MMP2_RAT)	QIQNLREL	MEROPS:M10.003	Endopeptidase (input)	-20.45	MEROPS score threshold (-22.7)	76	86.88		MMP2
AGSGPAGVSSPRKGL	E1BBG2	108	122	C-terminus	MMP2 (P08253; MMP2_HUMAN). Mmp2 (P33434; MMP2_MOUSE). Mmp2 (P33436; MMP2_RAT)	RKGLVLSS	MEROPS:M10.003	Endopeptidase (input)	-22.47	MEROPS score threshold (-22.7)	76	86.88		MMP2
ETGDDLLVSEVTQSNKE	F1MRW8	439	455	N-terminus	MMP2 (P08253; MMP2_HUMAN). Mmp2 (P33434; MMP2_MOUSE). Mmp2 (P33436; MMP2_RAT)	SLAPETGD	MEROPS:M10.003	Endopeptidase (input)	-21.17	MEROPS score threshold (-22.7)	76	86.88		MMP2
SGPSSGPQMSSGPGGAPLD	A7Z019	137	155	C-terminus	MMP2 (P08253; MMP2_HUMAN). Mmp2 (P33434; MMP2_MOUSE). Mmp2 (P33436; MMP2_RAT)	APLDGADP	MEROPS:M10.003	Endopeptidase (input)	-22.3	MEROPS score threshold (-22.7)	76	86.88		MMP2
ALLPEPLKPQAALPVPPS	O18964	1220	1237	C-terminus	MMP2 (P08253; MMP2_HUMAN). Mmp2 (P33434; MMP2_MOUSE). Mmp2 (P33436; MMP2_RAT)	VPPSLAPP	MEROPS:M10.003	Endopeptidase (input)	-21.57	MEROPS score threshold (-22.7)	76	86.88		MMP2
NGPGSRSKVPSGTNNHSL	A8E653	79	96	C-terminus	MMP2 (P08253; MMP2_HUMAN). Mmp2 (P33434; MMP2_MOUSE). Mmp2 (P33436; MMP2_RAT)	NHSLLQQE	MEROPS:M10.003	Endopeptidase (input)	-22.69	MEROPS score threshold (-22.7)	76	86.88		MMP2
AAPASTHTTAT	F1MCY2	248	258	C-terminus	MMP2 (P08253; MMP2_HUMAN). Mmp2 (P33434; MMP2_MOUSE). Mmp2 (P33436; MMP2_RAT)	TTATLSLT	MEROPS:M10.003	Endopeptidase (input)	-21.92	MEROPS score threshold (-22.7)	76	86.88		MMP2
VDVVKTRYMNSPPGQYHS	O77792	237	254	N-terminus	MMP2 (P08253; MMP2_HUMAN). Mmp2 (P33434; MMP2_MOUSE). Mmp2 (P33436; MMP2_RAT)	VASPVDVV	MEROPS:M10.003	Endopeptidase (input)	-22.29	MEROPS score threshold (-22.7)	76	86.88		MMP2
GCHLPHTHSLPNRRVLTL	P05008	23	40	C-terminus	MMP2 (P08253; MMP2_HUMAN). Mmp2 (P33434; MMP2_MOUSE). Mmp2 (P33436; MMP2_RAT)	VLTLLRQL	MEROPS:M10.003	Endopeptidase (input)	-22.68	MEROPS score threshold (-22.7)	76	86.88		MMP2
FCLLGPEGTPASWSLMD	O77512	206	222	C-terminus	MMP2 (P08253; MMP2_HUMAN). Mmp2 (P33434; MMP2_MOUSE). Mmp2 (P33436; MMP2_RAT)	SLMDQTGE	MEROPS:M10.003	Endopeptidase (input)	-22.65	MEROPS score threshold (-22.7)	76	86.88		MMP2
WYFTTTYNVVKP	P10123	245	256	C-terminus	MMP2 (P08253; MMP2_HUMAN). Mmp2 (P33434; MMP2_MOUSE). Mmp2 (P33436; MMP2_RAT)	VVKPFLKS	MEROPS:M10.003	Endopeptidase (input)	-21.41	MEROPS score threshold (-22.7)	76	86.88		MMP2
NSGGGGAAGGGPGERKRT	O46606	129	146	N-terminus	MMP2 (P08253; MMP2_HUMAN). Mmp2 (P33434; MMP2_MOUSE). Mmp2 (P33436; MMP2_RAT)	LVPSNSGG	MEROPS:M10.003	Endopeptidase (input)	-22.34	MEROPS score threshold (-22.7)	76	86.88		MMP2
LTSAPVPSTTTRSLTACP	P08037	118	135	N-terminus	MMP2 (P08253; MMP2_HUMAN). Mmp2 (P33434; MMP2_MOUSE). Mmp2 (P33436; MMP2_RAT)	PGSNLTSA	MEROPS:M10.003	Endopeptidase (input)	-18.15	MEROPS score threshold (-22.7)	76	86.88		MMP2
GLPGVGVPGVGVPGVGVPG	P04985	333	351	N-terminus	MMP2 (P08253; MMP2_HUMAN). Mmp2 (P33434; MMP2_MOUSE). Mmp2 (P33436; MMP2_RAT)	GAAGGLPG	MEROPS:M10.003	Endopeptidase (input)	-21.91	MEROPS score threshold (-22.7)	76	86.88		MMP2
GLPGVGVPGVGVPGVGVPG	P04985	333	351	C-terminus	MMP2 (P08253; MMP2_HUMAN). Mmp2 (P33434; MMP2_MOUSE). Mmp2 (P33436; MMP2_RAT)	GVPGVGVP	MEROPS:M10.003	Endopeptidase (input)	-21.49	MEROPS score threshold (-22.7)	76	86.88		MMP2
DPASGEGVPPG	P01267	1128	1138	C-terminus	MMP2 (P08253; MMP2_HUMAN). Mmp2 (P33434; MMP2_MOUSE). Mmp2 (P33436; MMP2_RAT)	VPPGTNSS	MEROPS:M10.003	Endopeptidase (input)	-22.18	MEROPS score threshold (-22.7)	76	86.88		MMP2
LYLNVFVPQNMAPNASV	P01267	2283	2299	C-terminus	MMP2 (P08253; MMP2_HUMAN). Mmp2 (P33434; MMP2_MOUSE). Mmp2 (P33436; MMP2_RAT)	NASVLVFF	MEROPS:M10.003	Endopeptidase (input)	-21.95	MEROPS score threshold (-22.7)	76	86.88		MMP2
YRIIATTEG	P10861	163	171	C-terminus	MMP2 (P08253; MMP2_HUMAN). Mmp2 (P33434; MMP2_MOUSE). Mmp2 (P33436; MMP2_RAT)	TTEGLTGL	MEROPS:M10.003	Endopeptidase (input)	-19.48	MEROPS score threshold (-22.7)	76	86.88		MMP2
GFPPLPPPPPQLPT	P09851	129	142	C-terminus	MMP2 (P08253; MMP2_HUMAN). Mmp2 (P33434; MMP2_MOUSE). Mmp2 (P33436; MMP2_RAT)	QLPTLGAG	MEROPS:M10.003	Endopeptidase (input)	-21.09	MEROPS score threshold (-22.7)	76	86.88		MMP2
AAAAAGAGGEMAFAKG	P09851	100	115	N-terminus	MMP2 (P08253; MMP2_HUMAN). Mmp2 (P33434; MMP2_MOUSE). Mmp2 (P33436; MMP2_RAT)	VAGVAAAA	MEROPS:M10.003	Endopeptidase (input)	-21.77	MEROPS score threshold (-22.7)	76	86.88		MMP2
AAAAAGAGGEMAFAKG	P09851	100	115	C-terminus	MMP2 (P08253; MMP2_HUMAN). Mmp2 (P33434; MMP2_MOUSE). Mmp2 (P33436; MMP2_RAT)	FAKGTTSL	MEROPS:M10.003	Endopeptidase (input)	-21.44	MEROPS score threshold (-22.7)	76	86.88		MMP2
LSAGGAAAGVAGVAAA	P09851	87	102	N-terminus	MMP2 (P08253; MMP2_HUMAN). Mmp2 (P33434; MMP2_MOUSE). Mmp2 (P33436; MMP2_RAT)	GGVGLSAG	MEROPS:M10.003	Endopeptidase (input)	-19.1	MEROPS score threshold (-22.7)	76	86.88		MMP2
LSAGGAAAGVAGVAAA	P09851	87	102	C-terminus	MMP2 (P08253; MMP2_HUMAN). Mmp2 (P33434; MMP2_MOUSE). Mmp2 (P33436; MMP2_RAT)	VAAAAAGA	MEROPS:M10.003	Endopeptidase (input)	-18.85	MEROPS score threshold (-22.7)	76	86.88		MMP2
EKGAPGADGPAGAPGTP	P02453	932	948	N-terminus	MMP2 (P08253; MMP2_HUMAN). Mmp2 (P33434; MMP2_MOUSE). Mmp2 (P33436; MMP2_RAT)	GPAGEKGA	MEROPS:M10.003	Endopeptidase (input)	-18.86	MEROPS score threshold (-22.7)	76	86.88		MMP2
PAGPIGPVGARGPAGPQG	P02453	1073	1090	N-terminus	MMP2 (P08253; MMP2_HUMAN). Mmp2 (P33434; MMP2_MOUSE). Mmp2 (P33436; MMP2_RAT)	GPAGPAGP	MEROPS:M10.003	Endopeptidase (input)	-20.89	MEROPS score threshold (-22.7)	76	86.88		MMP2
PAGPIGPVGARGPAGPQG	P02453	1073	1090	C-terminus	MMP2 (P08253; MMP2_HUMAN). Mmp2 (P33434; MMP2_MOUSE). Mmp2 (P33436; MMP2_RAT)	GPQGPRGD	MEROPS:M10.003	Endopeptidase (input)	-22.64	MEROPS score threshold (-22.7)	76	86.88		MMP2
PVGPTGPVGAAG	P02465	750	761	C-terminus	MMP2 (P08253; MMP2_HUMAN). Mmp2 (P33434; MMP2_MOUSE). Mmp2 (P33436; MMP2_RAT)	GAAGPSGP	MEROPS:M10.003	Endopeptidase (input)	-21.65	MEROPS score threshold (-22.7)	76	86.88		MMP2
HPGKPGRPGERGVVGPQG	P02465	144	161	C-terminus	MMP2 (P08253; MMP2_HUMAN). Mmp2 (P33434; MMP2_MOUSE). Mmp2 (P33436; MMP2_RAT)	GPQGARGF	MEROPS:M10.003	Endopeptidase (input)	-20.81	MEROPS score threshold (-22.7)	76	86.88		MMP2
NKKKSEPSSPDHVSST	P10894	974	989	C-terminus	MMP2 (P08253; MMP2_HUMAN). Mmp2 (P33434; MMP2_MOUSE). Mmp2 (P33436; MMP2_RAT)	VSSTIEQD	MEROPS:M10.003	Endopeptidase (input)	-22.53	MEROPS score threshold (-22.7)	76	86.88		MMP2
KNGDQHPSAT	P10895	738	747	N-terminus	MMP2 (P08253; MMP2_HUMAN). Mmp2 (P33434; MMP2_MOUSE). Mmp2 (P33436; MMP2_RAT)	HLLSKNGD	MEROPS:M10.003	Endopeptidase (input)	-22.7	MEROPS score threshold (-22.7)	76	86.88		MMP2
KNGDQHPSAT	P10895	738	747	C-terminus	MMP2 (P08253; MMP2_HUMAN). Mmp2 (P33434; MMP2_MOUSE). Mmp2 (P33436; MMP2_RAT)	PSATLFVK	MEROPS:M10.003	Endopeptidase (input)	-20.82	MEROPS score threshold (-22.7)	76	86.88		MMP2
GFGLSPIFPGGAGGLG	P04985-4	714	729	N-terminus	MMP2 (P08253; MMP2_HUMAN). Mmp2 (P33434; MMP2_MOUSE). Mmp2 (P33436; MMP2_RAT)	AARPGFGL	MEROPS:M10.003	Endopeptidase (input)	-21.92	MEROPS score threshold (-22.7)	76	86.88		MMP2
GFGLSPIFPGGAGGLG	P04985-4	714	729	C-terminus	MMP2 (P08253; MMP2_HUMAN). Mmp2 (P33434; MMP2_MOUSE). Mmp2 (P33436; MMP2_RAT)	GGLGVGGK	MEROPS:M10.003	Endopeptidase (input)	-21.32	MEROPS score threshold (-22.7)	76	86.88		MMP2
ATSHDSQITQEAVPKS	P38574	243	258	C-terminus	MMP2 (P08253; MMP2_HUMAN). Mmp2 (P33434; MMP2_MOUSE). Mmp2 (P33436; MMP2_RAT)	VPKSLGTS	MEROPS:M10.003	Endopeptidase (input)	-19.23	MEROPS score threshold (-22.7)	76	86.88		MMP2
RSGSIIDQTRVLN	P48733	590	602	C-terminus	MMP2 (P08253; MMP2_HUMAN). Mmp2 (P33434; MMP2_MOUSE). Mmp2 (P33436; MMP2_RAT)	RVLNLGPI	MEROPS:M10.003	Endopeptidase (input)	-22.4	MEROPS score threshold (-22.7)	76	86.88		MMP2
LSSCSSQSLQLTSCL	P35833	82	96	N-terminus	MMP2 (P08253; MMP2_HUMAN). Mmp2 (P33434; MMP2_MOUSE). Mmp2 (P33436; MMP2_RAT)	PQAPLSSC	MEROPS:M10.003	Endopeptidase (input)	-21.09	MEROPS score threshold (-22.7)	76	86.88		MMP2
SVVVGPSVVAV	P12763	290	300	N-terminus	MMP2 (P08253; MMP2_HUMAN). Mmp2 (P33434; MMP2_MOUSE). Mmp2 (P33436; MMP2_RAT)	PPVASVVV	MEROPS:M10.003	Endopeptidase (input)	-20.4	MEROPS score threshold (-22.7)	76	86.88		MMP2
LVLLLVQVQPSLGKESA	P39873	14	30	N-terminus	MMP2 (P08253; MMP2_HUMAN). Mmp2 (P33434; MMP2_MOUSE). Mmp2 (P33436; MMP2_RAT)	SLLVLVLL	MEROPS:M10.003	Endopeptidase (input)	-21.28	MEROPS score threshold (-22.7)	76	86.88		MMP2
VKGIPLIKYFAEALGPLES	P50227	15	33	N-terminus	MMP2 (P08253; MMP2_HUMAN). Mmp2 (P33434; MMP2_MOUSE). Mmp2 (P33436; MMP2_RAT)	PAKYVKGI	MEROPS:M10.003	Endopeptidase (input)	-21.85	MEROPS score threshold (-22.7)	76	86.88		MMP2
LGLLSGPRSAH	P30404	12	22	N-terminus	MMP2 (P08253; MMP2_HUMAN). Mmp2 (P33434; MMP2_MOUSE). Mmp2 (P33436; MMP2_RAT)	GPRLLGLL	MEROPS:M10.003	Endopeptidase (input)	-20.79	MEROPS score threshold (-22.7)	76	86.88		MMP2
LGLLSGPRSAH	P30404	12	22	C-terminus	MMP2 (P08253; MMP2_HUMAN). Mmp2 (P33434; MMP2_MOUSE). Mmp2 (P33436; MMP2_RAT)	RSAHLRLP	MEROPS:M10.003	Endopeptidase (input)	-22.15	MEROPS score threshold (-22.7)	76	86.88		MMP2
GLPVGAGPGALQGSGL	P19754	1101	1116	N-terminus	MMP2 (P08253; MMP2_HUMAN). Mmp2 (P33434; MMP2_MOUSE). Mmp2 (P33436; MMP2_RAT)	PPAAGLPV	MEROPS:M10.003	Endopeptidase (input)	-21.44	MEROPS score threshold (-22.7)	76	86.88		MMP2
PGGMPGGMPGGFPGGGAPP	P19120	618	636	C-terminus	MMP2 (P08253; MMP2_HUMAN). Mmp2 (P33434; MMP2_MOUSE). Mmp2 (P33436; MMP2_RAT)	GAPPSGGA	MEROPS:M10.003	Endopeptidase (input)	-22.68	MEROPS score threshold (-22.7)	76	86.88		MMP2
LPGPSGNMGPQGPKGIP	P23206	336	352	N-terminus	MMP2 (P08253; MMP2_HUMAN). Mmp2 (P33434; MMP2_MOUSE). Mmp2 (P33436; MMP2_RAT)	GEAGLPGP	MEROPS:M10.003	Endopeptidase (input)	-21.39	MEROPS score threshold (-22.7)	76	86.88		MMP2
VVVKCDGRGSGFQG	P42659	654	667	N-terminus	MMP2 (P08253; MMP2_HUMAN). Mmp2 (P33434; MMP2_MOUSE). Mmp2 (P33436; MMP2_RAT)	SHGAVVVK	MEROPS:M10.003	Endopeptidase (input)	-20.65	MEROPS score threshold (-22.7)	76	86.88		MMP2
SVLPSGEGHLETSS	P13608	1249	1262	C-terminus	MMP2 (P08253; MMP2_HUMAN). Mmp2 (P33434; MMP2_MOUSE). Mmp2 (P33436; MMP2_RAT)	ETSSGVED	MEROPS:M10.003	Endopeptidase (input)	-22.63	MEROPS score threshold (-22.7)	76	86.88		MMP2
LDLQVISPQPRSIGLIAG	Q08DK1	228	245	C-terminus	MMP2 (P08253; MMP2_HUMAN). Mmp2 (P33434; MMP2_MOUSE). Mmp2 (P33436; MMP2_RAT)	LIAGAIGT	MEROPS:M10.003	Endopeptidase (input)	-19.2	MEROPS score threshold (-22.7)	76	86.88		MMP2
HYSAAQGGSQHYQGQS	Q08E31	203	218	N-terminus	MMP2 (P08253; MMP2_HUMAN). Mmp2 (P33434; MMP2_MOUSE). Mmp2 (P33436; MMP2_RAT)	AASSHYSA	MEROPS:M10.003	Endopeptidase (input)	-22.52	MEROPS score threshold (-22.7)	76	86.88		MMP2
ASAAKSPLLNSPT	Q08DG7	138	150	N-terminus	MMP2 (P08253; MMP2_HUMAN). Mmp2 (P33434; MMP2_MOUSE). Mmp2 (P33436; MMP2_RAT)	NPTPASAA	MEROPS:M10.003	Endopeptidase (input)	-21.94	MEROPS score threshold (-22.7)	76	86.88		MMP2
VKGGYTLDANKGGGHQT	Q01107	784	800	C-terminus	MMP2 (P08253; MMP2_HUMAN). Mmp2 (P33434; MMP2_MOUSE). Mmp2 (P33436; MMP2_RAT)	GHQTLESV	MEROPS:M10.003	Endopeptidase (input)	-21.2	MEROPS score threshold (-22.7)	76	86.88		MMP2
DDFVSGVPRA	P80746	267	276	C-terminus	MMP2 (P08253; MMP2_HUMAN). Mmp2 (P33434; MMP2_MOUSE). Mmp2 (P33436; MMP2_RAT)	VPRAARTL	MEROPS:M10.003	Endopeptidase (input)	-21.28	MEROPS score threshold (-22.7)	76	86.88		MMP2
LSDPQERAWYDNHREAL	Q0II91	56	72	C-terminus	MMP2 (P08253; MMP2_HUMAN). Mmp2 (P33434; MMP2_MOUSE). Mmp2 (P33436; MMP2_RAT)	REALLKGG	MEROPS:M10.003	Endopeptidase (input)	-20.55	MEROPS score threshold (-22.7)	76	86.88		MMP2
LGHGGLTAFSSSS	Q0III6	167	179	N-terminus	MMP2 (P08253; MMP2_HUMAN). Mmp2 (P33434; MMP2_MOUSE). Mmp2 (P33436; MMP2_RAT)	SFGSLGHG	MEROPS:M10.003	Endopeptidase (input)	-22.17	MEROPS score threshold (-22.7)	76	86.88		MMP2
LGHGGLTAFSSSS	Q0III6	167	179	C-terminus	MMP2 (P08253; MMP2_HUMAN). Mmp2 (P33434; MMP2_MOUSE). Mmp2 (P33436; MMP2_RAT)	SSSSAFGG	MEROPS:M10.003	Endopeptidase (input)	-21.46	MEROPS score threshold (-22.7)	76	86.88		MMP2
LLAGLGHEER	P79114	266	275	N-terminus	MMP2 (P08253; MMP2_HUMAN). Mmp2 (P33434; MMP2_MOUSE). Mmp2 (P33436; MMP2_RAT)	IFYALLAG	MEROPS:M10.003	Endopeptidase (input)	-20.37	MEROPS score threshold (-22.7)	76	86.88		MMP2
AYMVAGTVHWLSN	P58353	411	423	C-terminus	MMP2 (P08253; MMP2_HUMAN). Mmp2 (P33434; MMP2_MOUSE). Mmp2 (P33436; MMP2_RAT)	WLSNFTVG	MEROPS:M10.003	Endopeptidase (input)	-22.7	MEROPS score threshold (-22.7)	76	86.88		MMP2
DVQYVTAGTGAVNV	P58353	313	326	C-terminus	MMP2 (P08253; MMP2_HUMAN). Mmp2 (P33434; MMP2_MOUSE). Mmp2 (P33436; MMP2_RAT)	AVNVLITV	MEROPS:M10.003	Endopeptidase (input)	-20.68	MEROPS score threshold (-22.7)	76	86.88		MMP2
TRAAGTTAPVVTPAAD	P55203	160	175	C-terminus	MMP2 (P08253; MMP2_HUMAN). Mmp2 (P33434; MMP2_MOUSE). Mmp2 (P33436; MMP2_RAT)	PAADALYA	MEROPS:M10.003	Endopeptidase (input)	-21.53	MEROPS score threshold (-22.7)	76	86.88		MMP2
PEEEPEYHAEAAAQE	Q0III0	126	140	C-terminus	MMP2 (P08253; MMP2_HUMAN). Mmp2 (P33434; MMP2_MOUSE). Mmp2 (P33436; MMP2_RAT)	AAQESFAV	MEROPS:M10.003	Endopeptidase (input)	-21.42	MEROPS score threshold (-22.7)	76	86.88		MMP2
GYSTAAPAYGLPKR	Q08E27	639	652	C-terminus	MMP2 (P08253; MMP2_HUMAN). Mmp2 (P33434; MMP2_MOUSE). Mmp2 (P33436; MMP2_RAT)	LPKRMVLL	MEROPS:M10.003	Endopeptidase (input)	-21.52	MEROPS score threshold (-22.7)	76	86.88		MMP2
PEAEAIVTAASETK	P81282	2939	2952	C-terminus	MMP2 (P08253; MMP2_HUMAN). Mmp2 (P33434; MMP2_MOUSE). Mmp2 (P33436; MMP2_RAT)	SETKLEGA	MEROPS:M10.003	Endopeptidase (input)	-22.59	MEROPS score threshold (-22.7)	76	86.88		MMP2
VQSLEASILNDTSGDYE	P81282	2281	2297	N-terminus	MMP2 (P08253; MMP2_HUMAN). Mmp2 (P33434; MMP2_MOUSE). Mmp2 (P33436; MMP2_RAT)	LTSQVQSL	MEROPS:M10.003	Endopeptidase (input)	-20.89	MEROPS score threshold (-22.7)	76	86.88		MMP2
LTSDHKSKVKEIVAQHT	Q07722	853	869	N-terminus	MMP2 (P08253; MMP2_HUMAN). Mmp2 (P33434; MMP2_MOUSE). Mmp2 (P33436; MMP2_RAT)	KIQTLTSD	MEROPS:M10.003	Endopeptidase (input)	-19.58	MEROPS score threshold (-22.7)	76	86.88		MMP2
DFLSCMSRRSGLPRW	Q0VCT2	261	275	C-terminus	MMP2 (P08253; MMP2_HUMAN). Mmp2 (P33434; MMP2_MOUSE). Mmp2 (P33436; MMP2_RAT)	LPRWILAC	MEROPS:M10.003	Endopeptidase (input)	-21.7	MEROPS score threshold (-22.7)	76	86.88		MMP2
MTCLIHVLEAWFGVEH	Q0VCR6	18	33	C-terminus	MMP2 (P08253; MMP2_HUMAN). Mmp2 (P33434; MMP2_MOUSE). Mmp2 (P33436; MMP2_RAT)	GVEHLEDY	MEROPS:M10.003	Endopeptidase (input)	-22.49	MEROPS score threshold (-22.7)	76	86.88		MMP2
VEVEFGGGAELL	Q148F0	7	18	N-terminus	MMP2 (P08253; MMP2_HUMAN). Mmp2 (P33434; MMP2_MOUSE). Mmp2 (P33436; MMP2_RAT)	APLSVEVE	MEROPS:M10.003	Endopeptidase (input)	-20.38	MEROPS score threshold (-22.7)	76	86.88		MMP2
ASAVVAVGAGGAPAGPA	Q0P5L0	230	246	N-terminus	MMP2 (P08253; MMP2_HUMAN). Mmp2 (P33434; MMP2_MOUSE). Mmp2 (P33436; MMP2_RAT)	GLEEASAV	MEROPS:M10.003	Endopeptidase (input)	-20.97	MEROPS score threshold (-22.7)	76	86.88		MMP2
ASAVVAVGAGGAPAGPA	Q0P5L0	230	246	C-terminus	MMP2 (P08253; MMP2_HUMAN). Mmp2 (P33434; MMP2_MOUSE). Mmp2 (P33436; MMP2_RAT)	AGPAVIGP	MEROPS:M10.003	Endopeptidase (input)	-20.95	MEROPS score threshold (-22.7)	76	86.88		MMP2
WVLALVFGLSLVYF	Q17QN8	17	30	C-terminus	MMP2 (P08253; MMP2_HUMAN). Mmp2 (P33434; MMP2_MOUSE). Mmp2 (P33436; MMP2_RAT)	LVYFLTST	MEROPS:M10.003	Endopeptidase (input)	-21.46	MEROPS score threshold (-22.7)	76	86.88		MMP2
METLSYSYC	Q0VCY6	150	158	N-terminus	MMP2 (P08253; MMP2_HUMAN). Mmp2 (P33434; MMP2_MOUSE). Mmp2 (P33436; MMP2_RAT)	VPSLMETL	MEROPS:M10.003	Endopeptidase (input)	-21.66	MEROPS score threshold (-22.7)	76	86.88		MMP2
VTAEEAAGASPAKVNGQE	Q0VBZ9	13	30	N-terminus	MMP2 (P08253; MMP2_HUMAN). Mmp2 (P33434; MMP2_MOUSE). Mmp2 (P33436; MMP2_RAT)	PRGDVTAE	MEROPS:M10.003	Endopeptidase (input)	-22.23	MEROPS score threshold (-22.7)	76	86.88		MMP2
EWLKMSYPAKVT	Q0VC58	175	186	C-terminus	MMP2 (P08253; MMP2_HUMAN). Mmp2 (P33434; MMP2_MOUSE). Mmp2 (P33436; MMP2_RAT)	AKVTLLGS	MEROPS:M10.003	Endopeptidase (input)	-20.95	MEROPS score threshold (-22.7)	76	86.88		MMP2
PSEEFSKHAAATAAASP	Q0V8E4	382	398	C-terminus	MMP2 (P08253; MMP2_HUMAN). Mmp2 (P33434; MMP2_MOUSE). Mmp2 (P33436; MMP2_RAT)	AASPGEQL	MEROPS:M10.003	Endopeptidase (input)	-22.67	MEROPS score threshold (-22.7)	76	86.88		MMP2
REAEQLRFLFRKLASG	Q0V8C2	632	647	C-terminus	MMP2 (P08253; MMP2_HUMAN). Mmp2 (P33434; MMP2_MOUSE). Mmp2 (P33436; MMP2_RAT)	LASGFGEE	MEROPS:M10.003	Endopeptidase (input)	-20.79	MEROPS score threshold (-22.7)	76	86.88		MMP2
AIGPWLSAAAVIHEPKP	Q0VCZ0	149	165	N-terminus	MMP2 (P08253; MMP2_HUMAN). Mmp2 (P33434; MMP2_MOUSE). Mmp2 (P33436; MMP2_RAT)	STARAIGP	MEROPS:M10.003	Endopeptidase (input)	-21.85	MEROPS score threshold (-22.7)	76	86.88		MMP2
LTGPLNLNDPEAKCR	Q0VD30	281	295	N-terminus	MMP2 (P08253; MMP2_HUMAN). Mmp2 (P33434; MMP2_MOUSE). Mmp2 (P33436; MMP2_RAT)	YGRFLTGP	MEROPS:M10.003	Endopeptidase (input)	-21.79	MEROPS score threshold (-22.7)	76	86.88		MMP2
PVASQGGSLPAS	Q0VCT9	102	113	C-terminus	MMP2 (P08253; MMP2_HUMAN). Mmp2 (P33434; MMP2_MOUSE). Mmp2 (P33436; MMP2_RAT)	LPASMQLQ	MEROPS:M10.003	Endopeptidase (input)	-20.49	MEROPS score threshold (-22.7)	76	86.88		MMP2
GSSVASAPVSSFPRTS	Q0VD59	54	69	N-terminus	MMP2 (P08253; MMP2_HUMAN). Mmp2 (P33434; MMP2_MOUSE). Mmp2 (P33436; MMP2_RAT)	SKAGGSSV	MEROPS:M10.003	Endopeptidase (input)	-21.96	MEROPS score threshold (-22.7)	76	86.88		MMP2
MSFYVRPSPAKRR	Q0VCT3	29	41	C-terminus	MMP2 (P08253; MMP2_HUMAN). Mmp2 (P33434; MMP2_MOUSE). Mmp2 (P33436; MMP2_RAT)	AKRRLSTL	MEROPS:M10.003	Endopeptidase (input)	-21.9	MEROPS score threshold (-22.7)	76	86.88		MMP2
GTKAGVEAAGTGCCMC	Q1JQA4	276	291	N-terminus	MMP2 (P08253; MMP2_HUMAN). Mmp2 (P33434; MMP2_MOUSE). Mmp2 (P33436; MMP2_RAT)	LLGPGTKA	MEROPS:M10.003	Endopeptidase (input)	-21.66	MEROPS score threshold (-22.7)	76	86.88		MMP2
ALALPGEPPVPAAPAGE	Q1LZD9	35	51	N-terminus	MMP2 (P08253; MMP2_HUMAN). Mmp2 (P33434; MMP2_MOUSE). Mmp2 (P33436; MMP2_RAT)	PAALALAL	MEROPS:M10.003	Endopeptidase (input)	-20.4	MEROPS score threshold (-22.7)	76	86.88		MMP2
AAAAAAAGAAGGRGS	Q28165	5	19	N-terminus	MMP2 (P08253; MMP2_HUMAN). Mmp2 (P33434; MMP2_MOUSE). Mmp2 (P33436; MMP2_RAT)	MAAAAAAA	MEROPS:M10.003	Endopeptidase (input)	-19.83	MEROPS score threshold (-22.7)	76	86.88		MMP2
LDTLGGPGERERAAM	Q1LZE8	315	329	C-terminus	MMP2 (P08253; MMP2_HUMAN). Mmp2 (P33434; MMP2_MOUSE). Mmp2 (P33436; MMP2_RAT)	RAAMLIKR	MEROPS:M10.003	Endopeptidase (input)	-21.71	MEROPS score threshold (-22.7)	76	86.88		MMP2
DSSMMPIMGY	Q27963	402	411	C-terminus	MMP2 (P08253; MMP2_HUMAN). Mmp2 (P33434; MMP2_MOUSE). Mmp2 (P33436; MMP2_RAT)	IMGYLVDL	MEROPS:M10.003	Endopeptidase (input)	-21.26	MEROPS score threshold (-22.7)	76	86.88		MMP2
SKSKSASFKESYMAAFYE	Q28013	526	543	N-terminus	MMP2 (P08253; MMP2_HUMAN). Mmp2 (P33434; MMP2_MOUSE). Mmp2 (P33436; MMP2_RAT)	LGSLSKSK	MEROPS:M10.003	Endopeptidase (input)	-22.63	MEROPS score threshold (-22.7)	76	86.88		MMP2
PGPMGLTGRPGPVGGPG	Q28083	298	314	C-terminus	MMP2 (P08253; MMP2_HUMAN). Mmp2 (P33434; MMP2_MOUSE). Mmp2 (P33436; MMP2_RAT)	GGPGSSGA	MEROPS:M10.003	Endopeptidase (input)	-22.35	MEROPS score threshold (-22.7)	76	86.88		MMP2
LGAGPASISCASFLAR	Q28007	193	208	N-terminus	MMP2 (P08253; MMP2_HUMAN). Mmp2 (P33434; MMP2_MOUSE). Mmp2 (P33436; MMP2_RAT)	KIALLGAG	MEROPS:M10.003	Endopeptidase (input)	-19.42	MEROPS score threshold (-22.7)	76	86.88		MMP2
LGAGPASISCASFLAR	Q28007	193	208	C-terminus	MMP2 (P08253; MMP2_HUMAN). Mmp2 (P33434; MMP2_MOUSE). Mmp2 (P33436; MMP2_RAT)	FLARLGYN	MEROPS:M10.003	Endopeptidase (input)	-22.11	MEROPS score threshold (-22.7)	76	86.88		MMP2
LVGVTAACTVRKRC	Q1RMT1	348	361	N-terminus	MMP2 (P08253; MMP2_HUMAN). Mmp2 (P33434; MMP2_MOUSE). Mmp2 (P33436; MMP2_RAT)	AGKSLVGV	MEROPS:M10.003	Endopeptidase (input)	-18.44	MEROPS score threshold (-22.7)	76	86.88		MMP2
VIDVGQRFLVNRVQD	Q28901	216	230	N-terminus	MMP2 (P08253; MMP2_HUMAN). Mmp2 (P33434; MMP2_MOUSE). Mmp2 (P33436; MMP2_RAT)	SLIKVIDV	MEROPS:M10.003	Endopeptidase (input)	-22.69	MEROPS score threshold (-22.7)	76	86.88		MMP2
AVATSKPGLRP	Q1LZG6	31	41	N-terminus	MMP2 (P08253; MMP2_HUMAN). Mmp2 (P33434; MMP2_MOUSE). Mmp2 (P33436; MMP2_RAT)	VPVAAVAT	MEROPS:M10.003	Endopeptidase (input)	-19.9	MEROPS score threshold (-22.7)	76	86.88		MMP2
PSCMASCGGTIHNATLGR	Q29RN8	343	360	C-terminus	MMP2 (P08253; MMP2_HUMAN). Mmp2 (P33434; MMP2_MOUSE). Mmp2 (P33436; MMP2_RAT)	TLGRIVSP	MEROPS:M10.003	Endopeptidase (input)	-19.43	MEROPS score threshold (-22.7)	76	86.88		MMP2
LVEAIEIYPLAEAEGVQIS	Q29RK0	877	895	N-terminus	MMP2 (P08253; MMP2_HUMAN). Mmp2 (P33434; MMP2_MOUSE). Mmp2 (P33436; MMP2_RAT)	EALPLVEA	MEROPS:M10.003	Endopeptidase (input)	-19.4	MEROPS score threshold (-22.7)	76	86.88		MMP2
SNPDSTYED	Q24K09	516	524	C-terminus	MMP2 (P08253; MMP2_HUMAN). Mmp2 (P33434; MMP2_MOUSE). Mmp2 (P33436; MMP2_RAT)	TYEDLINK	MEROPS:M10.003	Endopeptidase (input)	-22.31	MEROPS score threshold (-22.7)	76	86.88		MMP2
LASYGAHGAQFPDAYGKE	Q2KI29	22	39	N-terminus	MMP2 (P08253; MMP2_HUMAN). Mmp2 (P33434; MMP2_MOUSE). Mmp2 (P33436; MMP2_RAT)	GALGLASY	MEROPS:M10.003	Endopeptidase (input)	-19.44	MEROPS score threshold (-22.7)	76	86.88		MMP2
LASYGAHGAQFPDAYGKE	Q2KI29	22	39	C-terminus	MMP2 (P08253; MMP2_HUMAN). Mmp2 (P33434; MMP2_MOUSE). Mmp2 (P33436; MMP2_RAT)	YGKELFDK	MEROPS:M10.003	Endopeptidase (input)	-22.42	MEROPS score threshold (-22.7)	76	86.88		MMP2
ETNSRLDSVLL	Q2KID0	99	109	C-terminus	MMP2 (P08253; MMP2_HUMAN). Mmp2 (P33434; MMP2_MOUSE). Mmp2 (P33436; MMP2_RAT)	SVLLLSSM	MEROPS:M10.003	Endopeptidase (input)	-21.3	MEROPS score threshold (-22.7)	76	86.88		MMP2
DCRLFEDTLVN	Q2HJ93	278	288	C-terminus	MMP2 (P08253; MMP2_HUMAN). Mmp2 (P33434; MMP2_MOUSE). Mmp2 (P33436; MMP2_RAT)	TLVNFQAA	MEROPS:M10.003	Endopeptidase (input)	-20.77	MEROPS score threshold (-22.7)	76	86.88		MMP2
ASTFLSPAFPGSQT	Q2LGB3	139	152	N-terminus	MMP2 (P08253; MMP2_HUMAN). Mmp2 (P33434; MMP2_MOUSE). Mmp2 (P33436; MMP2_RAT)	LPSLASTF	MEROPS:M10.003	Endopeptidase (input)	-21.95	MEROPS score threshold (-22.7)	76	86.88		MMP2
STFSHFSLFHMAAN	Q2KHV4	210	223	C-terminus	MMP2 (P08253; MMP2_HUMAN). Mmp2 (P33434; MMP2_MOUSE). Mmp2 (P33436; MMP2_RAT)	MAANMYVL	MEROPS:M10.003	Endopeptidase (input)	-21.55	MEROPS score threshold (-22.7)	76	86.88		MMP2
AVGGSGSGSTSGCGSAS	Q2T9W9	31	47	N-terminus	MMP2 (P08253; MMP2_HUMAN). Mmp2 (P33434; MMP2_MOUSE). Mmp2 (P33436; MMP2_RAT)	DLVPAVGG	MEROPS:M10.003	Endopeptidase (input)	-21.14	MEROPS score threshold (-22.7)	76	86.88		MMP2
GPRVKDGGALGTKAAQ	Q2HJ91	267	282	C-terminus	MMP2 (P08253; MMP2_HUMAN). Mmp2 (P33434; MMP2_MOUSE). Mmp2 (P33436; MMP2_RAT)	KAAQAKAA	MEROPS:M10.003	Endopeptidase (input)	-20.04	MEROPS score threshold (-22.7)	76	86.88		MMP2
LMLADNGVCC	Q2KIZ8	449	458	N-terminus	MMP2 (P08253; MMP2_HUMAN). Mmp2 (P33434; MMP2_MOUSE). Mmp2 (P33436; MMP2_RAT)	EAGALMLA	MEROPS:M10.003	Endopeptidase (input)	-19.43	MEROPS score threshold (-22.7)	76	86.88		MMP2
AFLHYRDPAEAQQAIAC	Q2KI24	321	337	C-terminus	MMP2 (P08253; MMP2_HUMAN). Mmp2 (P33434; MMP2_MOUSE). Mmp2 (P33436; MMP2_RAT)	AIACLQGF	MEROPS:M10.003	Endopeptidase (input)	-19.92	MEROPS score threshold (-22.7)	76	86.88		MMP2
MNGKDLSAGAVSAVRC	Q32LE5	82	97	C-terminus	MMP2 (P08253; MMP2_HUMAN). Mmp2 (P33434; MMP2_MOUSE). Mmp2 (P33436; MMP2_RAT)	AVRCIANP	MEROPS:M10.003	Endopeptidase (input)	-22.17	MEROPS score threshold (-22.7)	76	86.88		MMP2
AKQGLKKPVRGKQA	Q2YDJ8	153	166	N-terminus	MMP2 (P08253; MMP2_HUMAN). Mmp2 (P33434; MMP2_MOUSE). Mmp2 (P33436; MMP2_RAT)	NAAAAKQG	MEROPS:M10.003	Endopeptidase (input)	-21.06	MEROPS score threshold (-22.7)	76	86.88		MMP2
LPSLLLGTLLTFTSG	Q2TBI0	1	22	C-terminus	MMP2 (P08253; MMP2_HUMAN). Mmp2 (P33434; MMP2_MOUSE). Mmp2 (P33436; MMP2_RAT)	FTSGALGA	MEROPS:M10.003	Endopeptidase (input)	-20.5	MEROPS score threshold (-22.7)	76	86.88		MMP2
KMAEEELMTPKQ	Q32KS2	173	184	N-terminus	MMP2 (P08253; MMP2_HUMAN). Mmp2 (P33434; MMP2_MOUSE). Mmp2 (P33436; MMP2_RAT)	EASEKMAE	MEROPS:M10.003	Endopeptidase (input)	-21.75	MEROPS score threshold (-22.7)	76	86.88		MMP2
GRGRSVSGGRGRGGPRG	Q2TBT7	444	460	C-terminus	MMP2 (P08253; MMP2_HUMAN). Mmp2 (P33434; MMP2_MOUSE). Mmp2 (P33436; MMP2_RAT)	GPRGGKSS	MEROPS:M10.003	Endopeptidase (input)	-20.01	MEROPS score threshold (-22.7)	76	86.88		MMP2
VPAVSSVSHTA	Q32S26	215	225	C-terminus	MMP2 (P08253; MMP2_HUMAN). Mmp2 (P33434; MMP2_MOUSE). Mmp2 (P33436; MMP2_RAT)	SHTALYTP	MEROPS:M10.003	Endopeptidase (input)	-22.24	MEROPS score threshold (-22.7)	76	86.88		MMP2
REPKLSENIKNAMLIKG	Q2YDN6	22	38	C-terminus	MMP2 (P08253; MMP2_HUMAN). Mmp2 (P33434; MMP2_MOUSE). Mmp2 (P33436; MMP2_RAT)	LIKGGNAN	MEROPS:M10.003	Endopeptidase (input)	-22.4	MEROPS score threshold (-22.7)	76	86.88		MMP2
MSPVITFGGLLGEATEGR	Q32LP4	520	537	C-terminus	MMP2 (P08253; MMP2_HUMAN). Mmp2 (P33434; MMP2_MOUSE). Mmp2 (P33436; MMP2_RAT)	TEGRISAI	MEROPS:M10.003	Endopeptidase (input)	-22.49	MEROPS score threshold (-22.7)	76	86.88		MMP2
GNQRELARQKNMKKSQE	Q32P76	4	20	C-terminus	MMP2 (P08253; MMP2_HUMAN). Mmp2 (P33434; MMP2_MOUSE). Mmp2 (P33436; MMP2_RAT)	KSQEISKG	MEROPS:M10.003	Endopeptidase (input)	-21.64	MEROPS score threshold (-22.7)	76	86.88		MMP2
GEAANPKPLGVSEEKDQEP	Q32LK9	302	320	N-terminus	MMP2 (P08253; MMP2_HUMAN). Mmp2 (P33434; MMP2_MOUSE). Mmp2 (P33436; MMP2_RAT)	EAGLGEAA	MEROPS:M10.003	Endopeptidase (input)	-22.6	MEROPS score threshold (-22.7)	76	86.88		MMP2
LRAEKERSLVDGKSQEKE	Q32KY1	567	584	N-terminus	MMP2 (P08253; MMP2_HUMAN). Mmp2 (P33434; MMP2_MOUSE). Mmp2 (P33436; MMP2_RAT)	EPLDLRAE	MEROPS:M10.003	Endopeptidase (input)	-19.2	MEROPS score threshold (-22.7)	76	86.88		MMP2
QVALENANAVSEGVVHEDL	Q3SZ63	58	76	N-terminus	MMP2 (P08253; MMP2_HUMAN). Mmp2 (P33434; MMP2_MOUSE). Mmp2 (P33436; MMP2_RAT)	FSSSQVAL	MEROPS:M10.003	Endopeptidase (input)	-20.56	MEROPS score threshold (-22.7)	76	86.88		MMP2
DLPDGGHLTHGYMSDVKR	Q3SZ20	165	182	C-terminus	MMP2 (P08253; MMP2_HUMAN). Mmp2 (P33434; MMP2_MOUSE). Mmp2 (P33436; MMP2_RAT)	DVKRISAT	MEROPS:M10.003	Endopeptidase (input)	-21.01	MEROPS score threshold (-22.7)	76	86.88		MMP2
GYGDVGKGCAQALR	Q3MHL4	220	233	N-terminus	MMP2 (P08253; MMP2_HUMAN). Mmp2 (P33434; MMP2_MOUSE). Mmp2 (P33436; MMP2_RAT)	AVVAGYGD	MEROPS:M10.003	Endopeptidase (input)	-21.76	MEROPS score threshold (-22.7)	76	86.88		MMP2
LTVTSPVLMWVQ	Q3SYZ6	59	70	N-terminus	MMP2 (P08253; MMP2_HUMAN). Mmp2 (P33434; MMP2_MOUSE). Mmp2 (P33436; MMP2_RAT)	HKDGLTVT	MEROPS:M10.003	Endopeptidase (input)	-22.47	MEROPS score threshold (-22.7)	76	86.88		MMP2
SAADAQAIADMAAYQLEL	Q3SZC2	68	85	N-terminus	MMP2 (P08253; MMP2_HUMAN). Mmp2 (P33434; MMP2_MOUSE). Mmp2 (P33436; MMP2_RAT)	ALSGSAAD	MEROPS:M10.003	Endopeptidase (input)	-19.56	MEROPS score threshold (-22.7)	76	86.88		MMP2
LASGEGAAAGLPALD	Q3SX44	23	37	N-terminus	MMP2 (P08253; MMP2_HUMAN). Mmp2 (P33434; MMP2_MOUSE). Mmp2 (P33436; MMP2_RAT)	VPESLASG	MEROPS:M10.003	Endopeptidase (input)	-17.71	MEROPS score threshold (-22.7)	76	86.88		MMP2
LASGEGAAAGLPALD	Q3SX44	23	37	C-terminus	MMP2 (P08253; MMP2_HUMAN). Mmp2 (P33434; MMP2_MOUSE). Mmp2 (P33436; MMP2_RAT)	PALDLAKA	MEROPS:M10.003	Endopeptidase (input)	-19.75	MEROPS score threshold (-22.7)	76	86.88		MMP2
GPCSAGAPALGGRREPKK	Q3SYZ2	21	38	C-terminus	MMP2 (P08253; MMP2_HUMAN). Mmp2 (P33434; MMP2_MOUSE). Mmp2 (P33436; MMP2_RAT)	EPKKYAVT	MEROPS:M10.003	Endopeptidase (input)	-22.2	MEROPS score threshold (-22.7)	76	86.88		MMP2
FRSPAAPSPLALRQ	Q3MHV6	461	474	N-terminus	MMP2 (P08253; MMP2_HUMAN). Mmp2 (P33434; MMP2_MOUSE). Mmp2 (P33436; MMP2_RAT)	SPGKFRSP	MEROPS:M10.003	Endopeptidase (input)	-20.89	MEROPS score threshold (-22.7)	76	86.88		MMP2
VSFHMEYSCGTAAIRG	Q3MHZ2	124	139	C-terminus	MMP2 (P08253; MMP2_HUMAN). Mmp2 (P33434; MMP2_MOUSE). Mmp2 (P33436; MMP2_RAT)	AIRGTKEL	MEROPS:M10.003	Endopeptidase (input)	-21.93	MEROPS score threshold (-22.7)	76	86.88		MMP2
QSPAAGAPKVLLLSG	Q3SZZ2	8	22	C-terminus	MMP2 (P08253; MMP2_HUMAN). Mmp2 (P33434; MMP2_MOUSE). Mmp2 (P33436; MMP2_RAT)	LLSGQPAA	MEROPS:M10.003	Endopeptidase (input)	-21.62	MEROPS score threshold (-22.7)	76	86.88		MMP2
LSAGENVLPSTMQPGDD	Q58DA4	141	157	N-terminus	MMP2 (P08253; MMP2_HUMAN). Mmp2 (P33434; MMP2_MOUSE). Mmp2 (P33436; MMP2_RAT)	FFVSLSAG	MEROPS:M10.003	Endopeptidase (input)	-20.55	MEROPS score threshold (-22.7)	76	86.88		MMP2
LSAGENVLPSTMQPGDD	Q58DA4	141	157	C-terminus	MMP2 (P08253; MMP2_HUMAN). Mmp2 (P33434; MMP2_MOUSE). Mmp2 (P33436; MMP2_RAT)	PGDDVVSN	MEROPS:M10.003	Endopeptidase (input)	-22.37	MEROPS score threshold (-22.7)	76	86.88		MMP2
LLRGEVVPASSEARKK	Q3ZC80	258	273	N-terminus	MMP2 (P08253; MMP2_HUMAN). Mmp2 (P33434; MMP2_MOUSE). Mmp2 (P33436; MMP2_RAT)	AVYGLLRG	MEROPS:M10.003	Endopeptidase (input)	-21.28	MEROPS score threshold (-22.7)	76	86.88		MMP2
VYSVVLAAGLPLNALA	Q3ZC80	27	42	C-terminus	MMP2 (P08253; MMP2_HUMAN). Mmp2 (P33434; MMP2_MOUSE). Mmp2 (P33436; MMP2_RAT)	NALALWVF	MEROPS:M10.003	Endopeptidase (input)	-21.87	MEROPS score threshold (-22.7)	76	86.88		MMP2
QLHTLDTDLHSLAQIGGKS	Q5BIM2	182	200	C-terminus	MMP2 (P08253; MMP2_HUMAN). Mmp2 (P33434; MMP2_MOUSE). Mmp2 (P33436; MMP2_RAT)	GGKSLVSG	MEROPS:M10.003	Endopeptidase (input)	-18.58	MEROPS score threshold (-22.7)	76	86.88		MMP2
CYGALAAIPGLRPIHPSG	Q58CZ9	346	363	C-terminus	MMP2 (P08253; MMP2_HUMAN). Mmp2 (P33434; MMP2_MOUSE). Mmp2 (P33436; MMP2_RAT)	HPSGAMYL	MEROPS:M10.003	Endopeptidase (input)	-22.49	MEROPS score threshold (-22.7)	76	86.88		MMP2
GLKGGGVCFNSQPSS	Q3ZBG8	119	133	C-terminus	MMP2 (P08253; MMP2_HUMAN). Mmp2 (P33434; MMP2_MOUSE). Mmp2 (P33436; MMP2_RAT)	QPSSETEK	MEROPS:M10.003	Endopeptidase (input)	-22.08	MEROPS score threshold (-22.7)	76	86.88		MMP2
EALSVAKMQVEMGA	Q4JIJ3	397	410	C-terminus	MMP2 (P08253; MMP2_HUMAN). Mmp2 (P33434; MMP2_MOUSE). Mmp2 (P33436; MMP2_RAT)	EMGAQVLD	MEROPS:M10.003	Endopeptidase (input)	-21.76	MEROPS score threshold (-22.7)	76	86.88		MMP2
LNIAASAAVQAA	Q3ZCI8	126	137	N-terminus	MMP2 (P08253; MMP2_HUMAN). Mmp2 (P33434; MMP2_MOUSE). Mmp2 (P33436; MMP2_RAT)	GKRGLNIA	MEROPS:M10.003	Endopeptidase (input)	-21.91	MEROPS score threshold (-22.7)	76	86.88		MMP2
LNIAASAAVQAA	Q3ZCI8	126	137	C-terminus	MMP2 (P08253; MMP2_HUMAN). Mmp2 (P33434; MMP2_MOUSE). Mmp2 (P33436; MMP2_RAT)	VQAATKSQ	MEROPS:M10.003	Endopeptidase (input)	-21.7	MEROPS score threshold (-22.7)	76	86.88		MMP2
ASEGGAEDGASGVGGSA	Q59HJ6	86	102	C-terminus	MMP2 (P08253; MMP2_HUMAN). Mmp2 (P33434; MMP2_MOUSE). Mmp2 (P33436; MMP2_RAT)	GGSAGGGE	MEROPS:M10.003	Endopeptidase (input)	-21.57	MEROPS score threshold (-22.7)	76	86.88		MMP2
RHRSGMVTAA	Q3ZBI5	20	29	C-terminus	MMP2 (P08253; MMP2_HUMAN). Mmp2 (P33434; MMP2_MOUSE). Mmp2 (P33436; MMP2_RAT)	VTAASQGG	MEROPS:M10.003	Endopeptidase (input)	-20.76	MEROPS score threshold (-22.7)	76	86.88		MMP2
YLPIGGKLTPQSP	Q58DL5	342	354	C-terminus	MMP2 (P08253; MMP2_HUMAN). Mmp2 (P33434; MMP2_MOUSE). Mmp2 (P33436; MMP2_RAT)	PQSPSVGT	MEROPS:M10.003	Endopeptidase (input)	-21.98	MEROPS score threshold (-22.7)	76	86.88		MMP2
SMGYVQAMKPPGAQG	Q58CN7	56	70	C-terminus	MMP2 (P08253; MMP2_HUMAN). Mmp2 (P33434; MMP2_MOUSE). Mmp2 (P33436; MMP2_RAT)	GAQGSQST	MEROPS:M10.003	Endopeptidase (input)	-21.02	MEROPS score threshold (-22.7)	76	86.88		MMP2
LVLLSLDYLTSLF	Q58DD2	383	395	N-terminus	MMP2 (P08253; MMP2_HUMAN). Mmp2 (P33434; MMP2_MOUSE). Mmp2 (P33436; MMP2_RAT)	MTGALVLL	MEROPS:M10.003	Endopeptidase (input)	-20.12	MEROPS score threshold (-22.7)	76	86.88		MMP2
AIIIGFGQIKNLLGLQH	Q58DD2	158	174	N-terminus	MMP2 (P08253; MMP2_HUMAN). Mmp2 (P33434; MMP2_MOUSE). Mmp2 (P33436; MMP2_RAT)	TSAAAIII	MEROPS:M10.003	Endopeptidase (input)	-22.59	MEROPS score threshold (-22.7)	76	86.88		MMP2
HPGSLVEKLPDSPA	Q58CP9	562	575	C-terminus	MMP2 (P08253; MMP2_HUMAN). Mmp2 (P33434; MMP2_MOUSE). Mmp2 (P33436; MMP2_RAT)	DSPALAKK	MEROPS:M10.003	Endopeptidase (input)	-21.78	MEROPS score threshold (-22.7)	76	86.88		MMP2
GWEYAFEGTAGRF	Q3T110	126	138	C-terminus	MMP2 (P08253; MMP2_HUMAN). Mmp2 (P33434; MMP2_MOUSE). Mmp2 (P33436; MMP2_RAT)	AGRFLTDS	MEROPS:M10.003	Endopeptidase (input)	-22.14	MEROPS score threshold (-22.7)	76	86.88		MMP2
VKAVASVLGRSNP	Q5EA59	191	203	N-terminus	MMP2 (P08253; MMP2_HUMAN). Mmp2 (P33434; MMP2_MOUSE). Mmp2 (P33436; MMP2_RAT)	PPTWVKAV	MEROPS:M10.003	Endopeptidase (input)	-21.79	MEROPS score threshold (-22.7)	76	86.88		MMP2
VKAVASVLGRSNP	Q5EA59	191	203	C-terminus	MMP2 (P08253; MMP2_HUMAN). Mmp2 (P33434; MMP2_MOUSE). Mmp2 (P33436; MMP2_RAT)	RSNPLAVL	MEROPS:M10.003	Endopeptidase (input)	-21.19	MEROPS score threshold (-22.7)	76	86.88		MMP2
VFAQADGSAYIEQGNTKA	Q7YRA3	31	48	C-terminus	MMP2 (P08253; MMP2_HUMAN). Mmp2 (P33434; MMP2_MOUSE). Mmp2 (P33436; MMP2_RAT)	NTKALAVV	MEROPS:M10.003	Endopeptidase (input)	-20.75	MEROPS score threshold (-22.7)	76	86.88		MMP2
AGPKGSTGAQG	Q5I2E5	87	97	C-terminus	MMP2 (P08253; MMP2_HUMAN). Mmp2 (P33434; MMP2_MOUSE). Mmp2 (P33436; MMP2_RAT)	GAQGEKGA	MEROPS:M10.003	Endopeptidase (input)	-20.64	MEROPS score threshold (-22.7)	76	86.88		MMP2
AAAAAAAGPGSPGAAAVVK	Q6VFT7	229	247	N-terminus	MMP2 (P08253; MMP2_HUMAN). Mmp2 (P33434; MMP2_MOUSE). Mmp2 (P33436; MMP2_RAT)	AAAAAAAA	MEROPS:M10.003	Endopeptidase (input)	-18.71	MEROPS score threshold (-22.7)	76	86.88		MMP2
AAAAAAAGPGSPGAAAVVK	Q6VFT7	229	247	C-terminus	MMP2 (P08253; MMP2_HUMAN). Mmp2 (P33434; MMP2_MOUSE). Mmp2 (P33436; MMP2_RAT)	AVVKGLAG	MEROPS:M10.003	Endopeptidase (input)	-21.69	MEROPS score threshold (-22.7)	76	86.88		MMP2
REVELGLDYGTPTMN	Q8MJK1	32	46	C-terminus	MMP2 (P08253; MMP2_HUMAN). Mmp2 (P33434; MMP2_MOUSE). Mmp2 (P33436; MMP2_RAT)	PTMNLAGQ	MEROPS:M10.003	Endopeptidase (input)	-21.49	MEROPS score threshold (-22.7)	76	86.88		MMP2
ATAVGMNMLTKRAPP	Q5EA43	159	173	C-terminus	MMP2 (P08253; MMP2_HUMAN). Mmp2 (P33434; MMP2_MOUSE). Mmp2 (P33436; MMP2_RAT)	RAPPLVGR	MEROPS:M10.003	Endopeptidase (input)	-21.31	MEROPS score threshold (-22.7)	76	86.88		MMP2
GALIGGVVGGPIGLLA	Q5E9Y2	236	251	N-terminus	MMP2 (P08253; MMP2_HUMAN). Mmp2 (P33434; MMP2_MOUSE). Mmp2 (P33436; MMP2_RAT)	LPVAGALI	MEROPS:M10.003	Endopeptidase (input)	-22.41	MEROPS score threshold (-22.7)	76	86.88		MMP2
GALIGGVVGGPIGLLA	Q5E9Y2	236	251	C-terminus	MMP2 (P08253; MMP2_HUMAN). Mmp2 (P33434; MMP2_MOUSE). Mmp2 (P33436; MMP2_RAT)	GLLAGFKV	MEROPS:M10.003	Endopeptidase (input)	-22.45	MEROPS score threshold (-22.7)	76	86.88		MMP2
SQGSVPEPLN	Q5E9J8	101	110	N-terminus	MMP2 (P08253; MMP2_HUMAN). Mmp2 (P33434; MMP2_MOUSE). Mmp2 (P33436; MMP2_RAT)	GISASQGS	MEROPS:M10.003	Endopeptidase (input)	-19.89	MEROPS score threshold (-22.7)	76	86.88		MMP2
LPQLEPAEEAARLHAE	Q5QQ49	789	804	N-terminus	MMP2 (P08253; MMP2_HUMAN). Mmp2 (P33434; MMP2_MOUSE). Mmp2 (P33436; MMP2_RAT)	GILNLPQL	MEROPS:M10.003	Endopeptidase (input)	-22.3	MEROPS score threshold (-22.7)	76	86.88		MMP2
LPQLEPAEEAARLHAE	Q5QQ49	789	804	C-terminus	MMP2 (P08253; MMP2_HUMAN). Mmp2 (P33434; MMP2_MOUSE). Mmp2 (P33436; MMP2_RAT)	LHAELTGP	MEROPS:M10.003	Endopeptidase (input)	-18.5	MEROPS score threshold (-22.7)	76	86.88		MMP2
LTKFFYAISSSKSSNV	Q5BIM9	363	378	N-terminus	MMP2 (P08253; MMP2_HUMAN). Mmp2 (P33434; MMP2_MOUSE). Mmp2 (P33436; MMP2_RAT)	LLITLTKF	MEROPS:M10.003	Endopeptidase (input)	-21.93	MEROPS score threshold (-22.7)	76	86.88		MMP2
FGSRSLYNLGGSKR	Q5XQN5	60	73	N-terminus	MMP2 (P08253; MMP2_HUMAN). Mmp2 (P33434; MMP2_MOUSE). Mmp2 (P33436; MMP2_RAT)	GAGGFGSR	MEROPS:M10.003	Endopeptidase (input)	-21.58	MEROPS score threshold (-22.7)	76	86.88		MMP2
GMGPDTAPQA	Q5E9V5	134	143	C-terminus	MMP2 (P08253; MMP2_HUMAN). Mmp2 (P33434; MMP2_MOUSE). Mmp2 (P33436; MMP2_RAT)	APQAQVRV	MEROPS:M10.003	Endopeptidase (input)	-21.45	MEROPS score threshold (-22.7)	76	86.88		MMP2
SAVWGPLGEC	Q5E966	151	160	C-terminus	MMP2 (P08253; MMP2_HUMAN). Mmp2 (P33434; MMP2_MOUSE). Mmp2 (P33436; MMP2_RAT)	LGECIIAG	MEROPS:M10.003	Endopeptidase (input)	-21.85	MEROPS score threshold (-22.7)	76	86.88		MMP2
PASGLAALAKV	Q71SP7	334	344	C-terminus	MMP2 (P08253; MMP2_HUMAN). Mmp2 (P33434; MMP2_MOUSE). Mmp2 (P33436; MMP2_RAT)	LAKVLLSL	MEROPS:M10.003	Endopeptidase (input)	-19.55	MEROPS score threshold (-22.7)	76	86.88		MMP2
EGDTPQHLSPVQLLHQLQA	Q8MJ05	1074	1092	C-terminus	MMP2 (P08253; MMP2_HUMAN). Mmp2 (P33434; MMP2_MOUSE). Mmp2 (P33436; MMP2_RAT)	QLQALVPS	MEROPS:M10.003	Endopeptidase (input)	-20.28	MEROPS score threshold (-22.7)	76	86.88		MMP2
NGGLPQTTSEKS	Q8MJ05	562	573	C-terminus	MMP2 (P08253; MMP2_HUMAN). Mmp2 (P33434; MMP2_MOUSE). Mmp2 (P33436; MMP2_RAT)	SEKSIVEE	MEROPS:M10.003	Endopeptidase (input)	-22.28	MEROPS score threshold (-22.7)	76	86.88		MMP2
LNSGTNPIIYTLSNKE	Q5E9P3	302	317	N-terminus	MMP2 (P08253; MMP2_HUMAN). Mmp2 (P33434; MMP2_MOUSE). Mmp2 (P33436; MMP2_RAT)	VLAVLNSG	MEROPS:M10.003	Endopeptidase (input)	-19.75	MEROPS score threshold (-22.7)	76	86.88		MMP2
LKEISSTSQTLLYT	Q8MJ08	391	404	N-terminus	MMP2 (P08253; MMP2_HUMAN). Mmp2 (P33434; MMP2_MOUSE). Mmp2 (P33436; MMP2_RAT)	LSRELKEI	MEROPS:M10.003	Endopeptidase (input)	-20.86	MEROPS score threshold (-22.7)	76	86.88		MMP2
QGAGMQGASIQGGGQPGG	Q8HXM1	500	517	N-terminus	MMP2 (P08253; MMP2_HUMAN). Mmp2 (P33434; MMP2_MOUSE). Mmp2 (P33436; MMP2_RAT)	VPVMQGAG	MEROPS:M10.003	Endopeptidase (input)	-22.44	MEROPS score threshold (-22.7)	76	86.88		MMP2
QGAGMQGASIQGGGQPGG	Q8HXM1	500	517	C-terminus	MMP2 (P08253; MMP2_HUMAN). Mmp2 (P33434; MMP2_MOUSE). Mmp2 (P33436; MMP2_RAT)	QPGGFSPG	MEROPS:M10.003	Endopeptidase (input)	-21.45	MEROPS score threshold (-22.7)	76	86.88		MMP2
VAKEAQYEFEFAARQFM	Q8SQG8	174	190	N-terminus	MMP2 (P08253; MMP2_HUMAN). Mmp2 (P33434; MMP2_MOUSE). Mmp2 (P33436; MMP2_RAT)	PPERVAKE	MEROPS:M10.003	Endopeptidase (input)	-21.71	MEROPS score threshold (-22.7)	76	86.88		MMP2
LQAPFTDCGDGPML	Q9TU34	523	536	N-terminus	MMP2 (P08253; MMP2_HUMAN). Mmp2 (P33434; MMP2_MOUSE). Mmp2 (P33436; MMP2_RAT)	IFKLLQAP	MEROPS:M10.003	Endopeptidase (input)	-21.66	MEROPS score threshold (-22.7)	76	86.88		MMP2
WGIQPRLLLPTVPVSGSR	Q9TT93	18	35	C-terminus	MMP2 (P08253; MMP2_HUMAN). Mmp2 (P33434; MMP2_MOUSE). Mmp2 (P33436; MMP2_RAT)	SGSRLVWL	MEROPS:M10.003	Endopeptidase (input)	-22.04	MEROPS score threshold (-22.7)	76	86.88		MMP2
LNVHMNPPQVKAT	Q95115	360	372	N-terminus	MMP2 (P08253; MMP2_HUMAN). Mmp2 (P33434; MMP2_MOUSE). Mmp2 (P33436; MMP2_RAT)	VGGKLNVH	MEROPS:M10.003	Endopeptidase (input)	-22.08	MEROPS score threshold (-22.7)	76	86.88		MMP2
LNVHMNPPQVKAT	Q95115	360	372	C-terminus	MMP2 (P08253; MMP2_HUMAN). Mmp2 (P33434; MMP2_MOUSE). Mmp2 (P33436; MMP2_RAT)	VKATIISE	MEROPS:M10.003	Endopeptidase (input)	-20.77	MEROPS score threshold (-22.7)	76	86.88		MMP2
TPPAPAPTSGIVGA	Q95107	457	470	C-terminus	MMP2 (P08253; MMP2_HUMAN). Mmp2 (P33434; MMP2_MOUSE). Mmp2 (P33436; MMP2_RAT)	IVGALMEV	MEROPS:M10.003	Endopeptidase (input)	-19.22	MEROPS score threshold (-22.7)	76	86.88		MMP2
LGDPAGGSTPPARQ	Q9MZL7	532	545	N-terminus	MMP2 (P08253; MMP2_HUMAN). Mmp2 (P33434; MMP2_MOUSE). Mmp2 (P33436; MMP2_RAT)	EGPGLGDP	MEROPS:M10.003	Endopeptidase (input)	-22.13	MEROPS score threshold (-22.7)	76	86.88		MMP2
YLLTYMASFNLVYLFTVR	A4FUB8	117	134	N-terminus	Mmp12 (P34960; MMP12_MOUSE). MMP12 (P39900; MMP12_HUMAN). Mmp12 (Q63341; MMP12_RAT)	GAFAYLLT	MEROPS:M10.009	Endopeptidase (input)	-19.73	MEROPS score threshold (-22.75)	67	88.47		Mmp12
YLLTYMASFNLVYLFTVR	A4FUB8	117	134	N-terminus	Mmp13 (P23097; MMP13_RAT). Mmp13 (P33435; MMP13_MOUSE). MMP13 (P45452; MMP13_HUMAN)	GAFAYLLT	MEROPS:M10.013	Endopeptidase (input)	-23	MEROPS score threshold (-23.33)	70	93.66		Mmp13
YLLTYMASFNLVYLFTVR	A4FUB8	117	134	N-terminus	MMP14 (P50281; MMP14_HUMAN). Mmp14 (P53690; MMP14_MOUSE). Mmp14 (Q10739; MMP14_RAT)	GAFAYLLT	MEROPS:M10.014	Endopeptidase (input)	-21.61	MEROPS score threshold (-22.96)	75	80.66		MMP14
AVAGTAKNYNYNQQGPP	A2VE23	457	473	C-terminus	Mmp12 (P34960; MMP12_MOUSE). MMP12 (P39900; MMP12_HUMAN). Mmp12 (Q63341; MMP12_RAT)	QGPPAALG	MEROPS:M10.009	Endopeptidase (input)	-19.62	MEROPS score threshold (-22.75)	67	88.47		Mmp12
AVAGTAKNYNYNQQGPP	A2VE23	457	473	C-terminus	MMP14 (P50281; MMP14_HUMAN). Mmp14 (P53690; MMP14_MOUSE). Mmp14 (Q10739; MMP14_RAT)	QGPPAALG	MEROPS:M10.014	Endopeptidase (input)	-22.78	MEROPS score threshold (-22.96)	75	80.66		MMP14
PATFGHLAGG	A2VDQ5	619	628	C-terminus	Mmp12 (P34960; MMP12_MOUSE). MMP12 (P39900; MMP12_HUMAN). Mmp12 (Q63341; MMP12_RAT)	LAGGYDGQ	MEROPS:M10.009	Endopeptidase (input)	-18.98	MEROPS score threshold (-22.75)	67	88.47		Mmp12
PATFGHLAGG	A2VDQ5	619	628	C-terminus	Mmp13 (P23097; MMP13_RAT). Mmp13 (P33435; MMP13_MOUSE). MMP13 (P45452; MMP13_HUMAN)	LAGGYDGQ	MEROPS:M10.013	Endopeptidase (input)	-19.94	MEROPS score threshold (-23.33)	70	93.66		Mmp13
PATFGHLAGG	A2VDQ5	619	628	C-terminus	MMP14 (P50281; MMP14_HUMAN). Mmp14 (P53690; MMP14_MOUSE). Mmp14 (Q10739; MMP14_RAT)	LAGGYDGQ	MEROPS:M10.014	Endopeptidase (input)	-19.91	MEROPS score threshold (-22.96)	75	80.66		MMP14
AGKNEEPSSHHIPHGKE	A2VE10	225	241	N-terminus	Mmp12 (P34960; MMP12_MOUSE). MMP12 (P39900; MMP12_HUMAN). Mmp12 (Q63341; MMP12_RAT)	AENGAGKN	MEROPS:M10.009	Endopeptidase (input)	-22.02	MEROPS score threshold (-22.75)	67	88.47		Mmp12
LGSRPLSTAMPPPPG	A1A4J8	62	76	C-terminus	Mmp12 (P34960; MMP12_MOUSE). MMP12 (P39900; MMP12_HUMAN). Mmp12 (Q63341; MMP12_RAT)	PPPGSSGP	MEROPS:M10.009	Endopeptidase (input)	-18.22	MEROPS score threshold (-22.75)	67	88.47		Mmp12
LGSRPLSTAMPPPPG	A1A4J8	62	76	C-terminus	Mmp13 (P23097; MMP13_RAT). Mmp13 (P33435; MMP13_MOUSE). MMP13 (P45452; MMP13_HUMAN)	PPPGSSGP	MEROPS:M10.013	Endopeptidase (input)	-16.63	MEROPS score threshold (-23.33)	70	93.66		Mmp13
LGSRPLSTAMPPPPG	A1A4J8	62	76	C-terminus	MMP14 (P50281; MMP14_HUMAN). Mmp14 (P53690; MMP14_MOUSE). Mmp14 (Q10739; MMP14_RAT)	PPPGSSGP	MEROPS:M10.014	Endopeptidase (input)	-19.37	MEROPS score threshold (-22.96)	75	80.66		MMP14
DALVVPVGGGGMLAGIAVT	A0JNI4	178	196	N-terminus	Mmp12 (P34960; MMP12_MOUSE). MMP12 (P39900; MMP12_HUMAN). Mmp12 (Q63341; MMP12_RAT)	VPLVDALV	MEROPS:M10.009	Endopeptidase (input)	-21.3	MEROPS score threshold (-22.75)	67	88.47		Mmp12
DALVVPVGGGGMLAGIAVT	A0JNI4	178	196	C-terminus	Mmp12 (P34960; MMP12_MOUSE). MMP12 (P39900; MMP12_HUMAN). Mmp12 (Q63341; MMP12_RAT)	IAVTVKAL	MEROPS:M10.009	Endopeptidase (input)	-21.63	MEROPS score threshold (-22.75)	67	88.47		Mmp12
DALVVPVGGGGMLAGIAVT	A0JNI4	178	196	C-terminus	Mmp13 (P23097; MMP13_RAT). Mmp13 (P33435; MMP13_MOUSE). MMP13 (P45452; MMP13_HUMAN)	IAVTVKAL	MEROPS:M10.013	Endopeptidase (input)	-21.54	MEROPS score threshold (-23.33)	70	93.66		Mmp13
YTSSGCVLCAGPEP	A0JNJ4	60	73	N-terminus	MMP14 (P50281; MMP14_HUMAN). Mmp14 (P53690; MMP14_MOUSE). Mmp14 (Q10739; MMP14_RAT)	LLDRYTSS	MEROPS:M10.014	Endopeptidase (input)	-21.56	MEROPS score threshold (-22.96)	75	80.66		MMP14
YTSSGCVLCAGPEP	A0JNJ4	60	73	C-terminus	Mmp12 (P34960; MMP12_MOUSE). MMP12 (P39900; MMP12_HUMAN). Mmp12 (Q63341; MMP12_RAT)	GPEPVAPK	MEROPS:M10.009	Endopeptidase (input)	-18.8	MEROPS score threshold (-22.75)	67	88.47		Mmp12
YTSSGCVLCAGPEP	A0JNJ4	60	73	C-terminus	Mmp13 (P23097; MMP13_RAT). Mmp13 (P33435; MMP13_MOUSE). MMP13 (P45452; MMP13_HUMAN)	GPEPVAPK	MEROPS:M10.013	Endopeptidase (input)	-22.78	MEROPS score threshold (-23.33)	70	93.66		Mmp13
YTSSGCVLCAGPEP	A0JNJ4	60	73	C-terminus	MMP14 (P50281; MMP14_HUMAN). Mmp14 (P53690; MMP14_MOUSE). Mmp14 (Q10739; MMP14_RAT)	GPEPVAPK	MEROPS:M10.014	Endopeptidase (input)	-21.86	MEROPS score threshold (-22.96)	75	80.66		MMP14
SASSLGSGAPGP	A0JNJ4	253	264	N-terminus	Mmp13 (P23097; MMP13_RAT). Mmp13 (P33435; MMP13_MOUSE). MMP13 (P45452; MMP13_HUMAN)	SPSSSASS	MEROPS:M10.013	Endopeptidase (input)	-21.72	MEROPS score threshold (-23.33)	70	93.66		Mmp13
SASSLGSGAPGP	A0JNJ4	253	264	N-terminus	MMP14 (P50281; MMP14_HUMAN). Mmp14 (P53690; MMP14_MOUSE). Mmp14 (Q10739; MMP14_RAT)	SPSSSASS	MEROPS:M10.014	Endopeptidase (input)	-19.38	MEROPS score threshold (-22.96)	75	80.66		MMP14
SASSLGSGAPGP	A0JNJ4	253	264	C-terminus	Mmp12 (P34960; MMP12_MOUSE). MMP12 (P39900; MMP12_HUMAN). Mmp12 (Q63341; MMP12_RAT)	APGPVEVR	MEROPS:M10.009	Endopeptidase (input)	-19.96	MEROPS score threshold (-22.75)	67	88.47		Mmp12
SASSLGSGAPGP	A0JNJ4	253	264	C-terminus	Mmp13 (P23097; MMP13_RAT). Mmp13 (P33435; MMP13_MOUSE). MMP13 (P45452; MMP13_HUMAN)	APGPVEVR	MEROPS:M10.013	Endopeptidase (input)	-21.71	MEROPS score threshold (-23.33)	70	93.66		Mmp13
SASSLGSGAPGP	A0JNJ4	253	264	C-terminus	MMP14 (P50281; MMP14_HUMAN). Mmp14 (P53690; MMP14_MOUSE). Mmp14 (Q10739; MMP14_RAT)	APGPVEVR	MEROPS:M10.014	Endopeptidase (input)	-20.34	MEROPS score threshold (-22.96)	75	80.66		MMP14
SHADLAGVPLTGMNP	A4IFL0	27	41	N-terminus	Mmp12 (P34960; MMP12_MOUSE). MMP12 (P39900; MMP12_HUMAN). Mmp12 (Q63341; MMP12_RAT)	GAGYSHAD	MEROPS:M10.009	Endopeptidase (input)	-22.13	MEROPS score threshold (-22.75)	67	88.47		Mmp12
SHADLAGVPLTGMNP	A4IFL0	27	41	N-terminus	Mmp13 (P23097; MMP13_RAT). Mmp13 (P33435; MMP13_MOUSE). MMP13 (P45452; MMP13_HUMAN)	GAGYSHAD	MEROPS:M10.013	Endopeptidase (input)	-22.97	MEROPS score threshold (-23.33)	70	93.66		Mmp13
SHADLAGVPLTGMNP	A4IFL0	27	41	N-terminus	MMP14 (P50281; MMP14_HUMAN). Mmp14 (P53690; MMP14_MOUSE). Mmp14 (Q10739; MMP14_RAT)	GAGYSHAD	MEROPS:M10.014	Endopeptidase (input)	-22.53	MEROPS score threshold (-22.96)	75	80.66		MMP14
SRLATTAFCGSYA	A4FV52	204	216	N-terminus	MMP14 (P50281; MMP14_HUMAN). Mmp14 (P53690; MMP14_MOUSE). Mmp14 (Q10739; MMP14_RAT)	PLERSRLA	MEROPS:M10.014	Endopeptidase (input)	-20.39	MEROPS score threshold (-22.96)	75	80.66		MMP14
SRLATTAFCGSYA	A4FV52	204	216	C-terminus	Mmp12 (P34960; MMP12_MOUSE). MMP12 (P39900; MMP12_HUMAN). Mmp12 (Q63341; MMP12_RAT)	GSYAGAVV	MEROPS:M10.009	Endopeptidase (input)	-20.9	MEROPS score threshold (-22.75)	67	88.47		Mmp12
SRLATTAFCGSYA	A4FV52	204	216	C-terminus	MMP14 (P50281; MMP14_HUMAN). Mmp14 (P53690; MMP14_MOUSE). Mmp14 (Q10739; MMP14_RAT)	GSYAGAVV	MEROPS:M10.014	Endopeptidase (input)	-22.46	MEROPS score threshold (-22.96)	75	80.66		MMP14
RSAEGQWEAQPALES	A4FV37	214	228	N-terminus	Mmp12 (P34960; MMP12_MOUSE). MMP12 (P39900; MMP12_HUMAN). Mmp12 (Q63341; MMP12_RAT)	LGPGRSAE	MEROPS:M10.009	Endopeptidase (input)	-20.57	MEROPS score threshold (-22.75)	67	88.47		Mmp12
RSAEGQWEAQPALES	A4FV37	214	228	N-terminus	Mmp13 (P23097; MMP13_RAT). Mmp13 (P33435; MMP13_MOUSE). MMP13 (P45452; MMP13_HUMAN)	LGPGRSAE	MEROPS:M10.013	Endopeptidase (input)	-21.55	MEROPS score threshold (-23.33)	70	93.66		Mmp13
RSAEGQWEAQPALES	A4FV37	214	228	N-terminus	MMP14 (P50281; MMP14_HUMAN). Mmp14 (P53690; MMP14_MOUSE). Mmp14 (Q10739; MMP14_RAT)	LGPGRSAE	MEROPS:M10.014	Endopeptidase (input)	-20.7	MEROPS score threshold (-22.96)	75	80.66		MMP14
SLSPGAASSSSGDGDGKEG	A4FV57	133	151	N-terminus	MMP14 (P50281; MMP14_HUMAN). Mmp14 (P53690; MMP14_MOUSE). Mmp14 (Q10739; MMP14_RAT)	DETRSLSP	MEROPS:M10.014	Endopeptidase (input)	-22.86	MEROPS score threshold (-22.96)	75	80.66		MMP14
SLSPGAASSSSGDGDGKEG	A4FV57	133	151	C-terminus	Mmp12 (P34960; MMP12_MOUSE). MMP12 (P39900; MMP12_HUMAN). Mmp12 (Q63341; MMP12_RAT)	GKEGLEEP	MEROPS:M10.009	Endopeptidase (input)	-21.16	MEROPS score threshold (-22.75)	67	88.47		Mmp12
SLSPGAASSSSGDGDGKEG	A4FV57	133	151	C-terminus	MMP14 (P50281; MMP14_HUMAN). Mmp14 (P53690; MMP14_MOUSE). Mmp14 (Q10739; MMP14_RAT)	GKEGLEEP	MEROPS:M10.014	Endopeptidase (input)	-19.17	MEROPS score threshold (-22.96)	75	80.66		MMP14
SGLGDLPIHSLPHAIEDVP	A1A4R9	142	160	N-terminus	Mmp12 (P34960; MMP12_MOUSE). MMP12 (P39900; MMP12_HUMAN). Mmp12 (Q63341; MMP12_RAT)	HGLGSGLG	MEROPS:M10.009	Endopeptidase (input)	-20.53	MEROPS score threshold (-22.75)	67	88.47		Mmp12
SGLGDLPIHSLPHAIEDVP	A1A4R9	142	160	N-terminus	MMP14 (P50281; MMP14_HUMAN). Mmp14 (P53690; MMP14_MOUSE). Mmp14 (Q10739; MMP14_RAT)	HGLGSGLG	MEROPS:M10.014	Endopeptidase (input)	-21.65	MEROPS score threshold (-22.96)	75	80.66		MMP14
LVSRSSVSHS	A1L520	309	318	N-terminus	Mmp12 (P34960; MMP12_MOUSE). MMP12 (P39900; MMP12_HUMAN). Mmp12 (Q63341; MMP12_RAT)	LGMGLVSR	MEROPS:M10.009	Endopeptidase (input)	-19.9	MEROPS score threshold (-22.75)	67	88.47		Mmp12
LVSRSSVSHS	A1L520	309	318	N-terminus	Mmp13 (P23097; MMP13_RAT). Mmp13 (P33435; MMP13_MOUSE). MMP13 (P45452; MMP13_HUMAN)	LGMGLVSR	MEROPS:M10.013	Endopeptidase (input)	-21.18	MEROPS score threshold (-23.33)	70	93.66		Mmp13
LVSRSSVSHS	A1L520	309	318	N-terminus	MMP14 (P50281; MMP14_HUMAN). Mmp14 (P53690; MMP14_MOUSE). Mmp14 (Q10739; MMP14_RAT)	LGMGLVSR	MEROPS:M10.014	Endopeptidase (input)	-18.59	MEROPS score threshold (-22.96)	75	80.66		MMP14
LVSRSSVSHS	A1L520	309	318	C-terminus	MMP14 (P50281; MMP14_HUMAN). Mmp14 (P53690; MMP14_MOUSE). Mmp14 (Q10739; MMP14_RAT)	VSHSVLSE	MEROPS:M10.014	Endopeptidase (input)	-22.16	MEROPS score threshold (-22.96)	75	80.66		MMP14
MWRGSSAGGSQGAAME	A1L515	1	16	C-terminus	Mmp12 (P34960; MMP12_MOUSE). MMP12 (P39900; MMP12_HUMAN). Mmp12 (Q63341; MMP12_RAT)	AAMEGTGG	MEROPS:M10.009	Endopeptidase (input)	-20.33	MEROPS score threshold (-22.75)	67	88.47		Mmp12
MWRGSSAGGSQGAAME	A1L515	1	16	C-terminus	Mmp13 (P23097; MMP13_RAT). Mmp13 (P33435; MMP13_MOUSE). MMP13 (P45452; MMP13_HUMAN)	AAMEGTGG	MEROPS:M10.013	Endopeptidase (input)	-21.79	MEROPS score threshold (-23.33)	70	93.66		Mmp13
GGLGERVLGFCQLNLPSAK	A2VDL6	543	561	C-terminus	Mmp12 (P34960; MMP12_MOUSE). MMP12 (P39900; MMP12_HUMAN). Mmp12 (Q63341; MMP12_RAT)	PSAKFPRG	MEROPS:M10.009	Endopeptidase (input)	-22.39	MEROPS score threshold (-22.75)	67	88.47		Mmp12
GGLGERVLGFCQLNLPSAK	A2VDL6	543	561	C-terminus	MMP14 (P50281; MMP14_HUMAN). Mmp14 (P53690; MMP14_MOUSE). Mmp14 (Q10739; MMP14_RAT)	PSAKFPRG	MEROPS:M10.014	Endopeptidase (input)	-21.87	MEROPS score threshold (-22.96)	75	80.66		MMP14
LQLFSKQNRLTMTRNAV	A2VE08	217	233	N-terminus	Mmp12 (P34960; MMP12_MOUSE). MMP12 (P39900; MMP12_HUMAN). Mmp12 (Q63341; MMP12_RAT)	LPPLLQLF	MEROPS:M10.009	Endopeptidase (input)	-20.98	MEROPS score threshold (-22.75)	67	88.47		Mmp12
LQLFSKQNRLTMTRNAV	A2VE08	217	233	N-terminus	Mmp13 (P23097; MMP13_RAT). Mmp13 (P33435; MMP13_MOUSE). MMP13 (P45452; MMP13_HUMAN)	LPPLLQLF	MEROPS:M10.013	Endopeptidase (input)	-21.04	MEROPS score threshold (-23.33)	70	93.66		Mmp13
LQLFSKQNRLTMTRNAV	A2VE08	217	233	N-terminus	MMP14 (P50281; MMP14_HUMAN). Mmp14 (P53690; MMP14_MOUSE). Mmp14 (Q10739; MMP14_RAT)	LPPLLQLF	MEROPS:M10.014	Endopeptidase (input)	-19.7	MEROPS score threshold (-22.96)	75	80.66		MMP14
HSPKSQGSLSPSSNSAFS	A2VE02	728	745	N-terminus	Mmp12 (P34960; MMP12_MOUSE). MMP12 (P39900; MMP12_HUMAN). Mmp12 (Q63341; MMP12_RAT)	RPGAHSPK	MEROPS:M10.009	Endopeptidase (input)	-21.47	MEROPS score threshold (-22.75)	67	88.47		Mmp12
MAAPGARSCN	A4IF69	1	10	C-terminus	MMP14 (P50281; MMP14_HUMAN). Mmp14 (P53690; MMP14_MOUSE). Mmp14 (Q10739; MMP14_RAT)	RSCNLSGL	MEROPS:M10.014	Endopeptidase (input)	-20.25	MEROPS score threshold (-22.96)	75	80.66		MMP14
TVPMTGTKSGNE	A4IFA3	584	595	C-terminus	MMP14 (P50281; MMP14_HUMAN). Mmp14 (P53690; MMP14_MOUSE). Mmp14 (Q10739; MMP14_RAT)	SGNEIFLR	MEROPS:M10.014	Endopeptidase (input)	-22.11	MEROPS score threshold (-22.96)	75	80.66		MMP14
LNGILLQLISCLQ	A4FV14	300	312	N-terminus	MMP14 (P50281; MMP14_HUMAN). Mmp14 (P53690; MMP14_MOUSE). Mmp14 (Q10739; MMP14_RAT)	LGDRLNGI	MEROPS:M10.014	Endopeptidase (input)	-21.4	MEROPS score threshold (-22.96)	75	80.66		MMP14
VAPGPGLAPPAQPGAP	A2VE44	350	365	N-terminus	Mmp12 (P34960; MMP12_MOUSE). MMP12 (P39900; MMP12_HUMAN). Mmp12 (Q63341; MMP12_RAT)	LVSTVAPG	MEROPS:M10.009	Endopeptidase (input)	-21.87	MEROPS score threshold (-22.75)	67	88.47		Mmp12
VAPGPGLAPPAQPGAP	A2VE44	350	365	N-terminus	MMP14 (P50281; MMP14_HUMAN). Mmp14 (P53690; MMP14_MOUSE). Mmp14 (Q10739; MMP14_RAT)	LVSTVAPG	MEROPS:M10.014	Endopeptidase (input)	-22.92	MEROPS score threshold (-22.96)	75	80.66		MMP14
VAPGPGLAPPAQPGAP	A2VE44	350	365	C-terminus	Mmp12 (P34960; MMP12_MOUSE). MMP12 (P39900; MMP12_HUMAN). Mmp12 (Q63341; MMP12_RAT)	PGAPSMAG	MEROPS:M10.009	Endopeptidase (input)	-20.68	MEROPS score threshold (-22.75)	67	88.47		Mmp12
VAPGPGLAPPAQPGAP	A2VE44	350	365	C-terminus	MMP14 (P50281; MMP14_HUMAN). Mmp14 (P53690; MMP14_MOUSE). Mmp14 (Q10739; MMP14_RAT)	PGAPSMAG	MEROPS:M10.014	Endopeptidase (input)	-22.4	MEROPS score threshold (-22.96)	75	80.66		MMP14
VAPGPGLAPPAQPGAP	A2VE44	350	365	C-terminus	MMP20 (O60882; MMP20_HUMAN). Mmp20 (P57748; MMP20_MOUSE)	PGAPSMAG	MEROPS:M10.019	Endopeptidase (input)	-16.68	99th percentile (-17.5)	33	99.92		MMP20
LYSSKKKIFMGL	A2VE44	514	525	N-terminus	MMP14 (P50281; MMP14_HUMAN). Mmp14 (P53690; MMP14_MOUSE). Mmp14 (Q10739; MMP14_RAT)	VLMLLYSS	MEROPS:M10.014	Endopeptidase (input)	-22.52	MEROPS score threshold (-22.96)	75	80.66		MMP14
LPERASGGPEAADFSDR	A0JN53	1013	1029	N-terminus	MMP14 (P50281; MMP14_HUMAN). Mmp14 (P53690; MMP14_MOUSE). Mmp14 (Q10739; MMP14_RAT)	RLEFLPER	MEROPS:M10.014	Endopeptidase (input)	-21.24	MEROPS score threshold (-22.96)	75	80.66		MMP14
LPERASGGPEAADFSDR	A0JN53	1013	1029	C-terminus	MMP14 (P50281; MMP14_HUMAN). Mmp14 (P53690; MMP14_MOUSE). Mmp14 (Q10739; MMP14_RAT)	FSDRLSLG	MEROPS:M10.014	Endopeptidase (input)	-20.83	MEROPS score threshold (-22.96)	75	80.66		MMP14
VLLSGVIAFMVNLS	A4IFK2	227	240	N-terminus	MMP14 (P50281; MMP14_HUMAN). Mmp14 (P53690; MMP14_MOUSE). Mmp14 (Q10739; MMP14_RAT)	ALLMVLLS	MEROPS:M10.014	Endopeptidase (input)	-22.77	MEROPS score threshold (-22.96)	75	80.66		MMP14
AILNVGAPAAG	A1A4J1	403	413	C-terminus	Mmp12 (P34960; MMP12_MOUSE). MMP12 (P39900; MMP12_HUMAN). Mmp12 (Q63341; MMP12_RAT)	PAAGMNAA	MEROPS:M10.009	Endopeptidase (input)	-18.36	MEROPS score threshold (-22.75)	67	88.47		Mmp12
AILNVGAPAAG	A1A4J1	403	413	C-terminus	Mmp13 (P23097; MMP13_RAT). Mmp13 (P33435; MMP13_MOUSE). MMP13 (P45452; MMP13_HUMAN)	PAAGMNAA	MEROPS:M10.013	Endopeptidase (input)	-19.08	MEROPS score threshold (-23.33)	70	93.66		Mmp13
AILNVGAPAAG	A1A4J1	403	413	C-terminus	MMP14 (P50281; MMP14_HUMAN). Mmp14 (P53690; MMP14_MOUSE). Mmp14 (Q10739; MMP14_RAT)	PAAGMNAA	MEROPS:M10.014	Endopeptidase (input)	-19.87	MEROPS score threshold (-22.96)	75	80.66		MMP14
GDRTSTFCGTPEFLAPE	A1A4I4	771	787	C-terminus	Mmp13 (P23097; MMP13_RAT). Mmp13 (P33435; MMP13_MOUSE). MMP13 (P45452; MMP13_HUMAN)	LAPEVLTD	MEROPS:M10.013	Endopeptidase (input)	-21.32	MEROPS score threshold (-23.33)	70	93.66		Mmp13
GDRTSTFCGTPEFLAPE	A1A4I4	771	787	C-terminus	MMP14 (P50281; MMP14_HUMAN). Mmp14 (P53690; MMP14_MOUSE). Mmp14 (Q10739; MMP14_RAT)	LAPEVLTD	MEROPS:M10.014	Endopeptidase (input)	-22.53	MEROPS score threshold (-22.96)	75	80.66		MMP14
QRSLVLFSVGVVLAL	A0JNC3	85	99	C-terminus	MMP14 (P50281; MMP14_HUMAN). Mmp14 (P53690; MMP14_MOUSE). Mmp14 (Q10739; MMP14_RAT)	VLALVLNL	MEROPS:M10.014	Endopeptidase (input)	-22.74	MEROPS score threshold (-22.96)	75	80.66		MMP14
EHVFRHAAQELFG	A4FV58	321	333	C-terminus	Mmp13 (P23097; MMP13_RAT). Mmp13 (P33435; MMP13_MOUSE). MMP13 (P45452; MMP13_HUMAN)	ELFGIHVT	MEROPS:M10.013	Endopeptidase (input)	-22.81	MEROPS score threshold (-23.33)	70	93.66		Mmp13
EHVFRHAAQELFG	A4FV58	321	333	C-terminus	MMP14 (P50281; MMP14_HUMAN). Mmp14 (P53690; MMP14_MOUSE). Mmp14 (Q10739; MMP14_RAT)	ELFGIHVT	MEROPS:M10.014	Endopeptidase (input)	-22.34	MEROPS score threshold (-22.96)	75	80.66		MMP14
TGLSAAAPVLRR	A6H773	52	63	N-terminus	Mmp12 (P34960; MMP12_MOUSE). MMP12 (P39900; MMP12_HUMAN). Mmp12 (Q63341; MMP12_RAT)	RVGGTGLS	MEROPS:M10.009	Endopeptidase (input)	-19.9	MEROPS score threshold (-22.75)	67	88.47		Mmp12
TGLSAAAPVLRR	A6H773	52	63	N-terminus	MMP14 (P50281; MMP14_HUMAN). Mmp14 (P53690; MMP14_MOUSE). Mmp14 (Q10739; MMP14_RAT)	RVGGTGLS	MEROPS:M10.014	Endopeptidase (input)	-21.11	MEROPS score threshold (-22.96)	75	80.66		MMP14
TGLSAAAPVLRR	A6H773	52	63	C-terminus	Mmp13 (P23097; MMP13_RAT). Mmp13 (P33435; MMP13_MOUSE). MMP13 (P45452; MMP13_HUMAN)	VLRRVRAQ	MEROPS:M10.013	Endopeptidase (input)	-21.3	MEROPS score threshold (-23.33)	70	93.66		Mmp13
TGLSAAAPVLRR	A6H773	52	63	C-terminus	MMP14 (P50281; MMP14_HUMAN). Mmp14 (P53690; MMP14_MOUSE). Mmp14 (Q10739; MMP14_RAT)	VLRRVRAQ	MEROPS:M10.014	Endopeptidase (input)	-21.01	MEROPS score threshold (-22.96)	75	80.66		MMP14
QPSLQSSMTY	A5PJL1	179	188	N-terminus	MMP14 (P50281; MMP14_HUMAN). Mmp14 (P53690; MMP14_MOUSE). Mmp14 (Q10739; MMP14_RAT)	RPTLQPSL	MEROPS:M10.014	Endopeptidase (input)	-22.56	MEROPS score threshold (-22.96)	75	80.66		MMP14
YQAHSFVSAF	A5PJL1	100	109	C-terminus	Mmp12 (P34960; MMP12_MOUSE). MMP12 (P39900; MMP12_HUMAN). Mmp12 (Q63341; MMP12_RAT)	VSAFIGGL	MEROPS:M10.009	Endopeptidase (input)	-18.9	MEROPS score threshold (-22.75)	67	88.47		Mmp12
YQAHSFVSAF	A5PJL1	100	109	C-terminus	MMP14 (P50281; MMP14_HUMAN). Mmp14 (P53690; MMP14_MOUSE). Mmp14 (Q10739; MMP14_RAT)	VSAFIGGL	MEROPS:M10.014	Endopeptidase (input)	-22.89	MEROPS score threshold (-22.96)	75	80.66		MMP14
MPEPGPRMNGFS	A5PKD9	1	12	C-terminus	Mmp12 (P34960; MMP12_MOUSE). MMP12 (P39900; MMP12_HUMAN). Mmp12 (Q63341; MMP12_RAT)	NGFSLGEL	MEROPS:M10.009	Endopeptidase (input)	-21.07	MEROPS score threshold (-22.75)	67	88.47		Mmp12
MPEPGPRMNGFS	A5PKD9	1	12	C-terminus	MMP14 (P50281; MMP14_HUMAN). Mmp14 (P53690; MMP14_MOUSE). Mmp14 (Q10739; MMP14_RAT)	NGFSLGEL	MEROPS:M10.014	Endopeptidase (input)	-22.03	MEROPS score threshold (-22.96)	75	80.66		MMP14
AAAEAASSSMTKGKE	A6QP11	108	122	N-terminus	Mmp12 (P34960; MMP12_MOUSE). MMP12 (P39900; MMP12_HUMAN). Mmp12 (Q63341; MMP12_RAT)	SESGAAAE	MEROPS:M10.009	Endopeptidase (input)	-20.83	MEROPS score threshold (-22.75)	67	88.47		Mmp12
AAAEAASSSMTKGKE	A6QP11	108	122	N-terminus	Mmp13 (P23097; MMP13_RAT). Mmp13 (P33435; MMP13_MOUSE). MMP13 (P45452; MMP13_HUMAN)	SESGAAAE	MEROPS:M10.013	Endopeptidase (input)	-22.3	MEROPS score threshold (-23.33)	70	93.66		Mmp13
AAAEAASSSMTKGKE	A6QP11	108	122	N-terminus	MMP14 (P50281; MMP14_HUMAN). Mmp14 (P53690; MMP14_MOUSE). Mmp14 (Q10739; MMP14_RAT)	SESGAAAE	MEROPS:M10.014	Endopeptidase (input)	-22.13	MEROPS score threshold (-22.96)	75	80.66		MMP14
SRSTSTGSAASSGSNSS	A5D992	112	128	N-terminus	Mmp13 (P23097; MMP13_RAT). Mmp13 (P33435; MMP13_MOUSE). MMP13 (P45452; MMP13_HUMAN)	GPILSRST	MEROPS:M10.013	Endopeptidase (input)	-21.91	MEROPS score threshold (-23.33)	70	93.66		Mmp13
SRSTSTGSAASSGSNSS	A5D992	112	128	N-terminus	MMP14 (P50281; MMP14_HUMAN). Mmp14 (P53690; MMP14_MOUSE). Mmp14 (Q10739; MMP14_RAT)	GPILSRST	MEROPS:M10.014	Endopeptidase (input)	-21.91	MEROPS score threshold (-22.96)	75	80.66		MMP14
SRSTSTGSAASSGSNSS	A5D992	112	128	C-terminus	MMP14 (P50281; MMP14_HUMAN). Mmp14 (P53690; MMP14_MOUSE). Mmp14 (Q10739; MMP14_RAT)	SNSSASSE	MEROPS:M10.014	Endopeptidase (input)	-22.74	MEROPS score threshold (-22.96)	75	80.66		MMP14
SVPESWAKFTDDNILRSQS	A6H782	295	313	C-terminus	MMP14 (P50281; MMP14_HUMAN). Mmp14 (P53690; MMP14_MOUSE). Mmp14 (Q10739; MMP14_RAT)	RSQSERAA	MEROPS:M10.014	Endopeptidase (input)	-21.37	MEROPS score threshold (-22.96)	75	80.66		MMP14
AVGAMKELVER	A6QPE1	55	65	N-terminus	Mmp12 (P34960; MMP12_MOUSE). MMP12 (P39900; MMP12_HUMAN). Mmp12 (Q63341; MMP12_RAT)	QGVPAVGA	MEROPS:M10.009	Endopeptidase (input)	-19.52	MEROPS score threshold (-22.75)	67	88.47		Mmp12
AVGAMKELVER	A6QPE1	55	65	N-terminus	Mmp13 (P23097; MMP13_RAT). Mmp13 (P33435; MMP13_MOUSE). MMP13 (P45452; MMP13_HUMAN)	QGVPAVGA	MEROPS:M10.013	Endopeptidase (input)	-22.19	MEROPS score threshold (-23.33)	70	93.66		Mmp13
AVGAMKELVER	A6QPE1	55	65	N-terminus	MMP14 (P50281; MMP14_HUMAN). Mmp14 (P53690; MMP14_MOUSE). Mmp14 (Q10739; MMP14_RAT)	QGVPAVGA	MEROPS:M10.014	Endopeptidase (input)	-22.11	MEROPS score threshold (-22.96)	75	80.66		MMP14
AVGAMKELVER	A6QPE1	55	65	C-terminus	MMP14 (P50281; MMP14_HUMAN). Mmp14 (P53690; MMP14_MOUSE). Mmp14 (Q10739; MMP14_RAT)	LVERFALY	MEROPS:M10.014	Endopeptidase (input)	-21.57	MEROPS score threshold (-22.96)	75	80.66		MMP14
LPGKKVTTEDVE	A5D7R1	303	314	N-terminus	MMP14 (P50281; MMP14_HUMAN). Mmp14 (P53690; MMP14_MOUSE). Mmp14 (Q10739; MMP14_RAT)	LMESLPGK	MEROPS:M10.014	Endopeptidase (input)	-21.22	MEROPS score threshold (-22.96)	75	80.66		MMP14
LALRLSDPAAAPRE	A5PJD0	121	134	N-terminus	Mmp12 (P34960; MMP12_MOUSE). MMP12 (P39900; MMP12_HUMAN). Mmp12 (Q63341; MMP12_RAT)	FPFVLALR	MEROPS:M10.009	Endopeptidase (input)	-20.61	MEROPS score threshold (-22.75)	67	88.47		Mmp12
LALRLSDPAAAPRE	A5PJD0	121	134	C-terminus	Mmp12 (P34960; MMP12_MOUSE). MMP12 (P39900; MMP12_HUMAN). Mmp12 (Q63341; MMP12_RAT)	APRELARR	MEROPS:M10.009	Endopeptidase (input)	-19.99	MEROPS score threshold (-22.75)	67	88.47		Mmp12
LALRLSDPAAAPRE	A5PJD0	121	134	C-terminus	Mmp13 (P23097; MMP13_RAT). Mmp13 (P33435; MMP13_MOUSE). MMP13 (P45452; MMP13_HUMAN)	APRELARR	MEROPS:M10.013	Endopeptidase (input)	-20.58	MEROPS score threshold (-23.33)	70	93.66		Mmp13
LALRLSDPAAAPRE	A5PJD0	121	134	C-terminus	MMP14 (P50281; MMP14_HUMAN). Mmp14 (P53690; MMP14_MOUSE). Mmp14 (Q10739; MMP14_RAT)	APRELARR	MEROPS:M10.014	Endopeptidase (input)	-18.91	MEROPS score threshold (-22.96)	75	80.66		MMP14
GPGDSPEGPEAEGPE	A6QQ47	13	27	N-terminus	Mmp12 (P34960; MMP12_MOUSE). MMP12 (P39900; MMP12_HUMAN). Mmp12 (Q63341; MMP12_RAT)	GPGSGPGD	MEROPS:M10.009	Endopeptidase (input)	-20.16	MEROPS score threshold (-22.75)	67	88.47		Mmp12
GPGDSPEGPEAEGPE	A6QQ47	13	27	N-terminus	Mmp13 (P23097; MMP13_RAT). Mmp13 (P33435; MMP13_MOUSE). MMP13 (P45452; MMP13_HUMAN)	GPGSGPGD	MEROPS:M10.013	Endopeptidase (input)	-19.14	MEROPS score threshold (-23.33)	70	93.66		Mmp13
GPGDSPEGPEAEGPE	A6QQ47	13	27	N-terminus	MMP14 (P50281; MMP14_HUMAN). Mmp14 (P53690; MMP14_MOUSE). Mmp14 (Q10739; MMP14_RAT)	GPGSGPGD	MEROPS:M10.014	Endopeptidase (input)	-20.41	MEROPS score threshold (-22.96)	75	80.66		MMP14
CRDSQPGILPTEHGTLFG	A5PK27	167	184	C-terminus	MMP14 (P50281; MMP14_HUMAN). Mmp14 (P53690; MMP14_MOUSE). Mmp14 (Q10739; MMP14_RAT)	TLFGTETD	MEROPS:M10.014	Endopeptidase (input)	-22.32	MEROPS score threshold (-22.96)	75	80.66		MMP14
PPGISGALATYAAENS	A6QPB3	1228	1243	N-terminus	Mmp12 (P34960; MMP12_MOUSE). MMP12 (P39900; MMP12_HUMAN). Mmp12 (Q63341; MMP12_RAT)	GPRGPPGI	MEROPS:M10.009	Endopeptidase (input)	-19.54	MEROPS score threshold (-22.75)	67	88.47		Mmp12
PPGISGALATYAAENS	A6QPB3	1228	1243	N-terminus	MMP14 (P50281; MMP14_HUMAN). Mmp14 (P53690; MMP14_MOUSE). Mmp14 (Q10739; MMP14_RAT)	GPRGPPGI	MEROPS:M10.014	Endopeptidase (input)	-22.43	MEROPS score threshold (-22.96)	75	80.66		MMP14
RILSYMSSTGVSIGLPGP	A6QPB3	1133	1150	N-terminus	MMP14 (P50281; MMP14_HUMAN). Mmp14 (P53690; MMP14_MOUSE). Mmp14 (Q10739; MMP14_RAT)	ELSNRILS	MEROPS:M10.014	Endopeptidase (input)	-22.67	MEROPS score threshold (-22.96)	75	80.66		MMP14
RILSYMSSTGVSIGLPGP	A6QPB3	1133	1150	C-terminus	Mmp12 (P34960; MMP12_MOUSE). MMP12 (P39900; MMP12_HUMAN). Mmp12 (Q63341; MMP12_RAT)	LPGPPGPP	MEROPS:M10.009	Endopeptidase (input)	-18.69	MEROPS score threshold (-22.75)	67	88.47		Mmp12
AVFANCAGMLVVVF	A5D9A7	197	210	N-terminus	Mmp12 (P34960; MMP12_MOUSE). MMP12 (P39900; MMP12_HUMAN). Mmp12 (Q63341; MMP12_RAT)	LPSEAVFA	MEROPS:M10.009	Endopeptidase (input)	-20.39	MEROPS score threshold (-22.75)	67	88.47		Mmp12
AVFANCAGMLVVVF	A5D9A7	197	210	N-terminus	Mmp13 (P23097; MMP13_RAT). Mmp13 (P33435; MMP13_MOUSE). MMP13 (P45452; MMP13_HUMAN)	LPSEAVFA	MEROPS:M10.013	Endopeptidase (input)	-21.57	MEROPS score threshold (-23.33)	70	93.66		Mmp13
AVFANCAGMLVVVF	A5D9A7	197	210	N-terminus	MMP14 (P50281; MMP14_HUMAN). Mmp14 (P53690; MMP14_MOUSE). Mmp14 (Q10739; MMP14_RAT)	LPSEAVFA	MEROPS:M10.014	Endopeptidase (input)	-20.88	MEROPS score threshold (-22.96)	75	80.66		MMP14
TYGSGTASSKKLAKNKAA	A6QR44	539	556	C-terminus	MMP14 (P50281; MMP14_HUMAN). Mmp14 (P53690; MMP14_MOUSE). Mmp14 (Q10739; MMP14_RAT)	NKAARATL	MEROPS:M10.014	Endopeptidase (input)	-22.78	MEROPS score threshold (-22.96)	75	80.66		MMP14
RSGESKSSAMSSDGSLA	A6H7H1	1030	1046	N-terminus	Mmp13 (P23097; MMP13_RAT). Mmp13 (P33435; MMP13_MOUSE). MMP13 (P45452; MMP13_HUMAN)	ELKSRSGE	MEROPS:M10.013	Endopeptidase (input)	-22.49	MEROPS score threshold (-23.33)	70	93.66		Mmp13
RSGESKSSAMSSDGSLA	A6H7H1	1030	1046	N-terminus	MMP14 (P50281; MMP14_HUMAN). Mmp14 (P53690; MMP14_MOUSE). Mmp14 (Q10739; MMP14_RAT)	ELKSRSGE	MEROPS:M10.014	Endopeptidase (input)	-21.78	MEROPS score threshold (-22.96)	75	80.66		MMP14
RSGESKSSAMSSDGSLA	A6H7H1	1030	1046	C-terminus	Mmp12 (P34960; MMP12_MOUSE). MMP12 (P39900; MMP12_HUMAN). Mmp12 (Q63341; MMP12_RAT)	GSLAENGV	MEROPS:M10.009	Endopeptidase (input)	-21.56	MEROPS score threshold (-22.75)	67	88.47		Mmp12
RSGESKSSAMSSDGSLA	A6H7H1	1030	1046	C-terminus	Mmp13 (P23097; MMP13_RAT). Mmp13 (P33435; MMP13_MOUSE). MMP13 (P45452; MMP13_HUMAN)	GSLAENGV	MEROPS:M10.013	Endopeptidase (input)	-20.49	MEROPS score threshold (-23.33)	70	93.66		Mmp13
RSGESKSSAMSSDGSLA	A6H7H1	1030	1046	C-terminus	MMP14 (P50281; MMP14_HUMAN). Mmp14 (P53690; MMP14_MOUSE). Mmp14 (Q10739; MMP14_RAT)	GSLAENGV	MEROPS:M10.014	Endopeptidase (input)	-22.66	MEROPS score threshold (-22.96)	75	80.66		MMP14
LSAATTFEPLEPVKDTD	A5PJZ5	81	97	N-terminus	Mmp12 (P34960; MMP12_MOUSE). MMP12 (P39900; MMP12_HUMAN). Mmp12 (Q63341; MMP12_RAT)	RLESLSAA	MEROPS:M10.009	Endopeptidase (input)	-18.85	MEROPS score threshold (-22.75)	67	88.47		Mmp12
LSAATTFEPLEPVKDTD	A5PJZ5	81	97	N-terminus	Mmp13 (P23097; MMP13_RAT). Mmp13 (P33435; MMP13_MOUSE). MMP13 (P45452; MMP13_HUMAN)	RLESLSAA	MEROPS:M10.013	Endopeptidase (input)	-22.44	MEROPS score threshold (-23.33)	70	93.66		Mmp13
LSAATTFEPLEPVKDTD	A5PJZ5	81	97	N-terminus	MMP14 (P50281; MMP14_HUMAN). Mmp14 (P53690; MMP14_MOUSE). Mmp14 (Q10739; MMP14_RAT)	RLESLSAA	MEROPS:M10.014	Endopeptidase (input)	-18.31	MEROPS score threshold (-22.96)	75	80.66		MMP14
DSGSVPAPGPGQ	A6QLA6	860	871	C-terminus	Mmp12 (P34960; MMP12_MOUSE). MMP12 (P39900; MMP12_HUMAN). Mmp12 (Q63341; MMP12_RAT)	GPGQGMPV	MEROPS:M10.009	Endopeptidase (input)	-21.65	MEROPS score threshold (-22.75)	67	88.47		Mmp12
GSKGQPVGMA	A6QPF4	32	41	N-terminus	Mmp12 (P34960; MMP12_MOUSE). MMP12 (P39900; MMP12_HUMAN). Mmp12 (Q63341; MMP12_RAT)	PVAPGSKG	MEROPS:M10.009	Endopeptidase (input)	-20.91	MEROPS score threshold (-22.75)	67	88.47		Mmp12
GSKGQPVGMA	A6QPF4	32	41	N-terminus	MMP14 (P50281; MMP14_HUMAN). Mmp14 (P53690; MMP14_MOUSE). Mmp14 (Q10739; MMP14_RAT)	PVAPGSKG	MEROPS:M10.014	Endopeptidase (input)	-21.35	MEROPS score threshold (-22.96)	75	80.66		MMP14
GFPSPNQSSRA	A5D7F6	1058	1068	N-terminus	Mmp12 (P34960; MMP12_MOUSE). MMP12 (P39900; MMP12_HUMAN). Mmp12 (Q63341; MMP12_RAT)	LAAGGFPS	MEROPS:M10.009	Endopeptidase (input)	-20.01	MEROPS score threshold (-22.75)	67	88.47		Mmp12
GFPSPNQSSRA	A5D7F6	1058	1068	N-terminus	MMP14 (P50281; MMP14_HUMAN). Mmp14 (P53690; MMP14_MOUSE). Mmp14 (Q10739; MMP14_RAT)	LAAGGFPS	MEROPS:M10.014	Endopeptidase (input)	-20.3	MEROPS score threshold (-22.96)	75	80.66		MMP14
GFPSPNQSSRA	A5D7F6	1058	1068	C-terminus	Mmp13 (P23097; MMP13_RAT). Mmp13 (P33435; MMP13_MOUSE). MMP13 (P45452; MMP13_HUMAN)	SSRAFQGT	MEROPS:M10.013	Endopeptidase (input)	-21.59	MEROPS score threshold (-23.33)	70	93.66		Mmp13
GFPSPNQSSRA	A5D7F6	1058	1068	C-terminus	MMP14 (P50281; MMP14_HUMAN). Mmp14 (P53690; MMP14_MOUSE). Mmp14 (Q10739; MMP14_RAT)	SSRAFQGT	MEROPS:M10.014	Endopeptidase (input)	-21.31	MEROPS score threshold (-22.96)	75	80.66		MMP14
HSVFALATHHCASVVS	A7E2Y6	1128	1143	C-terminus	MMP14 (P50281; MMP14_HUMAN). Mmp14 (P53690; MMP14_MOUSE). Mmp14 (Q10739; MMP14_RAT)	SVVSNLLG	MEROPS:M10.014	Endopeptidase (input)	-21.54	MEROPS score threshold (-22.96)	75	80.66		MMP14
LFTVMPLSVLRSMISKV	A5D7V7	359	375	N-terminus	MMP14 (P50281; MMP14_HUMAN). Mmp14 (P53690; MMP14_MOUSE). Mmp14 (Q10739; MMP14_RAT)	RLPFLFTV	MEROPS:M10.014	Endopeptidase (input)	-22.55	MEROPS score threshold (-22.96)	75	80.66		MMP14
SDELADVGGALRGLNLS	A5PJQ2	218	234	N-terminus	MMP14 (P50281; MMP14_HUMAN). Mmp14 (P53690; MMP14_MOUSE). Mmp14 (Q10739; MMP14_RAT)	VGALSDEL	MEROPS:M10.014	Endopeptidase (input)	-22.95	MEROPS score threshold (-22.96)	75	80.66		MMP14
TGNQASRAGQASNPGHRS	A6QLH6	668	685	C-terminus	Mmp13 (P23097; MMP13_RAT). Mmp13 (P33435; MMP13_MOUSE). MMP13 (P45452; MMP13_HUMAN)	GHRSQESD	MEROPS:M10.013	Endopeptidase (input)	-22.42	MEROPS score threshold (-23.33)	70	93.66		Mmp13
RRTHAGKSGAPPSAA	A6QR00	405	419	C-terminus	Mmp12 (P34960; MMP12_MOUSE). MMP12 (P39900; MMP12_HUMAN). Mmp12 (Q63341; MMP12_RAT)	PSAAPPTV	MEROPS:M10.009	Endopeptidase (input)	-22.27	MEROPS score threshold (-22.75)	67	88.47		Mmp12
PTGGGGGGGSGGTR	A7E305	54	67	N-terminus	Mmp12 (P34960; MMP12_MOUSE). MMP12 (P39900; MMP12_HUMAN). Mmp12 (Q63341; MMP12_RAT)	GPNSPTGG	MEROPS:M10.009	Endopeptidase (input)	-20.59	MEROPS score threshold (-22.75)	67	88.47		Mmp12
PTGGGGGGGSGGTR	A7E305	54	67	N-terminus	MMP14 (P50281; MMP14_HUMAN). Mmp14 (P53690; MMP14_MOUSE). Mmp14 (Q10739; MMP14_RAT)	GPNSPTGG	MEROPS:M10.014	Endopeptidase (input)	-22.72	MEROPS score threshold (-22.96)	75	80.66		MMP14
PTGGGGGGGSGGTR	A7E305	54	67	C-terminus	Mmp13 (P23097; MMP13_RAT). Mmp13 (P33435; MMP13_MOUSE). MMP13 (P45452; MMP13_HUMAN)	GGTRMRDG	MEROPS:M10.013	Endopeptidase (input)	-22.31	MEROPS score threshold (-23.33)	70	93.66		Mmp13
PTGGGGGGGSGGTR	A7E305	54	67	C-terminus	MMP14 (P50281; MMP14_HUMAN). Mmp14 (P53690; MMP14_MOUSE). Mmp14 (Q10739; MMP14_RAT)	GGTRMRDG	MEROPS:M10.014	Endopeptidase (input)	-22.18	MEROPS score threshold (-22.96)	75	80.66		MMP14
LNTLKRENSSPRVMQRK	A7E300	820	836	N-terminus	MMP14 (P50281; MMP14_HUMAN). Mmp14 (P53690; MMP14_MOUSE). Mmp14 (Q10739; MMP14_RAT)	SLFHLNTL	MEROPS:M10.014	Endopeptidase (input)	-21.05	MEROPS score threshold (-22.96)	75	80.66		MMP14
RAESPSQGKPGEAGAE	E1BM58	709	724	C-terminus	Mmp12 (P34960; MMP12_MOUSE). MMP12 (P39900; MMP12_HUMAN). Mmp12 (Q63341; MMP12_RAT)	AGAEVSGK	MEROPS:M10.009	Endopeptidase (input)	-18.19	MEROPS score threshold (-22.75)	67	88.47		Mmp12
RAESPSQGKPGEAGAE	E1BM58	709	724	C-terminus	Mmp13 (P23097; MMP13_RAT). Mmp13 (P33435; MMP13_MOUSE). MMP13 (P45452; MMP13_HUMAN)	AGAEVSGK	MEROPS:M10.013	Endopeptidase (input)	-22.64	MEROPS score threshold (-23.33)	70	93.66		Mmp13
RAESPSQGKPGEAGAE	E1BM58	709	724	C-terminus	MMP14 (P50281; MMP14_HUMAN). Mmp14 (P53690; MMP14_MOUSE). Mmp14 (Q10739; MMP14_RAT)	AGAEVSGK	MEROPS:M10.014	Endopeptidase (input)	-21.59	MEROPS score threshold (-22.96)	75	80.66		MMP14
GAEGPSDQSAGAERTFHL	E1BM58	1147	1164	N-terminus	Mmp12 (P34960; MMP12_MOUSE). MMP12 (P39900; MMP12_HUMAN). Mmp12 (Q63341; MMP12_RAT)	RAGAGAEG	MEROPS:M10.009	Endopeptidase (input)	-18.62	MEROPS score threshold (-22.75)	67	88.47		Mmp12
GAEGPSDQSAGAERTFHL	E1BM58	1147	1164	N-terminus	MMP14 (P50281; MMP14_HUMAN). Mmp14 (P53690; MMP14_MOUSE). Mmp14 (Q10739; MMP14_RAT)	RAGAGAEG	MEROPS:M10.014	Endopeptidase (input)	-19.93	MEROPS score threshold (-22.96)	75	80.66		MMP14
SYAGGTGSAGGAATVAFA	A7YY54	199	216	C-terminus	Mmp12 (P34960; MMP12_MOUSE). MMP12 (P39900; MMP12_HUMAN). Mmp12 (Q63341; MMP12_RAT)	VAFAAEPV	MEROPS:M10.009	Endopeptidase (input)	-19.98	MEROPS score threshold (-22.75)	67	88.47		Mmp12
VTQSHWPSEPSEAV	O18738	26	39	N-terminus	MMP14 (P50281; MMP14_HUMAN). Mmp14 (P53690; MMP14_MOUSE). Mmp14 (Q10739; MMP14_RAT)	LSVAVTQS	MEROPS:M10.014	Endopeptidase (input)	-20.99	MEROPS score threshold (-22.96)	75	80.66		MMP14
LVRGDAAGSAG	A7MB34	193	203	N-terminus	Mmp12 (P34960; MMP12_MOUSE). MMP12 (P39900; MMP12_HUMAN). Mmp12 (Q63341; MMP12_RAT)	PAAGLVRG	MEROPS:M10.009	Endopeptidase (input)	-15.73	MEROPS score threshold (-22.75)	67	88.47		Mmp12
LVRGDAAGSAG	A7MB34	193	203	N-terminus	Mmp13 (P23097; MMP13_RAT). Mmp13 (P33435; MMP13_MOUSE). MMP13 (P45452; MMP13_HUMAN)	PAAGLVRG	MEROPS:M10.013	Endopeptidase (input)	-19.82	MEROPS score threshold (-23.33)	70	93.66		Mmp13
LVRGDAAGSAG	A7MB34	193	203	N-terminus	MMP14 (P50281; MMP14_HUMAN). Mmp14 (P53690; MMP14_MOUSE). Mmp14 (Q10739; MMP14_RAT)	PAAGLVRG	MEROPS:M10.014	Endopeptidase (input)	-17.65	MEROPS score threshold (-22.96)	75	80.66		MMP14
LVRGDAAGSAG	A7MB34	193	203	N-terminus	Mmp17 (Q9R0S3; MMP17_MOUSE). MMP17 (Q9ULZ9; MMP17_HUMAN)	PAAGLVRG	MEROPS:M10.017	Endopeptidase (input)	-17	99th percentile (-17.12)	0	99.95		Mmp17
LVRGDAAGSAG	A7MB34	193	203	C-terminus	Mmp12 (P34960; MMP12_MOUSE). MMP12 (P39900; MMP12_HUMAN). Mmp12 (Q63341; MMP12_RAT)	GSAGGPAV	MEROPS:M10.009	Endopeptidase (input)	-18.48	MEROPS score threshold (-22.75)	67	88.47		Mmp12
LVRGDAAGSAG	A7MB34	193	203	C-terminus	Mmp13 (P23097; MMP13_RAT). Mmp13 (P33435; MMP13_MOUSE). MMP13 (P45452; MMP13_HUMAN)	GSAGGPAV	MEROPS:M10.013	Endopeptidase (input)	-20.57	MEROPS score threshold (-23.33)	70	93.66		Mmp13
LVRGDAAGSAG	A7MB34	193	203	C-terminus	MMP14 (P50281; MMP14_HUMAN). Mmp14 (P53690; MMP14_MOUSE). Mmp14 (Q10739; MMP14_RAT)	GSAGGPAV	MEROPS:M10.014	Endopeptidase (input)	-19.8	MEROPS score threshold (-22.96)	75	80.66		MMP14
SGAPPASGHSHRP	A7YWM1	88	100	N-terminus	Mmp12 (P34960; MMP12_MOUSE). MMP12 (P39900; MMP12_HUMAN). Mmp12 (Q63341; MMP12_RAT)	GALGSGAP	MEROPS:M10.009	Endopeptidase (input)	-15.49	MEROPS score threshold (-22.75)	67	88.47		Mmp12
SGAPPASGHSHRP	A7YWM1	88	100	N-terminus	Mmp13 (P23097; MMP13_RAT). Mmp13 (P33435; MMP13_MOUSE). MMP13 (P45452; MMP13_HUMAN)	GALGSGAP	MEROPS:M10.013	Endopeptidase (input)	-18.74	MEROPS score threshold (-23.33)	70	93.66		Mmp13
SGAPPASGHSHRP	A7YWM1	88	100	N-terminus	MMP14 (P50281; MMP14_HUMAN). Mmp14 (P53690; MMP14_MOUSE). Mmp14 (Q10739; MMP14_RAT)	GALGSGAP	MEROPS:M10.014	Endopeptidase (input)	-20.08	MEROPS score threshold (-22.96)	75	80.66		MMP14
SGAPPASGHSHRP	A7YWM1	88	100	N-terminus	MMP20 (O60882; MMP20_HUMAN). Mmp20 (P57748; MMP20_MOUSE)	GALGSGAP	MEROPS:M10.019	Endopeptidase (input)	-17.29	99th percentile (-17.5)	33	99.92		MMP20
LMAAMGNTDH	A7MBF6	329	338	N-terminus	MMP14 (P50281; MMP14_HUMAN). Mmp14 (P53690; MMP14_MOUSE). Mmp14 (Q10739; MMP14_RAT)	VIHSLMAA	MEROPS:M10.014	Endopeptidase (input)	-22.29	MEROPS score threshold (-22.96)	75	80.66		MMP14
EALQGFARSVAAARGPAA	A7YY73	112	129	C-terminus	Mmp12 (P34960; MMP12_MOUSE). MMP12 (P39900; MMP12_HUMAN). Mmp12 (Q63341; MMP12_RAT)	GPAALVAP	MEROPS:M10.009	Endopeptidase (input)	-12.78	MEROPS score threshold (-22.75)	67	88.47		Mmp12
EALQGFARSVAAARGPAA	A7YY73	112	129	C-terminus	Mmp13 (P23097; MMP13_RAT). Mmp13 (P33435; MMP13_MOUSE). MMP13 (P45452; MMP13_HUMAN)	GPAALVAP	MEROPS:M10.013	Endopeptidase (input)	-13.85	MEROPS score threshold (-23.33)	70	93.66		Mmp13
EALQGFARSVAAARGPAA	A7YY73	112	129	C-terminus	MMP14 (P50281; MMP14_HUMAN). Mmp14 (P53690; MMP14_MOUSE). Mmp14 (Q10739; MMP14_RAT)	GPAALVAP	MEROPS:M10.014	Endopeptidase (input)	-16	MEROPS score threshold (-22.96)	75	80.66		MMP14
EALQGFARSVAAARGPAA	A7YY73	112	129	C-terminus	Mmp17 (Q9R0S3; MMP17_MOUSE). MMP17 (Q9ULZ9; MMP17_HUMAN)	GPAALVAP	MEROPS:M10.017	Endopeptidase (input)	-16.9	99th percentile (-17.12)	0	99.95		Mmp17
EALQGFARSVAAARGPAA	A7YY73	112	129	C-terminus	MMP20 (O60882; MMP20_HUMAN). Mmp20 (P57748; MMP20_MOUSE)	GPAALVAP	MEROPS:M10.019	Endopeptidase (input)	-16.12	99th percentile (-17.5)	33	99.92		MMP20
KGNGMVIEMKFSNMCNKSE	G7H7V7	302	320	N-terminus	Mmp12 (P34960; MMP12_MOUSE). MMP12 (P39900; MMP12_HUMAN). Mmp12 (Q63341; MMP12_RAT)	KVSEKGNG	MEROPS:M10.009	Endopeptidase (input)	-22.2	MEROPS score threshold (-22.75)	67	88.47		Mmp12
KGNGMVIEMKFSNMCNKSE	G7H7V7	302	320	C-terminus	MMP14 (P50281; MMP14_HUMAN). Mmp14 (P53690; MMP14_MOUSE). Mmp14 (Q10739; MMP14_RAT)	NKSELMLQ	MEROPS:M10.014	Endopeptidase (input)	-22.58	MEROPS score threshold (-22.96)	75	80.66		MMP14
LTTSPQGHFVGSDWQ	E1BD59	617	631	N-terminus	Mmp12 (P34960; MMP12_MOUSE). MMP12 (P39900; MMP12_HUMAN). Mmp12 (Q63341; MMP12_RAT)	ALVFLTTS	MEROPS:M10.009	Endopeptidase (input)	-22.69	MEROPS score threshold (-22.75)	67	88.47		Mmp12
LTTSPQGHFVGSDWQ	E1BD59	617	631	N-terminus	MMP14 (P50281; MMP14_HUMAN). Mmp14 (P53690; MMP14_MOUSE). Mmp14 (Q10739; MMP14_RAT)	ALVFLTTS	MEROPS:M10.014	Endopeptidase (input)	-22.01	MEROPS score threshold (-22.96)	75	80.66		MMP14
EFSVDIGRLAQE	A7Z050	1374	1385	C-terminus	Mmp12 (P34960; MMP12_MOUSE). MMP12 (P39900; MMP12_HUMAN). Mmp12 (Q63341; MMP12_RAT)	LAQEASAI	MEROPS:M10.009	Endopeptidase (input)	-19.26	MEROPS score threshold (-22.75)	67	88.47		Mmp12
EFSVDIGRLAQE	A7Z050	1374	1385	C-terminus	Mmp13 (P23097; MMP13_RAT). Mmp13 (P33435; MMP13_MOUSE). MMP13 (P45452; MMP13_HUMAN)	LAQEASAI	MEROPS:M10.013	Endopeptidase (input)	-21.26	MEROPS score threshold (-23.33)	70	93.66		Mmp13
EFSVDIGRLAQE	A7Z050	1374	1385	C-terminus	MMP14 (P50281; MMP14_HUMAN). Mmp14 (P53690; MMP14_MOUSE). Mmp14 (Q10739; MMP14_RAT)	LAQEASAI	MEROPS:M10.014	Endopeptidase (input)	-21.84	MEROPS score threshold (-22.96)	75	80.66		MMP14
LPASDLLPGGPSSPLANS	A7YWC8	130	147	N-terminus	Mmp12 (P34960; MMP12_MOUSE). MMP12 (P39900; MMP12_HUMAN). Mmp12 (Q63341; MMP12_RAT)	RLGPLPAS	MEROPS:M10.009	Endopeptidase (input)	-19.59	MEROPS score threshold (-22.75)	67	88.47		Mmp12
LPASDLLPGGPSSPLANS	A7YWC8	130	147	N-terminus	Mmp13 (P23097; MMP13_RAT). Mmp13 (P33435; MMP13_MOUSE). MMP13 (P45452; MMP13_HUMAN)	RLGPLPAS	MEROPS:M10.013	Endopeptidase (input)	-22.6	MEROPS score threshold (-23.33)	70	93.66		Mmp13
LPASDLLPGGPSSPLANS	A7YWC8	130	147	N-terminus	MMP14 (P50281; MMP14_HUMAN). Mmp14 (P53690; MMP14_MOUSE). Mmp14 (Q10739; MMP14_RAT)	RLGPLPAS	MEROPS:M10.014	Endopeptidase (input)	-19.12	MEROPS score threshold (-22.96)	75	80.66		MMP14
LPASDLLPGGPSSPLANS	A7YWC8	130	147	C-terminus	MMP14 (P50281; MMP14_HUMAN). Mmp14 (P53690; MMP14_MOUSE). Mmp14 (Q10739; MMP14_RAT)	LANSTGEE	MEROPS:M10.014	Endopeptidase (input)	-22.18	MEROPS score threshold (-22.96)	75	80.66		MMP14
CPTLVPPTDSLGPG	A7Z026	533	546	C-terminus	Mmp12 (P34960; MMP12_MOUSE). MMP12 (P39900; MMP12_HUMAN). Mmp12 (Q63341; MMP12_RAT)	LGPGDRSP	MEROPS:M10.009	Endopeptidase (input)	-21.71	MEROPS score threshold (-22.75)	67	88.47		Mmp12
CPTLVPPTDSLGPG	A7Z026	533	546	C-terminus	Mmp13 (P23097; MMP13_RAT). Mmp13 (P33435; MMP13_MOUSE). MMP13 (P45452; MMP13_HUMAN)	LGPGDRSP	MEROPS:M10.013	Endopeptidase (input)	-21.16	MEROPS score threshold (-23.33)	70	93.66		Mmp13
CPTLVPPTDSLGPG	A7Z026	533	546	C-terminus	MMP14 (P50281; MMP14_HUMAN). Mmp14 (P53690; MMP14_MOUSE). Mmp14 (Q10739; MMP14_RAT)	LGPGDRSP	MEROPS:M10.014	Endopeptidase (input)	-20.52	MEROPS score threshold (-22.96)	75	80.66		MMP14
LPFLPGTSPSADGPDSFS	F1MUS9	388	405	N-terminus	MMP14 (P50281; MMP14_HUMAN). Mmp14 (P53690; MMP14_MOUSE). Mmp14 (Q10739; MMP14_RAT)	LKSPLPFL	MEROPS:M10.014	Endopeptidase (input)	-21.72	MEROPS score threshold (-22.96)	75	80.66		MMP14
KSIGPLTFVFTGT	A8E657	212	224	N-terminus	Mmp12 (P34960; MMP12_MOUSE). MMP12 (P39900; MMP12_HUMAN). Mmp12 (Q63341; MMP12_RAT)	GLMPKSIG	MEROPS:M10.009	Endopeptidase (input)	-21.56	MEROPS score threshold (-22.75)	67	88.47		Mmp12
ASLRAAKQADRRIKL	A7YW45	374	388	N-terminus	MMP14 (P50281; MMP14_HUMAN). Mmp14 (P53690; MMP14_MOUSE). Mmp14 (Q10739; MMP14_RAT)	PLVNASLR	MEROPS:M10.014	Endopeptidase (input)	-21.33	MEROPS score threshold (-22.96)	75	80.66		MMP14
PHLLTLVSSSIPVP	C1JZ66	198	211	C-terminus	MMP14 (P50281; MMP14_HUMAN). Mmp14 (P53690; MMP14_MOUSE). Mmp14 (Q10739; MMP14_RAT)	IPVPFLRN	MEROPS:M10.014	Endopeptidase (input)	-22.72	MEROPS score threshold (-22.96)	75	80.66		MMP14
LISKGKKTGAKGKR	A7YY35	804	817	C-terminus	MMP14 (P50281; MMP14_HUMAN). Mmp14 (P53690; MMP14_MOUSE). Mmp14 (Q10739; MMP14_RAT)	KGKRTRKE	MEROPS:M10.014	Endopeptidase (input)	-22.47	MEROPS score threshold (-22.96)	75	80.66		MMP14
FSELPEVLDQIQN	F1MCA7	196	208	C-terminus	Mmp13 (P23097; MMP13_RAT). Mmp13 (P33435; MMP13_MOUSE). MMP13 (P45452; MMP13_HUMAN)	QIQNLREL	MEROPS:M10.013	Endopeptidase (input)	-21.42	MEROPS score threshold (-23.33)	70	93.66		Mmp13
FSELPEVLDQIQN	F1MCA7	196	208	C-terminus	MMP14 (P50281; MMP14_HUMAN). Mmp14 (P53690; MMP14_MOUSE). Mmp14 (Q10739; MMP14_RAT)	QIQNLREL	MEROPS:M10.014	Endopeptidase (input)	-18.7	MEROPS score threshold (-22.96)	75	80.66		MMP14
AAEGDPEQVQGGAEGSS	F1MLB4	329	345	N-terminus	Mmp13 (P23097; MMP13_RAT). Mmp13 (P33435; MMP13_MOUSE). MMP13 (P45452; MMP13_HUMAN)	GHPRAAEG	MEROPS:M10.013	Endopeptidase (input)	-21.08	MEROPS score threshold (-23.33)	70	93.66		Mmp13
PLYITKVMSKSAA	O02675	249	261	C-terminus	Mmp12 (P34960; MMP12_MOUSE). MMP12 (P39900; MMP12_HUMAN). Mmp12 (Q63341; MMP12_RAT)	KSAAEVIA	MEROPS:M10.009	Endopeptidase (input)	-21.51	MEROPS score threshold (-22.75)	67	88.47		Mmp12
QWLPRLHALVV	E1BNQ4	122	132	C-terminus	Mmp12 (P34960; MMP12_MOUSE). MMP12 (P39900; MMP12_HUMAN). Mmp12 (Q63341; MMP12_RAT)	ALVVGPGL	MEROPS:M10.009	Endopeptidase (input)	-22.65	MEROPS score threshold (-22.75)	67	88.47		Mmp12
PDPSSPGVSAAVPAPP	E1BP74	1685	1700	C-terminus	MMP14 (P50281; MMP14_HUMAN). Mmp14 (P53690; MMP14_MOUSE). Mmp14 (Q10739; MMP14_RAT)	PAPPSPSS	MEROPS:M10.014	Endopeptidase (input)	-22.35	MEROPS score threshold (-22.96)	75	80.66		MMP14
RSEPPSATPSPALSVESL	E1BBG2	487	504	N-terminus	MMP14 (P50281; MMP14_HUMAN). Mmp14 (P53690; MMP14_MOUSE). Mmp14 (Q10739; MMP14_RAT)	SRLSRSEP	MEROPS:M10.014	Endopeptidase (input)	-22.52	MEROPS score threshold (-22.96)	75	80.66		MMP14
ETGDDLLVSEVTQSNKE	F1MRW8	439	455	N-terminus	Mmp13 (P23097; MMP13_RAT). Mmp13 (P33435; MMP13_MOUSE). MMP13 (P45452; MMP13_HUMAN)	SLAPETGD	MEROPS:M10.013	Endopeptidase (input)	-22.2	MEROPS score threshold (-23.33)	70	93.66		Mmp13
DAGGQSQEPEVLGRT	A8E4N3	69	83	C-terminus	MMP14 (P50281; MMP14_HUMAN). Mmp14 (P53690; MMP14_MOUSE). Mmp14 (Q10739; MMP14_RAT)	LGRTGNLP	MEROPS:M10.014	Endopeptidase (input)	-22.69	MEROPS score threshold (-22.96)	75	80.66		MMP14
SGPSSGPQMSSGPGGAPLD	A7Z019	137	155	N-terminus	Mmp12 (P34960; MMP12_MOUSE). MMP12 (P39900; MMP12_HUMAN). Mmp12 (Q63341; MMP12_RAT)	PVPASGPS	MEROPS:M10.009	Endopeptidase (input)	-21.8	MEROPS score threshold (-22.75)	67	88.47		Mmp12
SGPSSGPQMSSGPGGAPLD	A7Z019	137	155	C-terminus	Mmp12 (P34960; MMP12_MOUSE). MMP12 (P39900; MMP12_HUMAN). Mmp12 (Q63341; MMP12_RAT)	APLDGADP	MEROPS:M10.009	Endopeptidase (input)	-21.89	MEROPS score threshold (-22.75)	67	88.47		Mmp12
SGPSSGPQMSSGPGGAPLD	A7Z019	137	155	C-terminus	Mmp13 (P23097; MMP13_RAT). Mmp13 (P33435; MMP13_MOUSE). MMP13 (P45452; MMP13_HUMAN)	APLDGADP	MEROPS:M10.013	Endopeptidase (input)	-21.22	MEROPS score threshold (-23.33)	70	93.66		Mmp13
SGPSSGPQMSSGPGGAPLD	A7Z019	137	155	C-terminus	MMP14 (P50281; MMP14_HUMAN). Mmp14 (P53690; MMP14_MOUSE). Mmp14 (Q10739; MMP14_RAT)	APLDGADP	MEROPS:M10.014	Endopeptidase (input)	-21.43	MEROPS score threshold (-22.96)	75	80.66		MMP14
GPGPSPGAMLGPSPGP	A7Z019	19	34	N-terminus	Mmp12 (P34960; MMP12_MOUSE). MMP12 (P39900; MMP12_HUMAN). Mmp12 (Q63341; MMP12_RAT)	GPSPGPGP	MEROPS:M10.009	Endopeptidase (input)	-19.78	MEROPS score threshold (-22.75)	67	88.47		Mmp12
GPGPSPGAMLGPSPGP	A7Z019	19	34	N-terminus	Mmp13 (P23097; MMP13_RAT). Mmp13 (P33435; MMP13_MOUSE). MMP13 (P45452; MMP13_HUMAN)	GPSPGPGP	MEROPS:M10.013	Endopeptidase (input)	-17.59	MEROPS score threshold (-23.33)	70	93.66		Mmp13
GPGPSPGAMLGPSPGP	A7Z019	19	34	N-terminus	MMP14 (P50281; MMP14_HUMAN). Mmp14 (P53690; MMP14_MOUSE). Mmp14 (Q10739; MMP14_RAT)	GPSPGPGP	MEROPS:M10.014	Endopeptidase (input)	-19.81	MEROPS score threshold (-22.96)	75	80.66		MMP14
GPGPSPGAMLGPSPGP	A7Z019	19	34	C-terminus	Mmp12 (P34960; MMP12_MOUSE). MMP12 (P39900; MMP12_HUMAN). Mmp12 (Q63341; MMP12_RAT)	SPGPSPGS	MEROPS:M10.009	Endopeptidase (input)	-21.43	MEROPS score threshold (-22.75)	67	88.47		Mmp12
GPGPSPGAMLGPSPGP	A7Z019	19	34	C-terminus	Mmp13 (P23097; MMP13_RAT). Mmp13 (P33435; MMP13_MOUSE). MMP13 (P45452; MMP13_HUMAN)	SPGPSPGS	MEROPS:M10.013	Endopeptidase (input)	-21.93	MEROPS score threshold (-23.33)	70	93.66		Mmp13
GPGPSPGAMLGPSPGP	A7Z019	19	34	C-terminus	MMP14 (P50281; MMP14_HUMAN). Mmp14 (P53690; MMP14_MOUSE). Mmp14 (Q10739; MMP14_RAT)	SPGPSPGS	MEROPS:M10.014	Endopeptidase (input)	-20.1	MEROPS score threshold (-22.96)	75	80.66		MMP14
GRPSPAPPAVPPAASP	A7Z019	301	316	C-terminus	Mmp12 (P34960; MMP12_MOUSE). MMP12 (P39900; MMP12_HUMAN). Mmp12 (Q63341; MMP12_RAT)	AASPVMPP	MEROPS:M10.009	Endopeptidase (input)	-22.29	MEROPS score threshold (-22.75)	67	88.47		Mmp12
GRPSPAPPAVPPAASP	A7Z019	301	316	C-terminus	Mmp13 (P23097; MMP13_RAT). Mmp13 (P33435; MMP13_MOUSE). MMP13 (P45452; MMP13_HUMAN)	AASPVMPP	MEROPS:M10.013	Endopeptidase (input)	-22.95	MEROPS score threshold (-23.33)	70	93.66		Mmp13
GTAAPLRPGMPPTMMDPF	E1BJD1	98	115	N-terminus	Mmp12 (P34960; MMP12_MOUSE). MMP12 (P39900; MMP12_HUMAN). Mmp12 (Q63341; MMP12_RAT)	GSPFGTAA	MEROPS:M10.009	Endopeptidase (input)	-20.87	MEROPS score threshold (-22.75)	67	88.47		Mmp12
ALLPEPLKPQAALPVPPS	O18964	1220	1237	N-terminus	Mmp12 (P34960; MMP12_MOUSE). MMP12 (P39900; MMP12_HUMAN). Mmp12 (Q63341; MMP12_RAT)	LKGPALLP	MEROPS:M10.009	Endopeptidase (input)	-22.16	MEROPS score threshold (-22.75)	67	88.47		Mmp12
ALLPEPLKPQAALPVPPS	O18964	1220	1237	C-terminus	Mmp12 (P34960; MMP12_MOUSE). MMP12 (P39900; MMP12_HUMAN). Mmp12 (Q63341; MMP12_RAT)	VPPSLAPP	MEROPS:M10.009	Endopeptidase (input)	-18.52	MEROPS score threshold (-22.75)	67	88.47		Mmp12
ALLPEPLKPQAALPVPPS	O18964	1220	1237	C-terminus	Mmp13 (P23097; MMP13_RAT). Mmp13 (P33435; MMP13_MOUSE). MMP13 (P45452; MMP13_HUMAN)	VPPSLAPP	MEROPS:M10.013	Endopeptidase (input)	-19.03	MEROPS score threshold (-23.33)	70	93.66		Mmp13
ALLPEPLKPQAALPVPPS	O18964	1220	1237	C-terminus	MMP14 (P50281; MMP14_HUMAN). Mmp14 (P53690; MMP14_MOUSE). Mmp14 (Q10739; MMP14_RAT)	VPPSLAPP	MEROPS:M10.014	Endopeptidase (input)	-19.84	MEROPS score threshold (-22.96)	75	80.66		MMP14
NGPGSRSKVPSGTNNHSL	A8E653	79	96	C-terminus	MMP14 (P50281; MMP14_HUMAN). Mmp14 (P53690; MMP14_MOUSE). Mmp14 (Q10739; MMP14_RAT)	NHSLLQQE	MEROPS:M10.014	Endopeptidase (input)	-22.61	MEROPS score threshold (-22.96)	75	80.66		MMP14
AAPASTHTTAT	F1MCY2	248	258	N-terminus	Mmp12 (P34960; MMP12_MOUSE). MMP12 (P39900; MMP12_HUMAN). Mmp12 (Q63341; MMP12_RAT)	RTLPAAPA	MEROPS:M10.009	Endopeptidase (input)	-21.1	MEROPS score threshold (-22.75)	67	88.47		Mmp12
AAPASTHTTAT	F1MCY2	248	258	C-terminus	Mmp12 (P34960; MMP12_MOUSE). MMP12 (P39900; MMP12_HUMAN). Mmp12 (Q63341; MMP12_RAT)	TTATLSLT	MEROPS:M10.009	Endopeptidase (input)	-22.62	MEROPS score threshold (-22.75)	67	88.47		Mmp12
AAPASTHTTAT	F1MCY2	248	258	C-terminus	MMP14 (P50281; MMP14_HUMAN). Mmp14 (P53690; MMP14_MOUSE). Mmp14 (Q10739; MMP14_RAT)	TTATLSLT	MEROPS:M10.014	Endopeptidase (input)	-21.49	MEROPS score threshold (-22.96)	75	80.66		MMP14
DSEQGGEDPGKLSHATLKN	F1MCY2	96	114	N-terminus	MMP14 (P50281; MMP14_HUMAN). Mmp14 (P53690; MMP14_MOUSE). Mmp14 (Q10739; MMP14_RAT)	LLLEDSEQ	MEROPS:M10.014	Endopeptidase (input)	-20.66	MEROPS score threshold (-22.96)	75	80.66		MMP14
DSEQGGEDPGKLSHATLKN	F1MCY2	96	114	C-terminus	MMP14 (P50281; MMP14_HUMAN). Mmp14 (P53690; MMP14_MOUSE). Mmp14 (Q10739; MMP14_RAT)	TLKNGHTT	MEROPS:M10.014	Endopeptidase (input)	-22.67	MEROPS score threshold (-22.96)	75	80.66		MMP14
SQAFGTVHVYPDKMM	A7YY53	306	320	N-terminus	Mmp13 (P23097; MMP13_RAT). Mmp13 (P33435; MMP13_MOUSE). MMP13 (P45452; MMP13_HUMAN)	TAPDSQAF	MEROPS:M10.013	Endopeptidase (input)	-22.47	MEROPS score threshold (-23.33)	70	93.66		Mmp13
SQAFGTVHVYPDKMM	A7YY53	306	320	N-terminus	MMP14 (P50281; MMP14_HUMAN). Mmp14 (P53690; MMP14_MOUSE). Mmp14 (Q10739; MMP14_RAT)	TAPDSQAF	MEROPS:M10.014	Endopeptidase (input)	-22.43	MEROPS score threshold (-22.96)	75	80.66		MMP14
SQAFGTVHVYPDKMM	A7YY53	306	320	C-terminus	MMP14 (P50281; MMP14_HUMAN). Mmp14 (P53690; MMP14_MOUSE). Mmp14 (Q10739; MMP14_RAT)	DKMMLEGR	MEROPS:M10.014	Endopeptidase (input)	-22.66	MEROPS score threshold (-22.96)	75	80.66		MMP14
VDVVKTRYMNSPPGQYHS	O77792	237	254	N-terminus	Mmp13 (P23097; MMP13_RAT). Mmp13 (P33435; MMP13_MOUSE). MMP13 (P45452; MMP13_HUMAN)	VASPVDVV	MEROPS:M10.013	Endopeptidase (input)	-22.7	MEROPS score threshold (-23.33)	70	93.66		Mmp13
GCHLPHTHSLPNRRVLTL	P05008	23	40	C-terminus	MMP14 (P50281; MMP14_HUMAN). Mmp14 (P53690; MMP14_MOUSE). Mmp14 (Q10739; MMP14_RAT)	VLTLLRQL	MEROPS:M10.014	Endopeptidase (input)	-21.13	MEROPS score threshold (-22.96)	75	80.66		MMP14
AAEKKDSGPYKM	P01190	210	221	N-terminus	Mmp12 (P34960; MMP12_MOUSE). MMP12 (P39900; MMP12_HUMAN). Mmp12 (Q63341; MMP12_RAT)	AEAEAAEK	MEROPS:M10.009	Endopeptidase (input)	-21.18	MEROPS score threshold (-22.75)	67	88.47		Mmp12
VHLSSGGQYK	P06504	86	95	C-terminus	Mmp12 (P34960; MMP12_MOUSE). MMP12 (P39900; MMP12_HUMAN). Mmp12 (Q63341; MMP12_RAT)	GQYKLQIF	MEROPS:M10.009	Endopeptidase (input)	-22.46	MEROPS score threshold (-22.75)	67	88.47		Mmp12
FCLLGPEGTPASWSLMD	O77512	206	222	C-terminus	MMP14 (P50281; MMP14_HUMAN). Mmp14 (P53690; MMP14_MOUSE). Mmp14 (Q10739; MMP14_RAT)	SLMDQTGE	MEROPS:M10.014	Endopeptidase (input)	-22.83	MEROPS score threshold (-22.96)	75	80.66		MMP14
FTRIHNGTADIMISFGTKE	O77656	153	171	N-terminus	Mmp13 (P23097; MMP13_RAT). Mmp13 (P33435; MMP13_MOUSE). MMP13 (P45452; MMP13_HUMAN)	TPLNFTRI	MEROPS:M10.013	Endopeptidase (input)	-22.82	MEROPS score threshold (-23.33)	70	93.66		Mmp13
FTRIHNGTADIMISFGTKE	O77656	153	171	N-terminus	MMP14 (P50281; MMP14_HUMAN). Mmp14 (P53690; MMP14_MOUSE). Mmp14 (Q10739; MMP14_RAT)	TPLNFTRI	MEROPS:M10.014	Endopeptidase (input)	-22.49	MEROPS score threshold (-22.96)	75	80.66		MMP14
GGSRGGGGYGGS	P09867	229	240	N-terminus	Mmp12 (P34960; MMP12_MOUSE). MMP12 (P39900; MMP12_HUMAN). Mmp12 (Q63341; MMP12_RAT)	RGGFGGSR	MEROPS:M10.009	Endopeptidase (input)	-21.92	MEROPS score threshold (-22.75)	67	88.47		Mmp12
NSGGGGAAGGGPGERKRT	O46606	129	146	N-terminus	Mmp12 (P34960; MMP12_MOUSE). MMP12 (P39900; MMP12_HUMAN). Mmp12 (Q63341; MMP12_RAT)	LVPSNSGG	MEROPS:M10.009	Endopeptidase (input)	-22.24	MEROPS score threshold (-22.75)	67	88.47		Mmp12
NSGGGGAAGGGPGERKRT	O46606	129	146	N-terminus	Mmp13 (P23097; MMP13_RAT). Mmp13 (P33435; MMP13_MOUSE). MMP13 (P45452; MMP13_HUMAN)	LVPSNSGG	MEROPS:M10.013	Endopeptidase (input)	-21.95	MEROPS score threshold (-23.33)	70	93.66		Mmp13
NSGGGGAAGGGPGERKRT	O46606	129	146	N-terminus	MMP14 (P50281; MMP14_HUMAN). Mmp14 (P53690; MMP14_MOUSE). Mmp14 (Q10739; MMP14_RAT)	LVPSNSGG	MEROPS:M10.014	Endopeptidase (input)	-20.64	MEROPS score threshold (-22.96)	75	80.66		MMP14
DPPSGDFLTEGGGVRG	P02672	24	39	C-terminus	Mmp12 (P34960; MMP12_MOUSE). MMP12 (P39900; MMP12_HUMAN). Mmp12 (Q63341; MMP12_RAT)	GVRGPRLV	MEROPS:M10.009	Endopeptidase (input)	-20.96	MEROPS score threshold (-22.75)	67	88.47		Mmp12
DPPSGDFLTEGGGVRG	P02672	24	39	C-terminus	MMP14 (P50281; MMP14_HUMAN). Mmp14 (P53690; MMP14_MOUSE). Mmp14 (Q10739; MMP14_RAT)	GVRGPRLV	MEROPS:M10.014	Endopeptidase (input)	-22.42	MEROPS score threshold (-22.96)	75	80.66		MMP14
DPPSGDFLTEGGGVRGPRL	P02672	24	42	C-terminus	Mmp13 (P23097; MMP13_RAT). Mmp13 (P33435; MMP13_MOUSE). MMP13 (P45452; MMP13_HUMAN)	GPRLVERQ	MEROPS:M10.013	Endopeptidase (input)	-23.24	MEROPS score threshold (-23.33)	70	93.66		Mmp13
DPPSGDFLTEGGGVRGPRL	P02672	24	42	C-terminus	MMP14 (P50281; MMP14_HUMAN). Mmp14 (P53690; MMP14_MOUSE). Mmp14 (Q10739; MMP14_RAT)	GPRLVERQ	MEROPS:M10.014	Endopeptidase (input)	-21.75	MEROPS score threshold (-22.96)	75	80.66		MMP14
LTSAPVPSTTTRSLTACP	P08037	118	135	N-terminus	Mmp12 (P34960; MMP12_MOUSE). MMP12 (P39900; MMP12_HUMAN). Mmp12 (Q63341; MMP12_RAT)	PGSNLTSA	MEROPS:M10.009	Endopeptidase (input)	-20.75	MEROPS score threshold (-22.75)	67	88.47		Mmp12
LTSAPVPSTTTRSLTACP	P08037	118	135	N-terminus	Mmp13 (P23097; MMP13_RAT). Mmp13 (P33435; MMP13_MOUSE). MMP13 (P45452; MMP13_HUMAN)	PGSNLTSA	MEROPS:M10.013	Endopeptidase (input)	-22.49	MEROPS score threshold (-23.33)	70	93.66		Mmp13
LTSAPVPSTTTRSLTACP	P08037	118	135	N-terminus	MMP14 (P50281; MMP14_HUMAN). Mmp14 (P53690; MMP14_MOUSE). Mmp14 (Q10739; MMP14_RAT)	PGSNLTSA	MEROPS:M10.014	Endopeptidase (input)	-20.06	MEROPS score threshold (-22.96)	75	80.66		MMP14
GVPGVGVPGVGVPGVG	P04985	338	353	N-terminus	Mmp12 (P34960; MMP12_MOUSE). MMP12 (P39900; MMP12_HUMAN). Mmp12 (Q63341; MMP12_RAT)	LPGVGVPG	MEROPS:M10.009	Endopeptidase (input)	-19.81	MEROPS score threshold (-22.75)	67	88.47		Mmp12
GVPGVGVPGVGVPGVG	P04985	338	353	C-terminus	Mmp12 (P34960; MMP12_MOUSE). MMP12 (P39900; MMP12_HUMAN). Mmp12 (Q63341; MMP12_RAT)	PGVGVPGV	MEROPS:M10.009	Endopeptidase (input)	-19.99	MEROPS score threshold (-22.75)	67	88.47		Mmp12
GVPGVGVPGVGVPGVG	P04985	338	353	C-terminus	Mmp13 (P23097; MMP13_RAT). Mmp13 (P33435; MMP13_MOUSE). MMP13 (P45452; MMP13_HUMAN)	PGVGVPGV	MEROPS:M10.013	Endopeptidase (input)	-20.92	MEROPS score threshold (-23.33)	70	93.66		Mmp13
GVPGVGVPGVGVPGVG	P04985	338	353	C-terminus	MMP14 (P50281; MMP14_HUMAN). Mmp14 (P53690; MMP14_MOUSE). Mmp14 (Q10739; MMP14_RAT)	PGVGVPGV	MEROPS:M10.014	Endopeptidase (input)	-22.68	MEROPS score threshold (-22.96)	75	80.66		MMP14
GLPGVGVPGVGVPGVGVPG	P04985	333	351	N-terminus	Mmp12 (P34960; MMP12_MOUSE). MMP12 (P39900; MMP12_HUMAN). Mmp12 (Q63341; MMP12_RAT)	GAAGGLPG	MEROPS:M10.009	Endopeptidase (input)	-17.34	MEROPS score threshold (-22.75)	67	88.47		Mmp12
GLPGVGVPGVGVPGVGVPG	P04985	333	351	N-terminus	Mmp13 (P23097; MMP13_RAT). Mmp13 (P33435; MMP13_MOUSE). MMP13 (P45452; MMP13_HUMAN)	GAAGGLPG	MEROPS:M10.013	Endopeptidase (input)	-20.36	MEROPS score threshold (-23.33)	70	93.66		Mmp13
GLPGVGVPGVGVPGVGVPG	P04985	333	351	N-terminus	MMP14 (P50281; MMP14_HUMAN). Mmp14 (P53690; MMP14_MOUSE). Mmp14 (Q10739; MMP14_RAT)	GAAGGLPG	MEROPS:M10.014	Endopeptidase (input)	-20.48	MEROPS score threshold (-22.96)	75	80.66		MMP14
GLPGVGVPGVGVPGVGVPG	P04985	333	351	C-terminus	Mmp12 (P34960; MMP12_MOUSE). MMP12 (P39900; MMP12_HUMAN). Mmp12 (Q63341; MMP12_RAT)	GVPGVGVP	MEROPS:M10.009	Endopeptidase (input)	-17.57	MEROPS score threshold (-22.75)	67	88.47		Mmp12
GLPGVGVPGVGVPGVGVPG	P04985	333	351	C-terminus	Mmp13 (P23097; MMP13_RAT). Mmp13 (P33435; MMP13_MOUSE). MMP13 (P45452; MMP13_HUMAN)	GVPGVGVP	MEROPS:M10.013	Endopeptidase (input)	-19.92	MEROPS score threshold (-23.33)	70	93.66		Mmp13
GLPGVGVPGVGVPGVGVPG	P04985	333	351	C-terminus	MMP14 (P50281; MMP14_HUMAN). Mmp14 (P53690; MMP14_MOUSE). Mmp14 (Q10739; MMP14_RAT)	GVPGVGVP	MEROPS:M10.014	Endopeptidase (input)	-21.95	MEROPS score threshold (-22.96)	75	80.66		MMP14
DPASGEGVPPG	P01267	1128	1138	C-terminus	Mmp12 (P34960; MMP12_MOUSE). MMP12 (P39900; MMP12_HUMAN). Mmp12 (Q63341; MMP12_RAT)	VPPGTNSS	MEROPS:M10.009	Endopeptidase (input)	-21.96	MEROPS score threshold (-22.75)	67	88.47		Mmp12
DPASGEGVPPG	P01267	1128	1138	C-terminus	Mmp13 (P23097; MMP13_RAT). Mmp13 (P33435; MMP13_MOUSE). MMP13 (P45452; MMP13_HUMAN)	VPPGTNSS	MEROPS:M10.013	Endopeptidase (input)	-19.87	MEROPS score threshold (-23.33)	70	93.66		Mmp13
DPASGEGVPPG	P01267	1128	1138	C-terminus	MMP14 (P50281; MMP14_HUMAN). Mmp14 (P53690; MMP14_MOUSE). Mmp14 (Q10739; MMP14_RAT)	VPPGTNSS	MEROPS:M10.014	Endopeptidase (input)	-20.13	MEROPS score threshold (-22.96)	75	80.66		MMP14
YRIIATTEG	P10861	163	171	C-terminus	Mmp12 (P34960; MMP12_MOUSE). MMP12 (P39900; MMP12_HUMAN). Mmp12 (Q63341; MMP12_RAT)	TTEGLTGL	MEROPS:M10.009	Endopeptidase (input)	-19.99	MEROPS score threshold (-22.75)	67	88.47		Mmp12
YRIIATTEG	P10861	163	171	C-terminus	Mmp13 (P23097; MMP13_RAT). Mmp13 (P33435; MMP13_MOUSE). MMP13 (P45452; MMP13_HUMAN)	TTEGLTGL	MEROPS:M10.013	Endopeptidase (input)	-20.45	MEROPS score threshold (-23.33)	70	93.66		Mmp13
YRIIATTEG	P10861	163	171	C-terminus	MMP14 (P50281; MMP14_HUMAN). Mmp14 (P53690; MMP14_MOUSE). Mmp14 (Q10739; MMP14_RAT)	TTEGLTGL	MEROPS:M10.014	Endopeptidase (input)	-20.75	MEROPS score threshold (-22.96)	75	80.66		MMP14
GFPPLPPPPPQLPT	P09851	129	142	N-terminus	Mmp12 (P34960; MMP12_MOUSE). MMP12 (P39900; MMP12_HUMAN). Mmp12 (Q63341; MMP12_RAT)	GAGGGFPP	MEROPS:M10.009	Endopeptidase (input)	-18.05	MEROPS score threshold (-22.75)	67	88.47		Mmp12
GFPPLPPPPPQLPT	P09851	129	142	N-terminus	Mmp13 (P23097; MMP13_RAT). Mmp13 (P33435; MMP13_MOUSE). MMP13 (P45452; MMP13_HUMAN)	GAGGGFPP	MEROPS:M10.013	Endopeptidase (input)	-21.51	MEROPS score threshold (-23.33)	70	93.66		Mmp13
GFPPLPPPPPQLPT	P09851	129	142	N-terminus	MMP14 (P50281; MMP14_HUMAN). Mmp14 (P53690; MMP14_MOUSE). Mmp14 (Q10739; MMP14_RAT)	GAGGGFPP	MEROPS:M10.014	Endopeptidase (input)	-20.78	MEROPS score threshold (-22.96)	75	80.66		MMP14
GFPPLPPPPPQLPT	P09851	129	142	C-terminus	Mmp12 (P34960; MMP12_MOUSE). MMP12 (P39900; MMP12_HUMAN). Mmp12 (Q63341; MMP12_RAT)	QLPTLGAG	MEROPS:M10.009	Endopeptidase (input)	-18.23	MEROPS score threshold (-22.75)	67	88.47		Mmp12
GFPPLPPPPPQLPT	P09851	129	142	C-terminus	Mmp13 (P23097; MMP13_RAT). Mmp13 (P33435; MMP13_MOUSE). MMP13 (P45452; MMP13_HUMAN)	QLPTLGAG	MEROPS:M10.013	Endopeptidase (input)	-22.69	MEROPS score threshold (-23.33)	70	93.66		Mmp13
GFPPLPPPPPQLPT	P09851	129	142	C-terminus	MMP14 (P50281; MMP14_HUMAN). Mmp14 (P53690; MMP14_MOUSE). Mmp14 (Q10739; MMP14_RAT)	QLPTLGAG	MEROPS:M10.014	Endopeptidase (input)	-21.38	MEROPS score threshold (-22.96)	75	80.66		MMP14
AAAAAGAGGEMAFAKG	P09851	100	115	N-terminus	Mmp12 (P34960; MMP12_MOUSE). MMP12 (P39900; MMP12_HUMAN). Mmp12 (Q63341; MMP12_RAT)	VAGVAAAA	MEROPS:M10.009	Endopeptidase (input)	-15.27	MEROPS score threshold (-22.75)	67	88.47		Mmp12
AAAAAGAGGEMAFAKG	P09851	100	115	C-terminus	Mmp12 (P34960; MMP12_MOUSE). MMP12 (P39900; MMP12_HUMAN). Mmp12 (Q63341; MMP12_RAT)	FAKGTTSL	MEROPS:M10.009	Endopeptidase (input)	-22.26	MEROPS score threshold (-22.75)	67	88.47		Mmp12
AAAAAGAGGEMAFAKG	P09851	100	115	C-terminus	Mmp13 (P23097; MMP13_RAT). Mmp13 (P33435; MMP13_MOUSE). MMP13 (P45452; MMP13_HUMAN)	FAKGTTSL	MEROPS:M10.013	Endopeptidase (input)	-21.34	MEROPS score threshold (-23.33)	70	93.66		Mmp13
AAAAAGAGGEMAFAKG	P09851	100	115	C-terminus	MMP14 (P50281; MMP14_HUMAN). Mmp14 (P53690; MMP14_MOUSE). Mmp14 (Q10739; MMP14_RAT)	FAKGTTSL	MEROPS:M10.014	Endopeptidase (input)	-22.89	MEROPS score threshold (-22.96)	75	80.66		MMP14
LSAGGAAAGVAGVAAA	P09851	87	102	N-terminus	Mmp12 (P34960; MMP12_MOUSE). MMP12 (P39900; MMP12_HUMAN). Mmp12 (Q63341; MMP12_RAT)	GGVGLSAG	MEROPS:M10.009	Endopeptidase (input)	-15.39	MEROPS score threshold (-22.75)	67	88.47		Mmp12
LSAGGAAAGVAGVAAA	P09851	87	102	N-terminus	Mmp13 (P23097; MMP13_RAT). Mmp13 (P33435; MMP13_MOUSE). MMP13 (P45452; MMP13_HUMAN)	GGVGLSAG	MEROPS:M10.013	Endopeptidase (input)	-16.91	MEROPS score threshold (-23.33)	70	93.66		Mmp13
LSAGGAAAGVAGVAAA	P09851	87	102	N-terminus	MMP14 (P50281; MMP14_HUMAN). Mmp14 (P53690; MMP14_MOUSE). Mmp14 (Q10739; MMP14_RAT)	GGVGLSAG	MEROPS:M10.014	Endopeptidase (input)	-18	MEROPS score threshold (-22.96)	75	80.66		MMP14
LSAGGAAAGVAGVAAA	P09851	87	102	C-terminus	Mmp12 (P34960; MMP12_MOUSE). MMP12 (P39900; MMP12_HUMAN). Mmp12 (Q63341; MMP12_RAT)	VAAAAAGA	MEROPS:M10.009	Endopeptidase (input)	-13.25	MEROPS score threshold (-22.75)	67	88.47		Mmp12
LSAGGAAAGVAGVAAA	P09851	87	102	C-terminus	Mmp13 (P23097; MMP13_RAT). Mmp13 (P33435; MMP13_MOUSE). MMP13 (P45452; MMP13_HUMAN)	VAAAAAGA	MEROPS:M10.013	Endopeptidase (input)	-19.83	MEROPS score threshold (-23.33)	70	93.66		Mmp13
LSAGGAAAGVAGVAAA	P09851	87	102	C-terminus	MMP14 (P50281; MMP14_HUMAN). Mmp14 (P53690; MMP14_MOUSE). Mmp14 (Q10739; MMP14_RAT)	VAAAAAGA	MEROPS:M10.014	Endopeptidase (input)	-20.52	MEROPS score threshold (-22.96)	75	80.66		MMP14
DPATHGGASSKASSD	P07456	165	179	N-terminus	MMP14 (P50281; MMP14_HUMAN). Mmp14 (P53690; MMP14_MOUSE). Mmp14 (Q10739; MMP14_RAT)	LPTQDPAT	MEROPS:M10.014	Endopeptidase (input)	-21.75	MEROPS score threshold (-22.96)	75	80.66		MMP14
SGGYGGGSSSGGGHGGSS	P06394	468	485	N-terminus	Mmp12 (P34960; MMP12_MOUSE). MMP12 (P39900; MMP12_HUMAN). Mmp12 (Q63341; MMP12_RAT)	GGSSSGGY	MEROPS:M10.009	Endopeptidase (input)	-21.48	MEROPS score threshold (-22.75)	67	88.47		Mmp12
SGGYGGGSSSGGGHGGSS	P06394	468	485	N-terminus	MMP14 (P50281; MMP14_HUMAN). Mmp14 (P53690; MMP14_MOUSE). Mmp14 (Q10739; MMP14_RAT)	GGSSSGGY	MEROPS:M10.014	Endopeptidase (input)	-22.2	MEROPS score threshold (-22.96)	75	80.66		MMP14
SGGYGGGSSSGGGHGGSS	P06394	468	485	C-terminus	Mmp12 (P34960; MMP12_MOUSE). MMP12 (P39900; MMP12_HUMAN). Mmp12 (Q63341; MMP12_RAT)	GGSSGGSY	MEROPS:M10.009	Endopeptidase (input)	-22.72	MEROPS score threshold (-22.75)	67	88.47		Mmp12
SGGYGGGSSSGGGHGGSS	P06394	468	485	C-terminus	MMP14 (P50281; MMP14_HUMAN). Mmp14 (P53690; MMP14_MOUSE). Mmp14 (Q10739; MMP14_RAT)	GGSSGGSY	MEROPS:M10.014	Endopeptidase (input)	-22.46	MEROPS score threshold (-22.96)	75	80.66		MMP14
QSSSTSSFGGMGGGSMRFG	P08728	8	26	C-terminus	Mmp12 (P34960; MMP12_MOUSE). MMP12 (P39900; MMP12_HUMAN). Mmp12 (Q63341; MMP12_RAT)	MRFGAGGA	MEROPS:M10.009	Endopeptidase (input)	-21.08	MEROPS score threshold (-22.75)	67	88.47		Mmp12
LREARSRASTPPAAP	P00515	40	54	C-terminus	Mmp12 (P34960; MMP12_MOUSE). MMP12 (P39900; MMP12_HUMAN). Mmp12 (Q63341; MMP12_RAT)	PAAPPSGS	MEROPS:M10.009	Endopeptidase (input)	-18.89	MEROPS score threshold (-22.75)	67	88.47		Mmp12
LREARSRASTPPAAP	P00515	40	54	C-terminus	MMP14 (P50281; MMP14_HUMAN). Mmp14 (P53690; MMP14_MOUSE). Mmp14 (Q10739; MMP14_RAT)	PAAPPSGS	MEROPS:M10.014	Endopeptidase (input)	-22.7	MEROPS score threshold (-22.96)	75	80.66		MMP14
TGLAGNLLGDLHYTTEG	P0CG11	32	48	C-terminus	MMP14 (P50281; MMP14_HUMAN). Mmp14 (P53690; MMP14_MOUSE). Mmp14 (Q10739; MMP14_RAT)	TTEGIPVL	MEROPS:M10.014	Endopeptidase (input)	-22.61	MEROPS score threshold (-22.96)	75	80.66		MMP14
EKGAPGADGPAGAPGTP	P02453	932	948	N-terminus	Mmp12 (P34960; MMP12_MOUSE). MMP12 (P39900; MMP12_HUMAN). Mmp12 (Q63341; MMP12_RAT)	GPAGEKGA	MEROPS:M10.009	Endopeptidase (input)	-14.77	MEROPS score threshold (-22.75)	67	88.47		Mmp12
EKGAPGADGPAGAPGTP	P02453	932	948	N-terminus	Mmp13 (P23097; MMP13_RAT). Mmp13 (P33435; MMP13_MOUSE). MMP13 (P45452; MMP13_HUMAN)	GPAGEKGA	MEROPS:M10.013	Endopeptidase (input)	-15.26	MEROPS score threshold (-23.33)	70	93.66		Mmp13
EKGAPGADGPAGAPGTP	P02453	932	948	N-terminus	MMP14 (P50281; MMP14_HUMAN). Mmp14 (P53690; MMP14_MOUSE). Mmp14 (Q10739; MMP14_RAT)	GPAGEKGA	MEROPS:M10.014	Endopeptidase (input)	-19.58	MEROPS score threshold (-22.96)	75	80.66		MMP14
DTGAKGEPGPTGIQGPP	P02453	443	459	N-terminus	Mmp12 (P34960; MMP12_MOUSE). MMP12 (P39900; MMP12_HUMAN). Mmp12 (Q63341; MMP12_RAT)	GSKGDTGA	MEROPS:M10.009	Endopeptidase (input)	-19.28	MEROPS score threshold (-22.75)	67	88.47		Mmp12
DTGAKGEPGPTGIQGPP	P02453	443	459	N-terminus	Mmp13 (P23097; MMP13_RAT). Mmp13 (P33435; MMP13_MOUSE). MMP13 (P45452; MMP13_HUMAN)	GSKGDTGA	MEROPS:M10.013	Endopeptidase (input)	-19.89	MEROPS score threshold (-23.33)	70	93.66		Mmp13
DTGAKGEPGPTGIQGPP	P02453	443	459	N-terminus	MMP14 (P50281; MMP14_HUMAN). Mmp14 (P53690; MMP14_MOUSE). Mmp14 (Q10739; MMP14_RAT)	GSKGDTGA	MEROPS:M10.014	Endopeptidase (input)	-20.87	MEROPS score threshold (-22.96)	75	80.66		MMP14
DTGAKGEPGPTGIQGPP	P02453	443	459	C-terminus	Mmp12 (P34960; MMP12_MOUSE). MMP12 (P39900; MMP12_HUMAN). Mmp12 (Q63341; MMP12_RAT)	QGPPGPAG	MEROPS:M10.009	Endopeptidase (input)	-21.89	MEROPS score threshold (-22.75)	67	88.47		Mmp12
DTGAKGEPGPTGIQGPP	P02453	443	459	C-terminus	MMP14 (P50281; MMP14_HUMAN). Mmp14 (P53690; MMP14_MOUSE). Mmp14 (Q10739; MMP14_RAT)	QGPPGPAG	MEROPS:M10.014	Endopeptidase (input)	-22.42	MEROPS score threshold (-22.96)	75	80.66		MMP14
PAGPIGPVGARGPAGPQG	P02453	1073	1090	N-terminus	Mmp12 (P34960; MMP12_MOUSE). MMP12 (P39900; MMP12_HUMAN). Mmp12 (Q63341; MMP12_RAT)	GPAGPAGP	MEROPS:M10.009	Endopeptidase (input)	-13.96	MEROPS score threshold (-22.75)	67	88.47		Mmp12
PAGPIGPVGARGPAGPQG	P02453	1073	1090	N-terminus	MMP14 (P50281; MMP14_HUMAN). Mmp14 (P53690; MMP14_MOUSE). Mmp14 (Q10739; MMP14_RAT)	GPAGPAGP	MEROPS:M10.014	Endopeptidase (input)	-19.67	MEROPS score threshold (-22.96)	75	80.66		MMP14
PAGPIGPVGARGPAGPQG	P02453	1073	1090	C-terminus	Mmp12 (P34960; MMP12_MOUSE). MMP12 (P39900; MMP12_HUMAN). Mmp12 (Q63341; MMP12_RAT)	GPQGPRGD	MEROPS:M10.009	Endopeptidase (input)	-18.26	MEROPS score threshold (-22.75)	67	88.47		Mmp12
PAGPIGPVGARGPAGPQG	P02453	1073	1090	C-terminus	MMP14 (P50281; MMP14_HUMAN). Mmp14 (P53690; MMP14_MOUSE). Mmp14 (Q10739; MMP14_RAT)	GPQGPRGD	MEROPS:M10.014	Endopeptidase (input)	-20.39	MEROPS score threshold (-22.96)	75	80.66		MMP14
PVGPTGPVGAAG	P02465	750	761	N-terminus	Mmp12 (P34960; MMP12_MOUSE). MMP12 (P39900; MMP12_HUMAN). Mmp12 (Q63341; MMP12_RAT)	GENGPVGP	MEROPS:M10.009	Endopeptidase (input)	-20.95	MEROPS score threshold (-22.75)	67	88.47		Mmp12
PVGPTGPVGAAG	P02465	750	761	C-terminus	Mmp12 (P34960; MMP12_MOUSE). MMP12 (P39900; MMP12_HUMAN). Mmp12 (Q63341; MMP12_RAT)	GAAGPSGP	MEROPS:M10.009	Endopeptidase (input)	-15.13	MEROPS score threshold (-22.75)	67	88.47		Mmp12
PVGPTGPVGAAG	P02465	750	761	C-terminus	MMP14 (P50281; MMP14_HUMAN). Mmp14 (P53690; MMP14_MOUSE). Mmp14 (Q10739; MMP14_RAT)	GAAGPSGP	MEROPS:M10.014	Endopeptidase (input)	-20.35	MEROPS score threshold (-22.96)	75	80.66		MMP14
HPGKPGRPGERGVVGPQG	P02465	144	161	C-terminus	Mmp12 (P34960; MMP12_MOUSE). MMP12 (P39900; MMP12_HUMAN). Mmp12 (Q63341; MMP12_RAT)	GPQGARGF	MEROPS:M10.009	Endopeptidase (input)	-16.06	MEROPS score threshold (-22.75)	67	88.47		Mmp12
HPGKPGRPGERGVVGPQG	P02465	144	161	C-terminus	Mmp13 (P23097; MMP13_RAT). Mmp13 (P33435; MMP13_MOUSE). MMP13 (P45452; MMP13_HUMAN)	GPQGARGF	MEROPS:M10.013	Endopeptidase (input)	-13.83	MEROPS score threshold (-23.33)	70	93.66		Mmp13
HPGKPGRPGERGVVGPQG	P02465	144	161	C-terminus	MMP14 (P50281; MMP14_HUMAN). Mmp14 (P53690; MMP14_MOUSE). Mmp14 (Q10739; MMP14_RAT)	GPQGARGF	MEROPS:M10.014	Endopeptidase (input)	-18.89	MEROPS score threshold (-22.96)	75	80.66		MMP14
PLGIAGLTGARGLAGPPGM	P04258	790	808	N-terminus	Mmp12 (P34960; MMP12_MOUSE). MMP12 (P39900; MMP12_HUMAN). Mmp12 (Q63341; MMP12_RAT)	GAPGPLGI	MEROPS:M10.009	Endopeptidase (input)	-18.26	MEROPS score threshold (-22.75)	67	88.47		Mmp12
PLGIAGLTGARGLAGPPGM	P04258	790	808	C-terminus	Mmp12 (P34960; MMP12_MOUSE). MMP12 (P39900; MMP12_HUMAN). Mmp12 (Q63341; MMP12_RAT)	PPGMPGAR	MEROPS:M10.009	Endopeptidase (input)	-20.32	MEROPS score threshold (-22.75)	67	88.47		Mmp12
NPGPPGSSGAPGKD	P04258	733	746	N-terminus	Mmp12 (P34960; MMP12_MOUSE). MMP12 (P39900; MMP12_HUMAN). Mmp12 (Q63341; MMP12_RAT)	GSNGNPGP	MEROPS:M10.009	Endopeptidase (input)	-22.74	MEROPS score threshold (-22.75)	67	88.47		Mmp12
NPGPPGSSGAPGKD	P04258	733	746	N-terminus	Mmp13 (P23097; MMP13_RAT). Mmp13 (P33435; MMP13_MOUSE). MMP13 (P45452; MMP13_HUMAN)	GSNGNPGP	MEROPS:M10.013	Endopeptidase (input)	-21.53	MEROPS score threshold (-23.33)	70	93.66		Mmp13
NPGPPGSSGAPGKD	P04258	733	746	N-terminus	MMP14 (P50281; MMP14_HUMAN). Mmp14 (P53690; MMP14_MOUSE). Mmp14 (Q10739; MMP14_RAT)	GSNGNPGP	MEROPS:M10.014	Endopeptidase (input)	-20.6	MEROPS score threshold (-22.96)	75	80.66		MMP14
NKKKSEPSSPDHVSST	P10894	974	989	C-terminus	MMP14 (P50281; MMP14_HUMAN). Mmp14 (P53690; MMP14_MOUSE). Mmp14 (Q10739; MMP14_RAT)	VSSTIEQD	MEROPS:M10.014	Endopeptidase (input)	-22.19	MEROPS score threshold (-22.96)	75	80.66		MMP14
KNGDQHPSAT	P10895	738	747	N-terminus	Mmp13 (P23097; MMP13_RAT). Mmp13 (P33435; MMP13_MOUSE). MMP13 (P45452; MMP13_HUMAN)	HLLSKNGD	MEROPS:M10.013	Endopeptidase (input)	-21.66	MEROPS score threshold (-23.33)	70	93.66		Mmp13
KNGDQHPSAT	P10895	738	747	C-terminus	Mmp12 (P34960; MMP12_MOUSE). MMP12 (P39900; MMP12_HUMAN). Mmp12 (Q63341; MMP12_RAT)	PSATLFVK	MEROPS:M10.009	Endopeptidase (input)	-22.17	MEROPS score threshold (-22.75)	67	88.47		Mmp12
KNGDQHPSAT	P10895	738	747	C-terminus	MMP14 (P50281; MMP14_HUMAN). Mmp14 (P53690; MMP14_MOUSE). Mmp14 (Q10739; MMP14_RAT)	PSATLFVK	MEROPS:M10.014	Endopeptidase (input)	-21.28	MEROPS score threshold (-22.96)	75	80.66		MMP14
APAPSTRRPPAPNLHV	O97831	459	474	N-terminus	Mmp12 (P34960; MMP12_MOUSE). MMP12 (P39900; MMP12_HUMAN). Mmp12 (Q63341; MMP12_RAT)	PPATAPAP	MEROPS:M10.009	Endopeptidase (input)	-18.39	MEROPS score threshold (-22.75)	67	88.47		Mmp12
APAPSTRRPPAPNLHV	O97831	459	474	N-terminus	Mmp13 (P23097; MMP13_RAT). Mmp13 (P33435; MMP13_MOUSE). MMP13 (P45452; MMP13_HUMAN)	PPATAPAP	MEROPS:M10.013	Endopeptidase (input)	-20.61	MEROPS score threshold (-23.33)	70	93.66		Mmp13
APAPSTRRPPAPNLHV	O97831	459	474	N-terminus	MMP14 (P50281; MMP14_HUMAN). Mmp14 (P53690; MMP14_MOUSE). Mmp14 (Q10739; MMP14_RAT)	PPATAPAP	MEROPS:M10.014	Endopeptidase (input)	-22.21	MEROPS score threshold (-22.96)	75	80.66		MMP14
APLQPQAAEP	O77775	218	227	C-terminus	Mmp12 (P34960; MMP12_MOUSE). MMP12 (P39900; MMP12_HUMAN). Mmp12 (Q63341; MMP12_RAT)	AAEPPPRP	MEROPS:M10.009	Endopeptidase (input)	-22.48	MEROPS score threshold (-22.75)	67	88.47		Mmp12
GFGLSPIFPGGAGGLG	P04985-4	714	729	N-terminus	Mmp12 (P34960; MMP12_MOUSE). MMP12 (P39900; MMP12_HUMAN). Mmp12 (Q63341; MMP12_RAT)	AARPGFGL	MEROPS:M10.009	Endopeptidase (input)	-20.83	MEROPS score threshold (-22.75)	67	88.47		Mmp12
GFGLSPIFPGGAGGLG	P04985-4	714	729	N-terminus	Mmp13 (P23097; MMP13_RAT). Mmp13 (P33435; MMP13_MOUSE). MMP13 (P45452; MMP13_HUMAN)	AARPGFGL	MEROPS:M10.013	Endopeptidase (input)	-20.94	MEROPS score threshold (-23.33)	70	93.66		Mmp13
GFGLSPIFPGGAGGLG	P04985-4	714	729	N-terminus	MMP14 (P50281; MMP14_HUMAN). Mmp14 (P53690; MMP14_MOUSE). Mmp14 (Q10739; MMP14_RAT)	AARPGFGL	MEROPS:M10.014	Endopeptidase (input)	-21.87	MEROPS score threshold (-22.96)	75	80.66		MMP14
GFGLSPIFPGGAGGLG	P04985-4	714	729	C-terminus	Mmp12 (P34960; MMP12_MOUSE). MMP12 (P39900; MMP12_HUMAN). Mmp12 (Q63341; MMP12_RAT)	GGLGVGGK	MEROPS:M10.009	Endopeptidase (input)	-15.42	MEROPS score threshold (-22.75)	67	88.47		Mmp12
GFGLSPIFPGGAGGLG	P04985-4	714	729	C-terminus	Mmp13 (P23097; MMP13_RAT). Mmp13 (P33435; MMP13_MOUSE). MMP13 (P45452; MMP13_HUMAN)	GGLGVGGK	MEROPS:M10.013	Endopeptidase (input)	-21.08	MEROPS score threshold (-23.33)	70	93.66		Mmp13
GFGLSPIFPGGAGGLG	P04985-4	714	729	C-terminus	MMP14 (P50281; MMP14_HUMAN). Mmp14 (P53690; MMP14_MOUSE). Mmp14 (Q10739; MMP14_RAT)	GGLGVGGK	MEROPS:M10.014	Endopeptidase (input)	-21.62	MEROPS score threshold (-22.96)	75	80.66		MMP14
ATSHDSQITQEAVPKS	P38574	243	258	N-terminus	MMP14 (P50281; MMP14_HUMAN). Mmp14 (P53690; MMP14_MOUSE). Mmp14 (Q10739; MMP14_RAT)	DADGATSH	MEROPS:M10.014	Endopeptidase (input)	-22.88	MEROPS score threshold (-22.96)	75	80.66		MMP14
ATSHDSQITQEAVPKS	P38574	243	258	C-terminus	Mmp12 (P34960; MMP12_MOUSE). MMP12 (P39900; MMP12_HUMAN). Mmp12 (Q63341; MMP12_RAT)	VPKSLGTS	MEROPS:M10.009	Endopeptidase (input)	-18.75	MEROPS score threshold (-22.75)	67	88.47		Mmp12
ATSHDSQITQEAVPKS	P38574	243	258	C-terminus	Mmp13 (P23097; MMP13_RAT). Mmp13 (P33435; MMP13_MOUSE). MMP13 (P45452; MMP13_HUMAN)	VPKSLGTS	MEROPS:M10.013	Endopeptidase (input)	-22.25	MEROPS score threshold (-23.33)	70	93.66		Mmp13
ATSHDSQITQEAVPKS	P38574	243	258	C-terminus	MMP14 (P50281; MMP14_HUMAN). Mmp14 (P53690; MMP14_MOUSE). Mmp14 (Q10739; MMP14_RAT)	VPKSLGTS	MEROPS:M10.014	Endopeptidase (input)	-19.84	MEROPS score threshold (-22.96)	75	80.66		MMP14
RSGSIIDQTRVLN	P48733	590	602	C-terminus	Mmp12 (P34960; MMP12_MOUSE). MMP12 (P39900; MMP12_HUMAN). Mmp12 (Q63341; MMP12_RAT)	RVLNLGPI	MEROPS:M10.009	Endopeptidase (input)	-20.9	MEROPS score threshold (-22.75)	67	88.47		Mmp12
RSGSIIDQTRVLN	P48733	590	602	C-terminus	MMP14 (P50281; MMP14_HUMAN). Mmp14 (P53690; MMP14_MOUSE). Mmp14 (Q10739; MMP14_RAT)	RVLNLGPI	MEROPS:M10.014	Endopeptidase (input)	-22.2	MEROPS score threshold (-22.96)	75	80.66		MMP14
RGSLESTLAHGLKNGMK	P17810	123	139	N-terminus	MMP14 (P50281; MMP14_HUMAN). Mmp14 (P53690; MMP14_MOUSE). Mmp14 (Q10739; MMP14_RAT)	FLLRGSLE	MEROPS:M10.014	Endopeptidase (input)	-21.23	MEROPS score threshold (-22.96)	75	80.66		MMP14
LPGGFPGGAMPSQYPGGQS	P20072	119	137	N-terminus	Mmp12 (P34960; MMP12_MOUSE). MMP12 (P39900; MMP12_HUMAN). Mmp12 (Q63341; MMP12_RAT)	AQVPLPGG	MEROPS:M10.009	Endopeptidase (input)	-20.06	MEROPS score threshold (-22.75)	67	88.47		Mmp12
LPGGFPGGAMPSQYPGGQS	P20072	119	137	N-terminus	Mmp13 (P23097; MMP13_RAT). Mmp13 (P33435; MMP13_MOUSE). MMP13 (P45452; MMP13_HUMAN)	AQVPLPGG	MEROPS:M10.013	Endopeptidase (input)	-19.85	MEROPS score threshold (-23.33)	70	93.66		Mmp13
LPGGFPGGAMPSQYPGGQS	P20072	119	137	N-terminus	MMP14 (P50281; MMP14_HUMAN). Mmp14 (P53690; MMP14_MOUSE). Mmp14 (Q10739; MMP14_RAT)	AQVPLPGG	MEROPS:M10.014	Endopeptidase (input)	-20.81	MEROPS score threshold (-22.96)	75	80.66		MMP14
LSSCSSQSLQLTSCL	P35833	82	96	N-terminus	Mmp12 (P34960; MMP12_MOUSE). MMP12 (P39900; MMP12_HUMAN). Mmp12 (Q63341; MMP12_RAT)	PQAPLSSC	MEROPS:M10.009	Endopeptidase (input)	-22.51	MEROPS score threshold (-22.75)	67	88.47		Mmp12
SVVVGPSVVAV	P12763	290	300	N-terminus	Mmp12 (P34960; MMP12_MOUSE). MMP12 (P39900; MMP12_HUMAN). Mmp12 (Q63341; MMP12_RAT)	PPVASVVV	MEROPS:M10.009	Endopeptidase (input)	-21.66	MEROPS score threshold (-22.75)	67	88.47		Mmp12
SVVVGPSVVAV	P12763	290	300	N-terminus	Mmp13 (P23097; MMP13_RAT). Mmp13 (P33435; MMP13_MOUSE). MMP13 (P45452; MMP13_HUMAN)	PPVASVVV	MEROPS:M10.013	Endopeptidase (input)	-21.51	MEROPS score threshold (-23.33)	70	93.66		Mmp13
SVVVGPSVVAV	P12763	290	300	N-terminus	MMP14 (P50281; MMP14_HUMAN). Mmp14 (P53690; MMP14_MOUSE). Mmp14 (Q10739; MMP14_RAT)	PPVASVVV	MEROPS:M10.014	Endopeptidase (input)	-21.13	MEROPS score threshold (-22.96)	75	80.66		MMP14
FMMVVISLDRSLAIT	P32236	130	144	C-terminus	Mmp12 (P34960; MMP12_MOUSE). MMP12 (P39900; MMP12_HUMAN). Mmp12 (Q63341; MMP12_RAT)	LAITKPLA	MEROPS:M10.009	Endopeptidase (input)	-22.45	MEROPS score threshold (-22.75)	67	88.47		Mmp12
LVLLLVQVQPSLGKESA	P39873	14	30	N-terminus	Mmp12 (P34960; MMP12_MOUSE). MMP12 (P39900; MMP12_HUMAN). Mmp12 (Q63341; MMP12_RAT)	SLLVLVLL	MEROPS:M10.009	Endopeptidase (input)	-20.9	MEROPS score threshold (-22.75)	67	88.47		Mmp12
LVLLLVQVQPSLGKESA	P39873	14	30	N-terminus	Mmp13 (P23097; MMP13_RAT). Mmp13 (P33435; MMP13_MOUSE). MMP13 (P45452; MMP13_HUMAN)	SLLVLVLL	MEROPS:M10.013	Endopeptidase (input)	-22.98	MEROPS score threshold (-23.33)	70	93.66		Mmp13
LVLLLVQVQPSLGKESA	P39873	14	30	C-terminus	Mmp12 (P34960; MMP12_MOUSE). MMP12 (P39900; MMP12_HUMAN). Mmp12 (Q63341; MMP12_RAT)	KESAAAKF	MEROPS:M10.009	Endopeptidase (input)	-22.25	MEROPS score threshold (-22.75)	67	88.47		Mmp12
VKGIPLIKYFAEALGPLES	P50227	15	33	N-terminus	Mmp12 (P34960; MMP12_MOUSE). MMP12 (P39900; MMP12_HUMAN). Mmp12 (Q63341; MMP12_RAT)	PAKYVKGI	MEROPS:M10.009	Endopeptidase (input)	-20.17	MEROPS score threshold (-22.75)	67	88.47		Mmp12
VKGIPLIKYFAEALGPLES	P50227	15	33	N-terminus	Mmp13 (P23097; MMP13_RAT). Mmp13 (P33435; MMP13_MOUSE). MMP13 (P45452; MMP13_HUMAN)	PAKYVKGI	MEROPS:M10.013	Endopeptidase (input)	-22.6	MEROPS score threshold (-23.33)	70	93.66		Mmp13
VMRPEMIMKSIIPVV	P23956	46	60	C-terminus	Mmp13 (P23097; MMP13_RAT). Mmp13 (P33435; MMP13_MOUSE). MMP13 (P45452; MMP13_HUMAN)	IPVVMAGI	MEROPS:M10.013	Endopeptidase (input)	-21.01	MEROPS score threshold (-23.33)	70	93.66		Mmp13
SGTGIAAMSVMR	P23956	37	48	N-terminus	Mmp12 (P34960; MMP12_MOUSE). MMP12 (P39900; MMP12_HUMAN). Mmp12 (Q63341; MMP12_RAT)	GTAKSGTG	MEROPS:M10.009	Endopeptidase (input)	-19.68	MEROPS score threshold (-22.75)	67	88.47		Mmp12
SGTGIAAMSVMR	P23956	37	48	N-terminus	MMP14 (P50281; MMP14_HUMAN). Mmp14 (P53690; MMP14_MOUSE). Mmp14 (Q10739; MMP14_RAT)	GTAKSGTG	MEROPS:M10.014	Endopeptidase (input)	-22.22	MEROPS score threshold (-22.96)	75	80.66		MMP14
LGLLSGPRSAH	P30404	12	22	N-terminus	Mmp12 (P34960; MMP12_MOUSE). MMP12 (P39900; MMP12_HUMAN). Mmp12 (Q63341; MMP12_RAT)	GPRLLGLL	MEROPS:M10.009	Endopeptidase (input)	-18.35	MEROPS score threshold (-22.75)	67	88.47		Mmp12
LGLLSGPRSAH	P30404	12	22	N-terminus	Mmp13 (P23097; MMP13_RAT). Mmp13 (P33435; MMP13_MOUSE). MMP13 (P45452; MMP13_HUMAN)	GPRLLGLL	MEROPS:M10.013	Endopeptidase (input)	-21.4	MEROPS score threshold (-23.33)	70	93.66		Mmp13
LGLLSGPRSAH	P30404	12	22	N-terminus	MMP14 (P50281; MMP14_HUMAN). Mmp14 (P53690; MMP14_MOUSE). Mmp14 (Q10739; MMP14_RAT)	GPRLLGLL	MEROPS:M10.014	Endopeptidase (input)	-20.62	MEROPS score threshold (-22.96)	75	80.66		MMP14
LGLLSGPRSAH	P30404	12	22	C-terminus	Mmp12 (P34960; MMP12_MOUSE). MMP12 (P39900; MMP12_HUMAN). Mmp12 (Q63341; MMP12_RAT)	RSAHLRLP	MEROPS:M10.009	Endopeptidase (input)	-20.8	MEROPS score threshold (-22.75)	67	88.47		Mmp12
LGLLSGPRSAH	P30404	12	22	C-terminus	MMP14 (P50281; MMP14_HUMAN). Mmp14 (P53690; MMP14_MOUSE). Mmp14 (Q10739; MMP14_RAT)	RSAHLRLP	MEROPS:M10.014	Endopeptidase (input)	-18.4	MEROPS score threshold (-22.96)	75	80.66		MMP14
LGLLSGPRSAH	P30404	12	22	C-terminus	Mmp17 (Q9R0S3; MMP17_MOUSE). MMP17 (Q9ULZ9; MMP17_HUMAN)	RSAHLRLP	MEROPS:M10.017	Endopeptidase (input)	-16.43	99th percentile (-17.12)	0	99.95		Mmp17
GLPVGAGPGALQGSGL	P19754	1101	1116	N-terminus	Mmp12 (P34960; MMP12_MOUSE). MMP12 (P39900; MMP12_HUMAN). Mmp12 (Q63341; MMP12_RAT)	PPAAGLPV	MEROPS:M10.009	Endopeptidase (input)	-19.67	MEROPS score threshold (-22.75)	67	88.47		Mmp12
GLPVGAGPGALQGSGL	P19754	1101	1116	N-terminus	Mmp13 (P23097; MMP13_RAT). Mmp13 (P33435; MMP13_MOUSE). MMP13 (P45452; MMP13_HUMAN)	PPAAGLPV	MEROPS:M10.013	Endopeptidase (input)	-23.21	MEROPS score threshold (-23.33)	70	93.66		Mmp13
GLPVGAGPGALQGSGL	P19754	1101	1116	N-terminus	MMP14 (P50281; MMP14_HUMAN). Mmp14 (P53690; MMP14_MOUSE). Mmp14 (Q10739; MMP14_RAT)	PPAAGLPV	MEROPS:M10.014	Endopeptidase (input)	-21.99	MEROPS score threshold (-22.96)	75	80.66		MMP14
GLPVGAGPGALQGSGL	P19754	1101	1116	C-terminus	Mmp12 (P34960; MMP12_MOUSE). MMP12 (P39900; MMP12_HUMAN). Mmp12 (Q63341; MMP12_RAT)	GSGLAPGP	MEROPS:M10.009	Endopeptidase (input)	-19.73	MEROPS score threshold (-22.75)	67	88.47		Mmp12
GLPVGAGPGALQGSGL	P19754	1101	1116	C-terminus	Mmp13 (P23097; MMP13_RAT). Mmp13 (P33435; MMP13_MOUSE). MMP13 (P45452; MMP13_HUMAN)	GSGLAPGP	MEROPS:M10.013	Endopeptidase (input)	-22.82	MEROPS score threshold (-23.33)	70	93.66		Mmp13
GLPVGAGPGALQGSGL	P19754	1101	1116	C-terminus	MMP14 (P50281; MMP14_HUMAN). Mmp14 (P53690; MMP14_MOUSE). Mmp14 (Q10739; MMP14_RAT)	GSGLAPGP	MEROPS:M10.014	Endopeptidase (input)	-22.79	MEROPS score threshold (-22.96)	75	80.66		MMP14
KRSNHSKIIEDSDRSVK	P24275	137	153	C-terminus	MMP14 (P50281; MMP14_HUMAN). Mmp14 (P53690; MMP14_MOUSE). Mmp14 (Q10739; MMP14_RAT)	RSVKVQEA	MEROPS:M10.014	Endopeptidase (input)	-20.68	MEROPS score threshold (-22.96)	75	80.66		MMP14
DSCIMSIGFDHMEGLQY	P22027	94	110	C-terminus	MMP14 (P50281; MMP14_HUMAN). Mmp14 (P53690; MMP14_MOUSE). Mmp14 (Q10739; MMP14_RAT)	GLQYVEKI	MEROPS:M10.014	Endopeptidase (input)	-22.17	MEROPS score threshold (-22.96)	75	80.66		MMP14
PGIQLKAVKSSTGPG	P35445	632	646	N-terminus	Mmp12 (P34960; MMP12_MOUSE). MMP12 (P39900; MMP12_HUMAN). Mmp12 (Q63341; MMP12_RAT)	AVAEPGIQ	MEROPS:M10.009	Endopeptidase (input)	-21.85	MEROPS score threshold (-22.75)	67	88.47		Mmp12
DPPTVELQGLVPRG	P12260	26	39	C-terminus	Mmp13 (P23097; MMP13_RAT). Mmp13 (P33435; MMP13_MOUSE). MMP13 (P45452; MMP13_HUMAN)	VPRGFNPQ	MEROPS:M10.013	Endopeptidase (input)	-20.41	MEROPS score threshold (-23.33)	70	93.66		Mmp13
DPPTVELQGLVPRG	P12260	26	39	C-terminus	MMP14 (P50281; MMP14_HUMAN). Mmp14 (P53690; MMP14_MOUSE). Mmp14 (Q10739; MMP14_RAT)	VPRGFNPQ	MEROPS:M10.014	Endopeptidase (input)	-21.86	MEROPS score threshold (-22.96)	75	80.66		MMP14
PALEPPTLPLHHA	P23726	204	216	N-terminus	Mmp12 (P34960; MMP12_MOUSE). MMP12 (P39900; MMP12_HUMAN). Mmp12 (Q63341; MMP12_RAT)	GPVGPALE	MEROPS:M10.009	Endopeptidase (input)	-18.95	MEROPS score threshold (-22.75)	67	88.47		Mmp12
PALEPPTLPLHHA	P23726	204	216	N-terminus	MMP14 (P50281; MMP14_HUMAN). Mmp14 (P53690; MMP14_MOUSE). Mmp14 (Q10739; MMP14_RAT)	GPVGPALE	MEROPS:M10.014	Endopeptidase (input)	-20.27	MEROPS score threshold (-22.96)	75	80.66		MMP14
PALEPPTLPLHHA	P23726	204	216	C-terminus	MMP14 (P50281; MMP14_HUMAN). Mmp14 (P53690; MMP14_MOUSE). Mmp14 (Q10739; MMP14_RAT)	LHHALTLR	MEROPS:M10.014	Endopeptidase (input)	-21.24	MEROPS score threshold (-22.96)	75	80.66		MMP14
RKFEDATVQSDMKHWP	P34933	77	92	N-terminus	MMP14 (P50281; MMP14_HUMAN). Mmp14 (P53690; MMP14_MOUSE). Mmp14 (Q10739; MMP14_RAT)	RLIGRKFE	MEROPS:M10.014	Endopeptidase (input)	-22.43	MEROPS score threshold (-22.96)	75	80.66		MMP14
PGGMPGGMPGGFPGGGAPP	P19120	618	636	N-terminus	Mmp12 (P34960; MMP12_MOUSE). MMP12 (P39900; MMP12_HUMAN). Mmp12 (Q63341; MMP12_RAT)	AGGMPGGM	MEROPS:M10.009	Endopeptidase (input)	-22.69	MEROPS score threshold (-22.75)	67	88.47		Mmp12
PGGMPGGMPGGFPGGGAPP	P19120	618	636	C-terminus	Mmp12 (P34960; MMP12_MOUSE). MMP12 (P39900; MMP12_HUMAN). Mmp12 (Q63341; MMP12_RAT)	GAPPSGGA	MEROPS:M10.009	Endopeptidase (input)	-16.5	MEROPS score threshold (-22.75)	67	88.47		Mmp12
PGGMPGGMPGGFPGGGAPP	P19120	618	636	C-terminus	Mmp13 (P23097; MMP13_RAT). Mmp13 (P33435; MMP13_MOUSE). MMP13 (P45452; MMP13_HUMAN)	GAPPSGGA	MEROPS:M10.013	Endopeptidase (input)	-20.45	MEROPS score threshold (-23.33)	70	93.66		Mmp13
PGGMPGGMPGGFPGGGAPP	P19120	618	636	C-terminus	MMP14 (P50281; MMP14_HUMAN). Mmp14 (P53690; MMP14_MOUSE). Mmp14 (Q10739; MMP14_RAT)	GAPPSGGA	MEROPS:M10.014	Endopeptidase (input)	-21.81	MEROPS score threshold (-22.96)	75	80.66		MMP14
LPVDTFLRGHEEGG	P35384	369	382	N-terminus	MMP14 (P50281; MMP14_HUMAN). Mmp14 (P53690; MMP14_MOUSE). Mmp14 (Q10739; MMP14_RAT)	AKGPLPVD	MEROPS:M10.014	Endopeptidase (input)	-22.93	MEROPS score threshold (-22.96)	75	80.66		MMP14
LPVDTFLRGHEEGG	P35384	369	382	C-terminus	Mmp12 (P34960; MMP12_MOUSE). MMP12 (P39900; MMP12_HUMAN). Mmp12 (Q63341; MMP12_RAT)	EEGGARLS	MEROPS:M10.009	Endopeptidase (input)	-20.83	MEROPS score threshold (-22.75)	67	88.47		Mmp12
LPVDTFLRGHEEGG	P35384	369	382	C-terminus	MMP14 (P50281; MMP14_HUMAN). Mmp14 (P53690; MMP14_MOUSE). Mmp14 (Q10739; MMP14_RAT)	EEGGARLS	MEROPS:M10.014	Endopeptidase (input)	-22.22	MEROPS score threshold (-22.96)	75	80.66		MMP14
MAVRNNLAGAE	P49951	351	361	N-terminus	Mmp13 (P23097; MMP13_RAT). Mmp13 (P33435; MMP13_MOUSE). MMP13 (P45452; MMP13_HUMAN)	LALRMAVR	MEROPS:M10.013	Endopeptidase (input)	-22.23	MEROPS score threshold (-23.33)	70	93.66		Mmp13
MAVRNNLAGAE	P49951	351	361	N-terminus	MMP14 (P50281; MMP14_HUMAN). Mmp14 (P53690; MMP14_MOUSE). Mmp14 (Q10739; MMP14_RAT)	LALRMAVR	MEROPS:M10.014	Endopeptidase (input)	-20.42	MEROPS score threshold (-22.96)	75	80.66		MMP14
MAVRNNLAGAE	P49951	351	361	C-terminus	Mmp12 (P34960; MMP12_MOUSE). MMP12 (P39900; MMP12_HUMAN). Mmp12 (Q63341; MMP12_RAT)	AGAEELFA	MEROPS:M10.009	Endopeptidase (input)	-22.16	MEROPS score threshold (-22.75)	67	88.47		Mmp12
LPGPSGNMGPQGPKGIP	P23206	336	352	N-terminus	Mmp12 (P34960; MMP12_MOUSE). MMP12 (P39900; MMP12_HUMAN). Mmp12 (Q63341; MMP12_RAT)	GEAGLPGP	MEROPS:M10.009	Endopeptidase (input)	-16.56	MEROPS score threshold (-22.75)	67	88.47		Mmp12
LPGPSGNMGPQGPKGIP	P23206	336	352	N-terminus	Mmp13 (P23097; MMP13_RAT). Mmp13 (P33435; MMP13_MOUSE). MMP13 (P45452; MMP13_HUMAN)	GEAGLPGP	MEROPS:M10.013	Endopeptidase (input)	-17	MEROPS score threshold (-23.33)	70	93.66		Mmp13
LPGPSGNMGPQGPKGIP	P23206	336	352	N-terminus	MMP14 (P50281; MMP14_HUMAN). Mmp14 (P53690; MMP14_MOUSE). Mmp14 (Q10739; MMP14_RAT)	GEAGLPGP	MEROPS:M10.014	Endopeptidase (input)	-19.08	MEROPS score threshold (-22.96)	75	80.66		MMP14
PTGPPGPPGPRGNAGE	P23206	488	503	N-terminus	Mmp12 (P34960; MMP12_MOUSE). MMP12 (P39900; MMP12_HUMAN). Mmp12 (Q63341; MMP12_RAT)	GLNGPTGP	MEROPS:M10.009	Endopeptidase (input)	-20.03	MEROPS score threshold (-22.75)	67	88.47		Mmp12
PTGPPGPPGPRGNAGE	P23206	488	503	N-terminus	MMP14 (P50281; MMP14_HUMAN). Mmp14 (P53690; MMP14_MOUSE). Mmp14 (Q10739; MMP14_RAT)	GLNGPTGP	MEROPS:M10.014	Endopeptidase (input)	-22.57	MEROPS score threshold (-22.96)	75	80.66		MMP14
PTGPPGPPGPRGNAGE	P23206	488	503	C-terminus	Mmp12 (P34960; MMP12_MOUSE). MMP12 (P39900; MMP12_HUMAN). Mmp12 (Q63341; MMP12_RAT)	NAGEPGLP	MEROPS:M10.009	Endopeptidase (input)	-19.84	MEROPS score threshold (-22.75)	67	88.47		Mmp12
NGPTGPPGPPGPRGNAGEP	P23206	486	504	C-terminus	Mmp12 (P34960; MMP12_MOUSE). MMP12 (P39900; MMP12_HUMAN). Mmp12 (Q63341; MMP12_RAT)	AGEPGLPG	MEROPS:M10.009	Endopeptidase (input)	-21.87	MEROPS score threshold (-22.75)	67	88.47		Mmp12
YRAVTYHNWRHGFN	P16586	551	564	N-terminus	Mmp12 (P34960; MMP12_MOUSE). MMP12 (P39900; MMP12_HUMAN). Mmp12 (Q63341; MMP12_RAT)	VRKGYRAV	MEROPS:M10.009	Endopeptidase (input)	-21.21	MEROPS score threshold (-22.75)	67	88.47		Mmp12
YRAVTYHNWRHGFN	P16586	551	564	N-terminus	Mmp13 (P23097; MMP13_RAT). Mmp13 (P33435; MMP13_MOUSE). MMP13 (P45452; MMP13_HUMAN)	VRKGYRAV	MEROPS:M10.013	Endopeptidase (input)	-21.48	MEROPS score threshold (-23.33)	70	93.66		Mmp13
YRAVTYHNWRHGFN	P16586	551	564	N-terminus	MMP14 (P50281; MMP14_HUMAN). Mmp14 (P53690; MMP14_MOUSE). Mmp14 (Q10739; MMP14_RAT)	VRKGYRAV	MEROPS:M10.014	Endopeptidase (input)	-22.46	MEROPS score threshold (-22.96)	75	80.66		MMP14
VVVKCDGRGSGFQG	P42659	654	667	C-terminus	Mmp12 (P34960; MMP12_MOUSE). MMP12 (P39900; MMP12_HUMAN). Mmp12 (Q63341; MMP12_RAT)	GFQGTRLL	MEROPS:M10.009	Endopeptidase (input)	-22.71	MEROPS score threshold (-22.75)	67	88.47		Mmp12
VVVKCDGRGSGFQG	P42659	654	667	C-terminus	MMP14 (P50281; MMP14_HUMAN). Mmp14 (P53690; MMP14_MOUSE). Mmp14 (Q10739; MMP14_RAT)	GFQGTRLL	MEROPS:M10.014	Endopeptidase (input)	-20.21	MEROPS score threshold (-22.96)	75	80.66		MMP14
SVLPSGEGHLETSS	P13608	1249	1262	C-terminus	MMP14 (P50281; MMP14_HUMAN). Mmp14 (P53690; MMP14_MOUSE). Mmp14 (Q10739; MMP14_RAT)	ETSSGVED	MEROPS:M10.014	Endopeptidase (input)	-22.67	MEROPS score threshold (-22.96)	75	80.66		MMP14
PGRIGISGDSAGGNLAAAV	Q0P5B7	180	198	C-terminus	Mmp12 (P34960; MMP12_MOUSE). MMP12 (P39900; MMP12_HUMAN). Mmp12 (Q63341; MMP12_RAT)	AAAVAQQL	MEROPS:M10.009	Endopeptidase (input)	-19.22	MEROPS score threshold (-22.75)	67	88.47		Mmp12
PGRIGISGDSAGGNLAAAV	Q0P5B7	180	198	C-terminus	Mmp13 (P23097; MMP13_RAT). Mmp13 (P33435; MMP13_MOUSE). MMP13 (P45452; MMP13_HUMAN)	AAAVAQQL	MEROPS:M10.013	Endopeptidase (input)	-23.32	MEROPS score threshold (-23.33)	70	93.66		Mmp13
LDLQVISPQPRSIGLIAG	Q08DK1	228	245	C-terminus	Mmp12 (P34960; MMP12_MOUSE). MMP12 (P39900; MMP12_HUMAN). Mmp12 (Q63341; MMP12_RAT)	LIAGAIGT	MEROPS:M10.009	Endopeptidase (input)	-19.36	MEROPS score threshold (-22.75)	67	88.47		Mmp12
LDLQVISPQPRSIGLIAG	Q08DK1	228	245	C-terminus	Mmp13 (P23097; MMP13_RAT). Mmp13 (P33435; MMP13_MOUSE). MMP13 (P45452; MMP13_HUMAN)	LIAGAIGT	MEROPS:M10.013	Endopeptidase (input)	-19.54	MEROPS score threshold (-23.33)	70	93.66		Mmp13
LDLQVISPQPRSIGLIAG	Q08DK1	228	245	C-terminus	MMP14 (P50281; MMP14_HUMAN). Mmp14 (P53690; MMP14_MOUSE). Mmp14 (Q10739; MMP14_RAT)	LIAGAIGT	MEROPS:M10.014	Endopeptidase (input)	-22.44	MEROPS score threshold (-22.96)	75	80.66		MMP14
MMGQSGQGGGVMGQRPMAP	Q08E31	221	239	N-terminus	MMP14 (P50281; MMP14_HUMAN). Mmp14 (P53690; MMP14_MOUSE). Mmp14 (Q10739; MMP14_RAT)	QSMAMMGQ	MEROPS:M10.014	Endopeptidase (input)	-22.51	MEROPS score threshold (-22.96)	75	80.66		MMP14
VLLQAHNHHY	Q01888	60	69	N-terminus	MMP14 (P50281; MMP14_HUMAN). Mmp14 (P53690; MMP14_MOUSE). Mmp14 (Q10739; MMP14_RAT)	DRVKVLLQ	MEROPS:M10.014	Endopeptidase (input)	-22.94	MEROPS score threshold (-22.96)	75	80.66		MMP14
TPDAGLWSPSPGRR	P55106	334	347	N-terminus	Mmp12 (P34960; MMP12_MOUSE). MMP12 (P39900; MMP12_HUMAN). Mmp12 (Q63341; MMP12_RAT)	PPSGTPDA	MEROPS:M10.009	Endopeptidase (input)	-21.84	MEROPS score threshold (-22.75)	67	88.47		Mmp12
TPDAGLWSPSPGRR	P55106	334	347	N-terminus	Mmp13 (P23097; MMP13_RAT). Mmp13 (P33435; MMP13_MOUSE). MMP13 (P45452; MMP13_HUMAN)	PPSGTPDA	MEROPS:M10.013	Endopeptidase (input)	-20.61	MEROPS score threshold (-23.33)	70	93.66		Mmp13
TPDAGLWSPSPGRR	P55106	334	347	N-terminus	MMP14 (P50281; MMP14_HUMAN). Mmp14 (P53690; MMP14_MOUSE). Mmp14 (Q10739; MMP14_RAT)	PPSGTPDA	MEROPS:M10.014	Endopeptidase (input)	-20.96	MEROPS score threshold (-22.96)	75	80.66		MMP14
ASAAKSPLLNSPT	Q08DG7	138	150	N-terminus	Mmp12 (P34960; MMP12_MOUSE). MMP12 (P39900; MMP12_HUMAN). Mmp12 (Q63341; MMP12_RAT)	NPTPASAA	MEROPS:M10.009	Endopeptidase (input)	-19.24	MEROPS score threshold (-22.75)	67	88.47		Mmp12
ASAAKSPLLNSPT	Q08DG7	138	150	N-terminus	Mmp13 (P23097; MMP13_RAT). Mmp13 (P33435; MMP13_MOUSE). MMP13 (P45452; MMP13_HUMAN)	NPTPASAA	MEROPS:M10.013	Endopeptidase (input)	-22.22	MEROPS score threshold (-23.33)	70	93.66		Mmp13
ASAAKSPLLNSPT	Q08DG7	138	150	N-terminus	MMP14 (P50281; MMP14_HUMAN). Mmp14 (P53690; MMP14_MOUSE). Mmp14 (Q10739; MMP14_RAT)	NPTPASAA	MEROPS:M10.014	Endopeptidase (input)	-21.59	MEROPS score threshold (-22.96)	75	80.66		MMP14
PSAAPTESPDPAEDV	P52176	506	520	N-terminus	Mmp12 (P34960; MMP12_MOUSE). MMP12 (P39900; MMP12_HUMAN). Mmp12 (Q63341; MMP12_RAT)	PTAGPSAA	MEROPS:M10.009	Endopeptidase (input)	-18.35	MEROPS score threshold (-22.75)	67	88.47		Mmp12
PSAAPTESPDPAEDV	P52176	506	520	N-terminus	MMP14 (P50281; MMP14_HUMAN). Mmp14 (P53690; MMP14_MOUSE). Mmp14 (Q10739; MMP14_RAT)	PTAGPSAA	MEROPS:M10.014	Endopeptidase (input)	-22.75	MEROPS score threshold (-22.96)	75	80.66		MMP14
APGSSNTESTTSLGE	P98091	65	79	C-terminus	MMP14 (P50281; MMP14_HUMAN). Mmp14 (P53690; MMP14_MOUSE). Mmp14 (Q10739; MMP14_RAT)	SLGESRTR	MEROPS:M10.014	Endopeptidase (input)	-19.93	MEROPS score threshold (-22.96)	75	80.66		MMP14
VKGGYTLDANKGGGHQT	Q01107	784	800	C-terminus	Mmp13 (P23097; MMP13_RAT). Mmp13 (P33435; MMP13_MOUSE). MMP13 (P45452; MMP13_HUMAN)	GHQTLESV	MEROPS:M10.013	Endopeptidase (input)	-21.59	MEROPS score threshold (-23.33)	70	93.66		Mmp13
VKGGYTLDANKGGGHQT	Q01107	784	800	C-terminus	MMP14 (P50281; MMP14_HUMAN). Mmp14 (P53690; MMP14_MOUSE). Mmp14 (Q10739; MMP14_RAT)	GHQTLESV	MEROPS:M10.014	Endopeptidase (input)	-21.67	MEROPS score threshold (-22.96)	75	80.66		MMP14
DIGRVVIGLFG	P80311	56	66	C-terminus	Mmp12 (P34960; MMP12_MOUSE). MMP12 (P39900; MMP12_HUMAN). Mmp12 (Q63341; MMP12_RAT)	GLFGKTVP	MEROPS:M10.009	Endopeptidase (input)	-19.38	MEROPS score threshold (-22.75)	67	88.47		Mmp12
DIGRVVIGLFG	P80311	56	66	C-terminus	Mmp13 (P23097; MMP13_RAT). Mmp13 (P33435; MMP13_MOUSE). MMP13 (P45452; MMP13_HUMAN)	GLFGKTVP	MEROPS:M10.013	Endopeptidase (input)	-20.96	MEROPS score threshold (-23.33)	70	93.66		Mmp13
QTHTTPVLLAHGER	P56701	866	879	C-terminus	MMP14 (P50281; MMP14_HUMAN). Mmp14 (P53690; MMP14_MOUSE). Mmp14 (Q10739; MMP14_RAT)	HGERAELA	MEROPS:M10.014	Endopeptidase (input)	-22.4	MEROPS score threshold (-22.96)	75	80.66		MMP14
RSGAEKGYLV	Q08DI8	408	417	N-terminus	Mmp12 (P34960; MMP12_MOUSE). MMP12 (P39900; MMP12_HUMAN). Mmp12 (Q63341; MMP12_RAT)	ILKPRSGA	MEROPS:M10.009	Endopeptidase (input)	-21.91	MEROPS score threshold (-22.75)	67	88.47		Mmp12
RSGAEKGYLV	Q08DI8	408	417	N-terminus	Mmp13 (P23097; MMP13_RAT). Mmp13 (P33435; MMP13_MOUSE). MMP13 (P45452; MMP13_HUMAN)	ILKPRSGA	MEROPS:M10.013	Endopeptidase (input)	-22.71	MEROPS score threshold (-23.33)	70	93.66		Mmp13
DDFVSGVPRA	P80746	267	276	C-terminus	Mmp12 (P34960; MMP12_MOUSE). MMP12 (P39900; MMP12_HUMAN). Mmp12 (Q63341; MMP12_RAT)	VPRAARTL	MEROPS:M10.009	Endopeptidase (input)	-19.63	MEROPS score threshold (-22.75)	67	88.47		Mmp12
DDFVSGVPRA	P80746	267	276	C-terminus	Mmp13 (P23097; MMP13_RAT). Mmp13 (P33435; MMP13_MOUSE). MMP13 (P45452; MMP13_HUMAN)	VPRAARTL	MEROPS:M10.013	Endopeptidase (input)	-19.34	MEROPS score threshold (-23.33)	70	93.66		Mmp13
DDFVSGVPRA	P80746	267	276	C-terminus	MMP14 (P50281; MMP14_HUMAN). Mmp14 (P53690; MMP14_MOUSE). Mmp14 (Q10739; MMP14_RAT)	VPRAARTL	MEROPS:M10.014	Endopeptidase (input)	-20.44	MEROPS score threshold (-22.96)	75	80.66		MMP14
DDFVSGVPRA	P80746	267	276	C-terminus	Mmp17 (Q9R0S3; MMP17_MOUSE). MMP17 (Q9ULZ9; MMP17_HUMAN)	VPRAARTL	MEROPS:M10.017	Endopeptidase (input)	-16.67	99th percentile (-17.12)	0	99.95		Mmp17
PLYNLGFGNNLNY	P56652	421	433	C-terminus	MMP14 (P50281; MMP14_HUMAN). Mmp14 (P53690; MMP14_MOUSE). Mmp14 (Q10739; MMP14_RAT)	NLNYNFLE	MEROPS:M10.014	Endopeptidase (input)	-22.94	MEROPS score threshold (-22.96)	75	80.66		MMP14
GGNGQQQQAMSFAILRIIR	Q05037	437	455	N-terminus	Mmp12 (P34960; MMP12_MOUSE). MMP12 (P39900; MMP12_HUMAN). Mmp12 (Q63341; MMP12_RAT)	QQQGGGNG	MEROPS:M10.009	Endopeptidase (input)	-22.16	MEROPS score threshold (-22.75)	67	88.47		Mmp12
GGNGQQQQAMSFAILRIIR	Q05037	437	455	N-terminus	MMP14 (P50281; MMP14_HUMAN). Mmp14 (P53690; MMP14_MOUSE). Mmp14 (Q10739; MMP14_RAT)	QQQGGGNG	MEROPS:M10.014	Endopeptidase (input)	-21.79	MEROPS score threshold (-22.96)	75	80.66		MMP14
GGNGQQQQAMSFAILRIIR	Q05037	437	455	C-terminus	MMP14 (P50281; MMP14_HUMAN). Mmp14 (P53690; MMP14_MOUSE). Mmp14 (Q10739; MMP14_RAT)	RIIRLVRV	MEROPS:M10.014	Endopeptidase (input)	-21.71	MEROPS score threshold (-22.96)	75	80.66		MMP14
LSDPQERAWYDNHREAL	Q0II91	56	72	C-terminus	Mmp12 (P34960; MMP12_MOUSE). MMP12 (P39900; MMP12_HUMAN). Mmp12 (Q63341; MMP12_RAT)	REALLKGG	MEROPS:M10.009	Endopeptidase (input)	-19.25	MEROPS score threshold (-22.75)	67	88.47		Mmp12
LSDPQERAWYDNHREAL	Q0II91	56	72	C-terminus	Mmp13 (P23097; MMP13_RAT). Mmp13 (P33435; MMP13_MOUSE). MMP13 (P45452; MMP13_HUMAN)	REALLKGG	MEROPS:M10.013	Endopeptidase (input)	-23.02	MEROPS score threshold (-23.33)	70	93.66		Mmp13
LSDPQERAWYDNHREAL	Q0II91	56	72	C-terminus	MMP14 (P50281; MMP14_HUMAN). Mmp14 (P53690; MMP14_MOUSE). Mmp14 (Q10739; MMP14_RAT)	REALLKGG	MEROPS:M10.014	Endopeptidase (input)	-21.62	MEROPS score threshold (-22.96)	75	80.66		MMP14
LGHGGLTAFSSSS	Q0III6	167	179	N-terminus	MMP14 (P50281; MMP14_HUMAN). Mmp14 (P53690; MMP14_MOUSE). Mmp14 (Q10739; MMP14_RAT)	SFGSLGHG	MEROPS:M10.014	Endopeptidase (input)	-22.04	MEROPS score threshold (-22.96)	75	80.66		MMP14
LGHGGLTAFSSSS	Q0III6	167	179	C-terminus	Mmp12 (P34960; MMP12_MOUSE). MMP12 (P39900; MMP12_HUMAN). Mmp12 (Q63341; MMP12_RAT)	SSSSAFGG	MEROPS:M10.009	Endopeptidase (input)	-22.58	MEROPS score threshold (-22.75)	67	88.47		Mmp12
LGHGGLTAFSSSS	Q0III6	167	179	C-terminus	Mmp13 (P23097; MMP13_RAT). Mmp13 (P33435; MMP13_MOUSE). MMP13 (P45452; MMP13_HUMAN)	SSSSAFGG	MEROPS:M10.013	Endopeptidase (input)	-22.3	MEROPS score threshold (-23.33)	70	93.66		Mmp13
LGHGGLTAFSSSS	Q0III6	167	179	C-terminus	MMP14 (P50281; MMP14_HUMAN). Mmp14 (P53690; MMP14_MOUSE). Mmp14 (Q10739; MMP14_RAT)	SSSSAFGG	MEROPS:M10.014	Endopeptidase (input)	-21.38	MEROPS score threshold (-22.96)	75	80.66		MMP14
SRRAATDLLTALTGRTPGL	Q08DG4	85	103	N-terminus	MMP14 (P50281; MMP14_HUMAN). Mmp14 (P53690; MMP14_MOUSE). Mmp14 (Q10739; MMP14_RAT)	SRKSSRRA	MEROPS:M10.014	Endopeptidase (input)	-22.3	MEROPS score threshold (-22.96)	75	80.66		MMP14
MASNNTASIAQA	P63212	1	12	C-terminus	Mmp12 (P34960; MMP12_MOUSE). MMP12 (P39900; MMP12_HUMAN). Mmp12 (Q63341; MMP12_RAT)	IAQARKLV	MEROPS:M10.009	Endopeptidase (input)	-22.17	MEROPS score threshold (-22.75)	67	88.47		Mmp12
MASNNTASIAQA	P63212	1	12	C-terminus	MMP14 (P50281; MMP14_HUMAN). Mmp14 (P53690; MMP14_MOUSE). Mmp14 (Q10739; MMP14_RAT)	IAQARKLV	MEROPS:M10.014	Endopeptidase (input)	-22.61	MEROPS score threshold (-22.96)	75	80.66		MMP14
LLAGLGHEER	P79114	266	275	N-terminus	Mmp12 (P34960; MMP12_MOUSE). MMP12 (P39900; MMP12_HUMAN). Mmp12 (Q63341; MMP12_RAT)	IFYALLAG	MEROPS:M10.009	Endopeptidase (input)	-22.69	MEROPS score threshold (-22.75)	67	88.47		Mmp12
LLAGLGHEER	P79114	266	275	N-terminus	MMP14 (P50281; MMP14_HUMAN). Mmp14 (P53690; MMP14_MOUSE). Mmp14 (Q10739; MMP14_RAT)	IFYALLAG	MEROPS:M10.014	Endopeptidase (input)	-22.59	MEROPS score threshold (-22.96)	75	80.66		MMP14
PAPSPLVGFSQFPQQL	Q08E02	259	274	N-terminus	Mmp12 (P34960; MMP12_MOUSE). MMP12 (P39900; MMP12_HUMAN). Mmp12 (Q63341; MMP12_RAT)	PPPAPAPS	MEROPS:M10.009	Endopeptidase (input)	-20.15	MEROPS score threshold (-22.75)	67	88.47		Mmp12
FGLRSLLANEEGWPILLGL	P58353	180	198	N-terminus	Mmp12 (P34960; MMP12_MOUSE). MMP12 (P39900; MMP12_HUMAN). Mmp12 (Q63341; MMP12_RAT)	VAQIFGLR	MEROPS:M10.009	Endopeptidase (input)	-22.66	MEROPS score threshold (-22.75)	67	88.47		Mmp12
FGLRSLLANEEGWPILLGL	P58353	180	198	C-terminus	Mmp12 (P34960; MMP12_MOUSE). MMP12 (P39900; MMP12_HUMAN). Mmp12 (Q63341; MMP12_RAT)	LLGLTGIP	MEROPS:M10.009	Endopeptidase (input)	-22.12	MEROPS score threshold (-22.75)	67	88.47		Mmp12
TRAAGTTAPVVTPAAD	P55203	160	175	N-terminus	MMP14 (P50281; MMP14_HUMAN). Mmp14 (P53690; MMP14_MOUSE). Mmp14 (Q10739; MMP14_RAT)	GCPGTRAA	MEROPS:M10.014	Endopeptidase (input)	-22.28	MEROPS score threshold (-22.96)	75	80.66		MMP14
TRAAGTTAPVVTPAAD	P55203	160	175	C-terminus	Mmp12 (P34960; MMP12_MOUSE). MMP12 (P39900; MMP12_HUMAN). Mmp12 (Q63341; MMP12_RAT)	PAADALYA	MEROPS:M10.009	Endopeptidase (input)	-20.6	MEROPS score threshold (-22.75)	67	88.47		Mmp12
KEEPPSPPQSPRAEGA	Q08DJ8	298	313	C-terminus	Mmp12 (P34960; MMP12_MOUSE). MMP12 (P39900; MMP12_HUMAN). Mmp12 (Q63341; MMP12_RAT)	AEGASPGR	MEROPS:M10.009	Endopeptidase (input)	-21.46	MEROPS score threshold (-22.75)	67	88.47		Mmp12
KEEPPSPPQSPRAEGA	Q08DJ8	298	313	C-terminus	MMP14 (P50281; MMP14_HUMAN). Mmp14 (P53690; MMP14_MOUSE). Mmp14 (Q10739; MMP14_RAT)	AEGASPGR	MEROPS:M10.014	Endopeptidase (input)	-22.07	MEROPS score threshold (-22.96)	75	80.66		MMP14
PEEEPEYHAEAAAQE	Q0III0	126	140	N-terminus	MMP14 (P50281; MMP14_HUMAN). Mmp14 (P53690; MMP14_MOUSE). Mmp14 (Q10739; MMP14_RAT)	LQSPPEEE	MEROPS:M10.014	Endopeptidase (input)	-22.58	MEROPS score threshold (-22.96)	75	80.66		MMP14
PEEEPEYHAEAAAQE	Q0III0	126	140	C-terminus	Mmp12 (P34960; MMP12_MOUSE). MMP12 (P39900; MMP12_HUMAN). Mmp12 (Q63341; MMP12_RAT)	AAQESFAV	MEROPS:M10.009	Endopeptidase (input)	-21	MEROPS score threshold (-22.75)	67	88.47		Mmp12
PEEEPEYHAEAAAQE	Q0III0	126	140	C-terminus	Mmp13 (P23097; MMP13_RAT). Mmp13 (P33435; MMP13_MOUSE). MMP13 (P45452; MMP13_HUMAN)	AAQESFAV	MEROPS:M10.013	Endopeptidase (input)	-21.75	MEROPS score threshold (-23.33)	70	93.66		Mmp13
PEEEPEYHAEAAAQE	Q0III0	126	140	C-terminus	MMP14 (P50281; MMP14_HUMAN). Mmp14 (P53690; MMP14_MOUSE). Mmp14 (Q10739; MMP14_RAT)	AAQESFAV	MEROPS:M10.014	Endopeptidase (input)	-21.69	MEROPS score threshold (-22.96)	75	80.66		MMP14
GTGGILGYLFGS	Q08E24	264	275	C-terminus	MMP14 (P50281; MMP14_HUMAN). Mmp14 (P53690; MMP14_MOUSE). Mmp14 (Q10739; MMP14_RAT)	LFGSNRAA	MEROPS:M10.014	Endopeptidase (input)	-21.07	MEROPS score threshold (-22.96)	75	80.66		MMP14
GYSTAAPAYGLPKR	Q08E27	639	652	C-terminus	Mmp13 (P23097; MMP13_RAT). Mmp13 (P33435; MMP13_MOUSE). MMP13 (P45452; MMP13_HUMAN)	LPKRMVLL	MEROPS:M10.013	Endopeptidase (input)	-20.46	MEROPS score threshold (-23.33)	70	93.66		Mmp13
GYSTAAPAYGLPKR	Q08E27	639	652	C-terminus	MMP14 (P50281; MMP14_HUMAN). Mmp14 (P53690; MMP14_MOUSE). Mmp14 (Q10739; MMP14_RAT)	LPKRMVLL	MEROPS:M10.014	Endopeptidase (input)	-19.29	MEROPS score threshold (-22.96)	75	80.66		MMP14
YKLLSQSGPVHAP	Q08E27	404	416	N-terminus	Mmp12 (P34960; MMP12_MOUSE). MMP12 (P39900; MMP12_HUMAN). Mmp12 (Q63341; MMP12_RAT)	PGLQYKLL	MEROPS:M10.009	Endopeptidase (input)	-21.33	MEROPS score threshold (-22.75)	67	88.47		Mmp12
YKLLSQSGPVHAP	Q08E27	404	416	N-terminus	MMP14 (P50281; MMP14_HUMAN). Mmp14 (P53690; MMP14_MOUSE). Mmp14 (Q10739; MMP14_RAT)	PGLQYKLL	MEROPS:M10.014	Endopeptidase (input)	-22.17	MEROPS score threshold (-22.96)	75	80.66		MMP14
PEAEAIVTAASETK	P81282	2939	2952	C-terminus	Mmp12 (P34960; MMP12_MOUSE). MMP12 (P39900; MMP12_HUMAN). Mmp12 (Q63341; MMP12_RAT)	SETKLEGA	MEROPS:M10.009	Endopeptidase (input)	-22.14	MEROPS score threshold (-22.75)	67	88.47		Mmp12
PEAEAIVTAASETK	P81282	2939	2952	C-terminus	MMP14 (P50281; MMP14_HUMAN). Mmp14 (P53690; MMP14_MOUSE). Mmp14 (Q10739; MMP14_RAT)	SETKLEGA	MEROPS:M10.014	Endopeptidase (input)	-21.29	MEROPS score threshold (-22.96)	75	80.66		MMP14
VQSLEASILNDTSGDYE	P81282	2281	2297	N-terminus	MMP14 (P50281; MMP14_HUMAN). Mmp14 (P53690; MMP14_MOUSE). Mmp14 (Q10739; MMP14_RAT)	LTSQVQSL	MEROPS:M10.014	Endopeptidase (input)	-21.94	MEROPS score threshold (-22.96)	75	80.66		MMP14
LTSDHKSKVKEIVAQHT	Q07722	853	869	N-terminus	MMP14 (P50281; MMP14_HUMAN). Mmp14 (P53690; MMP14_MOUSE). Mmp14 (Q10739; MMP14_RAT)	KIQTLTSD	MEROPS:M10.014	Endopeptidase (input)	-22.55	MEROPS score threshold (-22.96)	75	80.66		MMP14
DFLSCMSRRSGLPRW	Q0VCT2	261	275	N-terminus	MMP14 (P50281; MMP14_HUMAN). Mmp14 (P53690; MMP14_MOUSE). Mmp14 (Q10739; MMP14_RAT)	LQDNDFLS	MEROPS:M10.014	Endopeptidase (input)	-22.85	MEROPS score threshold (-22.96)	75	80.66		MMP14
MTCLIHVLEAWFGVEH	Q0VCR6	18	33	C-terminus	MMP14 (P50281; MMP14_HUMAN). Mmp14 (P53690; MMP14_MOUSE). Mmp14 (Q10739; MMP14_RAT)	GVEHLEDY	MEROPS:M10.014	Endopeptidase (input)	-21.25	MEROPS score threshold (-22.96)	75	80.66		MMP14
AFALPEGLSAPARC	Q0VCE3	277	290	N-terminus	Mmp13 (P23097; MMP13_RAT). Mmp13 (P33435; MMP13_MOUSE). MMP13 (P45452; MMP13_HUMAN)	IRRGAFAL	MEROPS:M10.013	Endopeptidase (input)	-22.24	MEROPS score threshold (-23.33)	70	93.66		Mmp13
VEVEFGGGAELL	Q148F0	7	18	N-terminus	Mmp12 (P34960; MMP12_MOUSE). MMP12 (P39900; MMP12_HUMAN). Mmp12 (Q63341; MMP12_RAT)	APLSVEVE	MEROPS:M10.009	Endopeptidase (input)	-21.97	MEROPS score threshold (-22.75)	67	88.47		Mmp12
VEVEFGGGAELL	Q148F0	7	18	N-terminus	Mmp13 (P23097; MMP13_RAT). Mmp13 (P33435; MMP13_MOUSE). MMP13 (P45452; MMP13_HUMAN)	APLSVEVE	MEROPS:M10.013	Endopeptidase (input)	-19.94	MEROPS score threshold (-23.33)	70	93.66		Mmp13
VEVEFGGGAELL	Q148F0	7	18	N-terminus	MMP14 (P50281; MMP14_HUMAN). Mmp14 (P53690; MMP14_MOUSE). Mmp14 (Q10739; MMP14_RAT)	APLSVEVE	MEROPS:M10.014	Endopeptidase (input)	-20.11	MEROPS score threshold (-22.96)	75	80.66		MMP14
PAPGLPGAGGPVVPGPG	Q0P5L0	6	22	N-terminus	Mmp12 (P34960; MMP12_MOUSE). MMP12 (P39900; MMP12_HUMAN). Mmp12 (Q63341; MMP12_RAT)	AGAGPAPG	MEROPS:M10.009	Endopeptidase (input)	-17.07	MEROPS score threshold (-22.75)	67	88.47		Mmp12
PAPGLPGAGGPVVPGPG	Q0P5L0	6	22	C-terminus	Mmp12 (P34960; MMP12_MOUSE). MMP12 (P39900; MMP12_HUMAN). Mmp12 (Q63341; MMP12_RAT)	PGPGAGIP	MEROPS:M10.009	Endopeptidase (input)	-18.58	MEROPS score threshold (-22.75)	67	88.47		Mmp12
ASAVVAVGAGGAPAGPA	Q0P5L0	230	246	N-terminus	Mmp12 (P34960; MMP12_MOUSE). MMP12 (P39900; MMP12_HUMAN). Mmp12 (Q63341; MMP12_RAT)	GLEEASAV	MEROPS:M10.009	Endopeptidase (input)	-18.5	MEROPS score threshold (-22.75)	67	88.47		Mmp12
ASAVVAVGAGGAPAGPA	Q0P5L0	230	246	N-terminus	Mmp13 (P23097; MMP13_RAT). Mmp13 (P33435; MMP13_MOUSE). MMP13 (P45452; MMP13_HUMAN)	GLEEASAV	MEROPS:M10.013	Endopeptidase (input)	-21.3	MEROPS score threshold (-23.33)	70	93.66		Mmp13
ASAVVAVGAGGAPAGPA	Q0P5L0	230	246	N-terminus	MMP14 (P50281; MMP14_HUMAN). Mmp14 (P53690; MMP14_MOUSE). Mmp14 (Q10739; MMP14_RAT)	GLEEASAV	MEROPS:M10.014	Endopeptidase (input)	-22.17	MEROPS score threshold (-22.96)	75	80.66		MMP14
ASAVVAVGAGGAPAGPA	Q0P5L0	230	246	C-terminus	Mmp12 (P34960; MMP12_MOUSE). MMP12 (P39900; MMP12_HUMAN). Mmp12 (Q63341; MMP12_RAT)	AGPAVIGP	MEROPS:M10.009	Endopeptidase (input)	-17.79	MEROPS score threshold (-22.75)	67	88.47		Mmp12
ASAVVAVGAGGAPAGPA	Q0P5L0	230	246	C-terminus	Mmp13 (P23097; MMP13_RAT). Mmp13 (P33435; MMP13_MOUSE). MMP13 (P45452; MMP13_HUMAN)	AGPAVIGP	MEROPS:M10.013	Endopeptidase (input)	-19.98	MEROPS score threshold (-23.33)	70	93.66		Mmp13
DALGMDPMMEHEMGGHHPG	Q0VCX4	727	745	N-terminus	MMP14 (P50281; MMP14_HUMAN). Mmp14 (P53690; MMP14_MOUSE). Mmp14 (Q10739; MMP14_RAT)	GYGQDALG	MEROPS:M10.014	Endopeptidase (input)	-22.6	MEROPS score threshold (-22.96)	75	80.66		MMP14
DALGMDPMMEHEMGGHHPG	Q0VCX4	727	745	C-terminus	Mmp13 (P23097; MMP13_RAT). Mmp13 (P33435; MMP13_MOUSE). MMP13 (P45452; MMP13_HUMAN)	HHPGADYP	MEROPS:M10.013	Endopeptidase (input)	-22.58	MEROPS score threshold (-23.33)	70	93.66		Mmp13
KRASAKAGPHRTVPQR	Q17QP0	93	108	C-terminus	Mmp12 (P34960; MMP12_MOUSE). MMP12 (P39900; MMP12_HUMAN). Mmp12 (Q63341; MMP12_RAT)	VPQRAAGR	MEROPS:M10.009	Endopeptidase (input)	-18.79	MEROPS score threshold (-22.75)	67	88.47		Mmp12
KRASAKAGPHRTVPQR	Q17QP0	93	108	C-terminus	Mmp13 (P23097; MMP13_RAT). Mmp13 (P33435; MMP13_MOUSE). MMP13 (P45452; MMP13_HUMAN)	VPQRAAGR	MEROPS:M10.013	Endopeptidase (input)	-19.83	MEROPS score threshold (-23.33)	70	93.66		Mmp13
KRASAKAGPHRTVPQR	Q17QP0	93	108	C-terminus	MMP14 (P50281; MMP14_HUMAN). Mmp14 (P53690; MMP14_MOUSE). Mmp14 (Q10739; MMP14_RAT)	VPQRAAGR	MEROPS:M10.014	Endopeptidase (input)	-19.93	MEROPS score threshold (-22.96)	75	80.66		MMP14
FHSFYQLLQGGSDQML	Q17R14	201	216	N-terminus	Mmp13 (P23097; MMP13_RAT). Mmp13 (P33435; MMP13_MOUSE). MMP13 (P45452; MMP13_HUMAN)	GERSFHSF	MEROPS:M10.013	Endopeptidase (input)	-22.8	MEROPS score threshold (-23.33)	70	93.66		Mmp13
RLRELGPDGEEAEGPGAGD	Q0V898	142	160	N-terminus	MMP14 (P50281; MMP14_HUMAN). Mmp14 (P53690; MMP14_MOUSE). Mmp14 (Q10739; MMP14_RAT)	SSSDRLRE	MEROPS:M10.014	Endopeptidase (input)	-22.14	MEROPS score threshold (-22.96)	75	80.66		MMP14
RLRELGPDGEEAEGPGAGD	Q0V898	142	160	C-terminus	MMP14 (P50281; MMP14_HUMAN). Mmp14 (P53690; MMP14_MOUSE). Mmp14 (Q10739; MMP14_RAT)	GAGDGPPR	MEROPS:M10.014	Endopeptidase (input)	-22.26	MEROPS score threshold (-22.96)	75	80.66		MMP14
LGTLLFIAIPIAAGVVIK	Q0V8N6	324	341	N-terminus	Mmp12 (P34960; MMP12_MOUSE). MMP12 (P39900; MMP12_HUMAN). Mmp12 (Q63341; MMP12_RAT)	VSKILGTL	MEROPS:M10.009	Endopeptidase (input)	-22.22	MEROPS score threshold (-22.75)	67	88.47		Mmp12
LGTLLFIAIPIAAGVVIK	Q0V8N6	324	341	C-terminus	MMP14 (P50281; MMP14_HUMAN). Mmp14 (P53690; MMP14_MOUSE). Mmp14 (Q10739; MMP14_RAT)	VVIKSKLP	MEROPS:M10.014	Endopeptidase (input)	-22.15	MEROPS score threshold (-22.96)	75	80.66		MMP14
WVLALVFGLSLVYF	Q17QN8	17	30	C-terminus	MMP14 (P50281; MMP14_HUMAN). Mmp14 (P53690; MMP14_MOUSE). Mmp14 (Q10739; MMP14_RAT)	LVYFLTST	MEROPS:M10.014	Endopeptidase (input)	-22.92	MEROPS score threshold (-22.96)	75	80.66		MMP14
METLSYSYC	Q0VCY6	150	158	N-terminus	MMP14 (P50281; MMP14_HUMAN). Mmp14 (P53690; MMP14_MOUSE). Mmp14 (Q10739; MMP14_RAT)	VPSLMETL	MEROPS:M10.014	Endopeptidase (input)	-21.06	MEROPS score threshold (-22.96)	75	80.66		MMP14
MGCDGGTIPKRHELVKG	Q0VCR1	1	17	C-terminus	Mmp12 (P34960; MMP12_MOUSE). MMP12 (P39900; MMP12_HUMAN). Mmp12 (Q63341; MMP12_RAT)	LVKGPKKV	MEROPS:M10.009	Endopeptidase (input)	-21.22	MEROPS score threshold (-22.75)	67	88.47		Mmp12
SGPPDSLSDHFTLSFWM	Q0VCN6	364	380	N-terminus	Mmp12 (P34960; MMP12_MOUSE). MMP12 (P39900; MMP12_HUMAN). Mmp12 (Q63341; MMP12_RAT)	AGLGSGPP	MEROPS:M10.009	Endopeptidase (input)	-18.83	MEROPS score threshold (-22.75)	67	88.47		Mmp12
SGPPDSLSDHFTLSFWM	Q0VCN6	364	380	N-terminus	MMP14 (P50281; MMP14_HUMAN). Mmp14 (P53690; MMP14_MOUSE). Mmp14 (Q10739; MMP14_RAT)	AGLGSGPP	MEROPS:M10.014	Endopeptidase (input)	-22.65	MEROPS score threshold (-22.96)	75	80.66		MMP14
EWLKMSYPAKVT	Q0VC58	175	186	C-terminus	MMP14 (P50281; MMP14_HUMAN). Mmp14 (P53690; MMP14_MOUSE). Mmp14 (Q10739; MMP14_RAT)	AKVTLLGS	MEROPS:M10.014	Endopeptidase (input)	-22.81	MEROPS score threshold (-22.96)	75	80.66		MMP14
DDLFAAYFGPGSPSR	Q0V8J4	85	99	N-terminus	MMP14 (P50281; MMP14_HUMAN). Mmp14 (P53690; MMP14_MOUSE). Mmp14 (Q10739; MMP14_RAT)	TLLADDLF	MEROPS:M10.014	Endopeptidase (input)	-22.38	MEROPS score threshold (-22.96)	75	80.66		MMP14
DDLFAAYFGPGSPSR	Q0V8J4	85	99	C-terminus	MMP14 (P50281; MMP14_HUMAN). Mmp14 (P53690; MMP14_MOUSE). Mmp14 (Q10739; MMP14_RAT)	SPSRRFRA	MEROPS:M10.014	Endopeptidase (input)	-20.62	MEROPS score threshold (-22.96)	75	80.66		MMP14
RRHTVGGGEMAKAPP	Q0VBZ8	360	374	N-terminus	Mmp13 (P23097; MMP13_RAT). Mmp13 (P33435; MMP13_MOUSE). MMP13 (P45452; MMP13_HUMAN)	RPRPRRHT	MEROPS:M10.013	Endopeptidase (input)	-22.76	MEROPS score threshold (-23.33)	70	93.66		Mmp13
RRHTVGGGEMAKAPP	Q0VBZ8	360	374	N-terminus	MMP14 (P50281; MMP14_HUMAN). Mmp14 (P53690; MMP14_MOUSE). Mmp14 (Q10739; MMP14_RAT)	RPRPRRHT	MEROPS:M10.014	Endopeptidase (input)	-22.14	MEROPS score threshold (-22.96)	75	80.66		MMP14
PSEEFSKHAAATAAASP	Q0V8E4	382	398	C-terminus	MMP14 (P50281; MMP14_HUMAN). Mmp14 (P53690; MMP14_MOUSE). Mmp14 (Q10739; MMP14_RAT)	AASPGEQL	MEROPS:M10.014	Endopeptidase (input)	-21.04	MEROPS score threshold (-22.96)	75	80.66		MMP14
PPHLPGPPPG	Q0P5D2	340	349	C-terminus	Mmp12 (P34960; MMP12_MOUSE). MMP12 (P39900; MMP12_HUMAN). Mmp12 (Q63341; MMP12_RAT)	PPPGAPPP	MEROPS:M10.009	Endopeptidase (input)	-19.46	MEROPS score threshold (-22.75)	67	88.47		Mmp12
PPHLPGPPPG	Q0P5D2	340	349	C-terminus	Mmp13 (P23097; MMP13_RAT). Mmp13 (P33435; MMP13_MOUSE). MMP13 (P45452; MMP13_HUMAN)	PPPGAPPP	MEROPS:M10.013	Endopeptidase (input)	-19.85	MEROPS score threshold (-23.33)	70	93.66		Mmp13
PPHLPGPPPG	Q0P5D2	340	349	C-terminus	MMP14 (P50281; MMP14_HUMAN). Mmp14 (P53690; MMP14_MOUSE). Mmp14 (Q10739; MMP14_RAT)	PPPGAPPP	MEROPS:M10.014	Endopeptidase (input)	-22.55	MEROPS score threshold (-22.96)	75	80.66		MMP14
REAEQLRFLFRKLASG	Q0V8C2	632	647	C-terminus	Mmp12 (P34960; MMP12_MOUSE). MMP12 (P39900; MMP12_HUMAN). Mmp12 (Q63341; MMP12_RAT)	LASGFGEE	MEROPS:M10.009	Endopeptidase (input)	-20.47	MEROPS score threshold (-22.75)	67	88.47		Mmp12
REAEQLRFLFRKLASG	Q0V8C2	632	647	C-terminus	Mmp13 (P23097; MMP13_RAT). Mmp13 (P33435; MMP13_MOUSE). MMP13 (P45452; MMP13_HUMAN)	LASGFGEE	MEROPS:M10.013	Endopeptidase (input)	-21.57	MEROPS score threshold (-23.33)	70	93.66		Mmp13
REAEQLRFLFRKLASG	Q0V8C2	632	647	C-terminus	MMP14 (P50281; MMP14_HUMAN). Mmp14 (P53690; MMP14_MOUSE). Mmp14 (Q10739; MMP14_RAT)	LASGFGEE	MEROPS:M10.014	Endopeptidase (input)	-20.41	MEROPS score threshold (-22.96)	75	80.66		MMP14
VERGAPALLT	Q148M6	192	201	N-terminus	Mmp12 (P34960; MMP12_MOUSE). MMP12 (P39900; MMP12_HUMAN). Mmp12 (Q63341; MMP12_RAT)	EVLAVERG	MEROPS:M10.009	Endopeptidase (input)	-21.86	MEROPS score threshold (-22.75)	67	88.47		Mmp12
VERGAPALLT	Q148M6	192	201	N-terminus	MMP14 (P50281; MMP14_HUMAN). Mmp14 (P53690; MMP14_MOUSE). Mmp14 (Q10739; MMP14_RAT)	EVLAVERG	MEROPS:M10.014	Endopeptidase (input)	-20.67	MEROPS score threshold (-22.96)	75	80.66		MMP14
AIGPWLSAAAVIHEPKP	Q0VCZ0	149	165	N-terminus	Mmp12 (P34960; MMP12_MOUSE). MMP12 (P39900; MMP12_HUMAN). Mmp12 (Q63341; MMP12_RAT)	STARAIGP	MEROPS:M10.009	Endopeptidase (input)	-21.82	MEROPS score threshold (-22.75)	67	88.47		Mmp12
AIGPWLSAAAVIHEPKP	Q0VCZ0	149	165	C-terminus	Mmp12 (P34960; MMP12_MOUSE). MMP12 (P39900; MMP12_HUMAN). Mmp12 (Q63341; MMP12_RAT)	EPKPPKTQ	MEROPS:M10.009	Endopeptidase (input)	-22.72	MEROPS score threshold (-22.75)	67	88.47		Mmp12
PTRGGDAEAAEAEHTVS	Q17QE3	136	152	N-terminus	Mmp12 (P34960; MMP12_MOUSE). MMP12 (P39900; MMP12_HUMAN). Mmp12 (Q63341; MMP12_RAT)	GLAHPTRG	MEROPS:M10.009	Endopeptidase (input)	-21.15	MEROPS score threshold (-22.75)	67	88.47		Mmp12
LTGPLNLNDPEAKCR	Q0VD30	281	295	N-terminus	Mmp12 (P34960; MMP12_MOUSE). MMP12 (P39900; MMP12_HUMAN). Mmp12 (Q63341; MMP12_RAT)	YGRFLTGP	MEROPS:M10.009	Endopeptidase (input)	-22.25	MEROPS score threshold (-22.75)	67	88.47		Mmp12
PVASQGGSLPAS	Q0VCT9	102	113	C-terminus	Mmp12 (P34960; MMP12_MOUSE). MMP12 (P39900; MMP12_HUMAN). Mmp12 (Q63341; MMP12_RAT)	LPASMQLQ	MEROPS:M10.009	Endopeptidase (input)	-22.58	MEROPS score threshold (-22.75)	67	88.47		Mmp12
PVASQGGSLPAS	Q0VCT9	102	113	C-terminus	Mmp13 (P23097; MMP13_RAT). Mmp13 (P33435; MMP13_MOUSE). MMP13 (P45452; MMP13_HUMAN)	LPASMQLQ	MEROPS:M10.013	Endopeptidase (input)	-20.3	MEROPS score threshold (-23.33)	70	93.66		Mmp13
PVASQGGSLPAS	Q0VCT9	102	113	C-terminus	MMP14 (P50281; MMP14_HUMAN). Mmp14 (P53690; MMP14_MOUSE). Mmp14 (Q10739; MMP14_RAT)	LPASMQLQ	MEROPS:M10.014	Endopeptidase (input)	-18.43	MEROPS score threshold (-22.96)	75	80.66		MMP14
KAWLWMDGTPYS	Q0VCS6	207	218	C-terminus	MMP14 (P50281; MMP14_HUMAN). Mmp14 (P53690; MMP14_MOUSE). Mmp14 (Q10739; MMP14_RAT)	TPYSSELF	MEROPS:M10.014	Endopeptidase (input)	-21.39	MEROPS score threshold (-22.96)	75	80.66		MMP14
GSSVASAPVSSFPRTS	Q0VD59	54	69	N-terminus	Mmp12 (P34960; MMP12_MOUSE). MMP12 (P39900; MMP12_HUMAN). Mmp12 (Q63341; MMP12_RAT)	SKAGGSSV	MEROPS:M10.009	Endopeptidase (input)	-22.66	MEROPS score threshold (-22.75)	67	88.47		Mmp12
GSSVASAPVSSFPRTS	Q0VD59	54	69	N-terminus	MMP14 (P50281; MMP14_HUMAN). Mmp14 (P53690; MMP14_MOUSE). Mmp14 (Q10739; MMP14_RAT)	SKAGGSSV	MEROPS:M10.014	Endopeptidase (input)	-21.63	MEROPS score threshold (-22.96)	75	80.66		MMP14
VFVRRSPLVLVAVARTR	Q17QV2	210	226	C-terminus	MMP14 (P50281; MMP14_HUMAN). Mmp14 (P53690; MMP14_MOUSE). Mmp14 (Q10739; MMP14_RAT)	ARTRQSAQ	MEROPS:M10.014	Endopeptidase (input)	-22.95	MEROPS score threshold (-22.96)	75	80.66		MMP14
TQLTGVARDLQEEML	Q17QV2	99	113	N-terminus	MMP14 (P50281; MMP14_HUMAN). Mmp14 (P53690; MMP14_MOUSE). Mmp14 (Q10739; MMP14_RAT)	SELSTQLT	MEROPS:M10.014	Endopeptidase (input)	-22.86	MEROPS score threshold (-22.96)	75	80.66		MMP14
SPKRVAPDSHQLIKALA	Q1JPD6	138	154	N-terminus	MMP14 (P50281; MMP14_HUMAN). Mmp14 (P53690; MMP14_MOUSE). Mmp14 (Q10739; MMP14_RAT)	PASRSPKR	MEROPS:M10.014	Endopeptidase (input)	-21.5	MEROPS score threshold (-22.96)	75	80.66		MMP14
SPKRVAPDSHQLIKALA	Q1JPD6	138	154	C-terminus	Mmp12 (P34960; MMP12_MOUSE). MMP12 (P39900; MMP12_HUMAN). Mmp12 (Q63341; MMP12_RAT)	KALAEAPD	MEROPS:M10.009	Endopeptidase (input)	-21.75	MEROPS score threshold (-22.75)	67	88.47		Mmp12
QMFGGFGFVTFENSAD	Q17QD3	134	149	C-terminus	MMP14 (P50281; MMP14_HUMAN). Mmp14 (P53690; MMP14_MOUSE). Mmp14 (Q10739; MMP14_RAT)	NSADADRA	MEROPS:M10.014	Endopeptidase (input)	-22.58	MEROPS score threshold (-22.96)	75	80.66		MMP14
SISPDCSMLCSAA	Q0V8J1	206	218	C-terminus	MMP14 (P50281; MMP14_HUMAN). Mmp14 (P53690; MMP14_MOUSE). Mmp14 (Q10739; MMP14_RAT)	CSAAGEKS	MEROPS:M10.014	Endopeptidase (input)	-22	MEROPS score threshold (-22.96)	75	80.66		MMP14
MSFYVRPSPAKRR	Q0VCT3	29	41	N-terminus	MMP14 (P50281; MMP14_HUMAN). Mmp14 (P53690; MMP14_MOUSE). Mmp14 (Q10739; MMP14_RAT)	DGSSMSFY	MEROPS:M10.014	Endopeptidase (input)	-22.17	MEROPS score threshold (-22.96)	75	80.66		MMP14
MSFYVRPSPAKRR	Q0VCT3	29	41	C-terminus	MMP14 (P50281; MMP14_HUMAN). Mmp14 (P53690; MMP14_MOUSE). Mmp14 (Q10739; MMP14_RAT)	AKRRLSTL	MEROPS:M10.014	Endopeptidase (input)	-20.91	MEROPS score threshold (-22.96)	75	80.66		MMP14
ALLTSVVFVGMMS	Q1JP63	123	135	C-terminus	MMP14 (P50281; MMP14_HUMAN). Mmp14 (P53690; MMP14_MOUSE). Mmp14 (Q10739; MMP14_RAT)	GMMSSSTL	MEROPS:M10.014	Endopeptidase (input)	-22.76	MEROPS score threshold (-22.96)	75	80.66		MMP14
GTKAGVEAAGTGCCMC	Q1JQA4	276	291	N-terminus	Mmp12 (P34960; MMP12_MOUSE). MMP12 (P39900; MMP12_HUMAN). Mmp12 (Q63341; MMP12_RAT)	LLGPGTKA	MEROPS:M10.009	Endopeptidase (input)	-20.93	MEROPS score threshold (-22.75)	67	88.47		Mmp12
GTKAGVEAAGTGCCMC	Q1JQA4	276	291	N-terminus	MMP14 (P50281; MMP14_HUMAN). Mmp14 (P53690; MMP14_MOUSE). Mmp14 (Q10739; MMP14_RAT)	LLGPGTKA	MEROPS:M10.014	Endopeptidase (input)	-21.05	MEROPS score threshold (-22.96)	75	80.66		MMP14
QLLTPSSQPAAGVPGRAA	Q1LZD3	120	137	C-terminus	Mmp12 (P34960; MMP12_MOUSE). MMP12 (P39900; MMP12_HUMAN). Mmp12 (Q63341; MMP12_RAT)	GRAAGSPA	MEROPS:M10.009	Endopeptidase (input)	-20.59	MEROPS score threshold (-22.75)	67	88.47		Mmp12
QLLTPSSQPAAGVPGRAA	Q1LZD3	120	137	C-terminus	MMP14 (P50281; MMP14_HUMAN). Mmp14 (P53690; MMP14_MOUSE). Mmp14 (Q10739; MMP14_RAT)	GRAAGSPA	MEROPS:M10.014	Endopeptidase (input)	-21.68	MEROPS score threshold (-22.96)	75	80.66		MMP14
ALALPGEPPVPAAPAGE	Q1LZD9	35	51	N-terminus	Mmp12 (P34960; MMP12_MOUSE). MMP12 (P39900; MMP12_HUMAN). Mmp12 (Q63341; MMP12_RAT)	PAALALAL	MEROPS:M10.009	Endopeptidase (input)	-18.83	MEROPS score threshold (-22.75)	67	88.47		Mmp12
ALALPGEPPVPAAPAGE	Q1LZD9	35	51	N-terminus	Mmp13 (P23097; MMP13_RAT). Mmp13 (P33435; MMP13_MOUSE). MMP13 (P45452; MMP13_HUMAN)	PAALALAL	MEROPS:M10.013	Endopeptidase (input)	-23.06	MEROPS score threshold (-23.33)	70	93.66		Mmp13
ALALPGEPPVPAAPAGE	Q1LZD9	35	51	N-terminus	MMP20 (O60882; MMP20_HUMAN). Mmp20 (P57748; MMP20_MOUSE)	PAALALAL	MEROPS:M10.019	Endopeptidase (input)	-16.8	99th percentile (-17.5)	33	99.92		MMP20
ALALPGEPPVPAAPAGE	Q1LZD9	35	51	C-terminus	Mmp12 (P34960; MMP12_MOUSE). MMP12 (P39900; MMP12_HUMAN). Mmp12 (Q63341; MMP12_RAT)	PAGEDRPA	MEROPS:M10.009	Endopeptidase (input)	-21.13	MEROPS score threshold (-22.75)	67	88.47		Mmp12
LHVYNMRSQDMNAYK	Q29RH0	56	70	C-terminus	Mmp12 (P34960; MMP12_MOUSE). MMP12 (P39900; MMP12_HUMAN). Mmp12 (Q63341; MMP12_RAT)	NAYKVVRV	MEROPS:M10.009	Endopeptidase (input)	-22.32	MEROPS score threshold (-22.75)	67	88.47		Mmp12
KGSKKGKETPSDSGSEK	Q28092	194	210	C-terminus	MMP14 (P50281; MMP14_HUMAN). Mmp14 (P53690; MMP14_MOUSE). Mmp14 (Q10739; MMP14_RAT)	GSEKGDAK	MEROPS:M10.014	Endopeptidase (input)	-21.88	MEROPS score threshold (-22.96)	75	80.66		MMP14
AAAAAAAGAAGGRGS	Q28165	5	19	N-terminus	Mmp12 (P34960; MMP12_MOUSE). MMP12 (P39900; MMP12_HUMAN). Mmp12 (Q63341; MMP12_RAT)	MAAAAAAA	MEROPS:M10.009	Endopeptidase (input)	-16.24	MEROPS score threshold (-22.75)	67	88.47		Mmp12
AAAAAAAGAAGGRGS	Q28165	5	19	N-terminus	MMP14 (P50281; MMP14_HUMAN). Mmp14 (P53690; MMP14_MOUSE). Mmp14 (Q10739; MMP14_RAT)	MAAAAAAA	MEROPS:M10.014	Endopeptidase (input)	-22.6	MEROPS score threshold (-22.96)	75	80.66		MMP14
AAAAAAAGAAGGRGS	Q28165	5	19	C-terminus	MMP14 (P50281; MMP14_HUMAN). Mmp14 (P53690; MMP14_MOUSE). Mmp14 (Q10739; MMP14_RAT)	GRGSGPGR	MEROPS:M10.014	Endopeptidase (input)	-21.73	MEROPS score threshold (-22.96)	75	80.66		MMP14
NPSVVSPSSPPDDEMSSGS	Q29423	169	187	C-terminus	MMP14 (P50281; MMP14_HUMAN). Mmp14 (P53690; MMP14_MOUSE). Mmp14 (Q10739; MMP14_RAT)	SSGSPSER	MEROPS:M10.014	Endopeptidase (input)	-21.68	MEROPS score threshold (-22.96)	75	80.66		MMP14
LDTLGGPGERERAAM	Q1LZE8	315	329	C-terminus	Mmp12 (P34960; MMP12_MOUSE). MMP12 (P39900; MMP12_HUMAN). Mmp12 (Q63341; MMP12_RAT)	RAAMLIKR	MEROPS:M10.009	Endopeptidase (input)	-22.51	MEROPS score threshold (-22.75)	67	88.47		Mmp12
LDTLGGPGERERAAM	Q1LZE8	315	329	C-terminus	MMP14 (P50281; MMP14_HUMAN). Mmp14 (P53690; MMP14_MOUSE). Mmp14 (Q10739; MMP14_RAT)	RAAMLIKR	MEROPS:M10.014	Endopeptidase (input)	-21.6	MEROPS score threshold (-22.96)	75	80.66		MMP14
YGLSAEVKNKLAQKYDH	Q2HJ38	12	28	N-terminus	Mmp12 (P34960; MMP12_MOUSE). MMP12 (P39900; MMP12_HUMAN). Mmp12 (Q63341; MMP12_RAT)	RGPAYGLS	MEROPS:M10.009	Endopeptidase (input)	-20	MEROPS score threshold (-22.75)	67	88.47		Mmp12
YGLSAEVKNKLAQKYDH	Q2HJ38	12	28	N-terminus	MMP14 (P50281; MMP14_HUMAN). Mmp14 (P53690; MMP14_MOUSE). Mmp14 (Q10739; MMP14_RAT)	RGPAYGLS	MEROPS:M10.014	Endopeptidase (input)	-22.31	MEROPS score threshold (-22.96)	75	80.66		MMP14
RVLEDGSVYTAHAVV	Q28060	71	85	C-terminus	Mmp13 (P23097; MMP13_RAT). Mmp13 (P33435; MMP13_MOUSE). MMP13 (P45452; MMP13_HUMAN)	HAVVLSDE	MEROPS:M10.013	Endopeptidase (input)	-22.82	MEROPS score threshold (-23.33)	70	93.66		Mmp13
PAPPLVGLPPPP	Q1LZB5	18	29	N-terminus	Mmp12 (P34960; MMP12_MOUSE). MMP12 (P39900; MMP12_HUMAN). Mmp12 (Q63341; MMP12_RAT)	PPPPPAPP	MEROPS:M10.009	Endopeptidase (input)	-20.44	MEROPS score threshold (-22.75)	67	88.47		Mmp12
PAPPLVGLPPPP	Q1LZB5	18	29	C-terminus	Mmp12 (P34960; MMP12_MOUSE). MMP12 (P39900; MMP12_HUMAN). Mmp12 (Q63341; MMP12_RAT)	PPPPPSPP	MEROPS:M10.009	Endopeptidase (input)	-21.39	MEROPS score threshold (-22.75)	67	88.47		Mmp12
SKSKSASFKESYMAAFYE	Q28013	526	543	N-terminus	MMP14 (P50281; MMP14_HUMAN). Mmp14 (P53690; MMP14_MOUSE). Mmp14 (Q10739; MMP14_RAT)	LGSLSKSK	MEROPS:M10.014	Endopeptidase (input)	-22.49	MEROPS score threshold (-22.96)	75	80.66		MMP14
DGPPGPPGERGPQ	Q28083	676	688	N-terminus	Mmp12 (P34960; MMP12_MOUSE). MMP12 (P39900; MMP12_HUMAN). Mmp12 (Q63341; MMP12_RAT)	TSGGDGPP	MEROPS:M10.009	Endopeptidase (input)	-21.38	MEROPS score threshold (-22.75)	67	88.47		Mmp12
PGPMGLTGRPGPVGGPG	Q28083	298	314	C-terminus	Mmp12 (P34960; MMP12_MOUSE). MMP12 (P39900; MMP12_HUMAN). Mmp12 (Q63341; MMP12_RAT)	GGPGSSGA	MEROPS:M10.009	Endopeptidase (input)	-17	MEROPS score threshold (-22.75)	67	88.47		Mmp12
PGPMGLTGRPGPVGGPG	Q28083	298	314	C-terminus	Mmp13 (P23097; MMP13_RAT). Mmp13 (P33435; MMP13_MOUSE). MMP13 (P45452; MMP13_HUMAN)	GGPGSSGA	MEROPS:M10.013	Endopeptidase (input)	-18.31	MEROPS score threshold (-23.33)	70	93.66		Mmp13
PGPMGLTGRPGPVGGPG	Q28083	298	314	C-terminus	MMP14 (P50281; MMP14_HUMAN). Mmp14 (P53690; MMP14_MOUSE). Mmp14 (Q10739; MMP14_RAT)	GGPGSSGA	MEROPS:M10.014	Endopeptidase (input)	-19.82	MEROPS score threshold (-22.96)	75	80.66		MMP14
LGAGPASISCASFLAR	Q28007	193	208	N-terminus	Mmp12 (P34960; MMP12_MOUSE). MMP12 (P39900; MMP12_HUMAN). Mmp12 (Q63341; MMP12_RAT)	KIALLGAG	MEROPS:M10.009	Endopeptidase (input)	-17.89	MEROPS score threshold (-22.75)	67	88.47		Mmp12
LGAGPASISCASFLAR	Q28007	193	208	N-terminus	MMP14 (P50281; MMP14_HUMAN). Mmp14 (P53690; MMP14_MOUSE). Mmp14 (Q10739; MMP14_RAT)	KIALLGAG	MEROPS:M10.014	Endopeptidase (input)	-22.38	MEROPS score threshold (-22.96)	75	80.66		MMP14
LGAGPASISCASFLAR	Q28007	193	208	C-terminus	Mmp12 (P34960; MMP12_MOUSE). MMP12 (P39900; MMP12_HUMAN). Mmp12 (Q63341; MMP12_RAT)	FLARLGYN	MEROPS:M10.009	Endopeptidase (input)	-21.51	MEROPS score threshold (-22.75)	67	88.47		Mmp12
LVGVTAACTVRKRC	Q1RMT1	348	361	N-terminus	Mmp12 (P34960; MMP12_MOUSE). MMP12 (P39900; MMP12_HUMAN). Mmp12 (Q63341; MMP12_RAT)	AGKSLVGV	MEROPS:M10.009	Endopeptidase (input)	-17.88	MEROPS score threshold (-22.75)	67	88.47		Mmp12
LVGVTAACTVRKRC	Q1RMT1	348	361	N-terminus	Mmp13 (P23097; MMP13_RAT). Mmp13 (P33435; MMP13_MOUSE). MMP13 (P45452; MMP13_HUMAN)	AGKSLVGV	MEROPS:M10.013	Endopeptidase (input)	-19.16	MEROPS score threshold (-23.33)	70	93.66		Mmp13
LVGVTAACTVRKRC	Q1RMT1	348	361	N-terminus	MMP14 (P50281; MMP14_HUMAN). Mmp14 (P53690; MMP14_MOUSE). Mmp14 (Q10739; MMP14_RAT)	AGKSLVGV	MEROPS:M10.014	Endopeptidase (input)	-20.76	MEROPS score threshold (-22.96)	75	80.66		MMP14
PCIDLIERPANP	Q27991	517	528	C-terminus	Mmp12 (P34960; MMP12_MOUSE). MMP12 (P39900; MMP12_HUMAN). Mmp12 (Q63341; MMP12_RAT)	PANPPGVL	MEROPS:M10.009	Endopeptidase (input)	-22.32	MEROPS score threshold (-22.75)	67	88.47		Mmp12
KKIRSSPREAKNKRRS	Q29S11	35	50	N-terminus	Mmp12 (P34960; MMP12_MOUSE). MMP12 (P39900; MMP12_HUMAN). Mmp12 (Q63341; MMP12_RAT)	GPPAKKIR	MEROPS:M10.009	Endopeptidase (input)	-19.03	MEROPS score threshold (-22.75)	67	88.47		Mmp12
KKIRSSPREAKNKRRS	Q29S11	35	50	N-terminus	Mmp13 (P23097; MMP13_RAT). Mmp13 (P33435; MMP13_MOUSE). MMP13 (P45452; MMP13_HUMAN)	GPPAKKIR	MEROPS:M10.013	Endopeptidase (input)	-20.9	MEROPS score threshold (-23.33)	70	93.66		Mmp13
SVPVQVPGSEPDMSQ	Q1LZF1	402	416	N-terminus	Mmp12 (P34960; MMP12_MOUSE). MMP12 (P39900; MMP12_HUMAN). Mmp12 (Q63341; MMP12_RAT)	SPGVSVPV	MEROPS:M10.009	Endopeptidase (input)	-22.13	MEROPS score threshold (-22.75)	67	88.47		Mmp12
AVATSKPGLRP	Q1LZG6	31	41	N-terminus	Mmp12 (P34960; MMP12_MOUSE). MMP12 (P39900; MMP12_HUMAN). Mmp12 (Q63341; MMP12_RAT)	VPVAAVAT	MEROPS:M10.009	Endopeptidase (input)	-18.22	MEROPS score threshold (-22.75)	67	88.47		Mmp12
AVATSKPGLRP	Q1LZG6	31	41	N-terminus	Mmp13 (P23097; MMP13_RAT). Mmp13 (P33435; MMP13_MOUSE). MMP13 (P45452; MMP13_HUMAN)	VPVAAVAT	MEROPS:M10.013	Endopeptidase (input)	-19.45	MEROPS score threshold (-23.33)	70	93.66		Mmp13
AVATSKPGLRP	Q1LZG6	31	41	N-terminus	MMP14 (P50281; MMP14_HUMAN). Mmp14 (P53690; MMP14_MOUSE). Mmp14 (Q10739; MMP14_RAT)	VPVAAVAT	MEROPS:M10.014	Endopeptidase (input)	-20.51	MEROPS score threshold (-22.96)	75	80.66		MMP14
AVATSKPGLRP	Q1LZG6	31	41	C-terminus	Mmp12 (P34960; MMP12_MOUSE). MMP12 (P39900; MMP12_HUMAN). Mmp12 (Q63341; MMP12_RAT)	GLRPRTAL	MEROPS:M10.009	Endopeptidase (input)	-21.84	MEROPS score threshold (-22.75)	67	88.47		Mmp12
AVATSKPGLRP	Q1LZG6	31	41	C-terminus	Mmp13 (P23097; MMP13_RAT). Mmp13 (P33435; MMP13_MOUSE). MMP13 (P45452; MMP13_HUMAN)	GLRPRTAL	MEROPS:M10.013	Endopeptidase (input)	-20.04	MEROPS score threshold (-23.33)	70	93.66		Mmp13
AVATSKPGLRP	Q1LZG6	31	41	C-terminus	MMP14 (P50281; MMP14_HUMAN). Mmp14 (P53690; MMP14_MOUSE). Mmp14 (Q10739; MMP14_RAT)	GLRPRTAL	MEROPS:M10.014	Endopeptidase (input)	-22.28	MEROPS score threshold (-22.96)	75	80.66		MMP14
PSCMASCGGTIHNATLGR	Q29RN8	343	360	C-terminus	Mmp12 (P34960; MMP12_MOUSE). MMP12 (P39900; MMP12_HUMAN). Mmp12 (Q63341; MMP12_RAT)	TLGRIVSP	MEROPS:M10.009	Endopeptidase (input)	-22.31	MEROPS score threshold (-22.75)	67	88.47		Mmp12
PSCMASCGGTIHNATLGR	Q29RN8	343	360	C-terminus	Mmp13 (P23097; MMP13_RAT). Mmp13 (P33435; MMP13_MOUSE). MMP13 (P45452; MMP13_HUMAN)	TLGRIVSP	MEROPS:M10.013	Endopeptidase (input)	-21.87	MEROPS score threshold (-23.33)	70	93.66		Mmp13
PSCMASCGGTIHNATLGR	Q29RN8	343	360	C-terminus	MMP14 (P50281; MMP14_HUMAN). Mmp14 (P53690; MMP14_MOUSE). Mmp14 (Q10739; MMP14_RAT)	TLGRIVSP	MEROPS:M10.014	Endopeptidase (input)	-19.87	MEROPS score threshold (-22.96)	75	80.66		MMP14
PRAESGGKGER	Q29397	102	112	C-terminus	MMP14 (P50281; MMP14_HUMAN). Mmp14 (P53690; MMP14_MOUSE). Mmp14 (Q10739; MMP14_RAT)	KGERMADG	MEROPS:M10.014	Endopeptidase (input)	-22.77	MEROPS score threshold (-22.96)	75	80.66		MMP14
LVEAIEIYPLAEAEGVQIS	Q29RK0	877	895	N-terminus	Mmp12 (P34960; MMP12_MOUSE). MMP12 (P39900; MMP12_HUMAN). Mmp12 (Q63341; MMP12_RAT)	EALPLVEA	MEROPS:M10.009	Endopeptidase (input)	-19.09	MEROPS score threshold (-22.75)	67	88.47		Mmp12
LVEAIEIYPLAEAEGVQIS	Q29RK0	877	895	N-terminus	Mmp13 (P23097; MMP13_RAT). Mmp13 (P33435; MMP13_MOUSE). MMP13 (P45452; MMP13_HUMAN)	EALPLVEA	MEROPS:M10.013	Endopeptidase (input)	-19.69	MEROPS score threshold (-23.33)	70	93.66		Mmp13
LVEAIEIYPLAEAEGVQIS	Q29RK0	877	895	N-terminus	MMP14 (P50281; MMP14_HUMAN). Mmp14 (P53690; MMP14_MOUSE). Mmp14 (Q10739; MMP14_RAT)	EALPLVEA	MEROPS:M10.014	Endopeptidase (input)	-18.72	MEROPS score threshold (-22.96)	75	80.66		MMP14
NRKKEIEVLNAMMEGE	Q29RL0	927	942	N-terminus	MMP14 (P50281; MMP14_HUMAN). Mmp14 (P53690; MMP14_MOUSE). Mmp14 (Q10739; MMP14_RAT)	LLRKNRKK	MEROPS:M10.014	Endopeptidase (input)	-21.55	MEROPS score threshold (-22.96)	75	80.66		MMP14
PTRAALEAAADPALTADFK	Q27ID4	1103	1121	N-terminus	Mmp12 (P34960; MMP12_MOUSE). MMP12 (P39900; MMP12_HUMAN). Mmp12 (Q63341; MMP12_RAT)	QLPGPTRA	MEROPS:M10.009	Endopeptidase (input)	-22.02	MEROPS score threshold (-22.75)	67	88.47		Mmp12
PTRAALEAAADPALTADFK	Q27ID4	1103	1121	N-terminus	MMP14 (P50281; MMP14_HUMAN). Mmp14 (P53690; MMP14_MOUSE). Mmp14 (Q10739; MMP14_RAT)	QLPGPTRA	MEROPS:M10.014	Endopeptidase (input)	-22.59	MEROPS score threshold (-22.96)	75	80.66		MMP14
SQGFPDTYRLFGNIL	Q24K09	1552	1566	N-terminus	MMP14 (P50281; MMP14_HUMAN). Mmp14 (P53690; MMP14_MOUSE). Mmp14 (Q10739; MMP14_RAT)	ECARSQGF	MEROPS:M10.014	Endopeptidase (input)	-22.82	MEROPS score threshold (-22.96)	75	80.66		MMP14
PPRPEPPAPEAPAPEP	Q28181	1287	1302	C-terminus	Mmp12 (P34960; MMP12_MOUSE). MMP12 (P39900; MMP12_HUMAN). Mmp12 (Q63341; MMP12_RAT)	APEPTAPE	MEROPS:M10.009	Endopeptidase (input)	-21.05	MEROPS score threshold (-22.75)	67	88.47		Mmp12
PPRPEPPAPEAPAPEP	Q28181	1287	1302	C-terminus	MMP14 (P50281; MMP14_HUMAN). Mmp14 (P53690; MMP14_MOUSE). Mmp14 (Q10739; MMP14_RAT)	APEPTAPE	MEROPS:M10.014	Endopeptidase (input)	-21.91	MEROPS score threshold (-22.96)	75	80.66		MMP14
LASYGAHGAQFPDAYGKE	Q2KI29	22	39	N-terminus	Mmp12 (P34960; MMP12_MOUSE). MMP12 (P39900; MMP12_HUMAN). Mmp12 (Q63341; MMP12_RAT)	GALGLASY	MEROPS:M10.009	Endopeptidase (input)	-16.69	MEROPS score threshold (-22.75)	67	88.47		Mmp12
LASYGAHGAQFPDAYGKE	Q2KI29	22	39	N-terminus	Mmp13 (P23097; MMP13_RAT). Mmp13 (P33435; MMP13_MOUSE). MMP13 (P45452; MMP13_HUMAN)	GALGLASY	MEROPS:M10.013	Endopeptidase (input)	-16.73	MEROPS score threshold (-23.33)	70	93.66		Mmp13
LASYGAHGAQFPDAYGKE	Q2KI29	22	39	N-terminus	MMP14 (P50281; MMP14_HUMAN). Mmp14 (P53690; MMP14_MOUSE). Mmp14 (Q10739; MMP14_RAT)	GALGLASY	MEROPS:M10.014	Endopeptidase (input)	-18.04	MEROPS score threshold (-22.96)	75	80.66		MMP14
TSSGSPPGLAAVPVE	Q2KIS6	72	86	C-terminus	MMP14 (P50281; MMP14_HUMAN). Mmp14 (P53690; MMP14_MOUSE). Mmp14 (Q10739; MMP14_RAT)	VPVESAME	MEROPS:M10.014	Endopeptidase (input)	-22.55	MEROPS score threshold (-22.96)	75	80.66		MMP14
GGSRGAEALHYIGSR	Q2HJ74	9	23	C-terminus	MMP14 (P50281; MMP14_HUMAN). Mmp14 (P53690; MMP14_MOUSE). Mmp14 (Q10739; MMP14_RAT)	IGSRLGRT	MEROPS:M10.014	Endopeptidase (input)	-21.87	MEROPS score threshold (-22.96)	75	80.66		MMP14
LRCSGGMRLTATYRY	Q2KI78	108	122	N-terminus	MMP14 (P50281; MMP14_HUMAN). Mmp14 (P53690; MMP14_MOUSE). Mmp14 (Q10739; MMP14_RAT)	KALRLRCS	MEROPS:M10.014	Endopeptidase (input)	-21.08	MEROPS score threshold (-22.96)	75	80.66		MMP14
DVISQQLVERRGLQAHQAG	Q2KIN6	31	49	C-terminus	MMP14 (P50281; MMP14_HUMAN). Mmp14 (P53690; MMP14_MOUSE). Mmp14 (Q10739; MMP14_RAT)	HQAGRTLT	MEROPS:M10.014	Endopeptidase (input)	-22.38	MEROPS score threshold (-22.96)	75	80.66		MMP14
DCRLFEDTLVN	Q2HJ93	278	288	C-terminus	Mmp12 (P34960; MMP12_MOUSE). MMP12 (P39900; MMP12_HUMAN). Mmp12 (Q63341; MMP12_RAT)	TLVNFQAA	MEROPS:M10.009	Endopeptidase (input)	-21.97	MEROPS score threshold (-22.75)	67	88.47		Mmp12
DCRLFEDTLVN	Q2HJ93	278	288	C-terminus	Mmp13 (P23097; MMP13_RAT). Mmp13 (P33435; MMP13_MOUSE). MMP13 (P45452; MMP13_HUMAN)	TLVNFQAA	MEROPS:M10.013	Endopeptidase (input)	-22.04	MEROPS score threshold (-23.33)	70	93.66		Mmp13
DCRLFEDTLVN	Q2HJ93	278	288	C-terminus	MMP14 (P50281; MMP14_HUMAN). Mmp14 (P53690; MMP14_MOUSE). Mmp14 (Q10739; MMP14_RAT)	TLVNFQAA	MEROPS:M10.014	Endopeptidase (input)	-21.29	MEROPS score threshold (-22.96)	75	80.66		MMP14
RVVRTLQNTPSLHS	Q2KII7	173	186	N-terminus	MMP14 (P50281; MMP14_HUMAN). Mmp14 (P53690; MMP14_MOUSE). Mmp14 (Q10739; MMP14_RAT)	KRSNRVVR	MEROPS:M10.014	Endopeptidase (input)	-22.95	MEROPS score threshold (-22.96)	75	80.66		MMP14
GMGHLWRKVHTV	Q2T9W2	458	469	N-terminus	MMP14 (P50281; MMP14_HUMAN). Mmp14 (P53690; MMP14_MOUSE). Mmp14 (Q10739; MMP14_RAT)	KALSGMGH	MEROPS:M10.014	Endopeptidase (input)	-22.84	MEROPS score threshold (-22.96)	75	80.66		MMP14
QLELRAGAEQLDAL	Q2KI74	115	128	C-terminus	MMP14 (P50281; MMP14_HUMAN). Mmp14 (P53690; MMP14_MOUSE). Mmp14 (Q10739; MMP14_RAT)	LDALLTNE	MEROPS:M10.014	Endopeptidase (input)	-22.09	MEROPS score threshold (-22.96)	75	80.66		MMP14
QVDGKTIKAQIWDTAGQER	Q2TA29	54	72	C-terminus	Mmp12 (P34960; MMP12_MOUSE). MMP12 (P39900; MMP12_HUMAN). Mmp12 (Q63341; MMP12_RAT)	GQERYRAI	MEROPS:M10.009	Endopeptidase (input)	-21.7	MEROPS score threshold (-22.75)	67	88.47		Mmp12
QVDGKTIKAQIWDTAGQER	Q2TA29	54	72	C-terminus	Mmp13 (P23097; MMP13_RAT). Mmp13 (P33435; MMP13_MOUSE). MMP13 (P45452; MMP13_HUMAN)	GQERYRAI	MEROPS:M10.013	Endopeptidase (input)	-22.47	MEROPS score threshold (-23.33)	70	93.66		Mmp13
QVDGKTIKAQIWDTAGQER	Q2TA29	54	72	C-terminus	MMP14 (P50281; MMP14_HUMAN). Mmp14 (P53690; MMP14_MOUSE). Mmp14 (Q10739; MMP14_RAT)	GQERYRAI	MEROPS:M10.014	Endopeptidase (input)	-22.02	MEROPS score threshold (-22.96)	75	80.66		MMP14
LPKEPAPPSLESQPP	Q2KHT9	158	172	N-terminus	Mmp13 (P23097; MMP13_RAT). Mmp13 (P33435; MMP13_MOUSE). MMP13 (P45452; MMP13_HUMAN)	EPPCLPKE	MEROPS:M10.013	Endopeptidase (input)	-22.88	MEROPS score threshold (-23.33)	70	93.66		Mmp13
ASTFLSPAFPGSQT	Q2LGB3	139	152	N-terminus	Mmp12 (P34960; MMP12_MOUSE). MMP12 (P39900; MMP12_HUMAN). Mmp12 (Q63341; MMP12_RAT)	LPSLASTF	MEROPS:M10.009	Endopeptidase (input)	-22.68	MEROPS score threshold (-22.75)	67	88.47		Mmp12
ASTFLSPAFPGSQT	Q2LGB3	139	152	N-terminus	Mmp13 (P23097; MMP13_RAT). Mmp13 (P33435; MMP13_MOUSE). MMP13 (P45452; MMP13_HUMAN)	LPSLASTF	MEROPS:M10.013	Endopeptidase (input)	-23	MEROPS score threshold (-23.33)	70	93.66		Mmp13
ASTFLSPAFPGSQT	Q2LGB3	139	152	N-terminus	MMP14 (P50281; MMP14_HUMAN). Mmp14 (P53690; MMP14_MOUSE). Mmp14 (Q10739; MMP14_RAT)	LPSLASTF	MEROPS:M10.014	Endopeptidase (input)	-21.73	MEROPS score threshold (-22.96)	75	80.66		MMP14
PDGVKKRKSSSSVQMMES	Q2HJF7	323	340	N-terminus	Mmp12 (P34960; MMP12_MOUSE). MMP12 (P39900; MMP12_HUMAN). Mmp12 (Q63341; MMP12_RAT)	LLKKPDGV	MEROPS:M10.009	Endopeptidase (input)	-22.47	MEROPS score threshold (-22.75)	67	88.47		Mmp12
NFGGGNTAWEEKTLSKYEF	Q2KIT5	49	67	N-terminus	Mmp12 (P34960; MMP12_MOUSE). MMP12 (P39900; MMP12_HUMAN). Mmp12 (Q63341; MMP12_RAT)	TAKKNFGG	MEROPS:M10.009	Endopeptidase (input)	-21.65	MEROPS score threshold (-22.75)	67	88.47		Mmp12
NFGGGNTAWEEKTLSKYEF	Q2KIT5	49	67	N-terminus	Mmp13 (P23097; MMP13_RAT). Mmp13 (P33435; MMP13_MOUSE). MMP13 (P45452; MMP13_HUMAN)	TAKKNFGG	MEROPS:M10.013	Endopeptidase (input)	-22.9	MEROPS score threshold (-23.33)	70	93.66		Mmp13
NFGGGNTAWEEKTLSKYEF	Q2KIT5	49	67	N-terminus	MMP14 (P50281; MMP14_HUMAN). Mmp14 (P53690; MMP14_MOUSE). Mmp14 (Q10739; MMP14_RAT)	TAKKNFGG	MEROPS:M10.014	Endopeptidase (input)	-22.67	MEROPS score threshold (-22.96)	75	80.66		MMP14
QQDSHAPLRDSRGGSFE	Q2NKY8	238	254	C-terminus	Mmp13 (P23097; MMP13_RAT). Mmp13 (P33435; MMP13_MOUSE). MMP13 (P45452; MMP13_HUMAN)	GSFEMTDD	MEROPS:M10.013	Endopeptidase (input)	-22.98	MEROPS score threshold (-23.33)	70	93.66		Mmp13
LAEFGEYIRKVFPT	Q2T9M7	76	89	N-terminus	MMP14 (P50281; MMP14_HUMAN). Mmp14 (P53690; MMP14_MOUSE). Mmp14 (Q10739; MMP14_RAT)	NTTALAEF	MEROPS:M10.014	Endopeptidase (input)	-21.41	MEROPS score threshold (-22.96)	75	80.66		MMP14
AVGGSGSGSTSGCGSAS	Q2T9W9	31	47	N-terminus	Mmp12 (P34960; MMP12_MOUSE). MMP12 (P39900; MMP12_HUMAN). Mmp12 (Q63341; MMP12_RAT)	DLVPAVGG	MEROPS:M10.009	Endopeptidase (input)	-20.5	MEROPS score threshold (-22.75)	67	88.47		Mmp12
AVGGSGSGSTSGCGSAS	Q2T9W9	31	47	N-terminus	Mmp13 (P23097; MMP13_RAT). Mmp13 (P33435; MMP13_MOUSE). MMP13 (P45452; MMP13_HUMAN)	DLVPAVGG	MEROPS:M10.013	Endopeptidase (input)	-19.86	MEROPS score threshold (-23.33)	70	93.66		Mmp13
AVGGSGSGSTSGCGSAS	Q2T9W9	31	47	N-terminus	MMP14 (P50281; MMP14_HUMAN). Mmp14 (P53690; MMP14_MOUSE). Mmp14 (Q10739; MMP14_RAT)	DLVPAVGG	MEROPS:M10.014	Endopeptidase (input)	-21.04	MEROPS score threshold (-22.96)	75	80.66		MMP14
AVGGSGSGSTSGCGSAS	Q2T9W9	31	47	C-terminus	Mmp12 (P34960; MMP12_MOUSE). MMP12 (P39900; MMP12_HUMAN). Mmp12 (Q63341; MMP12_RAT)	GSASGCGS	MEROPS:M10.009	Endopeptidase (input)	-22.69	MEROPS score threshold (-22.75)	67	88.47		Mmp12
GPRVKDGGALGTKAAQ	Q2HJ91	267	282	N-terminus	Mmp12 (P34960; MMP12_MOUSE). MMP12 (P39900; MMP12_HUMAN). Mmp12 (Q63341; MMP12_RAT)	GSLGGPRV	MEROPS:M10.009	Endopeptidase (input)	-21.94	MEROPS score threshold (-22.75)	67	88.47		Mmp12
GPRVKDGGALGTKAAQ	Q2HJ91	267	282	N-terminus	MMP14 (P50281; MMP14_HUMAN). Mmp14 (P53690; MMP14_MOUSE). Mmp14 (Q10739; MMP14_RAT)	GSLGGPRV	MEROPS:M10.014	Endopeptidase (input)	-20.53	MEROPS score threshold (-22.96)	75	80.66		MMP14
GPRVKDGGALGTKAAQ	Q2HJ91	267	282	C-terminus	Mmp12 (P34960; MMP12_MOUSE). MMP12 (P39900; MMP12_HUMAN). Mmp12 (Q63341; MMP12_RAT)	KAAQAKAA	MEROPS:M10.009	Endopeptidase (input)	-15.95	MEROPS score threshold (-22.75)	67	88.47		Mmp12
GPRVKDGGALGTKAAQ	Q2HJ91	267	282	C-terminus	Mmp13 (P23097; MMP13_RAT). Mmp13 (P33435; MMP13_MOUSE). MMP13 (P45452; MMP13_HUMAN)	KAAQAKAA	MEROPS:M10.013	Endopeptidase (input)	-22.98	MEROPS score threshold (-23.33)	70	93.66		Mmp13
GPRVKDGGALGTKAAQ	Q2HJ91	267	282	C-terminus	MMP14 (P50281; MMP14_HUMAN). Mmp14 (P53690; MMP14_MOUSE). Mmp14 (Q10739; MMP14_RAT)	KAAQAKAA	MEROPS:M10.014	Endopeptidase (input)	-21.64	MEROPS score threshold (-22.96)	75	80.66		MMP14
LMLADNGVCC	Q2KIZ8	449	458	N-terminus	Mmp12 (P34960; MMP12_MOUSE). MMP12 (P39900; MMP12_HUMAN). Mmp12 (Q63341; MMP12_RAT)	EAGALMLA	MEROPS:M10.009	Endopeptidase (input)	-18.01	MEROPS score threshold (-22.75)	67	88.47		Mmp12
LMLADNGVCC	Q2KIZ8	449	458	N-terminus	MMP14 (P50281; MMP14_HUMAN). Mmp14 (P53690; MMP14_MOUSE). Mmp14 (Q10739; MMP14_RAT)	EAGALMLA	MEROPS:M10.014	Endopeptidase (input)	-19.4	MEROPS score threshold (-22.96)	75	80.66		MMP14
AFLHYRDPAEAQQAIAC	Q2KI24	321	337	C-terminus	Mmp13 (P23097; MMP13_RAT). Mmp13 (P33435; MMP13_MOUSE). MMP13 (P45452; MMP13_HUMAN)	AIACLQGF	MEROPS:M10.013	Endopeptidase (input)	-21.31	MEROPS score threshold (-23.33)	70	93.66		Mmp13
VTHDAAHAQM	Q2KI13	638	647	N-terminus	MMP14 (P50281; MMP14_HUMAN). Mmp14 (P53690; MMP14_MOUSE). Mmp14 (Q10739; MMP14_RAT)	QSVNVTHD	MEROPS:M10.014	Endopeptidase (input)	-22.87	MEROPS score threshold (-22.96)	75	80.66		MMP14
SDIPSQLEDADLLLAE	Q2KI13	335	350	C-terminus	Mmp12 (P34960; MMP12_MOUSE). MMP12 (P39900; MMP12_HUMAN). Mmp12 (Q63341; MMP12_RAT)	LLAEAMRL	MEROPS:M10.009	Endopeptidase (input)	-22.33	MEROPS score threshold (-22.75)	67	88.47		Mmp12
SDIPSQLEDADLLLAE	Q2KI13	335	350	C-terminus	MMP14 (P50281; MMP14_HUMAN). Mmp14 (P53690; MMP14_MOUSE). Mmp14 (Q10739; MMP14_RAT)	LLAEAMRL	MEROPS:M10.014	Endopeptidase (input)	-21.82	MEROPS score threshold (-22.96)	75	80.66		MMP14
PPPPPGLSSSGV	Q2TA49	185	196	N-terminus	Mmp12 (P34960; MMP12_MOUSE). MMP12 (P39900; MMP12_HUMAN). Mmp12 (Q63341; MMP12_RAT)	PPPGPPPP	MEROPS:M10.009	Endopeptidase (input)	-21.1	MEROPS score threshold (-22.75)	67	88.47		Mmp12
PPPPPGLSSSGV	Q2TA49	185	196	C-terminus	Mmp12 (P34960; MMP12_MOUSE). MMP12 (P39900; MMP12_HUMAN). Mmp12 (Q63341; MMP12_RAT)	SSGVSAAT	MEROPS:M10.009	Endopeptidase (input)	-22.32	MEROPS score threshold (-22.75)	67	88.47		Mmp12
LPSITGRLDYAGSDLTTYL	Q32KZ2	238	256	N-terminus	MMP14 (P50281; MMP14_HUMAN). Mmp14 (P53690; MMP14_MOUSE). Mmp14 (Q10739; MMP14_RAT)	EGYPLPSI	MEROPS:M10.014	Endopeptidase (input)	-22.79	MEROPS score threshold (-22.96)	75	80.66		MMP14
DCMGDMDGRAPGGASV	Q32KR8	94	109	C-terminus	Mmp13 (P23097; MMP13_RAT). Mmp13 (P33435; MMP13_MOUSE). MMP13 (P45452; MMP13_HUMAN)	GASVQNAM	MEROPS:M10.013	Endopeptidase (input)	-22.93	MEROPS score threshold (-23.33)	70	93.66		Mmp13
AKQGLKKPVRGKQA	Q2YDJ8	153	166	N-terminus	Mmp12 (P34960; MMP12_MOUSE). MMP12 (P39900; MMP12_HUMAN). Mmp12 (Q63341; MMP12_RAT)	NAAAAKQG	MEROPS:M10.009	Endopeptidase (input)	-17.76	MEROPS score threshold (-22.75)	67	88.47		Mmp12
AKQGLKKPVRGKQA	Q2YDJ8	153	166	N-terminus	Mmp13 (P23097; MMP13_RAT). Mmp13 (P33435; MMP13_MOUSE). MMP13 (P45452; MMP13_HUMAN)	NAAAAKQG	MEROPS:M10.013	Endopeptidase (input)	-23.06	MEROPS score threshold (-23.33)	70	93.66		Mmp13
AKQGLKKPVRGKQA	Q2YDJ8	153	166	N-terminus	MMP14 (P50281; MMP14_HUMAN). Mmp14 (P53690; MMP14_MOUSE). Mmp14 (Q10739; MMP14_RAT)	NAAAAKQG	MEROPS:M10.014	Endopeptidase (input)	-21.31	MEROPS score threshold (-22.96)	75	80.66		MMP14
LPSLLLGTLLTFTSG	Q2TBI0	1	22	C-terminus	Mmp12 (P34960; MMP12_MOUSE). MMP12 (P39900; MMP12_HUMAN). Mmp12 (Q63341; MMP12_RAT)	FTSGALGA	MEROPS:M10.009	Endopeptidase (input)	-21.34	MEROPS score threshold (-22.75)	67	88.47		Mmp12
LPSLLLGTLLTFTSG	Q2TBI0	1	22	C-terminus	Mmp13 (P23097; MMP13_RAT). Mmp13 (P33435; MMP13_MOUSE). MMP13 (P45452; MMP13_HUMAN)	FTSGALGA	MEROPS:M10.013	Endopeptidase (input)	-22.22	MEROPS score threshold (-23.33)	70	93.66		Mmp13
PGAEPLSPQPLPS	Q32LP9	399	411	C-terminus	Mmp13 (P23097; MMP13_RAT). Mmp13 (P33435; MMP13_MOUSE). MMP13 (P45452; MMP13_HUMAN)	PLPSERTL	MEROPS:M10.013	Endopeptidase (input)	-22.98	MEROPS score threshold (-23.33)	70	93.66		Mmp13
GEGGRKNSSNFKK	Q32PJ8	427	439	N-terminus	MMP14 (P50281; MMP14_HUMAN). Mmp14 (P53690; MMP14_MOUSE). Mmp14 (Q10739; MMP14_RAT)	SDEEGEGG	MEROPS:M10.014	Endopeptidase (input)	-22.93	MEROPS score threshold (-22.96)	75	80.66		MMP14
KIWKSHYVPPPE	Q32LF5	98	109	C-terminus	Mmp13 (P23097; MMP13_RAT). Mmp13 (P33435; MMP13_MOUSE). MMP13 (P45452; MMP13_HUMAN)	PPPETYST	MEROPS:M10.013	Endopeptidase (input)	-22.58	MEROPS score threshold (-23.33)	70	93.66		Mmp13
KIWKSHYVPPPE	Q32LF5	98	109	C-terminus	MMP14 (P50281; MMP14_HUMAN). Mmp14 (P53690; MMP14_MOUSE). Mmp14 (Q10739; MMP14_RAT)	PPPETYST	MEROPS:M10.014	Endopeptidase (input)	-22.76	MEROPS score threshold (-22.96)	75	80.66		MMP14
FKNLKRVAKELGENLS	Q2TBN3	123	138	C-terminus	MMP14 (P50281; MMP14_HUMAN). Mmp14 (P53690; MMP14_MOUSE). Mmp14 (Q10739; MMP14_RAT)	ENLSDEEL	MEROPS:M10.014	Endopeptidase (input)	-22.89	MEROPS score threshold (-22.96)	75	80.66		MMP14
SCEAFPQGLLVFTGSS	Q32P68	15	30	C-terminus	MMP14 (P50281; MMP14_HUMAN). Mmp14 (P53690; MMP14_MOUSE). Mmp14 (Q10739; MMP14_RAT)	TGSSDRDA	MEROPS:M10.014	Endopeptidase (input)	-22.89	MEROPS score threshold (-22.96)	75	80.66		MMP14
FTAIAGSEIFSLEM	Q2TBU9	100	113	C-terminus	MMP14 (P50281; MMP14_HUMAN). Mmp14 (P53690; MMP14_MOUSE). Mmp14 (Q10739; MMP14_RAT)	SLEMSKTE	MEROPS:M10.014	Endopeptidase (input)	-21.96	MEROPS score threshold (-22.96)	75	80.66		MMP14
PPAPAPLEKPIVLMK	Q2YDD2	88	102	N-terminus	Mmp12 (P34960; MMP12_MOUSE). MMP12 (P39900; MMP12_HUMAN). Mmp12 (Q63341; MMP12_RAT)	APAAPPAP	MEROPS:M10.009	Endopeptidase (input)	-17.22	MEROPS score threshold (-22.75)	67	88.47		Mmp12
PPAPAPLEKPIVLMK	Q2YDD2	88	102	N-terminus	MMP14 (P50281; MMP14_HUMAN). Mmp14 (P53690; MMP14_MOUSE). Mmp14 (Q10739; MMP14_RAT)	APAAPPAP	MEROPS:M10.014	Endopeptidase (input)	-21.16	MEROPS score threshold (-22.96)	75	80.66		MMP14
SAVGEGKPVLTEEER	Q32KW2	77	91	N-terminus	Mmp12 (P34960; MMP12_MOUSE). MMP12 (P39900; MMP12_HUMAN). Mmp12 (Q63341; MMP12_RAT)	KGPGSAVG	MEROPS:M10.009	Endopeptidase (input)	-19.59	MEROPS score threshold (-22.75)	67	88.47		Mmp12
SAVGEGKPVLTEEER	Q32KW2	77	91	N-terminus	MMP14 (P50281; MMP14_HUMAN). Mmp14 (P53690; MMP14_MOUSE). Mmp14 (Q10739; MMP14_RAT)	KGPGSAVG	MEROPS:M10.014	Endopeptidase (input)	-21.59	MEROPS score threshold (-22.96)	75	80.66		MMP14
PPGKAGRRG	Q32S24	530	538	N-terminus	Mmp12 (P34960; MMP12_MOUSE). MMP12 (P39900; MMP12_HUMAN). Mmp12 (Q63341; MMP12_RAT)	GLMGPPGK	MEROPS:M10.009	Endopeptidase (input)	-20.88	MEROPS score threshold (-22.75)	67	88.47		Mmp12
PPGKAGRRG	Q32S24	530	538	C-terminus	Mmp12 (P34960; MMP12_MOUSE). MMP12 (P39900; MMP12_HUMAN). Mmp12 (Q63341; MMP12_RAT)	GRRGRAGA	MEROPS:M10.009	Endopeptidase (input)	-20.7	MEROPS score threshold (-22.75)	67	88.47		Mmp12
PPGKAGRRG	Q32S24	530	538	C-terminus	Mmp13 (P23097; MMP13_RAT). Mmp13 (P33435; MMP13_MOUSE). MMP13 (P45452; MMP13_HUMAN)	GRRGRAGA	MEROPS:M10.013	Endopeptidase (input)	-20.24	MEROPS score threshold (-23.33)	70	93.66		Mmp13
PPGKAGRRG	Q32S24	530	538	C-terminus	MMP14 (P50281; MMP14_HUMAN). Mmp14 (P53690; MMP14_MOUSE). Mmp14 (Q10739; MMP14_RAT)	GRRGRAGA	MEROPS:M10.014	Endopeptidase (input)	-22.06	MEROPS score threshold (-22.96)	75	80.66		MMP14
GLSAPGLSVLE	Q32PG9	239	249	N-terminus	MMP14 (P50281; MMP14_HUMAN). Mmp14 (P53690; MMP14_MOUSE). Mmp14 (Q10739; MMP14_RAT)	LTVRGLSA	MEROPS:M10.014	Endopeptidase (input)	-22.01	MEROPS score threshold (-22.96)	75	80.66		MMP14
GRGRSVSGGRGRGGPRG	Q2TBT7	444	460	N-terminus	Mmp13 (P23097; MMP13_RAT). Mmp13 (P33435; MMP13_MOUSE). MMP13 (P45452; MMP13_HUMAN)	RRPGGRGR	MEROPS:M10.013	Endopeptidase (input)	-22.36	MEROPS score threshold (-23.33)	70	93.66		Mmp13
GRGRSVSGGRGRGGPRG	Q2TBT7	444	460	N-terminus	MMP14 (P50281; MMP14_HUMAN). Mmp14 (P53690; MMP14_MOUSE). Mmp14 (Q10739; MMP14_RAT)	RRPGGRGR	MEROPS:M10.014	Endopeptidase (input)	-21.09	MEROPS score threshold (-22.96)	75	80.66		MMP14
GRGRSVSGGRGRGGPRG	Q2TBT7	444	460	C-terminus	Mmp12 (P34960; MMP12_MOUSE). MMP12 (P39900; MMP12_HUMAN). Mmp12 (Q63341; MMP12_RAT)	GPRGGKSS	MEROPS:M10.009	Endopeptidase (input)	-19.64	MEROPS score threshold (-22.75)	67	88.47		Mmp12
GRGRSVSGGRGRGGPRG	Q2TBT7	444	460	C-terminus	Mmp13 (P23097; MMP13_RAT). Mmp13 (P33435; MMP13_MOUSE). MMP13 (P45452; MMP13_HUMAN)	GPRGGKSS	MEROPS:M10.013	Endopeptidase (input)	-17.64	MEROPS score threshold (-23.33)	70	93.66		Mmp13
GRGRSVSGGRGRGGPRG	Q2TBT7	444	460	C-terminus	MMP14 (P50281; MMP14_HUMAN). Mmp14 (P53690; MMP14_MOUSE). Mmp14 (Q10739; MMP14_RAT)	GPRGGKSS	MEROPS:M10.014	Endopeptidase (input)	-18.98	MEROPS score threshold (-22.96)	75	80.66		MMP14
QCPPGGLPEK	Q2TBI8	10	19	C-terminus	Mmp12 (P34960; MMP12_MOUSE). MMP12 (P39900; MMP12_HUMAN). Mmp12 (Q63341; MMP12_RAT)	LPEKQVRA	MEROPS:M10.009	Endopeptidase (input)	-20.46	MEROPS score threshold (-22.75)	67	88.47		Mmp12
QCPPGGLPEK	Q2TBI8	10	19	C-terminus	MMP14 (P50281; MMP14_HUMAN). Mmp14 (P53690; MMP14_MOUSE). Mmp14 (Q10739; MMP14_RAT)	LPEKQVRA	MEROPS:M10.014	Endopeptidase (input)	-19.55	MEROPS score threshold (-22.96)	75	80.66		MMP14
VPAVSSVSHTA	Q32S26	215	225	C-terminus	MMP14 (P50281; MMP14_HUMAN). Mmp14 (P53690; MMP14_MOUSE). Mmp14 (Q10739; MMP14_RAT)	SHTALYTP	MEROPS:M10.014	Endopeptidase (input)	-21.79	MEROPS score threshold (-22.96)	75	80.66		MMP14
WINRITAASQEHG	Q2TBR2	68	80	C-terminus	Mmp12 (P34960; MMP12_MOUSE). MMP12 (P39900; MMP12_HUMAN). Mmp12 (Q63341; MMP12_RAT)	QEHGLKYP	MEROPS:M10.009	Endopeptidase (input)	-21.99	MEROPS score threshold (-22.75)	67	88.47		Mmp12
WINRITAASQEHG	Q2TBR2	68	80	C-terminus	Mmp13 (P23097; MMP13_RAT). Mmp13 (P33435; MMP13_MOUSE). MMP13 (P45452; MMP13_HUMAN)	QEHGLKYP	MEROPS:M10.013	Endopeptidase (input)	-23.1	MEROPS score threshold (-23.33)	70	93.66		Mmp13
REPKLSENIKNAMLIKG	Q2YDN6	22	38	C-terminus	Mmp13 (P23097; MMP13_RAT). Mmp13 (P33435; MMP13_MOUSE). MMP13 (P45452; MMP13_HUMAN)	LIKGGNAN	MEROPS:M10.013	Endopeptidase (input)	-23.02	MEROPS score threshold (-23.33)	70	93.66		Mmp13
REPKLSENIKNAMLIKG	Q2YDN6	22	38	C-terminus	MMP14 (P50281; MMP14_HUMAN). Mmp14 (P53690; MMP14_MOUSE). Mmp14 (Q10739; MMP14_RAT)	LIKGGNAN	MEROPS:M10.014	Endopeptidase (input)	-21.54	MEROPS score threshold (-22.96)	75	80.66		MMP14
GNQRELARQKNMKKSQE	Q32P76	4	20	C-terminus	Mmp12 (P34960; MMP12_MOUSE). MMP12 (P39900; MMP12_HUMAN). Mmp12 (Q63341; MMP12_RAT)	KSQEISKG	MEROPS:M10.009	Endopeptidase (input)	-22.73	MEROPS score threshold (-22.75)	67	88.47		Mmp12
GNQRELARQKNMKKSQE	Q32P76	4	20	C-terminus	MMP14 (P50281; MMP14_HUMAN). Mmp14 (P53690; MMP14_MOUSE). Mmp14 (Q10739; MMP14_RAT)	KSQEISKG	MEROPS:M10.014	Endopeptidase (input)	-20.41	MEROPS score threshold (-22.96)	75	80.66		MMP14
GEAANPKPLGVSEEKDQEP	Q32LK9	302	320	N-terminus	Mmp12 (P34960; MMP12_MOUSE). MMP12 (P39900; MMP12_HUMAN). Mmp12 (Q63341; MMP12_RAT)	EAGLGEAA	MEROPS:M10.009	Endopeptidase (input)	-20.42	MEROPS score threshold (-22.75)	67	88.47		Mmp12
GEAANPKPLGVSEEKDQEP	Q32LK9	302	320	N-terminus	MMP14 (P50281; MMP14_HUMAN). Mmp14 (P53690; MMP14_MOUSE). Mmp14 (Q10739; MMP14_RAT)	EAGLGEAA	MEROPS:M10.014	Endopeptidase (input)	-22.06	MEROPS score threshold (-22.96)	75	80.66		MMP14
EKPYRCSECWKTFSQS	Q32KN0	408	423	C-terminus	MMP14 (P50281; MMP14_HUMAN). Mmp14 (P53690; MMP14_MOUSE). Mmp14 (Q10739; MMP14_RAT)	FSQSSTLV	MEROPS:M10.014	Endopeptidase (input)	-22.67	MEROPS score threshold (-22.96)	75	80.66		MMP14
LRAEKERSLVDGKSQEKE	Q32KY1	567	584	N-terminus	Mmp12 (P34960; MMP12_MOUSE). MMP12 (P39900; MMP12_HUMAN). Mmp12 (Q63341; MMP12_RAT)	EPLDLRAE	MEROPS:M10.009	Endopeptidase (input)	-20.56	MEROPS score threshold (-22.75)	67	88.47		Mmp12
LRAEKERSLVDGKSQEKE	Q32KY1	567	584	N-terminus	Mmp13 (P23097; MMP13_RAT). Mmp13 (P33435; MMP13_MOUSE). MMP13 (P45452; MMP13_HUMAN)	EPLDLRAE	MEROPS:M10.013	Endopeptidase (input)	-17.5	MEROPS score threshold (-23.33)	70	93.66		Mmp13
LRAEKERSLVDGKSQEKE	Q32KY1	567	584	N-terminus	MMP14 (P50281; MMP14_HUMAN). Mmp14 (P53690; MMP14_MOUSE). Mmp14 (Q10739; MMP14_RAT)	EPLDLRAE	MEROPS:M10.014	Endopeptidase (input)	-18.04	MEROPS score threshold (-22.96)	75	80.66		MMP14
CTSPNPTVCFLKER	Q3MHN5	190	203	C-terminus	MMP14 (P50281; MMP14_HUMAN). Mmp14 (P53690; MMP14_MOUSE). Mmp14 (Q10739; MMP14_RAT)	LKERLQLK	MEROPS:M10.014	Endopeptidase (input)	-20.45	MEROPS score threshold (-22.96)	75	80.66		MMP14
PPGAVPPGARFDPFG	Q3SX30	232	246	C-terminus	Mmp12 (P34960; MMP12_MOUSE). MMP12 (P39900; MMP12_HUMAN). Mmp12 (Q63341; MMP12_RAT)	DPFGPIGT	MEROPS:M10.009	Endopeptidase (input)	-20.88	MEROPS score threshold (-22.75)	67	88.47		Mmp12
EKDVDGLDRTAGAIRG	Q3MHM6	532	547	C-terminus	Mmp12 (P34960; MMP12_MOUSE). MMP12 (P39900; MMP12_HUMAN). Mmp12 (Q63341; MMP12_RAT)	AIRGRAAR	MEROPS:M10.009	Endopeptidase (input)	-21.94	MEROPS score threshold (-22.75)	67	88.47		Mmp12
EKDVDGLDRTAGAIRG	Q3MHM6	532	547	C-terminus	Mmp13 (P23097; MMP13_RAT). Mmp13 (P33435; MMP13_MOUSE). MMP13 (P45452; MMP13_HUMAN)	AIRGRAAR	MEROPS:M10.013	Endopeptidase (input)	-21.85	MEROPS score threshold (-23.33)	70	93.66		Mmp13
EKDVDGLDRTAGAIRG	Q3MHM6	532	547	C-terminus	MMP14 (P50281; MMP14_HUMAN). Mmp14 (P53690; MMP14_MOUSE). Mmp14 (Q10739; MMP14_RAT)	AIRGRAAR	MEROPS:M10.014	Endopeptidase (input)	-22.24	MEROPS score threshold (-22.96)	75	80.66		MMP14
GAGERPLRLNAAAR	Q3T0E1	47	60	N-terminus	Mmp12 (P34960; MMP12_MOUSE). MMP12 (P39900; MMP12_HUMAN). Mmp12 (Q63341; MMP12_RAT)	DGPGGAGE	MEROPS:M10.009	Endopeptidase (input)	-20.11	MEROPS score threshold (-22.75)	67	88.47		Mmp12
GAGERPLRLNAAAR	Q3T0E1	47	60	N-terminus	Mmp13 (P23097; MMP13_RAT). Mmp13 (P33435; MMP13_MOUSE). MMP13 (P45452; MMP13_HUMAN)	DGPGGAGE	MEROPS:M10.013	Endopeptidase (input)	-20.59	MEROPS score threshold (-23.33)	70	93.66		Mmp13
GAGERPLRLNAAAR	Q3T0E1	47	60	N-terminus	MMP14 (P50281; MMP14_HUMAN). Mmp14 (P53690; MMP14_MOUSE). Mmp14 (Q10739; MMP14_RAT)	DGPGGAGE	MEROPS:M10.014	Endopeptidase (input)	-20.28	MEROPS score threshold (-22.96)	75	80.66		MMP14
GAGERPLRLNAAAR	Q3T0E1	47	60	C-terminus	Mmp12 (P34960; MMP12_MOUSE). MMP12 (P39900; MMP12_HUMAN). Mmp12 (Q63341; MMP12_RAT)	AAARSRGR	MEROPS:M10.009	Endopeptidase (input)	-19.93	MEROPS score threshold (-22.75)	67	88.47		Mmp12
GAGERPLRLNAAAR	Q3T0E1	47	60	C-terminus	Mmp13 (P23097; MMP13_RAT). Mmp13 (P33435; MMP13_MOUSE). MMP13 (P45452; MMP13_HUMAN)	AAARSRGR	MEROPS:M10.013	Endopeptidase (input)	-20.19	MEROPS score threshold (-23.33)	70	93.66		Mmp13
GAGERPLRLNAAAR	Q3T0E1	47	60	C-terminus	MMP14 (P50281; MMP14_HUMAN). Mmp14 (P53690; MMP14_MOUSE). Mmp14 (Q10739; MMP14_RAT)	AAARSRGR	MEROPS:M10.014	Endopeptidase (input)	-19.26	MEROPS score threshold (-22.96)	75	80.66		MMP14
FLPEGSKLVPVAKV	Q3T063	74	87	C-terminus	Mmp12 (P34960; MMP12_MOUSE). MMP12 (P39900; MMP12_HUMAN). Mmp12 (Q63341; MMP12_RAT)	VAKVAEVR	MEROPS:M10.009	Endopeptidase (input)	-22.09	MEROPS score threshold (-22.75)	67	88.47		Mmp12
TAVNKRTANVSAGGGGAQ	Q3B7M6	319	336	C-terminus	Mmp12 (P34960; MMP12_MOUSE). MMP12 (P39900; MMP12_HUMAN). Mmp12 (Q63341; MMP12_RAT)	GGAQNPGV	MEROPS:M10.009	Endopeptidase (input)	-20.96	MEROPS score threshold (-22.75)	67	88.47		Mmp12
TAVNKRTANVSAGGGGAQ	Q3B7M6	319	336	C-terminus	Mmp13 (P23097; MMP13_RAT). Mmp13 (P33435; MMP13_MOUSE). MMP13 (P45452; MMP13_HUMAN)	GGAQNPGV	MEROPS:M10.013	Endopeptidase (input)	-23.22	MEROPS score threshold (-23.33)	70	93.66		Mmp13
TAVNKRTANVSAGGGGAQ	Q3B7M6	319	336	C-terminus	MMP14 (P50281; MMP14_HUMAN). Mmp14 (P53690; MMP14_MOUSE). Mmp14 (Q10739; MMP14_RAT)	GGAQNPGV	MEROPS:M10.014	Endopeptidase (input)	-22.29	MEROPS score threshold (-22.96)	75	80.66		MMP14
GSGPDGPLGVEQSGKTDQ	Q3MHH2	16	33	N-terminus	Mmp12 (P34960; MMP12_MOUSE). MMP12 (P39900; MMP12_HUMAN). Mmp12 (Q63341; MMP12_RAT)	AVPLGSGP	MEROPS:M10.009	Endopeptidase (input)	-21.36	MEROPS score threshold (-22.75)	67	88.47		Mmp12
GSGPDGPLGVEQSGKTDQ	Q3MHH2	16	33	N-terminus	Mmp13 (P23097; MMP13_RAT). Mmp13 (P33435; MMP13_MOUSE). MMP13 (P45452; MMP13_HUMAN)	AVPLGSGP	MEROPS:M10.013	Endopeptidase (input)	-23.33	MEROPS score threshold (-23.33)	70	93.66		Mmp13
GSGPDGPLGVEQSGKTDQ	Q3MHH2	16	33	N-terminus	MMP14 (P50281; MMP14_HUMAN). Mmp14 (P53690; MMP14_MOUSE). Mmp14 (Q10739; MMP14_RAT)	AVPLGSGP	MEROPS:M10.014	Endopeptidase (input)	-22.88	MEROPS score threshold (-22.96)	75	80.66		MMP14
QVALENANAVSEGVVHEDL	Q3SZ63	58	76	N-terminus	Mmp13 (P23097; MMP13_RAT). Mmp13 (P33435; MMP13_MOUSE). MMP13 (P45452; MMP13_HUMAN)	FSSSQVAL	MEROPS:M10.013	Endopeptidase (input)	-23.27	MEROPS score threshold (-23.33)	70	93.66		Mmp13
QVALENANAVSEGVVHEDL	Q3SZ63	58	76	N-terminus	MMP14 (P50281; MMP14_HUMAN). Mmp14 (P53690; MMP14_MOUSE). Mmp14 (Q10739; MMP14_RAT)	FSSSQVAL	MEROPS:M10.014	Endopeptidase (input)	-21.57	MEROPS score threshold (-22.96)	75	80.66		MMP14
DLPDGGHLTHGYMSDVKR	Q3SZ20	165	182	C-terminus	Mmp13 (P23097; MMP13_RAT). Mmp13 (P33435; MMP13_MOUSE). MMP13 (P45452; MMP13_HUMAN)	DVKRISAT	MEROPS:M10.013	Endopeptidase (input)	-21.68	MEROPS score threshold (-23.33)	70	93.66		Mmp13
DLPDGGHLTHGYMSDVKR	Q3SZ20	165	182	C-terminus	MMP14 (P50281; MMP14_HUMAN). Mmp14 (P53690; MMP14_MOUSE). Mmp14 (Q10739; MMP14_RAT)	DVKRISAT	MEROPS:M10.014	Endopeptidase (input)	-20.53	MEROPS score threshold (-22.96)	75	80.66		MMP14
QNLRGQSSDQS	Q3SZX7	108	118	N-terminus	MMP14 (P50281; MMP14_HUMAN). Mmp14 (P53690; MMP14_MOUSE). Mmp14 (Q10739; MMP14_RAT)	GIQAQNLR	MEROPS:M10.014	Endopeptidase (input)	-20.7	MEROPS score threshold (-22.96)	75	80.66		MMP14
TGSRFGLGDKVRYRC	Q3SYW2	163	177	N-terminus	Mmp12 (P34960; MMP12_MOUSE). MMP12 (P39900; MMP12_HUMAN). Mmp12 (Q63341; MMP12_RAT)	GAVRTGSR	MEROPS:M10.009	Endopeptidase (input)	-21.95	MEROPS score threshold (-22.75)	67	88.47		Mmp12
TGSRFGLGDKVRYRC	Q3SYW2	163	177	N-terminus	MMP14 (P50281; MMP14_HUMAN). Mmp14 (P53690; MMP14_MOUSE). Mmp14 (Q10739; MMP14_RAT)	GAVRTGSR	MEROPS:M10.014	Endopeptidase (input)	-21.62	MEROPS score threshold (-22.96)	75	80.66		MMP14
GYGDVGKGCAQALR	Q3MHL4	220	233	N-terminus	Mmp12 (P34960; MMP12_MOUSE). MMP12 (P39900; MMP12_HUMAN). Mmp12 (Q63341; MMP12_RAT)	AVVAGYGD	MEROPS:M10.009	Endopeptidase (input)	-22.46	MEROPS score threshold (-22.75)	67	88.47		Mmp12
GYGDVGKGCAQALR	Q3MHL4	220	233	N-terminus	MMP14 (P50281; MMP14_HUMAN). Mmp14 (P53690; MMP14_MOUSE). Mmp14 (Q10739; MMP14_RAT)	AVVAGYGD	MEROPS:M10.014	Endopeptidase (input)	-22.53	MEROPS score threshold (-22.96)	75	80.66		MMP14
GYGDVGKGCAQALR	Q3MHL4	220	233	C-terminus	Mmp12 (P34960; MMP12_MOUSE). MMP12 (P39900; MMP12_HUMAN). Mmp12 (Q63341; MMP12_RAT)	QALRGFGA	MEROPS:M10.009	Endopeptidase (input)	-21.34	MEROPS score threshold (-22.75)	67	88.47		Mmp12
GYGDVGKGCAQALR	Q3MHL4	220	233	C-terminus	Mmp13 (P23097; MMP13_RAT). Mmp13 (P33435; MMP13_MOUSE). MMP13 (P45452; MMP13_HUMAN)	QALRGFGA	MEROPS:M10.013	Endopeptidase (input)	-22.64	MEROPS score threshold (-23.33)	70	93.66		Mmp13
GYGDVGKGCAQALR	Q3MHL4	220	233	C-terminus	MMP14 (P50281; MMP14_HUMAN). Mmp14 (P53690; MMP14_MOUSE). Mmp14 (Q10739; MMP14_RAT)	QALRGFGA	MEROPS:M10.014	Endopeptidase (input)	-20.54	MEROPS score threshold (-22.96)	75	80.66		MMP14
WWSDLYSEMMTSLGK	Q3MHH1	220	234	C-terminus	MMP14 (P50281; MMP14_HUMAN). Mmp14 (P53690; MMP14_MOUSE). Mmp14 (Q10739; MMP14_RAT)	SLGKSQEE	MEROPS:M10.014	Endopeptidase (input)	-19.88	MEROPS score threshold (-22.96)	75	80.66		MMP14
SAADAQAIADMAAYQLEL	Q3SZC2	68	85	N-terminus	Mmp12 (P34960; MMP12_MOUSE). MMP12 (P39900; MMP12_HUMAN). Mmp12 (Q63341; MMP12_RAT)	ALSGSAAD	MEROPS:M10.009	Endopeptidase (input)	-20.16	MEROPS score threshold (-22.75)	67	88.47		Mmp12
SAADAQAIADMAAYQLEL	Q3SZC2	68	85	N-terminus	Mmp13 (P23097; MMP13_RAT). Mmp13 (P33435; MMP13_MOUSE). MMP13 (P45452; MMP13_HUMAN)	ALSGSAAD	MEROPS:M10.013	Endopeptidase (input)	-19.58	MEROPS score threshold (-23.33)	70	93.66		Mmp13
SAADAQAIADMAAYQLEL	Q3SZC2	68	85	N-terminus	MMP14 (P50281; MMP14_HUMAN). Mmp14 (P53690; MMP14_MOUSE). Mmp14 (Q10739; MMP14_RAT)	ALSGSAAD	MEROPS:M10.014	Endopeptidase (input)	-20.16	MEROPS score threshold (-22.96)	75	80.66		MMP14
LRPGQPGLPPFL	Q3SX44	223	234	C-terminus	Mmp12 (P34960; MMP12_MOUSE). MMP12 (P39900; MMP12_HUMAN). Mmp12 (Q63341; MMP12_RAT)	PPFLLHRG	MEROPS:M10.009	Endopeptidase (input)	-21.67	MEROPS score threshold (-22.75)	67	88.47		Mmp12
LRPGQPGLPPFL	Q3SX44	223	234	C-terminus	MMP14 (P50281; MMP14_HUMAN). Mmp14 (P53690; MMP14_MOUSE). Mmp14 (Q10739; MMP14_RAT)	PPFLLHRG	MEROPS:M10.014	Endopeptidase (input)	-22.31	MEROPS score threshold (-22.96)	75	80.66		MMP14
LASGEGAAAGLPALD	Q3SX44	23	37	N-terminus	Mmp12 (P34960; MMP12_MOUSE). MMP12 (P39900; MMP12_HUMAN). Mmp12 (Q63341; MMP12_RAT)	VPESLASG	MEROPS:M10.009	Endopeptidase (input)	-17.88	MEROPS score threshold (-22.75)	67	88.47		Mmp12
LASGEGAAAGLPALD	Q3SX44	23	37	N-terminus	Mmp13 (P23097; MMP13_RAT). Mmp13 (P33435; MMP13_MOUSE). MMP13 (P45452; MMP13_HUMAN)	VPESLASG	MEROPS:M10.013	Endopeptidase (input)	-19.85	MEROPS score threshold (-23.33)	70	93.66		Mmp13
LASGEGAAAGLPALD	Q3SX44	23	37	N-terminus	MMP14 (P50281; MMP14_HUMAN). Mmp14 (P53690; MMP14_MOUSE). Mmp14 (Q10739; MMP14_RAT)	VPESLASG	MEROPS:M10.014	Endopeptidase (input)	-18.17	MEROPS score threshold (-22.96)	75	80.66		MMP14
LASGEGAAAGLPALD	Q3SX44	23	37	C-terminus	Mmp12 (P34960; MMP12_MOUSE). MMP12 (P39900; MMP12_HUMAN). Mmp12 (Q63341; MMP12_RAT)	PALDLAKA	MEROPS:M10.009	Endopeptidase (input)	-19.2	MEROPS score threshold (-22.75)	67	88.47		Mmp12
LASGEGAAAGLPALD	Q3SX44	23	37	C-terminus	Mmp13 (P23097; MMP13_RAT). Mmp13 (P33435; MMP13_MOUSE). MMP13 (P45452; MMP13_HUMAN)	PALDLAKA	MEROPS:M10.013	Endopeptidase (input)	-22.78	MEROPS score threshold (-23.33)	70	93.66		Mmp13
LASGEGAAAGLPALD	Q3SX44	23	37	C-terminus	MMP14 (P50281; MMP14_HUMAN). Mmp14 (P53690; MMP14_MOUSE). Mmp14 (Q10739; MMP14_RAT)	PALDLAKA	MEROPS:M10.014	Endopeptidase (input)	-20.33	MEROPS score threshold (-22.96)	75	80.66		MMP14
LIPMIGFIGLGMGSAALYL	Q3SZ44	20	38	C-terminus	Mmp12 (P34960; MMP12_MOUSE). MMP12 (P39900; MMP12_HUMAN). Mmp12 (Q63341; MMP12_RAT)	ALYLLRLA	MEROPS:M10.009	Endopeptidase (input)	-20.13	MEROPS score threshold (-22.75)	67	88.47		Mmp12
LIPMIGFIGLGMGSAALYL	Q3SZ44	20	38	C-terminus	MMP14 (P50281; MMP14_HUMAN). Mmp14 (P53690; MMP14_MOUSE). Mmp14 (Q10739; MMP14_RAT)	ALYLLRLA	MEROPS:M10.014	Endopeptidase (input)	-21.06	MEROPS score threshold (-22.96)	75	80.66		MMP14
DAQHESGQSSS	Q3T013	77	87	C-terminus	MMP14 (P50281; MMP14_HUMAN). Mmp14 (P53690; MMP14_MOUSE). Mmp14 (Q10739; MMP14_RAT)	QSSSRGSS	MEROPS:M10.014	Endopeptidase (input)	-22.23	MEROPS score threshold (-22.96)	75	80.66		MMP14
GPCSAGAPALGGRREPKK	Q3SYZ2	21	38	C-terminus	Mmp12 (P34960; MMP12_MOUSE). MMP12 (P39900; MMP12_HUMAN). Mmp12 (Q63341; MMP12_RAT)	EPKKYAVT	MEROPS:M10.009	Endopeptidase (input)	-21.18	MEROPS score threshold (-22.75)	67	88.47		Mmp12
GPCSAGAPALGGRREPKK	Q3SYZ2	21	38	C-terminus	Mmp13 (P23097; MMP13_RAT). Mmp13 (P33435; MMP13_MOUSE). MMP13 (P45452; MMP13_HUMAN)	EPKKYAVT	MEROPS:M10.013	Endopeptidase (input)	-21.53	MEROPS score threshold (-23.33)	70	93.66		Mmp13
GPCSAGAPALGGRREPKK	Q3SYZ2	21	38	C-terminus	MMP14 (P50281; MMP14_HUMAN). Mmp14 (P53690; MMP14_MOUSE). Mmp14 (Q10739; MMP14_RAT)	EPKKYAVT	MEROPS:M10.014	Endopeptidase (input)	-21.89	MEROPS score threshold (-22.96)	75	80.66		MMP14
KRYNQNRSLVQKLRMEER	Q3SZM1	147	164	N-terminus	Mmp12 (P34960; MMP12_MOUSE). MMP12 (P39900; MMP12_HUMAN). Mmp12 (Q63341; MMP12_RAT)	YPAVKRYN	MEROPS:M10.009	Endopeptidase (input)	-22.41	MEROPS score threshold (-22.75)	67	88.47		Mmp12
FRSPAAPSPLALRQ	Q3MHV6	461	474	N-terminus	Mmp12 (P34960; MMP12_MOUSE). MMP12 (P39900; MMP12_HUMAN). Mmp12 (Q63341; MMP12_RAT)	SPGKFRSP	MEROPS:M10.009	Endopeptidase (input)	-20.17	MEROPS score threshold (-22.75)	67	88.47		Mmp12
FRSPAAPSPLALRQ	Q3MHV6	461	474	N-terminus	Mmp13 (P23097; MMP13_RAT). Mmp13 (P33435; MMP13_MOUSE). MMP13 (P45452; MMP13_HUMAN)	SPGKFRSP	MEROPS:M10.013	Endopeptidase (input)	-20.04	MEROPS score threshold (-23.33)	70	93.66		Mmp13
FRSPAAPSPLALRQ	Q3MHV6	461	474	N-terminus	MMP14 (P50281; MMP14_HUMAN). Mmp14 (P53690; MMP14_MOUSE). Mmp14 (Q10739; MMP14_RAT)	SPGKFRSP	MEROPS:M10.014	Endopeptidase (input)	-20.04	MEROPS score threshold (-22.96)	75	80.66		MMP14
VSFHMEYSCGTAAIRG	Q3MHZ2	124	139	C-terminus	Mmp13 (P23097; MMP13_RAT). Mmp13 (P33435; MMP13_MOUSE). MMP13 (P45452; MMP13_HUMAN)	AIRGTKEL	MEROPS:M10.013	Endopeptidase (input)	-21.18	MEROPS score threshold (-23.33)	70	93.66		Mmp13
VSFHMEYSCGTAAIRG	Q3MHZ2	124	139	C-terminus	MMP14 (P50281; MMP14_HUMAN). Mmp14 (P53690; MMP14_MOUSE). Mmp14 (Q10739; MMP14_RAT)	AIRGTKEL	MEROPS:M10.014	Endopeptidase (input)	-21.83	MEROPS score threshold (-22.96)	75	80.66		MMP14
LLLQDFSRNLSAKSSAL	Q3SZ87	15	31	N-terminus	MMP14 (P50281; MMP14_HUMAN). Mmp14 (P53690; MMP14_MOUSE). Mmp14 (Q10739; MMP14_RAT)	SEEDLLLQ	MEROPS:M10.014	Endopeptidase (input)	-22.04	MEROPS score threshold (-22.96)	75	80.66		MMP14
LLLQDFSRNLSAKSSAL	Q3SZ87	15	31	C-terminus	MMP14 (P50281; MMP14_HUMAN). Mmp14 (P53690; MMP14_MOUSE). Mmp14 (Q10739; MMP14_RAT)	SSALFFGN	MEROPS:M10.014	Endopeptidase (input)	-22.56	MEROPS score threshold (-22.96)	75	80.66		MMP14
QSPAAGAPKVLLLSG	Q3SZZ2	8	22	N-terminus	Mmp12 (P34960; MMP12_MOUSE). MMP12 (P39900; MMP12_HUMAN). Mmp12 (Q63341; MMP12_RAT)	VAPAQSPA	MEROPS:M10.009	Endopeptidase (input)	-19.25	MEROPS score threshold (-22.75)	67	88.47		Mmp12
QSPAAGAPKVLLLSG	Q3SZZ2	8	22	N-terminus	MMP14 (P50281; MMP14_HUMAN). Mmp14 (P53690; MMP14_MOUSE). Mmp14 (Q10739; MMP14_RAT)	VAPAQSPA	MEROPS:M10.014	Endopeptidase (input)	-22.08	MEROPS score threshold (-22.96)	75	80.66		MMP14
QSPAAGAPKVLLLSG	Q3SZZ2	8	22	C-terminus	Mmp12 (P34960; MMP12_MOUSE). MMP12 (P39900; MMP12_HUMAN). Mmp12 (Q63341; MMP12_RAT)	LLSGQPAA	MEROPS:M10.009	Endopeptidase (input)	-20	MEROPS score threshold (-22.75)	67	88.47		Mmp12
QSPAAGAPKVLLLSG	Q3SZZ2	8	22	C-terminus	Mmp13 (P23097; MMP13_RAT). Mmp13 (P33435; MMP13_MOUSE). MMP13 (P45452; MMP13_HUMAN)	LLSGQPAA	MEROPS:M10.013	Endopeptidase (input)	-20.51	MEROPS score threshold (-23.33)	70	93.66		Mmp13
QSPAAGAPKVLLLSG	Q3SZZ2	8	22	C-terminus	MMP14 (P50281; MMP14_HUMAN). Mmp14 (P53690; MMP14_MOUSE). Mmp14 (Q10739; MMP14_RAT)	LLSGQPAA	MEROPS:M10.014	Endopeptidase (input)	-19.27	MEROPS score threshold (-22.96)	75	80.66		MMP14
TPPFSSSCGVLGTG	Q3MHZ4	71	84	N-terminus	Mmp12 (P34960; MMP12_MOUSE). MMP12 (P39900; MMP12_HUMAN). Mmp12 (Q63341; MMP12_RAT)	AAPATPPF	MEROPS:M10.009	Endopeptidase (input)	-22.25	MEROPS score threshold (-22.75)	67	88.47		Mmp12
RVPEDLFTGLKVTDPQE	Q3ZBR5	8	24	C-terminus	MMP14 (P50281; MMP14_HUMAN). Mmp14 (P53690; MMP14_MOUSE). Mmp14 (Q10739; MMP14_RAT)	DPQEAECL	MEROPS:M10.014	Endopeptidase (input)	-22.29	MEROPS score threshold (-22.96)	75	80.66		MMP14
LSAGENVLPSTMQPGDD	Q58DA4	141	157	N-terminus	MMP14 (P50281; MMP14_HUMAN). Mmp14 (P53690; MMP14_MOUSE). Mmp14 (Q10739; MMP14_RAT)	FFVSLSAG	MEROPS:M10.014	Endopeptidase (input)	-21.69	MEROPS score threshold (-22.96)	75	80.66		MMP14
LLRGEVVPASSEARKK	Q3ZC80	258	273	N-terminus	Mmp12 (P34960; MMP12_MOUSE). MMP12 (P39900; MMP12_HUMAN). Mmp12 (Q63341; MMP12_RAT)	AVYGLLRG	MEROPS:M10.009	Endopeptidase (input)	-19.56	MEROPS score threshold (-22.75)	67	88.47		Mmp12
LLRGEVVPASSEARKK	Q3ZC80	258	273	N-terminus	Mmp13 (P23097; MMP13_RAT). Mmp13 (P33435; MMP13_MOUSE). MMP13 (P45452; MMP13_HUMAN)	AVYGLLRG	MEROPS:M10.013	Endopeptidase (input)	-21.93	MEROPS score threshold (-23.33)	70	93.66		Mmp13
LLRGEVVPASSEARKK	Q3ZC80	258	273	N-terminus	MMP14 (P50281; MMP14_HUMAN). Mmp14 (P53690; MMP14_MOUSE). Mmp14 (Q10739; MMP14_RAT)	AVYGLLRG	MEROPS:M10.014	Endopeptidase (input)	-19.97	MEROPS score threshold (-22.96)	75	80.66		MMP14
LLRGEVVPASSEARKK	Q3ZC80	258	273	C-terminus	Mmp12 (P34960; MMP12_MOUSE). MMP12 (P39900; MMP12_HUMAN). Mmp12 (Q63341; MMP12_RAT)	ARKKVRGV	MEROPS:M10.009	Endopeptidase (input)	-21.69	MEROPS score threshold (-22.75)	67	88.47		Mmp12
LLRGEVVPASSEARKK	Q3ZC80	258	273	C-terminus	Mmp13 (P23097; MMP13_RAT). Mmp13 (P33435; MMP13_MOUSE). MMP13 (P45452; MMP13_HUMAN)	ARKKVRGV	MEROPS:M10.013	Endopeptidase (input)	-21.42	MEROPS score threshold (-23.33)	70	93.66		Mmp13
VYSVVLAAGLPLNALA	Q3ZC80	27	42	C-terminus	Mmp12 (P34960; MMP12_MOUSE). MMP12 (P39900; MMP12_HUMAN). Mmp12 (Q63341; MMP12_RAT)	NALALWVF	MEROPS:M10.009	Endopeptidase (input)	-21.64	MEROPS score threshold (-22.75)	67	88.47		Mmp12
VYSVVLAAGLPLNALA	Q3ZC80	27	42	C-terminus	Mmp13 (P23097; MMP13_RAT). Mmp13 (P33435; MMP13_MOUSE). MMP13 (P45452; MMP13_HUMAN)	NALALWVF	MEROPS:M10.013	Endopeptidase (input)	-22.85	MEROPS score threshold (-23.33)	70	93.66		Mmp13
VYSVVLAAGLPLNALA	Q3ZC80	27	42	C-terminus	MMP14 (P50281; MMP14_HUMAN). Mmp14 (P53690; MMP14_MOUSE). Mmp14 (Q10739; MMP14_RAT)	NALALWVF	MEROPS:M10.014	Endopeptidase (input)	-21.43	MEROPS score threshold (-22.96)	75	80.66		MMP14
QLHTLDTDLHSLAQIGGKS	Q5BIM2	182	200	N-terminus	Mmp12 (P34960; MMP12_MOUSE). MMP12 (P39900; MMP12_HUMAN). Mmp12 (Q63341; MMP12_RAT)	APPGQLHT	MEROPS:M10.009	Endopeptidase (input)	-22.27	MEROPS score threshold (-22.75)	67	88.47		Mmp12
QLHTLDTDLHSLAQIGGKS	Q5BIM2	182	200	N-terminus	Mmp13 (P23097; MMP13_RAT). Mmp13 (P33435; MMP13_MOUSE). MMP13 (P45452; MMP13_HUMAN)	APPGQLHT	MEROPS:M10.013	Endopeptidase (input)	-19.72	MEROPS score threshold (-23.33)	70	93.66		Mmp13
QLHTLDTDLHSLAQIGGKS	Q5BIM2	182	200	N-terminus	MMP14 (P50281; MMP14_HUMAN). Mmp14 (P53690; MMP14_MOUSE). Mmp14 (Q10739; MMP14_RAT)	APPGQLHT	MEROPS:M10.014	Endopeptidase (input)	-21.23	MEROPS score threshold (-22.96)	75	80.66		MMP14
QLHTLDTDLHSLAQIGGKS	Q5BIM2	182	200	C-terminus	Mmp12 (P34960; MMP12_MOUSE). MMP12 (P39900; MMP12_HUMAN). Mmp12 (Q63341; MMP12_RAT)	GGKSLVSG	MEROPS:M10.009	Endopeptidase (input)	-18.29	MEROPS score threshold (-22.75)	67	88.47		Mmp12
QLHTLDTDLHSLAQIGGKS	Q5BIM2	182	200	C-terminus	Mmp13 (P23097; MMP13_RAT). Mmp13 (P33435; MMP13_MOUSE). MMP13 (P45452; MMP13_HUMAN)	GGKSLVSG	MEROPS:M10.013	Endopeptidase (input)	-18.79	MEROPS score threshold (-23.33)	70	93.66		Mmp13
QLHTLDTDLHSLAQIGGKS	Q5BIM2	182	200	C-terminus	MMP14 (P50281; MMP14_HUMAN). Mmp14 (P53690; MMP14_MOUSE). Mmp14 (Q10739; MMP14_RAT)	GGKSLVSG	MEROPS:M10.014	Endopeptidase (input)	-19.29	MEROPS score threshold (-22.96)	75	80.66		MMP14
CYGALAAIPGLRPIHPSG	Q58CZ9	346	363	C-terminus	Mmp13 (P23097; MMP13_RAT). Mmp13 (P33435; MMP13_MOUSE). MMP13 (P45452; MMP13_HUMAN)	HPSGAMYL	MEROPS:M10.013	Endopeptidase (input)	-20.36	MEROPS score threshold (-23.33)	70	93.66		Mmp13
GLKGGGVCFNSQPSS	Q3ZBG8	119	133	C-terminus	MMP14 (P50281; MMP14_HUMAN). Mmp14 (P53690; MMP14_MOUSE). Mmp14 (Q10739; MMP14_RAT)	QPSSETEK	MEROPS:M10.014	Endopeptidase (input)	-22.38	MEROPS score threshold (-22.96)	75	80.66		MMP14
EALSVAKMQVEMGA	Q4JIJ3	397	410	C-terminus	MMP14 (P50281; MMP14_HUMAN). Mmp14 (P53690; MMP14_MOUSE). Mmp14 (Q10739; MMP14_RAT)	EMGAQVLD	MEROPS:M10.014	Endopeptidase (input)	-22.86	MEROPS score threshold (-22.96)	75	80.66		MMP14
VNITLRILFRPVASQLPR	Q3T165	88	105	N-terminus	MMP14 (P50281; MMP14_HUMAN). Mmp14 (P53690; MMP14_MOUSE). Mmp14 (Q10739; MMP14_RAT)	DLQNVNIT	MEROPS:M10.014	Endopeptidase (input)	-22.56	MEROPS score threshold (-22.96)	75	80.66		MMP14
VNITLRILFRPVASQLPR	Q3T165	88	105	C-terminus	MMP14 (P50281; MMP14_HUMAN). Mmp14 (P53690; MMP14_MOUSE). Mmp14 (Q10739; MMP14_RAT)	QLPRIFTS	MEROPS:M10.014	Endopeptidase (input)	-20.6	MEROPS score threshold (-22.96)	75	80.66		MMP14
[truncated: 2,238 more rows]

## Sheet: LACTATION
Peptide ID	Parent Protein AC from input	Start amino acid	End amino acid	N or C-terminus	Protease Human/Mouse/Rat	Cleavage site	Source	Plausible proteolysis	Probability Calculated	Threshold applied (value)	Sensitivity	Specificity
[truncated: 3,562 more rows]

[truncated: 3 more sheets: PREGNANT, Manual curation, REFINED PROTEASIX DATA]
