# Supplementary material for: Peptide profiling in cow urine reveals molecular signature of physiology-driven pathways and in-silico predicted bioactive properties
Source: Sci Rep. 2021 Jun 14;11:12427. doi: 10.1038/s41598-021-91684-4 (PMC8203733; doi:10.1038/s41598-021-91684-4)
Supplement: Supplementary file 4 — Supplementary Information. [file 41598_2021_91684_MOESM4_ESM.xlsx]

## Sheet: cover
		Comprehensive profiling of urinary peptides in cow reveals physiology specific signatures and several bioactive properties
		Rohit Kumar, Syed Azmal Ali, Sumit Kumar Singh, Vanya Bhushan, Jai Kumar Kaushik, Ashok Kumar Mohanty, and Sudarshan Kumar
		Supplementary table 4: Functional annotation

## Sheet: Functional annotaion_heifer
Category	Term	Count	%	PValue	Genes	List Total	Pop Hits	Pop Total	Fold Enrichment	Bonferroni	Benjamini	FDR
UP_KEYWORDS	Coiled coil	378	19.5652	5.14046e-20	A7Z017, F1MNV8, E1BJE1, F1N4J1, F1N3U6, E1BGE2, A3KN07, F1N264, E1BC41, F1N469, E1B9R5, F1MD64, F1MM72, E1BBS9, F1MBL6, Q3B7M7, F1MG71, F1MDH3, E1BND2, F1N0Y1, Q2HJ91, G3MZJ5, F1MXE2, E1BNU3, F1MTK5, F1MF78, F1MPV5, A4IFP2, A7MBK1, A7MB96, A5PKJ6, E1BL71, A5PKJ3, F1MD77, E1BBT9, F1MRD8, E1B9B0, F1MQI1, G5E556, G3X7Z2, F1N1E0, E1B7E2, E1B7E3, F1MFW9, F1MGT1, F1MXF5, F1MH50, F1MPW8, P35605, A6QLQ3,…	1884	2319	17808	1.54073	1.69635e-17	1.69635e-17	6.96898e-17
INTERPRO	IPR016024:Armadillo-type fold	90	4.65839	1.77055e-18	A7YY22, E1BC85, F1MKS6, E1B7K5, F1MF64, F1MVD5, A7MBJ5, P49951, G5E630, E1BGE2, A6QM02, F1MFZ5, Q3ZBE1, E1B847, F1N463, F1MBL6, E1BN24, E1BE82, E1B8S1, Q865S1, E1BND2, A7MB67, E1BPB3, F1MJP6, E1BPI7, E1BPV1, E1B7C4, G3X6R3, E1B717, F1MI29, F1MZA7, E1BNY9, F1MX04, F1MDR7, E1BM39, E1BP38, A5D7C4, E1BNR0, E1BE98, A7E2Y6, E1B9B0, A6QPT0, E1BMG8, E1BH40, E1BE66, E1BK00, F1MPS0, E1BM83, F1MKU0, E1BPS4,…	1806	314	16802	2.66659	4.06342e-15	4.06342e-15	3.09304e-15
INTERPRO	IPR011989:Armadillo-like helical	55	2.84679	3.94858e-11	A7YY22, F1MKS6, E1B7K5, F1MVD5, A7MBJ5, E1BGE2, F1MFZ5, Q3ZBE1, F1MBL6, E1BE82, Q865S1, A7MB67, E1BND2, F1MJP6, E1BPI7, E1BPV1, E1B717, F1MI29, F1MDR7, E1BM39, A5D7C4, E1BE98, A7E2Y6, F1MPS0, E1BM83, F1MKU0, E1BNT2, F1N2L5, F1MLY7, E1B7Q7, F1MZT7, A7MBA2, E1BFB4, E1BG09, Q5E9J8, E1BB26, Q0VCX4, E1BKC4, E1BGU0, Q0VCK5, E1BJF6, E1BQ15, E1BDV4, Q3B7M3, F1N3G4, E1BKJ5, Q08DS7, E1BLB6, F1N7G8, G3N0D2,…	1806	196	16802	2.61066	9.062e-08	4.531e-08	6.89793e-08
GOTERM_CC_DIRECT	GO:0005654~nucleoplasm	209	10.8178	8.29885e-10	E1BJE9, A7Z018, E1B7V9, Q1LZ90, F1MPE9, A7MBJ5, Q865V6, F1N264, F1N469, F1N463, F1MNE1, Q3B7M6, F1MIV1, E1B885, F1N0Y1, E1BAT5, F1N0Y9, F1N1V3, F1N4I0, E1B8H0, A5D7K6, G3MX91, F1N4Z5, E1BJV8, E1B7E3, E1BFC2, F1MGT1, E1B7X9, A5PK74, Q3SZD1, F1N281, P09867, F1MTI9, E1BHK2, A6QR44, Q1LZF1, F1MT98, E1BNS3, F1N3G4, E1BL90, P27925, F1MP88, F1MWC0, F1MHF3, P00727, F1MX61, F1N7Q0, A6QQ10, F1MYK3, G3MXV0,…	1648	1310	15461	1.49677	5.59342e-07	5.59342e-07	1.24518e-06
INTERPRO	IPR008160:Collagen triple helix repeat	27	1.39752	2.87431e-08	A4FV05, F1N2Y2, A7YY40, F1MJQ6, F1MTP1, F1MSJ7, P02453, A5PJQ2, Q32S24, A6QPB3, G3MXE4, P02459, E1BI98, F1MZU6, E1BLS8, F6R9Y9, E1B7H2, E1BB91, E1BN05, E1BPV7, A7E303, F1MDC2, F1N7Q7, E1BCT7, A5PJL8, F1MJY9, P23206	1806	75	16802	3.34924	6.59632e-05	2.19882e-05	5.02123e-05
INTERPRO	IPR001881:EGF-like calcium-binding	34	1.75983	3.23259e-08	Q2KIT5, E1BDN7, F1MYW1, Q28019, F1MPE9, E1BPS6, P48733, E1BGE0, G3X812, G3X6N5, E1B949, F1MN54, F1MLJ7, E1BL59, A4FV93, F1MXE0, F1MKV7, F1MC84, F1MSI2, E1BE11, E1BNJ1, G3N1F4, F1N2V0, E1BGJ0, F1N444, E1B9K4, F1N6H1, F1MHH5, F1N6Y9, E1BJ11, Q5E9P5, F1MER7, F1MZD0, F1MNH3	1806	111	16802	2.8497	7.41852e-05	1.85468e-05	5.64713e-05
INTERPRO	IPR011993:Pleckstrin homology-like domain	77	3.98551	7.16671e-08	F1MDV3, F1MNV2, F1MF64, G3MZZ8, F1MLR9, F1MBT5, O97902, F1N657, F1MYE0, G5E5Q8, A6QLS6, E1BHX7, F1MM72, E1BNH5, F1MJV1, F1MDH3, A4IFL7, F1MLJ5, F1N1Q7, F1MQ30, E1BPM7, E1B7C4, F1N6I9, E1B716, E1BMD4, F1MZA2, Q29RM4, A7MB96, F1MUS9, P10895, P10894, F1MGG8, F1MRH8, E1BCP6, F1MSU8, G5E5L9, F1MQI1, F1MQ44, E1BEL4, F1MIM9, E1BNT8, F1MH50, Q1KZG5, A7Z032, F1MJE0, E1BJC1, E1BPA1, F1MRW6, F1MYC9, A6QPQ3,…	1806	382	16802	1.8753	0.000164463	3.28947e-05	0.000125198
GOTERM_MF_DIRECT	GO:0003682~chromatin binding	66	3.41615	7.82797e-08	A7Z018, F1N616, F1MGR9, A7MBB7, E1BGA4, A4IFD2, F1MGR3, F1N264, Q2NKY8, Q8SQ19, Q3B7M7, A4FV76, E1BNH8, E1BKA3, F1MZE3, Q2KHY5, F1MMF1, E1BQ37, F1N7E7, A7MB41, F1MBB0, A5D7K6, A6H737, F1MD32, E1BPY4, F1MMY4, F1MSU6, F1N551, F1N215, A7Z034, A6QPT6, F1MPS0, G3MX46, Q6T8E9, F1MC39, G3N361, Q08DJ8, E1BCU5, F1MTR3, Q5EAB2, E1B7Q6, F1MCY1, F1MPD5, G3X6J7, E1BKC4, Q1LZF1, E1BBH8, E1BNS3, E1B7A1, F1MQ55,…	1418	308	13095	1.97889	7.25627e-05	7.25627e-05	0.000122484
INTERPRO	IPR000742:Epidermal growth factor-like domain	48	2.48447	1.00114e-07	E1BDN7, Q2KIT5, O18977, F1MYW1, Q28019, F1MPE9, G5E5W9, E1BBU2, E1BPS6, P48733, E1BGE0, F1MLR3, G3X812, G3X6N5, E1B949, F1MN54, F1MLJ7, E1BPZ1, F1MYL5, E1BL59, A4FV93, F1MXE0, F1MKV7, F1MC84, F1MSI2, F1MYX9, E1BE11, E1BLD9, E1BNJ1, G3N1F4, F1N2V0, E1BGJ0, E1B9K4, F1N444, F1N6H1, F1MD77, F1MHH5, F1N6Y9, A5D7M5, F1MIY8, E1BJ11, G1K1H0, F1N740, Q5E9P5, F1MER7, F1MZD0, F1MNH3, E1B9M8	1806	197	16802	2.26683	0.000229734	3.82927e-05	0.000174892
INTERPRO	IPR013032:EGF-like, conserved site	44	2.27743	1.00958e-07	E1BDN7, Q2KIT5, O18977, F1MYW1, Q28019, F1MPE9, G5E5W9, E1BPS6, P48733, A6QLK4, E1BGE0, G3X812, G3X6N5, E1B949, F1MLJ7, E1B864, F1N102, E1BL59, A4FV93, F1MXE0, F1MVW3, F1MKV7, F1MC84, F1MSI2, E1BE11, E1BLD9, E1BNJ1, G3N1F4, F1N2V0, E1BGJ0, F1N444, E1B9K4, F1MD77, F1N6H1, F1MHH5, F1N6Y9, A5D7M5, F1MIY8, E1BJ11, Q5E9P5, F1MER7, F1MZD0, F1MNH3, E1B9M8	1806	173	16802	2.36619	0.000231672	3.30993e-05	0.000176367
INTERPRO	IPR019786:Zinc finger, PHD-type, conserved site	22	1.13872	1.86361e-07	E1B8Z0, E1BLB1, E1B7A1, F1MLY5, F1MFD2, E1BJG5, F1MP49, G3N0D9, E1BGA4, F1MPV5, F1MY77, E1BPS1, E1BBS1, E1BK85, E1BGZ9, F1MNE1, Q32LL5, E1BMS9, F1N3F6, F1MMY4, E1BIA9, F1MQ59	1806	57	16802	3.5908	0.000427607	5.34609e-05	0.00032556
INTERPRO	IPR001965:Zinc finger, PHD-type	26	1.34576	2.2735e-07	E1B8Z0, F1MLY5, F1MFD2, E1BJG5, G3N0D9, E1BGA4, E1BPS1, E1BBS1, E1BK85, F1MNE1, Q32LL5, E1BMS9, E1BIA9, E1B9N8, E1BLB1, E1B7A1, E1BKN0, F1MP49, F1N6I8, E1BLZ5, F1MY77, F1N3F6, F1MMY4, E1B9X1, E1B8T3, F1MQ59	1806	77	16802	3.14142	0.000521633	5.79726e-05	0.000397166
INTERPRO	IPR003961:Fibronectin, type III	46	2.38095	2.32956e-07	O18977, E1BJQ3, Q95141, F1MYK8, F1MPN0, E1B8X1, F1MSV1, F1MTF9, F1N6H6, A7MBJ4, E1B755, E1BPU9, E1BBE9, F1MX14, F1MLR3, G3MYY6, F1N3R6, A7MBC4, F1MNG8, E1BCJ9, F1MGX7, F1MN54, E1BNH9, F1MXJ6, E1BP05, E1BPZ1, V6F9B3, E1BJ31, E1BE71, E1B864, F1N4K6, E1B7H2, A6QP89, F1MGK5, G3MZU6, G3MZJ5, E1BB91, F1MM03, E1BLM2, F1MJR2, F1MPI1, E1BF00, E1BBI3, E1BA43, F1MGK8, G3MYX8	1806	190	16802	2.25241	0.000534492	5.34621e-05	0.000406959
INTERPRO	IPR001487:Bromodomain	17	0.879917	2.63621e-07	E1B8Z0, E1BNS3, E1BJG5, F1MP49, G3N0D9, F1N6I8, F1MSA7, E1BGA4, F1N1C9, F1MY77, E1BPS1, F1MNE1, E1BP59, E1BNH8, F1MD32, F1MRA1, A5PKK5	1806	36	16802	4.39329	0.000604827	5.49994e-05	0.000460528
GOTERM_BP_DIRECT	GO:0000122~negative regulation of transcription from RNA polymerase II promoter	81	4.19255	3.12107e-07	E1BPQ1, A7Z017, F1MKS4, F1N616, F1N4V2, A7MBB7, A4IFD2, Q24K09, E1B806, G3N348, E1BGD3, E1BFX6, E1B7S6, A7MBC4, A5D7H2, E1BE01, Q5E9D3, Q3B7M7, F1MBH4, E1BKA3, F1MVT0, E1BIA9, F1MMF1, E1BJ34, E1BQ37, F1MHU9, F1MBB0, F1N3I6, E1BLZ5, A7YY54, Q5E9B6, F1MFZ9, F1MWW8, Q32LB3, F1ML16, A7MB49, F1N786, G3X8E4, A5D7G2, F1MNA5, A3KMW6, E1BPY4, F1MMY4, E1BMR3, E1B815, F1N3D4, E1B6Z2, F1N215, A7Z034, G3MX46,…	1501	420	13824	1.77619	0.00114571	0.00114571	0.000574666
INTERPRO	IPR011011:Zinc finger, FYVE/PHD-type	33	1.70807	3.50583e-07	E1B8Z0, F1MLY5, F1MFD2, E1BJG5, G3N0D9, Q05B78, E1BGA4, E1BBS1, F1MKY4, E1BPS1, E1BK85, F1MNE1, E1BGZ9, Q32LL5, E1BMS9, E1BIA9, F1N415, E1B9N8, E1BLB1, E1B7A1, E1BKN0, F1MP49, F1MET5, F1N6I8, E1BLZ5, E1BLZ4, F1MY77, E1BEG4, F1MMM4, E1BMN9, F1N3F6, F1MMY4, F1MQ59	1806	116	16802	2.64667	0.000804265	6.70468e-05	0.000612445
UP_KEYWORDS	EGF-like domain	35	1.81159	1.29989e-06	E1BDN7, Q2KIT5, Q28019, F1MPE9, G5E5W9, Q8SQG8, E1BPS6, P48733, A6QLK4, E1BGE0, G3X812, G3X6N5, E1B949, F1MN54, F1MLJ7, E1BPZ1, E1BL59, A4FV93, F1MXE0, F1MKV7, F1MC84, F1MSI2, E1BE11, G3N1F4, F1N2V0, E1BGJ0, F1N444, E1B9K4, F1N6H1, F1N6Y9, E1BJ11, G1K1H0, Q5E9P5, F1MZD0, F1MNH3	1884	136	17808	2.43256	0.000428871	0.000214459	0.00176226
INTERPRO	IPR001791:Laminin G domain	19	0.983437	1.46206e-06	F1MYL5, F1N084, A4FV05, F1MC84, F1MSI2, F1MYX9, F1MY84, F1N2V0, F1MJQ6, F1MTP1, Q32S24, G3MXE4, E1B949, F1MHH5, F1N6Y9, E1BJ11, F1MER7, E1BP05, F1MLJ7	1806	49	16802	3.60745	0.00334981	0.000258077	0.0025541
INTERPRO	IPR000152:EGF-type aspartate/asparagine hydroxylation site	27	1.39752	1.66217e-06	Q2KIT5, E1BDN7, Q28019, F1MPE9, E1BPS6, P48733, E1BGE0, G3X812, G3X6N5, E1B949, F1MN54, F1MLJ7, E1BL59, F1MXE0, A4FV93, F1MKV7, F1MC84, E1BE11, F1N2V0, E1BGJ0, F1N444, E1B9K4, F1N6H1, F1N6Y9, E1BJ11, F1MZD0, F1MNH3	1806	90	16802	2.79103	0.00380743	0.000272441	0.00290367
GOTERM_MF_DIRECT	GO:0005524~ATP binding	184	9.52381	1.7402e-06	E1BJM5, E1B7V7, F1MY41, Q3ZBV8, Q58DM2, A3KN07, Q3T084, E1BC41, Q2NKY8, E1B9R5, F1MNE5, A6QP02, F1MEM4, E1BIM8, F1MRN7, F1MBL6, A6QQH7, F1N3B9, G3MWN6, Q1RMS2, Q08DH8, Q9TTA5, A5PK86, E1BB52, E1BPM4, F1MB07, F1MXE2, A2VDN0, E1BEM1, E1B768, E1B8H0, E1BLV6, A7MB49, F1MIP7, E1BBT9, E1BK76, Q27991, G5E556, G3MYX8, F1MMQ6, E1BBM3, E1BMP3, F1MKI1, E1B7X9, G3X7J5, F1MWK1, E1B754, E1BC69, F1N3W6, E1BKW7,…	1418	1224	13095	1.38824	0.00161186	0.000806256	0.00272285
KEGG_PATHWAY	bta04919:Thyroid hormone signaling pathway	27	1.39752	2.96041e-06	E1BPQ1, F1N551, A6QPT0, E1BE66, F1MPE9, F1MPU1, E1BNT2, F1MVD0, E1BPA1, F1MTR3, G3X812, E1B7Q6, E1BIM8, E1BHX7, E1BFB4, E1BPP7, Q0VCX4, F1MGM4, E1BNU2, F1N4I1, P10895, P10894, E1BP59, E1BCV1, F1MD32, E1BPY4, F1MRA1	658	113	7550	2.74161	0.000766452	0.000766452	0.00386717
KEGG_PATHWAY	bta04512:ECM-receptor interaction	23	1.19048	3.29555e-06	O18977, E1B864, F1MVW3, F1MD40, E1BB91, F1N2Y2, F1MSI2, F1MYX9, Q29397, F1MJQ6, F1MTP1, F1N7Q7, P02453, F1N0T1, F1MD77, Q32S24, F1MJY9, F1MQT9, P02459, E1BI98, F1MER7, F1MZU6, E1BDD5	658	87	7550	3.0334	0.000853184	0.000426683	0.00430496
INTERPRO	IPR000008:C2 calcium-dependent membrane targeting	36	1.86335	3.6865e-06	A6QPT0, E1B7B1, A5D784, E1BE66, E1BNT8, Q08DB4, F1N3U6, F1MZM7, E1BKQ2, F1MBT5, F1MBU9, E1BHX7, E1BMQ1, E1B8U8, F1MYG1, F1MP30, E1BH78, F1N415, A4IFJ5, E1BH60, E1BB77, F1N0W4, F1N3I6, F1N3I4, F1MLS5, A0A024QYS0, P10895, F1MF11, P10894, F1MMM4, F1MBI8, E1BJ18, P09851, E1BJ13, Q28013, F1MG30	1806	146	16802	2.294	0.00842485	0.000563877	0.00643989
INTERPRO	IPR013602:Dynein heavy chain, domain-2	9	0.465839	5.81084e-06	F1N724, G3N1C8, F1N1K6, F1N5R7, E1BDX8, F1MK55, E1BLB4, F1MSP8, E1B9R5	1806	12	16802	6.97757	0.0132474	0.000833147	0.0101507
INTERPRO	IPR024317:Dynein heavy chain, P-loop containing D4 domain	9	0.465839	5.81084e-06	F1N724, G3N1C8, F1N1K6, F1N5R7, E1BDX8, F1MK55, E1BLB4, F1MSP8, E1B9R5	1806	12	16802	6.97757	0.0132474	0.000833147	0.0101507
INTERPRO	IPR024743:Dynein heavy chain, coiled coil stalk	9	0.465839	5.81084e-06	F1N724, G3N1C8, F1N1K6, F1N5R7, E1BDX8, F1MK55, E1BLB4, F1MSP8, E1B9R5	1806	12	16802	6.97757	0.0132474	0.000833147	0.0101507
INTERPRO	IPR004273:Dynein heavy chain domain	9	0.465839	5.81084e-06	F1N724, G3N1C8, F1N1K6, F1N5R7, E1BDX8, F1MK55, E1BLB4, F1MSP8, E1B9R5	1806	12	16802	6.97757	0.0132474	0.000833147	0.0101507
SMART	SM00297:BROMO	17	0.879917	6.44162e-06	E1B8Z0, E1BNS3, E1BJG5, F1MP49, G3N0D9, F1N6I8, F1MSA7, E1BGA4, F1N1C9, F1MY77, E1BPS1, F1MNE1, E1BP59, E1BNH8, F1MD32, F1MRA1, A5PKK5	1193	36	8740	3.45953	0.00315785	0.00315785	0.0092521
SMART	SM00179:EGF_CA	34	1.75983	7.1926e-06	Q2KIT5, E1BDN7, F1MYW1, Q28019, F1MPE9, E1BPS6, P48733, E1BGE0, G3X812, G3X6N5, E1B949, F1MN54, F1MLJ7, E1BL59, A4FV93, F1MXE0, F1MKV7, F1MC84, F1MSI2, E1BE11, E1BNJ1, G3N1F4, F1N2V0, E1BGJ0, F1N444, E1B9K4, F1N6H1, F1MHH5, F1N6Y9, E1BJ11, Q5E9P5, F1MER7, F1MZD0, F1MNH3	1193	111	8740	2.24402	0.00352535	0.00176423	0.0103307
SMART	SM00181:EGF	43	2.22567	7.21881e-06	E1BDN7, Q2KIT5, O18977, F1MYW1, Q28019, F1MPE9, G5E5W9, E1BPS6, P48733, E1BGE0, F1MLR3, G3X812, G3X6N5, E1B949, F1MN54, F1MLJ7, E1BPZ1, F1MYL5, E1BL59, A4FV93, F1MXE0, F1MKV7, F1MC84, F1MSI2, F1MYX9, E1BE11, E1BNJ1, G3N1F4, F1N2V0, E1BGJ0, E1B9K4, F1N444, F1MD77, F1N6H1, F1MHH5, F1N6Y9, E1BJ11, F1N740, Q5E9P5, F1MER7, F1MZD0, F1MNH3, E1B9M8	1193	156	8740	2.01937	0.00353818	0.00118079	0.0103683
INTERPRO	IPR002110:Ankyrin repeat	44	2.27743	8.41543e-06	F1MB71, A7Z034, F1MYK8, E1BJK1, P79100, F1MAV4, F1MPE9, A7MBB7, F1MGH2, O97902, G3X812, Q08E59, F1MML3, F1MCA3, F1MMV0, E1BN43, G3X7P4, G5E5G8, A6QR20, A4IFL7, E1BFD6, E1BMY0, F1MBJ0, E1BAT5, F1N6C1, F1MSK0, E1BNU3, E1BMF4, E1B9S2, A0JN59, G3N3W0, E1BKN6, F1N1B8, F1MDC0, A7VJS4, F1MWG7, G3X8E4, F1N0U2, E1BP31, G5E618, F1MZ03, E1B8R5, E1BIJ3, A5PK11	1806	202	16802	2.02649	0.0191282	0.00113544	0.0147002
INTERPRO	IPR018097:EGF-like calcium-binding, conserved site	25	1.294	9.90776e-06	E1BDN7, Q2KIT5, Q28019, E1BL59, A4FV93, F1MXE0, F1MPE9, F1MKV7, F1MC84, E1BE11, E1BPS6, P48733, F1N2V0, E1BGE0, E1BGJ0, G3X812, E1B9K4, F1N444, F1N6H1, G3X6N5, E1B949, F1MN54, F1MZD0, F1MNH3, F1MLJ7	1806	87	16802	2.6734	0.0224819	0.00126245	0.0173068
INTERPRO	IPR020683:Ankyrin repeat-containing domain	45	2.32919	1.01648e-05	F1MB71, A7Z034, E1BJK1, F1MYK8, P79100, F1MAV4, F1MPE9, A7MBB7, F1MGH2, O97902, G3X812, Q08E59, F1MML3, F1MCA3, F1MMV0, E1BN43, G3X7P4, G5E5G8, A6QR20, A4IFL7, E1BFD6, E1BMY0, F1MBJ0, E1BFD1, E1BAT5, F1N6C1, F1MSK0, E1BNU3, E1BMF4, E1B9S2, A0JN59, G3N3W0, E1BKN6, F1N1B8, F1MDC0, A7VJS4, F1MWG7, G3X8E4, F1N0U2, E1BP31, G5E618, F1MZ03, E1B8R5, E1BIJ3, A5PK11	1806	210	16802	1.99359	0.0230584	0.00122706	0.0177558
INTERPRO	IPR019787:Zinc finger, PHD-finger	21	1.08696	1.17233e-05	E1B8Z0, E1B7A1, F1MLY5, E1BKN0, F1MFD2, E1BJG5, F1MP49, G3N0D9, F1N6I8, E1BLZ5, F1MY77, E1BBS1, E1BPS1, E1BK85, F1MNE1, Q32LL5, F1N3F6, F1MMY4, E1BIA9, F1MQ59, E1B9N8	1806	66	16802	2.96018	0.0265465	0.00134436	0.0204779
INTERPRO	IPR000330:SNF2-related	14	0.724638	1.1797e-05	Q9TTA5, E1BAN8, E1BLB1, F1N734, E1BPM4, E1BDZ3, E1BC33, E1B7X9, F1MLB1, E1BCV0, F1N3F6, E1BEK4, F1N507, A5PKK5	1806	32	16802	4.07025	0.026711	0.00128842	0.0206066
UP_SEQ_FEATURE	compositionally biased region:Pro-rich	21	1.08696	1.44403e-05	A7Z026, Q2YDD2, Q4JF29, Q5BIR3, A0JND4, Q08E53, E1B716, Q29RN8, Q6T8E9, Q0P5L0, O97902, Q29RK0, A6QR00, Q9XSC3, Q0VCC5, Q0P5J8, Q0P5D2, Q08DG7, F1N3D4, A4FV52, P55106	351	124	6267	3.02378	0.0183139	0.0183139	0.02353
SMART	SM00249:PHD	26	1.34576	1.73435e-05	E1B8Z0, F1MLY5, F1MFD2, E1BJG5, G3N0D9, E1BGA4, E1BPS1, E1BBS1, E1BK85, F1MNE1, Q32LL5, E1BMS9, E1BIA9, E1B9N8, E1BLB1, E1B7A1, E1BKN0, F1MP49, F1N6I8, E1BLZ5, F1MY77, F1N3F6, F1MMY4, E1B9X1, E1B8T3, F1MQ59	1193	77	8740	2.47374	0.00847959	0.00212667	0.0249087
KEGG_PATHWAY	bta04510:Focal adhesion	38	1.96687	1.8139e-05	O18977, A6QPT0, E1BMP3, E1BE66, F1MFD1, F1N2Y2, F1MDD9, F1MJQ6, F1MTP1, E1BE25, P02453, F1MIX6, F1N0T1, Q32S24, F1MWF1, E1BIM8, P02459, E1BI98, F1MDH3, E1B801, F1MZU6, Q0VCX4, E1BDD5, F1MT98, E1B864, F1MVW3, F1MD40, E1BB91, F1MYX9, E1B716, Q9XS49, F1N7Q7, A0A024QYS0, F1MD77, F1N7C3, F1MJY9, E1BCV1, F1MQI1	658	208	7550	2.09624	0.00468703	0.00156479	0.0236928
GOTERM_CC_DIRECT	GO:0016363~nuclear matrix	19	0.983437	1.96433e-05	F1MJM0, E1BBV0, E1BJF4, Q1LZD9, E1BQ37, A7MB41, Q3MHZ4, A7MB37, G3N361, P13213, A6QQE3, F1MMW4, F1MVC0, Q5BIM8, F1MPD5, E1BLT3, F1MVN0, A6QR23, F1MNL8	1648	58	15461	3.07331	0.0131525	0.00659801	0.0294692
GOTERM_CC_DIRECT	GO:0015629~actin cytoskeleton	32	1.65631	1.97842e-05	E1BMP3, E1BDC7, Q3ZBV8, F1MGR9, A7Z032, G3MZK6, F1MCK2, F1MUH9, E1BLC6, F1N469, Q3T0G8, E1BM06, Q9TTS3, F6QPK8, E1BBS9, F6RHP0, E1B801, Q32LP9, E1BCL1, E1B7Y3, G3X7K6, F1MTM9, F1MSE6, Q3MHM6, E1BA93, G3X6R3, F1N6I9, F6R8E7, E1B8H0, F1N6S8, E1BNR0, E1BP52, A4IFK4	1648	133	15461	2.25725	0.0132462	0.00443503	0.0296805
INTERPRO	IPR000403:Phosphatidylinositol 3-/4-kinase, catalytic domain	10	0.517598	2.03154e-05	A6QLA2, F1MBU9, A6QPT0, E1BE66, F1MBL6, E1BFB4, E1BKJ5, O02811, E1BLB6, F1MLY7	1806	17	16802	5.47261	0.045554	0.00211704	0.0354837
GOTERM_MF_DIRECT	GO:0000977~RNA polymerase II regulatory region sequence-specific DNA binding	36	1.86335	2.2882e-05	F1N551, A7Z034, Q95LI3, F1MP14, F1N694, E1BPH8, G3N054, E1BAG4, E1B9T6, A7MBB7, E1BCU5, Q8SQ19, E1BGD3, F1MTI9, F1MBH4, E1BG70, F1MFQ4, E1B801, E1BCL1, F1MT17, E1B7A1, G3X7K6, F1MXG5, E1BI59, A7MB41, F1MBB0, F1MPV5, E1BI80, F1MY77, E1BEG7, E1BIV1, F1MIH1, A5D7Q4, F1MRA1, E1B7H9, F1MFE5	1418	157	13095	2.11754	0.0209885	0.00704568	0.0357975
INTERPRO	IPR009091:Regulator of chromosome condensation 1/beta-lactamase-inhibitor protein II	11	0.569358	2.30569e-05	A7Z018, F1MMV0, E1BH40, A6QP00, F1N0C0, E1B782, F1N0L2, A2VDP7, E1B8U7, F1MDF3, F1MM88	1806	21	16802	4.87323	0.0515405	0.00229806	0.0402713
GOTERM_BP_DIRECT	GO:0045944~positive regulation of transcription from RNA polymerase II promoter	96	4.96894	2.36864e-05	E1BPQ1, A7Z017, E1BDN7, E1BC87, E1BEN9, F1MKS4, Q2TEA4, B0JYK8, E1BAG4, M5FMX2, E1BC86, A7MBB7, Q8SQG8, A0JNC9, E1BGA4, F1MVD0, A4IFD2, F1N264, A3KN07, P98201, E1BND5, Q8SQ19, A4IFH3, A5D7H2, E1BE01, G3N346, E1BPP7, Q5EA36, Q27981, E1B9N8, A6QLJ0, E1BPM4, A6QLB8, E1BJ34, F1MBB0, Q645M6, E1BAD7, A7YY54, Q5E9B6, F1MWW8, Q9BE97, Q3ZCD0, F1MNA5, E1BIV1, E1BPY4, F1MIH1, E1BFN3, A7MB57, F1N1Z3, F1N3D4,…	1501	580	13824	1.52439	0.0833239	0.042568	0.0436036
GOTERM_MF_DIRECT	GO:0001227~transcriptional repressor activity, RNA polymerase II transcription regulatory region sequence-specific binding	17	0.879917	2.51427e-05	A7Z034, F1N4K5, F1MXG5, E1BAG4, F1MSU2, A7MB41, F1N264, F1N3S3, E1BCU5, E1BGD3, E1BIV1, Q5E9D3, E1BG70, E1B801, F1MFQ4, A5D7Q4, Q1LZF1	1418	48	13095	3.27067	0.0230381	0.00580996	0.0393337
KEGG_PATHWAY	bta04915:Estrogen signaling pathway	23	1.19048	2.57162e-05	E1BQ12, A6H7G9, A6QPT0, P19754, E1BE66, E1BNX4, Q8WN96, Q8WN95, E1B716, P52176, A0JNC9, P27925, A4FUY2, Q9GLE5, Q8SQ19, P10894, E1BHX7, E1BIM8, F1N7C3, E1B9K3, E1BCV1, G3MXV0, F1MDE0	658	98	7550	2.69292	0.00663844	0.00166376	0.0335884
INTERPRO	IPR002035:von Willebrand factor, type A	25	1.294	2.74988e-05	E1BB22, A5D784, Q08DB4, A6QQ97, G3MXE4, E1BI98, E1BCW8, E1BDD5, E1B864, E1B7H2, F1MVW3, E1BD12, E1BB91, F1MD40, F1MV07, E1BC74, F1MHZ1, E1BPV7, E1BE11, E1B9K4, E1BB39, P56652, E1BMR9, F1MNH3, F1N3D4	1806	92	16802	2.52811	0.0611604	0.00262616	0.0480278
KEGG_PATHWAY	bta04611:Platelet activation	27	1.39752	2.7625e-05	A6QPT0, E1BMP3, E1BE66, F1N2Y2, A7YY44, F1MJQ6, F1MTP1, P02453, Q32S24, E1BIM8, Q58CP9, E1BHX7, P02459, F1MDH3, E1B801, A4IFJ5, P02672, E1BQ12, P19754, Q8WN96, Q8WN95, F1MZA2, P10894, E1B9K3, E1BCV1, F1MG30, F1MQI1	658	127	7550	2.43939	0.00712945	0.00142997	0.0360812
INTERPRO	IPR013098:Immunoglobulin I-set	30	1.5528	2.88602e-05	F1N3H2, A7MBJ4, F1MDD9, E1BAU3, F1MX14, G3MYY6, E1BCW5, F1MWF1, F1MGX7, E1BNH9, F1MXJ6, E1BPK8, E1BE71, E1BGL8, F1N4K6, A6QP89, G3MZU6, A5PJP9, F1MM03, F1MJR2, E1BLM2, E1BE11, F1MPI1, E1B9K4, F1MBT2, E1BBI3, F1N7L3, F1MER7, E1BPQ9, F1MWK8	1806	122	16802	2.28773	0.0640893	0.0026459	0.050405
UP_KEYWORDS	ANK repeat	41	2.12215	2.94518e-05	F1MB71, A7Z034, F1MYK8, E1BJK1, P79100, F1MAV4, F1MPE9, A7MBB7, F1MGH2, O97902, G3X812, F1MML3, F1MCA3, F1MMV0, E1BN43, G3X7P4, G5E5G8, A6QR20, A4IFL7, E1BFD6, E1BMY0, F1MBJ0, E1BAT5, E1BNU3, E1BMF4, E1B9S2, A0JN59, G3N3W0, E1BKN6, F1N1B8, F1MDC0, A7VJS4, F1MWG7, G3X8E4, F1N0U2, E1BP31, G5E618, F1MZ03, E1B8R5, E1BIJ3, A5PK11	1884	195	17808	1.98739	0.00967217	0.00323451	0.0399208
SMART	SM00282:LamG	16	0.828157	3.21891e-05	F1MYL5, F1N084, A4FV05, F1MC84, F1MSI2, F1MYX9, F1MY84, F1N2V0, Q32S24, E1B949, F1MHH5, F1N6Y9, E1BJ11, F1MER7, E1BP05, F1MLJ7	1193	36	8740	3.25603	0.0156809	0.00315603	0.0462253
INTERPRO	IPR026983:Dynein heavy chain	8	0.414079	3.64236e-05	F1N724, G3N1C8, F1N1K6, F1N5R7, F1MK55, E1BLB4, F1MSP8, E1B9R5	1806	11	16802	6.76613	0.0801951	0.00320998	0.0636106
GOTERM_BP_DIRECT	GO:0051292~nuclear pore complex assembly	7	0.362319	3.72945e-05	E1BM06, E1BCV4, F1N1V3, F1MNL8, A5PJZ5, E1BIX5, F1N405	1501	8	13824	8.05863	0.128017	0.0446349	0.0686462
INTERPRO	IPR018359:Bromodomain, conserved site	11	0.569358	3.82044e-05	E1BNS3, E1BP59, E1BNH8, F1MD32, F1MP49, F1MSA7, F1N6I8, G3N0D9, F1MRA1, A5PKK5, E1BPS1	1806	22	16802	4.65172	0.0839468	0.00324217	0.0667197
GOTERM_MF_DIRECT	GO:0008270~zinc ion binding	142	7.3499	3.88715e-05	Q2TEA4, Q3MHZ4, A5D7L9, F1MSJ5, E1BBE9, Q24K09, E1BBS1, Q3T0G8, F1MNE1, E1B782, Q2TA23, F1MPF2, E1BKN0, E1BP63, F1N0Y9, Q0P5M8, E1BF46, F1MPV5, Q5E9B6, Q9GLE5, E1BD59, E1BI72, F1MMY4, G3X7R9, E1B8Z0, E1BJK1, F1MPW8, Q08E53, G3N0D9, E1BPS1, E1BL04, A6QQS9, E1BKW8, E1BIW0, Q27U16, E1BJS7, F1N510, F1MEB7, E1B928, F1MP12, E1BLB1, E1BMF7, F1MJN1, E1BI59, E1BNA9, E1BF00, E1BIX5, F1N303, G5E5B2, E1BIX2,…	1418	948	13095	1.38328	0.035393	0.007181	0.060805
INTERPRO	IPR001849:Pleckstrin homology domain	47	2.43271	3.99436e-05	F1MDV3, F1MQ44, F1MNV2, F1MIM9, E1BNT8, F1MH50, Q1KZG5, A7Z032, F1MJE0, F1MBT5, E1BJC1, O97902, F1MRW6, F1N657, F1MYE0, F1MM72, F1MJV1, F1MYC9, F1MXJ6, A4IFL7, A6QP95, F1MLJ5, F1MCG9, F1N1Q7, E1BH60, F1MQ30, E1BPM7, E1B7C4, F1N6I9, E1BB77, E1BMD4, E1BK14, F1MZA2, P21146, A7MB96, F1MUS9, F1MF11, P10895, F1MGG8, F1MBI8, F1N7C3, F1MZ03, E1BLT3, F1MRH8, P09851, Q28013, F1MSU8	1806	235	16802	1.86069	0.0875959	0.00326866	0.0697559
GOTERM_CC_DIRECT	GO:0005604~basement membrane	17	0.879917	4.85544e-05	F1MFH3, E1B7H2, A4FV05, E1BE11, E1BPV7, P13213, F1N7Q7, A6H737, E1B9K4, F1N0T1, E1BN52, F1MD77, A6QPB3, P02459, A5D7T2, F1MZU6, E1BP05	1648	51	15461	3.12722	0.0321967	0.00814823	0.0728272
GOTERM_CC_DIRECT	GO:0031965~nuclear membrane	31	1.60455	5.17295e-05	A7Z018, F1MG84, F1MFD5, F1MGT1, E1BA84, Q5E9A7, A5PJZ5, E1BM03, F1MM55, E1BM06, A1L5C6, E1BMS9, E1BA71, F1MLJ5, E1BH84, E1BC93, E1BLK1, F1N1V3, F1MF78, E1BIX5, A6QQE3, P10894, E1BCV4, A5D7C4, Q0VCC5, E1BE98, A5D9C3, F1MSU6, F1MNL8, Q2TLZ3, Q0IIH8	1648	133	15461	2.18671	0.0342657	0.00694905	0.0775878
INTERPRO	IPR013083:Zinc finger, RING/FYVE/PHD-type	68	3.51967	5.38197e-05	F1MFD2, Q05B78, E1BGA4, F1MSJ5, E1BBS1, E1BBE9, F1MNE1, E1B847, E1BP22, E1BIA9, E1B9N8, E1BKN0, F1MQ30, E1BP63, F1N6I8, A7Z060, E1BLZ4, E1BBP0, F1MDC0, E1BD59, F1MMM4, E1BGW9, F1MMY4, E1BPY6, A6QNS2, E1BBI7, E1B8Z0, F1MLY5, E1BH40, F1MFB5, Q2TA44, F1MAV4, E1BJG5, G3N0D9, E1B7I1, E1BPS1, F1MKY4, E1BK85, E1BKW8, E1BIW0, Q27U16, A5PKG6, F1N2S5, E1BJS7, E1BGZ9, Q32LL5, F1N510, F1MEB7, E1BMS9, E1B928,…	1806	387	16802	1.63471	0.116196	0.00425024	0.093978
INTERPRO	IPR002017:Spectrin repeat	10	0.517598	6.31767e-05	F1MQ44, F1MGT1, E1BLT3, F1MRT9, F1MYC9, F1MXJ6, E1BK14, F1MF78, E1BFB0, F1MMQ8	1806	19	16802	4.89654	0.134973	0.00482151	0.110308
GOTERM_MF_DIRECT	GO:0000978~RNA polymerase II core promoter proximal region sequence-specific DNA binding	52	2.69151	6.58465e-05	E1BC87, E1BNZ8, F1MGR9, A7MBB7, F1MNA3, F1N4J1, E1BNL6, A0JNC9, A4IFD2, Q8SQ19, E1BLY0, E1B7S6, E1BPP7, E1BN65, B2CML0, E1BJ30, E1BPM4, F1MW83, F1MSU2, E1BAD7, E1BI80, A7YY54, Q5E9B6, E1BFW7, E1B8C0, F1MW46, E1BPY4, F1N215, E1BA84, E7E1K7, F1MZB6, E1BL43, A6QLQ3, Q08DJ8, F1MCY1, E1BFK8, E1BLS1, E1BD25, G3X6J7, A4FV57, F1MV76, Q1LZF1, F1MT17, F1MT98, Q6VFT7, E1BI59, A9CR99, Q08E02, Q3B7M4, E1BJP4,…	1418	273	13095	1.75902	0.059216	0.010122	0.102981
SMART	SM00060:FN3	37	1.91511	6.60711e-05	O18977, E1BJQ3, F1MYK8, F1MPN0, E1B8X1, F1MSV1, A7MBJ4, F1N6H6, E1B755, E1BPU9, G3MYY6, F1N3R6, F1MNG8, E1BCJ9, F1MGX7, F1MN54, F1MXJ6, E1BP05, E1BPZ1, E1BJ31, E1BE71, E1B864, F1N4K6, E1B7H2, A6QP89, F1MGK5, G3MZJ5, G3MZU6, E1BB91, F1MM03, F1MJR2, E1BLM2, F1MPI1, E1BBI3, E1BA43, F1MGK8, G3MYX8	1193	138	8740	1.96424	0.0319214	0.00539241	0.0948603
INTERPRO	IPR009030:Insulin-like growth factor binding protein, N-terminal	27	1.39752	6.87938e-05	Q2KIT5, E1BDN7, E1BJ31, Q28019, E1BL59, F1MPE9, F1MKV7, F1MIM6, F1MSI2, E1BE11, P48733, P01267, E1BGJ0, E1BGE0, G3X812, E1B9K4, F1N444, F1N6H1, F1N3R6, G3X6N5, E1B949, F1N6Y9, E1BJ11, F1N740, F1MZD0, F1MNH3, E1B9M8	1806	109	16802	2.30452	0.146054	0.00508019	0.12011
GOTERM_MF_DIRECT	GO:0044822~poly(A) RNA binding	127	6.5735	7.10206e-05	A0JNC2, Q1LZ90, F1MPN0, Q17QE8, E1B8X1, A6QP77, E1BAK6, A7MB37, Q0P5L0, E1BGE2, A3KN07, Q2NKY8, F1MEM4, A6QP00, F1MBL6, A5D7D4, Q5EA36, F1MI03, Q3MHH2, A2VDN6, F1MDN8, E1BB52, P49410, F1MHU9, F1N0Y9, A8E658, E1BIV7, A7MB48, Q2KI24, E1BCT7, E1BD59, Q08E27, Q2YDK1, F1MJM0, Q2KJJ0, F1MGT1, P80311, A7MB12, F1MCK2, E1BGZ1, F1MY06, G3N361, A1L561, A4IF81, P09867, A6QLH5, F1MX77, E1AXU0, E1BKW5, A6QPQ5,…	1418	840	13095	1.39622	0.0637179	0.00936139	0.111068
KEGG_PATHWAY	bta04974:Protein digestion and absorption	20	1.0352	8.12484e-05	E1B7H2, A4FV05, F1MD40, E1BB91, F1N2Y2, A7YY40, F1MJQ6, F1MDC2, F1MTP1, F1N7Q7, P02453, Q32S24, A6QPB3, G3MXE4, F1MJY9, P02459, P23206, E1BI98, F1MZU6, F6R9Y9	658	84	7550	2.73194	0.0208243	0.00350122	0.106085
INTERPRO	IPR001478:PDZ domain	31	1.60455	8.15104e-05	F1MDV3, E1BDC7, E1BFV9, E1B7V9, F1MSB5, E1B754, E1BHF6, E1BKK6, G3MZZ8, F1MCK2, E1BJQ7, G3X7P4, F1MCA7, F6RHP0, F1MMT3, F1N415, F1N1Q7, F1N0Y1, A6QPH2, E1BK33, F1N2X3, E1BKT3, F1MZA2, F1MDL2, F6R8E7, E1BM96, F1MZ23, G5E618, Q3MHE0, E1BLF1, A4IFK4	1806	135	16802	2.13634	0.170618	0.00582901	0.142298
INTERPRO	IPR002049:EGF-like, laminin	13	0.672878	9.31654e-05	Q2KIT5, F1MSI2, F1MYX9, E1BPS6, E1BGE0, F1MD77, F1N0T1, F1MHH5, F1N6Y9, E1BJ11, F1MER7, E1BP05, E1B9M8	1806	33	16802	3.66499	0.19251	0.00645859	0.162629
GOTERM_BP_DIRECT	GO:0060976~coronary vasculature development	10	0.517598	0.000112108	F1N4C5, F1N444, F1N6H1, E1BJ30, A5D7G2, E1BPS6, Q27991, Q9XS49, F1MWK8, Q08DS7	1501	20	13824	4.60493	0.337539	0.0978266	0.206217
INTERPRO	IPR015943:WD40/YVTN repeat-like-containing domain	55	2.84679	0.000152606	F1MB52, F1MF64, F1MC90, F1MJS7, A5D7H2, Q3B7M6, E1BH25, F1N4C5, Q5E966, A6QLB5, E1BDM5, E1BNY3, E1BMD1, Q29RM4, F1MUW4, E1BCT7, E1BE13, E1BF41, E1BFN3, F1N3C8, E1BJV8, E1BPY6, G3X6I6, A6QLV9, F1MWB8, F1N0C0, A6QP14, P35605, A7MB12, E1BML0, F1ML22, F1N1C9, E1BCH1, F1MLT6, E1BM03, F1MM55, Q5BIM8, Q9XSC3, E1BLS3, Q0VBY8, Q32LP9, F1MG90, A7MB85, F1MKR0, E1BG65, E1BDV4, G3X755, E1BL55, E1BL90, E1BKF9,…	1806	305	16802	1.67767	0.295494	0.0102488	0.266259
GOTERM_MF_DIRECT	GO:0000166~nucleotide binding	52	2.69151	0.000154096	B0JYK8, F1MYS7, F1MY44, F1MTX3, E1BP74, E1B8K2, E1BAK6, Q0P5L0, E1BFX6, F1MRB9, Q0P5D2, G1K177, Q5EA36, Q0V898, Q3SWY3, Q2T9U5, P19754, E1BQ37, F1MFZ9, Q2KI24, F1N6W2, E1BBP0, G3MX91, E1BPY8, A6QQP0, A6QPE1, F1N7J2, E1BIJ4, A7YW33, E1BB24, F1MYK6, A6QQZ9, F1MSH0, F1MY06, G3N361, Q3ZBP3, A4IF81, P09867, E1BQ12, Q1JPD6, G3X6T7, E1BJF4, Q1LZD9, E1BLX2, F1N6Y5, F1MND5, A4FUZ2, E1BIB4, F1MX25, E1B9K3,…	1418	282	13095	1.70288	0.133123	0.0176988	0.240843
INTERPRO	IPR012677:Nucleotide-binding, alpha-beta plait	45	2.32919	0.000169165	B0JYK8, F1MY44, F1MYS7, F1MTX3, A7YW33, E1BB24, F1MYK6, E1BP74, E1B8K2, A6QQZ9, E1BAK6, F1MSH0, G3N361, F1MY06, Q0P5L0, A4IF81, Q3ZBP3, P09867, E1BFX6, F1MRB9, Q0P5D2, G1K177, Q5EA36, Q0V898, Q2T9U5, Q1JPD6, E1BCC3, Q1LZD9, E1BQ37, E1BLX2, F1N6Y5, F1MND5, A4FUZ2, F1MFZ9, F1N6W2, Q2KI24, G3MX91, F1MMK3, E1BIB4, E1BLT2, F1MX25, A6QQP0, F1N2C2, A6QPE1, Q2HJD4, E1BIJ4	1806	235	16802	1.78151	0.321769	0.0110321	0.29511
GOTERM_CC_DIRECT	GO:0016020~membrane	131	6.78054	0.000174214	F1MYM8, F1MLE1, A7YY22, F1MNV8, E1BP74, E1B991, A7MBJ5, Q2TBI0, G5E630, A7MB37, A3KN07, F1MBT5, A6QM02, E1BC41, F1N469, O97902, Q3T0G8, Q3SYU9, Q27981, F1MDN8, E1BDM5, E1BMD5, F1MHU9, Q9GLE5, A6H737, A5PKJ6, A7MB49, F1MMB2, F1MLU5, F1MMQ8, F1N1E0, E1BMG8, E1BFC2, Q2KJJ0, P80311, F1MQ87, A6QQZ9, E1BNT2, G3N361, A6QQS9, P09867, F1MRP0, E1BB26, Q0VCX4, F1MKR0, E1BAF6, Q28107, A9CR99, F1N3G4, P21146,…	1648	902	15461	1.36253	0.110798	0.0193815	0.261076
INTERPRO	IPR001766:Transcription factor, fork head	13	0.672878	0.000178621	E1BPQ1, Q6VFT7, F1N694, G3MX55, F1MP14, E1BIV1, F1MW83, F1N4K5, E1B8C0, F1MZB6, F1MBH4, F1MVT0, A4IFD2	1806	35	16802	3.45556	0.336331	0.0113235	0.311581
INTERPRO	IPR001650:Helicase, C-terminal	25	1.294	0.00018946	E1BLB1, E1BAN8, Q9TTA5, F1N734, A5D786, E1BPM4, E1BGI6, E1B7X9, F1MLB1, F1MNA1, E1BEK4, A3KN07, Q2NKY8, A7MB49, F1MMK3, F1MEM4, E1BDZ3, E1BC33, E1BCV0, F1N3F6, Q28141, A5PKK5, F1N507, F1MFR1, E1BH78	1806	103	16802	2.25811	0.35264	0.011684	0.330459
UP_SEQ_FEATURE	glycosylation site:N-linked (GlcNAc...)	81	4.19255	0.000221608	Q2KIT5, Q0P5H1, Q95141, F1N1Q2, A6QLE6, E1BF56, A7MBJ4, Q29RN8, Q8SQG8, Q8MJ24, Q0V8E7, Q2TBI0, A6QLK4, P48733, A5PJQ2, Q8SQ19, Q29S03, Q32S24, O18875, A6QPB3, P02459, P49259, Q27981, Q3SX17, P19754, P45478, A6QNW6, P25326, A2VDN0, F1MR22, A6QLF8, G3N1F4, Q3ZC80, P13213, Q9GLE5, O77656, Q3ZCH5, Q5E9E4, P23206, O18767, Q2TLZ3, P55106, Q3MHX6, Q6URK6, Q1KZG0, Q28019, Q2TA44, A7YY44, P34974, Q29397,…	351	988	6267	1.4638	0.247	0.132244	0.360532
INTERPRO	IPR014001:Helicase, superfamily 1/2, ATP-binding domain	25	1.294	0.000258483	E1BLB1, E1BAN8, Q9TTA5, F1N734, A5D786, E1BPM4, E1BGI6, E1B7X9, F1MLB1, F1MNA1, E1BEK4, A3KN07, Q2NKY8, A7MB49, F1MMK3, F1MEM4, E1BDZ3, E1BC33, E1BCV0, F1N3F6, Q28141, A5PKK5, F1N507, F1MFR1, E1BH78	1806	105	16802	2.2151	0.447496	0.0154918	0.450594
INTERPRO	IPR007087:Zinc finger, C2H2	80	4.14079	0.000262068	F1MVH9, E1BPQ2, Q95LI3, F1N0E1, F1MWD7, A6QNV5, E1BHU5, F1N790, A0JNC9, F1MC90, F1N264, A7MAY9, E1B842, G3N2D0, E1BGD3, F1N463, A6QNZ1, F1MJD3, F1MLJ0, F1MIV1, F1MFQ4, E1BGQ4, G5E6Q2, E1BN65, B2CML0, E1BJ30, F1MMF1, G3N0N0, E1BCA0, F1N0Y9, F1N7E7, F1MWE1, E1BF46, F1N4I0, F1MI25, F1MFZ9, F1ML16, Q29RN3, F1MDR1, F1MUJ5, F1N4Z5, E1BMR6, F1MW46, A6QQG2, E1B9B2, F1MIB3, F1N215, E1BQ01, A6QPT6, E1BFC1,…	1806	499	16802	1.49153	0.452024	0.0153054	0.456829
INTERPRO	IPR018936:Phosphatidylinositol 3/4-kinase, conserved site	8	0.414079	0.000282735	F1MBU9, A6QPT0, E1BE66, F1MBL6, E1BFB4, O02811, E1BLB6, F1MLY7	1806	14	16802	5.31625	0.477416	0.0160933	0.492772
INTERPRO	IPR000504:RNA recognition motif domain	39	2.01863	0.000303675	B0JYK8, F1MY44, F1MYS7, F1MTX3, A7YW33, E1BB24, F1MYK6, E1BP74, E1B8K2, E1BAK6, F1MSH0, G3N361, Q0P5L0, Q3ZBP3, A4IF81, P09867, E1BFX6, F1MRB9, Q0P5D2, G1K177, Q5EA36, Q0V898, Q2T9U5, Q1JPD6, E1BCC3, Q1LZD9, E1BQ37, E1BLX2, F1N6Y5, F1MND5, A4FUZ2, F1MFZ9, Q2KI24, F1N6W2, G3MX91, E1BIB4, E1BLT2, A6QQP0, F1N2C2, Q2HJD4	1806	199	16802	1.82329	0.501943	0.0168573	0.529177
INTERPRO	IPR013320:Concanavalin A-like lectin/glucanase, subgroup	37	1.91511	0.000330089	A4FV05, F1MF64, F1N7Z6, Q3MHZ2, E1B8G2, F1MY84, E1BEP4, E1BPU9, F1MJQ6, F1MFJ4, F1MTP1, E1BBE9, F1MX14, E1BKW8, Q27U16, E1BDQ4, Q32S24, G3MXE4, E1B949, E1BIM6, E1BP05, F1MLJ7, F1MYL5, F1N084, F1MC84, F1MSI2, F1MYX9, F1N2V0, E1BF00, Q3T0D6, F1MHH5, F1N6Y9, E1BGW9, E1BJ11, E1BMX5, F1MER7, F1MNH3	1806	186	16802	1.85068	0.531247	0.0178783	0.575081
GOTERM_MF_DIRECT	GO:0005201~extracellular matrix structural constituent	13	0.672878	0.000344225	F1N2Y2, E1BBU2, F1MJQ6, F1MTP1, P02453, F1N7Q7, F1N2J5, F1MD77, Q32S24, F1MJY9, P02459, F1MZU6, F1MZD0	1418	37	13095	3.24467	0.273234	0.0348399	0.537254
GOTERM_MF_DIRECT	GO:0005509~calcium ion binding	89	4.60663	0.000365333	E1BDN7, Q2KIT5, F1MYW1, F1MPE9, A2VDQ6, P48733, E1BGE0, Q3T0G8, G3X812, E1BIA5, E1BHX7, E1B949, A5D7T2, E1BMQ1, E1BFB0, P13135, P57709, F1MLJ7, A4FV93, F1MXE0, F1MKX3, F1MSI2, E1BEM1, E1BE11, G3N1F4, E1BNJ1, F1N2V0, P13213, E1BGJ0, O77656, F1MMB2, P10895, P10894, F1MMM4, F1MHH5, F1MIY8, O18767, F1MER7, A5D7S6, F6Q0K7, F1N3M3, F1MZD0, F1MMQ8, G3X7Z2, A6QNM9, Q6URK6, Q28019, E1B971, E1BNT8, A7Z031,…	1418	571	13095	1.43941	0.287322	0.0333053	0.57011
INTERPRO	IPR001214:SET domain	15	0.776398	0.000366793	E1BJ30, G3N163, F1MMF1, E1BKN0, E1BDK1, F1MFD2, F1N790, E1BLX2, F1N6Y5, E1BBB5, E1BGA4, E1BEG7, F1MMY4, A5PK11, E1B9N8	1806	48	16802	2.90732	0.569128	0.0193896	0.638832
GOTERM_CC_DIRECT	GO:0043197~dendritic spine	13	0.672878	0.000394258	E1BFV9, F1MCH1, Q08E02, E1BKK6, F6R8E7, F1MSJ5, E1BJQ7, O97902, E1BIV2, Q2TBT7, G5E618, Q27991, F1MDF3	1648	38	15461	3.20952	0.233394	0.0372571	0.589922
KEGG_PATHWAY	bta04151:PI3K-Akt signaling pathway	50	2.58799	0.000414356	F1MYS7, O18977, E1BJQ3, Q95141, F1N2Y2, F1MDD9, F1MTP1, P02453, Q8SQ19, F1MYE0, Q32S24, P02459, E1BI98, E1BJ31, E1B864, F1MVW3, E1BB91, F1MD40, F1MYX9, E1BNU2, E1BMD4, Q9XS49, Q3ZC80, F1MD77, A0A024QYS0, F1MJY9, F1MGK8, E1BCP6, E1BEL4, A7Z034, A6QPT0, E1BE66, E1BNX4, A7YY44, E1BNT2, A4FUY2, F1MJQ6, F1N0T1, F1MWF1, E1BFB4, F1MZU6, E1BDD5, F1N4K5, E1BGY3, P27925, F1N7Q7, A5D7M0, F1MZF7, F1N7C3, E1B…	658	347	7550	1.65334	0.10178	0.0152174	0.539931
INTERPRO	IPR000408:Regulator of chromosome condensation, RCC1	9	0.465839	0.000443811	A7Z018, F1MMV0, E1BH40, A6QP00, E1B782, A2VDP7, E1B8U7, F1MDF3, F1MM88	1806	19	16802	4.40689	0.638962	0.0228879	0.772482
KEGG_PATHWAY	bta04931:Insulin resistance	22	1.13872	0.000501073	E1BPQ1, A7Z034, B0JYK8, Q58DK1, A6QPT0, E1BE66, A9CR99, E1BNX4, A7MBJ4, F1MJE0, P27925, Q5E9B6, E1BLN7, E1BIZ7, E1BPA1, A0A024QYS0, Q8SQ19, F1MYE0, E1BLS1, E1BCV1, E1BFB4, E1BQ16	658	111	7550	2.27416	0.121738	0.0160954	0.652587
GOTERM_MF_DIRECT	GO:0017056~structural constituent of nuclear pore	8	0.414079	0.000502039	E1BM06, F1MM55, E1BCV4, E1BG57, F1N1V3, A5PJZ5, E1BIX5, A6QM02	1418	15	13095	4.92525	0.372183	0.0414359	0.78266
GOTERM_MF_DIRECT	GO:0044212~transcription regulatory region DNA binding	26	1.34576	0.000554124	E1BEN9, Q2KJC1, E1BFC1, E1BQ00, Q3B7M4, E1BCA0, Q6T8E9, E1BEP4, F1MI25, E1B842, G3X8E4, F1MDR1, E1BIB4, E1BE01, E1BD25, F1MW46, F1MSS8, E1B9X1, F1MVT0, A5PKK5, F1MEP8, Q0VCX4, E1BN44, E1B8T3, E1BN65, E1B9N8	1418	116	13095	2.06988	0.401791	0.0419142	0.86353
GOTERM_MF_DIRECT	GO:0005096~GTPase activator activity	36	1.86335	0.000558496	F1MJI3, F1MFD5, E1BMG8, F1MCG4, E1BHF6, E1BNT2, F1MBT5, E1BPA1, O97902, F1MS60, F1MIX6, E1BKW7, G3X7P3, F1MM72, Q5E9J8, Q32KR8, A4IFL7, G3MXN3, A7YY57, A6QPH2, A5PK17, A5D794, E1BB77, A7MB96, F1MS95, E1BP38, P10894, E1BIV2, F1MBI8, F1MZ03, O97790, P09851, Q28013, F1MRD8, A6H7I2, F1MEY0	1418	183	13095	1.81669	0.404212	0.0390532	0.870316
UP_SEQ_FEATURE	region of interest:Triple-helical region	5	0.258799	0.000559462	P02453, Q32S24, A6QPB3, P23206, F1MZU6	351	8	6267	11.1592	0.511449	0.212404	0.907836
UP_SEQ_FEATURE	short sequence motif:Cysteine switch	5	0.258799	0.000559462	Q9GLE5, O77656, Q9TT93, O18767, P52176	351	8	6267	11.1592	0.511449	0.212404	0.907836
UP_KEYWORDS	Bromodomain	9	0.465839	0.00060243	E1BNS3, E1BP59, E1BNH8, F1MD32, F1MP49, F1MSA7, F1N6I8, F1MRA1, A5PKK5	1884	20	17808	4.2535	0.180337	0.0484998	0.813638
INTERPRO	IPR013594:Dynein heavy chain, domain-1	6	0.310559	0.000602694	F1N724, E1BDX8, F1MK55, E1BLB4, F1MSP8, E1B9R5	1806	8	16802	6.97757	0.749326	0.0302788	1.04766
GOTERM_MF_DIRECT	GO:0043565~sequence-specific DNA binding	59	3.05383	0.000621341	A7Z017, E1BPQ1, B0JYK8, Q2TEA4, F1N0Z3, Q2KJC1, F1N693, E1BPC7, F1MGR3, E1B842, E1BE01, G3N346, A4FV76, E1BGM6, F1MZE3, F1MVT0, F1N3B5, E1BN65, G3MX55, E1BCA0, A7MB41, F1MKX5, Q5E9B6, F1MI25, F1ML16, Q32LB3, Q9BE97, E1B855, F1MDR1, F1MW46, F1MMY4, Q08DG7, A6QPT6, E1BQ00, E1BJG5, A4FUA9, E1BNX4, F1MPW8, A4FUY2, Q08DJ8, F1MJX6, E1BD25, E1BG70, G3X6J7, E1BN44, F1MT98, G3N3S1, F1MQ55, F1N4K5, E1BLB9,…	1418	350	13095	1.55673	0.437949	0.0403191	0.967803
GOTERM_BP_DIRECT	GO:0051453~regulation of intracellular pH	12	0.621118	0.000634604	F1N798, E1BBL2, E1BKK3, A6QNW6, E1BBH7, Q58DD2, F1N4L1, F1N5D7, E1BD54, F1MQF9, E1BDR3, G5E545	1501	34	13824	3.25054	0.902864	0.372698	1.16203
KEGG_PATHWAY	bta04724:Glutamatergic synapse	22	1.13872	0.000641669	E1BQ12, P19754, Q8WN96, Q8WN95, E1BKK6, F1MTK5, F1MP46, P21146, F1MR40, G3X7P4, P10894, E1BHX7, G5E618, E1B9K3, F1MWI8, E1BK87, E1BKL6, F1MG30, A4FV52, F1N1E0, F1MDE0, A4IFJ5	658	113	7550	2.23391	0.153162	0.0183022	0.83499
KEGG_PATHWAY	bta04070:Phosphatidylinositol signaling system	20	1.0352	0.000668408	A6QLA2, A6QPT0, E1BE66, F1MHT2, E1BGA9, F1MN32, Q8WN96, Q8WN95, A2VDL5, A6QLT2, A7Z050, E1B7K6, A0A024QYS0, P10895, F1MBU9, P10894, E1BHX7, G5E5G8, E1BCV1, O02811	658	98	7550	2.34167	0.15901	0.0171685	0.869645
INTERPRO	IPR003598:Immunoglobulin subtype 2	36	1.86335	0.000680042	E1BJQ3, F1N3H2, A7MBJ4, E1BC44, F1MDD9, E1BAU3, F1MX14, G3MYY6, F1N2J5, E1BCW5, F1MWF1, E1BKL4, F1MNG8, F1MGX7, E1BNH9, F1MXJ6, E1BE71, E1BPK8, E1BGL8, F1N4K6, A6QP89, G3MZU6, A5PJP9, F1MM03, F1MJR2, E1BLM2, E1BE11, F1MPI1, G3N2T6, E1B9K4, F1MBT2, E1BBI3, E1BL94, F1N7L3, F1MER7, F1MWK8	1806	186	16802	1.80066	0.790122	0.0333702	1.18136
GOTERM_BP_DIRECT	GO:0003281~ventricular septum development	9	0.465839	0.000715872	F1N444, F1N6H1, E1BJ30, A5D7G2, F1MXE0, Q0V8E7, F1MWK8, Q08DS7, E1BL04	1501	20	13824	4.14444	0.927946	0.354926	1.30992
INTERPRO	IPR017986:WD40-repeat-containing domain	48	2.48447	0.000745874	F1MB52, F1MWB8, F1N0C0, F1MF64, A6QP14, P35605, E1BML0, A7MB12, F1MJS7, F1MC90, F1N1C9, F1ML22, E1BCH1, E1BM03, F1MLT6, A5D7H2, Q5BIM8, Q9XSC3, E1BLS3, Q3B7M6, Q0VBY8, Q32LP9, E1BH25, F1MG90, Q3MHH2, A7MB85, Q5E966, A6QLB5, F1MKR0, E1BDV4, E1BL55, E1BMD1, E1BL90, E1BKF9, Q29RM4, Q2HJH6, F1MWY0, F1MUW4, E1BCT7, F1MU26, E1BFN3, F1N3C8, Q9TTK4, E1BPY6, E1BJV8, G3X6I6, F1N406, A6H7I2	1806	273	16802	1.63577	0.819571	0.0357787	1.29502
INTERPRO	IPR011704:ATPase, dynein-related, AAA domain	7	0.362319	0.000793595	F1N724, G3N1C8, E1BDX8, F1MK55, E1BLB4, F1MSP8, E1B9R5	1806	12	16802	5.427	0.838302	0.0372474	1.37734
UP_KEYWORDS	Extracellular matrix	25	1.294	0.00083873	E1BEN9, Q28019, A4FV05, F1N2Y2, F1MJQ6, F1MTP1, P02453, Q32S24, A6QPB3, G3MXE4, P02459, F1MZU6, Q9GLX9, P52176, E1BPV7, P13213, Q9GLE5, F1N7Q7, O77656, A6H737, E1BCT7, Q9TT93, F1MJY9, P23206, O18767	1884	115	17808	2.05483	0.241868	0.0538739	1.13111
GOTERM_BP_DIRECT	GO:0001701~in utero embryonic development	32	1.65631	0.000848825	E1BPQ2, F1N215, M5FMX2, A4IFD2, E1BKI6, F1MTR3, F1MCY1, G3X6N5, E1BE01, F1MBH4, Q5E9J8, E1BHK2, F1MV76, Q0VCX4, F1MP12, A6QLJ0, E1BPM4, F1N607, F1MXE0, E1BI59, F1MB07, E1BAT5, F1MSK0, F1MV07, E1BMF4, F1MQK6, A7YY73, E1BNR0, E1BP59, A5D7Q4, Q27991, E1B6Z2	1501	159	13824	1.85356	0.955801	0.359547	1.5514
GOTERM_CC_DIRECT	GO:0005737~cytoplasm	381	19.7205	0.000933998	A7Z017, E1BEN9, A7Z018, E1B7V7, F1MLE1, E1B7V9, M5FMX2, A7MBJ5, Q0P5L0, F1MSJ5, F1MZM7, F1N264, F1N469, O97902, F1MNE5, F1MS60, A6QP02, A6QP00, Q3SYU9, E1B782, F1MBL6, Q3B7M7, F1MDH3, A6QR20, E1BND0, F1N1F1, Q5W9D7, A5PK86, E1BKD2, A4IFA0, F1MXE2, E1BAT5, E1BNU2, F1MSI2, E1BEM1, F1N1V3, F1N4I0, E1B8H0, A1YQ93, P10894, F1MEW3, E1BK77, F1N4Z5, E1BJV8, F1N1E0, E1B7E2, E1BMP3, E1BFC2, F1MFW9, E1B754,…	1648	3109	15461	1.1497	0.467306	0.0757069	1.39226
SMART	SM00248:ANK	44	2.27743	0.00098686	F1MB71, A7Z034, F1MYK8, E1BJK1, P79100, F1MAV4, F1MPE9, A7MBB7, F1MGH2, O97902, G3X812, Q08E59, F1MML3, F1MCA3, F1MMV0, E1BN43, G3X7P4, G5E5G8, A6QR20, A4IFL7, E1BFD6, E1BMY0, F1MBJ0, E1BAT5, F1N6C1, F1MSK0, E1BNU3, E1BMF4, E1B9S2, A0JN59, G3N3W0, E1BKN6, F1N1B8, F1MDC0, A7VJS4, F1MWG7, G3X8E4, F1N0U2, E1BP31, G5E618, F1MZ03, E1B8R5, E1BIJ3, A5PK11	1193	197	8740	1.63628	0.384172	0.0669116	1.40818
KEGG_PATHWAY	bta04912:GnRH signaling pathway	18	0.931677	0.0010065	E1BQ12, F1MT98, P19754, Q8WN96, Q8WN95, F1MTK5, F1N3T0, Q9GLE5, Q2HJF7, P10894, E1BHX7, E1BIM8, E1B847, F1N7C3, E1B9K3, F1N664, F1MG30, A4IFJ5	658	86	7550	2.40157	0.229577	0.0234316	1.30686
GOTERM_BP_DIRECT	GO:0021915~neural tube development	9	0.465839	0.00104726	E1BJ31, A7MB98, E1BJS7, F1MM55, E1BC86, F1MSA7, G3X6U1, F1MDL2, F1MP88	1501	21	13824	3.94708	0.978691	0.381882	1.91079
UP_SEQ_FEATURE	compositionally biased region:Gly-rich	11	0.569358	0.00106285	A7Z017, Q148H5, P09867, Q148H6, P19754, A6QPB3, Q1LZD9, Q59HJ6, A4FV57, A6QQ94, A2VEA3	351	57	6267	3.44564	0.743641	0.288439	1.71807
INTERPRO	IPR000014:PAS domain	10	0.517598	0.00106383	E1BC87, Q9BE97, E1BJM5, A4IFH3, E1BF56, E1BPY4, F1MB19, E1BLF5, E1B815, F1MVD0	1806	26	16802	3.57824	0.913082	0.0486306	1.84225
INTERPRO	IPR018159:Spectrin/alpha-actinin	10	0.517598	0.00106383	F1MQ44, F1MGT1, E1BLT3, F1MRT9, F1MYC9, F1MXJ6, E1BK14, F1MF78, E1BFB0, F1MMQ8	1806	26	16802	3.57824	0.913082	0.0486306	1.84225
GOTERM_MF_DIRECT	GO:0000981~RNA polymerase II transcription factor activity, sequence-specific DNA binding	31	1.60455	0.00109934	E1BPQ1, E1BC87, A7Z034, F1MP14, Q2KJC1, E1BPH8, A6QPT6, E1BQ00, E1BA84, M5FMX2, F1MZB6, A7MBB7, A0JNC9, F1MB19, A4IFD2, E1B7Q6, A7MB80, A4IFA3, F1MVT0, F1MT98, Q6VFT7, G3MX55, F1N4K5, F1MW83, F1MBB0, A7YY54, E1BMJ6, E1BIV1, E1B8C0, F1N4Z5, E1B815	1418	155	13095	1.84697	0.63928	0.0657178	1.70637
INTERPRO	IPR015880:Zinc finger, C2H2-like	73	3.77847	0.00115733	F1MVH9, Q95LI3, E1BPQ2, F1N0E1, F1MWD7, A6QNV5, E1BHU5, F1N790, A0JNC9, F1MC90, F1N264, A7MAY9, E1B842, G3N2D0, E1BGD3, A6QNZ1, F1MJD3, F1MLJ0, F1MIV1, F1MFQ4, E1BGQ4, G5E6Q2, E1BN65, B2CML0, E1BJ30, F1MMF1, G3N0N0, E1BCA0, F1N0Y9, F1N7E7, E1BF46, F1N4I0, F1MI25, F1ML16, Q29RN3, F1MUJ5, F1MDR1, F1N4Z5, E1BMR6, F1MW46, A6QQG2, E1B9B2, F1MIB3, F1N215, E1BQ01, A6QPT6, E1BFC1, A7Z030, F1MPW8, F1MZB7,…	1806	469	16802	1.44808	0.929884	0.0517642	2.00262
GOTERM_CC_DIRECT	GO:0005578~proteinaceous extracellular matrix	34	1.75983	0.00117896	E1BEN9, O18977, A4FV05, A7MB84, F1MVP0, E1BCW5, F1N2J5, Q32S24, A6QPB3, G3MXE4, A5D7R1, E1BG04, A5D7T2, P02459, E1BI98, E1BLS8, F1MLJ7, E1BK30, F1MGK5, F1N2M2, Q9GLX9, F1MD40, E1BB91, P52176, F1N303, O77656, Q9GLE5, E1BCT7, Q9TT93, E1B818, P23206, O18767, E1BI72, F1MZD0	1648	179	15461	1.78199	0.54846	0.0845535	1.75441
KEGG_PATHWAY	bta04022:cGMP-PKG signaling pathway	27	1.39752	0.00117946	F1N551, E1BMP3, F1MGR9, E1BNX4, F1MJE0, A4FUY2, P98201, Q8SQ19, F1MYE0, A7MB80, E1BHX7, E1BQ12, P19754, F1MSU2, Q8WN96, Q8WN95, E1BJP4, F1MTK5, P27925, Q00194, P10894, Q9TT96, F1MGG8, Q0VCY0, E1B9K3, Q28156, F1N7J2	658	159	7550	1.94844	0.263364	0.0251501	1.52984
SMART	SM00146:PI3Kc	8	0.414079	0.0012321	F1MBU9, E1BE66, F1MBL6, E1BFB4, E1BKJ5, O02811, E1BLB6, F1MLY7	1193	14	8740	4.18632	0.454109	0.0728751	1.75525
INTERPRO	IPR000885:Fibrillar collagen, C-terminal	6	0.310559	0.00123598	P02453, Q32S24, P02459, F1N2Y2, F1MJQ6, F1MTP1	1806	9	16802	6.20229	0.941477	0.0541333	2.13735
KEGG_PATHWAY	bta03460:Fanconi anemia pathway	13	0.672878	0.00136242	E1B6X8, Q2KHY5, A6QQB5, E1BDI4, E1BL90, E1B8J2, F1MLY7, F1N787, E1BPY8, A0JN73, F1N7Q0, Q32PI0, E1B8X8	658	52	7550	2.86854	0.297498	0.0267965	1.76521
KEGG_PATHWAY	bta04910:Insulin signaling pathway	24	1.24224	0.00140448	E1BPQ1, F1MT98, B0JYK8, A6QPT0, E1BE66, G3X778, A9CR99, A7MBJ4, E1B716, F1MJE0, Q2KJJ9, E1BNT2, E1BHP3, E1BLN7, P00515, F1MYE0, F1MGG8, Q9TTS3, F1N7C3, F1N510, F1MRH8, E1BCV1, E1BFB4, Q0VCF1	658	136	7550	2.02485	0.30512	0.0256661	1.81924
KEGG_PATHWAY	bta04152:AMPK signaling pathway	22	1.13872	0.00143566	E1BPQ1, B0JYK8, A6QPT0, Q58DK1, E1BE66, F1N4K5, A9CR99, A1A4J1, E1BNX4, E1BEM1, F1MJE0, Q2KJJ9, E1BNT2, P27925, E1BCW3, Q8SQ19, F1MYE0, F1MGG8, Q9TTS3, O97790, E1BCV1, E1BFB4	658	120	7550	2.1036	0.310717	0.0245017	1.85928
INTERPRO	IPR008979:Galactose-binding domain-like	18	0.931677	0.00157065	E1BJ31, F1MYL5, E1BH40, Q28107, E1BK00, E1BEJ2, F1N6H6, E1BNA9, A5D7A3, Q29444, F1N0T1, E1BM39, F1MD77, E1B782, E1BMX5, A3KN30, Q9GLR1, E1BND2	1806	73	16802	2.294	0.97288	0.0670229	2.70863
SMART	SM00339:FH	13	0.672878	0.00158389	E1BPQ1, Q6VFT7, F1N694, G3MX55, F1MP14, E1BIV1, F1MW83, F1N4K5, E1B8C0, F1MZB6, F1MBH4, F1MVT0, A4IFD2	1193	35	8740	2.72111	0.540816	0.0828446	2.25112
INTERPRO	IPR003593:AAA+ ATPase domain	27	1.39752	0.00161019	F6RLQ6, G3X7J5, Q3SX23, E1B8F6, E1B9R5, F1MNE5, F1N5R7, A4FUE2, F1N3B9, G3MWN6, F1MSP8, F1N3Y6, F1N724, G5E593, A7Z044, E1BKR6, G3N3W5, G3MW11, F1MK55, E1BK38, F1MHF3, E1BCG1, F1MFP1, Q59HJ6, F1MIP7, E1BDX8, G5E556	1806	132	16802	1.90297	0.975236	0.0674017	2.77592
INTERPRO	IPR012337:Ribonuclease H-like domain	15	0.776398	0.00161498	Q6T5B7, F1MFU7, E1BEB8, G3X7K6, G3N054, E1BJF4, E1BML0, A0A0K1LCB1, F1MX66, E1BEQ0, A6QLH5, E1BPY8, A4IFA3, Q2YDK1, Q2T9U5	1806	55	16802	2.5373	0.975507	0.0663858	2.78405
GOTERM_BP_DIRECT	GO:0006357~regulation of transcription from RNA polymerase II promoter	43	2.22567	0.00165378	A7Z017, A7Z034, Q2KJC1, F1MB52, Q95141, A6QPT6, G3N054, E1BFC1, E1BQ00, E1BGA9, E1BA84, A4FUA9, E1B9T6, A7MBB7, E1BNL6, F1N4J1, A0JNC9, F1MB19, F1N1C9, E1BIZ7, G5E5C7, E1BLS1, E1BFK8, A7MB80, A4IFA3, A7MB60, Q3B7M7, G3MWN6, E1BCL1, F1MT98, Q9TTA5, G3X7K6, A7MB41, F1MWE1, F1N7E7, F1MBB0, E1BFW7, A5D7M0, A7YY73, E1BLT2, F1N4Z5, E1B7H9, E1B815	1501	244	13824	1.62305	0.99771	0.491091	3.00158
INTERPRO	IPR003152:PIK-related kinase, FATC	5	0.258799	0.00166545	F1MBL6, E1BFB4, E1BKJ5, E1BLB6, F1MLY7	1806	6	16802	7.75286	0.97819	0.0671891	2.86988
INTERPRO	IPR014009:PIK-related kinase	5	0.258799	0.00166545	F1MBL6, E1BFB4, E1BKJ5, E1BLB6, F1MLY7	1806	6	16802	7.75286	0.97819	0.0671891	2.86988
GOTERM_MF_DIRECT	GO:0008821~crossover junction endodeoxyribonuclease activity	5	0.258799	0.00171091	E1B8D0, F1N7Q0, E1B8J2, Q32PI0, Q08DH8	1418	6	13095	7.6957	0.795537	0.094448	2.64378
INTERPRO	IPR001356:Homeodomain	36	1.86335	0.00176553	F1N0Z3, E1BNZ8, Q2TEA4, F1N693, E1BAG4, E1BPC7, E1B9T6, E7E1K7, F1MPW8, F1MNA3, E1BL43, F1N264, F1MJX6, A4FV76, E1BG70, E1BGM6, F1MZE3, E1BCL1, F1N3B5, F1MT17, Q1LZF1, G3N3S1, F1MQ55, A7MB41, F1N7E7, E1BLB9, E1BAD7, F1MKX5, E1B855, E1BD77, E1BMT1, A6H796, F1MIH1, E1BCZ9, E1B7H9, Q08DG7	1806	196	16802	1.70879	0.982673	0.0698592	3.03984
SMART	SM00180:EGF_Lam	12	0.621118	0.0017965	F1N0T1, F1MD77, F1MHH5, F1N6Y9, E1BJ11, F1MSI2, F1MYX9, F1MER7, E1BPS6, E1BP05, E1B9M8, E1BGE0	1193	31	8740	2.8359	0.586407	0.0845022	2.54967
KEGG_PATHWAY	bta04930:Type II diabetes mellitus	12	0.621118	0.00189474	A6QPT0, F1MYE0, E1BKR6, F1MGG8, E1BE66, E1BCV1, E1BFB4, F1MJE0, F1MTK5, F1MR37, G3X7Z2, F1N1E0	658	47	7550	2.92957	0.38811	0.0302337	2.44705
KEGG_PATHWAY	bta00310:Lysine degradation	13	0.672878	0.00192776	E1BGK8, G3N163, F1N0V8, O62828, E1BKN0, F1MFD2, E1BLX2, F1N6Y5, F1MMY4, F1MWG1, E1BGA4, A5PK11, E1B9N8	658	54	7550	2.7623	0.393331	0.0289704	2.4892
GOTERM_MF_DIRECT	GO:0003777~microtubule motor activity	15	0.776398	0.00207156	F1N724, F1N1K6, E1BBY6, G3N1E4, F1MK55, E1BLB4, E1BC41, E1B9R5, G3N1C8, F1N5R7, Q2KII9, E1BDX8, F1MSP8, Q29RT6, A7MBA1	1418	56	13095	2.47362	0.853733	0.106919	3.19265
INTERPRO	IPR011539:Rel homology domain	6	0.310559	0.00225372	P98201, A7Z034, F1MGR9, F1MSU2, A7MBB7, F1MBB0	1806	10	16802	5.58206	0.994361	0.08684	3.86488
GOTERM_MF_DIRECT	GO:0000979~RNA polymerase II core promoter sequence-specific DNA binding	13	0.672878	0.0023611	Q08DJ8, E1BPQ2, Q5EAB2, E1BI59, A4FUA9, M5FMX2, Q08E53, E1BPP7, E1B9T7, E1BLZ5, E1BK81, E1BN44, Q1LZF1	1418	45	13095	2.66784	0.888232	0.114622	3.63122
UP_KEYWORDS	Homeobox	35	1.81159	0.00236223	F1N0Z3, E1BNZ8, Q2TEA4, F1N693, E1BAG4, E1BPC7, E1B9T6, E7E1K7, F1MPW8, F1MNA3, E1BL43, F1N264, F1MJX6, A4FV76, E1BG70, E1BGM6, F1MZE3, E1BCL1, F1N3B5, F1MT17, Q1LZF1, G3N3S1, F1MQ55, A7MB41, E1BLB9, E1BAD7, F1MKX5, E1BD77, E1B855, E1BMT1, A6H796, F1MIH1, E1BCZ9, E1B7H9, Q08DG7	1884	195	17808	1.69655	0.541803	0.121971	3.15543
INTERPRO	IPR005821:Ion transport domain	22	1.13872	0.00248447	E1BDC5, E1BIS4, P79100, F1MW86, F1MWK1, Q8WN96, E1BF56, Q8WN95, F1MTK5, F1MQF9, F1MR37, Q00194, F1MPU3, A7VJS4, E1BDQ4, E1BC13, F1MMU9, A4FV89, G3X7Z2, M0QW12, F1N1E0, E1BK43	1806	102	16802	2.00662	0.996684	0.0937412	4.25255
GOTERM_MF_DIRECT	GO:0001228~transcriptional activator activity, RNA polymerase II transcription regulatory region sequence-specific binding	18	0.931677	0.00267252	A7Z017, F1N551, F1N694, F1N4K5, F1MXG5, E1BI59, A4FUA9, E1B9T6, F1N4J1, F1MC39, E1BI80, A5D965, F1MTI9, E1BFK8, A7YY73, F1MBH4, E1B7H9, F1MFE5	1418	76	13095	2.1872	0.916319	0.122401	4.10085
INTERPRO	IPR009057:Homeodomain-like	44	2.27743	0.00270186	F1N0Z3, E1BNZ8, Q2TEA4, Q2KJC1, F1N693, E1BFC1, E1BQ00, E1BAG4, E1BPC7, E1B9T6, E7E1K7, F1MPW8, F1MNA3, E1BL43, F1MGR3, F1N264, E1BLU4, F1MJX6, Q0VCT3, A4FV76, E1BG70, E1BGM6, F1MZE3, E1BCL1, F1N3B5, F1MT17, Q1LZF1, G3N3S1, F1MGM4, F1MQ55, G3X7K5, E1BLB9, A7MB41, E1BAD7, F1MKX5, E1B855, E1BD77, E1BMT1, G3MY25, A6H796, E1BCZ9, F1MIH1, E1B7H9, Q08DG7	1806	260	16802	1.57443	0.997989	0.0998914	4.6164
KEGG_PATHWAY	bta00562:Inositol phosphate metabolism	15	0.776398	0.00280151	A6QLA2, A6QPT0, E1BE66, F1MHT2, E1BNT8, F1MN32, A2VDL5, A6QLT2, A0A024QYS0, P10895, F1MF11, F1MBU9, P10894, E1BHX7, O02811	658	71	7550	2.42412	0.516454	0.0395633	3.59847
GOTERM_BP_DIRECT	GO:0034097~response to cytokine	9	0.465839	0.00281413	A7Z034, P48044, A7MBB7, F1MBB0, G3X6U1, E1BPP7, E1BJP4, Q3SYZ2, A7YY54	1501	24	13824	3.4537	0.999968	0.644805	5.05651
SMART	SM00239:C2	28	1.44928	0.00282273	A5D784, Q08DB4, E1BNT8, F1N3U6, F1MBT5, E1BKQ2, F1MBU9, E1BHX7, E1BMQ1, E1B8U8, F1N415, F1MP30, A4IFJ5, E1BH60, E1BB77, F1N0W4, F1N3I4, F1MLS5, P10895, F1MF11, P10894, F1MMM4, F1MBI8, E1BJ18, P09851, E1BJ13, Q28013, F1MG30	1193	115	8740	1.78374	0.750406	0.118539	3.97888
GOTERM_BP_DIRECT	GO:0043524~negative regulation of neuron apoptotic process	20	1.0352	0.00282668	B0JYK8, P45478, F1MB07, A5PJP9, E1B9T6, A7YY44, Q08E53, E1BLZ5, Q3T0G8, G3N348, F1MBI8, E1B7S6, A6H796, F1MX24, F1MIY8, P09851, E1BMX5, E1BCZ9, G3X6J7, F1N1E0	1501	89	13824	2.06963	0.999969	0.611395	5.07851
UP_KEYWORDS	Collagen	15	0.776398	0.002836	A4FV05, F1MKP1, A7E303, F1N7Q7, P02453, Q9GLE5, A5PJL8, Q32S24, A6QPB3, F1MJY9, P02459, P23206, F1MZU6, E1BLS8, Q2KIT0	1884	59	17808	2.40311	0.608281	0.125311	3.77708
GOTERM_CC_DIRECT	GO:0000785~chromatin	16	0.828157	0.00292425	E1BFC2, E1BJF4, E1BQ37, G3X6R3, E1BEK9, E1BLK1, F1MC39, F1N7G8, F1MMW4, F1MM81, E1BJX5, F1MCA8, G3X6J7, F1MNL8, E1BF96, E1BKC4	1648	65	15461	2.30934	0.861076	0.179124	4.29889
KEGG_PATHWAY	bta04925:Aldosterone synthesis and secretion	16	0.828157	0.0029575	E1BQ12, P19754, E1BNX4, Q8WN96, Q8WN95, Q08E53, P34974, F1MTK5, P27925, A4FUY2, F1MR37, Q2HJF7, Q8SQ19, P10894, E1BHX7, E1B9K3	658	79	7550	2.32388	0.535655	0.0395709	3.79527
SMART	SM00091:PAS	9	0.465839	0.00321415	E1BC87, Q9BE97, E1BJM5, A4IFH3, E1BPY4, F1MB19, E1BLF5, E1B815, F1MVD0	1193	20	8740	3.29673	0.794167	0.123417	4.51884
KEGG_PATHWAY	bta05146:Amoebiasis	20	1.0352	0.00341508	A7Z034, F1N102, A6QPT0, P19754, E1BE66, F1N2Y2, F1MYX9, F1MJQ6, F1MTP1, F1N7Q7, P02453, F1N0T1, F1MD77, Q32S24, P10894, E1BHX7, F1MJY9, P02459, E1BCV1, F1MZU6	658	112	7550	2.04896	0.587706	0.043334	4.37045
GOTERM_BP_DIRECT	GO:0007420~brain development	19	0.983437	0.00345172	F1MB52, F1N4K6, P45478, Q2YDD2, F1N1Q2, G3X755, E1BJ34, F1MJE0, A6QQ94, F1MBT5, E1BLB6, F1MXZ6, E1B7Q6, F1MFP1, E1BDF9, Q2TLZ3, E1BKC4, E1B8X8, E1B7Y3	1501	84	13824	2.08318	0.999997	0.652969	6.16805
INTERPRO	IPR004939:Anaphase-promoting complex, subunit 10/DOC domain	5	0.258799	0.00355535	E1BM39, E1BH40, E1BK00, E1B782, E1BNA9	1806	7	16802	6.64531	0.999718	0.127362	6.03241
KEGG_PATHWAY	bta04024:cAMP signaling pathway	30	1.5528	0.00356274	A7Z034, E1BIS4, F1N215, A6QPT0, E1BE66, E1BNX4, A7YY44, P34974, E1BE22, F1MR40, P98201, Q8SQ19, E1BK87, E1BQ12, A6H7G9, P19754, F1MW86, F1MZC9, F1MP46, F1MTK5, P27925, Q00194, Q2HJF7, F1MMU1, Q9TT96, E1B9K3, F1MWI8, E1BCV1, F1MD32, F1N7J2	658	198	7550	1.73851	0.60323	0.0430642	4.55538
SMART	SM00038:COLFI	6	0.310559	0.00365988	P02453, Q32S24, P02459, F1N2Y2, F1MJQ6, F1MTP1	1193	9	8740	4.88405	0.83475	0.129323	5.13028
GOTERM_BP_DIRECT	GO:0000209~protein polyubiquitination	18	0.931677	0.0036721	E1BLB1, F1MEX6, E1BP63, E1BNY9, F1MDC0, E1BBP0, F1MLS5, A5PKG6, Q1RML1, Q5BIM8, E1BP22, E1B8R5, Q0VBY8, E1BJV8, E1BMY0, A6QNS2, F1N0L2, A2VEA3	1501	78	13824	2.12535	0.999999	0.64634	6.54939
GOTERM_BP_DIRECT	GO:0021798~forebrain dorsal/ventral pattern formation	5	0.258799	0.00368821	G3N3S1, F1N215, E1BMT1, A7MB60, Q1LZF1	1501	7	13824	6.57847	0.999999	0.620696	6.57721
GOTERM_CC_DIRECT	GO:0005634~nucleus	348	18.0124	0.00375153	A7Z017, F1N0Z3, Q2TEA4, F1MLE1, F1N4J1, A7MBJ5, Q0P5L0, Q24K09, F1MNE5, E1BGD3, A6QP00, Q3SYU9, E1BIM8, E1B782, F1MBL6, Q3B7M7, G3N346, A6QR23, A6QR20, F1MVT0, F1N1F1, Q5W9D7, E1B864, E1BPM4, E1BKD2, E1BAT5, F1MWE1, E1BNU2, F1N4I0, F1MPV5, A4IFP2, Q5E9B6, A1YQ93, Q9GLE5, A7MB98, F1N4Z5, E1BK76, F1MW46, F1MMY4, E1B7H9, F1N3D4, F1N1E0, F1MG84, E1BFC2, E1B7X9, G5E5W9, A5PK74, F1MPW8, E1B9T6, Q3SZD1,…	1648	2873	15461	1.13638	0.920602	0.205704	5.48338
INTERPRO	IPR001025:Bromo adjacent homology (BAH) domain	6	0.310559	0.00376812	F1MM81, E1BNH8, E1BLK1, E1BGA4, F1MGR3, Q24K09	1806	11	16802	5.0746	0.999827	0.132409	6.38232
INTERPRO	IPR023413:Green fluorescent protein-like	6	0.310559	0.00376812	E1B9K4, F1MYW1, E1BE11, E1BNJ1, P48733, F1MNH3	1806	11	16802	5.0746	0.999827	0.132409	6.38232
INTERPRO	IPR008967:p53-like transcription factor, DNA-binding	12	0.621118	0.00391092	P98201, A7Z034, E1BLY0, F1MBJ6, F1MGR9, F1MSU2, A7MBB7, F1MBB0, E1BPP7, G3X6J7, F1N4M2, E1BK81	1806	42	16802	2.65812	0.999876	0.135022	6.61648
UP_SEQ_FEATURE	metal ion-binding site:Calcium 2; via carbonyl oxygen	6	0.310559	0.00407755	Q9GLE5, O77656, P10895, Q0VCY0, P52176, P57709	351	20	6267	5.35641	0.994646	0.648655	6.44173
UP_KEYWORDS	DNA-binding	110	5.69358	0.00409584	A7Z017, Q2TEA4, F1N0Z3, E1BAG4, F1N4J1, F1N264, Q24K09, P98201, A4IFH3, E1BGM6, F1MZE3, F1MVT0, F1N3B5, Q08DH8, Q2KHY5, A7MB41, Q5E9B6, Q9BE97, Q08E27, E1BIV1, E1BK76, F1MIH1, E1B7H9, Q08DG7, F1MJM0, F1MP14, E1B7X9, F1MPW8, E1B9T6, Q08E53, A6QLQ3, A6QQ94, F1MTI9, F1MJX6, F1MBJ6, E1BG70, Q0VBY8, F1MT17, Q1LZF1, F1MT98, Q6VFT7, E1BDK1, E1BLB9, P27925, G3N351, G3MY25, A7YY73, Q0VCC5, A0JN73, E1BCZ9,…	1884	806	17808	1.29001	0.741898	0.155745	5.4122
SMART	SM01343:SM01343	5	0.258799	0.00410662	F1MBL6, E1BFB4, E1BKJ5, E1BLB6, F1MLY7	1193	6	8740	6.10506	0.867411	0.134391	5.73945
KEGG_PATHWAY	bta05161:Hepatitis B	24	1.24224	0.00430037	F1MT98, A7Z034, A6QPT0, Q4JF29, E1BE66, F1MGR9, F1MSU2, E1BNX4, E1BNU2, Q645M6, P52176, P27925, A4FUY2, F1MUW4, P98201, A0A024QYS0, Q8SQ19, E1B847, E1BIM8, E1BCV1, F1MD32, E1BPP7, F1MER7, Q0VBY8	658	148	7550	1.86068	0.672477	0.0494707	5.47425
GOTERM_MF_DIRECT	GO:0004222~metalloendopeptidase activity	21	1.08696	0.00473946	E1BK30, F1N2M2, F1MFA3, Q0P5M8, P52176, F1N7Z6, F1N2Q4, E1BKS5, E1BF00, F1N303, Q9GLE5, O77656, F1MVP0, Q9TT93, F1MIY8, A5D7M5, G1K1H0, O18767, E1BI72, F1MRA8, M5FK68	1418	100	13095	1.93932	0.987771	0.197639	7.16391
GOTERM_BP_DIRECT	GO:0035904~aorta development	7	0.362319	0.00494727	F1N4C5, F1N444, F1N6H1, E1BJ30, A5D7G2, Q27991, Q08DS7	1501	16	13824	4.02931	1	0.70312	8.72723
UP_SEQ_FEATURE	domain:Hemopexin-like 3	4	0.207039	0.00510702	Q9GLE5, O77656, O18767, P52176	351	7	6267	10.2027	0.998575	0.664552	8.00535
UP_SEQ_FEATURE	domain:Hemopexin-like 4	4	0.207039	0.00510702	Q9GLE5, O77656, O18767, P52176	351	7	6267	10.2027	0.998575	0.664552	8.00535
UP_SEQ_FEATURE	domain:Hemopexin-like 2	4	0.207039	0.00510702	Q9GLE5, O77656, O18767, P52176	351	7	6267	10.2027	0.998575	0.664552	8.00535
UP_SEQ_FEATURE	domain:Hemopexin-like 1	4	0.207039	0.00510702	Q9GLE5, O77656, O18767, P52176	351	7	6267	10.2027	0.998575	0.664552	8.00535
UP_SEQ_FEATURE	repeat:WD 5	11	0.569358	0.00512508	Q2HJH6, Q5E966, A5D7H2, Q5BIM8, Q9XSC3, Q3B7M6, A7MB12, P35605, Q9TTK4, Q0VBY8, Q32LP9	351	70	6267	2.80574	0.998608	0.609203	8.03257
SMART	SM00490:HELICc	25	1.294	0.00521017	E1BLB1, E1BAN8, Q9TTA5, F1N734, A5D786, E1BPM4, E1BGI6, E1B7X9, F1MLB1, F1MNA1, E1BEK4, A3KN07, Q2NKY8, A7MB49, F1MMK3, F1MEM4, E1BDZ3, E1BC33, E1BCV0, F1N3F6, Q28141, A5PKK5, F1N507, F1MFR1, E1BH78	1193	103	8740	1.77817	0.923072	0.157172	7.22868
SMART	SM00317:SET	12	0.621118	0.0052829	G3N163, E1BJ30, E1BKN0, F1MFD2, F1N790, E1BLX2, E1BBB5, F1N6Y5, F1MMY4, E1BGA4, A5PK11, E1B9N8	1193	35	8740	2.51179	0.925784	0.150025	7.32605
GOTERM_BP_DIRECT	GO:0051726~regulation of cell cycle	16	0.828157	0.00546871	E1BGK8, E1BB52, E1BBV0, A4IFA0, E1BNT2, A7YY54, F1MBT5, F1MCY2, F1MNE5, E1BCU5, G3MX91, A5D7M0, E1BIM8, E1BMR3, E1BJV8, E1BE82	1501	68	13824	2.16703	1	0.716021	9.6039
SMART	SM00150:SPEC	10	0.517598	0.0055993	F1MQ44, F1MGT1, E1BLT3, F1MRT9, F1MYC9, F1MXJ6, E1BK14, F1MF78, E1BFB0, F1MMQ8	1193	26	8740	2.81772	0.936517	0.149708	7.74857
KEGG_PATHWAY	bta04918:Thyroid hormone synthesis	14	0.724638	0.00586759	E1BQ12, P19754, E1BNX4, Q8WN96, Q8WN95, Q29RV1, P27925, P01267, A4FUY2, Q8SQ19, F1N6H1, P10894, E1BHX7, E1B9K3	658	69	7550	2.32809	0.782201	0.0641207	7.39947
INTERPRO	IPR015359:Phospholipase C, phosphoinositol-specific, EF-hand-like	6	0.310559	0.00589277	E1BH60, F1MF11, P10895, P10894, E1BHX7, E1BNT8	1806	12	16802	4.65172	0.999999	0.193701	9.80963
SMART	SM00487:DEXDc	25	1.294	0.00592146	E1BLB1, E1BAN8, Q9TTA5, F1N734, A5D786, E1BPM4, E1BGI6, E1B7X9, F1MLB1, F1MNA1, E1BEK4, A3KN07, Q2NKY8, A7MB49, F1MMK3, F1MEM4, E1BDZ3, E1BC33, E1BCV0, F1N3F6, Q28141, A5PKK5, F1N507, F1MFR1, E1BH78	1193	104	8740	1.76107	0.945854	0.149562	8.17692
GOTERM_CC_DIRECT	GO:0005581~collagen trimer	14	0.724638	0.00601738	E1BB91, A4FV05, F1MKP1, A7E303, F1N7Q7, P02453, Q9GLE5, A5PJL8, Q32S24, A6QPB3, P23206, F1MZU6, E1BLS8, Q2KIT0	1648	57	15461	2.30427	0.982888	0.287515	8.65793
GOTERM_MF_DIRECT	GO:1990841~promoter-specific chromatin binding	6	0.310559	0.00607481	A5D7M0, E1BPM4, E1BJG5, F1N4J1, E1BMR3, Q24K09	1418	12	13095	4.61742	0.996477	0.235839	9.09386
INTERPRO	IPR013761:Sterile alpha motif/pointed domain	21	1.08696	0.00620575	F1MB71, E1BJ31, F1MW98, E1BEZ3, F1N6H6, E1BKK6, F6R8E7, E1BMF4, F1MQL7, F1N3W6, F1N3R6, G3X7P4, E1BHH0, E1BKW5, Q58CP9, G5E618, E1B8R5, G3X6J7, E1BMY0, E1BIJ3, E1BM00	1806	103	16802	1.89682	0.999999	0.200067	10.3044
UP_SEQ_FEATURE	topological domain:Extracellular	45	2.32919	0.00632232	Q6URK6, Q1KZG0, Q95141, P79100, F1N1Q2, A7YY44, A7MBJ4, A6QLE6, Q29397, Q29RN8, P34974, Q0V8E7, A6QLK4, A5PJQ2, Q29S03, Q58CP9, A6QPB3, O18875, P49259, Q27981, A4FV52, P58353, Q3SX17, P85521, P19754, A1A4J6, Q5BIR3, A6QNW6, F1MR22, Q8WN96, A6QLF8, Q8WN95, G5E6I3, G3N1F4, Q0IIL2, Q3ZC80, Q00194, G3N2T6, Q6R4Q5, Q3ZCD0, Q9TT96, P48044, F1MQT9, G1K1H0, Q58DD2	351	540	6267	1.48789	0.999702	0.637519	9.81966
GOTERM_CC_DIRECT	GO:0014069~postsynaptic density	15	0.776398	0.00658699	P06836, E1BDM5, E1BNL7, F1MP46, F6R8E7, F1MSJ5, F1MBT5, G3X7P3, E1BIV2, F1MCA7, F1N590, E1BMN9, F1N415, F1MDF3, F1MDE0	1648	64	15461	2.19883	0.988372	0.290106	9.44017
GOTERM_BP_DIRECT	GO:0061158~3'-UTR-mediated mRNA destabilization	5	0.258799	0.00674525	Q5W9D7, A7MB98, E1BJS7, F1MV20, E1BEK9	1501	8	13824	5.75616	1	0.768299	11.7166
SMART	SM00360:RRM	39	2.01863	0.00679888	B0JYK8, F1MY44, F1MYS7, F1MTX3, A7YW33, E1BB24, F1MYK6, E1BP74, E1B8K2, E1BAK6, F1MSH0, G3N361, Q0P5L0, Q3ZBP3, A4IF81, P09867, E1BFX6, F1MRB9, Q0P5D2, G1K177, Q5EA36, Q0V898, Q2T9U5, Q1JPD6, E1BCC3, Q1LZD9, E1BQ37, E1BLX2, F1N6Y5, F1MND5, A4FUZ2, F1MFZ9, Q2KI24, F1N6W2, G3MX91, E1BIB4, E1BLT2, A6QQP0, F1N2C2, Q2HJD4	1193	187	8740	1.5279	0.964903	0.161631	9.33421
SMART	SM00228:PDZ	29	1.50104	0.00682575	F1MDV3, E1BDC7, E1BFV9, E1B7V9, E1B754, E1BHF6, E1BKK6, G3MZZ8, F1MCK2, E1BJQ7, G3X7P4, F1MCA7, F6RHP0, F1MMT3, F1N415, F1N1Q7, F1N0Y1, A6QPH2, E1BK33, F1N2X3, E1BKT3, F1MZA2, F6R8E7, E1BM96, F1MZ23, G5E618, Q3MHE0, E1BLF1, A4IFK4	1193	128	8740	1.65981	0.965367	0.15477	9.36944
INTERPRO	IPR000219:Dbl homology (DH) domain	15	0.776398	0.00709757	F1MQ44, F1MNV2, F1MQ30, Q8WN95, E1BK14, F1MZA2, F1MBT5, Q29RM4, F1N657, F1N7C3, E1BIL8, F1MXJ6, F1MSU8, F1MDF3, F1N1Q7	1806	64	16802	2.18049	1	0.222361	11.7002
UP_KEYWORDS	Calcium transport	12	0.621118	0.00727769	Q0VCY0, Q58CP9, P79100, Q8WN96, Q8WN95, F1N7J2, Q08E24, F1MTK5, F1MR37, G3X7Z2, F1N1E0, P57709	1884	46	17808	2.4658	0.910222	0.234958	9.42801
INTERPRO	IPR002909:Cell surface receptor IPT/TIG	9	0.465839	0.00757615	P98201, F1N4C5, A7Z034, E1BK86, G3X755, F1MGR9, F1MSU2, A7MBB7, F1MBB0	1806	28	16802	2.99039	1	0.232369	12.4407
INTERPRO	IPR000299:FERM domain	12	0.621118	0.00817457	E1BEL4, F1N2X3, A6QLS6, F1MG13, F1MCX4, F1MH50, A6QPQ3, F1MDH3, G3MZZ8, E1BCP6, F1MLR9, F1MQI1	1806	46	16802	2.42698	1	0.245093	13.3585
GOTERM_BP_DIRECT	GO:0030198~extracellular matrix organization	16	0.828157	0.00828077	A6QLJ0, F1N694, O18977, A4FV05, A7MBB7, P52176, A7MBK1, F1MTP1, G3N319, E1B818, A5D7R1, F1MJY9, P02459, A5D7T2, F1MBH4, E1BLS8	1501	71	13824	2.07546	1	0.816726	14.196
UP_SEQ_FEATURE	repeat:WD 3	11	0.569358	0.00836822	Q2HJH6, Q5E966, A5D7H2, Q5BIM8, Q9XSC3, Q3B7M6, A7MB12, P35605, Q9TTK4, Q0VBY8, Q32LP9	351	75	6267	2.61869	0.999979	0.697343	12.7983
UP_SEQ_FEATURE	repeat:WD 4	11	0.569358	0.00836822	Q2HJH6, Q5E966, A5D7H2, Q5BIM8, Q9XSC3, Q3B7M6, A7MB12, P35605, Q9TTK4, Q0VBY8, Q32LP9	351	75	6267	2.61869	0.999979	0.697343	12.7983
SMART	SM01337:SM01337	5	0.258799	0.0085502	E1BM39, E1BH40, E1BK00, E1B782, E1BNA9	1193	7	8740	5.23291	0.985245	0.181901	11.6037
INTERPRO	IPR006153:Cation/H+ exchanger	6	0.310559	0.00873809	F1N798, E1BBL2, E1BFC4, F1N5D7, F1MQF9, G5E545	1806	13	16802	4.29389	1	0.256366	14.2145
GOTERM_BP_DIRECT	GO:0033077~T cell differentiation in thymus	8	0.414079	0.00894391	E1BEN9, A7MB98, F1MV20, E1BD25, F1MB07, Q645M6, Q0VCX4, E1BLB6	1501	23	13824	3.20343	1	0.823913	15.2463
GOTERM_BP_DIRECT	GO:0001578~microtubule bundle formation	8	0.414079	0.00894391	E3W9A2, F1MEA7, A4IFA0, F1MEW3, E1BJ18, Q58DM2, F1MRT3, Q29RT6	1501	23	13824	3.20343	1	0.823913	15.2463
INTERPRO	IPR013783:Immunoglobulin-like fold	84	4.34783	0.00901794	O18977, E1BJQ3, Q95141, F1MPN0, G5E587, F1MGR9, E1B8X1, F1MSV1, E1BC44, A7MBB7, A7MBJ4, F1N6H6, F1MTF9, F1MDD9, E1BPU9, E1BBE9, F1MX14, P98201, F1MLR3, G3MYY6, E1BCW5, F1N3R6, F1N2J5, A7MBC4, E1BCJ9, E1BNH9, E1BPZ1, V6F9B3, F1N4C5, E1BJ31, E1B864, E1BDM5, E1B7H2, A6QP89, F1MGK5, E1BB91, F1MSU2, F1MR22, E1BLM2, F1MBB0, E1BE11, F1MPI1, F1MBT2, Q3ZCH5, E1BBI3, F1MGK8, F1MER7, E1BPQ9, G3MYX8, A6QLV9,…	1806	599	16802	1.30466	1	0.260148	14.6366
GOTERM_BP_DIRECT	GO:0016180~snRNA processing	6	0.310559	0.00910958	Q1JPD6, E1BJI9, Q32LL5, E1BN70, E1B8S1, A1L552	1501	13	13824	4.2507	1	0.813745	15.5068
GOTERM_BP_DIRECT	GO:0048596~embryonic camera-type eye morphogenesis	6	0.310559	0.00910958	F1N694, E1BLY0, E1BQ34, E1BLZ5, F1N264, Q1LZF1	1501	13	13824	4.2507	1	0.813745	15.5068
UP_SEQ_FEATURE	repeat:WD 1	11	0.569358	0.00917313	Q2HJH6, Q5E966, A5D7H2, Q5BIM8, Q9XSC3, Q3B7M6, A7MB12, P35605, Q9TTK4, Q0VBY8, Q32LP9	351	76	6267	2.58423	0.999992	0.692592	13.9447
UP_SEQ_FEATURE	repeat:WD 2	11	0.569358	0.00917313	Q2HJH6, Q5E966, A5D7H2, Q5BIM8, Q9XSC3, Q3B7M6, A7MB12, P35605, Q9TTK4, Q0VBY8, Q32LP9	351	76	6267	2.58423	0.999992	0.692592	13.9447
SMART	SM00233:PH	44	2.27743	0.0091944	F1MDV3, F1MQ44, F1MNV2, F1MIM9, E1BNT8, F1MH50, Q1KZG5, A7Z032, F1MBT5, E1BJC1, O97902, F1MRW6, F1N657, F1MYE0, F1MJV1, F1MYC9, F1MXJ6, A4IFL7, A6QP95, F1MLJ5, F1MCG9, F1N1Q7, E1BH60, F1MQ30, E1BPM7, E1B7C4, F1N6I9, E1BB77, E1BK14, F1MZA2, P21146, A7MB96, F1MUS9, F1MF11, P10895, F1MGG8, F1MBI8, F1N7C3, F1MZ03, E1BLT3, F1MRH8, P09851, Q28013, F1MSU8	1193	221	8740	1.45858	0.989277	0.18629	12.4251
UP_SEQ_FEATURE	metal ion-binding site:Calcium 2	6	0.310559	0.00930261	Q9GLE5, O77656, P10895, Q0VCY0, P52176, P57709	351	24	6267	4.46368	0.999994	0.662959	14.1278
GOTERM_BP_DIRECT	GO:0035556~intracellular signal transduction	44	2.27743	0.00936051	E1BJG8, E1BMP9, E1BEL4, E1B7V7, F1MNV2, A5D7A1, F1MKW8, E1BNT8, E1B754, Q3MHZ2, F1MY84, F1MBT5, E1B7K6, F1N657, E1BKW7, E1BHX7, E1BIM8, F1MJV1, G5E5G8, E1BG08, A6QP95, E1BH25, F1MP30, Q0V8K7, F1MCG9, F1N1Q7, A7YY57, E1BH60, Q4TVR5, E1BK33, P19754, E1B716, E1BK14, F1MZA2, E1B9S2, E1BM51, P10895, F1MZF7, P10894, E1BIV2, F1MCX4, F1MRH8, Q28013, E1BIL8	1501	276	13824	1.46824	1	0.80697	15.8999
UP_SEQ_FEATURE	compositionally biased region:Ser-rich	9	0.465839	0.00952858	A0JNC2, A6QPB3, Q32LL5, Q6T8E9, A4FV57, A6QLT2, Q3MHH1, Q58CX9, Q32LB3	351	54	6267	2.97578	0.999995	0.639858	14.4464
INTERPRO	IPR000884:Thrombospondin, type 1 repeat	14	0.724638	0.0100808	F1MVP0, E1BCW5, F1N102, Q9TT93, Q9GLX9, F1N2M2, Q5BIR3, E1BKL4, A5PJP9, F1MF39, E1BI72, E1BE11, E1B9M5, F1N303	1806	60	16802	2.1708	1	0.282645	16.222
GOTERM_CC_DIRECT	GO:0042382~paraspeckles	4	0.207039	0.0102253	Q1LZD9, E1BQ37, Q0P5D2, G3N361	1648	5	15461	7.50534	0.999019	0.390312	14.2909
KEGG_PATHWAY	bta03013:RNA transport	24	1.24224	0.0102802	Q5E966, E1BPB3, F1MYS7, F1MFD5, Q1LZ90, E1BG57, E1BEK9, E1BLZ8, F1MPW7, A7Z089, F1N1V3, A5PJZ5, F1MQ83, A5D7B3, E1BIX5, A6QM02, A7MB49, F1MX04, F1MM55, E1BCV4, E1BM06, Q2TBT7, F1MNL6, E1BE98	658	159	7550	1.73195	0.931186	0.105522	12.6273
GOTERM_MF_DIRECT	GO:0001077~transcriptional activator activity, RNA polymerase II core promoter proximal region sequence-specific binding	32	1.65631	0.0103319	E1BC87, E1BNZ8, F1MGR9, E1BA84, E1B9T6, E7E1K7, A7MBB7, F1N4J1, Q08E53, E1BL43, F1MNA3, A6QLQ3, G5E5C7, Q8SQ19, F1MCY1, E1B7S6, E1BD25, A4FV76, G3X6J7, F1MZE3, F1MVT0, Q1LZF1, F1MT98, Q6VFT7, B2CML0, F1MW83, E1BI59, F1MSU2, E1BJP4, E1BI80, Q5E9B6, E1B8C0	1418	187	13095	1.58029	0.999934	0.354425	14.9988
INTERPRO	IPR003151:PIK-related kinase, FAT	4	0.207039	0.0104731	E1BFB4, E1BKJ5, E1BLB6, F1MLY7	1806	5	16802	7.44275	1	0.288454	16.8
KEGG_PATHWAY	bta04911:Insulin secretion	15	0.776398	0.010527	E1BQ12, E1BKR6, P19754, F1MCH1, E1BNX4, Q8WN95, F1MTK5, P27925, A4FUY2, Q2HJF7, Q8SQ19, P10894, E1BHX7, E1B9K3, F1N415	658	82	7550	2.09893	0.93549	0.103841	12.9115
SMART	SM00439:BAH	6	0.310559	0.0105975	F1MM81, E1BNH8, E1BLK1, E1BGA4, F1MGR3, Q24K09	1193	11	8740	3.99604	0.994653	0.20343	14.1897
GOTERM_MF_DIRECT	GO:0071558~histone demethylase activity (H3-K27 specific)	4	0.207039	0.0106862	G3N346, F1MSU6, F1MV76, F1N542	1418	5	13095	7.38787	0.999953	0.351451	15.4736
GOTERM_BP_DIRECT	GO:0035418~protein localization to synapse	4	0.207039	0.0107704	G5E618, E1BMN9, F1MPI1, F1N415	1501	5	13824	7.36789	1	0.836004	18.0766
GOTERM_BP_DIRECT	GO:0045162~clustering of voltage-gated sodium channels	4	0.207039	0.0107704	G3MYY6, E1BLT3, E1BN05, E1BLM2	1501	5	13824	7.36789	1	0.836004	18.0766
GOTERM_BP_DIRECT	GO:0001957~intramembranous ossification	4	0.207039	0.0107704	Q9GLE5, P02453, G3X7P3, F1MG71	1501	5	13824	7.36789	1	0.836004	18.0766
GOTERM_BP_DIRECT	GO:0016337~single organismal cell-cell adhesion	14	0.724638	0.0108918	F1N0Y1, F1MN25, O18977, Q6URK6, E1BPV1, E1BC86, E1B8X1, E1B716, A7YY40, F1MEB7, F1MIY8, F1MBH4, E1BPQ9, Q0VCX4	1501	60	13824	2.14897	1	0.826038	18.2616
GOTERM_BP_DIRECT	GO:0007160~cell-matrix adhesion	14	0.724638	0.0108918	F1MN25, O18977, E1B864, F1MVW3, F1MFD1, E1BJP4, A7YY40, A6QLK4, A5D7A3, F1MJQ6, E1BN52, E1BIG4, Q0VCX4, E1BDD5	1501	60	13824	2.14897	1	0.826038	18.2616
UP_SEQ_FEATURE	compositionally biased region:Gln-rich	6	0.310559	0.0111083	A1YQ93, Q9BE97, A0JNC2, Q08E53, A4IFD2, Q08E31	351	25	6267	4.28513	0.999999	0.667082	16.6431
KEGG_PATHWAY	bta05213:Endometrial cancer	11	0.569358	0.0112365	F1MT98, G3X7P3, A0A024QYS0, A6QPT0, F1N4K5, E1BE66, F1N7C3, Q3MHM6, E1BCV1, E1BNU2, Q0VCX4	658	51	7550	2.47482	0.946427	0.106462	13.7237
GOTERM_BP_DIRECT	GO:0009954~proximal/distal pattern formation	8	0.414079	0.0114679	F1N215, F1MQ55, F1MCY1, E1BAG4, E1BMR6, G3X6U1, A7Z086, Q0VCX4	1501	24	13824	3.06995	1	0.82885	19.1337
KEGG_PATHWAY	bta04370:VEGF signaling pathway	12	0.621118	0.0117247	F1MXZ6, A6QPT0, E1BIM8, F1MWF1, E1BE66, F1MGR9, F1MFD1, E1BCV1, E1BNU2, Q3SYZ2, F1MG30, A4IFJ5	658	59	7550	2.33373	0.952861	0.10697	14.2786
INTERPRO	IPR015940:Ubiquitin-associated/translation elongation factor EF1B, N-terminal, eukaryote	11	0.569358	0.0117913	A6QQS9, E1BMF7, E1B9F9, F1MKW8, F1MXE2, F1N510, E1BIF6, Q58DM2, A6H705, E1BND0, E1BNY9	1806	42	16802	2.43661	1	0.314826	18.7152
GOTERM_MF_DIRECT	GO:0005085~guanyl-nucleotide exchange factor activity	12	0.621118	0.0119163	E1B7E2, Q17QV2, E1BPB3, F1MIX6, E1BMG8, A5D7L2, E1B7C4, A5D794, E1BK77, Q5E9J8, F1MS52, Q58DL5	1418	48	13095	2.30871	0.999985	0.370626	17.1032
INTERPRO	IPR001589:Actinin-type, actin-binding, conserved site	7	0.362319	0.012045	E1BE25, E1BM27, F1MGT1, E1BLT3, F1MRT9, F1MYC9, F1MF78	1806	19	16802	3.42758	1	0.316805	19.079
SMART	SM00327:VWA	17	0.879917	0.0121102	E1BB22, E1B7H2, A5D784, Q08DB4, E1BB91, F1MD40, A6QQ97, E1BC74, F1MHZ1, E1BPV7, G3MXE4, E1BI98, E1BCW8, E1BB39, P56652, F1MNH3, E1BDD5	1193	65	8740	1.91605	0.997477	0.220628	16.055
GOTERM_BP_DIRECT	GO:0001570~vasculogenesis	12	0.621118	0.0121594	Q5W9D7, G5E5C7, E1BBN3, E1BDB1, E1BJ31, A7MB98, F1N616, F1MXE0, E1BK00, P09851, F1MBH4, F1MP12	1501	48	13824	2.30247	1	0.834272	20.1689
GOTERM_MF_DIRECT	GO:0005089~Rho guanyl-nucleotide exchange factor activity	14	0.724638	0.0122268	F1MQ44, F1MNV2, F1MQ30, Q8WN95, E1BK14, F1MZA2, F1MBT5, Q29RM4, F1N657, F1N7C3, E1BIL8, F1MXJ6, F1MSU8, F1N1Q7	1418	61	13095	2.11947	0.999989	0.366289	17.5099
INTERPRO	IPR013767:PAS fold	6	0.310559	0.0124074	Q9BE97, A4IFH3, E1BPY4, E1BLF5, E1B815, F1MVD0	1806	14	16802	3.98719	1	0.321047	19.5959
INTERPRO	IPR001711:Phospholipase C, phosphatidylinositol-specific, Y domain	6	0.310559	0.0124074	E1BH60, F1MF11, P10895, P10894, E1BHX7, E1BNT8	1806	14	16802	3.98719	1	0.321047	19.5959
INTERPRO	IPR001192:Phosphoinositide phospholipase C	6	0.310559	0.0124074	E1BH60, F1MF11, P10895, P10894, E1BHX7, E1BNT8	1806	14	16802	3.98719	1	0.321047	19.5959
GOTERM_BP_DIRECT	GO:0034613~cellular protein localization	9	0.465839	0.0124385	F1MTR3, G3X7P3, E1B9F9, A6QLS6, Q3MHM6, E1BLT3, E1BKA3, E1BFN3, E1BKC4	1501	30	13824	2.76296	1	0.82936	20.5832
GOTERM_MF_DIRECT	GO:0003730~mRNA 3'-UTR binding	10	0.517598	0.0125083	Q1JPD6, G3MX91, A7MB98, F1MV20, Q2TBT7, F1MGJ7, A5D7Q4, E1BE82, E1BMA4, F1MSH0	1418	36	13095	2.56523	0.999991	0.361596	17.8771
KEGG_PATHWAY	bta04020:Calcium signaling pathway	27	1.39752	0.0125134	E1BMP3, F1MN32, A7YY44, E1BE22, F1MR37, F1MR40, E1BDQ4, E1BHX7, Q58CP9, E1BQ12, P19754, G3X778, Q8WN96, Q8WN95, F1MP46, F1MTK5, F1N2X0, F1MXZ6, Q2HJF7, P10895, P10894, Q9TT96, Q0VCY0, F1N7J2, G3X7Z2, F1N1E0, F1MDE0	658	189	7550	1.63917	0.961666	0.109951	15.1679
GOTERM_BP_DIRECT	GO:0030534~adult behavior	7	0.362319	0.0126166	E1BD77, A0A024QYS0, E1B7S6, G5E618, F1MU26, G1K1H0, E1BAU4	1501	19	13824	3.39311	1	0.822227	20.8465
COG_ONTOLOGY	Cell division and chromosome partitioning / Cytoskeleton	8	0.414079	0.0126387	F1MMV0, E1BH40, A6QP00, E1B782, A2VDP7, E1B8U7, F1MDF3, F1MM88	196	23	1671	2.96539	0.39107	0.39107	10.9229
GOTERM_BP_DIRECT	GO:0008283~cell proliferation	26	1.34576	0.0128801	F1MDB9, Q95141, F1MJE0, F1MY84, E1BAK6, F1MTI9, G3X7P3, F1MCY1, Q28147, F1MZU6, F1N1H5, F1N0Y1, E1BMF7, A6QLJ0, E1BJF4, F1MB07, E1BLB6, A7MB98, F1N6H1, E1BMR2, E1BP59, F1MSQ8, E1BPW0, Q27991, P20072, G3MYX8	1501	145	13824	1.65142	1	0.817419	21.2345
GOTERM_BP_DIRECT	GO:0002052~positive regulation of neuroblast proliferation	6	0.310559	0.0129233	F1N215, E1BPQ2, F1MM80, A6QQ94, Q0VCX4, Q1LZF1	1501	14	13824	3.94708	1	0.807464	21.298
INTERPRO	IPR001452:Src homology-3 domain	33	1.70807	0.0130604	F1MB71, F1MJI3, E1BMG8, A2VDZ8, A5D783, F1MLR9, O97902, F1MS60, F1MIX6, F1N657, F1N2S5, F1MW39, G3X7P4, E1BIM8, F1N289, F1MXJ6, E1BFB0, G3MZJ5, E1BK14, F1N3K4, F1MQI3, F1MWG7, F1MG13, E1BA43, G5E618, A4IF79, P09851, E1BIL8, E1BFN3, A7MB57, A5D7U7, E1BIJ3, F1MMQ8	1806	199	16802	1.54278	1	0.331207	20.5196
GOTERM_BP_DIRECT	GO:0007018~microtubule-based movement	13	0.672878	0.0133796	F1N1K6, E1BBY6, Q2KII9, E1BDX8, G3N1E4, F1MK55, E1BLB4, F1MSP8, E1BC41, Q29RT6, E1B9R5, A7MBA1, A7MB48	1501	55	13824	2.17688	1	0.807791	21.9652
KEGG_PATHWAY	bta04725:Cholinergic synapse	18	0.931677	0.0137406	E1BQ12, A6QPT0, P19754, E1BE66, E1BNX4, Q8WN96, Q8WN95, F1MTK5, P27925, Q2HJF7, Q8SQ19, P10894, E1BHX7, E1B9K3, E1BCV1, E1BCP6, G3X7Z2, F1N1E0	658	110	7550	1.87759	0.972222	0.116239	16.5349
INTERPRO	IPR020894:Cadherin conserved site	15	0.776398	0.0138244	Q6URK6, F1MC84, A2VDQ6, F1MKX3, E1BAU4, G3X6Y5, F1MMW5, E1BIA5, F1N446, E1B949, F1MHH5, E1BDF9, E1BJ11, F1N3M3, F1N416	1806	69	16802	2.02249	1	0.343199	21.5877
GOTERM_BP_DIRECT	GO:0043588~skin development	8	0.414079	0.0144692	E1B864, E1BDQ4, A5D7G2, F1N127, E1BC86, F1N2Y2, F1N740, E1B778	1501	25	13824	2.94716	1	0.822164	23.5368
SMART	SM00429:IPT	9	0.465839	0.0147842	P98201, F1N4C5, A7Z034, E1BK86, G3X755, F1MGR9, F1MSU2, A7MBB7, F1MBB0	1193	25	8740	2.63738	0.999333	0.253627	19.2604
INTERPRO	IPR018122:Transcription factor, fork head, conserved site	7	0.362319	0.0156748	Q6VFT7, F1MP14, G3MX55, E1BIV1, F1MZB6, F1MBH4, F1MVT0	1806	20	16802	3.2562	1	0.375554	24.1185
INTERPRO	IPR024079:Metallopeptidase, catalytic domain	16	0.828157	0.0159273	E1BK30, F1N2M2, P52176, F1N7Z6, E1BKS5, F1N303, O77656, Q9GLE5, F1MVP0, Q9TT93, F1MIY8, A5D7M5, O18767, G1K1H0, E1BI72, F1MRA8	1806	77	16802	1.93318	1	0.376497	24.4578
UP_SEQ_FEATURE	compositionally biased region:Poly-Ser	9	0.465839	0.0159584	P55156, P02672, Q2HJF7, Q9BE97, A6QLA6, Q08E02, G1K1H0, Q0III6, Q3ZBP3	351	59	6267	2.7236	1	0.770263	23.0615
INTERPRO	IPR026791:Dedicator of cytokinesis	5	0.258799	0.0163735	E1B7E2, F1MIX6, E1BMG8, E1B7C4, E1BK77	1806	10	16802	4.65172	1	0.380968	25.054
GOTERM_CC_DIRECT	GO:0005844~polysome	8	0.414079	0.0163832	A1A4K6, F1MYS7, Q2TBT7, F1MZT7, E1BE88, A5D7Q4, A0A0K1LCB1, E1BP86	1648	26	15461	2.88667	0.999985	0.523959	21.9526
GOTERM_BP_DIRECT	GO:0035023~regulation of Rho protein signal transduction	15	0.776398	0.0168848	F1MQ44, F1MNV2, F1MQ30, Q8WN95, E1BK14, F1MZA2, F1MBT5, Q29RM4, F1N657, F1N7C3, E1BIL8, F1MXJ6, F1MSU8, F1MDF3, F1N1Q7	1501	70	13824	1.97354	1	0.85838	26.915
GOTERM_BP_DIRECT	GO:2000637~positive regulation of gene silencing by miRNA	5	0.258799	0.0169408	E1BJS7, Q2TBT7, E1BP33, E1BKA3, E1BE82	1501	10	13824	4.60493	1	0.850689	26.9916
GOTERM_BP_DIRECT	GO:0098719~sodium ion import across plasma membrane	5	0.258799	0.0169408	F1N798, E1BBL2, F1N5D7, F1MQF9, G5E545	1501	10	13824	4.60493	1	0.850689	26.9916
INTERPRO	IPR001206:Diacylglycerol kinase, catalytic domain	6	0.310559	0.0169936	F1MXZ6, F1MEF4, E1BGA9, G5E5G8, E1B7K6, F1MCG9	1806	15	16802	3.72137	1	0.38841	25.8751
GOTERM_BP_DIRECT	GO:0006281~DNA repair	21	1.08696	0.0170471	E1BGK8, Q2KJC1, Q2KHY5, A6QQB5, A6QLA6, E1BDI4, E1BJG5, E1BEK9, E1B8J2, E1BKJ5, Q3MHJ7, F1N7G8, E1BLB6, F1MLY7, Q5EAB2, E1B7Q7, F1MBL6, E1BFB4, Q32PI0, A6QR20, E1BN70	1501	112	13824	1.72685	1	0.843932	27.1367
UP_KEYWORDS	Ion transport	55	2.84679	0.0171249	E1BF56, F1MR37, F1N798, A6QP02, A5PJQ2, O18875, E1BLQ0, Q27981, P57709, G5E545, M0QW12, E1BBL2, F1MW86, A6QNW6, Q08E24, F1MTK5, F1MY57, E1BPV8, E1BC13, F1MWI8, F1MMU9, F1N7J2, F1MLI5, A4FV89, G3X7Z2, F1N1E0, E1BDC5, E1BIS4, Q1KZG0, P79100, E1BAI4, F1N4L1, F1MR40, Q17QN9, A5PKG7, Q58CP9, E1BK87, E1BKL6, E1BBH7, P23956, A4FV52, F1MGS2, F1MCH1, Q8WN96, Q8WN95, F1N299, F1MP46, F1MQF9, E1BDR3, Q00194,…	1884	383	17808	1.35737	0.996655	0.434484	20.8777
INTERPRO	IPR013087:Zinc finger C2H2-type/integrase DNA-binding domain	59	3.05383	0.0172202	Q95LI3, E1BPQ2, F1N0E1, F1MWD7, A6QNV5, E1BHU5, F1N790, A0JNC9, F1N264, E1B842, E1BGD3, A6QNZ1, F1MJD3, F1MIV1, F1MFQ4, E1BGQ4, G5E6Q2, E1BN65, B2CML0, E1BJ30, F1MMF1, G3N0N0, E1BCA0, E1BF46, F1MI25, F1ML16, Q29RN3, F1MUJ5, F1MDR1, F1N4Z5, E1BMR6, F1MW46, A6QQG2, E1B9B2, F1N215, A6QPT6, A7Z030, F1MPW8, F1MZB7, F1N281, F1ML21, F1MCY1, A6QR00, E1BD25, A4FV57, F1MUV6, E1BN44, G3N0P3, E1BBV0, F1MXG5,…	1806	410	16802	1.33879	1	0.388693	26.1731
UP_SEQ_FEATURE	propeptide:C-terminal propeptide	3	0.15528	0.01731	P02453, Q32S24, P02459	351	4	6267	13.391	1	0.77464	24.7657
UP_SEQ_FEATURE	domain:Fibrillar collagen NC1	3	0.15528	0.01731	P02453, Q32S24, P02459	351	4	6267	13.391	1	0.77464	24.7657
UP_SEQ_FEATURE	domain:Exonuclease	3	0.15528	0.01731	A6QLH5, Q2YDK1, Q2T9U5	351	4	6267	13.391	1	0.77464	24.7657
UP_SEQ_FEATURE	domain:Ras-GAP	3	0.15528	0.01731	A5D794, P09851, Q28013	351	4	6267	13.391	1	0.77464	24.7657
UP_SEQ_FEATURE	short sequence motif:LXXLL motif	3	0.15528	0.01731	B0JYK8, Q8SQ19, F1N3D4	351	4	6267	13.391	1	0.77464	24.7657
UP_SEQ_FEATURE	metal ion-binding site:Zinc 2; in inhibited form	3	0.15528	0.01731	Q9GLE5, O77656, P52176	351	4	6267	13.391	1	0.77464	24.7657
GOTERM_MF_DIRECT	GO:0004435~phosphatidylinositol phospholipase C activity	6	0.310559	0.0174858	E1BH60, F1MF11, P10895, P10894, E1BHX7, E1BNT8	1418	15	13095	3.69394	1	0.454285	24.1204
GOTERM_MF_DIRECT	GO:0005487~nucleocytoplasmic transporter activity	6	0.310559	0.0174858	F1MM55, E1BCV4, E1BG57, A7Z089, E1BIX5, A5D7B3	1418	15	13095	3.69394	1	0.454285	24.1204
INTERPRO	IPR011009:Protein kinase-like domain	70	3.62319	0.0175991	E1BMP9, E1BJM5, F1MKW8, F1N6H6, F1MDD9, A5PJQ7, Q58DM2, F1N3R6, E1BIM8, E1B847, F1MBL6, A6QQH7, A5PK86, E1BJ31, E1BB52, E1BJH5, E1BK33, A6QLB8, E1BQ34, F1MXE2, F1MG74, E1BEM1, E1B8H0, Q2HJF7, E1B9F9, F1N0U2, Q08DK8, E1BCP6, A7MB57, E1B9M6, G3MYX8, E1BBM3, E1BEL4, A6QPT0, E1BMP3, E1BE66, F1MWK1, E1B754, F1MLY7, F1N3T0, E1BC69, Q5EAB2, F1N3W6, F1MBU9, F1MWF1, A5D7F0, E1BFB4, E1BP01, A5D791, F1MXJ6,…	1806	500	16802	1.30248	1	0.391615	26.6688
GOTERM_BP_DIRECT	GO:0007616~long-term memory	6	0.310559	0.0176845	E1BQ12, P19754, E1BIV2, G5E618, E1BCJ9, A4FV52	1501	15	13824	3.68394	1	0.846256	28.0018
INTERPRO	IPR017970:Homeobox, conserved site	27	1.39752	0.0179372	Q2TEA4, F1N0Z3, E1BNZ8, F1N693, E1BAG4, E1BPC7, F1MPW8, E1B9T6, E1BL43, F1MJX6, A4FV76, E1BG70, E1BGM6, F1N3B5, F1MT17, Q1LZF1, G3N3S1, F1MQ55, E1BLB9, F1MKX5, E1BAD7, E1BD77, E1B855, A6H796, F1MIH1, E1B7H9, Q08DG7	1806	158	16802	1.58983	1	0.393758	27.1083
GOTERM_BP_DIRECT	GO:0008286~insulin receptor signaling pathway	10	0.517598	0.0181058	E1BPQ1, F1MYE0, A6QLB8, F1MGG8, A9CR99, F1MRH8, E1B716, F1MJE0, F1MC90, F1MVT0	1501	38	13824	2.42365	1	0.844984	28.5683
KEGG_PATHWAY	bta04330:Notch signaling pathway	10	0.517598	0.0183304	E1BDN7, G3X812, G3X6N5, F1MFB5, G3X7K5, E1BP59, F1MPE9, F1MD32, F1N778, F1MRA1	658	47	7550	2.44131	0.991701	0.147618	21.4689
GOTERM_BP_DIRECT	GO:0051216~cartilage development	9	0.465839	0.0184022	F1MQT9, F1MVW3, F1MU26, E1BE01, A6QP14, Q8SQG8, Q08DG7, F1N264, A7MBK1	1501	32	13824	2.59027	1	0.841787	28.9643
KEGG_PATHWAY	bta04923:Regulation of lipolysis in adipocytes	11	0.569358	0.0188018	E1BQ12, A6QPT0, F1MYE0, P19754, Q9TT96, F1MGG8, F1N3R5, E1BE66, E1B9K3, E1BCV1, F1MJE0	658	55	7550	2.29483	0.992672	0.146647	21.9602
UP_KEYWORDS	Calcium	59	3.05383	0.018813	Q2KIT5, A2VDQ6, Q08E31, F1MR37, P02453, E1BIA5, Q32S24, E1B949, P02459, P13135, P57709, A4FV93, E1BK30, F1MKX3, E1BE11, Q08E24, F1MTK5, P13213, Q9GLE5, O77656, P10895, P10894, F1MHH5, O18767, F1N7J2, F1N3M3, F1MG30, G3X7Z2, F1N1E0, Q6URK6, P79100, E1B971, Q2KJJ9, E1BAU4, G3X6Y5, P79134, G3X6N5, Q58CP9, F1N416, Q9GLR1, A4IFJ5, Q28107, Q2T9N0, F1MKV7, Q8WN96, F1MC84, Q8WN95, P52176, Q2TBJ9, E1B9K4,…	1884	418	17808	1.33417	0.998103	0.434343	22.7003
GOTERM_CC_DIRECT	GO:0005667~transcription factor complex	27	1.39752	0.0188451	E1BC87, F1N694, Q2TEA4, F1N551, E1BFC1, F1N264, F1MTR3, E1BND5, A4IFH3, E1BLY0, E1BLS1, E1B7S6, A7MBC4, E1BKA3, G3X6J7, Q5EA36, Q0VCX4, F1MQ55, E1BI59, A7YY54, A7Z086, E1BLB6, Q9BE97, A5D7M0, E1BP33, E1BLF5, E1BMR3	1648	160	15461	1.58316	0.999997	0.55131	24.8327
GOTERM_BP_DIRECT	GO:0000226~microtubule cytoskeleton organization	12	0.621118	0.0189826	A6QNZ5, F1MDB9, E1BM39, E1BKZ0, A5D7A1, E1BH84, E1BK00, F1MEW3, E1BNH9, F1MSQ8, G3MZK6, Q58DM2, F1N469	1501	51	13824	2.16703	1	0.843149	29.7337
UP_SEQ_FEATURE	domain:EGF-like	5	0.258799	0.0190049	G1K1H0, Q5E9P5, Q8SQG8, A6QLK4, G3N1F4	351	19	6267	4.69861	1	0.784549	26.8526
INTERPRO	IPR011511:Variant SH3	11	0.569358	0.0190342	F1MB71, F1MJI3, G3X7P4, A2VDZ8, F1MW39, F1MG13, G3MZJ5, G5E618, E1BA43, E1BIL8, E1BIJ3	1806	45	16802	2.27417	1	0.408476	28.5177
GOTERM_MF_DIRECT	GO:0003677~DNA binding	87	4.50311	0.0192046	Q2KJC1, Q95LI3, B0JYK8, F1N790, A7MBB7, F1MNA3, A6QLS0, E1BGA4, A7MB37, A3KN07, Q24K09, P98201, E1BLU4, A4IFH3, F1N463, E1BP22, E1B8D0, Q28147, E1BJA2, F1MCA8, E1BPP7, Q28141, E1BF96, Q3SWY3, A6QLJ0, Q2KHY5, E1BKN0, Q2TBL4, F1MB07, F1N7E7, Q5EA95, F1MBB0, F1N4I0, F1N4M2, Q9BE97, E1BPY8, Q08E27, F1MJM0, A7Z034, A5D786, E1B7X9, F1MXF5, F1MPW8, E7E1K7, F1MKU0, Q3MHJ7, Q3ZBP3, F1ML21, Q08DJ8, E1BPX6,…	1418	640	13095	1.25536	1	0.473757	26.1709
INTERPRO	IPR004755:Cationic amino acid transport permease	4	0.207039	0.0192807	A4IFD5, E1B761, E1BCX7, A0JNF2	1806	6	16802	6.20229	1	0.408836	28.8308
INTERPRO	IPR006576:BRK domain	4	0.207039	0.0192807	F1N734, E1BPM4, E1BDZ3, A5PKK5	1806	6	16802	6.20229	1	0.408836	28.8308
INTERPRO	IPR010506:DMAP1-binding	4	0.207039	0.0192807	F1MLE1, F1MKT7, Q24K09, F1MPW1	1806	6	16802	6.20229	1	0.408836	28.8308
INTERPRO	IPR008936:Rho GTPase activation protein	16	0.828157	0.019882	A7YY57, F1N4C5, F1MJI3, G3X755, A5D794, E1BB77, F1MZM7, F1MBT5, A7MB96, F1MS60, E1BIM3, F1MBI8, F1MM72, P09851, Q28013, E1B801	1806	79	16802	1.88424	1	0.414868	29.5893
INTERPRO	IPR011641:Tyrosine-protein kinase ephrin type A/B receptor-like	7	0.362319	0.0199956	E1BJ31, F1N3R6, A5D7R1, F1MIM6, F1N6H6, P01267, F1MNH3	1806	21	16802	3.10114	1	0.41305	29.7317
GOTERM_BP_DIRECT	GO:0001843~neural tube closure	13	0.672878	0.0201068	F1N0Y1, E1BDM5, G3X755, F1MSA7, Q5EA95, F1MCY2, F1MUW4, E1BJS7, A5D7G2, E1BP59, E1B801, F1MV76, E1B8U8	1501	58	13824	2.06428	1	0.852355	31.2015
GOTERM_BP_DIRECT	GO:0050885~neuromuscular process controlling balance	11	0.569358	0.0202552	G3X7P4, E1B7S6, G5E618, F1MX24, Q0V8B6, E1B755, F1MP46, Q27991, F1MBT5, E1BHN7, F1N1E0	1501	45	13824	2.2513	1	0.847261	31.3931
GOTERM_BP_DIRECT	GO:0006919~activation of cysteine-type endopeptidase activity involved in apoptotic process	11	0.569358	0.0202552	Q3T0G8, A6QQE3, E1B7V7, F1MG84, E1BJA2, G5E5N0, A7YY44, Q5EA95, E1BNU2, E1BPP7, F1MZU6	1501	45	13824	2.2513	1	0.847261	31.3931
UP_SEQ_FEATURE	metal ion-binding site:Calcium 3; via carbonyl oxygen	4	0.207039	0.0203723	Q9GLE5, O77656, P10895, P52176	351	11	6267	6.49262	1	0.787699	28.4966
KEGG_PATHWAY	bta04971:Gastric acid secretion	13	0.672878	0.0205207	E1BQ12, Q2HJF7, E1BMP3, P19754, P10894, E1BHX7, E1BBL2, E1B9K3, Q8WN96, Q8WN95, F1N4L1, F1MLI5, E1BD54	658	72	7550	2.07172	0.995347	0.154492	23.7273
INTERPRO	IPR001680:WD40 repeat	38	1.96687	0.0207408	F1MWB8, F1MF64, A6QP14, P35605, A7MB12, F1MC90, F1MJS7, F1N1C9, F1ML22, E1BCH1, E1BM03, F1MLT6, A5D7H2, Q5BIM8, Q9XSC3, Q3B7M6, E1BLS3, Q0VBY8, Q32LP9, E1BH25, F1MG90, A7MB85, Q5E966, A6QLB5, E1BL55, E1BKF9, Q2HJH6, F1MWY0, F1MUW4, E1BCT7, E1BFN3, F1N3C8, Q9TTK4, E1BJV8, E1BPY6, G3X6I6, F1N406, A6H7I2	1806	245	16802	1.44298	1	0.421084	30.6593
KEGG_PATHWAY	bta04390:Hippo signaling pathway	22	1.13872	0.0208249	F1N0Y1, F1MKS4, E1BEN9, Q3MHM6, G3N2W8, F1N3I6, F1N2V0, F6QT88, F1MZ23, G3X7P3, E1B9F9, F1MWG7, F1MCY1, A6QLS6, E1BP33, F6RHP0, E1BKA3, G3X6J7, Q0VCX4, P55106, A6H7I2, E1BLF1	658	151	7550	1.67173	0.995706	0.15225	24.0362
GOTERM_BP_DIRECT	GO:0048589~developmental growth	7	0.362319	0.0209069	F1N215, F1MCY1, F1MM80, E1BJP4, Q0V8E7, E1BKC4, F1MP12	1501	21	13824	3.06995	1	0.849352	32.2286
GOTERM_BP_DIRECT	GO:0035264~multicellular organism growth	15	0.776398	0.0213055	A6QLJ0, F1MXE0, E1BAT5, E1BL90, F1N704, A7MB98, F1N786, A8KC65, F1N7C3, E1BP22, E1BP59, E1BFB4, E1BHK2, F1MV76, E1BMY0	1501	72	13824	1.91872	1	0.847921	32.7349
UP_KEYWORDS	Basement membrane	5	0.258799	0.0223538	F1N7Q7, A6H737, A6QPB3, F1MZU6, P13213	1884	11	17808	4.29647	0.999425	0.462971	26.3975
KEGG_PATHWAY	bta04360:Axon guidance	19	0.983437	0.0225226	E1BIT8, E1BJ31, E1BE71, F1MJI3, E1BDM5, E1BG65, G3X755, F1MGR9, F1MSU2, E1BNY3, A5PJP9, F1MZA2, F1N3R6, E1BBI3, E1BF41, P09851, E1BMX5, F1MLJ7, A6QLV9	658	125	7550	1.74407	0.997261	0.159309	25.7388
GOTERM_MF_DIRECT	GO:0005543~phospholipid binding	11	0.569358	0.0230322	F1MUS9, F1MWY0, Q3T0G8, F1MTM9, A5D783, E1BLT3, E1BNR0, F1MYC9, F1N3I4, F1MG90, F1N1Q7	1418	46	13095	2.20833	1	0.525192	30.5526
INTERPRO	IPR003439:ABC transporter-like	12	0.621118	0.0233322	F6RLQ6, G5E593, A7Z044, E1BKR6, E1BCG1, F1MIP7, A4FUE2, G3MWN6, G3MW11, E1BK38, G5E556, F1N3Y6	1806	53	16802	2.10644	1	0.455989	33.796
GOTERM_BP_DIRECT	GO:0003007~heart morphogenesis	6	0.310559	0.0234741	E1B949, P02459, E1BFB4, G3X6U1, F1MV76, F1MP12	1501	16	13824	3.4537	1	0.868538	35.4269
INTERPRO	IPR000331:Rap GTPase activating proteins domain	5	0.258799	0.0235766	A6QPH2, E1BP38, F1MCG4, E1BHF6, E1BNT2	1806	11	16802	4.22883	1	0.455782	34.0848
INTERPRO	IPR010703:Dedicator of cytokinesis C-terminal	5	0.258799	0.0235766	E1B7E2, F1MIX6, E1BMG8, E1B7C4, E1BK77	1806	11	16802	4.22883	1	0.455782	34.0848
INTERPRO	IPR027357:DHR-2 domain	5	0.258799	0.0235766	E1B7E2, F1MIX6, E1BMG8, E1B7C4, E1BK77	1806	11	16802	4.22883	1	0.455782	34.0848
INTERPRO	IPR027007:DHR-1 domain	5	0.258799	0.0235766	E1B7E2, F1MIX6, E1BMG8, E1B7C4, E1BK77	1806	11	16802	4.22883	1	0.455782	34.0848
INTERPRO	IPR001936:Ras GTPase-activating protein	5	0.258799	0.0235766	F1MBI8, A5D794, P09851, E1BB77, Q28013	1806	11	16802	4.22883	1	0.455782	34.0848
KEGG_PATHWAY	bta05030:Cocaine addiction	10	0.517598	0.0236752	A7Z034, Q8SQ19, F1MWI8, E1BK87, E1BNX4, A6QLQ3, F1MP46, P27925, A4FUY2, F1MR40	658	49	7550	2.34167	0.997982	0.162475	26.8746
UP_SEQ_FEATURE	topological domain:Cytoplasmic	56	2.89855	0.0237047	Q95141, E1BF56, A7MBJ4, A6QLE6, Q29RN8, Q0V8E7, A6QLK4, A5PJQ2, Q29S03, Q8SQ19, A6QPB3, O18875, P49259, Q27981, P11024, P57709, Q3SX17, P19754, A6QNW6, F1MR22, A6QLF8, Q5E9Y2, G3N1F4, Q3ZC80, Q3ZCD0, Q5E9E4, Q5E9E8, Q3T904, Q6URK6, Q58DK1, Q1KZG0, P79100, A7YY44, P34974, Q29397, Q58CP9, P23956, Q3SZL5, P58353, A4FV52, A1A4J6, P85521, Q5BIR3, Q8WN96, Q8WN95, G5E6I3, Q0IIL2, Q00194, G3N2T6, Q6R4Q5,…	351	760	6267	1.31561	1	0.818403	32.3589
GOTERM_MF_DIRECT	GO:0015385~sodium:proton antiporter activity	5	0.258799	0.0241458	F1N798, E1BBL2, F1N5D7, F1MQF9, G5E545	1418	11	13095	4.19765	1	0.530112	31.781
GOTERM_MF_DIRECT	GO:0015386~potassium:proton antiporter activity	5	0.258799	0.0241458	F1N798, E1BBL2, F1N5D7, F1MQF9, G5E545	1418	11	13095	4.19765	1	0.530112	31.781
UP_KEYWORDS	Actin-binding	23	1.19048	0.0243002	F1MGT1, Q3MHN5, F1MLR9, F1MF78, Q865V6, G3MWR8, F1MK25, F1MCY2, E1BE25, E1BPX8, E1BM27, E1BKW7, F1MCA3, Q3SYU6, E1BLT3, F1MRT9, F1MYC9, E1BP01, F1MU39, Q27991, Q32LP9, Q0VBZ9, F1MMQ6	1884	134	17808	1.6224	0.999702	0.464454	28.3594
GOTERM_BP_DIRECT	GO:1903352~L-ornithine transmembrane transport	5	0.258799	0.0243725	A4IFD5, F1MLQ4, E1B761, E1BCX7, A0JNF2	1501	11	13824	4.1863	1	0.872515	36.512
INTERPRO	IPR001715:Calponin homology domain	14	0.724638	0.0245313	F1MGT1, A4IFA0, E1BL45, F1MF78, G3MWR8, E1BE25, E1BM27, F1MHF3, Q3SYU6, E1BLT3, F1MRT9, F1MM80, E1BPZ9, F1MYC9	1806	67	16802	1.944	1	0.465482	35.2017
INTERPRO	IPR001660:Sterile alpha motif domain	16	0.828157	0.0245398	E1BJ31, F1MB71, E1BEZ3, F1N6H6, E1BKK6, F6R8E7, F1N3R6, G3X7P4, E1BHH0, E1BKW5, Q58CP9, G5E618, E1B8R5, G3X6J7, E1BMY0, E1BIJ3	1806	81	16802	1.83772	1	0.461946	35.2115
INTERPRO	IPR002126:Cadherin	15	0.776398	0.0246479	Q6URK6, F1MC84, A2VDQ6, F1MKX3, E1BAU4, G3X6Y5, F1MMW5, E1BIA5, F1N446, E1B949, F1MHH5, E1BDF9, E1BJ11, F1N3M3, F1N416	1806	74	16802	1.88583	1	0.459829	35.3369
INTERPRO	IPR002165:Plexin	7	0.362319	0.0250587	F1N4C5, E1BDM5, E1BG65, G3X755, E1BNY3, E1BF41, A6QLV9	1806	22	16802	2.96018	1	0.461842	35.811
INTERPRO	IPR001331:Guanine-nucleotide dissociation stimulator, CDC24, conserved site	7	0.362319	0.0250587	F1N657, F1MNV2, E1BIL8, E1BK14, F1MZA2, F1MBT5, F1N1Q7	1806	22	16802	2.96018	1	0.461842	35.811
INTERPRO	IPR027417:P-loop containing nucleoside triphosphate hydrolase	107	5.5383	0.0251705	F1MY41, Q2YDD2, E1B7V9, A3KN07, E1BC41, E1B9R5, Q2NKY8, F1MNE5, A6QP02, F1MEM4, A5D7D4, F1N3B9, G3MWN6, E1B801, Q08DH8, Q1RMS2, Q9TTA5, F1MDN8, E1BPM4, P49410, E1BED7, A7MB49, A6QQY0, F1MIP7, E1BK76, Q27991, G5E556, F1MMQ6, G3X7J5, E1B7X9, A5PJV4, E1BKW7, F1N5R7, F1MSG8, E1BP01, F1MU39, F1MSP8, E1BLB1, A0JND4, F1N6C1, F1N085, G3N3W5, G8JKX7, E1BLB4, E1B933, F1MHF3, E1BCG1, F1MG13, F1MFP1, F1MM80,…	1806	821	16802	1.21251	1	0.459818	35.9394
GOTERM_BP_DIRECT	GO:0006378~mRNA polyadenylation	7	0.362319	0.0261775	Q1JPD6, F1MU45, E1BJF6, Q10569, Q2HJD4, Q0P5D2, G1K177, F1MXR8	1501	22	13824	2.93041	1	0.885265	38.6401
KEGG_PATHWAY	bta05200:Pathways in cancer	47	2.43271	0.0268853	E1BPQ1, E1BEN9, F1N215, A7Z034, A6QPT0, E1BE66, A7YY44, A7MBB7, F1MBT5, E1B778, G3X7P3, A5D977, F1N0T1, F1MCY1, E1BHX7, F1N510, E1BFB4, E1BPP7, F1MZU6, Q0VCX4, E1BQ12, P19754, Q3MHM6, E1BNU2, F1MYX9, Q645M6, G3N2W8, P52176, F1MZA2, Q9XS49, E1BGY3, Q3ZC80, F1N7Q7, A6QQE3, Q9GLE5, Q9BE97, A0A024QYS0, F1MD77, P10894, A5D7G2, F1N7C3, F1MJY9, E1B9K3, E1BCV1, A6QNU4, F1MD32, E1B8X8	658	398	7550	1.35499	0.99914	0.178048	29.9539
GOTERM_MF_DIRECT	GO:0003700~transcription factor activity, sequence-specific DNA binding	64	3.31263	0.0269121	Q95LI3, F1MWD7, A6QNV5, A7MBB7, F1MGR3, P98201, E1B842, Q8SQ19, A4IFH3, A5D7H2, E1BE01, F1MJD3, E1BPP7, E1BGM6, E1BN24, A5PJW1, E1BCA0, F1MBB0, F1N4M2, E1BFW7, F1ML16, Q9BE97, Q29RN3, F1MDR1, Q08DG7, A6QQG2, E1B8T3, F1N215, A7Z034, E1BFC2, G3N054, E1BFC1, A4FUA9, E1BJG5, E1BNX4, A6QQ94, E1BK81, A4FUY2, F1N281, E1BIZ7, F1ML21, F1MTR3, Q08DJ8, F1MTI9, E1BLS1, F1MJX6, E1BFK8, F1MBJ6, G3X6J7, Q0VCX4,…	1418	458	13095	1.29046	1	0.557709	34.7448
UP_KEYWORDS	Laminin EGF-like domain	6	0.310559	0.0274852	F1MD77, F1MHH5, E1BJ11, F1MYX9, F1MER7, E1BPS6	1884	17	17808	3.33608	0.999899	0.481563	31.4658
UP_SEQ_FEATURE	compositionally biased region:Poly-Gly	7	0.362319	0.0277773	A0JNC2, Q4TVR5, A5D7H2, E1B716, Q0III6, P13135, Q0V8K7	351	42	6267	2.97578	1	0.850101	36.8134
UP_SEQ_FEATURE	metal ion-binding site:Zinc 2; catalytic	3	0.15528	0.0277917	Q9GLE5, O77656, P52176	351	5	6267	10.7128	1	0.835337	36.8287
UP_SEQ_FEATURE	domain:DRBM 1	3	0.15528	0.0277917	Q08E27, Q28141, A6QR44	351	5	6267	10.7128	1	0.835337	36.8287
UP_SEQ_FEATURE	domain:DRBM 2	3	0.15528	0.0277917	Q08E27, Q28141, A6QR44	351	5	6267	10.7128	1	0.835337	36.8287
SMART	SM00408:IGc2	36	1.86335	0.0279937	E1BJQ3, F1N3H2, A7MBJ4, E1BC44, F1MDD9, E1BAU3, F1MX14, G3MYY6, F1N2J5, E1BCW5, F1MWF1, E1BKL4, F1MNG8, F1MGX7, E1BNH9, F1MXJ6, E1BE71, E1BPK8, E1BGL8, F1N4K6, A6QP89, G3MZU6, A5PJP9, F1MM03, F1MJR2, E1BLM2, E1BE11, F1MPI1, G3N2T6, E1B9K4, F1MBT2, E1BBI3, E1BL94, F1N7L3, F1MER7, F1MWK8	1193	186	8740	1.41795	0.999999	0.415028	33.4906
UP_KEYWORDS	Nucleotidyltransferase	10	0.517598	0.0289692	Q1JPD6, E1BIX2, E1BPX6, G3MZY8, F1N787, E1BPY8, E1BJF4, E1BCZ0, Q32L81, A6QLS0	1884	42	17808	2.25053	0.999939	0.476247	32.87
INTERPRO	IPR016064:ATP-NAD kinase-like domain	6	0.310559	0.029223	F1MXZ6, F1MEF4, E1BGA9, G5E5G8, E1B7K6, F1MCG9	1806	17	16802	3.28356	1	0.507876	40.4358
INTERPRO	IPR000909:Phospholipase C, phosphatidylinositol-specific , X domain	6	0.310559	0.029223	E1BH60, F1MF11, P10895, P10894, E1BHX7, E1BNT8	1806	17	16802	3.28356	1	0.507876	40.4358
GOTERM_MF_DIRECT	GO:0016887~ATPase activity	19	0.983437	0.0296024	F1N724, E1BAN8, E1BBY6, E1BK38, F1MK55, E1BLB4, E1BC41, E1B9R5, G3N1C8, F1N5R7, A7MBC4, F1MSG8, A4FUE2, E1BDX8, G3MWN6, A5PKK5, F1MSP8, Q29RT6, A7MBA1	1418	104	13095	1.68713	1	0.581255	37.5113
GOTERM_CC_DIRECT	GO:0005719~nuclear euchromatin	7	0.362319	0.029784	G3MZY8, E1BJG5, F1MP49, F1MSA7, P27925, E1BEP4, Q0VCX4	1648	23	15461	2.85529	1	0.698442	36.4711
GOTERM_MF_DIRECT	GO:0042800~histone methyltransferase activity (H3-K4 specific)	6	0.310559	0.0300328	E1BKN0, F1MFD2, E1BLX2, F1N6Y5, E1BGA4, E1BEP4	1418	17	13095	3.25935	1	0.575386	37.9435
GOTERM_BP_DIRECT	GO:0007205~protein kinase C-activating G-protein coupled receptor signaling pathway	6	0.310559	0.0303579	E1BGA9, G5E5G8, A7YY44, E1B7K6, F1MDE0, F1MCG9	1501	17	13824	3.25054	1	0.914699	43.313
GOTERM_BP_DIRECT	GO:0001654~eye development	6	0.310559	0.0303579	F1MKS4, F1MB52, F1MW39, Q2YDD2, E1BHF6, F1MNA3	1501	17	13824	3.25054	1	0.914699	43.313
GOTERM_BP_DIRECT	GO:0031290~retinal ganglion cell axon guidance	6	0.310559	0.0303579	F1N3R6, A6H796, E1BLM2, E1BMX5, E1BPU9, F1MLJ7	1501	17	13824	3.25054	1	0.914699	43.313
GOTERM_BP_DIRECT	GO:0002053~positive regulation of mesenchymal cell proliferation	6	0.310559	0.0303579	E1BLB9, F1MBH4, A6QP14, F1MJE0, A4IFD2, Q0VCX4	1501	17	13824	3.25054	1	0.914699	43.313
INTERPRO	IPR003347:JmjC domain	8	0.414079	0.0305861	E1BFC2, G3N346, A5PK74, F1MSU6, F1MV76, E1BLZ5, F1N542, F1MQ59	1806	29	16802	2.56646	1	0.520474	41.88
GOTERM_BP_DIRECT	GO:0016525~negative regulation of angiogenesis	11	0.569358	0.0308794	F1N7Q7, A6QQE3, E1BJ31, A7MB80, E1BB77, E1BPP7, E1B9M5, F1MZU6, E1BNJ1, E1BPU9, P13213	1501	48	13824	2.11059	1	0.913813	43.8717
KEGG_PATHWAY	bta04015:Rap1 signaling pathway	28	1.44928	0.0310429	A6QPT0, E1BMG8, E1B7V9, E1BE66, E1BHF6, A7YY44, F1MDD9, A5D977, E1BHX7, F1MWF1, E1BIM8, F6RHP0, F1MDH3, Q0VCX4, E1BQ12, A6QPH2, E1BJ31, P19754, E1BGY3, Q9XS49, E1BM96, Q3ZC80, F1MZ23, P10894, E1BIV2, E1B9K3, E1BCV1, F1MQI1	658	214	7550	1.50129	0.999716	0.198079	33.7641
INTERPRO	IPR023362:PH-BEACH domain	4	0.207039	0.0310746	F1MWY0, F1MF64, Q9TTK4, F1MG90	1806	7	16802	5.31625	1	0.522535	42.3896
INTERPRO	IPR000409:BEACH domain	4	0.207039	0.0310746	F1MWY0, F1MF64, Q9TTK4, F1MG90	1806	7	16802	5.31625	1	0.522535	42.3896
INTERPRO	IPR013315:Spectrin alpha chain, SH3 domain	4	0.207039	0.0310746	F1MWG7, A4IF79, E1BFB0, F1MMQ8	1806	7	16802	5.31625	1	0.522535	42.3896
INTERPRO	IPR000800:Notch domain	4	0.207039	0.0310746	G3X812, F1MPE9, F1N7Z6, E1BF00	1806	7	16802	5.31625	1	0.522535	42.3896
GOTERM_BP_DIRECT	GO:0007156~homophilic cell adhesion via plasma membrane adhesion molecules	18	0.931677	0.0311096	Q6URK6, F1N4K6, F1MC84, A2VDQ6, F1MKX3, E1BPU9, E1BAU4, G3X6Y5, F1MMW5, E1BIA5, F1N446, F1MNG8, F1MHH5, E1B949, E1BDF9, E1BJ11, F1N3M3, F1N416	1501	97	13824	1.70905	1	0.910932	44.1168
UP_KEYWORDS	Anion exchange	3	0.15528	0.0311652	A6QNW6, Q58DD2, E1BDR3	1884	3	17808	9.45223	0.999971	0.479524	34.8992
GOTERM_CC_DIRECT	GO:0032039~integrator complex	5	0.258799	0.0315306	E1BJI9, Q32LL5, E1BN70, E1B8S1, A1L552	1648	12	15461	3.90903	1	0.698703	38.1656
GOTERM_MF_DIRECT	GO:0004972~NMDA glutamate receptor activity	4	0.207039	0.03167	F1MWI8, E1BK87, F1MP46, F1MR40	1418	7	13095	5.27705	1	0.584155	39.5623
GOTERM_MF_DIRECT	GO:0046966~thyroid hormone receptor binding	4	0.207039	0.03167	E1B7Q7, F1MGM4, E1B7Q6, A4IFA0	1418	7	13095	5.27705	1	0.584155	39.5623
GOTERM_MF_DIRECT	GO:0016922~ligand-dependent nuclear receptor binding	4	0.207039	0.03167	F1MGM4, G3X7K5, E1BPY4, F1MVD0	1418	7	13095	5.27705	1	0.584155	39.5623
INTERPRO	IPR016201:Plexin-like fold	10	0.517598	0.0316891	F1N4C5, E1B864, E1BDM5, E1BG65, G3X755, F1MVW3, E1BNY3, E1BF41, E1BPS6, A6QLV9	1806	42	16802	2.2151	1	0.525978	43.0245
INTERPRO	IPR020839:Stromalin conservative domain	3	0.15528	0.0321291	G3X6R3, F1MC39, E1B9B0	1806	3	16802	9.30343	1	0.527382	43.4751
INTERPRO	IPR024843:Dapper	3	0.15528	0.0321291	E1BG86, F1N127, F1MP88	1806	3	16802	9.30343	1	0.527382	43.4751
INTERPRO	IPR012975:NOPS	3	0.15528	0.0321291	Q1LZD9, E1BQ37, G3N361	1806	3	16802	9.30343	1	0.527382	43.4751
INTERPRO	IPR009738:BAT2, N-terminal	3	0.15528	0.0321291	E1BAF6, G3X6B2, E1BGB2	1806	3	16802	9.30343	1	0.527382	43.4751
INTERPRO	IPR015819:Lipid transport protein, beta-sheet shell	3	0.15528	0.0321291	P55156, E1BNR0, M5FMV8	1806	3	16802	9.30343	1	0.527382	43.4751
INTERPRO	IPR021097:CPH domain	3	0.15528	0.0321291	E1BM39, E1BK00, E1B782	1806	3	16802	9.30343	1	0.527382	43.4751
INTERPRO	IPR001747:Lipid transport protein, N-terminal	3	0.15528	0.0321291	P55156, E1BNR0, M5FMV8	1806	3	16802	9.30343	1	0.527382	43.4751
INTERPRO	IPR013721:STAG	3	0.15528	0.0321291	G3X6R3, F1MC39, E1B9B0	1806	3	16802	9.30343	1	0.527382	43.4751
INTERPRO	IPR015816:Vitellinogen, beta-sheet N-terminal	3	0.15528	0.0321291	P55156, E1BNR0, M5FMV8	1806	3	16802	9.30343	1	0.527382	43.4751
INTERPRO	IPR011030:Vitellinogen, superhelical	3	0.15528	0.0321291	P55156, E1BNR0, M5FMV8	1806	3	16802	9.30343	1	0.527382	43.4751
INTERPRO	IPR007071:A-kinase anchoring protein 95 (AKAP95)	3	0.15528	0.0321291	F1MMW4, F1MJM0, A7MB37	1806	3	16802	9.30343	1	0.527382	43.4751
SMART	SM00382:AAA	27	1.39752	0.0321571	F6RLQ6, G3X7J5, Q3SX23, E1B8F6, E1B9R5, F1MNE5, F1N5R7, A4FUE2, F1N3B9, G3MWN6, F1MSP8, F1N3Y6, F1N724, G5E593, A7Z044, E1BKR6, G3N3W5, G3MW11, F1MK55, E1BK38, F1MHF3, E1BCG1, F1MFP1, Q59HJ6, F1MIP7, E1BDX8, G5E556	1193	132	8740	1.49851	1	0.448102	37.4674
GOTERM_BP_DIRECT	GO:0001958~endochondral ossification	7	0.362319	0.0322599	O77656, P02453, F1MKS4, A7MB61, P02459, A7YY40, A7MBK1	1501	23	13824	2.803	1	0.914397	45.3258
GOTERM_CC_DIRECT	GO:0016605~PML body	13	0.672878	0.032261	E1BBP0, E1BC69, A6QQE3, Q08DJ8, B0JYK8, Q5EAB2, E1BQ34, E1BLT3, E1BA84, A7MB41, E1BFB4, A0JN73, F1MLY7	1648	63	15461	1.9359	1	0.687542	38.8617
PIR_SUPERFAMILY	PIRSF000636:tyrosine-protein kinase, Jak/Tyk2 type	3	0.15528	0.0322853	E1BEL4, F1MCX4, E1BCP6	119	4	1521	9.58613	0.970149	0.970149	30.8502
SMART	SM00149:PLCYc	6	0.310559	0.0323524	E1BH60, F1MF11, P10895, P10894, E1BHX7, E1BNT8	1193	14	8740	3.13974	1	0.438253	37.6485
GOTERM_MF_DIRECT	GO:0003676~nucleic acid binding	67	3.46791	0.0324404	A0JNC2, Q95LI3, F1MFU7, F1N0E1, F1MWD7, A6QNV5, E1B8K2, E1BHU5, G3N2D0, E1BFX6, A6QNZ1, F1MJD3, F1MIV1, F1MRB9, E1BGQ4, G1K177, Q5EA36, G5E6Q2, F1MMF1, G3N0N0, E1BF46, F1MFZ9, F1N6W2, A7MB49, Q29RN3, G3MX91, Q10569, F1MUJ5, F1N4Z5, E1BMR6, A6QQP0, F1MFR1, A6QQG2, E1B9B2, F1MIB3, F1N734, A7YW33, E1BB24, F1MYK6, A7Z030, F1MZB7, E1BML0, G3N361, F1N281, A4IF81, A6QLH5, A4IFA3, F1MEB7, F1MUV6, E1BM00,…	1418	488	13095	1.2679	1	0.582493	40.3104
UP_SEQ_FEATURE	zinc finger region:C2H2-type 13	4	0.207039	0.0325074	Q95LI3, A6QR00, Q29RK0, Q0VCC5	351	13	6267	5.49375	1	0.866589	41.6411
GOTERM_MF_DIRECT	GO:0070097~delta-catenin binding	3	0.15528	0.0325763	E1BG86, F1N127, F1MP88	1418	3	13095	9.23484	1	0.573783	40.4414
GOTERM_BP_DIRECT	GO:0021775~smoothened signaling pathway involved in ventral spinal cord interneuron specification	3	0.15528	0.0327498	F1N215, F1MCY1, A5D7G2	1501	3	13824	9.20986	1	0.913367	45.8331
GOTERM_BP_DIRECT	GO:0031581~hemidesmosome assembly	3	0.15528	0.0327498	F1MD77, E1B864, A6QPB3	1501	3	13824	9.20986	1	0.913367	45.8331
GOTERM_BP_DIRECT	GO:0021776~smoothened signaling pathway involved in spinal cord motor neuron cell fate specification	3	0.15528	0.0327498	F1N215, F1MCY1, A5D7G2	1501	3	13824	9.20986	1	0.913367	45.8331
GOTERM_BP_DIRECT	GO:0042133~neurotransmitter metabolic process	3	0.15528	0.0327498	F1MKS6, F1MX24, F1N1E0	1501	3	13824	9.20986	1	0.913367	45.8331
GOTERM_BP_DIRECT	GO:0048170~positive regulation of long-term neuronal synaptic plasticity	3	0.15528	0.0327498	F1N3R6, G3X7P4, F1MSJ5	1501	3	13824	9.20986	1	0.913367	45.8331
INTERPRO	IPR019749:Band 4.1 domain	11	0.569358	0.0331609	E1BEL4, F1N2X3, A6QLS6, F1MCX4, F1MH50, A6QPQ3, F1MDH3, G3MZZ8, E1BCP6, F1MLR9, F1MQI1	1806	49	16802	2.08853	1	0.535263	44.5186
INTERPRO	IPR019748:FERM central domain	11	0.569358	0.0331609	F1N2X3, A6QLS6, F1MG13, F1MCX4, F1MH50, A6QPQ3, F1MDH3, G3MZZ8, E1BCP6, F1MLR9, F1MQI1	1806	49	16802	2.08853	1	0.535263	44.5186
GOTERM_MF_DIRECT	GO:0000064~L-ornithine transmembrane transporter activity	5	0.258799	0.0331813	A4IFD5, F1MLQ4, E1B761, E1BCX7, A0JNF2	1418	12	13095	3.84785	1	0.570628	41.0216
GOTERM_MF_DIRECT	GO:0015181~arginine transmembrane transporter activity	5	0.258799	0.0331813	A4IFD5, F1MLQ4, E1B761, E1BCX7, A0JNF2	1418	12	13095	3.84785	1	0.570628	41.0216
GOTERM_MF_DIRECT	GO:0015189~L-lysine transmembrane transporter activity	5	0.258799	0.0331813	A4IFD5, F1MLQ4, E1B761, E1BCX7, A0JNF2	1418	12	13095	3.84785	1	0.570628	41.0216
GOTERM_BP_DIRECT	GO:0001894~tissue homeostasis	5	0.258799	0.0334844	F1MN25, Q32S24, Q9TTS3, P02459, E1BAT5	1501	12	13824	3.83744	1	0.91395	46.5856
GOTERM_BP_DIRECT	GO:0033365~protein localization to organelle	5	0.258799	0.0334844	E1BPP3, F1ML98, E1BBS9, Q865S1, Q1LZF1	1501	12	13824	3.83744	1	0.91395	46.5856
GOTERM_BP_DIRECT	GO:0007076~mitotic chromosome condensation	5	0.258799	0.0334844	F1MMW4, F1MY41, F1MPS0, F1N3G4, A7MB37	1501	12	13824	3.83744	1	0.91395	46.5856
INTERPRO	IPR015919:Cadherin-like	15	0.776398	0.0336118	Q6URK6, F1MC84, A2VDQ6, F1MKX3, E1BAU4, G3X6Y5, F1MMW5, E1BIA5, F1N446, E1B949, F1MHH5, E1BDF9, E1BJ11, F1N3M3, F1N416	1806	77	16802	1.81236	1	0.536647	44.9689
KEGG_PATHWAY	bta05215:Prostate cancer	14	0.724638	0.0340142	E1BPQ1, A7Z034, A6QPT0, E1BE66, E1BNX4, E1BNU2, P27925, Q8SQ19, A0A024QYS0, F1N7C3, E1BCV1, F1MD32, E1BFB4, Q0VCX4	658	86	7550	1.86789	0.999872	0.210115	36.3689
KEGG_PATHWAY	bta04922:Glucagon signaling pathway	15	0.776398	0.0345698	E1BPQ1, B0JYK8, Q58DK1, F1MKW8, G3X778, E1BNX4, Q8WN96, Q8WN95, P27925, Q2HJF7, Q8SQ19, P10894, E1BHX7, Q9TTS3, F1MD32	658	95	7550	1.81171	0.99989	0.208354	36.8453
GOTERM_MF_DIRECT	GO:0005044~scavenger receptor activity	11	0.569358	0.0345725	A5PJQ2, A6H737, F1MYW1, F1N7K7, P85521, F1MNS5, H9BDV2, F1MLU5, Q8MJ24, E1BNJ1, E1B9M8	1418	49	13095	2.07313	1	0.576123	42.3356
GOTERM_CC_DIRECT	GO:0036064~ciliary basal body	14	0.724638	0.0355338	E1BK86, F1MB52, F1MHS0, Q3B7M6, F1MU26, Q9BDH1, E1BC93, Q5EA95, E1BG09, E1BFN3, F1MDL2, Q58DM2, E1BP05, E1BKI6	1648	71	15461	1.84991	1	0.704557	41.8915
GOTERM_BP_DIRECT	GO:0009566~fertilization	9	0.465839	0.0359678	F1MV84, A0JNI2, E1B8X1, E1BLT3, E1BNR0, F1MGY6, A5D7Q4, F1MNA1, E1BIE5	1501	36	13824	2.30247	1	0.924784	49.0569
SMART	SM01137:SM01137	4	0.207039	0.0367477	F1MLE1, F1MKT7, Q24K09, F1MPW1	1193	6	8740	4.88405	1	0.46948	41.5953
SMART	SM00592:BRK	4	0.207039	0.0367477	F1N734, E1BPM4, E1BDZ3, A5PKK5	1193	6	8740	4.88405	1	0.46948	41.5953
INTERPRO	IPR000082:SEA domain	6	0.310559	0.0369821	F2FB38, E1BBU2, F1MN54, F1MSI2, F1MER7, F1MWW8	1806	18	16802	3.10114	1	0.568135	48.2271
INTERPRO	IPR001357:BRCT domain	7	0.362319	0.0375819	E1BHH1, F1N787, F1MAV4, F1MB07, Q0VCT3, E1BI26, A6QR20	1806	24	16802	2.7135	1	0.570579	48.7875
UP_SEQ_FEATURE	short sequence motif:Nuclear localization signal	10	0.517598	0.038245	Q5W9D7, P98201, A6QLJ0, Q863B3, A7MB80, Q10569, Q6T8E9, Q28141, Q865V6, Q24K09	351	82	6267	2.1774	1	0.896567	47.0325
GOTERM_BP_DIRECT	GO:0032870~cellular response to hormone stimulus	7	0.362319	0.0391905	F1N1Y7, F1MKW8, P48044, E1BPY4, F1MVD0, A7YY54, F1MLJ7	1501	24	13824	2.68621	1	0.937378	52.103
GOTERM_CC_DIRECT	GO:0016324~apical plasma membrane	26	1.34576	0.0392861	E1BDN7, E1BJQ3, Q1KZG0, F1MWK1, Q8SQG8, P48733, F1MLN5, E1BK86, A6QP02, G3MXY5, F1MMT3, E1BP05, P58353, F1MGS2, Q4TVR5, F1MKV7, A7YY70, F1MS08, A5PJL8, A0A024QYS0, F1N6H1, E1BCG1, F1MIP7, F1MGK8, E1B955, F1N5Z0	1648	163	15461	1.49646	1	0.723717	45.1927
INTERPRO	IPR001609:Myosin head, motor domain	9	0.465839	0.0396525	E1BPX8, F1MCA3, E1BKW7, F1MG13, E1BP01, F1MU39, F1MLR9, Q27991, F1MMQ6	1806	37	16802	2.263	1	0.587014	50.6786
INTERPRO	IPR018490:Cyclic nucleotide-binding-like	9	0.465839	0.0396525	E1BIS4, F1MW86, F1MZC9, E1BF56, F1N5D7, F1MQF9, Q00194, P00515, E1BIL3	1806	37	16802	2.263	1	0.587014	50.6786
SMART	SM00389:HOX	36	1.86335	0.0396946	F1N0Z3, E1BNZ8, Q2TEA4, F1N693, E1BAG4, E1BPC7, E1B9T6, E7E1K7, F1MPW8, F1MNA3, E1BL43, F1N264, F1MJX6, A4FV76, E1BG70, E1BGM6, F1MZE3, E1BCL1, F1N3B5, F1MT17, Q1LZF1, G3N3S1, F1MQ55, A7MB41, F1N7E7, E1BLB9, E1BAD7, F1MKX5, E1B855, E1BD77, E1BMT1, A6H796, F1MIH1, E1BCZ9, E1B7H9, Q08DG7	1193	191	8740	1.38083	1	0.484653	44.1099
UP_SEQ_FEATURE	active site:4-aspartylphosphate intermediate	3	0.15528	0.0401658	A1A4J6, Q0VCY0, P57709	351	6	6267	8.92735	1	0.897863	48.7303
INTERPRO	IPR000048:IQ motif, EF-hand binding site	15	0.776398	0.0407672	E1BPX8, P06836, E1B933, E1BKW7, F1MCA3, F1MIM9, F1MG13, F1MM80, E1BP01, F1MMU9, F1MLR9, Q27991, G5E5L9, A0JN59, F1MMQ6	1806	79	16802	1.76647	1	0.593895	51.6692
GOTERM_CC_DIRECT	GO:0005912~adherens junction	8	0.414079	0.041055	E1BDN7, Q6URK6, E1BIS6, E1B7V9, Q3MHM6, E1BP33, E1BKA3, E1BFN3	1648	31	15461	2.42108	1	0.723163	46.6875
UP_SEQ_FEATURE	domain:RRM	7	0.362319	0.0412281	B0JYK8, Q1JPD6, Q2HJD4, Q0P5D2, G1K177, Q0P5L0, Q0V898, Q2KI24	351	46	6267	2.71702	1	0.89412	49.6473
INTERPRO	IPR003616:Post-SET domain	5	0.258799	0.0429432	E1BKN0, E1BLX2, F1MMY4, E1BGA4, E1B9N8	1806	13	16802	3.57824	1	0.609932	53.5491
INTERPRO	IPR005113:uDENN domain	5	0.258799	0.0429432	G5E5Q8, E1BJE1, F1MQ87, F1N032, A5D7B4	1806	13	16802	3.57824	1	0.609932	53.5491
COG_ONTOLOGY	Cytoskeleton	9	0.465839	0.0432897	G3N1C8, F1N1K6, E1BKW7, F1N5R7, Q3SYU6, F1MM80, E1BDX8, F1MK55, F1MMQ6	196	35	1671	2.19227	0.821993	0.578091	33.132
GOTERM_CC_DIRECT	GO:0000118~histone deacetylase complex	7	0.362319	0.0435345	E1B806, F1N616, F1MNA5, E1BFC1, G3X7K5, F1MGR3, E1BN65	1648	25	15461	2.62687	1	0.728652	48.7188
GOTERM_BP_DIRECT	GO:0030317~sperm motility	10	0.517598	0.0438294	F1N724, G3N1C8, F1MUW6, Q17QN9, E1BNR0, A6QNW6, E1BAJ3, E1BJB5, F1MQF9, F1MSJ5	1501	44	13824	2.09315	1	0.952571	56.1866
GOTERM_MF_DIRECT	GO:0005261~cation channel activity	5	0.258799	0.0439275	G3X6M4, F1MWK1, F1MP46, F1MR37, E1BK43	1418	13	13095	3.55186	1	0.656219	50.4847
KEGG_PATHWAY	bta04721:Synaptic vesicle cycle	11	0.569358	0.0441018	F1MGS2, A6QP02, Q0VCK5, P23956, P61420, P49951, Q08DS7, F1MP30, G3X7Z2, A4FV52, F1N1E0	658	63	7550	2.00343	0.999992	0.253267	44.523
GOTERM_MF_DIRECT	GO:0003713~transcription coactivator activity	21	1.08696	0.0442627	F1N551, B0JYK8, Q2KJJ0, A5PJW1, F1MFD2, F1MP49, F1MHZ3, Q3MHZ4, E1BNL6, F1N3I6, A7YY54, Q9BE97, E1B7Q6, E1BMT1, E1BP59, F1MD32, A6QNU4, F1N778, F1MRA1, Q0VCX4, F1MQ59	1418	124	13095	1.56396	1	0.649776	50.7556
GOTERM_BP_DIRECT	GO:0048593~camera-type eye morphogenesis	5	0.258799	0.0443176	F1N215, F1N3R6, A7E303, F1N5Z0, D7GLD0	1501	13	13824	3.54225	1	0.951549	56.5966
GOTERM_BP_DIRECT	GO:0007088~regulation of mitotic nuclear division	5	0.258799	0.0443176	A7Z018, F1MH26, E1BM39, E1BK00, E1BNH9	1501	13	13824	3.54225	1	0.951549	56.5966
GOTERM_BP_DIRECT	GO:0060065~uterus development	5	0.258799	0.0443176	G5E5C7, Q6VFT7, F1N786, E1BIM8, A7Z086	1501	13	13824	3.54225	1	0.951549	56.5966
GOTERM_BP_DIRECT	GO:0040018~positive regulation of multicellular organism growth	8	0.414079	0.0447027	Q08DJ8, E1BPM4, F1MU26, E1BLT3, A4IFF0, P80311, P27925, E1BKC4	1501	31	13824	2.37674	1	0.950192	56.9175
GOTERM_CC_DIRECT	GO:0035770~ribonucleoprotein granule	4	0.207039	0.0448269	E1BCC3, Q2TBT7, E1BIB4, Q2NKY8	1648	8	15461	4.69084	1	0.724172	49.7487
GOTERM_CC_DIRECT	GO:0017146~NMDA selective glutamate receptor complex	4	0.207039	0.0448269	F1MWI8, E1BK87, F1MP46, F1MR40	1648	8	15461	4.69084	1	0.724172	49.7487
INTERPRO	IPR000569:HECT	7	0.362319	0.0451075	F1MLS5, E1B7Q7, A6QP00, E1B782, F1N0L2, A2VDP7, E1BNY9	1806	25	16802	2.60496	1	0.624999	55.3504
INTERPRO	IPR002293:Amino acid/polyamine transporter I	7	0.362319	0.0451075	A4IFD5, F1MLQ4, E1B761, E1BCX7, A0JNF2, A0JNI9, E1BCI3	1806	25	16802	2.60496	1	0.624999	55.3504
GOTERM_BP_DIRECT	GO:0045444~fat cell differentiation	12	0.621118	0.0452734	F1MB52, E1B7Q6, P10894, E1B7S6, F1MU26, A9CR99, M5FMX2, A6QNU4, Q08E53, E1BKC4, E1BJC1, P55106	1501	58	13824	1.90549	1	0.949484	57.3889
GOTERM_MF_DIRECT	GO:0004871~signal transducer activity	22	1.13872	0.0454706	E1BH60, E1BJK1, Q4JF29, E1BNT8, F1MLZ2, F1MJE0, Q3SYZ2, Q32LB3, P10895, F1MF11, F1MYE0, P10894, E1BHX7, F1MGG8, A5D7G2, F1MJV1, F1N510, F1MRH8, E1BPP7, F1N4S9, Q0VCX4, P57709	1418	132	13095	1.53914	1	0.650827	51.7205
SMART	SM00209:TSP1	14	0.724638	0.0456442	F1MVP0, E1BCW5, F1N102, Q9TT93, Q9GLX9, F1N2M2, Q5BIR3, E1BKL4, A5PJP9, F1MF39, E1BI72, E1BE11, E1B9M5, F1N303	1193	58	8740	1.76836	1	0.522869	48.8829
INTERPRO	IPR003644:Na-Ca exchanger/integrin-beta4	4	0.207039	0.0458146	E1BN52, F1MFH3, E1B864, F1N740	1806	8	16802	4.65172	1	0.627465	55.9245
INTERPRO	IPR015433:Phosphatidylinositol Kinase	4	0.207039	0.0458146	F1MBU9, A6QPT0, E1BE66, O02811	1806	8	16802	4.65172	1	0.627465	55.9245
INTERPRO	IPR019542:Enhancer of polycomb-like, N-terminal	4	0.207039	0.0458146	E1BK85, E1B8Z0, G3N0D9, E1BPS1	1806	8	16802	4.65172	1	0.627465	55.9245
KEGG_PATHWAY	bta04921:Oxytocin signaling pathway	20	1.0352	0.0459847	E1BQ12, F1MT98, E1BMP3, P19754, F1MGR9, F1MSU2, Q8WN96, Q8WN95, F1MHZ1, E1BEM1, F1MTK5, P98201, Q2HJF7, E1BDQ4, P10894, E1BIM8, E1BHX7, E1B9K3, F1MG30, A4IFJ5	658	145	7550	1.58264	0.999995	0.257238	45.9337
GOTERM_MF_DIRECT	GO:0015297~antiporter activity	7	0.362319	0.0464546	A4IFD5, F1MLQ4, E1B761, E1BCX7, A0JNF2, A0JNI9, E1BCI3	1418	25	13095	2.58575	1	0.650027	52.4934
GOTERM_MF_DIRECT	GO:0005319~lipid transporter activity	4	0.207039	0.0466656	P55156, M5FMV8, E1BPS5, G5E556	1418	8	13095	4.61742	1	0.643084	52.6576
GOTERM_BP_DIRECT	GO:0030901~midbrain development	7	0.362319	0.0469973	F6QT88, E1BP59, E1B9T6, E1BL43, F1MIH1, E1BLZ5, E1B6Z2	1501	25	13824	2.57876	1	0.952567	58.7835
GOTERM_BP_DIRECT	GO:0070198~protein localization to chromosome, telomeric region	4	0.207039	0.0469992	Q0VCT3, E1B8R5, E1BMY0, F1MLY7	1501	8	13824	4.60493	1	0.950058	58.7851
GOTERM_BP_DIRECT	GO:1900364~negative regulation of mRNA polyadenylation	4	0.207039	0.0469992	Q5EAB2, F1N4V2, Q6T8E9, Q0V898	1501	8	13824	4.60493	1	0.950058	58.7851
GOTERM_BP_DIRECT	GO:0050775~positive regulation of dendrite morphogenesis	4	0.207039	0.0469992	E1BK00, E1BNH9, Q08E31, F1MT17	1501	8	13824	4.60493	1	0.950058	58.7851
GOTERM_BP_DIRECT	GO:0002281~macrophage activation involved in immune response	4	0.207039	0.0469992	E1BMP9, Q4JF29, A0JND4, Q2TBI0	1501	8	13824	4.60493	1	0.950058	58.7851
UP_SEQ_FEATURE	zinc finger region:C2H2-type 12	4	0.207039	0.0476339	Q95LI3, A6QR00, Q29RK0, Q0VCC5	351	15	6267	4.76125	1	0.917821	54.8582
UP_SEQ_FEATURE	compositionally biased region:Ala-rich	4	0.207039	0.0476339	A7Z017, Q29RK0, A6QQ94, Q5EA36	351	15	6267	4.76125	1	0.917821	54.8582
INTERPRO	IPR000859:CUB domain	11	0.569358	0.0476918	F1MVP0, F1MKV7, F1MRN5, Q29RN8, F1N590, Q5E9P5, E1BPS6, E1BMX5, F1MKP1, E1BNA9, F1MWW8	1806	52	16802	1.96803	1	0.639237	57.415
GOTERM_BP_DIRECT	GO:0008104~protein localization	10	0.517598	0.049723	E1BM51, F1MB52, E1BLM2, G3N1E4, F1MF64, F1MP46, F1N0W4, F1ML95, F1N1F1, F1MDF3	1501	45	13824	2.04664	1	0.955938	60.9009
UP_KEYWORDS	Cell adhesion	26	1.34576	0.0497291	Q6URK6, A7MBJ4, A6QQ97, A2VDQ6, A6QLK4, E1BAU4, E1BIA5, F1MZU6, F1N416, Q0VCX4, E1BDD5, E1B864, Q9GLX9, F1MVW3, Q3MHM6, F1MKX3, A5D7B7, G3N1F4, G3N2T6, F1MMW5, F1N446, F1MQT9, E1BDF9, G1K1H0, F1N3M3, Q27991	1884	168	17808	1.46285	1	0.628482	49.9187
GOTERM_MF_DIRECT	GO:0004842~ubiquitin-protein transferase activity	29	1.50104	0.0499158	G3MYI7, F1MAV4, E1BJG5, F1MVD5, Q27U16, Q1RML1, E1B7Q7, E1BJS7, A6QP00, E1BP22, Q5BIM8, E1B782, F1N510, Q0VBY8, Q1LZF1, A7MB67, E1BLB1, F1MJP6, E1BNY9, A2VDP7, E1BBP0, F1MLS5, G3X8E4, E1BD59, E1BE13, E1BJV8, F1N0L2, A2VEA3, G5E5R5	1418	188	13095	1.42452	1	0.659993	55.1211
SMART	SM00638:LPD_N	3	0.15528	0.050699	P55156, E1BNR0, M5FMV8	1193	3	8740	7.32607	1	0.549918	52.6371
GOTERM_CC_DIRECT	GO:0090575~RNA polymerase II transcription factor complex	7	0.362319	0.0516799	Q9BE97, F1N551, E1BQ37, E1BJG5, Q8SQG8, G3N361, Q5E9B6	1648	26	15461	2.52584	1	0.760831	54.8947
GOTERM_BP_DIRECT	GO:0060348~bone development	8	0.414079	0.0520669	E1BEN9, F1MW39, F1N085, E1BAT5, P80311, F1MMY4, E1BF27, P13213	1501	32	13824	2.30247	1	0.960032	62.6389
GOTERM_CC_DIRECT	GO:0030018~Z disc	14	0.724638	0.0522537	E1BDC7, G3MZU6, F1MCH1, E1BA93, F1MTK5, F1MF78, Q2KJJ9, E1BL04, E1BDQ4, F1MQI3, Q0VCX4, Q0III6, A4IFK4, M0QW12	1648	75	15461	1.75125	1	0.751236	55.3025
UP_KEYWORDS	Repressor	23	1.19048	0.0524891	A7Z017, G3N163, F1N616, A6QPT6, A0JND4, Q1LZD9, Q08DB4, Q3B7M4, Q08E02, A5PK74, A4IFD2, Q24K09, P98201, A6H737, Q8SQ19, F1MNA5, A7YY73, Q28147, Q5E9D3, Q3B7M7, E1BKA3, A4FV57, Q0V898	1884	145	17808	1.49932	1	0.627856	51.8552
KEGG_PATHWAY	bta04720:Long-term potentiation	11	0.569358	0.0529279	E1BQ12, Q2HJF7, P19754, P10894, E1BHX7, Q8WN96, F1MD32, Q8WN95, F1MP46, F1MR40, F1MDE0	658	65	7550	1.94178	0.999999	0.284908	50.8542
UP_SEQ_FEATURE	domain:Leucine-zipper	6	0.310559	0.0529498	A7Z017, Q8SQ19, A7YY73, P27925, A4IFD2, A7YY54	351	37	6267	2.89536	1	0.931321	58.7938
INTERPRO	IPR017871:ABC transporter, conserved site	10	0.517598	0.0532914	F6RLQ6, A7Z044, E1BKR6, E1BCG1, F1MIP7, A4FUE2, G3MWN6, G3MW11, G5E556, F1N3Y6	1806	46	16802	2.02249	1	0.677703	61.5838
GOTERM_CC_DIRECT	GO:0005847~mRNA cleavage and polyadenylation specificity factor complex	5	0.258799	0.053726	Q1JPD6, E1BCT7, Q10569, Q2HJD4, G1K177, F1MXR8	1648	14	15461	3.3506	1	0.748052	56.333
GOTERM_CC_DIRECT	GO:0000407~pre-autophagosomal structure	5	0.258799	0.053726	A6QQS9, Q3T904, E1BH30, F1MQ92, Q08DY8	1648	14	15461	3.3506	1	0.748052	56.333
GOTERM_CC_DIRECT	GO:0030286~dynein complex	6	0.310559	0.0542741	F1N724, F1N1K6, F1MK55, E1BLB4, F1MSP8, E1B9R5	1648	20	15461	2.8145	1	0.739003	56.711
GOTERM_MF_DIRECT	GO:0017112~Rab guanyl-nucleotide exchange factor activity	7	0.362319	0.0550705	F1MKR0, G5E5Q8, E1BJE1, F1N032, G5E5D0, F1MDF3, A5D7B4	1418	26	13095	2.4863	1	0.688665	58.7832
INTERPRO	IPR005112:dDENN domain	5	0.258799	0.0551575	G5E5Q8, E1BJE1, F1MQ87, F1N032, A5D7B4	1806	14	16802	3.32265	1	0.687329	62.8854
INTERPRO	IPR001194:DENN domain	5	0.258799	0.0551575	G5E5Q8, E1BJE1, F1MQ87, F1N032, A5D7B4	1806	14	16802	3.32265	1	0.687329	62.8854
INTERPRO	IPR002867:Zinc finger, C6HC-type	5	0.258799	0.0551575	F1MDC0, F1MH26, E1BM39, F1MEX6, A2VEA3	1806	14	16802	3.32265	1	0.687329	62.8854
INTERPRO	IPR010569:Myotubularin-related	5	0.258799	0.0551575	G5E5Q8, E1BNH5, A2VDL5, E1B9S5, A6QLT2	1806	14	16802	3.32265	1	0.687329	62.8854
GOTERM_BP_DIRECT	GO:0035987~endodermal cell differentiation	7	0.362319	0.0556992	F1N7Q7, Q9GLE5, E1B7H2, E1BJ34, E1BI98, P52176, A7E303	1501	26	13824	2.47958	1	0.966466	65.1888
GOTERM_BP_DIRECT	GO:0001569~patterning of blood vessels	7	0.362319	0.0556992	F1N4C5, E1BBN3, E1BFX6, E1BMX5, E1BJP4, F1MVT0, Q0VCX4	1501	26	13824	2.47958	1	0.966466	65.1888
INTERPRO	IPR000585:Hemopexin-like domain	6	0.310559	0.0559594	Q9GLE5, O77656, E1BK30, O18767, P52176, M5FK68	1806	20	16802	2.79103	1	0.689496	63.4318
INTERPRO	IPR018487:Hemopexin-like repeats	6	0.310559	0.0559594	Q9GLE5, O77656, E1BK30, O18767, P52176, M5FK68	1806	20	16802	2.79103	1	0.689496	63.4318
INTERPRO	IPR000313:PWWP	6	0.310559	0.0559594	E1B8Z0, F1MPD5, G3N0D9, F1MMY4, F1MY77, E1BPS1	1806	20	16802	2.79103	1	0.689496	63.4318
GOTERM_BP_DIRECT	GO:0007417~central nervous system development	10	0.517598	0.0561152	F1N2J5, F1N4K6, E1BIM8, F1MB07, P02459, Q0V8B6, E1BLM2, E1BFN3, F1N4I0, F1N264	1501	46	13824	2.00214	1	0.965507	65.4701
GOTERM_BP_DIRECT	GO:0032922~circadian regulation of gene expression	10	0.517598	0.0561152	A6QQE3, B0JYK8, F1MLX5, Q08E02, F1MBB0, E1BHD1, E1BPY4, E1BLF5, E1B9X1, F1MQ59	1501	46	13824	2.00214	1	0.965507	65.4701
UP_SEQ_FEATURE	zinc finger region:C2H2-type 11	4	0.207039	0.056276	Q95LI3, A6QR00, Q29RK0, Q0VCC5	351	16	6267	4.46368	1	0.93581	61.09
GOTERM_BP_DIRECT	GO:1902476~chloride transmembrane transport	11	0.569358	0.0563721	E1BKK3, A6QNW6, E1BAI4, A6QLE6, E1BLQ0, F1N299, Q58DD2, F1N4L1, E1BD54, E1BDR3, A4FV52	1501	53	13824	1.91148	1	0.964207	65.6427
GOTERM_MF_DIRECT	GO:0015301~anion:anion antiporter activity	5	0.258799	0.0563887	E1BKK3, A6QNW6, Q58DD2, E1BD54, E1BDR3	1418	14	13095	3.29816	1	0.689525	59.6738
GOTERM_MF_DIRECT	GO:0004864~protein phosphatase inhibitor activity	5	0.258799	0.0563887	A7Z026, F1N1P8, Q28147, Q3B7M7, F1MK25	1418	14	13095	3.29816	1	0.689525	59.6738
UP_SEQ_FEATURE	compositionally biased region:Poly-Glu	9	0.465839	0.0565731	A2VDN6, P79126, A7MB80, A6QLA6, P09851, Q9TTK4, G3N351, Q0V8K7, Q2NKY8	351	75	6267	2.14256	1	0.930208	61.2891
GOTERM_BP_DIRECT	GO:0006405~RNA export from nucleus	5	0.258799	0.0568753	F1MM55, E1BCV4, E1BG57, E1BIX5, A6QM02	1501	14	13824	3.28924	1	0.963444	65.9785
GOTERM_BP_DIRECT	GO:0031016~pancreas development	5	0.258799	0.0568753	A6H796, F1MBH4, G3X6U1, A6QPM5, Q0VCX4	1501	14	13824	3.28924	1	0.963444	65.9785
GOTERM_BP_DIRECT	GO:0006306~DNA methylation	5	0.258799	0.0568753	F1MFD2, A7MBC4, F1MPD5, E1BCV0, A5PK11	1501	14	13824	3.28924	1	0.963444	65.9785
INTERPRO	IPR017448:Speract/scavenger receptor-related	8	0.414079	0.0575707	A5PJQ2, A6H737, F1N7K7, P85521, A1L5C6, H9BDV2, F1MLU5, Q8MJ24	1806	33	16802	2.25538	1	0.696899	64.507
INTERPRO	IPR018303:P-type ATPase, phosphorylation site	8	0.414079	0.0575707	G3X6T7, A1A4J6, Q0VCY0, F1MKI1, F1MRN7, F1N7J2, F1MW32, P57709	1806	33	16802	2.25538	1	0.696899	64.507
INTERPRO	IPR001007:von Willebrand factor, type C	8	0.414079	0.0575707	E1BDN7, P02453, F2FB39, G3X6N5, P02459, F1N2Y2, F1N740, A0JNC8	1806	33	16802	2.25538	1	0.696899	64.507
SMART	SM00004:NL	4	0.207039	0.0578959	G3X812, F1MPE9, F1N7Z6, E1BF00	1193	7	8740	4.18632	1	0.58826	57.5414
SMART	SM01026:SM01026	4	0.207039	0.0578959	F1MWY0, F1MF64, Q9TTK4, F1MG90	1193	7	8740	4.18632	1	0.58826	57.5414
GOTERM_BP_DIRECT	GO:0051225~spindle assembly	6	0.310559	0.0579827	E1BAN8, A7Z018, F1MGM4, E1B8R5, F1N3F6, A6QNR2	1501	20	13824	2.76296	1	0.963997	66.7066
GOTERM_BP_DIRECT	GO:0097150~neuronal stem cell population maintenance	6	0.310559	0.0579827	E1BPQ1, E1BDN7, A5D7A1, F1N4K5, F1MM80, E1BC93	1501	20	13824	2.76296	1	0.963997	66.7066
GOTERM_BP_DIRECT	GO:0021983~pituitary gland development	6	0.310559	0.0579827	Q2TEA4, E1BMT1, F1MCY1, A6H796, P27925, Q1LZF1	1501	20	13824	2.76296	1	0.963997	66.7066
UP_SEQ_FEATURE	zinc finger region:C2H2-type 3	7	0.362319	0.0582011	Q95LI3, A6QR00, Q29RK0, Q3B7M4, Q0VCC5, A6QQW0, A4FV57	351	50	6267	2.49966	1	0.929113	62.3635
UP_SEQ_FEATURE	zinc finger region:C2H2-type 2	7	0.362319	0.0582011	Q95LI3, A6QR00, Q29RK0, Q3B7M4, Q0VCC5, A6QQW0, G3N351	351	50	6267	2.49966	1	0.929113	62.3635
KEGG_PATHWAY	bta05166:HTLV-I infection	32	1.65631	0.0583951	E1BEN9, A7Z034, E1BEL4, A6QPT0, E1BE66, F1MGR9, A7MBB7, F1MLY7, P98201, E1B847, F1MDH3, Q0VCX4, F1MT98, E1BQ12, P19754, F1MSU2, F1MBB0, G3N2W8, E1BJP4, E1BKJ5, P30535, P27925, E1BAB6, E1B9K3, E1BP59, E1BCV1, F1MD32, E1BE98, E1BMX5, F1MRA1, F1MQI1, F1N1Z3	658	267	7550	1.37518	1	0.304007	54.4339
UP_KEYWORDS	ATP-binding	105	5.43478	0.0586853	E1B7V7, Q3ZBV8, Q58DM2, Q3T084, E1BC41, Q2NKY8, F1MNE5, F1MEM4, E1BIM8, F1MRN7, F1MBL6, F1N3B9, G3MWN6, Q08DH8, Q1RMS2, Q9TTA5, E1BB52, F1MB07, E1B768, E1BLV6, F1MIP7, E1BBT9, Q27991, G5E556, G3MYX8, F1MMQ6, E1BMP3, E1B7X9, E1B754, F1N3W6, E1BKW7, Q1RML1, Q9TTS3, Q32PF2, E1BFB4, E1BP01, F1MU39, F1MW32, Q75WB5, G3N3W5, G8JKX7, Q3SYZ2, P21146, E1BLB6, E1B748, F1MZF7, E1BCG1, Q0VCY0, Q29RT6, F6RLQ6,…	1884	848	17808	1.17038	1	0.650204	55.9526
GOTERM_CC_DIRECT	GO:0008091~spectrin	3	0.15528	0.05878	E1BLT3, F1MYC9, F1MMQ8	1648	4	15461	7.03626	1	0.75535	59.7045
INTERPRO	IPR026966:Fibronectin type III C-terminal domain	3	0.15528	0.0597048	G3MYY6, E1BBI3, E1BLM2	1806	4	16802	6.97757	1	0.707284	65.8852
INTERPRO	IPR004179:Sec63 domain	3	0.15528	0.0597048	E1B7B1, F1MFR1, E1BH78	1806	4	16802	6.97757	1	0.707284	65.8852
INTERPRO	IPR006558:LamG-like jellyroll fold	3	0.15528	0.0597048	F1N7Z6, E1BF00, E1BP05	1806	4	16802	6.97757	1	0.707284	65.8852
INTERPRO	IPR009110:Nuclear receptor coactivator, interlocking	3	0.15528	0.0597048	F1MD32, E1BPY4, F1MVD0	1806	4	16802	6.97757	1	0.707284	65.8852
INTERPRO	IPR016251:Tyrosine-protein kinase, non-receptor Jak/Tyk2	3	0.15528	0.0597048	E1BEL4, F1MCX4, E1BCP6	1806	4	16802	6.97757	1	0.707284	65.8852
INTERPRO	IPR014012:Helicase/SANT-associated, DNA binding	3	0.15528	0.0597048	E1BC33, F1MLB1, A5PKK5	1806	4	16802	6.97757	1	0.707284	65.8852
GOTERM_BP_DIRECT	GO:0031338~regulation of vesicle fusion	8	0.414079	0.0601493	F1MS95, A5PK17, O97790, F1MRD8, Q32KR8, G3MXN3, F1MEY0, E1BPA1	1501	33	13824	2.23269	1	0.966652	68.0886
GOTERM_BP_DIRECT	GO:0045053~protein retention in Golgi apparatus	3	0.15528	0.0608129	E1BPX1, E1BIF6, E1BPZ1	1501	4	13824	6.9074	1	0.966255	68.5009
GOTERM_BP_DIRECT	GO:0016458~gene silencing	3	0.15528	0.0608129	E1BKN0, E1BE01, Q24K09	1501	4	13824	6.9074	1	0.966255	68.5009
GOTERM_BP_DIRECT	GO:0090656~t-circle formation	3	0.15528	0.0608129	F1N7Q0, Q32PI0, Q08DH8	1501	4	13824	6.9074	1	0.966255	68.5009
GOTERM_BP_DIRECT	GO:0033152~immunoglobulin V(D)J recombination	3	0.15528	0.0608129	F1MB07, A4IFD2, E1BLB6	1501	4	13824	6.9074	1	0.966255	68.5009
GOTERM_BP_DIRECT	GO:0051304~chromosome separation	3	0.15528	0.0608129	F1MPS0, F1N3G4, E1B7X9	1501	4	13824	6.9074	1	0.966255	68.5009
GOTERM_BP_DIRECT	GO:0043045~DNA methylation involved in embryo development	3	0.15528	0.0608129	F1MPD5, E1BJG5, Q24K09	1501	4	13824	6.9074	1	0.966255	68.5009
GOTERM_BP_DIRECT	GO:0072429~response to intra-S DNA damage checkpoint signaling	3	0.15528	0.0608129	A6QQB5, F1N7Q0, E1B8J2	1501	4	13824	6.9074	1	0.966255	68.5009
GOTERM_BP_DIRECT	GO:0048752~semicircular canal morphogenesis	3	0.15528	0.0608129	E1BPM4, E1B7S6, F1N264	1501	4	13824	6.9074	1	0.966255	68.5009
GOTERM_BP_DIRECT	GO:0043576~regulation of respiratory gaseous exchange	3	0.15528	0.0608129	E1BJM5, Q08E53, F1MIH1	1501	4	13824	6.9074	1	0.966255	68.5009
GOTERM_BP_DIRECT	GO:0090630~activation of GTPase activity	12	0.621118	0.0618511	F1N0Y1, F1MS95, E1BJ31, E1BP38, F1MCG4, A5PK17, O97790, F1MRD8, Q32KR8, G3MXN3, F1MEY0, E1BPA1	1501	61	13824	1.81178	1	0.966582	69.1359
GOTERM_CC_DIRECT	GO:0035097~histone methyltransferase complex	4	0.207039	0.0620363	E1BND5, E1BPQ2, E1BKN0, E1BDK1	1648	9	15461	4.16963	1	0.762801	61.7463
GOTERM_MF_DIRECT	GO:0042626~ATPase activity, coupled to transmembrane movement of substances	10	0.517598	0.062111	F6RLQ6, G5E593, E1BKR6, E1BCG1, F1MIP7, G3MWN6, G3MW11, E1BK38, G5E556, F1N3Y6	1418	47	13095	1.96486	1	0.717686	63.3349
KEGG_PATHWAY	bta05016:Huntington's disease	25	1.294	0.0623606	F1N724, B0JYK8, Q0VCK5, E1BN01, G3MZY8, E1BNX4, E1BNU2, Q5EA95, A0JNC9, P49951, P27925, F1MK55, E1BLB4, Q08DS7, F1MUW4, G3N1C8, F1MTR3, A5PKJ3, Q8SQ19, P10894, E1BHX7, F1N5R7, F1MD32, P52505, F1MSP8	658	199	7550	1.44148	1	0.31547	56.8781
KEGG_PATHWAY	bta05031:Amphetamine addiction	11	0.569358	0.0628518	Q2HJF7, Q8SQ19, F1MWI8, E1BK87, E1BNX4, A6QLQ3, F1MP46, F1MTK5, P27925, A4FUY2, F1MR40	658	67	7550	1.88382	1	0.311758	57.1723
INTERPRO	IPR002077:Voltage-dependent calcium channel, alpha-1 subunit	4	0.207039	0.0633591	F1MTK5, F1MR37, G3X7Z2, F1N1E0	1806	9	16802	4.13486	1	0.726102	68.1287
INTERPRO	IPR004841:Amino acid permease domain	4	0.207039	0.0633591	F1MS08, F1MKC8, F1N2X1, A8KC65	1806	9	16802	4.13486	1	0.726102	68.1287
INTERPRO	IPR000756:Diacylglycerol kinase, accessory domain	4	0.207039	0.0633591	E1BGA9, G5E5G8, E1B7K6, F1MCG9	1806	9	16802	4.13486	1	0.726102	68.1287
INTERPRO	IPR001263:Phosphoinositide 3-kinase, accessory (PIK) domain	4	0.207039	0.0633591	F1MBU9, A6QPT0, E1BE66, O02811	1806	9	16802	4.13486	1	0.726102	68.1287
INTERPRO	IPR017878:TB domain	4	0.207039	0.0633591	F1N444, Q28019, E1BL59, F1MZD0	1806	9	16802	4.13486	1	0.726102	68.1287
UP_SEQ_FEATURE	repeat:WD 7	6	0.310559	0.0639591	Q2HJH6, Q9XSC3, Q3B7M6, A7MB12, P35605, Q9TTK4	351	39	6267	2.74688	1	0.9404	65.943
GOTERM_MF_DIRECT	GO:0005080~protein kinase C binding	4	0.207039	0.0644994	E1BG86, F1N127, P35605, F1MP88	1418	9	13095	4.10437	1	0.724077	64.769
GOTERM_MF_DIRECT	GO:0005222~intracellular cAMP activated cation channel activity	4	0.207039	0.0644994	E1BIS4, F1MW86, F1MZC9, Q00194	1418	9	13095	4.10437	1	0.724077	64.769
GOTERM_MF_DIRECT	GO:0005158~insulin receptor binding	4	0.207039	0.0644994	F1MYE0, F1MGG8, F1MJE0, A1A4L0	1418	9	13095	4.10437	1	0.724077	64.769
GOTERM_MF_DIRECT	GO:0051018~protein kinase A binding	4	0.207039	0.0644994	E1BG86, F1N127, F1N388, F1MP88	1418	9	13095	4.10437	1	0.724077	64.769
GOTERM_MF_DIRECT	GO:0000976~transcription regulatory region sequence-specific DNA binding	7	0.362319	0.064586	F1MM81, F1MTR3, E1BFC2, Q1LZD9, E1BQ37, E1BLK1, G3N361	1418	27	13095	2.39422	1	0.717225	64.8199
GOTERM_BP_DIRECT	GO:0007605~sensory perception of sound	16	0.828157	0.0648551	E1BPM4, Q3B7M3, E1B9T6, F1MTK5, P02453, A6QP02, G3N348, F1MHF3, F1MG13, E1BNQ0, P02459, E1BLT3, E1BP01, E1BIG4, E1BP05, E1BKC4	1501	91	13824	1.61932	1	0.970353	70.9057
GOTERM_BP_DIRECT	GO:0021952~central nervous system projection neuron axonogenesis	4	0.207039	0.0649454	F1N3R6, E1BLT3, Q08E53, F1MLJ7	1501	9	13824	4.09327	1	0.969002	70.9574
GOTERM_BP_DIRECT	GO:0031065~positive regulation of histone deacetylation	4	0.207039	0.0649454	F1MMW4, A9CR99, A7MB37, E1BKC4	1501	9	13824	4.09327	1	0.969002	70.9574
GOTERM_BP_DIRECT	GO:0001893~maternal placenta development	4	0.207039	0.0649454	F1MYB0, E1BJ30, E1BJ34, E1BAK6	1501	9	13824	4.09327	1	0.969002	70.9574
GOTERM_BP_DIRECT	GO:0030902~hindbrain development	4	0.207039	0.0649454	G3X6U1, E1BFN3, Q0VCX4, E1BK81	1501	9	13824	4.09327	1	0.969002	70.9574
GOTERM_BP_DIRECT	GO:0000288~nuclear-transcribed mRNA catabolic process, deadenylation-dependent decay	4	0.207039	0.0649454	A7MB98, E1BE73, F1MV20, F1MHU9	1501	9	13824	4.09327	1	0.969002	70.9574
GOTERM_BP_DIRECT	GO:0061099~negative regulation of protein tyrosine kinase activity	4	0.207039	0.0649454	F1N6S8, Q3SYU9, Q8SQG8, Q0V8K7	1501	9	13824	4.09327	1	0.969002	70.9574
GOTERM_BP_DIRECT	GO:0034063~stress granule assembly	4	0.207039	0.0649454	F1ML98, E1BDX8, E1BE88, E1BJ59	1501	9	13824	4.09327	1	0.969002	70.9574
GOTERM_BP_DIRECT	GO:0051569~regulation of histone H3-K4 methylation	4	0.207039	0.0649454	E1BPQ2, B2CML0, E1BKN0, F1N4V2	1501	9	13824	4.09327	1	0.969002	70.9574
UP_SEQ_FEATURE	zinc finger region:C2H2-type 10	4	0.207039	0.0656044	Q95LI3, A6QR00, Q29RK0, Q0VCC5	351	17	6267	4.20111	1	0.939298	66.9056
KEGG_PATHWAY	bta04750:Inflammatory mediator regulation of TRP channels	15	0.776398	0.0658703	E1BQ12, Q2HJF7, A6QPT0, P19754, P10894, E1BHX7, E1BIM8, E1BE66, E1B9K3, E1BCV1, Q8WN96, Q8WN95, F1MFA8, F1MG30, A4IFJ5	658	104	7550	1.65493	1	0.318635	58.9396
INTERPRO	IPR027359:Voltage-dependent potassium channel, four helix bundle domain	11	0.569358	0.0659767	E1BDC5, E1BC13, F1MMU9, F1MTK5, A4FV89, F1MQF9, F1MR37, G3X7Z2, M0QW12, F1N1E0, E1BK43	1806	55	16802	1.86069	1	0.737847	69.6494
INTERPRO	IPR000595:Cyclic nucleotide-binding domain	8	0.414079	0.0660593	E1BIS4, F1MW86, F1MZC9, E1BF56, F1N5D7, F1MQF9, Q00194, P00515	1806	34	16802	2.18904	1	0.735311	69.6962
UP_KEYWORDS	GTPase activation	11	0.569358	0.0669906	A7YY57, O97902, A7MB96, F1MM72, F1MBI8, A5D794, O97790, P09851, E1BB77, Q28013, F1MBT5	1884	56	17808	1.85669	1	0.681493	60.9392
GOTERM_MF_DIRECT	GO:0017137~Rab GTPase binding	12	0.621118	0.0670633	F1MS95, A5PK17, O97790, F1MET5, F1MRD8, Q32KR8, G3MXN3, G3MWR8, E1BKQ2, A6H7I2, F1MEY0, E1BPA1	1418	62	13095	1.78739	1	0.723905	66.2498
INTERPRO	IPR002464:DNA/RNA helicase, ATP-dependent, DEAH-box type, conserved site	6	0.310559	0.0671981	A6QLJ0, F1N734, F1MEM4, F1N3F6, Q28141, Q2NKY8	1806	21	16802	2.65812	1	0.738563	70.3353
KEGG_PATHWAY	bta04150:mTOR signaling pathway	10	0.517598	0.0672576	F1MYS7, A0A024QYS0, A6QPT0, F1MYE0, E1BE66, E1BCV1, E1BFB4, A6QQH7, E1BNT2, F1MHN4	658	59	7550	1.94477	1	0.318654	59.7291
KEGG_PATHWAY	bta02010:ABC transporters	8	0.414079	0.0681753	F6RLQ6, A7Z044, E1BKR6, E1BCG1, F1MIP7, G3MWN6, G5E556, F1N3Y6	658	42	7550	2.18556	1	0.316824	60.2437
GOTERM_MF_DIRECT	GO:0005540~hyaluronic acid binding	6	0.310559	0.0688945	F1N2J5, F1MYW1, F1MQT9, E1BBU2, Q8SQG8, E1BNJ1	1418	21	13095	2.63853	1	0.726782	67.2716
GOTERM_BP_DIRECT	GO:0007338~single fertilization	8	0.414079	0.0689583	Q6VFT7, A7VJS4, Q17QN9, E1BAG4, G1K1H0, F1MN54, F1MSA7, A7Z086	1501	34	13824	2.16703	1	0.973879	73.1686
GOTERM_BP_DIRECT	GO:0043087~regulation of GTPase activity	8	0.414079	0.0689583	E1BDB1, G3X755, E1BKA3, E1BFB4, E1BM92, E1B801, F1MZM7, F1MHN4	1501	34	13824	2.16703	1	0.973879	73.1686
INTERPRO	IPR008422:Homeobox KN domain	5	0.258799	0.0690353	E1B855, E1BPC7, F1MNA3, F1MZE3, E1BCL1	1806	15	16802	3.10114	1	0.745407	71.3396
SMART	SM00800:uDENN	5	0.258799	0.0690875	G5E5Q8, E1BJE1, F1MQ87, F1N032, A5D7B4	1193	12	8740	3.05253	1	0.644363	64.2383
COG_ONTOLOGY	Lipid metabolism / Secondary metabolites biosynthesis, transport, and catabolism	3	0.15528	0.0693385	F1MLE1, F1MKT7, F1MPW1	196	4	1671	6.39413	0.939343	0.60709	47.9772
GOTERM_BP_DIRECT	GO:0010332~response to gamma radiation	6	0.310559	0.0695689	A6QQE3, Q5E9V1, F1MB07, G3X6J7, E1B8X8, E1BLB6	1501	21	13824	2.63139	1	0.973433	73.4907
INTERPRO	IPR001841:Zinc finger, RING-type	36	1.86335	0.070773	E1BH40, F1MFB5, Q2TA44, F1MAV4, F1MSJ5, E1B7I1, E1BBE9, E1BKW8, Q27U16, F1N2S5, F1MNE1, E1B847, E1BP22, F1N510, F1MEB7, E1B928, E1BCM3, E1B9N8, E1BLB1, G3X6C1, F1MEX6, E1BP63, F1MP49, A7Z060, F1MPV5, F1MDC0, E1BBP0, A6QQE3, E1BM39, E1BD59, E1BGW9, F1MMY4, E1BPY6, A2VEA3, G5E5R5, E1BBI7	1806	253	16802	1.32381	1	0.751476	72.2599
SMART	SM00148:PLCXc	6	0.310559	0.0707993	E1BH60, F1MF11, P10895, P10894, E1BHX7, E1BNT8	1193	17	8740	2.58567	1	0.643038	65.1713
GOTERM_BP_DIRECT	GO:0035249~synaptic transmission, glutamatergic	5	0.258799	0.0711265	E1BKL6, F1MP30, A4FV52, F1N1E0, F1MDF3	1501	15	13824	3.06995	1	0.974324	74.2961
GOTERM_BP_DIRECT	GO:0048477~oogenesis	5	0.258799	0.0711265	A7MB49, E1BIM8, E1BP74, F1MM80, F1MFE5	1501	15	13824	3.06995	1	0.974324	74.2961
GOTERM_BP_DIRECT	GO:0001892~embryonic placenta development	5	0.258799	0.0711265	Q08DJ8, Q9BE97, E1B7Q6, E1BJ34, E1BC86	1501	15	13824	3.06995	1	0.974324	74.2961
SMART	SM00454:SAM	16	0.828157	0.0721729	E1BJ31, F1MB71, E1BEZ3, F1N6H6, E1BKK6, F6R8E7, F1N3R6, G3X7P4, E1BHH0, E1BKW5, Q58CP9, G5E618, E1B8R5, G3X6J7, E1BMY0, E1BIJ3	1193	74	8740	1.58401	1	0.640013	65.9036
INTERPRO	IPR014756:Immunoglobulin E-set	17	0.879917	0.0724311	F1N4C5, A7Z034, E1B7B1, E1BH40, G3X755, F1MGR9, F1MSU2, A7MBB7, F1MBB0, E1BAA2, P98201, E1BE25, E1BK86, E1BJS7, F1MCQ1, F1MPE1, E1BH78	1806	101	16802	1.56592	1	0.756929	73.112
KEGG_PATHWAY	bta05222:Small cell lung cancer	13	0.672878	0.0728826	A7Z034, A6QPT0, E1BE66, F1MYX9, E1BNU2, F1MUW4, F1N7Q7, F1MD77, A0A024QYS0, F1N0T1, F1MJY9, E1BCV1, F1MZU6	658	87	7550	1.71453	1	0.329678	62.7888
KEGG_PATHWAY	bta04530:Tight junction	13	0.672878	0.0728826	E1BJF6, E1B7V9, E1BPX8, F1MZ23, E1BIM8, F6RHP0, F1MMT3, F1MU39, A5D7Q4, Q27991, E1BPQ9, E1BLF1, A6H7I2	658	87	7550	1.71453	1	0.329678	62.7888
INTERPRO	IPR000203:GPS domain	7	0.362319	0.0729596	E1BLM8, F1MHH5, E1BC86, F1N6Y9, F1MRZ3, E1BJ11, E1B9M5	1806	28	16802	2.32586	1	0.756718	73.3784
INTERPRO	IPR006586:ADAM, cysteine-rich	7	0.362319	0.0729596	F1MVP0, Q9TT93, A5D7M5, F1MIY8, G1K1H0, F1MRA8, F1N303	1806	28	16802	2.32586	1	0.756718	73.3784
UP_SEQ_FEATURE	repeat:WD 6	7	0.362319	0.0733107	Q2HJH6, A5D7H2, Q9XSC3, Q3B7M6, A7MB12, P35605, Q9TTK4	351	53	6267	2.35817	1	0.952426	71.0837
KEGG_PATHWAY	bta04722:Neurotrophin signaling pathway	17	0.879917	0.0750024	A7Z034, A6QPT0, A6QPT6, E1BDK1, E1BE66, F1N4K5, E1B716, E1BMF4, Q2HJF7, F1MYE0, E1B847, F1N7C3, F1MJV1, F1MRH8, E1BCV1, F1N664, G3X6J7	658	125	7550	1.56049	1	0.332258	63.885
INTERPRO	IPR008250:P-type ATPase, A domain	8	0.414079	0.0752617	G3X6T7, A1A4J6, Q0VCY0, F1MKI1, F1MRN7, F1N7J2, F1MW32, P57709	1806	35	16802	2.1265	1	0.764996	74.5099
INTERPRO	IPR001757:Cation-transporting P-type ATPase	8	0.414079	0.0752617	G3X6T7, A1A4J6, Q0VCY0, F1MKI1, F1MRN7, F1N7J2, F1MW32, P57709	1806	35	16802	2.1265	1	0.764996	74.5099
UP_SEQ_FEATURE	zinc finger region:C2H2-type 6	5	0.258799	0.075447	Q95LI3, A6QR00, Q29RK0, Q0VCC5, A6QQW0	351	29	6267	3.0784	1	0.952295	72.1511
UP_SEQ_FEATURE	zinc finger region:C2H2-type 7	5	0.258799	0.075447	Q95LI3, A6QR00, Q29RK0, Q0VCC5, A6QQW0	351	29	6267	3.0784	1	0.952295	72.1511
UP_SEQ_FEATURE	domain:C2	4	0.207039	0.0755897	P10895, P10894, P09851, A4IFJ5	351	18	6267	3.96771	1	0.948131	72.2211
GOTERM_CC_DIRECT	GO:0009986~cell surface	45	2.32919	0.0756732	E1BEN9, E1BJQ3, F1MPE9, E1BC86, A7YY44, A6QLK4, Q2TBI0, F1MY84, F1MPW1, G3X812, A5PJQ2, E1BP22, A1L5C6, P49259, E1BIG4, A6QL97, E1BJ31, E1B864, F1N4K6, E1BPP5, G3X755, F1MVW3, F1MCH1, F1N2M2, E1BC74, Q29RV1, E1BM92, A5D7B7, F1MDL2, A4IFP2, P13213, E1BCG1, E1BBI3, F1MQT9, F1MIP7, A5D7M5, F1MIY8, F1MNS5, F1MRZ3, G1K1H0, E1BMN9, E1BI72, E1BPQ9, F1MPE1, G3MYX8	1648	332	15461	1.27161	1	0.81929	69.2928
GOTERM_BP_DIRECT	GO:0048565~digestive tract development	7	0.362319	0.0758203	G5E5C7, F1MLX5, F1N551, E1B864, E1B949, E1BI59, E1BC86	1501	28	13824	2.30247	1	0.978963	76.5852
GOTERM_BP_DIRECT	GO:0086010~membrane depolarization during action potential	7	0.362319	0.0758203	F1MMU9, F1MTK5, F1MR37, G3X7Z2, M0QW12, F1N1E0, E1BK43	1501	28	13824	2.30247	1	0.978963	76.5852
GOTERM_BP_DIRECT	GO:0001568~blood vessel development	7	0.362319	0.0758203	E1BPQ1, F1MXZ6, P02453, E1BC74, F1MYX9, G3X6U1, Q1LZF1	1501	28	13824	2.30247	1	0.978963	76.5852
INTERPRO	IPR026823:Complement Clr-like EGF domain	6	0.310559	0.079592	E1B9K4, F1N444, F1N6H1, E1BE11, F1MZD0, E1BGJ0	1806	22	16802	2.5373	1	0.781888	76.5166
SMART	SM00033:CH	13	0.672878	0.0800029	E1BE25, F1MHF3, E1BM27, F1MGT1, Q3SYU6, A4IFA0, E1BLT3, F1MM80, F1MRT9, F1MYC9, E1BL45, F1MF78, G3MWR8	1193	57	8740	1.67086	1	0.669298	69.8115
GOTERM_BP_DIRECT	GO:0046777~protein autophosphorylation	19	0.983437	0.0804463	E1BJM5, E1BCC3, F1MKW8, E1BJG5, F1MP49, E1BEM1, F1MDD9, Q3SYZ2, F1N3K4, E1B8H0, F1MLY7, Q2HJF7, F1MWF1, F1MBL6, E1BFB4, A6QQH7, A5D791, E1BP01, E1B9M6	1501	117	13824	1.49562	1	0.982633	78.6517
KEGG_PATHWAY	bta04120:Ubiquitin mediated proteolysis	18	0.931677	0.0809806	E1BK00, A2VDP7, E1BNY9, E1BAB6, A6QQE3, F1MLS5, A5PKG6, Q1RML1, E1B7Q7, E1B847, Q5BIM8, E1BE13, E1B782, F1N510, Q0VBY8, A6QNS2, F1N0L2, E1BIE5	658	136	7550	1.51864	1	0.348751	66.818
GOTERM_CC_DIRECT	GO:0031080~nuclear pore outer ring	4	0.207039	0.0818085	F1MM55, E1BCV4, A7Z089, F1MNL8	1648	10	15461	3.75267	1	0.834316	72.2129
GOTERM_CC_DIRECT	GO:0031235~intrinsic component of the cytoplasmic side of the plasma membrane	4	0.207039	0.0818085	F1MBI8, P09851, E1BB77, Q28013	1648	10	15461	3.75267	1	0.834316	72.2129
GOTERM_BP_DIRECT	GO:2001243~negative regulation of intrinsic apoptotic signaling pathway	6	0.310559	0.0823311	F1MNE5, E1BIM8, Q3B7M7, E1BCV0, P52176, A5D7U7	1501	22	13824	2.51178	1	0.983401	79.4432
GOTERM_CC_DIRECT	GO:0034399~nuclear periphery	5	0.258799	0.0824465	E1BCV4, F1N1V3, F1MNL8, A5PJZ5, E1BIX5	1648	16	15461	2.93177	1	0.827506	72.5012
GOTERM_BP_DIRECT	GO:0007155~cell adhesion	26	1.34576	0.0832317	O18977, F1MYW1, A4FV05, A7MBJ4, A6QQ97, A6QLK4, F1N2J5, E1BIM8, F1MMT3, F1MZU6, Q0VCX4, F1MN25, F1N4K6, Q9GLX9, F1MM03, F1MYX9, A5D7B7, F1MPI1, E1BNJ1, G3N1F4, G3N2T6, Q3ZCH5, F1MQT9, G1K1H0, Q27991, F1MQI1	1501	173	13824	1.38414	1	0.983296	79.8115
INTERPRO	IPR011598:Myc-type, basic helix-loop-helix (bHLH) domain	17	0.879917	0.0833005	E1BC87, E1BPH8, A9CR99, F1MVD0, E1BIZ7, E1BCU5, Q9BE97, A4IFH3, F1N3Q1, E1BLS1, F1MX26, E1BPY4, E1BLF5, E1B815, F1MBF2, E1B6Z2, F1MFE5	1806	103	16802	1.53552	1	0.794888	78.1158
UP_SEQ_FEATURE	domain:RRM 2	5	0.258799	0.0834036	P09867, Q1LZD9, Q5EA36, Q3ZBP3, Q2T9U5	351	30	6267	2.97578	1	0.958619	75.81
UP_SEQ_FEATURE	domain:RRM 1	5	0.258799	0.0834036	P09867, Q1LZD9, Q5EA36, Q3ZBP3, Q2T9U5	351	30	6267	2.97578	1	0.958619	75.81
SMART	SM00145:PI3Ka	4	0.207039	0.0834722	F1MBU9, A6QPT0, E1BE66, O02811	1193	8	8740	3.66303	1	0.675749	71.4061
INTERPRO	IPR023152:Ras GTPase-activating protein, conserved site	4	0.207039	0.0834958	F1MBI8, P09851, E1BB77, Q28013	1806	10	16802	3.72137	1	0.793111	78.1972
INTERPRO	IPR018422:Cation/H+ exchanger, CPA1 family	4	0.207039	0.0834958	F1N798, E1BBL2, F1N5D7, G5E545	1806	10	16802	3.72137	1	0.793111	78.1972
INTERPRO	IPR002857:Zinc finger, CXXC-type	4	0.207039	0.0834958	E1BKN0, E1BLZ5, Q24K09, Q32LB3	1806	10	16802	3.72137	1	0.793111	78.1972
INTERPRO	IPR011547:Sulphate transporter	4	0.207039	0.0834958	A6QNW6, Q58DD2, E1BD54, E1BDR3	1806	10	16802	3.72137	1	0.793111	78.1972
INTERPRO	IPR024731:EGF domain, merozoite surface protein 1-like	4	0.207039	0.0834958	F1MYW1, F1MKV7, F1MZD0, E1BNJ1	1806	10	16802	3.72137	1	0.793111	78.1972
INTERPRO	IPR001627:Semaphorin/CD100 antigen	7	0.362319	0.0840136	F1N4C5, E1BDM5, E1BG65, G3X755, E1BNY3, E1BF41, A6QLV9	1806	29	16802	2.24566	1	0.79266	78.4113
GOTERM_CC_DIRECT	GO:0005925~focal adhesion	43	2.22567	0.084391	F1MDV3, F1MG84, F1MFD1, A7Z032, Q3MHZ4, P80311, E1BI26, Q05B78, F1N4L1, F1MDD9, F1MCK2, F1MY84, E1BE25, G3MYY6, P79134, F1MTI9, F1MM72, E1BKA3, F1MDH3, P23956, E1BHK2, Q0VCX4, E1BJ31, F1MB07, Q3MHM6, F1N6I9, A5D7B7, G3N2W8, F1MF78, E1B8H0, P00515, E1B748, E1BGJ0, E1BBI3, Q3ZCD0, F1MQT9, P00727, E1BMX5, F1MER7, A7MB57, F1MWK8, F1MQI1, A4IFK4	1648	318	15461	1.26859	1	0.825836	73.3627
INTERPRO	IPR001590:Peptidase M12B, ADAM/reprolysin	9	0.465839	0.0844993	F1MVP0, Q9TT93, F1N2M2, A5D7M5, F1MIY8, G1K1H0, E1BI72, F1MRA8, F1N303	1806	43	16802	1.94723	1	0.792087	78.6104
INTERPRO	IPR012317:Poly(ADP-ribose) polymerase, catalytic domain	5	0.258799	0.0845215	F1MCK0, E1BFH8, E1B8R5, A6QQZ9, E1BMY0	1806	16	16802	2.90732	1	0.78965	78.6195
INTERPRO	IPR021133:HEAT, type 2	5	0.258799	0.0845215	E1BQ15, F1MZT7, E1B7K5, A7E2Y6, F1MLY7	1806	16	16802	2.90732	1	0.78965	78.6195
INTERPRO	IPR002477:Peptidoglycan binding-like	5	0.258799	0.0845215	Q9GLE5, O77656, E1BK30, O18767, P52176	1806	16	16802	2.90732	1	0.78965	78.6195
INTERPRO	IPR000433:Zinc finger, ZZ-type	5	0.258799	0.0845215	A6QQS9, E1B782, F1MRT9, F1MD32, E1BNA9	1806	16	16802	2.90732	1	0.78965	78.6195
INTERPRO	IPR019594:Glutamate receptor, L-glutamate/glycine-binding	5	0.258799	0.0845215	F1MWI8, E1BK87, E1BKL6, F1MP46, F1MR40	1806	16	16802	2.90732	1	0.78965	78.6195
INTERPRO	IPR018488:Cyclic nucleotide-binding, conserved site	5	0.258799	0.0845215	E1BIS4, F1MW86, F1MZC9, Q00194, P00515	1806	16	16802	2.90732	1	0.78965	78.6195
UP_KEYWORDS	Activator	27	1.39752	0.0847664	A7Z017, E1BPQ1, B0JYK8, Q95LI3, Q2KJC1, F1MJM0, Q3MHZ4, Q08E31, Q24K09, Q08DJ8, P98201, Q8SQ19, F1MTI9, Q0VCT3, E1BPP7, Q28141, Q0VCX4, Q3MHH2, A0JND4, Q08E02, Q1LZD9, P27925, Q5E9B6, Q9BE97, A6QNU4, A6QQW0, F1N3D4	1884	186	17808	1.3721	1	0.7514	69.9057
GOTERM_MF_DIRECT	GO:0019531~oxalate transmembrane transporter activity	4	0.207039	0.0849511	A6QNW6, Q58DD2, E1BD54, E1BDR3	1418	10	13095	3.69394	1	0.794567	75.0702
GOTERM_MF_DIRECT	GO:0004143~diacylglycerol kinase activity	4	0.207039	0.0849511	E1BGA9, G5E5G8, E1B7K6, F1MCG9	1418	10	13095	3.69394	1	0.794567	75.0702
GOTERM_MF_DIRECT	GO:0015116~sulfate transmembrane transporter activity	4	0.207039	0.0849511	A6QNW6, Q58DD2, E1BD54, E1BDR3	1418	10	13095	3.69394	1	0.794567	75.0702
INTERPRO	IPR005828:General substrate transporter	8	0.414079	0.085177	F1N4B2, Q17QN9, F1MRS7, A6QPP1, Q29397, E1BML6, P58353, E1B8T2	1806	36	16802	2.06743	1	0.789786	78.8854
INTERPRO	IPR011042:Six-bladed beta-propeller, TolB-like	8	0.414079	0.085177	F1N6H1, E1BD59, E1BJS7, G5E5W9, E1BGX8, G3MYX8, E1BGJ0, E1BPZ1	1806	36	16802	2.06743	1	0.789786	78.8854
GOTERM_BP_DIRECT	GO:0022617~extracellular matrix disassembly	4	0.207039	0.0855188	O77656, F1MD77, F1MW39, O18767	1501	10	13824	3.68394	1	0.984337	80.719
GOTERM_BP_DIRECT	GO:0042953~lipoprotein transport	4	0.207039	0.0855188	P55156, E1BJK1, E1BNR0, F1MKV7	1501	10	13824	3.68394	1	0.984337	80.719
GOTERM_BP_DIRECT	GO:0060997~dendritic spine morphogenesis	4	0.207039	0.0855188	A0A024QYS0, F1N3R6, G3X7P4, G5E618	1501	10	13824	3.68394	1	0.984337	80.719
GOTERM_BP_DIRECT	GO:0034497~protein localization to pre-autophagosomal structure	4	0.207039	0.0855188	Q3T904, Q5E9Y2, D7GLD0, F1MQ92	1501	10	13824	3.68394	1	0.984337	80.719
GOTERM_BP_DIRECT	GO:0097067~cellular response to thyroid hormone stimulus	4	0.207039	0.0855188	E1B7Q6, E1BI59, A4IFA0, P25326	1501	10	13824	3.68394	1	0.984337	80.719
GOTERM_BP_DIRECT	GO:0016477~cell migration	19	0.983437	0.0857655	F1N0Y1, E1BEL4, A6QLB8, F1N084, F1MGR9, A7MBJ4, F1N3I6, F1MY84, G5E630, E1B8H0, F1MIX6, F1MD77, E1BIM8, F1MCX4, F1MX24, A4IF79, E1BCP6, F1MWK8, E1BND0	1501	118	13824	1.48294	1	0.983705	80.8145
UP_SEQ_FEATURE	metal ion-binding site:Calcium 1	4	0.207039	0.0861994	Q9GLE5, O77656, Q0VCY0, P52176	351	19	6267	3.75888	1	0.959444	76.9848
GOTERM_MF_DIRECT	GO:0005234~extracellular-glutamate-gated ion channel activity	5	0.258799	0.086308	F1MWI8, E1BK87, E1BKL6, F1MP46, F1MR40	1418	16	13095	2.88589	1	0.793763	75.6424
GOTERM_MF_DIRECT	GO:0001105~RNA polymerase II transcription coactivator activity	7	0.362319	0.0863157	G5E5C7, A6H796, E1BJG5, F1MPU1, Q8SQG8, A5PKK5, F1MGR3	1418	29	13095	2.2291	1	0.787675	75.6456
GOTERM_BP_DIRECT	GO:0051056~regulation of small GTPase mediated signal transduction	5	0.258799	0.0870107	A6QPH2, E1BP38, F1MCG4, E1BHF6, E1BNT2	1501	16	13824	2.87808	1	0.983883	81.29
GOTERM_BP_DIRECT	GO:0048286~lung alveolus development	7	0.362319	0.0872338	G5E5C7, A0JN98, G3N319, E1BP22, F1MBH4, G3MX46, G5E556	1501	29	13824	2.22307	1	0.983235	81.374
SMART	SM00293:PWWP	6	0.310559	0.0874732	E1B8Z0, F1MPD5, G3N0D9, F1MMY4, F1MY77, E1BPS1	1193	18	8740	2.44202	1	0.684134	73.1476
SMART	SM00046:DAGKc	5	0.258799	0.0894103	F1MXZ6, E1BGA9, G5E5G8, E1B7K6, F1MCG9	1193	13	8740	2.81772	1	0.683272	73.9549
SMART	SM00647:IBR	5	0.258799	0.0894103	F1MDC0, F1MH26, E1BM39, F1MEX6, A2VEA3	1193	13	8740	2.81772	1	0.683272	73.9549
UP_KEYWORDS	Collagen degradation	3	0.15528	0.0899603	Q9GLE5, O77656, P52176	1884	5	17808	5.67134	1	0.756833	72.1403
UP_KEYWORDS	Calcium channel	7	0.362319	0.0904156	P79100, Q8WN96, Q8WN95, F1MTK5, F1MR37, G3X7Z2, F1N1E0	1884	30	17808	2.20552	1	0.743264	72.3286
GOTERM_CC_DIRECT	GO:0005938~cell cortex	13	0.672878	0.0909871	Q3T0G8, E1B9K4, G3X7P3, E1BDQ4, F1MYQ7, P23206, Q8WN96, F6RHP0, E1BE11, Q27991, Q0VCX4, A5D7A3, E1BJQ7	1648	74	15461	1.64813	1	0.840714	76.1012
GOTERM_CC_DIRECT	GO:0043194~axon initial segment	3	0.15528	0.0911498	Q2HJF7, E1BLT3, M0QW12	1648	5	15461	5.629	1	0.832936	76.1653
GOTERM_CC_DIRECT	GO:0048476~Holliday junction resolvase complex	3	0.15528	0.0911498	A6QQB5, F1N7Q0, E1B8J2	1648	5	15461	5.629	1	0.832936	76.1653
GOTERM_CC_DIRECT	GO:0033256~I-kappaB/NF-kappaB complex	3	0.15528	0.0911498	A7Z034, A7MBB7, F1MBB0	1648	5	15461	5.629	1	0.832936	76.1653
GOTERM_CC_DIRECT	GO:0044300~cerebellar mossy fiber	3	0.15528	0.0911498	E1BPK8, E1BB77, A4FV52	1648	5	15461	5.629	1	0.832936	76.1653
GOTERM_CC_DIRECT	GO:0030056~hemidesmosome	3	0.15528	0.0911498	E1B864, A6QPB3, E1BKT3	1648	5	15461	5.629	1	0.832936	76.1653
INTERPRO	IPR000372:Leucine-rich repeat-containing N-terminal	10	0.517598	0.0913812	F1MLX5, E1BPK8, F1MBT2, F1N3H2, E1BC86, F1N7L3, Q0IIH3, G3N2N1, G3X6G8, F1MLJ7	1806	51	16802	1.8242	1	0.811023	81.252
GOTERM_BP_DIRECT	GO:0030335~positive regulation of cell migration	20	1.0352	0.0919958	E1BG65, E1BDM5, F1MTM9, E1BBV0, E1BE66, A4FV05, E1BNY3, A7YY44, F1MJE0, F1MFA8, F1MDD9, F1MF78, E1B8J6, G3X6G8, F1MXZ6, P02453, F1MEB7, E1BF41, F1MBH4, A6QLV9	1501	127	13824	1.45037	1	0.986028	83.0842
SMART	SM00560:LamGL	3	0.15528	0.0923062	F1N7Z6, E1BF00, E1BP05	1193	4	8740	5.49455	1	0.686456	75.1196
SMART	SM00573:HSA	3	0.15528	0.0923062	E1BC33, F1MLB1, A5PKK5	1193	4	8740	5.49455	1	0.686456	75.1196
SMART	SM00973:SM00973	3	0.15528	0.0923062	E1B7B1, F1MFR1, E1BH78	1193	4	8740	5.49455	1	0.686456	75.1196
INTERPRO	IPR024395:CLASP N-terminal domain	3	0.15528	0.0925259	E1BQ15, E1B7K5, E1BM83	1806	5	16802	5.58206	1	0.812758	81.6604
INTERPRO	IPR026854:Vacuolar protein sorting-associated protein 13A N-terminal domain	3	0.15528	0.0925259	E1BH30, E1BPX1, E1BIF6	1806	5	16802	5.58206	1	0.812758	81.6604
INTERPRO	IPR008366:Nuclear factor of activated T cells (NFAT)	3	0.15528	0.0925259	P98201, F1MGR9, F1MSU2	1806	5	16802	5.58206	1	0.812758	81.6604
INTERPRO	IPR006121:Heavy metal-associated domain, HMA	3	0.15528	0.0925259	Q3ZBE1, G3X6T7, F1MKI1	1806	5	16802	5.58206	1	0.812758	81.6604
INTERPRO	IPR000451:NF-kappa-B/Rel/Dorsal	3	0.15528	0.0925259	A7Z034, A7MBB7, F1MBB0	1806	5	16802	5.58206	1	0.812758	81.6604
INTERPRO	IPR008906:HAT dimerisation	3	0.15528	0.0925259	F1MFU7, G3N054, G3X7K6	1806	5	16802	5.58206	1	0.812758	81.6604
GOTERM_CC_DIRECT	GO:0012505~endomembrane system	14	0.724638	0.0930149	A5PK17, Q5E9Y2, E1BPA1, Q17QV2, F1MWY0, F1MS95, O97790, E1BFB4, Q32KR8, G3MXN3, F1N1F1, F1MG90, F1N405, F1MEY0	1648	82	15461	1.60175	1	0.831098	76.8887
INTERPRO	IPR013273:Peptidase M12B, ADAM-TS	6	0.310559	0.0931152	F1MVP0, E1BCW5, Q9TT93, F1N2M2, E1BI72, F1N303	1806	23	16802	2.42698	1	0.8125	81.8673
GOTERM_CC_DIRECT	GO:0005813~centrosome	43	2.22567	0.0937138	F1MB52, A6QPT6, Q3SX44, E1BK00, G3X687, F1MXF5, E1B7K5, G3MZK6, F1N3U6, E1B9R1, Q58DM2, E1BKI6, F1N469, E1BK86, G3X7P3, E1B8D0, E1BPZ9, A5D7F0, E1BNH9, E1BG09, Q28141, A6QNR2, Q0VCX4, F1MDF3, E3W9A2, E1BPP3, Q5EA95, E1BJB5, E1BC93, E1BK91, E1BLZ4, P00515, A5PKJ3, E1BCZ1, F1MMB2, E1BIV2, Q2KII9, E1BDX8, E1BFN3, F1N3F6, E1BJV8, P61420, E1B8X8, F1MM88	1648	321	15461	1.25674	1	0.825409	77.1545
GOTERM_MF_DIRECT	GO:0051864~histone demethylase activity (H3-K36 specific)	3	0.15528	0.0937154	A5PK74, F1MSU6, F1N542	1418	5	13095	5.5409	1	0.809579	78.5554
GOTERM_BP_DIRECT	GO:0010032~meiotic chromosome condensation	3	0.15528	0.0941745	F1MY41, F1MPS0, F1N3G4	1501	5	13824	5.52592	1	0.986765	83.8162
GOTERM_BP_DIRECT	GO:0003209~cardiac atrium morphogenesis	3	0.15528	0.0941745	F1MXE0, F1N7C3, E1BLB9	1501	5	13824	5.52592	1	0.986765	83.8162
GOTERM_BP_DIRECT	GO:0033153~T cell receptor V(D)J recombination	3	0.15528	0.0941745	E1BD25, F1MB07, E1BLB6	1501	5	13824	5.52592	1	0.986765	83.8162
GOTERM_BP_DIRECT	GO:0090267~positive regulation of mitotic cell cycle spindle assembly checkpoint	3	0.15528	0.0941745	E1B8D0, Q2KII9, Q08DH8	1501	5	13824	5.52592	1	0.986765	83.8162
GOTERM_BP_DIRECT	GO:0060351~cartilage development involved in endochondral bone morphogenesis	3	0.15528	0.0941745	P02453, P02459, E1BLB9	1501	5	13824	5.52592	1	0.986765	83.8162
GOTERM_BP_DIRECT	GO:0097070~ductus arteriosus closure	3	0.15528	0.0941745	G5E5C7, F1MBH4, Q0V8E7	1501	5	13824	5.52592	1	0.986765	83.8162
GOTERM_BP_DIRECT	GO:0010793~regulation of mRNA export from nucleus	3	0.15528	0.0941745	F1MMW4, E1BEB8, F1MXR8	1501	5	13824	5.52592	1	0.986765	83.8162
GOTERM_BP_DIRECT	GO:0042048~olfactory behavior	3	0.15528	0.0941745	E1BPM4, G5E618, F1MQK6	1501	5	13824	5.52592	1	0.986765	83.8162
GOTERM_BP_DIRECT	GO:0051438~regulation of ubiquitin-protein transferase activity	3	0.15528	0.0941745	F1MJP6, F1MVD5, A7MB67	1501	5	13824	5.52592	1	0.986765	83.8162
GOTERM_BP_DIRECT	GO:0006526~arginine biosynthetic process	3	0.15528	0.0941745	F1MVC0, F1ML89, Q3SZJ0	1501	5	13824	5.52592	1	0.986765	83.8162
GOTERM_BP_DIRECT	GO:0038061~NIK/NF-kappaB signaling	3	0.15528	0.0941745	A7Z034, A7MBB7, F1MBB0	1501	5	13824	5.52592	1	0.986765	83.8162
GOTERM_MF_DIRECT	GO:0008013~beta-catenin binding	6	0.310559	0.0953541	E1BPQ1, E1BG86, G3X7P3, F1N127, Q3MHM6, F1MP88	1418	23	13095	2.40909	1	0.809644	79.1542
INTERPRO	IPR000253:Forkhead-associated (FHA) domain	7	0.362319	0.0959378	E1BBP0, E1B7A1, F1MP14, E1BPD7, Q28147, F1MP58, G3X6H0	1806	30	16802	2.1708	1	0.819959	82.8284
UP_SEQ_FEATURE	DNA-binding region:Basic motif	6	0.310559	0.0966276	A7Z017, Q9BE97, Q8SQ19, A7YY73, P27925, A7YY54	351	44	6267	2.43473	1	0.970268	80.911
UP_KEYWORDS	Antiport	5	0.258799	0.0970451	F1N798, E1BBL2, F1N5D7, E1BDR3, G5E545	1884	17	17808	2.78007	1	0.754298	74.9412
GOTERM_BP_DIRECT	GO:0010923~negative regulation of phosphatase activity	9	0.465839	0.098262	A7Z026, F1N1P8, F1MNV8, E1BP74, E1BA43, Q3B7M7, E1BPZ9, E1BPS4, A0JNI9	1501	44	13824	1.88384	1	0.988546	85.1092
GOTERM_BP_DIRECT	GO:0071230~cellular response to amino acid stimulus	9	0.465839	0.098262	Q9GLE5, P02453, F1MJY9, F1MPD5, F1N2Y2, E1BI98, F1MSJ5, F1N264, Q24K09	1501	44	13824	1.88384	1	0.988546	85.1092
GOTERM_MF_DIRECT	GO:0001078~transcriptional repressor activity, RNA polymerase II core promoter proximal region sequence-specific binding	16	0.828157	0.0984906	E1BPQ1, E1BJ30, E1BI59, Q3B7M4, Q08E02, F1MGR9, F1N7E7, F1MPV5, Q08DJ8, E1BLY0, E1BLS1, F1MD32, F1MW46, A4FV57, E1BN65, F1MT17	1418	97	13095	1.52327	1	0.814786	80.2568
SMART	SM00015:IQ	11	0.569358	0.0985053	P06836, E1B933, E1BKW7, F1MG13, F1MM80, E1BP01, F1MMU9, F1MLR9, Q27991, A0JN59, F1MMQ6	1193	47	8740	1.71461	1	0.702492	77.452
SMART	SM00325:RhoGEF	13	0.672878	0.0985237	F1MQ44, F1MNV2, F1MQ30, E1BK14, F1MZA2, F1MBT5, Q29RM4, F1N657, F1N7C3, E1BIL8, F1MXJ6, F1MSU8, F1N1Q7	1193	59	8740	1.61422	1	0.694056	77.4586
GOTERM_CC_DIRECT	GO:0032993~protein-DNA complex	5	0.258799	0.0991136	F1N3F6, E1B9T7, A4FUY2, Q0VCX4, F1MQ59	1648	17	15461	2.75932	1	0.835334	79.1138
GOTERM_CC_DIRECT	GO:0030315~T-tubule	5	0.258799	0.0991136	Q2HJF7, E1BDQ4, F1MCH1, F1MCK2, M0QW12	1648	17	15461	2.75932	1	0.835334	79.1138
GOTERM_BP_DIRECT	GO:0000910~cytokinesis	7	0.362319	0.0995315	A5D977, F1MMB2, F1MNL8, F1MRT3, E1BLZ4, E1B8X8, Q29RT6	1501	30	13824	2.14897	1	0.98864	85.4905
GOTERM_BP_DIRECT	GO:0006606~protein import into nucleus	8	0.414079	0.0997475	F1MM55, E1BCV4, E1BG57, A5D7C4, A5PJZ5, E1BIX5, A5D7B3, A6QM02	1501	37	13824	1.99132	1	0.98816	85.5545
GOTERM_BP_DIRECT	GO:0032869~cellular response to insulin stimulus	8	0.414079	0.0997475	E1BPQ1, F1MNS5, F1MBN8, E1BPP7, F1MRA1, F1N032, E1BLB6, E1BPA1	1501	37	13824	1.99132	1	0.98816	85.5545

## Sheet: Functional annotaion_Lactation
Category	Term	Count	%	PValue	Genes	List Total	Pop Hits	Pop Total	Fold Enrichment	Bonferroni	Benjamini	FDR
UP_KEYWORDS	Coiled coil	317	20.3335	1.31992e-21	E1BAS3, E1BKE7, E1BKE1, F1MNV8, A6QNV7, E1BNV7, E1BP75, Q3B7N2, E1BJE7, F1N264, E1B9R5, F1MQ69, F1MSI9, F1MD64, E1BC48, G3X6L9, F1MBL6, F1MG71, F1MDH3, F1N1F0, A5PKI1, Q1LZH7, F1N0Y1, E1BJV1, G3MZJ5, G3MX98, F1MPV3, F1MF78, F1MPV5, F1MEG3, E1BJV9, P55203, E1B9B0, G5E556, F1MQI1, E1B7E3, E1BP93, F1N192, F1MXF5, F1MH50, F1N2W4, F1MPW8, G3MWW2, A6QLQ3, F1MQ85, A5D7N7, E1BJC6, F1MK91, F1MJ53, F1MK99,…	1470	2319	17808	1.65598	3.97297e-19	3.97297e-19	1.76471e-18
INTERPRO	IPR016024:Armadillo-type fold	75	4.81078	1.08093e-16	A0A0C5AVL2, E1BFA8, E1BKE1, E1BPU0, F1MME0, F1MKS6, P49951, A7MBJ5, F1MF68, A6QM02, A1A4I8, E1B847, F1MBL6, Q1RMS6, F1MV51, E1B883, E1B8S1, F1MJ73, E1BI79, E1BPI7, E1B718, E1B8C2, E1BHR5, F1MI29, E1BEI6, F1MZA7, E1BNY9, F1MDR7, E1BM39, E1BP38, E1BHD7, F1N0A8, E1BNR0, A7E2Y6, F1MUF1, E1B9B0, E1BKG4, E1BMG8, E1BH40, E1BK00, E1BM83, G3X6U0, E1BGC3, E1BMC4, F1N1C8, E1BNT2, E1BPS3, F1MLY7, F1MZK4, F1M…	1411	314	16802	2.84424	2.20823e-13	2.20823e-13	1.88738e-13
KEGG_PATHWAY	bta04512:ECM-receptor interaction	30	1.92431	1.63568e-13	A6QQT1, O18977, F1N0R5, Q29397, P80747, P80746, F1MJQ6, F1MTP1, E1BGA0, F1MDD5, P02453, F1N0T1, Q32S24, F1MBA3, P02459, F1MMN6, E1BNM2, F1MJ71, Q95116, F1MMT2, F1MZU6, E1B864, F1MD40, E1BDK6, Q28178, F1MYX9, Q7SIB2, P02465, F1MEG3, F1MER7	515	87	7550	5.05524	4.30099e-11	4.30099e-11	2.1414e-10
INTERPRO	IPR008160:Collagen triple helix repeat	30	1.92431	5.35714e-13	A6QP79, Q2KIX7, A7YY40, F1MND9, F1MJQ6, F1MTP1, F1MSJ7, Q8MHZ9, P02453, A5PJQ2, Q32S24, G3MXE4, P02459, F1MJ71, F1MZU6, F1MUC5, E1BPV7, A7E303, E1BIR7, E1BKJ9, F1MDC2, E1BCT7, A5PJL8, P23805, Q7SIB2, P02465, P23206, Q2KIV9, A6QPG8, F1N401	1411	75	16802	4.76315	1.06547e-09	5.32736e-10	9.20419e-10
INTERPRO	IPR000742:Epidermal growth factor-like domain	51	3.27133	6.61081e-13	A6QQT1, A6QP76, F1N570, F1N2Y8, O18977, F1MYW1, F1MPE9, P48733, G3X812, E1B949, A3KN33, Q95116, E1BPZ1, A7YY58, E1BGJ5, F1MXE0, Q28178, F1MYX9, E1BE11, E1BLD9, E1BNJ1, E1BGJ0, A2VE41, F1MEG3, F1MHH5, F1N740, F1MER7, A5PJW9, E1BMV3, E1BG77, P98133, F1MCT1, E1BPS6, E1BBM9, F1MJQ2, E1BMG7, Q06807, F1MN54, F1MMT2, G3N1H6, E1BEY2, A7E306, F1MKV7, F1MJF1, E1BDK6, E1BPT8, E1B9K4, F1N6H1, G1K1H0, F1MDE1,…	1411	197	16802	3.08275	1.31478e-09	4.38261e-10	1.13578e-09
GOTERM_MF_DIRECT	GO:0005524~ATP binding	168	10.7761	1.51975e-11	F1MWM0, A6QP73, F1N5B2, E1BPU0, E1BNV7, A7YW98, A1A4I4, E1BCS3, E1B9R5, E1BHE5, Q0IIG5, F1MEM4, F1N759, A7MBC5, F1MQJ7, G3X6L9, F1MBL6, F1MCE7, A6QNN6, E1BIE4, F1MFH7, F1N2J2, A2VDN5, A7Z027, E1BB52, E1BPM4, Q5E9Y9, A6QLV0, F1MNU7, F1MWE0, Q8WMV0, E1B715, F1N325, F1MLM2, E1B9Q4, Q17R14, F1MX40, F1MVF1, F1MC51, Q2T9X2, E1BGN7, E1BCE1, P55203, Q27991, G5E556, A6QPE8, E1BBM3, F1MIB7, E1BMP7, F1MPP7,…	1083	1224	13095	1.65961	1.28571e-08	1.28571e-08	2.34995e-08
INTERPRO	IPR001881:EGF-like calcium-binding	34	2.18089	6.02906e-11	A6QQT1, F1N570, F1N2Y8, F1MYW1, P98133, F1MPE9, E1BPS6, P48733, G3X812, E1B949, F1MN54, Q95116, A3KN33, A7YY58, E1BGJ5, F1MXE0, E1BEY2, A7E306, F1MKV7, F1MJF1, Q28178, E1BE11, E1BPT8, E1BNJ1, F1MFI4, E1BGJ0, E1B9K4, F1N6H1, A2VE41, F1MVS9, F1MHH5, F1MER7, F1MNH3, E1BMV3	1411	111	16802	3.64745	1.19918e-07	2.99795e-08	1.03592e-07
INTERPRO	IPR013032:EGF-like, conserved site	42	2.69403	7.51477e-10	A6QQT1, E1BG77, A6QP76, F1N570, F1N2Y8, O18977, F1MYW1, P98133, F1MPE9, E1BPS6, E1BBM9, E1BMG7, P48733, G3X812, E1B949, Q06807, Q95116, A3KN33, G3N1H6, A7YY58, E1B864, F1MXE0, E1BGJ5, E1BEY2, A7E306, F1MKV7, F1MJF1, Q28178, E1BE11, E1BLD9, E1BPT8, E1BNJ1, E1BGJ0, E1B9K4, F1N6H1, A2VE41, F1MVS9, F1MHH5, F1MER7, A5PJW9, F1MNH3, E1BMV3	1411	173	16802	2.89093	1.49469e-06	2.98938e-07	1.2912e-06
SMART	SM00181:EGF	46	2.95061	1.19033e-09	A6QQT1, A6QP76, F1N570, F1N2Y8, O18977, F1MYW1, P98133, F1MPE9, F1MCT1, E1BPS6, E1BMG7, P48733, G3X812, E1B949, Q06807, F1MN54, F1MMT2, Q95116, A3KN33, E1BPZ1, A7YY58, G3N1H6, F1MXE0, E1BGJ5, E1BEY2, A7E306, F1MKV7, E1BDK6, F1MJF1, F1MYX9, Q28178, E1BE11, E1BPT8, E1BNJ1, E1BGJ0, E1B9K4, F1N6H1, A2VE41, F1MEG3, F1MHH5, F1N740, F1MER7, F1MDE1, A5PJW9, F1MNH3, E1BMV3	985	156	8740	2.61643	5.85642e-07	5.85642e-07	1.71024e-06
UP_KEYWORDS	EGF-like domain	35	2.24503	3.17629e-09	A6QQT1, F1N570, F1N2Y8, P98133, F1MPE9, E1BPS6, E1BMG7, P48733, G3X812, E1B949, Q06807, F1MN54, Q95116, A3KN33, E1BPZ1, A7YY58, F1MXE0, E1BGJ5, E1BEY2, A7E306, F1MKV7, F1MJF1, Q28178, E1BE11, E1BPT8, F1MFI4, E1BGJ0, E1B9K4, F1N6H1, A2VE41, F1MVS9, G1K1H0, A5PJW9, F1MDE1, F1MNH3	1470	136	17808	3.11765	9.56062e-07	4.78031e-07	4.24663e-06
INTERPRO	IPR001791:Laminin G domain	20	1.28287	5.18189e-09	A6QQT1, F1MUC5, Q28178, F1MYX9, F1MJQ2, F1MY84, F1MND9, F1MJQ6, F1MTP1, Q32S24, F1MEG3, G3MXE4, E1B949, F1MHH5, Q95116, A3KN33, F1MMT2, F1MER7, F1N401, E1BP05	1411	49	16802	4.86035	1.03067e-05	1.71779e-06	8.90359e-06
INTERPRO	IPR003961:Fibronectin, type III	42	2.69403	1.41125e-08	Q1KZG2, O18977, E1BFE2, F1MXS0, F1MPN0, E1B8X1, F1MTF9, E1B755, F1MY47, F1N199, E1BPU9, F1MNG8, Q06807, F1MGX7, F1MN54, F1MXH7, E1BPC9, A3KN33, E1BP05, G5E5S6, E1BIE4, E1BPZ1, F1MFH7, E1BJ31, E1BE71, E1B864, F1N4K6, F1MGK5, G3MZJ5, G3MZU6, F1N008, E1BDP0, G3N022, F1MKR1, E1BJZ1, F1N279, A7MB72, E1BD36, A5D7S4, G3MY74, F1N401, A6H7I1	1411	190	16802	2.63227	2.80693e-05	4.00995e-06	2.42482e-05
KEGG_PATHWAY	bta04510:Focal adhesion	39	2.5016	1.42114e-08	A6QQT1, O18977, F1N0R5, Q3B7N2, P80747, P80746, F1MJQ6, F1N5N3, F1MTP1, E1BGA0, F1MDD5, E1BE25, P02453, F1MIX6, F1N0T1, Q32S24, F1N759, F1MQJ7, E1BM23, F1MBA3, P02459, F1MMN6, E1BNM2, F1MJ71, F1MDH3, F1MMT2, Q95116, F1MZU6, E1B864, F1MY55, F1MD40, E1BDK6, F1MYX9, Q28178, Q7SIB2, P02465, F1MEG3, F1N768, F1MQI1	515	208	7550	2.74879	3.73758e-06	1.86879e-06	1.86091e-05
INTERPRO	IPR018097:EGF-like calcium-binding, conserved site	26	1.66774	2.66594e-08	A6QQT1, F1N570, F1N2Y8, P98133, F1MPE9, E1BPS6, P48733, G3X812, E1B949, F1MN54, A7YY58, E1BEY2, E1BGJ5, F1MXE0, A7E306, F1MKV7, F1MJF1, E1BE11, E1BPT8, F1MFI4, E1BGJ0, E1B9K4, F1N6H1, A2VE41, F1MVS9, F1MNH3	1411	87	16802	3.55867	5.30241e-05	6.62816e-06	4.58065e-05
SMART	SM00179:EGF_CA	34	2.18089	7.1926e-06	Q2KIT5, E1BDN7, F1MYW1, Q28019, F1MPE9, E1BPS6, P48733, E1BGE0, G3X812, G3X6N5, E1B949, F1MN54, F1MLJ7, E1BL59, A4FV93, F1MXE0, F1MKV7, F1MC84, F1MSI2, E1BE11, E1BNJ1, G3N1F4, F1N2V0, E1BGJ0, F1N444, E1B9K4, F1N6H1, F1MHH5, F1N6Y9, E1BJ11, Q5E9P5, F1MER7, F1MZD0, F1MNH3	1193	111	8740	2.24402	0.00352535	0.00176423	0.0103307
INTERPRO	IPR011993:Pleckstrin homology-like domain	64	4.1052	1.49715e-07	F1MXS1, E1BKE7, E1BGX4, F1MPJ6, G3X6D0, E1BIQ2, E1BAW4, A6QR57, G3X783, F1MHG5, O97902, F1N657, F1MQJ7, F1MW59, F1MJV1, F1MDH3, E1BGX7, F1MYE9, E1BKY4, E1BB02, F1MQ30, E1BPM7, F1N6I9, Q2KJ24, A5PK34, F1N371, E1BJR7, E1B7L9, F1MUS9, E1BE90, F1MTH3, E1BJV9, F1MSU8, F1MQI1, G3N3E1, F1N214, E1BEZ8, E1BIH4, F1MH50, Q1KZG5, F1MJE0, F1MD97, Q32PJ7, A6QLU3, E1BPS3, E1BDQ0, F1N5N3, G3N2B1, A6QP95, F1MG90,…	1411	382	16802	1.99504	0.000297739	3.30865e-05	0.000257242
INTERPRO	IPR003593:AAA+ ATPase domain	31	1.98845	3.70228e-07	F1MWM0, Q2KJ94, F1MRL3, E1B8F6, P62194, E1B9R5, A7YSY2, G3MYQ9, F1N5R7, E1B8Q4, P35071, A4FUE2, A5D7P7, A6QNN6, F1MSP8, Q58DC8, A2VDN5, F1N724, E1BKP0, E1BKR6, F1MUC1, F1MWE0, F1MK55, F1MC51, F1MHF3, E1BNL1, E1BCG1, E1BLT5, E1BDX8, E1BCE1, G5E556	1411	132	16802	2.79654	0.000736112	7.36356e-05	0.000636129
GOTERM_MF_DIRECT	GO:0044212~transcription regulatory region DNA binding	28	1.79602	6.07052e-07	E1BEL3, E1B9V4, E1BFC1, F1MME0, Q2KIA0, F1MGF7, E1B842, E1BCL9, Q9BDI3, E1BE01, A2VDW9, D0VZF8, Q05B92, E1BN44, A0A0A8JC39, F1MNS7, E1BCA0, E1BI11, F1MNB5, A6QLF6, F1MI25, G3X8E4, F1MDR1, Q9GMA3, F1MW46, F1MSS8, E1B9X1, E1B8T3	1083	116	13095	2.91862	0.000513434	0.00025675	0.000938666
INTERPRO	IPR009030:Insulin-like growth factor binding protein, N-terminal	27	1.73188	8.17957e-07	P98133, F1MPE9, F1MCT1, P48733, G3X812, F1MW38, E1B949, F1MMT2, E1BIE4, F1MFH7, A7YY58, E1BJ31, E1BGJ5, E1BEY2, A7E306, F1MKV7, F1MJF1, E1BE11, E1BPT8, F1MKR1, P01267, E1BGJ0, E1B9K4, F1N6H1, A2VE41, F1N740, F1MNH3	1411	109	16802	2.94966	0.00162559	0.000147891	0.00140542
SMART	SM00060:FN3	37	2.37332	8.45771e-07	Q1KZG2, O18977, E1BFE2, F1MXS0, F1MPN0, E1B8X1, E1B755, F1N199, E1BPU9, F1MNG8, Q06807, F1MGX7, F1MN54, F1MXH7, E1BPC9, A3KN33, E1BP05, E1BIE4, G5E5S6, E1BPZ1, F1MFH7, E1BJ31, E1BE71, E1B864, F1N4K6, F1MGK5, G3MZJ5, G3MZU6, F1N008, F1MKR1, G3N022, E1BJZ1, F1N279, E1BD36, A5D7S4, F1N401, A6H7I1	985	138	8740	2.37902	0.000416033	0.000138697	0.00121518
INTERPRO	IPR011989:Armadillo-like helical	39	2.5016	8.52608e-07	E1BKG4, E1BPU0, F1MKS6, E1BM83, F1N1C8, A7MBJ5, E1BNT2, F1MF68, E1BPS3, F1MLY7, E1B7Q7, F1MZK6, F1MBL6, E1BFB4, E1BG09, E1B8Q9, E1BFV0, Q1RMS6, F1MV51, E1BKC4, E1BGU2, E1BI79, E1BPI7, E1BJF6, E1B8W3, F1N3G4, E1BHR5, F1MI29, E1BKJ5, Q58DG7, E1BLB6, Q32PG1, E1BM39, F1MDR7, O46382, E1BHD7, A7E2Y6, F1MUF1, E1BCK1	1411	196	16802	2.36942	0.0016944	0.00014131	0.00146495
INTERPRO	IPR013320:Concanavalin A-like lectin/glucanase, subgroup	37	2.37332	1.71261e-06	A6QQT1, E1BL26, F1N7Z6, F1MJQ2, F1MY84, F1MND9, E1BPS3, E1BPU9, F1MJQ6, F1MFJ4, F1MTP1, A3KMV8, A6QLU6, Q32S24, G3MXE4, E1B949, F1MMT2, Q95116, A3KN33, E1BP05, G5E5S6, E1BNQ9, F1MUC5, G3MWR7, F1MYX9, Q28178, F1MXX8, E1BJZ1, Q0VCG9, F1N0A6, F1MEG3, F1MHH5, F1MZX3, F1MER7, F1N401, F1MNH3, F1MNS0	1411	186	16802	2.36877	0.00340058	0.000261995	0.00294258
INTERPRO	IPR020683:Ankyrin repeat-containing domain	40	2.56575	1.88961e-06	F1MB71, E1BLC3, E1BIQ2, E1BPU0, F1MPE9, A7YY60, F1MI56, F1MFJ2, E1BHC8, O97902, G3X812, F1MMV0, Q08DV6, E1BMQ7, E1BFD6, E1BB02, F1MBJ0, Q1LZH7, F1MUQ4, E1BBN5, F1MNU7, E1BAT5, A6QLV0, F1MSK0, G3X6E6, E1BPT8, E1BMF4, F1MDC0, A3KMY6, E1BNC9, G3X8E4, E1BHD7, F1N0U2, G5E618, F1MNU9, F1N768, E1BJI4, E1BIJ3, E1BCE6, F1N545	1411	210	16802	2.26817	0.00375139	0.000268424	0.00324671
KEGG_PATHWAY	bta02010:ABC transporters	14	0.898012	2.3686e-06	F1MWM0, E1BKP0, E1BKR6, F1N3K2, F1MRL3, F1MUC1, E1BNL1, F1MC51, E1BCG1, G3MYQ9, E1BLT5, P35071, A5D7P7, G5E556	515	42	7550	4.88673	0.000622748	0.000207626	0.00310152
UP_KEYWORDS	ATP-binding	109	6.99166	3.21844e-06	A6QP73, E1BNV7, A7YW98, A1A4I4, E1BCS3, Q0IIG5, F1MEM4, F1N759, A7MBC5, F1MBL6, F1MCE7, E1BIE4, F1MFH7, A2VDN5, E1BB52, Q5E9Y9, F1MNU7, F1MWE0, Q8WMV0, E1B715, Q17R14, F1MVF1, F1MC51, Q2T9X2, E1BGN7, Q27991, A6QPE8, G5E556, E1BMP7, F1MPP7, E1BL06, P34933, P62194, F1MAZ8, A7MB19, Q06807, F1MZG0, E1BFB4, F1MJ53, E1BP01, F1MW32, E1BKP0, Q75WB5, F1MXG8, F1MUC1, E1BKP7, F1MKR1, G3N022, F1MBQ8, E1BLB6,…	1470	848	17808	1.55714	0.000968282	0.000322865	0.0043029
INTERPRO	IPR018159:Spectrin/alpha-actinin	12	0.769724	3.30642e-06	F1N6H4, E1BJV1, F1MLS2, E1BKT9, E1BLT3, F1MKE9, E1B9N6, F1N2K8, F1MF78, Q3B7N2, E1BFB0, F1MMQ8	1411	26	16802	5.49594	0.0065549	0.000438336	0.00568098
UP_KEYWORDS	Collagen	18	1.15459	3.38397e-06	F1MUC5, A6QP79, Q2KIX7, A7E303, E1BIR7, Q8MHZ9, P02453, P23805, A5PJL8, Q7SIB2, Q32S24, P02465, P02459, P23206, F1MJ71, Q2KIV9, F1N401, F1MZU6	1470	59	17808	3.69588	0.00101806	0.000254612	0.00452421
INTERPRO	IPR000152:EGF-type aspartate/asparagine hydroxylation site	23	1.4753	3.65807e-06	F1N570, A7YY58, F1N2Y8, E1BEY2, E1BGJ5, F1MXE0, P98133, A7E306, F1MPE9, F1MKV7, F1MJF1, E1BE11, E1BPS6, E1BPT8, P48733, E1BGJ0, G3X812, E1B9K4, F1N6H1, A2VE41, E1B949, F1MN54, F1MNH3	1411	90	16802	3.04312	0.00724952	0.000454642	0.00628517
INTERPRO	IPR026823:Complement Clr-like EGF domain	11	0.705581	4.23925e-06	E1B9K4, A7YY58, F1N6H1, A2VE41, E1BGJ5, A7E306, P98133, F1MJF1, Q28178, E1BE11, E1BGJ0	1411	22	16802	5.95393	0.00839645	0.000495871	0.0072837
INTERPRO	IPR002110:Ankyrin repeat	38	2.43746	4.8029e-06	F1MB71, E1BLC3, E1BIQ2, F1MPE9, A7YY60, F1MI56, F1MFJ2, E1BHC8, O97902, G3X812, F1MMV0, Q08DV6, E1BFD6, E1BB02, F1MBJ0, Q1LZH7, F1MUQ4, E1BBN5, F1MNU7, E1BAT5, A6QLV0, F1MSK0, G3X6E6, E1BPT8, E1BMF4, F1MDC0, A3KMY6, E1BNC9, G3X8E4, E1BHD7, F1N0U2, G5E618, F1MNU9, F1N768, E1BJI4, E1BIJ3, E1BCE6, F1N545	1411	202	16802	2.24009	0.00950751	0.000530581	0.00825209
GOTERM_MF_DIRECT	GO:0000978~RNA polymerase II core promoter proximal region sequence-specific DNA binding	46	2.95061	5.6277e-06	E1BEL3, F1N215, A6QNT0, F1MR87, E1BME7, E1BGZ6, E1BNL6, Q2KIA0, A6QLQ3, F1MDK3, F1MAZ9, A6H727, E1BLY0, F1MCY1, F1ML06, E1BCL9, E1BJ03, E1BPP7, A6H7J1, F1MV76, A6QPK5, Q05B92, E1BBZ8, E1BJ30, E1BPM4, E1BIT4, F1N2B6, E1BJD1, E1BAD7, F1MLM2, E1BJR9, E1BFW7, E1BKK0, F1MU46, Q0VBZ5, A5D7C5, E1BMR0, Q0VCS4, Q08DI0, G5E5H1, E1BPY4, F1MW46, F1N3F6, E1BH37, D2KFG0, F1CYZ1	1083	273	13095	2.03738	0.00474973	0.00158576	0.00870163
INTERPRO	IPR023413:Green fluorescent protein-like	8	0.513149	7.04654e-06	F1N570, E1B9K4, F1MYW1, A7E306, E1BE11, E1BNJ1, P48733, F1MNH3	1411	11	16802	8.66027	0.0139179	0.000737392	0.0121068
INTERPRO	IPR015943:WD40/YVTN repeat-like-containing domain	50	3.20718	7.48367e-06	Q32KS2, F1MB52, E1BFA8, E1BPU0, A3KMV1, F1MH31, F1N439, A5D7H2, E1BH25, F1N4C5, F1MK51, E1BKR4, E1B860, F1MTS5, E1BCT7, E1BFR4, F1MNF4, E1BE13, E1BE15, F1N3C8, G3X6I6, F1N1R8, F1MWB8, E1BJG3, F1N0C0, E1BC63, E1BPS3, E1BCH1, A4IFF2, F1MM55, Q9XSC3, F1MJ53, Q58DC2, E1BJ01, F1MG90, F1MLZ5, E1BG65, F1MKR0, G3X755, E1BL55, E1BKF9, F1MTQ0, F1MG59, E1B8R7, E1BNC2, Q9TTK4, E1B7F6, F1N406, F1MNS0, A6H7I2	1411	305	16802	1.95211	0.0147748	0.000743977	0.0128578
KEGG_PATHWAY	bta04974:Protein digestion and absorption	19	1.21873	1.02232e-05	F1MUC5, Q95JC7, F1MD40, A7YY40, F1MND9, F1MU00, F1MJQ6, F1MDC2, F1MTP1, P02453, Q7SIB2, Q32S24, P02465, G3MXE4, P02459, P23206, F1MJ71, F1N401, F1MZU6	515	84	7550	3.316	0.0026851	0.000671952	0.0133859
INTERPRO	IPR019786:Zinc finger, PHD-type, conserved site	17	1.09044	1.17384e-05	E1B7A1, F1MLY5, A6QLA0, F1MFD2, F1MUR2, F1MP49, F1N6Y2, F1MPV5, F1MY77, F1MYV2, F1MNE1, F1MD96, F1MS13, E1BN25, F1N3F6, F1N544, F1MLK1	1411	57	16802	3.55147	0.0230775	0.00111119	0.0201672
INTERPRO	IPR027417:P-loop containing nucleoside triphosphate hydrolase	105	6.73509	1.24744e-05	F1MWM0, F1MUD3, A6QP73, E1BP73, E1BPU0, E1BNV7, F1MCM7, E1B9R5, F1MSI9, F1MEM4, Q3SYU2, A6QNN6, A2VDN5, A7Z027, E1BPM4, P49410, F1MNU7, E1BED7, F1MWE0, E1B715, G3X6E6, E1B9Q4, F1MLM2, Q2T9Y1, Q17R14, F1MX40, F1MC51, F1MNF4, E1BCE1, Q27991, A6QPE8, G5E556, A0JN92, E1BP93, E1BMP7, A5PJV4, E1BL06, F1MQ85, P62194, A7MB19, F1N5R7, E1B8Q4, Q08DF2, F1MZG0, F1MJ53, E1BP01, F1MSP8, E1BKP0, F1MUC1, E1BLB4,…	1411	821	16802	1.52293	0.0245065	0.00112717	0.0214316
GOTERM_MF_DIRECT	GO:0003682~chromatin binding	49	3.14304	1.32407e-05	E1B9V4, E1BIF0, F1N616, F1MME0, F1MGR3, A1A4I4, F1N264, Q32S26, A6H727, Q9BDI3, E1BNH8, A6QPK5, F1N1F0, E1BGW5, E1B9Q4, E1BPY4, G5E5H1, D2KFG0, E1BH37, F1MMU3, E1B6Z5, F1N215, Q2KJ94, E1BMC0, Q2KIA0, F1MI56, F1MQ85, Q0VCT9, E1BNK2, F1MCY1, F1MS13, E1BKC4, E1BBH8, E1BBZ8, E1BNS3, Q58DC8, E1B7A1, A7YW40, A6QP26, F1N2B6, F1N3G4, F1MP49, F1MSG4, E1BLK1, F1MY77, Q3SZ20, F1MM81, Q9GMA3, F1MNH3	1083	308	13095	1.92363	0.0111392	0.00279651	0.0204719
INTERPRO	IPR024743:Dynein heavy chain, coiled coil stalk	8	0.513149	1.56816e-05	F1N724, F1N1K6, F1N5R7, E1BDX8, F1MK55, E1BLB4, F1MSP8, E1B9R5	1411	12	16802	7.93858	0.0307095	0.00135521	0.0269409
INTERPRO	IPR004273:Dynein heavy chain domain	8	0.513149	1.56816e-05	F1N724, F1N1K6, F1N5R7, E1BDX8, F1MK55, E1BLB4, F1MSP8, E1B9R5	1411	12	16802	7.93858	0.0307095	0.00135521	0.0269409
INTERPRO	IPR013602:Dynein heavy chain, domain-2	8	0.513149	1.56816e-05	F1N724, F1N1K6, F1N5R7, E1BDX8, F1MK55, E1BLB4, F1MSP8, E1B9R5	1411	12	16802	7.93858	0.0307095	0.00135521	0.0269409
INTERPRO	IPR024317:Dynein heavy chain, P-loop containing D4 domain	8	0.513149	1.56816e-05	F1N724, F1N1K6, F1N5R7, E1BDX8, F1MK55, E1BLB4, F1MSP8, E1B9R5	1411	12	16802	7.93858	0.0307095	0.00135521	0.0269409
GOTERM_CC_DIRECT	GO:0016020~membrane	112	7.18409	2.05824e-05	F1MH73, E1B876, A0JNC0, F1MLE1, F1N136, F1MNV8, E1BNV7, E1B991, A7YW98, A7MBJ3, Q08E34, A7MBJ5, Q1LZ97, A7MB37, A6QM02, O97902, A7MBC5, E1BC48, G3X6L9, F1MEM8, A6QNN6, F1MLF3, F1MHU9, F1MWE0, Q8WMV0, G3MX98, F1MPV3, F1MLM2, F1MVF1, A6QPE8, F1MMQ8, F1MH70, E1BMG8, E1BDC9, E1BC64, E1BNT2, P62194, E1BNK0, E1B8Q4, Q08DF2, E1BHT5, F1MKR0, E1BAF6, F1MYV8, F1N3G4, P56701, F1MBQ8, A1L552, E1BLB6, E1B748,…	1297	902	15461	1.48016	0.0125379	0.0125379	0.0304834
INTERPRO	IPR019787:Zinc finger, PHD-finger	18	1.15459	2.19519e-05	E1B7A1, F1MLY5, A6QLA0, E1BKN0, F1MFD2, F1MUR2, F1MP49, F1N6Y2, E1BLZ5, F1MY77, F1MYV2, F1MNE1, F1MD96, F1MS13, E1BN25, F1N3F6, F1N544, F1MLK1	1411	66	16802	3.2476	0.0427232	0.00181763	0.0377113
INTERPRO	IPR014009:PIK-related kinase	6	0.384862	2.30801e-05	F1MBL6, E1BFB4, E1BKJ5, E1BEI6, E1BLB6, F1MLY7	1411	6	16802	11.9079	0.0448691	0.00183459	0.0396491
INTERPRO	IPR003152:PIK-related kinase, FATC	6	0.384862	2.30801e-05	F1MBL6, E1BFB4, E1BKJ5, E1BEI6, E1BLB6, F1MLY7	1411	6	16802	11.9079	0.0448691	0.00183459	0.0396491
UP_KEYWORDS	ANK repeat	35	2.24503	2.37091e-05	F1MB71, E1BLC3, E1BIQ2, F1MPE9, A7YY60, F1MI56, F1MFJ2, E1BHC8, O97902, G3X812, F1MMV0, Q08DV6, E1BMQ7, E1BFD6, F1MBJ0, Q1LZH7, F1MUQ4, E1BBN5, E1BAT5, A6QLV0, E1BPT8, E1BMF4, F1MDC0, A3KMY6, E1BNC9, G3X8E4, E1BHD7, F1N0U2, G5E618, F1MNU9, F1N768, E1BJI4, E1BIJ3, E1BCE6, F1N545	1470	195	17808	2.17436	0.00711112	0.00142629	0.0316939
GOTERM_MF_DIRECT	GO:0005201~extracellular matrix structural constituent	13	0.833868	2.52009e-05	F1N2Y8, F1MTV3, P98133, F1MJQ6, F1MTP1, P02453, Q7SIB2, Q32S24, P02465, P02459, F1MJ71, F1MZU6, E1BMV3	1083	37	13095	4.24833	0.0210946	0.00425497	0.0389605
INTERPRO	IPR011011:Zinc finger, FYVE/PHD-type	25	1.60359	2.8435e-05	F1MLY5, F1MFD2, F1MUR2, F1MQ85, E1BPS3, F1MD29, F1MNE1, F1MS13, E1BN25, F1N415, E1B7A1, E1BKN0, F1MP49, F1N6Y2, E1BBR6, E1BLZ5, E1BLZ4, F1MY77, F1N2K7, F1MYV2, F1MD96, E1BMN9, F1N3F6, F1MLK1, F1N544	1411	116	16802	2.56635	0.0549884	0.00217295	0.0488463
INTERPRO	IPR002049:EGF-like, laminin	12	0.769724	4.77816e-05	A6QP76, G3N1H6, F1N0T1, F1MEG3, A7MB18, F1MHH5, E1BDK6, F1MYX9, F1MER7, E1BPS6, F1MMT2, E1BP05	1411	33	16802	4.33013	0.0906633	0.00351381	0.0820672
GOTERM_CC_DIRECT	GO:0005581~collagen trimer	16	1.0263	4.95744e-05	F1MUC5, A6QP79, Q2KIX7, A7E303, E1BIR7, Q8MHZ9, P02453, P23805, A5PJL8, Q7SIB2, Q32S24, P02465, P23206, Q2KIV9, F1MZU6, F1N401	1297	57	15461	3.34613	0.0299327	0.0150801	0.0734072
INTERPRO	IPR001965:Zinc finger, PHD-type	19	1.21873	5.21143e-05	E1B7A1, F1MLY5, E1BKN0, F1MFD2, F1MUR2, F1MP49, F1N6Y2, E1BLZ5, F1MY77, F1MYV2, F1MNE1, F1MD96, F1MS13, E1BN25, F1N3F6, E1B9X1, E1B8T3, F1N544, F1MLK1	1411	77	16802	2.9383	0.0984664	0.00369523	0.0895057
SMART	SM00210:TSPN	10	0.641437	5.29526e-05	A6QQT1, Q32S24, F1MUC5, G3MXE4, Q28178, Q95116, F1N401, F1MND9, F1MJQ6, F1MTP1	985	18	8740	4.9295	0.0257169	0.00649218	0.0760541
GOTERM_CC_DIRECT	GO:0005654~nucleoplasm	150	9.62155	5.39399e-05	E1BIF0, E1BKE7, F1MPE9, A7YW98, E1BJ63, E1BNL6, A7MBJ5, F1MVD0, G3X746, E1BIU7, A7MB37, F1N264, A6H727, F1MEM4, F1MNE1, A7MBC5, E1BC48, Q2TBX0, A6QNN6, E1B885, E1BFD5, F1N0Y1, E1BPM6, E1BE55, E1BDD9, E1BAT5, F1N0Y9, E1BJD1, A6QQ84, E1B9Q4, F1MLM2, A8KC64, Q0VBZ5, Q2T9X2, Q0QEX9, F1N4Z5, D2KFG0, F1N2I0, F1CYZ1, F1MUF1, E1B8X8, E1BCE6, E1B7E3, E1BKG4, E1BEZ8, F1N2W4, E1BL06, E1BPS7, E1BC64, F1MAZ9,…	1297	1310	15461	1.36495	0.0325253	0.0109615	0.0798691
SMART	SM00150:SPEC	12	0.769724	5.42474e-05	F1N6H4, E1BJV1, F1MLS2, E1BKT9, E1BLT3, F1MKE9, E1B9N6, F1N2K8, F1MF78, Q3B7N2, E1BFB0, F1MMQ8	985	26	8740	4.09528	0.0263374	0.00532387	0.0779131
INTERPRO	IPR002035:von Willebrand factor, type A	21	1.34702	6.20176e-05	E1B864, F1N0R5, E1BPR4, E1BD12, Q3SZN2, F1MD40, F1MV07, F1MHZ1, E1BE11, E1BPV7, P80747, E1B9L7, E1B9K4, G3MXE4, F1MBA3, F1MMN6, P54281, A5D7R6, F1N401, F1MNH3, E1BMV3	1411	92	16802	2.7181	0.116052	0.00424465	0.106506
GOTERM_MF_DIRECT	GO:0044822~poly(A) RNA binding	102	6.54266	6.52164e-05	F1N5B5, A6QP73, F1MPN0, E1B8X1, A7MB37, F1MEM4, F1MBL6, Q3SYU2, A6QP09, E1B7W1, A5D7D3, E1BHU1, A6QNN6, F1MI03, E1BB52, E1BE55, A8E651, P49410, F1MHU9, F1MNU7, F1N0Y9, F1MLM2, Q2T9Y1, E1BIV7, E1BCT7, Q2T9X2, F1N647, Q08E27, P82925, F1MCK2, A4IFF2, E1AXU0, E1BKW5, F1N2H2, E1BFV0, A6QLA0, E1BAF6, Q1LZD9, F1MBQ8, E1BGY0, E1BLB6, F1MQG6, E1BCZ2, F1MEA7, A6QLI2, A5D7E4, E1BMX2, F1MPG6, F1MTX3, E1BKQ6,…	1083	840	13095	1.46824	0.0536804	0.00915366	0.100795
INTERPRO	IPR017871:ABC transporter, conserved site	14	0.898012	7.10099e-05	E1BKP0, E1BKR6, F1N3K2, F1MRL3, F1MUC1, E1BNL1, F1MC51, E1BCG1, G3MYQ9, E1BLT5, P35071, A4FUE2, A5D7P7, G5E556	1411	46	16802	3.62413	0.131722	0.00469706	0.12194
INTERPRO	IPR002017:Spectrin repeat	9	0.577293	7.85084e-05	F1N6H4, E1BJV1, F1MLS2, E1BLT3, F1MKE9, F1MF78, Q3B7N2, E1BFB0, F1MMQ8	1411	19	16802	5.64057	0.144577	0.00502473	0.134809
INTERPRO	IPR003439:ABC transporter-like	15	0.962155	8.52741e-05	F1MWM0, E1BKP0, E1BKR6, F1N3K2, F1MRL3, F1MUC1, E1BNL1, F1MC51, E1BCG1, G3MYQ9, E1BLT5, P35071, A4FUE2, A5D7P7, G5E556	1411	53	16802	3.37015	0.156012	0.00528652	0.146418
INTERPRO	IPR017986:WD40-repeat-containing domain	43	2.75818	9.06556e-05	Q32KS2, F1MB52, E1BFA8, F1MWB8, E1BJG3, F1N0C0, E1BPU0, A3KMV1, E1BC63, E1BPS3, E1BCH1, F1N439, A4IFF2, A5D7H2, Q9XSC3, F1MJ53, Q58DC2, E1BJ01, E1BH25, F1MG90, F1MK51, F1MLZ5, E1BHT5, F1MKR0, E1BL55, E1BKF9, A0JN52, E1BKR4, E1B860, F1MTQ0, E1BCT7, F1MTS5, F1MG59, F1MNF4, E1B8R7, E1BNC2, F1N3C8, Q9TTK4, F1N1R8, G3X6I6, F1N406, F1MNS0, A6H7I2	1411	273	16802	1.8756	0.164999	0.0054494	0.155651
SMART	SM01343:SM01343	6	0.384862	9.75131e-05	F1MBL6, E1BFB4, E1BKJ5, E1BEI6, E1BLB6, F1MLY7	985	6	8740	8.8731	0.046846	0.00796458	0.140013
GOTERM_MF_DIRECT	GO:0016887~ATPase activity	22	1.41116	0.000100269	F1MYA8, F1N724, E1BBY6, A7Z027, F1N3K2, E1BNV7, G3X690, F1MPV3, E1B715, F1MK55, E1BLB4, F1MLM2, E1B9Q4, E1B9R5, E1BNK2, F1N6H4, F1N5R7, A4FUE2, F1MJ53, E1BDX8, A6QPE8, F1MSP8	1083	104	13095	2.5578	0.0813329	0.0120456	0.15493
INTERPRO	IPR026983:Dynein heavy chain	7	0.449006	0.000110317	F1N724, F1N1K6, F1N5R7, F1MK55, E1BLB4, F1MSP8, E1B9R5	1411	11	16802	7.57773	0.197025	0.0064331	0.189379
SMART	SM00382:AAA	31	1.98845	0.000116136	F1MWM0, Q2KJ94, F1MRL3, E1B8F6, P62194, E1B9R5, A7YSY2, G3MYQ9, F1N5R7, E1B8Q4, P35071, A4FUE2, A5D7P7, A6QNN6, F1MSP8, Q58DC8, A2VDN5, F1N724, E1BKP0, E1BKR6, F1MUC1, F1MWE0, F1MK55, F1MC51, F1MHF3, E1BNL1, E1BCG1, E1BLT5, E1BDX8, E1BCE1, G5E556	985	132	8740	2.08383	0.0555402	0.00812994	0.166732
GOTERM_MF_DIRECT	GO:0003777~microtubule motor activity	15	0.962155	0.000136399	F1N724, F1N1K6, E1BBY6, G3X690, E1B715, F1MK55, E1BLB4, E1B9R5, F1N5R7, F1MJ53, F1MBQ0, E1BDX8, A6H7H2, A6QPE8, F1MSP8	1083	56	13095	3.23877	0.108991	0.0143216	0.210702
INTERPRO	IPR001849:Pleckstrin homology domain	38	2.43746	0.000143845	F1MPJ6, E1BIQ2, F1MH50, Q1KZG5, E1BAW4, F1MJE0, A6QR57, F1MD97, A6QLU3, O97902, F1MHG5, F1N657, F1MW59, F1MJV1, E1BKY4, E1BB02, A6QP95, A6QPU2, E1BH60, G3N3K9, F1MQ30, E1BPM7, F1N6I9, A5PK34, E1B7L9, F1MUS9, A3KMY6, E1BE90, F1MF11, F1MTH3, A7MB72, A4IFK0, F1MLS2, E1BLT3, F1MKE9, F1MLS3, E1BJV9, F1MSU8	1411	235	16802	1.92553	0.248834	0.00814176	0.246869
INTERPRO	IPR009091:Regulator of chromosome condensation 1/beta-lactamase-inhibitor protein II	9	0.577293	0.000181504	F1MMV0, E1BH40, F1N0C0, E1B782, F1N0L2, F1MCW5, F1MDF3, F1MNS0, F1MM88	1411	21	16802	5.10337	0.303051	0.00997886	0.311404
INTERPRO	IPR013098:Immunoglobulin I-set	24	1.53945	0.0001839	E1BGL8, E1BE71, F1N4K6, F1MXS0, G3MZU6, A7Z067, E1BE11, E1BDP0, E1BKP7, G3N022, E1BAU3, F1N199, F1MPU4, F1MK80, F1N279, E1B9K4, F1MZV0, F1N759, A7MB72, F1MLS2, F1MGX7, E1BPC9, F1MER7, A6H7I1	1411	122	16802	2.34253	0.306367	0.00983809	0.31551
INTERPRO	IPR013594:Dynein heavy chain, domain-1	6	0.384862	0.000186518	F1N724, E1BDX8, F1MK55, E1BLB4, F1MSP8, E1B9R5	1411	8	16802	8.9309	0.309969	0.00971615	0.319995
INTERPRO	IPR000330:SNF2-related	11	0.705581	0.00019411	F1N734, A7Z027, E1BPM4, E1BC33, F1MLB1, F1N3F6, F1MQ85, F1MLM2, F1MGF2, F1N544, A6QQR4	1411	32	16802	4.09333	0.320313	0.00985174	0.333
UP_SEQ_FEATURE	region of interest:Triple-helical region	5	0.320718	0.000202701	P02453, Q32S24, P23206, F1MJ71, F1MZU6	270	8	6267	14.5069	0.182169	0.182169	0.319455
GOTERM_CC_DIRECT	GO:0005604~basement membrane	14	0.898012	0.000220775	F1MUC5, A7E306, E1BE11, E1BPV7, E1B9K4, F1N0T1, Q7SIB2, A7MB18, P02459, F1MJ71, Q95116, A3KN33, F1MZU6, E1BP05	1297	51	15461	3.27232	0.12659	0.0332715	0.326527
INTERPRO	IPR003151:PIK-related kinase, FAT	5	0.320718	0.000230467	E1BFB4, E1BKJ5, E1BEI6, E1BLB6, F1MLY7	1411	5	16802	11.9079	0.367738	0.0113958	0.395253
INTERPRO	IPR001007:von Willebrand factor, type C	11	0.705581	0.000257732	P02453, F1MW38, F1MTV3, F1N0R5, E1BEY2, P02459, F1N740, F2FB42, Q28178, Q95116, G5E5A7, F2FB40	1411	33	16802	3.96929	0.40112	0.0124269	0.441916
UP_KEYWORDS	Hydroxylation	13	0.833868	0.000262097	Q8MHZ9, P02453, P23805, Q7SIB2, Q32S24, P02465, F1MVS9, P02459, P23206, F1MJ71, Q2KIV9, F1N401, F1MZU6	1470	46	17808	3.4236	0.0758691	0.0130642	0.349851
INTERPRO	IPR000403:Phosphatidylinositol 3-/4-kinase, catalytic domain	8	0.513149	0.000264375	F1MBU9, F1MBL6, E1BFB4, E1BKJ5, O02811, E1BEI6, E1BLB6, F1MLY7	1411	17	16802	5.6037	0.408983	0.0124436	0.453282
UP_SEQ_FEATURE	domain:Fibrillar collagen NC1	4	0.256575	0.000302991	P02453, Q32S24, P02465, P02459	270	4	6267	23.2111	0.259636	0.139556	0.477158
UP_SEQ_FEATURE	propeptide:C-terminal propeptide	4	0.256575	0.000302991	P02453, Q32S24, P02465, P02459	270	4	6267	23.2111	0.259636	0.139556	0.477158
KEGG_PATHWAY	bta04151:PI3K-Akt signaling pathway	42	2.69403	0.000322368	A6QQT1, O18977, F1N0R5, E1BNX4, E1BNT2, P80747, A1A4I4, F1MJQ6, P80746, F1MTP1, E1BGA0, F1MDD5, P02453, F1N0T1, Q32S24, F1N759, F1MQJ7, G3N2B1, P29473, Q06807, P02459, F1MBA3, E1BNM2, F1MMN6, F1MJ71, E1BFB4, F1MMT2, Q95116, F1MZU6, E1BJ31, E1B864, F1MD40, A7Z067, E1BDK6, F1MYX9, Q28178, F1MFK1, Q7SIB2, A5D7M0, P02465, F1MEG3, P01317	515	347	7550	1.77443	0.0813008	0.0168163	0.421304
GOTERM_MF_DIRECT	GO:0042626~ATPase activity, coupled to transmembrane movement of substances	13	0.833868	0.000328134	F1MWM0, E1BKP0, E1BKR6, F1N3K2, F1MRL3, F1MUC1, F1MC51, E1BNL1, E1BCG1, G3MYQ9, E1BLT5, A5D7P7, G5E556	1083	47	13095	3.34443	0.242436	0.0303787	0.506183
GOTERM_BP_DIRECT	GO:0007507~heart development	22	1.41116	0.000348748	F1N724, Q32KS2, F1N215, F1MB52, A6QNT0, E1B8W3, E1BC86, A4IF73, Q2KIA0, A6QLU3, E1BEI6, E1B860, E1BLB6, F1N279, E1AXU0, G3X8E4, F1MCY1, Q0VCF8, A4FUD0, Q06807, F1N5T3, F1MF93	1190	109	13824	2.34468	0.667408	0.667408	0.629645
SMART	SM00180:EGF_Lam	12	0.769724	0.000349508	A6QP76, G3N1H6, F1N0T1, F1MEG3, A7MB18, F1MHH5, E1BDK6, F1MYX9, F1MER7, E1BPS6, F1MMT2, E1BP05	985	31	8740	3.43475	0.158011	0.0212691	0.500994
SMART	SM00146:PI3Kc	8	0.513149	0.000376845	F1MBU9, F1MBL6, E1BFB4, E1BKJ5, O02811, E1BEI6, E1BLB6, F1MLY7	985	14	8740	5.07034	0.169264	0.0203939	0.54008
INTERPRO	IPR000885:Fibrillar collagen, C-terminal	6	0.384862	0.000390599	P02453, Q32S24, P02465, P02459, F1MJQ6, F1MTP1	1411	9	16802	7.93858	0.540241	0.0179087	0.669016
GOTERM_MF_DIRECT	GO:0005509~calcium ion binding	71	4.5542	0.000496096	F1N570, A6QQT1, F1N2Y8, F1MYW1, E1BKE7, F1MPE9, E1BD40, A7MBJ3, Q3B7N2, P48733, A2VDQ2, Q1LZ97, G3X812, E1B9E4, E1B949, A3KN33, Q95116, E1BKY4, E1BFB0, A7YY58, E1BGJ5, F1MXE0, Q28178, E1BJD0, E1BE11, F1MTK6, E1BNJ1, E1BGJ0, A6QQP7, A5D9E1, M5FK30, F1N0A6, A2VE41, F1MVS9, F1MHH5, F1MZX3, F1MER7, F1MMQ8, Q2HJ89, E1BMV3, P98133, F1MXQ5, E1BPS6, E1BAU4, G3X6Y5, F1N5R7, Q3SZP7, F1MN54, F1N416, A6H742,…	1083	571	13095	1.50349	0.342822	0.0411111	0.764355
KEGG_PATHWAY	bta05146:Amoebiasis	19	1.21873	0.000511179	P19754, F1ML75, E1BDK6, F1MYX9, F2FB40, Q3B7N2, F1MJQ6, F1MTP1, F1MDD5, P02453, F1N0T1, Q7SIB2, Q32S24, P02465, F1MEG3, P02459, F1MJ71, F1MMT2, F1MZU6	515	112	7550	2.487	0.125825	0.0221631	0.6673
INTERPRO	IPR001487:Bromodomain	11	0.705581	0.000561138	F1MTQ0, E1BNS3, Q32S26, F1MNE1, F1MD96, E1BNH8, F1MP49, E1BN25, A6QLF6, F1MMU3, F1MY77	1411	36	16802	3.63851	0.672549	0.0250539	0.95979
INTERPRO	IPR000242:Protein-tyrosine phosphatase, receptor/non-receptor type	11	0.705581	0.000561138	Q1KZG2, E1BFE2, E1BEZ8, F1MGK5, E1BIH4, E1B755, F1N008, F1N6W1, E1BPU9, E1BIU7, E1BJR7	1411	36	16802	3.63851	0.672549	0.0250539	0.95979
UP_SEQ_FEATURE	domain:EGF-like 3	5	0.320718	0.000567873	Q06807, P98133, Q28178, A3KN33, Q95116	270	10	6267	11.6056	0.430781	0.171245	0.892552
INTERPRO	IPR008211:Laminin, N-terminal	7	0.449006	0.000574996	G3N1H6, F1N0T1, F1MEG3, A7MB18, E1BDK6, F1MMT2, E1BP05	1411	14	16802	5.95393	0.681457	0.0251017	0.983383
INTERPRO	IPR018936:Phosphatidylinositol 3/4-kinase, conserved site	7	0.449006	0.000574996	F1MBU9, F1MBL6, E1BFB4, O02811, E1BEI6, E1BLB6, F1MLY7	1411	14	16802	5.95393	0.681457	0.0251017	0.983383
INTERPRO	IPR001452:Src homology-3 domain	32	2.0526	0.000577685	F1MB71, E1BMG8, E1BB46, G3X783, O97902, F1MSI9, F1MIX6, F1N657, F1MJ96, Q0P5B1, E1BKY4, E1BFB0, A6QPU2, F1MEC0, G3N0J9, A7YWJ7, G3MZJ5, F1MXG8, Q0VC16, F1N7Q8, F1MQI3, F1MLS2, F1MG13, G5E618, E1BG80, F1MX23, Q08DK5, E1BIL8, A7MB08, A7MB57, E1BIJ3, F1MMQ8	1411	199	16802	1.91483	0.683157	0.0246763	0.987961
INTERPRO	IPR001589:Actinin-type, actin-binding, conserved site	8	0.513149	0.000589747	E1BE25, F1N6H4, E1BJV1, E1BLT3, F1MKE9, F1MF78, Q3B7N2, A6H742	1411	19	16802	5.01384	0.690672	0.0246559	1.00849
INTERPRO	IPR024731:EGF domain, merozoite surface protein 1-like	6	0.384862	0.000727211	F1MYW1, A7E306, F1MKV7, F1MJF1, Q95116, E1BNJ1	1411	10	16802	7.14472	0.764713	0.029695	1.24218
INTERPRO	IPR013783:Immunoglobulin-like fold	74	4.74663	0.000766634	G3XCF6, F1N2Y8, O18977, E1BFE2, F1MXS0, F1MPN0, E1B8X1, E1BC44, F1MTF9, F1MY47, E1BPU9, F1MPU4, F1N759, E1BPC9, F1MXH7, A3KN33, E1BFT2, E1BIE4, E1BPZ1, F1MFH7, E1BHM4, F1MLF3, F1N4C5, E1BJ31, E1B864, F1MGK5, A7Z067, E1BE11, E1BDP0, E1BJZ1, F1N279, F1MBB7, E1BFR4, E1BE15, A5D7S4, F1MER7, Q1KZG2, E1BH40, A6QNT0, E1B755, F1MAZ9, F1N199, E1BAU3, E1BE25, E1BK86, F1MNG8, Q06807, F1MN54, F1MGX7, G5E5S6,…	1411	599	16802	1.47109	0.78247	0.0306514	1.3091
GOTERM_BP_DIRECT	GO:0033601~positive regulation of mammary gland epithelial cell proliferation	6	0.384862	0.000814081	E1BIQ2, E1BBV0, F1MUR2, A6H7H0, P01317, E1BN44	1190	10	13824	6.97008	0.923486	0.723389	1.46395
INTERPRO	IPR001478:PDZ domain	24	1.53945	0.000825804	E1B8X2, F1N0Y1, F1MEC0, E1BKQ6, G3N3K9, E1BIH4, F1N4C8, G3X6D0, E1BHF6, E1BKK6, E1BC64, F1MDL2, F1MCK2, E1BM96, F1MXV4, E1BJR7, A5D7L3, F1MHG5, F1MSI9, F1MMW6, F1MTH3, G5E618, I6L1R7, F1N415	1411	135	16802	2.11695	0.80664	0.0323299	1.40947
INTERPRO	IPR003598:Immunoglobulin subtype 2	30	1.92431	0.00084277	F1MXS0, E1BC44, F1MY47, E1BAU3, F1N199, F1MPU4, F1N759, F1MNG8, F1MGX7, E1BPC9, E1BHM4, F1MLF3, E1BE71, E1BGL8, F1N4K6, G3N1H1, G3MZU6, F1MYJ5, A7Z067, E1BE11, E1BKP7, E1BDP0, G3N022, E1B9K4, F1N279, F1MZV0, A7MB72, F1MLS2, F1MER7, A6H7I1	1411	186	16802	1.92062	0.813062	0.0323472	1.43823
GOTERM_CC_DIRECT	GO:0005737~cytoplasm	306	19.628	0.000844113	F1MLE1, E1BB46, A7YW98, F1MD70, A7MBJ5, Q1LZ97, F1N264, O97902, E1BC48, E1B782, G3X6L9, F1MBL6, F1MDH3, Q3SYU2, Q2TBX0, E1BND0, F1N1F1, F1MJ73, Q1LZH7, E1BFD5, Q5W9D7, E1BPM6, E1BJV1, E1BP61, E1BAT5, F1MNU7, E1B8H2, F1MWE0, E1BC52, Q58CU3, F1N279, F1N4Z5, F1CYZ1, E1BCE6, E1BP91, F1MR87, E1BGZ6, E1BC64, E1BC63, F1MAZ9, F1N281, E1BC69, G5E5X0, Q3MI00, E1BFV0, E1BNS3, A6QLA0, E1BB33, G3X7K6, E1BBV0,…	1297	3109	15461	1.17327	0.404087	0.0983528	1.24309
GOTERM_MF_DIRECT	GO:0005096~GTPase activator activity	29	1.86017	0.00106917	A6QP75, E1B876, E1BMG8, F1MCG4, E1BIQ2, Q2TA45, E1BPU0, E1BNV7, E1BHF6, E1BNT2, F1N450, O97902, F1MHG5, F1N439, F1MIX6, F1MJZ7, E1BB02, G3MXN3, G3N3K9, F1MZ74, F1MPV3, F1MXV4, F1N7Q8, A3KMY6, E1BP38, F1MTH3, A7MB08, Q5EA00, A6H7I2	1083	183	13095	1.91613	0.59546	0.0789797	1.64052
GOTERM_MF_DIRECT	GO:0000976~transcription regulatory region sequence-specific DNA binding	9	0.577293	0.00113181	A5D7E9, F1MM81, Q0VCF8, E1BDD9, Q1LZD9, F1MSG4, E1BLK1, F1N685, F1N0J9	1083	27	13095	4.03047	0.61636	0.0767337	1.73583
INTERPRO	IPR001715:Calponin homology domain	15	0.962155	0.00114544	G5E5A1, F1MUD3, E1BJV1, E1BC91, F1MF78, Q3B7N2, G3MWR8, E1BE25, F1MQA8, F1MHF3, F1N6H4, F1MKE9, E1BLT3, A6H7H0, A6H742	1411	67	16802	2.66594	0.897672	0.042891	1.94997
UP_SEQ_FEATURE	zinc finger region:C2H2-type 2	9	0.577293	0.0011596	Q2TA17, A0JNJ4, Q3B7N9, Q5E9U0, A4IFJ6, A2VDW9, A6H7J1, A6QPM3, G3N351	270	50	6267	4.178	0.683678	0.25005	1.81466
UP_SEQ_FEATURE	short sequence motif:Cell attachment site	7	0.449006	0.0012191	Q8MHZ9, P02453, P23805, F1MBA3, Q28178, Q95116, F1MZU6	270	29	6267	5.60268	0.701828	0.214957	1.90693
INTERPRO	IPR001025:Bromo adjacent homology (BAH) domain	6	0.384862	0.00124129	Q58DC8, F1MM81, E1BNH8, F1MSG4, E1BLK1, F1MGR3	1411	11	16802	6.4952	0.915454	0.0455428	2.11151
UP_KEYWORDS	Nucleotide-binding	122	7.82553	0.00127021	E1BHU9, A6QP73, E1BP73, F1N5B2, E1BNV7, A7YW98, E1BP75, A1A4I4, E1BCS3, Q0IIG5, F1MEM4, F1N759, A7MBC5, F1MBL6, Q3SYU2, F1MCE7, E1BIE4, F1MFH7, A2VDN5, E1BB52, P49410, Q5E9Y9, F1MNU7, F1MWE0, Q8WMV0, E1B715, E1B9Q4, Q17R14, F1MVF1, F1MC51, Q2T9X2, E1BGN7, Q27991, P55203, A6QPE8, G5E556, E1BMP7, F1MPP7, E1BL06, P34933, P62194, F1MAZ8, A7MB19, Q06807, F1MZG0, E1BFB4, F1MJ53, E1BP01, F1MW32, E1BKP0,…	1470	1124	17808	1.3149	0.317899	0.0531872	1.68497
INTERPRO	IPR011990:Tetratricopeptide-like helical	30	1.92431	0.00140035	E1BP93, F1MXS1, F1MF87, F1N4V2, Q08E34, P49951, G3X746, E1BNT3, E1BLC6, F1MLY7, A7MB60, A6H7H2, F1MV76, F1N2F6, E1B885, A5PJN6, G3N266, F1N4M5, F1MSK0, A7E3S8, G3X6E6, E1BKJ5, E1B860, E1BIV7, E1BCZ3, F1MG59, A6H739, F1N4X0, E1BJI0, A6QQR4	1411	192	16802	1.8606	0.93841	0.0503063	2.37903
INTERPRO	IPR004939:Anaphase-promoting complex, subunit 10/DOC domain	5	0.320718	0.00140534	E1BM39, E1BH40, E1BK00, E1B782, E1BNA9	1411	7	16802	8.50562	0.939019	0.0495865	2.38742
SMART	SM00282:LamG	12	0.769724	0.00146197	Q32S24, F1MUC5, E1B949, F1MEG3, F1MHH5, F1MYX9, F1MJQ2, F1MER7, F1MMT2, A3KN33, F1MY84, E1BP05	985	36	8740	2.9577	0.513158	0.0694519	2.08012
GOTERM_BP_DIRECT	GO:0035904~aorta development	7	0.449006	0.00150439	F1N4C5, A7YY58, F1N6H1, E1BJ30, Q4GZT3, Q27991, E1BH37	1190	16	13824	5.08235	0.991361	0.794808	2.68943
SMART	SM00038:COLFI	6	0.384862	0.00152865	P02453, Q32S24, P02465, P02459, F1MJQ6, F1MTP1	985	9	8740	5.9154	0.528893	0.066136	2.17402
INTERPRO	IPR002909:Cell surface receptor IPT/TIG	9	0.577293	0.00163134	G3XCF6, F1N4C5, E1BK86, A6QNT0, E1BFR4, G3X755, E1BFT2, F1MAZ9, E1B7F6	1411	28	16802	3.82753	0.961124	0.0563397	2.7663
UP_KEYWORDS	Laminin EGF-like domain	7	0.449006	0.00174133	G3N1H6, F1MEG3, F1MHH5, E1BDK6, F1MYX9, F1MER7, E1BPS6	1470	17	17808	4.98824	0.408207	0.063471	2.30322
SMART	SM00249:PHD	19	1.21873	0.00184486	E1B7A1, F1MLY5, E1BKN0, F1MFD2, F1MUR2, F1MP49, F1N6Y2, E1BLZ5, F1MY77, F1MYV2, F1MNE1, F1MD96, F1MS13, E1BN25, F1N3F6, E1B9X1, E1B8T3, F1N544, F1MLK1	985	77	8740	2.18947	0.596876	0.0729143	2.61822
GOTERM_MF_DIRECT	GO:0001105~RNA polymerase II transcription coactivator activity	9	0.577293	0.00188657	Q0VCF8, E1BGX4, E1BDD9, Q9BDI3, E1BGZ6, F1MPU1, D2KFG0, Q0VCT9, F1MGR3	1083	29	13095	3.75251	0.797608	0.115638	2.8777
KEGG_PATHWAY	bta04360:Axon guidance	19	1.21873	0.00189318	G3N1H6, E1BJ31, E1BE71, E1BG65, F1MY55, A6QNT0, G3X755, F1MXG8, E1BC64, F1MKR1, F1N199, F1N279, E1BFR4, A7MB18, F1MQH2, E1BE15, E1B7F6, E1BIE4, F1MFH7	515	125	7550	2.22835	0.392485	0.0687215	2.45084
INTERPRO	IPR011009:Protein kinase-like domain	62	3.97691	0.00193798	G3X788, E1BPU0, F1N5B2, Q2KIP2, F1MKK7, A1A4I4, E1BP17, F1N791, F1N759, F1MQJ7, E1B847, F1MBL6, F1MCE7, E1BIE4, F1MFH7, F1N2J2, E1BJ31, E1BB52, Q0P5I2, E1BQ34, A6QLV0, Q3SZK6, A7Z067, Q8WMV0, E1BEI6, F1MFK1, E1B7L9, F1MVF1, E1B9F9, F1N0U2, F1N378, P55203, A7MB57, E1BH35, E1BBM3, F1MIB7, Q29RI0, E1BC64, F1MLY7, F1MAZ8, E1BC69, F1MBU9, Q06807, F1MVZ2, E1BFB4, E1BP01, O02811, A6QP95, F1MXG8, F1MYV9,…	1411	500	16802	1.47658	0.978898	0.0654507	3.27816
INTERPRO	IPR011704:ATPase, dynein-related, AAA domain	6	0.384862	0.00198153	F1N724, E1BDX8, F1MK55, E1BLB4, F1MSP8, E1B9R5	1411	12	16802	5.95393	0.980652	0.0657585	3.35065
GOTERM_BP_DIRECT	GO:0007018~microtubule-based movement	13	0.833868	0.00210054	F1N1K6, E1BBY6, F1MBQ0, F1MJ53, G3X690, E1BDX8, E1B715, F1MCP5, F1MK55, A6QPE8, E1BLB4, F1MSP8, E1B9R5	1190	55	13824	2.74579	0.998688	0.809685	3.73616
INTERPRO	IPR001650:Helicase, C-terminal	19	1.21873	0.00217511	F1N734, A7Z027, F1MGC9, A5D786, A6QP73, E1BPM4, E1BMC0, F1MNU7, F1MLB1, F1MQ85, F1MLM2, F1MGF2, F1MBQ8, F1MX40, F1MEM4, E1BC33, F1N3F6, F1N544, A6QQR4	1411	103	16802	2.1966	0.986846	0.0707772	3.67224
INTERPRO	IPR022102:Holliday junction regulator protein family C-terminal	4	0.256575	0.00221112	E1BB33, Q2KIA0, D2KFG0, F1CYZ1	1411	4	16802	11.9079	0.987757	0.0707521	3.73196
INTERPRO	IPR001101:Plectin repeat	4	0.256575	0.00221112	F1N6H4, E1BKT9, E1B9N6, F1N2K8	1411	4	16802	11.9079	0.987757	0.0707521	3.73196
INTERPRO	IPR000219:Dbl homology (DH) domain	14	0.898012	0.00222112	E1BLA5, A6QP75, E1BKE7, F1MQ30, F1MPJ6, F1MJ96, F1N657, A7MB72, F1MTH3, F1MLS2, E1BIL8, E1BKY4, F1MSU8, F1MDF3	1411	64	16802	2.60485	0.987998	0.0699375	3.74853
GOTERM_BP_DIRECT	GO:0035023~regulation of Rho protein signal transduction	15	0.962155	0.00223825	E1BLA5, A6QP75, E1BKE7, F1MQ30, F1MPJ6, E1BNV7, F1MJ96, F1N657, A7MB72, F1MTH3, F1MLS2, E1BIL8, E1BKY4, F1MSU8, F1MDF3	1190	70	13824	2.48932	0.999151	0.756921	3.97643
INTERPRO	IPR001680:WD40 repeat	35	2.24503	0.00250084	Q32KS2, F1MWB8, E1BJG3, E1BC63, E1BPS3, F1MH31, E1BCH1, F1N439, A4IFF2, A5D7H2, Q9XSC3, F1MJ53, Q58DC2, E1BJ01, E1BH25, F1MG90, F1MK51, F1MLZ5, E1BL55, E1BKF9, E1BKR4, E1B860, F1MTQ0, E1BCT7, F1MTS5, F1MG59, F1MNF4, E1BNC2, F1N3C8, Q9TTK4, F1N1R8, G3X6I6, F1N406, F1MNS0, A6H7I2	1411	245	16802	1.70112	0.993129	0.0771872	4.21111
INTERPRO	IPR014001:Helicase, superfamily 1/2, ATP-binding domain	19	1.21873	0.00270672	F1N734, A7Z027, F1MGC9, A5D786, A6QP73, E1BPM4, E1BMC0, F1MNU7, F1MLB1, F1MQ85, F1MLM2, F1MGF2, F1MBQ8, F1MX40, F1MEM4, E1BC33, F1N3F6, F1N544, A6QQR4	1411	105	16802	2.15476	0.995442	0.0820118	4.55025
SMART	SM00136:LamNT	7	0.449006	0.00270918	G3N1H6, F1N0T1, F1MEG3, A7MB18, E1BDK6, F1MMT2, E1BP05	985	14	8740	4.43655	0.73677	0.0975764	3.82278
GOTERM_BP_DIRECT	GO:0048333~mesodermal cell differentiation	5	0.320718	0.00287356	E1B864, F1MBA3, G3N346, E1BNM2, F1MV76	1190	8	13824	7.2605	0.999886	0.779899	5.0776
UP_SEQ_FEATURE	domain:EGF-like 1	6	0.384862	0.00304656	Q06807, P98133, Q28178, A3KN33, Q95116, P48733	270	24	6267	5.80278	0.95153	0.396173	4.70177
INTERPRO	IPR019734:Tetratricopeptide repeat	21	1.34702	0.00308705	F1MXS1, E1BP93, G3N266, F1MF87, F1N4V2, F1MSK0, A7E3S8, Q08E34, G3X6E6, G3X746, E1BLC6, E1BIV7, A6H739, A7MB60, G3N346, F1N4X0, E1BJI0, A6H7H2, F1MV76, F1N2F6, E1B885	1411	123	16802	2.03305	0.997866	0.0916159	5.17377
GOTERM_BP_DIRECT	GO:0048596~embryonic camera-type eye morphogenesis	6	0.384862	0.0033394	F1N694, E1BLY0, E1BQ34, E1BLZ5, Q0VCT9, F1N264	1190	13	13824	5.3616	0.999974	0.778673	5.87743
INTERPRO	IPR013026:Tetratricopeptide repeat-containing domain	20	1.28287	0.00355816	F1MXS1, E1BP93, G3N266, F1MF87, F1N4V2, F1MSK0, A7E3S8, Q08E34, G3X6E6, G3X746, E1BLC6, E1BIV7, A6H739, A7MB60, F1N4X0, E1BJI0, A6H7H2, F1MV76, F1N2F6, E1B885	1411	116	16802	2.05308	0.999166	0.103336	5.94079
GOTERM_BP_DIRECT	GO:0007155~cell adhesion	27	1.73188	0.00356131	A6QQT1, F1N2Y8, O18977, F1MYW1, F1N0R5, Q3SX26, F1MXS0, A2VE02, P80747, F1MBA3, F1MJ71, E1BPC9, Q95116, F1MMT2, F1MZU6, E1BIE4, F1N4K6, F1MUC5, Q28178, F1MYX9, E1BNJ1, F1MEG3, G1K1H0, F1MD13, Q27991, F1N401, F1MQI1	1190	173	13824	1.81303	0.999987	0.755232	6.2562
INTERPRO	IPR000408:Regulator of chromosome condensation, RCC1	7	0.449006	0.0036053	F1MMV0, E1BH40, E1B782, F1MCW5, F1MDF3, F1MNS0, F1MM88	1411	19	16802	4.38711	0.999241	0.103132	6.01723
GOTERM_MF_DIRECT	GO:0005089~Rho guanyl-nucleotide exchange factor activity	13	0.833868	0.00373952	E1BLA5, A6QP75, E1BKE7, F1MQ30, F1MPJ6, F1MJ96, F1N657, A7MB72, F1MTH3, F1MLS2, E1BIL8, E1BKY4, F1MSU8	1083	61	13095	2.57686	0.957978	0.202599	5.62856
SMART	SM00248:ANK	36	2.30917	0.00397588	F1MB71, E1BLC3, E1BIQ2, F1MPE9, A7YY60, F1MI56, F1MFJ2, E1BHC8, O97902, G3X812, F1MMV0, Q08DV6, E1BFD6, F1MBJ0, Q1LZH7, F1MUQ4, E1BBN5, E1BAT5, A6QLV0, F1MSK0, G3X6E6, E1BPT8, E1BMF4, F1MDC0, A3KMY6, E1BNC9, G3X8E4, E1BHD7, F1N0U2, G5E618, F1MNU9, F1N768, E1BJI4, E1BIJ3, E1BCE6, F1N545	985	197	8740	1.62148	0.859146	0.130644	5.5631
SMART	SM00215:VWC_out	7	0.449006	0.0040898	F1MW38, F1MTV3, F1N0R5, E1BEY2, F1N740, F2FB42, G5E5A7, F2FB40	985	15	8740	4.14078	0.866854	0.125778	5.71818
SMART	SM00194:PTPc	11	0.705581	0.00411138	Q1KZG2, E1BFE2, E1BEZ8, F1MGK5, E1BIH4, E1B755, F1N008, F1N6W1, E1BPU9, E1BIU7, E1BJR7	985	35	8740	2.78869	0.868266	0.118989	5.74753
SMART	SM01337:SM01337	5	0.320718	0.00422338	E1BM39, E1BH40, E1BK00, E1B782, E1BNA9	985	7	8740	6.33793	0.875357	0.115284	5.8997
UP_KEYWORDS	Bromodomain	7	0.449006	0.00440027	F1MTQ0, E1BNS3, Q32S26, E1BNH8, F1MP49, E1BN25, F1MMU3	1470	20	17808	4.24	0.734835	0.137128	5.7256
GOTERM_CC_DIRECT	GO:0005813~centrosome	42	2.69403	0.00441475	G5E5A1, F1MB52, Q9XT97, F1N192, F1MYY5, A7Z056, E1BK00, F1MF87, G3X687, F1MXF5, Q2KIP2, G3X684, F1N5D5, E1BFI5, E1BK86, E1BC48, F1MVZ2, F1MBQ0, Q1RMU2, E1BG09, E1BJH3, E1BIK3, F1MDF3, A2VDN5, E1BHT5, Q5E9Y9, F1N7I5, E1BJB4, E1BC93, Q3ZBA8, F1MFK1, E1BLZ4, E1B860, A3KMW7, Q2T9X2, E1BIP5, E1BDX8, F1N3F6, E1B8X8, A6QQR4, F1N544, F1MM88	1297	321	15461	1.5597	0.933612	0.363671	6.34371
INTERPRO	IPR007087:Zinc finger, C2H2	60	3.84862	0.00442461	E1BPQ2, A6QNV5, E1B706, E1BCS5, F1N264, A7MAY9, E1B842, G3N2D0, A6H727, E1BGD3, F1MLJ0, D0VZF8, F1MFQ4, F1N1F0, E1BPM6, Q2TA17, E1BJ30, G3X834, E1BCA0, Q5E9U0, F1N0Y9, A6QQ84, E1BJR9, F1MI25, A8KC64, F1MDR1, Q3B7N9, E1BMR6, F1N4Z5, F1MW46, F1MIB3, F1MKA8, F1N215, F1MUR4, E1BQ01, G3MZX9, F1MR87, E1BFC1, F1MV30, F1MPW8, E1BPS7, F1MZB7, F1MLP0, F1N281, F1ML21, A0JNJ4, F1MCY1, E1BCL9, A4IFJ6, A2VDW9,…	1411	499	16802	1.43181	0.999852	0.123346	7.33627
SMART	SM00214:VWC	10	0.641437	0.00447227	P02453, F1MW38, F1N0R5, E1BEY2, P02459, F1N740, F2FB42, Q28178, Q95116, G5E5A7, F2FB40	985	30	8740	2.9577	0.889782	0.115309	6.23707
SMART	SM00439:BAH	6	0.384862	0.00461956	Q58DC8, F1MM81, E1BNH8, F1MSG4, E1BLK1, F1MGR3	985	11	8740	4.83987	0.89752	0.11299	6.43619
SMART	SM00429:IPT	9	0.577293	0.00469377	G3XCF6, F1N4C5, E1BK86, A6QNT0, E1BFR4, G3X755, E1BFT2, F1MAZ9, E1B7F6	985	25	8740	3.19431	0.901211	0.109292	6.53636
GOTERM_CC_DIRECT	GO:0030286~dynein complex	7	0.449006	0.00476036	F1N724, F1N1K6, Q32KS2, F1MK55, E1BLB4, F1MSP8, E1B9R5	1297	20	15461	4.17221	0.946339	0.34155	6.82415
GOTERM_MF_DIRECT	GO:0003700~transcription factor activity, sequence-specific DNA binding	55	3.5279	0.00485019	G3XCF6, A6QNV5, E1BJ63, F1MDD8, F1MGR3, E1B842, A5D7H2, E1BE01, E1BPP7, A6QPK5, Q2TA17, Q58DJ0, A5PJW1, E1BDD9, E1BCA0, A7YY50, F1N4M2, E1BFW7, A8KC64, F1MDR1, Q0VCS4, E1BH37, E1B8T3, E1BCE6, F1N215, G5E655, E1BGK7, A6QNT0, E1B8Z4, E1BFC1, E1BNX4, Q2KIA0, Q0VCT9, F1N281, F1ML21, Q0VCF8, F1MZP7, E1BCL9, A4IFJ6, A2VDW9, A6H7J1, G3N1T1, Q05B92, E1BN44, G3N1T3, E1BCC2, E1BIT4, G3X7K6, E1BI11, A5PJY6,…	1083	458	13095	1.45203	0.983645	0.239832	7.24233
GOTERM_CC_DIRECT	GO:0005884~actin filament	11	0.705581	0.00486274	F1MK51, E1BI79, A0JNC0, F1MNV8, Q06807, F6QPK8, E1BNV7, A7MB57, Q3B7N2, A6H742, A7MBG4	1297	47	15461	2.78992	0.949619	0.31169	6.96602
UP_SEQ_FEATURE	zinc finger region:C2H2-type 3	8	0.513149	0.00509015	Q2TA17, A0JNJ4, Q3B7N9, Q5E9U0, A4IFJ6, A2VDW9, A6H7J1, A6QPM3	270	50	6267	3.71378	0.993669	0.514798	7.73873
SMART	SM00297:BROMO	11	0.705581	0.00513039	F1MTQ0, E1BNS3, Q32S26, F1MNE1, F1MD96, E1BNH8, F1MP49, E1BN25, A6QLF6, F1MMU3, F1MY77	985	36	8740	2.71122	0.920393	0.113529	7.12372
SMART	SM00250:PLEC	4	0.256575	0.00521351	F1N6H4, E1BKT9, E1B9N6, F1N2K8	985	4	8740	8.8731	0.923599	0.110324	7.23515
GOTERM_BP_DIRECT	GO:0060976~coronary vasculature development	7	0.449006	0.00540187	F1N4C5, A7YY58, F1N6H1, E1BJ30, E1BPS6, Q27991, E1BH37	1190	20	13824	4.06588	1	0.85034	9.34276
GOTERM_MF_DIRECT	GO:0017056~structural constituent of nuclear pore	6	0.384862	0.00567624	E1BM06, F1MM55, A5PJZ5, E1BIX5, F1MH31, A6QM02	1083	15	13095	4.83657	0.991899	0.259912	8.42577
GOTERM_CC_DIRECT	GO:0031252~cell leading edge	8	0.513149	0.00569828	F1N0Y1, E1B864, F1MXG8, E1BPM7, E1BMC4, Q3B7N2, A6QP95, A5PJK4	1297	27	15461	3.53203	0.969894	0.322419	8.11639
INTERPRO	IPR011047:Quinonprotein alcohol dehydrogenase-like superfamily	9	0.577293	0.00607206	F1MLZ5, F1MNF4, E1BJG3, E1BBT8, E1BC63, E1BJ01, G3X6I6, F1N1R8, F1N406	1411	34	16802	3.15208	0.999995	0.163183	9.93595
INTERPRO	IPR001412:Aminoacyl-tRNA synthetase, class I, conserved site	6	0.384862	0.00607317	A7MBC5, G3X6L9, A5D7G0, A7YW98, Q2T9L8, Q0P5H7	1411	15	16802	4.76315	0.999995	0.161046	9.93767
INTERPRO	IPR011641:Tyrosine-protein kinase ephrin type A/B receptor-like	7	0.449006	0.00623649	E1BJ31, F1MJF1, P01267, F1MKR1, F1MNH3, E1BIE4, F1MFH7	1411	21	16802	3.96929	0.999996	0.162857	10.1916
GOTERM_CC_DIRECT	GO:0005925~focal adhesion	41	2.62989	0.0063688	F1N214, F1MG84, Q3SX26, E1BI26, E1BC64, F1N3L7, Q3B7N2, Q32PJ7, F1MCK2, F1MY84, P80747, F1MH31, P80746, E1BE25, G5E5X0, Q32LC7, F1N759, Q06807, F1MBA3, E1BNM2, F1MMN6, F1MDH3, E1BGX7, P61286, E1BGU2, F1MK51, E1BJ31, Q3MHM6, F1N6I9, G3N2W8, F1MF78, F1N371, E1B748, E1BGJ0, A3KMY6, P08169, E1BJV9, F1MER7, G3MY74, A7MB57, F1MQI1	1297	318	15461	1.53693	0.98009	0.324063	9.02996
INTERPRO	IPR000210:BTB/POZ-like	25	1.60359	0.0065219	E1BPM6, E1BPB7, Q52PG9, A3KMV1, F1MZB7, E1B7K3, A7MBG4, F1MPV7, F1MLP0, G3N351, F1MCW5, Q0VD00, G3X6H8, F1MMV0, E1BGD3, A4IFG2, E1BMR0, Q3B7N9, G3X8E7, E1BNC2, F1N7Q0, E1BF94, F1MFQ4, E1BJI4, G3MYD5	1411	167	16802	1.78261	0.999998	0.167485	10.6338
UP_SEQ_FEATURE	compositionally biased region:Pro-rich	13	0.833868	0.00669069	A7Z063, P98133, A2VE02, A6QLU3, Q17QF3, A7MB34, O97902, Q0VC16, Q9XSC3, Q0P5B1, Q9GMA3, Q0P5J8, A6QPM3	270	124	6267	2.43342	0.998718	0.565011	10.0537
GOTERM_BP_DIRECT	GO:0021772~olfactory bulb development	6	0.384862	0.0067389	E1BPM4, F1MKS6, A7Z067, E1BJB4, F1N4X0, F1MFI4	1190	15	13824	4.64672	1	0.881636	11.5244
GOTERM_BP_DIRECT	GO:0016525~negative regulation of angiogenesis	11	0.705581	0.00679787	A6QQE3, E1BJ31, Q06807, Q28178, E1BPP7, Q95116, F1MZU6, E1BNJ1, A6QPK5, E1BPU9, G3MZX5	1190	48	13824	2.66218	1	0.858723	11.6195
GOTERM_CC_DIRECT	GO:0000790~nuclear chromatin	23	1.4753	0.00695074	G3XCF6, Q2KJ94, E1BGX4, F1N2B6, E1BME7, E1BL06, E1BPS7, E1BJD1, Q0VCT9, F1MVD0, E1B9Q4, Q0VBZ5, F1MMW6, E1B925, A7MB60, E1BMR0, F1N7Q0, F1N3C8, F1MIH1, E1BPP7, F1N3F6, D2KFG0, G3MXN4	1297	150	15461	1.82782	0.986097	0.322061	9.81597
INTERPRO	IPR015880:Zinc finger, C2H2-like	56	3.59205	0.00701483	E1BPQ2, A6QNV5, E1B706, E1BCS5, F1N264, A7MAY9, E1B842, A6H727, E1BGD3, G3N2D0, F1MLJ0, D0VZF8, F1MFQ4, F1N1F0, E1BPM6, Q2TA17, E1BJ30, G3X834, Q5E9U0, E1BCA0, F1N0Y9, A6QQ84, E1BJR9, F1MI25, A8KC64, F1MDR1, Q3B7N9, E1BMR6, F1N4Z5, F1MW46, F1MIB3, F1MKA8, F1N215, F1MUR4, E1BQ01, E1BFC1, F1MV30, F1MPW8, E1BPS7, F1MZB7, F1MLP0, F1N281, F1ML21, A0JNJ4, F1MCY1, E1BCL9, A4IFJ6, A2VDW9, A6H7J1, A6QPM3,…	1411	469	16802	1.42183	0.999999	0.176727	11.3926
GOTERM_CC_DIRECT	GO:0000785~chromatin	13	0.833868	0.00715475	F1MM81, E1BKG4, Q2KJ94, F1MF21, F1MSG4, E1BGC3, F1MI56, E1BLK1, F1N685, E1BF96, E1BKC4, E1BCW1, E1BP17	1297	65	15461	2.38412	0.987743	0.307053	10.09
INTERPRO	IPR008979:Galactose-binding domain-like	14	0.898012	0.00722715	E1BJ31, F1N0T1, E1BM39, E1BH40, A4IFG2, E1BK00, E1B782, F1MCT1, F1MJQ2, E1BMQ7, F1MKR1, E1BNA9, E1BIE4, F1MFH7	1411	73	16802	2.2837	0.999999	0.179327	11.7175
GOTERM_CC_DIRECT	GO:0045111~intermediate filament cytoskeleton	9	0.577293	0.0072501	A5D7I2, F1N4M5, A6QNT0, F1MTM9, Q4JIJ2, E1B9N6, F1MFK1, F1MF78, F1N544	1297	35	15461	3.06529	0.988443	0.290444	10.2178
GOTERM_BP_DIRECT	GO:0000122~negative regulation of transcription from RNA polymerase II promoter	52	3.33547	0.00744218	Q9XT97, F1N616, F1N4V2, E1BJ63, G3N348, E1BGD3, A5D7H2, E1BE01, D0VZF8, A6QPK5, G3MXN4, Q1LZH7, E1BGW5, F1MHU9, A7YY50, E1BLZ5, E1BI30, A8KC64, Q0VBZ5, G3X8E4, E1BPY4, E1BMR3, D2KFG0, F1N215, Q2KIA0, F1MDK3, F1MCY1, E1BCL9, E1BHG2, E1B925, F1MS13, A6H7J1, E1BN44, E1BKC4, E1B7A1, A6QLA0, E1BIT4, A0A0A8JC39, P53781, A7YW40, E1B886, G3X7K5, F1MNS7, F1N6Y2, E1BPT8, A7Z088, F1MBQ8, F1MP88, E1BKK0, A5D…	1190	420	13824	1.43827	1	0.85979	12.652
GOTERM_MF_DIRECT	GO:0043531~ADP binding	6	0.384862	0.00770261	E1BKQ6, E1BNV7, Q29RI0, E1BP01, Q27991, E1B9Q4	1083	16	13095	4.53428	0.998558	0.319415	11.2693
UP_SEQ_FEATURE	compositionally biased region:Ser-rich	8	0.513149	0.00780381	A5D7E9, A3KMV8, Q32S26, Q08E13, A3KN19, Q32PJ7, Q1RMS0, Q58CX9	270	54	6267	3.43868	0.999579	0.578328	11.6315
GOTERM_BP_DIRECT	GO:0035264~multicellular organism growth	14	0.898012	0.00782477	F1MXE0, F1N2B6, Q5E9U0, E1BAT5, E1B8H2, F1N704, F1MQ85, E1BCZ2, E1BFB4, E1BGX7, F1N4X0, Q17QV9, F1MV76, G3MYD4	1190	72	13824	2.25882	1	0.851487	13.2597
INTERPRO	IPR018359:Bromodomain, conserved site	7	0.449006	0.00797668	F1MTQ0, E1BNS3, Q32S26, E1BNH8, F1MP49, E1BN25, F1MMU3	1411	22	16802	3.78887	1	0.193668	12.8558
GOTERM_BP_DIRECT	GO:0001701~in utero embryonic development	24	1.53945	0.0093069	E1BPQ2, F1N215, E1BPM4, F1MXE0, F1N607, F1N2B6, E1BAT5, E1B8H2, F1MSK0, E1BJB4, F1MV07, F1MY85, E1BMF4, A7MBG4, F1MCY1, E1BCZ2, P29473, E1BE01, E1BNR0, F1MCE7, Q27991, F1MV76, E1B883, F1N579	1190	159	13824	1.75348	1	0.878503	15.5763
GOTERM_MF_DIRECT	GO:0008013~beta-catenin binding	7	0.449006	0.00931367	E1BG86, E1BI79, Q9XT97, Q3MHM6, F1MV51, F1MP88, F1MRJ5	1083	23	13095	3.68	0.999635	0.355831	13.4709
GOTERM_CC_DIRECT	GO:0005634~nucleus	274	17.5754	0.00969301	F1MLE1, A7MBJ5, E1BGD3, E1B782, F1MBL6, G3N346, A6QP09, Q3SYU2, E1BFT2, Q2TBX0, F1N1F0, F1N1F1, F1N2J2, Q5W9D7, E1B7H0, Q2TA17, E1B864, G3N0J9, E1BPM4, E1BAT5, F1MNU7, G3MX98, F1MPV5, Q2T9Y1, A8KC64, Q3B7N9, F1N4Z5, F1MW46, E1BCE6, F1N0J9, F1MG84, E1BKG4, F1MR87, E1BMP7, E1BGZ6, E1B9T6, G3MWW2, F1MPW8, A6QLQ3, E1BNT2, F1N281, G5E5X0, Q3MI00, E1BF32, F1MZP7, Q1JQD9, E1BFB4, A6QLA0, E1BB33, G3X7K6,…	1297	2873	15461	1.13687	0.997448	0.347201	13.4354
INTERPRO	IPR002919:Trypsin Inhibitor-like, cysteine rich domain	5	0.320718	0.0100815	F1N5T7, F1MTV3, F1N0R5, F2FB42, G5E5A7, F2FB40	1411	11	16802	5.41267	1	0.235642	15.9788
INTERPRO	IPR026082:ABC transporter A, ABCA	5	0.320718	0.0100815	F1MWM0, E1BKP0, E1BCG1, F1MRL3, G5E556	1411	11	16802	5.41267	1	0.235642	15.9788
INTERPRO	IPR000331:Rap GTPase activating proteins domain	5	0.320718	0.0100815	E1BP38, F1MCG4, E1BHF6, E1BNT2, F1MXV4	1411	11	16802	5.41267	1	0.235642	15.9788
INTERPRO	IPR000859:CUB domain	11	0.705581	0.0102406	A6QPB1, F1N2I2, F1MVS9, F1N3H5, G3MX30, F1MKV7, F1MRN5, F1MJF1, E1BPS6, E1BNA9, F1MF04	1411	52	16802	2.51897	1	0.236154	16.2105
UP_SEQ_FEATURE	domain:Collagen IV NC1	3	0.192431	0.0103991	Q7SIB2, F1MJ71, F1MZU6	270	4	6267	17.4083	0.999969	0.645482	15.2102
GOTERM_BP_DIRECT	GO:0007605~sensory perception of sound	16	1.0263	0.0104768	E1BPM4, F1MTV3, E1B9T6, P02453, G3N348, F1MHF3, F1MZV0, F1N5T7, F1N0A6, F1MG13, P02459, E1BLT3, E1BJ03, E1BP01, E1BKC4, E1BP05	1190	91	13824	2.04252	1	0.89095	17.3635
GOTERM_BP_DIRECT	GO:0000226~microtubule cytoskeleton organization	11	0.705581	0.0105073	G5E5A1, P02548, E1BM39, E1BKZ0, F1N1S2, E1BK00, F1MBQ0, E1BPC9, Q2TBX0, F1N3L7, F1MAZ8	1190	51	13824	2.50559	1	0.87551	17.4096
GOTERM_CC_DIRECT	GO:0097228~sperm principal piece	6	0.384862	0.0108147	O77797, Q0IIG5, F1MZV1, Q3T064, F1MYH5, E1B9R5	1297	17	15461	4.20727	0.998726	0.35877	14.8764
GOTERM_BP_DIRECT	GO:0008589~regulation of smoothened signaling pathway	5	0.320718	0.0109835	F1MCY1, A7MB60, E1BJB4, F1MDL2, E1B860	1190	11	13824	5.28037	1	0.871309	18.1265
GOTERM_BP_DIRECT	GO:0021510~spinal cord development	5	0.320718	0.0109835	E1B7H0, Q4GZT3, Q0VCF8, E1BC86, Q2TBX0	1190	11	13824	5.28037	1	0.871309	18.1265
GOTERM_BP_DIRECT	GO:0060021~palate development	13	0.833868	0.0110686	F1MUR4, F1N215, F1N694, F1MB52, E1BPM4, Q2KIA0, E1BLY0, G3X8E4, A5D7C5, P02459, F1N740, F1MCE7, F1MDE1	1190	67	13824	2.25401	1	0.85794	18.2538
UP_KEYWORDS	Cell adhesion	24	1.53945	0.0110864	E1B864, Q9XT97, F1N0R5, Q3SX26, Q3MHM6, E1BD40, Q28178, A2VE02, P80747, P80746, E1BAU4, E1BGA0, F1MBA3, F1MMN6, E1BNM2, E1BM91, G1K1H0, F1MJ71, Q95116, E1BCK4, F1N401, Q27991, F1MZU6, F1N416	1470	168	17808	1.73061	0.965113	0.285066	13.8475
INTERPRO	IPR011511:Variant SH3	10	0.641437	0.0112604	F1MB71, Q0VC16, F1MEC0, A7YWJ7, F1MG13, G3MZJ5, G5E618, E1BB46, E1BIL8, E1BIJ3	1411	45	16802	2.64619	1	0.25362	17.6816
KEGG_PATHWAY	bta05412:Arrhythmogenic right ventricular cardiomyopathy (ARVC)	11	0.705581	0.0117966	E1B864, E1BKT9, F1MBA3, F1N5T3, Q3MHM6, F1MMN6, E1BNM2, F1MHZ1, P80747, P80746, E1BGA0	515	65	7550	2.48096	0.955884	0.323023	14.3918
GOTERM_BP_DIRECT	GO:0007420~brain development	15	0.962155	0.0119569	F1MB52, F1N4K6, G3X755, F1MGF7, F1MJE0, F1MD88, E1BEI6, F1N199, E1BLB6, Q7SIB2, F1MR77, Q9BDI3, A5D7P7, E1BKC4, E1B8X8	1190	84	13824	2.07443	1	0.864403	19.5733
KEGG_PATHWAY	bta04611:Platelet activation	17	1.09044	0.0120431	P02672, E1BHU9, E1BKE7, P19754, F1N0R5, E1BP75, F1MJQ6, F1MTP1, P02453, Q32S24, P02465, P29473, P02459, F1MBA3, F1MJ35, F1MDH3, F1MQI1	515	127	7550	1.96239	0.958686	0.298168	14.671
UP_KEYWORDS	Calcium	49	3.14304	0.0121274	E1BKE7, A6QP79, P98133, E1BD40, Q3B7N2, A2VDQ2, Q1LZ97, P80746, E1BAU4, P02453, Q8MHZ9, G3X6Y5, Q32S24, E1B949, E1B9E4, P29473, F1N5T3, P02459, F1MBA3, Q3SZP7, P54281, Q95116, E1BMQ7, F1N416, A6H742, G3MYD4, E1BEY2, A7E306, F1MKV7, F1MJF1, Q28178, F1MTK6, E1BE11, E1B9K4, A6QQP7, P23805, F1MN86, Q4GZT3, M5FK30, P02465, A2VE41, F1MVS9, F1MHH5, F1MJ35, E1BM91, E1BDZ7, F1N7J2, E1BCK4, Q2HJ89	1470	418	17808	1.4201	0.974591	0.283859	15.0521
INTERPRO	IPR000387:Protein-tyrosine/Dual specificity phosphatase	14	0.898012	0.0125313	Q1KZG2, E1BFE2, E1BEZ8, F1MGK5, E1BIH4, E1B755, E1BPA6, F1N008, F1N6W1, E1BIU7, E1BPU9, E1BJR7, E1BAA9, A6QNU6	1411	78	16802	2.13731	1	0.274988	19.4809
GOTERM_CC_DIRECT	GO:0030426~growth cone	10	0.641437	0.0128853	Q9XT97, F1MNV8, E1BPU0, Q2TBX0, Q3ZBA8, Q27991, G5E6R9, F1MFI4, Q1RMT6, F1N791	1297	46	15461	2.59143	0.999647	0.391571	17.4779
GOTERM_BP_DIRECT	GO:0035556~intracellular signal transduction	36	2.30917	0.0129293	Q9XT97, G3X788, F1N5B2, E1BNV7, Q2KIP2, E1BP75, F1MY84, A1A4I4, F1N5N3, F1N657, F1MQJ7, F1MJV1, E1B9E4, F1MVZ2, Q08DV6, E1BGX7, F1MK99, A6QP95, E1BH25, E1BH60, Q0P5I2, P19754, E1BBX9, P53781, F1MYV9, F1MFK1, A7MBK3, E1BKN8, F1N2K7, E1BE90, E1BM51, F1MMW6, F1MTH3, F1MLS3, E1BIL8, P55203	1190	276	13824	1.51524	1	0.871721	20.9947
GOTERM_MF_DIRECT	GO:0003677~DNA binding	70	4.49006	0.0129585	G3XCF6, E1B9V4, E1BKQ6, E1BIF0, E1BJ63, E1B706, A7MB37, E1BLU4, Q32LC7, F1MF21, G3N2D1, E1BPP7, A5D7D3, F1N1F0, E1BF96, G3MYB9, A7Z027, Q2TA17, E1BKN0, Q5E9U0, F1MNB5, F1N4M2, A8KC64, A4FUF0, Q08E27, E1BPY8, Q3B7N9, E1BGN7, E1BCE6, F1MUR4, Q0P5J0, A5D786, E1B8Z4, A6QNT0, Q2TA45, E1BMC0, F1MXF5, E1BMP7, F1N2W4, F1MUR2, G3MWW2, F1MPW8, Q2KIA0, E1BPS7, F1MLP0, F1ML21, A0JNJ4, E1BCL9, F1MZP7, E1B925,…	1083	640	13095	1.3225	0.999984	0.440529	18.2646
INTERPRO	IPR008984:SMAD/FHA domain	10	0.641437	0.0129851	E1B8X2, E1B7A1, E1BDB1, F1MP14, Q58DJ0, F1MP58, G3X690, G3X6H0, F1MD97, E1BH37	1411	46	16802	2.58867	1	0.280407	20.1142
UP_SEQ_FEATURE	zinc finger region:C2H2-type 1	7	0.449006	0.0130763	Q2TA17, A0JNJ4, Q3B7N9, Q5E9U0, A4IFJ6, A2VDW9, G3N351	270	46	6267	3.53213	0.999998	0.694871	18.7591
GOTERM_BP_DIRECT	GO:0050885~neuromuscular process controlling balance	10	0.641437	0.0130781	P02548, E1BHU9, E1BL01, G5E618, F1MXG8, E1B755, E1BJ03, F1MJQ2, Q27991, F1MNS0	1190	45	13824	2.58151	1	0.861712	21.2101
GOTERM_MF_DIRECT	GO:0046872~metal ion binding	116	7.44067	0.0130833	A6QNV5, A6QP79, Q52PG9, E1BNV7, E1B706, E1BCS5, F1N264, O97902, P02453, A7MAY9, G3N2D0, A6H727, Q0IIG5, E1BGD3, Q32S24, F1N5T6, P02459, F1MBA3, G3N346, F1MEM8, A6QP09, D0VZF8, E1BFT2, F1N1F0, E1BPM6, Q2TA17, G3X834, Q5E9Y9, A6QQ84, A8KC64, F1MBB7, P02465, Q0QEX9, Q3B7N9, F1N4Z5, F1MW46, E1BGN7, F1MIB3, F1MKA8, F1N215, F1MR87, E1BFC1, E1BMP7, F1MPP7, E1BPS7, E1BPS3, F1MLP0, F1ML21, F1N281, E1BKW5,…	1083	1142	13095	1.2282	0.999986	0.427118	18.4243
UP_KEYWORDS	Extracellular matrix	18	1.15459	0.0131611	F1MUC5, F1N0R5, P98133, E1BPV7, F1MJQ6, F1MTP1, P02453, E1BCT7, Q7SIB2, Q32S24, P02465, G3MXE4, P02459, P23206, F1MJ71, A3KN33, F1N401, F1MZU6	1470	115	17808	1.89615	0.981459	0.282739	16.2328
GOTERM_MF_DIRECT	GO:0030169~low-density lipoprotein particle binding	5	0.320718	0.0133861	F1MYW1, A6QP79, Q28178, E1BNJ1, E1BPZ1	1083	12	13095	5.03809	0.999989	0.418945	18.8104
PIR_SUPERFAMILY	PIRSF000666:tyrosine-protein kinase, ephrin receptor type	4	0.256575	0.0137668	E1BJ31, F1MKR1, E1BIE4, F1MFH7	83	10	1521	7.33012	0.646433	0.646433	13.5399
INTERPRO	IPR008936:Rho GTPase activation protein	14	0.898012	0.0138823	F1N4C5, F1MHG5, A6QPU2, F1N7Q8, G3N3K9, E1BFR4, E1BM23, G3X755, E1BNV7, E1BFY5, A6H7H0, F1MPV3, A7MB08, E1B7F6	1411	79	16802	2.11025	1	0.293596	21.3529
UP_KEYWORDS	Actin-binding	20	1.28287	0.0139581	E1BJV1, A7Z063, A0JNC0, F1MF78, Q32PJ7, Q3B7N2, Q17R14, G3MWR8, F1MCY2, E1BE25, F1N6H4, G3N373, E1BLT3, F1MKE9, Q3SZP7, E1BP01, A6QPA6, Q27991, Q9BE41, A6H742	1470	134	17808	1.8081	0.985462	0.277805	17.1329
SMART	SM00233:PH	37	2.37332	0.0140515	F1MPJ6, E1BIQ2, F1MH50, Q1KZG5, E1BAW4, A6QR57, F1MD97, A6QLU3, O97902, F1MHG5, F1N657, F1MW59, F1MJV1, E1BKY4, E1BB02, A6QP95, A6QPU2, E1BH60, G3N3K9, F1MQ30, E1BPM7, F1N6I9, A5PK34, E1B7L9, F1MUS9, A3KMY6, E1BE90, F1MF11, F1MTH3, A7MB72, A4IFK0, F1MLS2, E1BLT3, F1MKE9, F1MLS3, E1BJV9, F1MSU8	985	221	8740	1.48554	0.999053	0.261187	18.3983
GOTERM_CC_DIRECT	GO:0032039~integrator complex	5	0.320718	0.0140736	E1BJI9, Q2YDM2, Q1RMS6, E1B8S1, A1L552	1297	12	15461	4.96691	0.999831	0.400154	18.9373
INTERPRO	IPR014853:Uncharacterised domain, cysteine-rich	5	0.320718	0.0141315	F1N5T7, F1MTV3, F1N0R5, F2FB42, G5E5A7, F2FB40	1411	12	16802	4.96161	1	0.294948	21.6937
INTERPRO	IPR000033:LDLR class B repeat	5	0.320718	0.0141315	F1N6H1, A7E306, F1MDE1, E1BGJ0, E1BPZ1	1411	12	16802	4.96161	1	0.294948	21.6937
GOTERM_BP_DIRECT	GO:0007275~multicellular organism development	24	1.53945	0.0142203	Q5W9D7, Q0P5J0, P53781, A6QLL3, Q2TA45, E1BAT5, E1BCA0, F1N365, A6QPW7, F1MI25, Q32L62, E1BDQ0, Q0VD00, E1B842, F1N759, F1MDR1, E1BCL9, Q08E27, Q0VCS4, A6QPH9, F1MW46, E1BFT2, F1N1F0, E1BN44	1190	165	13824	1.68972	1	0.871857	22.8451
GOTERM_CC_DIRECT	GO:0036064~ciliary basal body	13	0.833868	0.0143282	F1MB52, E1BJB4, E1BC93, F1MDL2, E1BIU7, E1B860, E1BK86, Q4GZT3, F1MG59, E1BL95, Q1RMU2, E1BG09, E1BP05	1297	71	15461	2.18264	0.999856	0.388282	19.2468
UP_SEQ_FEATURE	compositionally biased region:Poly-Glu	9	0.577293	0.0145006	Q32KS2, Q4GZT3, F1MXS1, Q9XT97, Q58DJ0, Q1JQD9, Q08DI0, Q9TTK4, G3N351	270	75	6267	2.78533	0.999999	0.701055	20.5901
INTERPRO	IPR011333:BTB/POZ fold	25	1.60359	0.0148786	E1BPM6, E1BPB7, Q52PG9, A3KMV1, F1MZB7, E1B7K3, A7MBG4, F1MPV7, F1MLP0, G3N351, F1MCW5, Q0VD00, G3X6H8, F1MMV0, E1BGD3, A4IFG2, E1BMR0, Q3B7N9, G3X8E7, E1BNC2, F1N7Q0, E1BF94, F1MFQ4, E1BJI4, G3MYD5	1411	179	16802	1.66311	1	0.304836	22.707
GOTERM_MF_DIRECT	GO:0008270~zinc ion binding	98	6.28608	0.014906	F1MXS1, E1BIF0, Q3SZN2, A5D7L9, Q24K16, F1MNE1, E1B782, Q2TBX0, E1BDF2, F1MPM5, A8E651, E1BKN0, Q0P5M8, F1N0Y9, F1MTK6, F1MPV5, F1MLM2, E1BC50, E1BI72, A5PJW9, E1BP91, F1MPW8, G3MWW2, E1BC64, E1BJC6, G5E5X0, F1N2H2, Q1JQD9, Q08DF2, F1MS13, A6QPH9, Q1RMU2, E1BHT5, E1BBN5, A6QLA0, E1BFD3, E1BNA9, G5E6I8, E1BIX5, F1MYV2, E1BGP4, E1BCZ2, E1BIP5, E1BLT8, F1N3F6, E1BL26, Q3SX26, E1BH94, A7Z056, F1MFD2,…	1083	948	13095	1.24996	0.999997	0.43871	20.7231
SMART	SM01411:SM01411	7	0.449006	0.0149626	E1BJ31, F1MJF1, P01267, F1MKR1, F1MNH3, E1BIE4, F1MFH7	985	19	8740	3.26904	0.999399	0.265857	19.4751
GOTERM_CC_DIRECT	GO:0015629~actin cytoskeleton	20	1.28287	0.0150792	F1MK51, A7YWJ7, G3X7K6, F1MTM9, F1MXG8, Q3MHM6, F1N6I9, G3X684, E1BPT8, F1MCK2, E1BLC6, E1BBZ3, E1BHC8, F1N6S8, F1N7Q8, E1BM06, F6QPK8, E1BNR0, Q1RMT6, G3MYD5	1297	133	15461	1.79257	0.99991	0.387502	20.1534
GOTERM_CC_DIRECT	GO:0000118~histone deacetylase complex	7	0.449006	0.0151677	F1N616, E1BFC1, G3X7K5, F1MS13, E1BI11, F1MGR3, G3MXN4	1297	25	15461	3.33776	0.999915	0.37403	20.2596
GOTERM_MF_DIRECT	GO:0005041~low-density lipoprotein receptor activity	4	0.256575	0.015284	A6QPB1, F1MYW1, F1MDE1, E1BNJ1	1083	7	13095	6.90938	0.999998	0.432506	21.1921
GOTERM_MF_DIRECT	GO:0005049~nuclear export signal receptor activity	4	0.256575	0.015284	A1A4I8, F1MUF1, Q2YDG6, F1MH31	1083	7	13095	6.90938	0.999998	0.432506	21.1921
GOTERM_BP_DIRECT	GO:0046835~carbohydrate phosphorylation	5	0.320718	0.0153701	Q0IIG5, F1MZV1, A6H768, Q3SZM9, Q58DK4	1190	12	13824	4.84034	1	0.880617	24.4586
UP_SEQ_FEATURE	domain:BTB	5	0.320718	0.0154215	Q0VD00, A4IFG2, Q3B7N9, A3KMV1, G3N351	270	23	6267	5.04589	1	0.694544	21.7532
GOTERM_CC_DIRECT	GO:0005677~chromatin silencing complex	4	0.256575	0.0159029	F1MM81, A7Z027, F1MSG4, E1BLK1	1297	7	15461	6.81176	0.999946	0.373711	21.1368
INTERPRO	IPR000034:Laminin B type IV	4	0.256575	0.0159542	F1N0T1, F1MEG3, F1MER7, F1MMT2	1411	7	16802	6.8045	1	0.319826	24.1443
INTERPRO	IPR000800:Notch domain	4	0.256575	0.0159542	G3X812, F1MPE9, F1N7Z6, E1BPT8	1411	7	16802	6.8045	1	0.319826	24.1443
GOTERM_BP_DIRECT	GO:0045944~positive regulation of transcription from RNA polymerase II promoter	66	4.23348	0.0161626	G3XCF6, E1BIQ2, F1MME0, E1BC86, F1MVD0, F1N264, A6H727, F1ML06, A5D7H2, Q9BDI3, E1BE01, G3N346, E1BPP7, E1B7W1, E1BFT2, A6QPK5, G3MXN4, E1BDS6, E1BPM4, Q58DJ0, F1MKX9, Q3SZK6, A0JNB7, F1MNB5, E1BAD7, E1BI30, Q0VBZ5, F1N4Q7, Q0VCS4, E1BPY4, F1MIH1, D2KFG0, A7MB57, E1B6Z5, E1BCE6, E1B8T3, F1MIB3, A8E4N8, F1N215, F1MG84, A6QNT0, E1BNX4, F1N2W4, G3MWW2, Q2KIA0, F1MDK3, Q0VCT9, Q0VCF8, A2VDW9, E1BKC4,…	1190	580	13824	1.32191	1	0.882668	25.5521
UP_SEQ_FEATURE	domain:TSP N-terminal	3	0.192431	0.016843	Q32S24, Q28178, Q95116	270	5	6267	13.9267	1	0.699891	23.5173
GOTERM_BP_DIRECT	GO:0003151~outflow tract morphogenesis	8	0.513149	0.0170451	F1N4C5, E1BPR4, F1MKX9, A6QQX6, Q2KIA0, G3N2W8, Q0VCT9, E1BKC4	1190	32	13824	2.9042	1	0.885859	26.752
GOTERM_BP_DIRECT	GO:0043589~skin morphogenesis	4	0.256575	0.0170596	P02453, Q9XT97, P02465, Q0P5K6	1190	7	13824	6.63818	1	0.876144	26.7716
INTERPRO	IPR011527:ABC transporter, transmembrane domain, type 1	8	0.513149	0.0177667	E1BNL1, F1MC51, E1BKR6, G3MYQ9, E1BLT5, P35071, F1MUC1, A5D7P7	1411	33	16802	2.88676	1	0.345885	26.5095
UP_SEQ_FEATURE	zinc finger region:C2H2-type 5	6	0.384862	0.0177832	Q2TA17, A0JNJ4, Q3B7N9, A4IFJ6, A2VDW9, A6H7J1	270	36	6267	3.86852	1	0.694756	24.6636
GOTERM_BP_DIRECT	GO:0007156~homophilic cell adhesion via plasma membrane adhesion molecules	16	1.0263	0.0182885	F1N4K6, E1BD40, A2VDQ2, E1BPU9, F1N199, E1BAU4, G3X6Y5, F1N279, E1B949, F1MHH5, F1MNG8, F1MZX3, E1BM91, E1BCK4, F1N416, G3MYD4	1190	97	13824	1.91617	1	0.884388	28.4119
GOTERM_CC_DIRECT	GO:0072372~primary cilium	7	0.449006	0.0183548	E1BK86, F1N215, A6H727, E1BP93, E1BHU9, F1N5T6, P48733	1297	26	15461	3.20939	0.999988	0.403206	23.9978
INTERPRO	IPR009057:Homeodomain-like	33	2.11674	0.0183822	E1BEL3, E1B9V4, F1N693, E1BEL1, E1BFC1, A2VDX5, E1BME7, E1B9T6, F1MPW8, E1BPS7, F1MGR3, F1N264, E1BLU4, E1BJ03, G3MYB9, A7Z027, G3N3S1, A6QLL3, G3X7K5, A4IF73, E1BI11, F1MKX5, E1BAD7, A8KC64, F1MU46, F1MR77, A5D7C5, A5PJT5, Q0VCS4, F1MM89, Q9GMA3, F1MIH1, F1MFP5	1411	260	16802	1.51138	1	0.352183	27.2968
INTERPRO	IPR000014:PAS domain	7	0.449006	0.0184562	E1BLH0, F1N4Q7, E1BJ63, E1BPY4, F1MDK3, F1MVD0, A5PKI1	1411	26	16802	3.20596	1	0.350039	27.391
INTERPRO	IPR001846:von Willebrand factor, type D domain	5	0.320718	0.0190794	F1N5T7, F1MTV3, F1N0R5, F2FB42, G5E5A7, F2FB40	1411	13	16802	4.57995	1	0.356227	28.1789
INTERPRO	IPR001734:Sodium/solute symporter	5	0.320718	0.0190794	A7MBD8, Q6R4Q5, F1MT46, Q6XUI1, Q3ZC26	1411	13	16802	4.57995	1	0.356227	28.1789
INTERPRO	IPR003595:Protein-tyrosine phosphatase, catalytic	11	0.705581	0.0191344	Q1KZG2, E1BFE2, E1BEZ8, F1MGK5, E1BIH4, E1B755, F1N008, F1N6W1, E1BPU9, E1BIU7, E1BJR7	1411	57	16802	2.29801	1	0.353816	28.2481
GOTERM_MF_DIRECT	GO:0048407~platelet-derived growth factor binding	3	0.192431	0.0193389	P02453, P02465, P02459	1083	3	13095	12.0914	1	0.497608	26.0634
GOTERM_BP_DIRECT	GO:0001570~vasculogenesis	10	0.641437	0.0196512	Q5W9D7, E1BDB1, E1BJ31, Q0VBZ5, F1N616, F1MXE0, E1BK00, Q9BDI3, E1B8H2, Q0VCT9	1190	48	13824	2.42017	1	0.893224	30.1901
GOTERM_CC_DIRECT	GO:1990357~terminal web	3	0.192431	0.0198889	P08728, Q3B7N2, A6H742	1297	3	15461	11.9206	0.999996	0.41458	25.7383
INTERPRO	IPR021097:CPH domain	3	0.192431	0.0199336	E1BM39, E1BK00, E1B782	1411	3	16802	11.9079	1	0.362361	29.246
INTERPRO	IPR018890:Uncharacterised protein family FAM171	3	0.192431	0.0199336	E1BNG6, F1N5L7, A7MB22	1411	3	16802	11.9079	1	0.362361	29.246
INTERPRO	IPR009738:BAT2, N-terminal	3	0.192431	0.0199336	E1BAF6, G3X6B2, E1BGB2	1411	3	16802	11.9079	1	0.362361	29.246
UP_SEQ_FEATURE	site:Cleavage	4	0.256575	0.0200248	P51749, Q9XT97, Q2KIA0, D2KFG0	270	14	6267	6.63175	1	0.714678	27.332
GOTERM_CC_DIRECT	GO:0005794~Golgi apparatus	59	3.78448	0.0201382	F1N693, F1MUD3, Q9XT97, A6QP73, Q3SZN2, E1B991, E1BLA8, E1B8X1, G3X684, A6QR57, F1MDD8, A7MBJ5, F1MF68, B0JYK2, F1MHG5, A5D7H2, A5D7P7, A5D7D3, Q9BE41, E1BB52, E1BI79, Q3MHM6, E1BAD7, E1B9Q4, A4FUF0, P08169, F1N647, E1BNR0, A7MB57, A6QLC7, P30274, E1B7E3, A7Z036, Q95JC7, E1BK00, F1MGF7, E1BML2, E1BNT2, F1MLY7, P29473, F1MZK8, A7MBE2, Q9XSC3, F1N6V7, A5D7F6, E1BGU2, F1MKV7, E1BKJ5, Q3ZBA8, E1BKJ9,…	1297	528	15461	1.33204	0.999996	0.405249	26.0176
GOTERM_BP_DIRECT	GO:0050772~positive regulation of axonogenesis	5	0.320718	0.0207171	F1N279, P02548, G3X755, E1B7F6, F1N199	1190	13	13824	4.468	1	0.897539	31.5518
GOTERM_BP_DIRECT	GO:0016180~snRNA processing	5	0.320718	0.0207171	E1BJI9, Q2YDM2, Q1RMS6, E1B8S1, A1L552	1190	13	13824	4.468	1	0.897539	31.5518
GOTERM_BP_DIRECT	GO:0045109~intermediate filament organization	5	0.320718	0.0207171	P02548, E1BKT9, Q2TA45, E1B991, G3MX98	1190	13	13824	4.468	1	0.897539	31.5518
GOTERM_BP_DIRECT	GO:0071364~cellular response to epidermal growth factor stimulus	5	0.320718	0.0207171	F1MQJ7, P53781, Q3SZP7, Q2TBX0, F1MSS9	1190	13	13824	4.468	1	0.897539	31.5518
GOTERM_BP_DIRECT	GO:0009086~methionine biosynthetic process	3	0.192431	0.0209064	A4FUD0, Q4JIJ2, Q4JIJ3	1190	3	13824	11.6168	1	0.89168	31.7911
GOTERM_BP_DIRECT	GO:0072218~metanephric ascending thin limb development	3	0.192431	0.0209064	Q4GZT3, E1BC86, P48733	1190	3	13824	11.6168	1	0.89168	31.7911
INTERPRO	IPR008967:p53-like transcription factor, DNA-binding	9	0.577293	0.0217737	G3XCF6, E1BLY0, A6QNT0, E1B8Z4, F1MZP7, E1BGZ6, E1BPP7, F1MAZ9, F1N4M2	1411	42	16802	2.55169	1	0.385234	31.4942
INTERPRO	IPR016201:Plexin-like fold	9	0.577293	0.0217737	F1N4C5, E1B864, E1BG65, E1BFR4, G3X755, E1BE15, E1BPS6, E1B7F6, P80747	1411	42	16802	2.55169	1	0.385234	31.4942
INTERPRO	IPR001164:Arf GTPase activating protein	6	0.384862	0.0220723	O97902, A3KMY6, Q2TA45, E1BIQ2, E1BB02, Q5EA00	1411	20	16802	3.57236	1	0.386049	31.8526
COG_ONTOLOGY	Cell division and chromosome partitioning	13	0.833868	0.0221767	E1BLC3, F1MSI9, E1BKQ6, E1BI79, E1BC48, F1N7I5, E1BBR6, F1N2K8, E1BKY4, A5D7N7, E1B9B0, E1BIU7, F1MH31	169	64	1671	2.00841	0.512099	0.512099	17.6532
GOTERM_BP_DIRECT	GO:0046777~protein autophosphorylation	18	1.15459	0.0222278	G3X788, E1BPU0, A7Z067, F1MP49, Q8WMV0, F1MKR1, F1MLY7, F1N791, F1MVF1, F1N759, Q06807, F1MBL6, E1BFB4, E1BP01, E1BIE4, E1BH35, F1MFH7, F1N2J2	1190	117	13824	1.7872	1	0.898578	33.439
COG_ONTOLOGY	Cell division and chromosome partitioning / Cytoskeleton	7	0.449006	0.0222997	F1MMV0, E1BH40, E1B782, F1MCW5, F1MDF3, F1MNS0, F1MM88	169	23	1671	3.00926	0.514058	0.302905	17.7428
SMART	SM00033:CH	13	0.833868	0.0228174	E1BE25, F1N6H4, F1MHF3, F1MQA8, E1BJV1, F1MKE9, E1BLT3, A6H7H0, E1BC91, F1MF78, Q3B7N2, A6H742, G3MWR8	985	57	8740	2.02369	0.999988	0.365076	28.225
INTERPRO	IPR016130:Protein-tyrosine phosphatase, active site	12	0.769724	0.0229106	Q1KZG2, E1BFE2, E1BEZ8, E1BAA9, F1MGK5, E1BIH4, E1B755, E1BPA6, F1N008, F1N6W1, E1BPU9, E1BJR7	1411	67	16802	2.13275	1	0.394123	32.8494
INTERPRO	IPR013083:Zinc finger, RING/FYVE/PHD-type	45	2.88647	0.0237907	F1MLY5, E1BL26, E1BH40, Q08E13, A7Z056, F1MFD2, F1MUR2, E1BJC6, F1MQ85, E1BPS3, F1MNE1, E1B847, F1N2H2, Q08DF2, F1MS13, E1BN25, F1N415, E1B7A1, F1MPM5, A8E4M5, E1BBN5, F1MQ30, E1BKN0, E1BFD3, F1MP49, E1BBR6, G3MWR7, F1N6Y2, E1BLZ4, F1MLM2, F1N2K7, F1MY77, F1MYV2, F1MDC0, A6QQE3, E1BCZ2, E1BIP5, F1MD96, E1BC35, E1BMN9, E1BJI0, F1N3F6, A6QNS2, F1MLK1, F1N544	1411	387	16802	1.38464	1	0.402479	33.8812
GOTERM_CC_DIRECT	GO:0097431~mitotic spindle pole	4	0.256575	0.0238771	A3KMW7, F1N7I5, A3KN19, F1MGF7	1297	8	15461	5.96029	1	0.447096	30.0908
INTERPRO	IPR011072:HR1 rho-binding repeat	4	0.256575	0.0239522	F1N4C8, E1BAW4, F1MFK1, A1A4I4	1411	8	16802	5.95393	1	0.401295	34.0688
UP_SEQ_FEATURE	nucleotide phosphate-binding region:ATP	18	1.15459	0.0241468	Q58DC8, A2VDN5, Q2KJ94, F1MPP7, Q8WMV0, Q58DK4, P62194, Q17R14, Q0IIG5, A6H768, Q06807, Q3SZM9, Q0V8H6, Q27991, Q17QV9, Q9BE41, Q4PKH3, A6QQR4	270	235	6267	1.77787	1	0.75981	32.0092
UP_SEQ_FEATURE	domain:Collagen-like	4	0.256575	0.0242527	Q8MHZ9, A5PJQ2, P23805, Q2KIV9	270	15	6267	6.18963	1	0.741554	32.1256
GOTERM_BP_DIRECT	GO:0048675~axon extension	6	0.384862	0.0242823	F1N1S2, E1BPM7, E1BJ03, F1MEB4, E1B7F6, E1BH35	1190	20	13824	3.48504	1	0.911468	35.9265
GOTERM_CC_DIRECT	GO:0030027~lamellipodium	17	1.09044	0.0243325	F1N4C5, F1MK51, F1MTM9, F1MPJ6, F1MH50, Q3MHM6, Q3B7N2, E1BEQ5, F1MFK1, E1BPU9, F1MCY2, A6QQP7, Q4GZT3, Q3SZP7, E1BKY4, Q27991, F1MDF3	1297	112	15461	1.80937	1	0.440538	30.5723
UP_SEQ_FEATURE	domain:VWFC	3	0.192431	0.0245543	P02453, Q28178, Q95116	270	6	6267	11.6056	1	0.726921	32.456
UP_SEQ_FEATURE	glycosylation site:O-linked (Gal...)	3	0.192431	0.0245543	P02453, P02459, Q2KIV9	270	6	6267	11.6056	1	0.726921	32.456
UP_SEQ_FEATURE	domain:Arf-GAP	3	0.192431	0.0245543	O97902, Q2TA45, Q5EA00	270	6	6267	11.6056	1	0.726921	32.456
INTERPRO	IPR007123:Gelsolin domain	5	0.320718	0.0249728	E1BPR4, Q3SZN2, Q3SZP7, F1N365, F1MV07	1411	14	16802	4.25281	1	0.411096	35.2435
GOTERM_BP_DIRECT	GO:0030334~regulation of cell migration	10	0.641437	0.025185	F1N4C5, F1N6S8, G3N3S1, E1BFR4, F1MEG3, G3X755, F1MYX9, F1MMT2, A6QLU3, E1B7F6	1190	50	13824	2.32336	1	0.912791	36.9915
GOTERM_BP_DIRECT	GO:0007041~lysosomal transport	4	0.256575	0.0255711	F1MJ84, E1BJV1, E1BDC9, B0JYK2	1190	8	13824	5.8084	1	0.909687	37.442
GOTERM_BP_DIRECT	GO:0048568~embryonic organ development	4	0.256575	0.0255711	E1BCZ2, F1N607, F1MCE7, F1N579	1190	8	13824	5.8084	1	0.909687	37.442
GOTERM_BP_DIRECT	GO:0055085~transmembrane transport	17	1.09044	0.0257715	P41987, Q95JC7, E1BEZ1, E1B9Q0, Q29397, Q58CV5, A1A4I3, Q3ZC26, F1MC51, B2DG24, Q6R4Q5, G3MYQ9, E1BLT5, A5D7P7, G3N0T6, Q1JQC1, A5D7V7	1190	110	13824	1.79532	1	0.905042	37.6744
INTERPRO	IPR000203:GPS domain	7	0.449006	0.0261768	F1N570, F1MK80, A6QLU6, F1MHH5, E1BC86, F1ME74, G3MZX5	1411	28	16802	2.97697	1	0.422805	36.6037
GOTERM_CC_DIRECT	GO:0030424~axon	17	1.09044	0.0262222	G3N1H6, E1BE71, Q9XT97, F1MNV8, A2VDX5, E1BPU0, E1B7K3, Q17R14, F1N791, P02548, F1MNG8, E1BMN9, Q2TBX0, F1MEB4, Q27991, F1MK99, G5E6R9	1297	113	15461	1.79336	1	0.452988	32.5377
INTERPRO	IPR000719:Protein kinase, catalytic domain	52	3.33547	0.0264498	G3X788, E1BPU0, F1N5B2, Q2KIP2, A1A4I4, F1MKK7, E1BP17, F1N791, F1N759, F1MQJ7, E1B847, F1MCE7, E1BIE4, F1N2J2, F1MFH7, E1BJ31, E1BB52, Q0P5I2, E1BQ34, A6QLV0, Q3SZK6, A7Z067, Q8WMV0, F1MFK1, E1B7L9, F1MVF1, E1B9F9, F1N0U2, P55203, A7MB57, E1BH35, E1BBM3, F1MIB7, E1BC64, F1MAZ8, E1BC69, Q06807, F1MVZ2, E1BP01, A6QP95, F1MXG8, F1MYV9, E1BKP7, F1MKR1, G3N022, F1MC27, E1BM51, A7MB72, E1BM19, F1MLS2,…	1411	462	16802	1.34028	1	0.422853	36.9084
GOTERM_BP_DIRECT	GO:0006405~RNA export from nucleus	5	0.320718	0.0270718	F1MM55, F1MUF1, E1BIX5, F1MH31, A6QM02	1190	14	13824	4.14886	1	0.909825	39.1637
SMART	SM00327:VWA	14	0.898012	0.0271992	F1N0R5, F1MD40, F1MHZ1, E1BPV7, P80747, E1B9L7, G3MXE4, F1MBA3, F1MMN6, A5D7R6, P54281, F1N401, F1MNH3, E1BMV3	985	65	8740	1.91113	0.999999	0.406561	32.7131
SMART	SM00832:SM00832	5	0.320718	0.0275409	F1N5T7, F1MTV3, F1N0R5, F2FB42, G5E5A7, F2FB40	985	11	8740	4.03323	0.999999	0.398841	33.0519
GOTERM_CC_DIRECT	GO:0030139~endocytic vesicle	8	0.513149	0.0277388	A6QQP7, F1N6H1, F1MBU9, P08169, F1MPJ6, F1MKV7, A6QR57, E1BKY4	1297	36	15461	2.64902	1	0.459826	34.0775
INTERPRO	IPR000159:Ras-association	8	0.513149	0.0279031	E1B8X2, E1BDB1, A6QNW5, E1BPM7, E1BGA9, E1BNV7, F1MTE8, G5E5D0	1411	36	16802	2.64619	1	0.43694	38.5072
INTERPRO	IPR011042:Six-bladed beta-propeller, TolB-like	8	0.513149	0.0279031	F1N6H1, A7E306, E1BGX8, E1BMG7, F1MDE1, A5PJW9, E1BGJ0, E1BPZ1	1411	36	16802	2.64619	1	0.43694	38.5072
SMART	SM00228:PDZ	23	1.4753	0.0279107	E1B8X2, F1N0Y1, F1MEC0, E1BKQ6, G3N3K9, E1BIH4, F1N4C8, G3X6D0, E1BHF6, E1BKK6, E1BC64, F1MCK2, E1BM96, F1MXV4, E1BJR7, F1MHG5, A5D7L3, F1MSI9, F1MMW6, F1MTH3, G5E618, I6L1R7, F1N415	985	128	8740	1.59438	0.999999	0.391893	33.4167
GOTERM_MF_DIRECT	GO:0001078~transcriptional repressor activity, RNA polymerase II core promoter proximal region sequence-specific binding	15	0.962155	0.0279458	E1BJ30, A6QLA0, A6QNT0, A0A0A8JC39, F1MPV5, E1BKK0, E1BLY0, F1ML06, E1BCL9, E1BMR0, Q0VCS4, F1MW46, G5E5H1, A6H7J1, F1N1F0	1083	97	13095	1.86981	1	0.616782	35.485
INTERPRO	IPR003959:ATPase, AAA-type, core	9	0.577293	0.0282091	A2VDN5, Q58DC8, A7YSY2, E1B8Q4, F1MWE0, E1BCE1, E1B8F6, A6QNN6, P62194	1411	44	16802	2.4357	1	0.437235	38.839
UP_KEYWORDS	Integrin	7	0.449006	0.0285462	E1B864, F1MBA3, F1MMN6, E1BNM2, P80747, P80746, E1BGA0	1470	29	17808	2.92414	0.999836	0.463492	32.1052
GOTERM_BP_DIRECT	GO:0086010~membrane depolarization during action potential	7	0.449006	0.0291136	F1N5T3, F1MSJ0, E1BMH1, F1MMU9, M5FK87, G3MYM1, A5PKI1	1190	28	13824	2.9042	1	0.919554	41.4346
GOTERM_BP_DIRECT	GO:0006357~regulation of transcription from RNA polymerase II promoter	31	1.98845	0.0294599	E1BEL3, F1MB52, Q0P5J0, F1MR87, E1BFC1, E1BGA9, E1B9T6, E1BJ63, E1BNL6, Q0VCT9, A1A4I4, Q32S26, Q9BDI3, A7MB60, A6QPH9, F1N1F0, G3X7K6, Q58DJ0, A7YW40, E1BDD9, Q5E9U0, E1BI11, F1MNB5, A6QLF6, E1BFW7, F1MBQ8, F1MTQ0, A5D7E9, A5D7M0, F1N4Z5, F1MMU3	1190	244	13824	1.47591	1	0.916548	41.8117
GOTERM_BP_DIRECT	GO:0048589~developmental growth	6	0.384862	0.0296763	F1N215, F1MCY1, F1MR77, F1MCE7, E1BKC4, A5PJK4	1190	21	13824	3.31909	1	0.912652	42.0463
GOTERM_BP_DIRECT	GO:0021915~neural tube development	6	0.384862	0.0296763	E1BJ31, Q4GZT3, F1MM55, E1BC86, F1MDL2, F1MP88	1190	21	13824	3.31909	1	0.912652	42.0463
KEGG_PATHWAY	bta00670:One carbon pool by folate	5	0.320718	0.0302338	A4FUD0, F1MF22, F1MNA6, Q4JIJ3, Q3SZ20	515	18	7550	4.07228	0.999689	0.553991	33.1022
GOTERM_MF_DIRECT	GO:0005248~voltage-gated sodium channel activity	5	0.320718	0.0302634	E1BIS4, Q4GZT3, E1BMH1, F1MMU9, G3MYM1	1083	15	13095	4.03047	1	0.632096	37.8229
INTERPRO	IPR003347:JmjC domain	7	0.449006	0.0307354	G3N346, F1MUR2, F1MV76, E1BLZ5, F1N685, F1MYV2, Q58CU3	1411	29	16802	2.87431	1	0.46255	41.5142
KEGG_PATHWAY	bta05414:Dilated cardiomyopathy	12	0.769724	0.0307814	E1BHU9, E1B864, P19754, F1MBA3, F1N5T3, F1MMN6, E1BNM2, F1MHZ1, F1N757, P80747, P80746, E1BGA0	515	86	7550	2.04561	0.999732	0.52646	33.5952
KEGG_PATHWAY	bta05200:Pathways in cancer	38	2.43746	0.0307922	F1N215, E1BHU9, Q2KJ94, F1MPJ6, Q1LZ97, P80746, F1MDD5, A6H727, F1N0T1, F1N759, F1MCY1, F1MBA3, F1MJ71, E1BFB4, F1MMT2, E1BPP7, F1MV51, F1MZU6, E1BI79, P19754, F1N2B6, F1MXG8, A6QNW5, Q3MHM6, A7Z067, E1BDK6, F1MYX9, F1MPV3, G3N2W8, F1MUY4, E1B9Q4, A6QQE3, Q7SIB2, F1MMW6, F1MEG3, F1MJ35, A5PJW9, E1B8X8	515	398	7550	1.39972	0.999732	0.496148	33.605
GOTERM_BP_DIRECT	GO:0007160~cell-matrix adhesion	11	0.705581	0.0308615	O18977, E1B864, F1MTV3, A7E306, F1MBA3, F1MMN6, E1BNM2, A7YY40, P80747, P80746, F1MJQ6	1190	60	13824	2.12975	1	0.915697	43.3148
GOTERM_BP_DIRECT	GO:0002244~hematopoietic progenitor cell differentiation	11	0.705581	0.0308615	A8E4N8, F1MIX6, Q9XT97, G3X6B2, F1MGK5, E1BHF6, E1B755, Q3SYU2, E1BFH4, Q0VCT9, E1BHM4	1190	60	13824	2.12975	1	0.915697	43.3148
INTERPRO	IPR000048:IQ motif, EF-hand binding site	13	0.833868	0.031346	E1BKQ6, F1MG13, E1BMH1, E1BNV7, A6H7H0, E1BP01, F1MMU9, F1MYE9, A6QPA6, Q9BE41, Q27991, F1MCM7, Q17R14	1411	79	16802	1.95952	1	0.465904	42.144
GOTERM_CC_DIRECT	GO:0048786~presynaptic active zone	5	0.320718	0.0317233	G3N354, A6QNV7, Q29397, E1BMN9, F1N415	1297	15	15461	3.97353	1	0.494108	37.9679
INTERPRO	IPR018184:Integrin alpha chain, C-terminal cytoplasmic region, conserved site	5	0.320718	0.0318455	F1MBA3, F1MMN6, E1BNM2, P80746, E1BGA0	1411	15	16802	3.96929	1	0.467988	42.6545
INTERPRO	IPR001609:Myosin head, motor domain	8	0.513149	0.0320055	E1BKQ6, F1MG13, E1BNV7, E1BP01, A6QPA6, Q9BE41, Q27991, Q17R14	1411	37	16802	2.57467	1	0.466424	42.8171
INTERPRO	IPR023415:Low-density lipoprotein (LDL) receptor class A, conserved site	8	0.513149	0.0320055	F1N6H1, A6QPB1, F1MER7, F1MDE1, F1MFJ4, E1BGJ0, E1BPZ1, E1BNK5	1411	37	16802	2.57467	1	0.466424	42.8171
SMART	SM00326:SH3	31	1.98845	0.03223	F1MB71, E1BMG8, E1BB46, G3X783, O97902, F1MSI9, F1MIX6, F1N657, F1MJ96, Q0P5B1, E1BKY4, E1BFB0, A6QPU2, G3N0J9, A7YWJ7, G3MZJ5, F1MXG8, Q0VC16, F1N7Q8, F1MQI3, F1MLS2, F1MG13, G5E618, E1BG80, F1MX23, Q08DK5, E1BIL8, A7MB08, A7MB57, E1BIJ3, F1MMQ8	985	189	8740	1.45538	1	0.426389	37.5434
GOTERM_MF_DIRECT	GO:0051018~protein kinase A binding	4	0.256575	0.0323721	E1BG86, O77797, F1MYH5, F1MP88	1083	9	13095	5.37396	1	0.643388	39.881
KEGG_PATHWAY	bta04070:Phosphatidylinositol signaling system	13	0.833868	0.0334192	F1MBU9, F1MNJ3, E1BKE7, E1B9E4, E1BGA9, E1BAU6, Q17QI9, F1N1U1, O02811, A7MBK3, F1MTE8, F1N2K7, A7Z050	515	98	7550	1.94472	0.999869	0.497245	35.9232
GOTERM_CC_DIRECT	GO:0002116~semaphorin receptor complex	4	0.256575	0.0336199	F1N4C5, E1BFR4, G3X755, E1B7F6	1297	9	15461	5.29804	1	0.502808	39.7435
GOTERM_CC_DIRECT	GO:0033270~paranode region of axon	4	0.256575	0.0336199	E1BNC9, E1BMH1, E1BLT3, F1MJQ2	1297	9	15461	5.29804	1	0.502808	39.7435
GOTERM_CC_DIRECT	GO:0031512~motile primary cilium	4	0.256575	0.0336199	F1N724, Q4GZT3, F1MCY1, E1BC86	1297	9	15461	5.29804	1	0.502808	39.7435
SMART	SM00015:IQ	11	0.705581	0.0336363	E1BKQ6, F1MG13, E1BMH1, E1BNV7, A6H7H0, E1BP01, F1MMU9, A6QPA6, Q27991, F1MCM7, Q17R14	985	47	8740	2.07668	1	0.429434	38.8349
KEGG_PATHWAY	bta04015:Rap1 signaling pathway	23	1.4753	0.0337198	E1BJ31, E1BHU9, P19754, E1BMG8, A7YWJ7, A6QNW5, A7Z067, F1N2X7, E1BHF6, Q28178, F1MXV4, E1BM96, F1MCL3, F1MTE8, E1B7L9, A5D7L3, F1N759, Q06807, F1MJ35, F1MDH3, P01317, F1MQI1, G5E6R9	515	214	7550	1.57563	0.999879	0.47501	36.1836
INTERPRO	IPR013548:Plexin, cytoplasmic RasGAP domain	4	0.256575	0.0337227	F1N4C5, E1BFR4, G3X755, E1B7F6	1411	9	16802	5.29239	1	0.481115	44.5353
GOTERM_BP_DIRECT	GO:0048839~inner ear development	7	0.449006	0.0341253	A5PJL8, A6QPB1, F1MJ26, F1MT22, E1BME7, E1B8H2, Q2KIV9	1190	29	13824	2.80406	1	0.930933	46.6738
GOTERM_MF_DIRECT	GO:0000977~RNA polymerase II regulatory region sequence-specific DNA binding	21	1.34702	0.0343037	E1B7A1, F1N694, F1MP14, A6QLA0, G3X7K6, E1B9T6, Q2KIA0, F1MDD8, F1MPV5, F1MTG6, F1MY77, E1BGD3, F1MR77, A4IFJ6, F1MS13, F1MIH1, E1BFT2, A2VDW9, F1MFP5, F1MFQ4, D2KFG0	1083	157	13095	1.61732	1	0.651688	41.7101
SMART	SM00004:NL	4	0.256575	0.0351553	G3X812, F1MPE9, F1N7Z6, E1BPT8	985	7	8740	5.07034	1	0.433338	40.2018
SMART	SM00281:LamB	4	0.256575	0.0351553	F1N0T1, F1MEG3, F1MER7, F1MMT2	985	7	8740	5.07034	1	0.433338	40.2018
SMART	SM00742:Hr1	4	0.256575	0.0351553	F1N4C8, E1BAW4, F1MFK1, A1A4I4	985	7	8740	5.07034	1	0.433338	40.2018
GOTERM_BP_DIRECT	GO:0007528~neuromuscular junction development	6	0.384862	0.035768	Q7SIB2, E1BPU0, E1BDK6, E1BKP7, F1MK99, F1MDF3	1190	22	13824	3.16822	1	0.935233	48.2926
GOTERM_CC_DIRECT	GO:0016605~PML body	11	0.705581	0.0357804	E1BC69, A6QQE3, Q2KJ94, E1BQ34, E1BLT3, E1BFB4, G3X684, E1BJC6, F1MQ85, E1BPS3, F1MLY7	1297	63	15461	2.08137	1	0.513489	41.7084
INTERPRO	IPR000253:Forkhead-associated (FHA) domain	7	0.449006	0.0357826	E1B8X2, E1B7A1, F1MP14, F1MP58, G3X690, G3X6H0, F1MD97	1411	30	16802	2.7785	1	0.498549	46.5322
INTERPRO	IPR016197:Chromo domain-like	7	0.449006	0.0357826	F1N734, E1BPM4, F1MNB5, F1N3F6, A3KN50, F1MGF2, F1N544	1411	30	16802	2.7785	1	0.498549	46.5322
INTERPRO	IPR002172:Low-density lipoprotein (LDL) receptor class A repeat	9	0.577293	0.0358502	F1N6H1, A6QPB1, F1N2I2, F1MER7, F1MDE1, F1MFJ4, E1BGJ0, E1BPZ1, E1BNK5	1411	46	16802	2.3298	1	0.495937	46.5966
GOTERM_BP_DIRECT	GO:0006606~protein import into nucleus	8	0.513149	0.0359115	F1MM55, E1B8Q9, A5PJZ5, E1BIX5, A5D7B3, F1N0J9, F1MH31, A6QM02	1190	37	13824	2.51174	1	0.931726	48.4317
GOTERM_BP_DIRECT	GO:0031641~regulation of myelination	4	0.256575	0.0359457	A6QP26, E1BFB4, Q2TBX0, P01267	1190	9	13824	5.16303	1	0.927616	48.4648
GOTERM_BP_DIRECT	GO:0045945~positive regulation of transcription from RNA polymerase III promoter	4	0.256575	0.0359457	F1N2B6, E1BFB4, Q0VCQ7, F1MS14	1190	9	13824	5.16303	1	0.927616	48.4648
GOTERM_BP_DIRECT	GO:0072001~renal system development	4	0.256575	0.0359457	E1B7B1, E1B864, A5PJZ5, E1B860	1190	9	13824	5.16303	1	0.927616	48.4648
GOTERM_BP_DIRECT	GO:0045995~regulation of embryonic development	4	0.256575	0.0359457	F1MEG3, F1MYX9, F1MMT2, E1BKC4	1190	9	13824	5.16303	1	0.927616	48.4648
GOTERM_BP_DIRECT	GO:0008104~protein localization	9	0.577293	0.0361322	E1BM51, E1BNK2, F1MB52, O77797, E1BB11, Q32PJ7, F1N1F1, A5D7T9, F1MDF3	1190	45	13824	2.32336	1	0.924301	48.6451
GOTERM_MF_DIRECT	GO:0016818~hydrolase activity, acting on acid anhydrides, in phosphorus-containing anhydrides	3	0.192431	0.0365663	F1N3F6, F1MLM2, F1N544	1083	4	13095	9.06856	1	0.662678	43.7864
INTERPRO	IPR000008:C2 calcium-dependent membrane targeting	20	1.28287	0.0365701	E1BH60, E1B7B1, F1MUK0, E1BBX9, E1BEA6, E1B886, E1BJB4, A0JN43, A2VE03, F1MFK1, A1A4I4, F1MTE8, A6QQP7, F1MF11, F1MBU9, F1MLS3, E1BGX7, E1BKY4, F1MK99, F1N415	1411	146	16802	1.63121	1	0.499694	47.2776
GOTERM_BP_DIRECT	GO:0007411~axon guidance	14	0.898012	0.0373658	E1BE71, F1N215, A7Z067, E1BDK6, F1N008, F1MKR1, F1N199, F1N279, E1BNC9, F1MCY1, F1N4X0, E1BPC9, F1MMT2, Q27991	1190	88	13824	1.84813	1	0.926667	49.8223
GOTERM_CC_DIRECT	GO:0008091~spectrin	3	0.192431	0.0375744	E1BLT3, F1MKE9, F1MMQ8	1297	4	15461	8.94044	1	0.51985	43.2945
GOTERM_CC_DIRECT	GO:0045180~basal cortex	3	0.192431	0.0375744	E1BGU2, Q4GZT3, F1MD97	1297	4	15461	8.94044	1	0.51985	43.2945
INTERPRO	IPR006605:G2 nidogen/fibulin G2F	3	0.192431	0.0376561	E1B9K4, A7E306, E1BE11	1411	4	16802	8.9309	1	0.506826	48.2895
INTERPRO	IPR010307:Laminin II	3	0.192431	0.0376561	F1MEG3, F1MYX9, F1MMT2	1411	4	16802	8.9309	1	0.506826	48.2895
INTERPRO	IPR009017:Green fluorescent protein	3	0.192431	0.0376561	E1B9K4, A7E306, E1BE11	1411	4	16802	8.9309	1	0.506826	48.2895
INTERPRO	IPR006558:LamG-like jellyroll fold	3	0.192431	0.0376561	F1N0A6, F1N7Z6, E1BP05	1411	4	16802	8.9309	1	0.506826	48.2895
INTERPRO	IPR009254:Laminin I	3	0.192431	0.0376561	F1MEG3, F1MYX9, F1MMT2	1411	4	16802	8.9309	1	0.506826	48.2895
INTERPRO	IPR027353:NET domain	3	0.192431	0.0376561	E1BNS3, Q32S26, F1MMU3	1411	4	16802	8.9309	1	0.506826	48.2895
INTERPRO	IPR010660:Notch, NOD domain	3	0.192431	0.0376561	G3X812, F1MPE9, E1BPT8	1411	4	16802	8.9309	1	0.506826	48.2895
INTERPRO	IPR011656:Notch, NODP domain	3	0.192431	0.0376561	G3X812, F1MPE9, E1BPT8	1411	4	16802	8.9309	1	0.506826	48.2895
SMART	SM00216:VWD	5	0.320718	0.0377149	F1N5T7, F1MTV3, F1N0R5, F2FB42, G5E5A7, F2FB40	985	12	8740	3.69712	1	0.446273	42.4411
SMART	SM00135:LY	5	0.320718	0.0377149	F1N6H1, A7E306, F1MDE1, E1BGJ0, E1BPZ1	985	12	8740	3.69712	1	0.446273	42.4411
SMART	SM00490:HELICc	19	1.21873	0.0379039	F1N734, A7Z027, F1MGC9, A5D786, A6QP73, E1BPM4, E1BMC0, F1MNU7, F1MLB1, F1MQ85, F1MLM2, F1MGF2, F1MBQ8, F1MX40, F1MEM4, E1BC33, F1N3F6, F1N544, A6QQR4	985	103	8740	1.63678	1	0.437914	42.6033
INTERPRO	IPR027359:Voltage-dependent potassium channel, four helix bundle domain	10	0.641437	0.0382582	Q4GZT3, Q52PG9, F1N5T3, F1MSJ0, E1BMH1, E1B7K3, F1MMU9, M5FK87, G3MYM1, F1MPV7	1411	55	16802	2.16507	1	0.509255	48.8426
UP_KEYWORDS	Sodium transport	10	0.641437	0.0385821	A7MBD8, Q9XS59, Q6R4Q5, E1BBL2, E1BMH1, F1MMU9, E1BB11, F1MU00, G3MYM1, Q3ZC26	1470	56	17808	2.16327	0.999993	0.545949	40.9065
INTERPRO	IPR017441:Protein kinase, ATP binding site	40	2.56575	0.0389763	E1BBM3, F1MIB7, E1BPU0, Q2KIP2, E1BC64, F1MKK7, A1A4I4, E1BP17, F1MAZ8, E1BC69, F1N759, F1MQJ7, E1B847, Q06807, E1BP01, F1MCE7, A6QP95, E1BIE4, F1N2J2, F1MFH7, E1BJ31, E1BB52, E1BQ34, F1MXG8, F1MYV9, A6QLV0, A7Z067, Q8WMV0, E1BKP7, G3N022, F1MFK1, F1MKR1, F1MC27, E1B7L9, F1MVF1, A7MB72, E1B9F9, E1BM19, A7MB57, E1BH35	1411	348	16802	1.36872	1	0.512695	49.4949
GOTERM_BP_DIRECT	GO:1904754~positive regulation of vascular associated smooth muscle cell migration	3	0.192431	0.039437	E1BMG8, F1N3L7, F1MJ73	1190	4	13824	8.71261	1	0.932914	51.7418
GOTERM_BP_DIRECT	GO:0071896~protein localization to adherens junction	3	0.192431	0.039437	F1N0Y1, F1MSI9, E1BKT9	1190	4	13824	8.71261	1	0.932914	51.7418
GOTERM_BP_DIRECT	GO:0060971~embryonic heart tube left/right pattern formation	3	0.192431	0.039437	F1MG59, E1BPS6, Q0VCT9	1190	4	13824	8.71261	1	0.932914	51.7418
GOTERM_BP_DIRECT	GO:0045053~protein retention in Golgi apparatus	3	0.192431	0.039437	E1BPX1, E1BIF6, E1BPZ1	1190	4	13824	8.71261	1	0.932914	51.7418
GOTERM_BP_DIRECT	GO:0009994~oocyte differentiation	3	0.192431	0.039437	F1MT22, E1BKN0, F1MTG6	1190	4	13824	8.71261	1	0.932914	51.7418
GOTERM_BP_DIRECT	GO:0031507~heterochromatin assembly	3	0.192431	0.039437	F1MM81, F1MSG4, E1BLK1	1190	4	13824	8.71261	1	0.932914	51.7418
GOTERM_BP_DIRECT	GO:0048752~semicircular canal morphogenesis	3	0.192431	0.039437	E1BPM4, F1MKX9, F1N264	1190	4	13824	8.71261	1	0.932914	51.7418
UP_SEQ_FEATURE	compositionally biased region:Poly-Ser	7	0.449006	0.039743	P02672, A6QLU6, F1MXS1, G1K1H0, D2KFG0, Q1RMS0, A5D7F6	270	59	6267	2.75386	1	0.866211	47.2755
SMART	SM00487:DEXDc	19	1.21873	0.0412138	F1N734, A7Z027, F1MGC9, A5D786, A6QP73, E1BPM4, E1BMC0, F1MNU7, F1MLB1, F1MQ85, F1MLM2, F1MGF2, F1MBQ8, F1MX40, F1MEM4, E1BC33, F1N3F6, F1N544, A6QQR4	985	104	8740	1.62105	1	0.456119	45.376
GOTERM_MF_DIRECT	GO:0005085~guanyl-nucleotide exchange factor activity	9	0.577293	0.0413741	Q17QV2, F1MIX6, E1BMG8, A6QNW5, F1MJ35, A7YY60, F1N3L7, F1MJ73, F1MTE8	1083	48	13095	2.26714	1	0.696257	47.9711
GOTERM_CC_DIRECT	GO:0030496~midbody	15	0.962155	0.0420401	A2VDN5, A6QP26, F1MF87, E1BL06, F1MFK1, E1BLZ4, A1A4I4, Q58CX9, A7MBG4, Q3T067, A3KMW7, F1MEA7, E1BE13, Q1RMU2, Q27991	1297	101	15461	1.77038	1	0.549689	47.0695
SMART	SM00408:IGc2	30	1.92431	0.0426717	F1MXS0, E1BC44, F1MY47, E1BAU3, F1N199, F1MPU4, F1N759, F1MNG8, F1MGX7, E1BPC9, E1BHM4, F1MLF3, E1BE71, E1BGL8, F1N4K6, G3N1H1, G3MZU6, F1MYJ5, A7Z067, E1BE11, E1BKP7, E1BDP0, G3N022, E1B9K4, F1N279, F1MZV0, A7MB72, F1MLS2, F1MER7, A6H7I1	985	186	8740	1.43114	1	0.458286	46.5574
KEGG_PATHWAY	bta04120:Ubiquitin mediated proteolysis	16	1.0263	0.0428687	E1BK00, A4FV03, A2VE03, F1N3I3, E1BNY9, E1BAB6, A7MBG4, A6QQE3, E1B7Q7, E1B847, E1BE13, E1B782, F1N0L2, A6QNS2, F1MNS0, E1BFD5	515	136	7550	1.72473	0.99999	0.536161	43.6582
GOTERM_BP_DIRECT	GO:0051056~regulation of small GTPase mediated signal transduction	5	0.320718	0.0429146	E1BP38, F1MCG4, E1BHF6, E1BNT2, F1MXV4	1190	16	13824	3.63025	1	0.944088	54.8095
GOTERM_BP_DIRECT	GO:0051966~regulation of synaptic transmission, glutamatergic	5	0.320718	0.0429146	Q9XT97, E1BPU0, Q2KIA0, E1B965, G3X783	1190	16	13824	3.63025	1	0.944088	54.8095
GOTERM_BP_DIRECT	GO:0061512~protein localization to cilium	5	0.320718	0.0429146	F1MG59, A7MB60, Q3T064, E1BH25, E1B860	1190	16	13824	3.63025	1	0.944088	54.8095
UP_SEQ_FEATURE	domain:Myosin head-like	3	0.192431	0.043308	Q9BE41, Q27991, Q17R14	270	8	6267	8.70417	1	0.876487	50.2817
UP_SEQ_FEATURE	metal ion-binding site:Magnesium; via carbonyl oxygen	3	0.192431	0.043308	Q0IIG5, Q2PC20, A5PJR4	270	8	6267	8.70417	1	0.876487	50.2817
SMART	SM00314:RA	8	0.513149	0.0450935	E1B8X2, E1BDB1, A6QNW5, E1BPM7, E1BGA9, E1BNV7, F1MTE8, G5E5D0	985	30	8740	2.36616	1	0.46773	48.4673
INTERPRO	IPR013809:Epsin-like, N-terminal	4	0.256575	0.0452324	F1MGT4, A7Z035, Q2KI44, F1N579	1411	10	16802	4.76315	1	0.563697	54.8561
INTERPRO	IPR001374:Single-stranded nucleic acid binding R3H	4	0.256575	0.0452324	E1B7R5, A6QLA0, E1BDH6, F1MNU7	1411	10	16802	4.76315	1	0.563697	54.8561
INTERPRO	IPR026791:Dedicator of cytokinesis	4	0.256575	0.0452324	F1MIX6, E1BMG8, F1N3L7, F1MJ73	1411	10	16802	4.76315	1	0.563697	54.8561
INTERPRO	IPR001426:Tyrosine-protein kinase, receptor class V, conserved site	4	0.256575	0.0452324	E1BJ31, F1MKR1, E1BIE4, F1MFH7	1411	10	16802	4.76315	1	0.563697	54.8561
INTERPRO	IPR016257:Tyrosine-protein kinase, ephrin receptor	4	0.256575	0.0452324	E1BJ31, F1MKR1, E1BIE4, F1MFH7	1411	10	16802	4.76315	1	0.563697	54.8561
INTERPRO	IPR003123:Vacuolar sorting protein 9	4	0.256575	0.0452324	A6QP75, A7YY60, G5E5D0, F1MDF3	1411	10	16802	4.76315	1	0.563697	54.8561
INTERPRO	IPR005821:Ion transport domain	15	0.962155	0.0455317	E1BIS4, E1BKE7, E1BLH0, Q52PG9, F1MSJ0, E1BPC8, E1B7K3, F1MPV7, F1N5T3, E1BMH1, F1MMU9, M5FK87, E1BMQ7, G3MYM1, A5PKI1	1411	102	16802	1.75116	1	0.562895	55.0987
GOTERM_CC_DIRECT	GO:0009986~cell surface	38	2.43746	0.0457566	Q9XT97, F1MPE9, E1BC86, F1MCT1, F1MY84, F1N199, P80747, E1B9J2, G3X812, A5PJQ2, G3MXP5, Q06807, P35071, E1BNM2, B2ZSR6, E1BPC9, A5PKI1, P51749, E1BJ31, E1B864, F1N4K6, E1BGJ5, F1ML75, G3X755, A7Z067, E1BDP0, F1MDL2, E1BI30, F1N279, F1N0A6, P08169, E1BCG1, F1MZX3, G1K1H0, E1BMN9, E1BI72, A5PJW9, F1MDE1	1297	332	15461	1.3644	1	0.5702	50.0311
UP_KEYWORDS	Antiport	5	0.320718	0.0460688	E1BBL2, E1BB11, Q4PKH3, F1MU00, Q58CV5	1470	17	17808	3.56303	0.999999	0.588221	46.7712
GOTERM_BP_DIRECT	GO:0030216~keratinocyte differentiation	8	0.513149	0.0462648	Q17QL6, E1BJ31, E1B9F9, F1MBB7, E1BKT9, P06394, E1B9N6, F1MDL2	1190	39	13824	2.38293	1	0.952687	57.5897
INTERPRO	IPR001073:Complement C1q protein	7	0.449006	0.0473952	A5PJL8, Q2KIX7, P23206, Q2KIV9, E1B7Z9, A7E303, E1BIR7	1411	32	16802	2.60485	1	0.574571	56.5813
GOTERM_BP_DIRECT	GO:0035909~aorta morphogenesis	4	0.256575	0.0481394	E1BLY0, E1BPM4, E1BPR4, F1MKX9	1190	10	13824	4.64672	1	0.955583	59.0741
GOTERM_BP_DIRECT	GO:0030889~negative regulation of B cell proliferation	4	0.256575	0.0481394	E1BJ30, E1BEI6, A7MBK3, A1A4I4	1190	10	13824	4.64672	1	0.955583	59.0741
GOTERM_BP_DIRECT	GO:0046597~negative regulation of viral entry into host cell	4	0.256575	0.0481394	Q0VCG9, G3MWR7, E1BJC6, G5E5S6	1190	10	13824	4.64672	1	0.955583	59.0741
GOTERM_CC_DIRECT	GO:0031410~cytoplasmic vesicle	17	1.09044	0.0484438	A2VDN5, A7Z063, Q9XT97, Q2TA45, Q1KZG5, A2VE03, E1BEQ5, P62194, Q17R14, F1N2K7, G5E5D0, Q08E20, A6QLI2, F1MEB4, E1B965, G3MY74, F1MDE1	1297	122	15461	1.66107	1	0.580922	52.0754
INTERPRO	IPR018297:Adenylyl cyclase class-3/4/guanylyl cyclase, conserved site	5	0.320718	0.0485929	E1BHU9, P19754, F1N5B2, E1BP75, P55203	1411	17	16802	3.50231	1	0.580676	57.5099
INTERPRO	IPR013649:Integrin alpha-2	5	0.320718	0.0485929	F1MBA3, F1MMN6, E1BNM2, P80746, E1BGA0	1411	17	16802	3.50231	1	0.580676	57.5099
KEGG_PATHWAY	bta00020:Citrate cycle (TCA cycle)	6	0.384862	0.0497098	Q58DR8, Q0QEX9, Q0VCU1, F1MWG1, P11966, Q04467	515	30	7550	2.93204	0.999998	0.567474	48.7094
GOTERM_BP_DIRECT	GO:0033344~cholesterol efflux	6	0.384862	0.0501075	E1BKP0, E1BCG1, F1N3K2, E1BNR0, G5E556, B0JYK2	1190	24	13824	2.9042	1	0.958462	60.5797
SMART	SM00028:TPR	20	1.28287	0.0511372	F1MXS1, E1BP93, G3N266, F1MF87, F1N4V2, F1MSK0, A7E3S8, Q08E34, G3X6E6, G3X746, E1BLC6, E1BIV7, A6H739, A7MB60, F1N4X0, E1BJI0, A6H7H2, F1MV76, F1N2F6, E1B885	985	114	8740	1.55668	1	0.502415	52.9603
SMART	SM00393:R3H	4	0.256575	0.0516297	E1B7R5, A6QLA0, E1BDH6, F1MNU7	985	8	8740	4.43655	1	0.496586	53.3099
GOTERM_BP_DIRECT	GO:0048812~neuron projection morphogenesis	7	0.449006	0.0523566	E1BPQ2, P02548, E1BPU0, F1MJQ2, A7YY60, E1BKJ6, F1MDF3	1190	32	13824	2.54118	1	0.961759	62.236
INTERPRO	IPR001245:Serine-threonine/tyrosine-protein kinase catalytic domain	18	1.15459	0.053136	E1BJ31, F1MIB7, F1MXG8, F1N5B2, Q3SZK6, A7Z067, E1BC64, E1BKP7, F1MKR1, F1MC27, F1N791, F1N759, F1N0U2, Q06807, P55203, A7MB57, E1BIE4, F1MFH7	1411	133	16802	1.61159	1	0.611063	60.8645
INTERPRO	IPR000569:HECT	6	0.384862	0.0535023	E1B7Q7, E1B782, A2VE03, F1N0L2, E1BNY9, F1MNS0	1411	25	16802	2.85789	1	0.610477	61.1239
GOTERM_CC_DIRECT	GO:0016324~apical plasma membrane	21	1.34702	0.0543477	F1N3K2, E1BP61, F1MKV7, A6QR57, F1MD88, F1N008, P48733, E1BEQ5, F1MU00, A7MBD8, E1B9J2, E1BK86, A5PJL8, F1MD59, Q0IIG5, F1N6H1, E1BCG1, E1BLT5, P35071, Q06807, E1BP05	1297	163	15461	1.53578	1	0.613846	56.296
GOTERM_BP_DIRECT	GO:0007409~axonogenesis	11	0.705581	0.0544882	A2VDN5, G3N1H6, F1MJ26, P19754, F1MGK5, F1MVZ2, E1BKY5, E1BDP0, F1N5L8, F1N3L7, E1B8X9	1190	66	13824	1.93613	1	0.964434	63.745
GOTERM_MF_DIRECT	GO:0043142~single-stranded DNA-dependent ATPase activity	4	0.256575	0.0561863	Q2KJ94, E1B8Q4, E1BMC0, E1BMP7	1083	11	13095	4.39688	1	0.793634	59.1048
UP_KEYWORDS	Sodium	10	0.641437	0.0562914	A7MBD8, Q9XS59, Q6R4Q5, E1BBL2, E1BMH1, F1MMU9, E1BB11, F1MU00, G3MYM1, Q3ZC26	1470	60	17808	2.01905	1	0.641505	53.912
GOTERM_BP_DIRECT	GO:0018105~peptidyl-serine phosphorylation	16	1.0263	0.0563802	E1BPU0, E1BC86, F1MFK1, A1A4I4, E1BP17, E1B7L9, F1N791, F1MLY7, E1BLB6, E1BC69, E1B9F9, F1MQJ7, F1MVZ2, F1MBL6, E1BFB4, F1N2J2	1190	112	13824	1.65954	1	0.966347	65.0365
GOTERM_MF_DIRECT	GO:0001077~transcriptional activator activity, RNA polymerase II core promoter proximal region sequence-specific binding	23	1.4753	0.0581476	E1BEL3, E1BIT4, F1N2B6, E1BME7, E1B9T6, E1BGZ6, Q2KIA0, A6QLQ3, F1MAZ9, E1BJR9, F1MLM2, F1MU46, Q0VBZ5, Q0VCF8, F1MCY1, A5D7C5, Q08DI0, E1BJ03, E1BFT2, D2KFG0, A6QPK5, Q05B92, F1CYZ1	1083	187	13095	1.48718	1	0.794803	60.3993
GOTERM_BP_DIRECT	GO:0001843~neural tube closure	10	0.641437	0.0582447	F1MCY2, F1N0Y1, F1MG59, A4FUD0, E1BPR4, G3X755, E1B925, F1MV76, F1MDE1, Q0VCT9	1190	58	13824	2.0029	1	0.968046	66.2666
GOTERM_CC_DIRECT	GO:0033276~transcription factor TFTC complex	4	0.256575	0.058245	A5PJW1, F1MME0, E1BKJ5, Q58DG7	1297	11	15461	4.33476	1	0.629989	58.8894
GOTERM_CC_DIRECT	GO:0035327~transcriptionally active chromatin	5	0.320718	0.0582591	F1N4V2, Q0VCQ7, E1B885, F1MS14, E1BCF6	1297	18	15461	3.31127	1	0.620272	58.8985
GOTERM_CC_DIRECT	GO:0008023~transcription elongation factor complex	5	0.320718	0.0582591	F1N4L4, Q0VCQ7, E1BIK3, F1MS14, E1BCF6	1297	18	15461	3.31127	1	0.620272	58.8985
UP_KEYWORDS	Kinase	48	3.0789	0.0583554	E1BGA9, Q2KIP2, Q29RI0, Q58DK4, F1MKK7, A1A4I4, E1BP17, F1MLY7, F1N791, E1BCS3, A7Z050, F1MBU9, Q0IIG5, F1N759, F1MQJ7, A6H768, E1B9E4, Q06807, F1MBL6, E1BFB4, O02811, F1MCE7, A6QP95, E1BIE4, A5D7T9, F1MFH7, E1BJ31, E1BB52, Q5E9Y9, F1MXG8, Q3SZK6, A7Z067, Q8WMV0, E1BKP7, G3N022, E1BEI6, F1MFK1, F1MKR1, Q17QF3, E1BLB6, E1B7L9, F1MVF1, F1MZV1, A7MB72, E1B9F9, Q3SZM9, Q17QV9, A7MB57	1470	452	17808	1.28647	1	0.634125	55.2416
GOTERM_BP_DIRECT	GO:0030901~midbrain development	6	0.384862	0.0583713	F1MSI9, E1B7H0, E1B9T6, F1MIH1, F1MDE1, E1BLZ5	1190	25	13824	2.78803	1	0.966276	66.3486
GOTERM_BP_DIRECT	GO:0043588~skin development	6	0.384862	0.0583713	E1B864, E1BC86, F1N740, G3MX98, A5D7P7, E1B8X9	1190	25	13824	2.78803	1	0.966276	66.3486
INTERPRO	IPR027007:DHR-1 domain	4	0.256575	0.0584139	F1MIX6, E1BMG8, F1N3L7, F1MJ73	1411	11	16802	4.33013	1	0.640565	64.4484
INTERPRO	IPR027357:DHR-2 domain	4	0.256575	0.0584139	F1MIX6, E1BMG8, F1N3L7, F1MJ73	1411	11	16802	4.33013	1	0.640565	64.4484
INTERPRO	IPR001090:Ephrin receptor ligand binding domain	4	0.256575	0.0584139	E1BJ31, F1MKR1, E1BIE4, F1MFH7	1411	11	16802	4.33013	1	0.640565	64.4484
INTERPRO	IPR010703:Dedicator of cytokinesis C-terminal	4	0.256575	0.0584139	F1MIX6, E1BMG8, F1N3L7, F1MJ73	1411	11	16802	4.33013	1	0.640565	64.4484
INTERPRO	IPR001054:Adenylyl cyclase class-3/4/guanylyl cyclase	5	0.320718	0.0584684	E1BHU9, P19754, F1N5B2, E1BP75, P55203	1411	18	16802	3.30774	1	0.637788	64.4837
INTERPRO	IPR013519:Integrin alpha beta-propellor	5	0.320718	0.0584684	F1MBA3, F1MMN6, E1BNM2, P80746, E1BGA0	1411	18	16802	3.30774	1	0.637788	64.4837
UP_KEYWORDS	Protein phosphatase	12	0.769724	0.0590072	Q1KZG2, E1BFE2, E1BEZ8, Q2PC20, F1MGK5, E1BIH4, F1MKX9, E1B755, F1N008, F1N6W1, E1BPU9, E1BJR7	1470	79	17808	1.84014	1	0.61845	55.654
GOTERM_CC_DIRECT	GO:1990909~Wnt signalosome	3	0.192431	0.059181	F1MMW6, E1BPU0, F1MDE1	1297	5	15461	7.15235	1	0.616672	59.4905
INTERPRO	IPR003367:Thrombospondin, type 3-like repeat	3	0.192431	0.0593054	A6QQT1, Q28178, Q95116	1411	5	16802	7.14472	1	0.640074	65.0223
INTERPRO	IPR002100:Transcription factor, MADS-box	3	0.192431	0.0593054	Q2KIA0, D2KFG0, F1CYZ1	1411	5	16802	7.14472	1	0.640074	65.0223
INTERPRO	IPR008859:Thrombospondin, C-terminal	3	0.192431	0.0593054	A6QQT1, Q28178, Q95116	1411	5	16802	7.14472	1	0.640074	65.0223
INTERPRO	IPR017897:Thrombospondin, type 3 repeat	3	0.192431	0.0593054	A6QQT1, Q28178, Q95116	1411	5	16802	7.14472	1	0.640074	65.0223
INTERPRO	IPR024678:Serine/threonine-protein kinase OSR1/WNK, CCT domain	3	0.192431	0.0593054	E1BM51, G3X788, F1MYV9	1411	5	16802	7.14472	1	0.640074	65.0223
INTERPRO	IPR008366:Nuclear factor of activated T cells (NFAT)	3	0.192431	0.0593054	G3XCF6, A6QNT0, F1MAZ9	1411	5	16802	7.14472	1	0.640074	65.0223
INTERPRO	IPR010439:Calcium-dependent secretion activator	3	0.192431	0.0593054	E1BBX9, Q1KZG5, F1MK99	1411	5	16802	7.14472	1	0.640074	65.0223
GOTERM_BP_DIRECT	GO:0002062~chondrocyte differentiation	7	0.449006	0.0595306	Q32S24, F1MCY1, E1BIT4, P02459, Q2KIA0, F1MCE7, F1CYZ1	1190	33	13824	2.46417	1	0.96657	67.0909
UP_SEQ_FEATURE	short sequence motif:Nuclear localization signal	8	0.513149	0.0613138	A5D7E9, A2VDN5, Q5W9D7, G3XCF6, Q32S26, Q3B7N9, Q08DI0, Q9GMA3	270	82	6267	2.2645	1	0.942334	63.1638
GOTERM_CC_DIRECT	GO:0070062~extracellular exosome	201	12.8929	0.0616001	E1B876, F1MLE1, E1BB46, A7YW98, A7MBJ5, Q3B7N2, E1B9R3, E1BEN4, A6QM01, Q58CV5, F1MDH3, Q3SYU2, E1B7W1, E1BFD5, F1N0Y1, E1B864, O77588, E1BJV1, G3MX98, F1MTK6, F1MF78, Q17R14, E1BC50, A6QQP7, Q2T9X2, Q0QEX9, G3N3E1, E1B7E3, E1BP91, Q95JC7, A5PJV4, Q6XUI1, F1N199, Q3MI00, F1MW38, E1BFV0, E1BDK6, A2VE63, P56701, E1B748, Q4GZT3, F1MD59, A5D7M0, E1BNA2, P06394, F1MRY9, E1BH94, G3X687, E1BC86, Q58DR8,…	1297	2162	15461	1.10825	1	0.622562	61.0063
GOTERM_BP_DIRECT	GO:0051444~negative regulation of ubiquitin-protein transferase activity	3	0.192431	0.0620223	Q9XT97, F1MXG8, E1BC64	1190	5	13824	6.97008	1	0.969318	68.6346
GOTERM_BP_DIRECT	GO:0048496~maintenance of organ identity	3	0.192431	0.0620223	E1BP93, F1N0A6, E1BP05	1190	5	13824	6.97008	1	0.969318	68.6346
GOTERM_BP_DIRECT	GO:0035418~protein localization to synapse	3	0.192431	0.0620223	G5E618, E1BMN9, F1N415	1190	5	13824	6.97008	1	0.969318	68.6346
GOTERM_BP_DIRECT	GO:0010738~regulation of protein kinase A signaling	4	0.256575	0.0620728	O77797, E1BM36, E1BPU0, F1MYH5	1190	11	13824	4.22429	1	0.967545	68.6651
GOTERM_BP_DIRECT	GO:0035385~Roundabout signaling pathway	4	0.256575	0.0620728	F1N279, E1BE71, E1BNV7, F1N199	1190	11	13824	4.22429	1	0.967545	68.6651
GOTERM_BP_DIRECT	GO:0021670~lateral ventricle development	4	0.256575	0.0620728	A7E318, E1BJB4, Q27991, E1BLZ5	1190	11	13824	4.22429	1	0.967545	68.6651
GOTERM_BP_DIRECT	GO:0032897~negative regulation of viral transcription	4	0.256575	0.0620728	P53781, G3MWR7, E1BJC6, G5E5S6	1190	11	13824	4.22429	1	0.967545	68.6651
GOTERM_BP_DIRECT	GO:0051591~response to cAMP	4	0.256575	0.0620728	Q0VBZ5, Q9BDI3, E1BPP7, F1MDK3	1190	11	13824	4.22429	1	0.967545	68.6651
GOTERM_MF_DIRECT	GO:0004672~protein kinase activity	18	1.15459	0.0625182	Q0P5I2, F1MIB7, E1BQ34, F1N5B2, Q3SZK6, A6QLV0, F1MP49, Q29RI0, E1BC64, F1MKK7, F1MC27, F1MQJ7, F1N0U2, E1BM19, E1BP01, P55203, F1MFH7, F1MM88	1083	138	13095	1.57714	1	0.808914	63.1474
GOTERM_BP_DIRECT	GO:0042384~cilium assembly	14	0.898012	0.0628056	G3N0U5, E1BBM3, E1BKZ0, F1MB52, E1BJB4, E1BC93, F1MDL2, E1B860, E1BK86, F1MNI1, A6H739, F1MG59, F1MHH5, F1N4X0	1190	95	13824	1.71195	1	0.967021	69.1055
GOTERM_BP_DIRECT	GO:0001656~metanephros development	5	0.320718	0.0629739	F1N215, A2VDX5, F1MKX9, E1BNM2, Q3T0I2	1190	18	13824	3.22689	1	0.965446	69.2058
GOTERM_CC_DIRECT	GO:0005903~brush border	8	0.513149	0.0646778	E1BHC8, Q3SZP7, F1MKV7, F1N365, Q27991, Q3B7N2, A6H742, Q17R14	1297	43	15461	2.21778	1	0.632011	62.8583
SMART	SM01338:SM01338	3	0.192431	0.0650784	G3X812, F1MPE9, E1BPT8	985	4	8740	6.65482	1	0.572124	61.9718
SMART	SM00560:LamGL	3	0.192431	0.0650784	F1N0A6, F1N7Z6, E1BP05	985	4	8740	6.65482	1	0.572124	61.9718
SMART	SM01339:SM01339	3	0.192431	0.0650784	G3X812, F1MPE9, E1BPT8	985	4	8740	6.65482	1	0.572124	61.9718
SMART	SM00682:G2F	3	0.192431	0.0650784	E1B9K4, A7E306, E1BE11	985	4	8740	6.65482	1	0.572124	61.9718
UP_SEQ_FEATURE	site:Stutter	4	0.256575	0.0659407	Q29S21, P06394, P08728, A4FV94	270	22	6267	4.2202	1	0.947248	65.9275
SMART	SM00105:ArfGap	6	0.384862	0.0660429	O97902, A3KMY6, Q2TA45, E1BIQ2, E1BB02, Q5EA00	985	20	8740	2.66193	1	0.56846	62.5316
KEGG_PATHWAY	bta01200:Carbon metabolism	13	0.833868	0.0661918	Q58DR8, Q0IIG5, F1MZV1, Q0QEX9, F1ML89, F1MF22, Q0VCU1, F1MWG1, P11966, Q58DK4, Q04467, Q3SZ20, Q08E20	515	109	7550	1.74846	1	0.653368	59.2114
GOTERM_CC_DIRECT	GO:0005911~cell-cell junction	15	0.962155	0.0670314	F1MXE0, F1MPJ6, E1BJB4, Q29397, A2VE02, A7YY40, E1BM96, F1N2K7, G5E5X0, Q4GZT3, Q06807, A6H7H0, G3MY74, Q9BE41, G3N3E1	1297	108	15461	1.65564	1	0.636753	64.2189
GOTERM_MF_DIRECT	GO:0016301~kinase activity	10	0.641437	0.067273	F1MBL6, E1BFB4, Q29RI0, E1BKJ5, O02811, E1BEI6, Q17QF3, A5D7T9, E1BLB6, F1MLY7	1083	62	13095	1.95023	1	0.823225	65.934
GOTERM_BP_DIRECT	GO:0010508~positive regulation of autophagy	6	0.384862	0.0673651	F1MSJ0, E1BPU0, E1BB46, E1BJC6, G5E5S6, E1BP17	1190	26	13824	2.6808	1	0.971277	71.7169
GOTERM_BP_DIRECT	GO:0006099~tricarboxylic acid cycle	6	0.384862	0.0673651	Q58DR8, Q0QEX9, Q0VCU1, F1MWG1, P11966, Q04467	1190	26	13824	2.6808	1	0.971277	71.7169
INTERPRO	IPR008266:Tyrosine-protein kinase, active site	13	0.833868	0.0680368	E1BJ31, F1MIB7, F1MXG8, A7Z067, E1BKP7, F1MKR1, F1MC27, A7MB72, F1N759, Q06807, A7MB57, E1BIE4, F1MFH7	1411	89	16802	1.73935	1	0.688983	70.2007
GOTERM_CC_DIRECT	GO:0016328~lateral plasma membrane	7	0.449006	0.0684081	E1BNC9, A5PJL8, F1MEA7, A6H7H0, Q3B7N4, F1N008, Q3B7N2	1297	35	15461	2.38412	1	0.635844	64.9931
GOTERM_BP_DIRECT	GO:0090090~negative regulation of canonical Wnt signaling pathway	13	0.833868	0.0684957	F1N215, E1BP93, E1BI79, F1N008, F1N371, F1MP88, G5E5X0, E1BG86, Q32LC7, A6H727, E1B9F9, Q1RMU2, F1MV51	1190	87	13824	1.73584	1	0.971404	72.3314
GOTERM_CC_DIRECT	GO:0009925~basal plasma membrane	5	0.320718	0.0690838	E1BNC9, Q4GZT3, E1BP61, Q06807, F1MD88	1297	19	15461	3.137	1	0.631135	65.3673
GOTERM_CC_DIRECT	GO:0008305~integrin complex	5	0.320718	0.0690838	E1B864, F1MBA3, E1BNM2, P80747, P80746	1297	19	15461	3.137	1	0.631135	65.3673
INTERPRO	IPR008271:Serine/threonine-protein kinase, active site	33	2.11674	0.0696114	E1BBM3, G3X788, E1BPU0, A1A4I4, F1MKK7, E1BP17, F1MAZ8, F1N791, E1BC69, E1B847, F1MQJ7, F1MVZ2, F1MCE7, A6QP95, F1N2J2, E1BB52, E1BQ34, Q3SZK6, A6QLV0, Q8WMV0, G3N022, F1MFK1, E1B7L9, F1MVF1, E1BM51, E1B9F9, A7MB72, F1MLS2, E1BM19, F1N0U2, Q17QV9, E1BH35, F1MM88	1411	291	16802	1.35038	1	0.694575	71.0541
KEGG_PATHWAY	bta05222:Small cell lung cancer	11	0.705581	0.0704047	F1N0T1, Q7SIB2, F1MEG3, F1MBA3, E1BDK6, F1MJ71, F1MYX9, F1MMT2, F1MZU6, P80746, F1MDD5	515	87	7550	1.85359	1	0.655857	61.5564
KEGG_PATHWAY	bta04530:Tight junction	11	0.705581	0.0704047	A5D7L3, F1MEC0, E1BJF6, F1N2X7, Q3B7N4, A6QPA6, Q9BE41, Q27991, Q3B7N2, E1BEQ5, A6H7I2	515	87	7550	1.85359	1	0.655857	61.5564
GOTERM_MF_DIRECT	GO:0017154~semaphorin receptor activity	4	0.256575	0.070453	F1N4C5, E1BFR4, G3X755, E1B7F6	1083	12	13095	4.03047	1	0.82897	67.6862
INTERPRO	IPR008942:ENTH/VHS	6	0.384862	0.0708822	F1MGT4, A7Z035, F1MTX3, Q2KI44, F1MEP7, F1N579	1411	27	16802	2.64619	1	0.698388	71.726
INTERPRO	IPR003960:ATPase, AAA-type, conserved site	6	0.384862	0.0708822	A2VDN5, A7YSY2, F1MWE0, E1B8F6, A6QNN6, P62194	1411	27	16802	2.64619	1	0.698388	71.726
SMART	SM00273:ENTH	4	0.256575	0.0711277	F1MGT4, A7Z035, Q2KI44, F1N579	985	9	8740	3.9436	1	0.587454	65.3583
KEGG_PATHWAY	bta00310:Lysine degradation	8	0.513149	0.0718912	O77588, E1BKN0, Q2KHZ9, F1MFD2, E1BLX2, F1N6Y5, F1MWG1, A5PK45	515	54	7550	2.17188	1	0.643959	62.3536
INTERPRO	IPR008983:Tumour necrosis factor-like domain	9	0.577293	0.0730645	P51749, A5PJL8, Q2KIX7, P23206, Q2KIV9, E1B7Z9, A7E303, E1BIR7, E1BH25	1411	53	16802	2.02209	1	0.706798	72.8456
INTERPRO	IPR009080:Aminoacyl-tRNA synthetase, class 1a, anticodon-binding	4	0.256575	0.0731747	A7MBC5, A7YW98, Q2T9L8, Q0P5H7	1411	12	16802	3.96929	1	0.704447	72.901
INTERPRO	IPR015359:Phospholipase C, phosphoinositol-specific, EF-hand-like	4	0.256575	0.0731747	E1BH60, F1MF11, F1MLS3, F1MTE8	1411	12	16802	3.96929	1	0.704447	72.901
GOTERM_MF_DIRECT	GO:0004674~protein serine/threonine kinase activity	25	1.60359	0.0738879	G3X788, Q2KIP2, F1MKK7, A1A4I4, E1BP17, F1MLY7, F1MAZ8, E1BC69, F1MQJ7, F1MBL6, F1MVZ2, E1BFB4, A6QP95, F1N2J2, Q0P5I2, Q3SZK6, F1MFK1, G3N022, E1B7L9, E1BM51, A7MB72, E1B9F9, F1MLS2, Q17QV9, E1BH35	1083	213	13095	1.41918	1	0.835338	69.4841
GOTERM_BP_DIRECT	GO:0090103~cochlea morphogenesis	5	0.320718	0.0745504	F1MMW6, F1MCY1, F1MKX9, G3N2W8, F1N264	1190	19	13824	3.05705	1	0.978083	75.4131
GOTERM_BP_DIRECT	GO:0001932~regulation of protein phosphorylation	5	0.320718	0.0745504	A6QQE3, Q2KJ94, G3X755, F1MHH5, Q3T064	1190	19	13824	3.05705	1	0.978083	75.4131
GOTERM_BP_DIRECT	GO:0030534~adult behavior	5	0.320718	0.0745504	G3MXP5, G5E618, G1K1H0, E1B8X9, E1BAU4	1190	19	13824	3.05705	1	0.978083	75.4131
GOTERM_BP_DIRECT	GO:0045666~positive regulation of neuron differentiation	9	0.577293	0.0747191	F1N6R4, F1MCY1, E1BME7, A2VDX5, F1MNS7, Q08DF2, Q2KIA0, A6QPK5, F1N264	1190	52	13824	2.0106	1	0.976961	75.4942
INTERPRO	IPR001660:Sterile alpha motif domain	12	0.769724	0.0752013	F1MB71, E1BJ31, E1BKW5, G5E618, E1BEZ3, F1MNU9, E1BKK6, F1MKR1, E1BIJ3, E1BIE4, F1MFH7, E1BBZ3	1411	81	16802	1.76413	1	0.711767	73.9013
SMART	SM00558:JmjC	7	0.449006	0.0754015	G3N346, F1MUR2, F1MV76, E1BLZ5, F1N685, F1MYV2, Q58CU3	985	27	8740	2.30043	1	0.600823	67.5792
SMART	SM00303:GPS	7	0.449006	0.0754015	F1N570, F1MK80, A6QLU6, F1MHH5, E1BC86, F1ME74, G3MZX5	985	27	8740	2.30043	1	0.600823	67.5792
INTERPRO	IPR013087:Zinc finger C2H2-type/integrase DNA-binding domain	44	2.82232	0.0754621	F1N215, E1BPQ2, F1MV30, A6QNV5, F1MPW8, F1MZB7, E1B706, E1BCS5, F1N264, F1MLP0, F1N281, F1ML21, E1B842, A6H727, A0JNJ4, E1BGD3, F1MCY1, E1BCL9, A4IFJ6, A2VDW9, D0VZF8, A6H7J1, F1MFQ4, A6QPM3, E1BN44, E1BPM6, Q2TA17, G3X834, E1BJ30, A0A0A8JC39, E1BBV0, Q5E9U0, E1BCA0, A5PJY6, A6QQ84, E1BJR9, F1MI25, G3N351, E1BNL0, F1MDR1, Q3B7N9, E1BMR6, F1N4Z5, F1MW46	1411	410	16802	1.27792	1	0.710201	74.0275
GOTERM_BP_DIRECT	GO:0007368~determination of left/right symmetry	7	0.449006	0.0755453	F1N724, Q32KS2, E1B8W3, E1BJB4, F1MCT1, E1BG09, E1B860	1190	35	13824	2.32336	1	0.976627	75.8874
GOTERM_BP_DIRECT	GO:0033962~cytoplasmic mRNA processing body assembly	4	0.256575	0.0776404	G5E5X0, E1BEA2, E1BDX8, E1BE88	1190	12	13824	3.87227	1	0.977785	76.858
GOTERM_BP_DIRECT	GO:0001829~trophectodermal cell differentiation	4	0.256575	0.0776404	Q0VBZ5, F1N4V2, E1BCS1, Q0VCT9	1190	12	13824	3.87227	1	0.977785	76.858
GOTERM_BP_DIRECT	GO:1902287~semaphorin-plexin signaling pathway involved in axon guidance	4	0.256575	0.0776404	F1N4C5, E1BFR4, G3X755, E1B7F6	1190	12	13824	3.87227	1	0.977785	76.858
GOTERM_BP_DIRECT	GO:0008340~determination of adult lifespan	4	0.256575	0.0776404	E1BPU0, E1BEI6, A7MBK3, E1B9Q4	1190	12	13824	3.87227	1	0.977785	76.858
KEGG_PATHWAY	bta05217:Basal cell carcinoma	8	0.513149	0.0777987	F1N215, A6H727, F1MMW6, E1BI79, F1MCY1, G3N2W8, F1MV51, A5PJW9	515	55	7550	2.13239	1	0.655286	65.3734
GOTERM_BP_DIRECT	GO:0030335~positive regulation of cell migration	17	1.09044	0.0781565	E1BG65, Q3SX26, F1MTM9, E1BBV0, A6QLV1, A7Z067, F1MJE0, F1MF78, P80746, F1N371, E1B8J6, P02453, E1BE15, Q3SZP7, A6H7J1, Q3T0I2, F1MFH7	1190	127	13824	1.55501	1	0.977108	77.0914
UP_SEQ_FEATURE	zinc finger region:C2H2-type 4	5	0.320718	0.078264	Q2TA17, A0JNJ4, Q3B7N9, A4IFJ6, A6H7J1	270	38	6267	3.05409	1	0.965559	72.3709
INTERPRO	IPR002219:Protein kinase C-like, phorbol ester/diacylglycerol binding	10	0.641437	0.0789311	E1BBX9, E1B9E4, E1BGA9, E1BNV7, F1MJ35, E1BGX7, F1MK99, A6QP95, Q1LZ97, E1B7L9	1411	63	16802	1.89014	1	0.724092	75.652
INTERPRO	IPR014756:Immunoglobulin E-set	14	0.898012	0.0796227	F1N4C5, G3XCF6, E1B7B1, E1BH40, A6QNT0, G3X755, F1MAZ9, E1BAA2, E1BE25, E1BK86, F1MBB7, E1BFR4, E1BFT2, E1B7F6	1411	101	16802	1.6506	1	0.724537	75.9643
INTERPRO	IPR000571:Zinc finger, CCCH-type	9	0.577293	0.0797774	A1A4K6, A5D7H8, E1BC96, P53781, A6QP09, F1MCW9, E1BAA5, E1BF96, Q2YDG6	1411	54	16802	1.98464	1	0.72249	76.0336
INTERPRO	IPR027267:Arfaptin homology (AH) domain/BAR domain	6	0.384862	0.0806008	O97902, A3KMY6, F1MJ96, F1MX23, Q08DK5, E1BIL8	1411	28	16802	2.55169	1	0.723552	76.3994
GOTERM_CC_DIRECT	GO:0016607~nuclear speck	16	1.0263	0.0810201	F1N215, E1BB52, E1BQ34, Q1LZD9, E1BGA9, F1MLB1, Q2KIA0, A4FUD3, A5D7B8, F1MQG6, F1MCY1, E1B7W1, A4IFR1, G3MXN4, F1MI03, A5D7F6	1297	121	15461	1.57628	1	0.683666	71.3933
INTERPRO	IPR000313:PWWP	5	0.320718	0.0811397	A4FUF0, F1MD29, F1MKS1, E1B9Q4, F1MY77	1411	20	16802	2.97697	1	0.7233	76.636
UP_KEYWORDS	WD repeat	16	1.0263	0.0814684	F1MLZ5, F1MK51, Q32KS2, E1BJG3, A3KMV1, E1BC63, E1B860, F1MNF4, A5D7H2, Q9XSC3, Q58DC2, Q9TTK4, E1BJ01, G3X6I6, F1N1R8, F1N406	1470	123	17808	1.57584	1	0.721666	67.8948
GOTERM_BP_DIRECT	GO:0030198~extracellular matrix organization	11	0.705581	0.0814838	F1N694, O18977, G3N319, E1BP93, E1B818, P02459, A5PJN2, E1BNM2, A3KN33, E1BCE6, F1MTP1	1190	71	13824	1.79979	1	0.979506	78.5433
GOTERM_MF_DIRECT	GO:0005543~phospholipid binding	8	0.513149	0.0816685	F1MUS9, A6QQP7, F1MTM9, E1BLT3, F1MKE9, E1BNR0, E1BPS3, F1MG90	1083	46	13095	2.10285	1	0.857443	73.2164
GOTERM_BP_DIRECT	GO:0030324~lung development	9	0.577293	0.0817044	F1N215, A6H727, E1BP93, F1MCY1, F1MXE0, P29473, E1BJ63, F1MCE7, E1BJR9	1190	53	13824	1.97267	1	0.978569	78.6365
KEGG_PATHWAY	bta04919:Thyroid hormone signaling pathway	13	0.833868	0.0820406	G3X812, F1MM56, F1MQJ7, F1MPE9, E1BFB4, F1MPU1, E1BPY4, E1BPP7, E1BPT8, E1BNT2, F1MVD0, P80746, F1MTE8	515	113	7550	1.68657	1	0.657699	67.402
GOTERM_BP_DIRECT	GO:0010468~regulation of gene expression	10	0.641437	0.0820854	F1MX40, A5PJQ2, A7E318, F1MYW1, F1MD29, P02459, F1MN54, A6H7J1, Q17QV9, G3MYB9	1190	62	13824	1.87368	1	0.977791	78.7964
UP_KEYWORDS	Homeobox	23	1.4753	0.0825731	G3N3S1, F1N693, E1BEL1, A6QLL3, E1BME7, A2VDX5, E1B9T6, A4IF73, F1MPW8, F1MKX5, E1BAD7, E1BE33, F1N264, F1MU46, A8KC64, F1MR77, A5D7C5, Q0VCS4, F1MM89, Q9GMA3, E1BJ03, F1MIH1, G3MYB9	1470	195	17808	1.42886	1	0.709247	68.4072
GOTERM_CC_DIRECT	GO:0005587~collagen type IV trimer	3	0.192431	0.083928	Q7SIB2, F1MJ71, F1MZU6	1297	6	15461	5.96029	1	0.689064	72.7052
GOTERM_CC_DIRECT	GO:0001939~female pronucleus	3	0.192431	0.083928	P30274, A7MB37, E1BCK1	1297	6	15461	5.96029	1	0.689064	72.7052
UP_KEYWORDS	Motor protein	12	0.769724	0.0839742	E1BBY6, Q32KS2, E1BKQ6, E1BNV7, F1MJ53, E1BP01, E1B715, A6QPA6, Q9BE41, Q27991, A6QPE8, Q17R14	1470	84	17808	1.73061	1	0.698819	69.0462
UP_SEQ_FEATURE	compositionally biased region:Glu/Ser-rich	2	0.128287	0.0840106	Q32S26, Q32PG1	270	2	6267	23.2111	1	0.969252	74.968
UP_SEQ_FEATURE	domain:MADS-box	2	0.128287	0.0840106	Q2KIA0, D2KFG0	270	2	6267	23.2111	1	0.969252	74.968
UP_SEQ_FEATURE	DNA-binding region:Mef2-type	2	0.128287	0.0840106	Q2KIA0, D2KFG0	270	2	6267	23.2111	1	0.969252	74.968
INTERPRO	IPR006896:Sec23/Sec24, trunk domain	3	0.192431	0.0840986	E1BPR4, Q3SZN2, F1MV07	1411	6	16802	5.95393	1	0.733848	77.8956
INTERPRO	IPR006895:Zinc finger, Sec23/Sec24-type	3	0.192431	0.0840986	E1BPR4, Q3SZN2, F1MV07	1411	6	16802	5.95393	1	0.733848	77.8956
INTERPRO	IPR003126:Zinc finger, N-recognin	3	0.192431	0.0840986	E1BHT5, F1N0L2, E1BCW1	1411	6	16802	5.95393	1	0.733848	77.8956
INTERPRO	IPR006900:Sec23/Sec24, helical domain	3	0.192431	0.0840986	E1BPR4, Q3SZN2, F1MV07	1411	6	16802	5.95393	1	0.733848	77.8956
INTERPRO	IPR001442:Collagen IV, non-collagenous	3	0.192431	0.0840986	Q7SIB2, F1MJ71, F1MZU6	1411	6	16802	5.95393	1	0.733848	77.8956
INTERPRO	IPR014837:EF-hand, Ca insensitive	3	0.192431	0.0840986	Q3B7N2, E1BFB0, F1MMQ8	1411	6	16802	5.95393	1	0.733848	77.8956
INTERPRO	IPR001605:Pleckstrin homology domain, spectrin-type	3	0.192431	0.0840986	F1MUS9, E1BLT3, F1MKE9	1411	6	16802	5.95393	1	0.733848	77.8956
INTERPRO	IPR012990:Sec23/Sec24 beta-sandwich	3	0.192431	0.0840986	E1BPR4, Q3SZN2, F1MV07	1411	6	16802	5.95393	1	0.733848	77.8956
GOTERM_BP_DIRECT	GO:0009566~fertilization	7	0.449006	0.0843819	F1MV84, F1MUD3, E1B8X1, E1BLT3, E1BNR0, F1MGY6, F1N2F6	1190	36	13824	2.25882	1	0.97902	79.7367
GOTERM_MF_DIRECT	GO:0046332~SMAD binding	4	0.256575	0.0861611	P02465, G5E5H1, D2KFG0, Q0VCT9	1083	13	13095	3.72043	1	0.865465	75.1723
KEGG_PATHWAY	bta04340:Hedgehog signaling pathway	5	0.320718	0.0861636	F1N215, F1N6H1, A6H727, F1MCY1, A5PJW9	515	25	7550	2.93204	1	0.659435	69.268
GOTERM_BP_DIRECT	GO:0006366~transcription from RNA polymerase II promoter	17	1.09044	0.0871052	G3MZY8, A6QLA0, A0A0A8JC39, E1BCA0, Q2KIA0, F1MPV5, F1MTG6, F1MI25, A5D7E9, Q0VBZ5, E1B842, F1MDR1, E1BCL9, F1MW46, Q08DI0, D2KFG0, E1BN44	1190	129	13824	1.5309	1	0.980552	80.8008
GOTERM_BP_DIRECT	GO:0018149~peptide cross-linking	5	0.320718	0.0871174	E1BCG1, F1MBB7, E1BKT9, E1B9N6, Q28178	1190	20	13824	2.9042	1	0.9795	80.8054
GOTERM_BP_DIRECT	GO:0003281~ventricular septum development	5	0.320718	0.0871174	A7YY58, F1N6H1, E1BJ30, F1MXE0, E1BH37	1190	20	13824	2.9042	1	0.9795	80.8054
GOTERM_BP_DIRECT	GO:0007389~pattern specification process	5	0.320718	0.0871174	E1BI79, F1MKX9, F1MV51, G3MYB9, F1N264	1190	20	13824	2.9042	1	0.9795	80.8054
INTERPRO	IPR000299:FERM domain	8	0.513149	0.0871793	E1BEZ8, F1MG13, G3X6D0, E1BIH4, F1MH50, F1MDH3, F1MQI1, E1BJR7	1411	46	16802	2.07093	1	0.744395	79.1389
GOTERM_BP_DIRECT	GO:0018107~peptidyl-threonine phosphorylation	6	0.384862	0.0875099	E1BC69, F1MQJ7, F1MYV9, E1BFB4, F1N2J2, F1N791	1190	28	13824	2.48932	1	0.978797	80.9543
GOTERM_BP_DIRECT	GO:0001568~blood vessel development	6	0.384862	0.0875099	P02453, Q9XT97, P02465, Q2KIA0, F1MYX9, P80746	1190	28	13824	2.48932	1	0.978797	80.9543
GOTERM_BP_DIRECT	GO:0043931~ossification involved in bone maturation	3	0.192431	0.087829	A6QQT1, E1B949, E1B7F6	1190	6	13824	5.8084	1	0.978016	81.0746
GOTERM_BP_DIRECT	GO:0010803~regulation of tumor necrosis factor-mediated signaling pathway	3	0.192431	0.087829	E1BQ34, Q1RMU2, E1BDF2	1190	6	13824	5.8084	1	0.978016	81.0746
GOTERM_BP_DIRECT	GO:0035721~intraciliary retrograde transport	3	0.192431	0.087829	F1MG59, A7MB60, E1B860	1190	6	13824	5.8084	1	0.978016	81.0746
GOTERM_BP_DIRECT	GO:0033135~regulation of peptidyl-serine phosphorylation	3	0.192431	0.087829	E1BH60, E1BLT3, F1MLS3	1190	6	13824	5.8084	1	0.978016	81.0746
GOTERM_BP_DIRECT	GO:2000021~regulation of ion homeostasis	3	0.192431	0.087829	E1BM51, G3X788, P48733	1190	6	13824	5.8084	1	0.978016	81.0746
GOTERM_BP_DIRECT	GO:0071910~determination of liver left/right asymmetry	3	0.192431	0.087829	E1BP93, Q4GZT3, E1BJR9	1190	6	13824	5.8084	1	0.978016	81.0746
GOTERM_BP_DIRECT	GO:0060136~embryonic process involved in female pregnancy	3	0.192431	0.087829	Q0VBZ5, A7E3D9, Q0VCT9	1190	6	13824	5.8084	1	0.978016	81.0746
GOTERM_BP_DIRECT	GO:0060831~smoothened signaling pathway involved in dorsal/ventral neural tube patterning	3	0.192431	0.087829	F1N215, F1MG59, F1MCY1	1190	6	13824	5.8084	1	0.978016	81.0746
GOTERM_BP_DIRECT	GO:0035195~gene silencing by miRNA	3	0.192431	0.087829	G5E5X0, F1MHU9, Q0V8H6	1190	6	13824	5.8084	1	0.978016	81.0746
GOTERM_CC_DIRECT	GO:0005938~cell cortex	11	0.705581	0.0887792	E1B9K4, F1N7Q8, F1MYQ7, E1BKE1, P23206, E1BNV7, F1N7I5, E1BE11, A2VE03, Q27991, A5PJK4	1297	74	15461	1.77198	1	0.702567	74.7697
INTERPRO	IPR002126:Cadherin	11	0.705581	0.0893329	G3X6Y5, E1B949, F1MHH5, F1MZX3, E1BM91, E1BD40, E1BCK4, F1N416, A2VDQ2, G3MYD4, E1BAU4	1411	74	16802	1.77009	1	0.750676	79.9686
INTERPRO	IPR001606:ARID/BRIGHT DNA-binding domain	4	0.256575	0.0894033	E1B925, F1MUR2, F1MNB5, F1MYV2	1411	13	16802	3.66396	1	0.748384	79.9952
INTERPRO	IPR006153:Cation/H+ exchanger	4	0.256575	0.0894033	E1BBL2, A5D7N7, E1BB11, F1MU00	1411	13	16802	3.66396	1	0.748384	79.9952
INTERPRO	IPR013761:Sterile alpha motif/pointed domain	14	0.898012	0.0897738	F1MB71, E1BJ31, E1BKW5, G5E618, E1BEZ3, F1MNU9, E1BKK6, E1BMF4, F1MKR1, E1BIJ3, E1BIE4, E1BM00, F1MFH7, E1BBZ3	1411	103	16802	1.61854	1	0.747327	80.1345
UP_KEYWORDS	SH3 domain	17	1.09044	0.0899377	F1MEC0, F1MXG8, O97902, F1MSI9, Q0VC16, F1N657, F1MLS2, F1MG13, E1BG80, Q0P5B1, E1BIL8, E1BKY4, Q08DK5, A7MB08, A7MB57, E1BFB0, F1MMQ8	1470	135	17808	1.5255	1	0.708683	71.6346
GOTERM_MF_DIRECT	GO:0004725~protein tyrosine phosphatase activity	12	0.769724	0.0902604	Q1KZG2, E1BFE2, E1BEZ8, E1BAA9, F1MGK5, E1BIH4, F1MKX9, E1B755, E1BPA6, F1N008, F1N6W1, E1BIU7	1083	85	13095	1.70702	1	0.871525	76.8396
INTERPRO	IPR001627:Semaphorin/CD100 antigen	6	0.384862	0.0909894	F1N4C5, E1BG65, E1BFR4, G3X755, E1BE15, E1B7F6	1411	29	16802	2.4637	1	0.749681	80.5855
UP_SEQ_FEATURE	domain:EGF-like 2; calcium-binding	3	0.192431	0.0912553	Q28178, Q95116, P48733	270	12	6267	5.80278	1	0.974034	77.9166
GOTERM_CC_DIRECT	GO:0005622~intracellular	65	4.16934	0.092441	O18977, E1BHU9, E1BP73, A6QNV5, E1BIQ2, F1N5B2, F1MY84, A1A4I4, P80746, F1N657, F1MQJ7, E1B9E4, E1B949, F1MJV1, Q08DV6, E1BGX7, F1MJZ7, Q3SYU2, G3MXN3, E1BB02, A5PKI1, E1BJ31, Q0P5I2, E1BBX9, Q5E9Y9, A6QNW5, A7Z067, F1MPV3, A7MBK3, F1MFK1, E1BE90, P02465, E1BMH1, P01317, P55203, E1B7B1, E1BLH0, F1MV30, P98133, F1N5N3, F1MBU9, F1MIX6, Q58DC2, E1BPX1, O02811, F1MK99, A6QP95, F1MLZ5, P51749, E1BH60,…	1297	646	15461	1.19944	1	0.710248	76.2306
KEGG_PATHWAY	bta05410:Hypertrophic cardiomyopathy (HCM)	10	0.641437	0.0925264	E1B864, F1MBA3, F1N5T3, F1MMN6, E1BNM2, F1MHZ1, F1N757, P80747, P80746, E1BGA0	515	80	7550	1.83252	1	0.670511	71.9549
GOTERM_BP_DIRECT	GO:0034446~substrate adhesion-dependent cell spreading	7	0.449006	0.0937632	E1B8X2, F1N6S8, Q06807, F1MXG8, E1BNM2, P80746, F1MFH7	1190	37	13824	2.19777	1	0.982321	83.1843
GOTERM_BP_DIRECT	GO:0048593~camera-type eye morphogenesis	4	0.256575	0.0947173	F1N215, F1MG59, A7E303, E1BMG7	1190	13	13824	3.5744	1	0.982159	83.502
GOTERM_BP_DIRECT	GO:0007413~axonal fasciculation	4	0.256575	0.0947173	F1MHH5, E1BPC9, G5E6R9, F1MFI4	1190	13	13824	3.5744	1	0.982159	83.502
GOTERM_BP_DIRECT	GO:0080182~histone H3-K4 trimethylation	4	0.256575	0.0947173	E1BPQ2, E1BKN0, E1BHG2, F1N4V2	1190	13	13824	3.5744	1	0.982159	83.502
GOTERM_BP_DIRECT	GO:0007064~mitotic sister chromatid cohesion	4	0.256575	0.0947173	E1BKG4, Q2KIP2, E1BPS7, E1BGC3	1190	13	13824	3.5744	1	0.982159	83.502
GOTERM_BP_DIRECT	GO:0007259~JAK-STAT cascade	4	0.256575	0.0947173	Q4GZT3, F1N4V2, E1BC86, E1BPP7	1190	13	13824	3.5744	1	0.982159	83.502
SMART	SM00225:BTB	25	1.60359	0.0966062	E1BPM6, E1BPB7, Q52PG9, A3KMV1, F1MZB7, E1B7K3, A7MBG4, F1MPV7, F1MLP0, G3N351, F1MCW5, Q0VD00, G3X6H8, F1MMV0, E1BGD3, A4IFG2, E1BMR0, Q3B7N9, G3X8E7, E1BNC2, F1N7Q0, E1BF94, F1MFQ4, E1BJI4, G3MYD5	985	162	8740	1.36931	1	0.687282	76.7698
GOTERM_CC_DIRECT	GO:0005730~nucleolus	61	3.91276	0.0966443	E1B9V4, F1N5B5, E1BKE7, A6QP73, G3MYQ9, Q2TBX0, E1BPP7, E1BHU1, A6QNN6, E1B883, G3MXN4, A7Z027, A8E651, E1B8C2, F1MI29, A0JN52, A6QQ84, F1MZA7, E1BKR4, F1N371, E1BGJ0, F1MU46, E1BCT7, F1MCZ7, Q0IIJ1, E1BPY8, F1N4Q7, Q2KJB7, E1BHN9, E1BJI0, G3X6I6, P82925, G3N191, Q2KJ94, F1N4L4, E1BL06, Q3MI00, A4IFF2, F1N2H2, E1BHG2, F1MEB4, E1BN44, E1BBH8, Q58DC8, E1BPP2, E1BB33, A6QLA0, E1BIT4, Q1LZD9, F1MXG8,…	1297	605	15461	1.20191	1	0.719596	77.8101
UP_SEQ_FEATURE	region of interest:Rod	5	0.320718	0.0973838	P02548, Q29S21, P06394, P08728, A4FV94	270	41	6267	2.83062	1	0.976818	80.1536
KEGG_PATHWAY	bta04330:Notch signaling pathway	7	0.449006	0.0974031	G3X812, F1MMW6, Q9XT97, G3X7K5, F1MPE9, E1BPT8, A5D7F6	515	47	7550	2.18343	1	0.674698	73.8656
GOTERM_BP_DIRECT	GO:0006814~sodium ion transport	6	0.384862	0.0986317	A7MBD8, Q9XS59, Q6R4Q5, F1MD59, A1A4I3, Q3ZC26	1190	29	13824	2.40348	1	0.98421	84.7471
INTERPRO	IPR001356:Homeodomain	23	1.4753	0.0986811	G3N3S1, F1N693, E1BEL1, A6QLL3, E1BME7, A2VDX5, E1B9T6, A4IF73, F1MPW8, F1MKX5, E1BAD7, F1N264, F1MU46, A8KC64, F1MR77, A5D7C5, Q0VCS4, F1MM89, Q9GMA3, E1BJ03, F1MIH1, F1N1F0, G3MYB9	1411	196	16802	1.39735	1	0.776302	83.2229

## Sheet: Functional annotaion_Pregnancy
Category	Term	Count	%	PValue	Genes	List Total	Pop Hits	Pop Total	Fold Enrichment	Bonferroni	Benjamini	FDR		PValue	Genes	List Total	Pop Hits	Pop Total	Fold Enrichment	Bonferroni	Benjamini	FDR		PValue	Genes	List Total	Pop Hits	Pop Total	Fold Enrichment	Bonferroni	Benjamini	FDR
INTERPRO	IPR016024:Armadillo-type fold	81	5.17241	3.20994e-20	A7Z051, E1BKE1, E1BPU0, E1B7K5, F1MF64, A7MBJ5, P49951, G5E630, F1MF68, A2VE70, A7MBF6, A6QM02, E1B8D1, F1N463, E1B847, Q3SYU7, F1MBL6, Q1RMS6, E1B8S1, Q865S1, F1MSC0, E1BLD1, E1BPI7, E1BPV1, E1B7C4, G3X6R3, E1BC19, E1BEI6, F1MZA7, E1BP36, Q9TU34, F1MJ11, F1MX04, E1BGE5, F1MDR7, E1BM39, F1MTS8, E1BP38, F1N0A8, E1BNR0, A5D7C2, Q0P5A6, F1MUF1, E1B9B0, A2VE08, E1BKG4, E1BH40, F1MPS0, G3X6U0, F1MC39,…	1405	314	16802	3.08489	6.25617e-17	6.25617e-17	5.50227e-17
UP_KEYWORDS	Coiled coil	307	19.6041	8.91661e-19	E1BEN8, E1BKE1, A7Z019, E1BNV7, F1N3U7, F1MHG0, E1B9R5, F1MSI9, E1BET1, E1BC48, E1BBS9, G3X6L9, A2VDU6, F1MBL6, F1MX58, F1MG71, F1MDH3, F1MW55, E1BHM5, Q1LZH7, F1N0Y1, F1MFV9, E1BJV1, F1MXE5, G3MZJ5, E1B7H4, F1MH68, E1BNU3, F1MTK5, F1MF78, F1MAY4, F1MJ66, F1MEG3, F1MWS5, F1MWF0, E1B9B0, F1MQI1, F1N1E0, F1N099, E1BN16, F1MXF5, E1BNT9, F1MHX5, F1MPW8, E1BF37, F1MQ85, E1BJS7, E1BNB3, Q32LP9, A6QPQ0,…	1470	2319	17808	1.60375	2.94248e-16	2.94248e-16	1.20883e-15		5.14046e-20	A7Z017, F1MNV8, E1BJE1, F1N4J1, F1N3U6, E1BGE2, A3KN07, F1N264, E1BC41, F1N469, E1B9R5, F1MD64, F1MM72, E1BBS9, F1MBL6, Q3B7M7, F1MG71, F1MDH3, E1BND2, F1N0Y1, Q2HJ91, G3MZJ5, F1MXE2, E1BNU3, F1MTK5, F1MF78, F1MPV5, A4IFP2, A7MBK1, A7MB96, A5PKJ6, E1BL71, A5PKJ3, F1MD77, E1BBT9, F1MRD8, E1B9B0, F1MQI1, G5E556, G3X7Z2, F1N1E0, E1B7E2, E1B7E3, F1MFW9, F1MGT1, F1MXF5, F1MH50, F1MPW8, P35605, A6QLQ3,…	1884	2319	17808	1.54073	1.69635e-17	1.69635e-17	6.96898e-17		1.31992e-21	E1BAS3, E1BKE7, E1BKE1, F1MNV8, A6QNV7, E1BNV7, E1BP75, Q3B7N2, E1BJE7, F1N264, E1B9R5, F1MQ69, F1MSI9, F1MD64, E1BC48, G3X6L9, F1MBL6, F1MG71, F1MDH3, F1N1F0, A5PKI1, Q1LZH7, F1N0Y1, E1BJV1, G3MZJ5, G3MX98, F1MPV3, F1MF78, F1MPV5, F1MEG3, E1BJV9, P55203, E1B9B0, G5E556, F1MQI1, E1B7E3, E1BP93, F1N192, F1MXF5, F1MH50, F1N2W4, F1MPW8, G3MWW2, A6QLQ3, F1MQ85, A5D7N7, E1BJC6, F1MK91, F1MJ53, F1MK99,…	1470	2319	17808	1.65598	3.97297e-19	3.97297e-19	1.76471e-18
INTERPRO	IPR011989:Armadillo-like helical	49	3.12899	6.62787e-12	A2VE08, E1BKG4, F1MPS0, E1BPU0, E1B7K5, A7MBJ5, F1MF68, E1BPS3, A2VE70, A7MBF6, F1MLY7, E1B7Q7, Q3SYU7, C1JZ66, E1BM42, F1MBL6, E1BG09, Q5E9J8, E1BFV0, Q1RMS6, E1BB26, E1BKC4, Q865S1, F1MSC0, E1BGU2, E1BLD1, E1BPI7, E1BQ15, F1N2B8, E1BPV1, Q3B7M3, A0JN39, E1BKJ5, Q58DG7, F1MF54, E1BLB6, F1N7G8, E1BP36, E1BGE5, F1MJ11, F1MDR7, Q32PG1, E1BM39, F1MTS8, O46382, E1BLT9, Q0P5A6, F1MUF1, E1BCK1	1405	196	16802	2.98968	1.29178e-08	6.45891e-09	1.13611e-08
KEGG_PATHWAY	bta04512:ECM-receptor interaction	25	1.59642	4.32764e-09	P80012, F1MD40, E1BB91, F1MSI2, F1MK44, F1MJQ6, F1MTP1, F1MDD5, E1BGA0, A4FUY0, P02453, F1N7Q7, F1N0T1, Q7SIB2, Q32S24, F1MEG3, F1N474, E1BI98, F1MMN6, F1MNT4, F1MER7, Q28862, P26201, F1MZU6, F1MUS6	539	87	7550	4.02512	1.14682e-06	1.14682e-06	5.67354e-06
INTERPRO	IPR011993:Pleckstrin homology-like domain	67	4.27842	1.00459e-08	A7YWQ4, F1MF64, F1MHG0, A5PK26, G5E580, F1MBT5, F1N611, F1MHG5, F1N657, F1N795, F1MYE0, G5E5Q8, E1BNH5, F1MW59, Q3ZCE1, F1N754, F1MDH3, F1MX58, E1BGX7, F1MYE9, E1BPM0, F1MLJ5, F1N1Q7, E1BPM7, E1B7C4, E1BC19, A5PK34, E1BG38, P10894, F1MKP9, F1MSU8, F1MQI1, Q0P5E6, F1N214, F1MTN6, G5E6T2, F1MJE0, G3X6F7, E1BPS3, E1BH05, E1B9P1, G3N2B1, F1MXJ6, F1MG90, A7Z039, F1MCG9, A6QPU2, E1BH60, F1MFX6, A5D793,…	1405	382	16802	2.09747	1.95792e-05	6.52645e-06	1.722e-05
INTERPRO	IPR001452:Src homology-3 domain	43	2.74585	1.65091e-08	A6QLW6, F1MB71, F1MJI3, A2VDZ8, E1BLW4, E1BGZ5, F1MHG0, F1MMC7, E1BDA9, G3X6F7, A5D7F8, F1MSI9, F1N657, F1MJ96, F1MXJ6, A7Z039, E1BHK6, A6QPU2, A4IFR5, F1MEC0, G3N0J9, G3MZJ5, E1B7H4, Q3ZBW8, F1MXG8, Q3B7M5, F1MKZ2, A6QQU8, E1BHY2, E1BK14, F1N3K4, G3MZQ2, F1MBM9, G3MZW4, Q17R13, F1N2G5, F1MLS2, F1MG13, Q08DK5, A7MB08, A5D7U7, F1MMQ8, E1BNG8	1405	199	16802	2.58404	3.21757e-05	8.04403e-06	2.82988e-05
INTERPRO	IPR008160:Collagen triple helix repeat	24	1.53257	2.28796e-08	E1BA17, E1BB91, F1MEH6, P35246, A7E303, F1MJQ6, F1MDC2, F1MTP1, F1MSJ7, E1BKJ9, F1N7Q7, P02453, E1BCT7, A5PJL8, Q7SIB2, Q32S24, Q1RMH5, A6QPB3, G3MXE4, F1N474, E1BI98, F1N401, F1MZU6, F6R9Y9	1405	75	16802	3.82679	4.45914e-05	8.91844e-06	3.92188e-05
KEGG_PATHWAY	bta04974:Protein digestion and absorption	23	1.46871	5.41786e-08	F1MAU4, E1BA17, F1MD40, E1BB91, E1B735, F1MR06, F1MJQ6, F1MDC2, F1MTP1, F1N7Q7, P02453, Q7SIB2, Q32S24, A6QPB3, G3MXE4, F1MKK1, F1N474, E1BI98, F1MSW0, F1N401, F1MZU6, A6QPK6, F6R9Y9	539	84	7550	3.83537	1.43572e-05	7.17864e-06	7.10281e-05
GOTERM_MF_DIRECT	GO:0005201~extracellular matrix structural constituent	16	1.02171	1.05019e-07	F1MTV3, E1BBU2, Q28062, F1MJQ6, F1MTP1, F1N7Q7, P02453, Q7SIB2, F1N2J5, Q32S24, F1N474, F1MTZ4, F1MNT4, F1MZU6, A6QPK6, E1BMV3	1100	37	13095	5.14791	8.52715e-05	8.52715e-05	0.000161519
INTERPRO	IPR000742:Epidermal growth factor-like domain	41	2.61814	1.09534e-07	F1MYW1, E1B7E1, E1BBU2, F1MCT1, E1BPS6, E1BMG7, P48733, E1BJ49, Q28062, O62664, E1BGE0, F1MLR3, G3X812, E1BKL9, A4IFA5, G3X6N5, F1MSW0, F1MNT4, F1MEX4, Q06805, F1MYL5, F1MSI2, E1BE11, F1MQ74, F1MET4, E1BGJ0, E1BK92, E1B9K4, F1N6H1, F1MEG3, F1MHH5, F1MD94, F1N6Y9, F1MTZ4, F1N740, F1MER7, F1MDE1, F1MNH3, E1B9M8, E1BMV3, F1MUS6	1405	197	16802	2.48887	0.000213459	3.55797e-05	0.000187756
GOTERM_MF_DIRECT	GO:0005524~ATP binding	153	9.77011	1.51975e-11	F1MWM0, A6QP73, F1N5B2, E1BPU0, E1BNV7, A7YW98, A1A4I4, E1BCS3, E1B9R5, E1BHE5, Q0IIG5, F1MEM4, F1N759, A7MBC5, F1MQJ7, G3X6L9, F1MBL6, F1MCE7, A6QNN6, E1BIE4, F1MFH7, F1N2J2, A2VDN5, A7Z027, E1BB52, E1BPM4, Q5E9Y9, A6QLV0, F1MNU7, F1MWE0, Q8WMV0, E1B715, F1N325, F1MLM2, E1B9Q4, Q17R14, F1MX40, F1MVF1, F1MC51, Q2T9X2, E1BGN7, E1BCE1, P55203, Q27991, G5E556, A6QPE8, E1BBM3, F1MIB7, E1BMP7, F1MPP7,…	1083	1224	13095	1.65961	1.28571e-08	1.28571e-08	2.34995e-08
GOTERM_MF_DIRECT	GO:0008270~zinc ion binding	124	7.91826	4.44027e-07	E1BIF0, F1N3U7, A5D7L9, A2VDM7, E1BM64, Q32PH7, Q2T9Y5, Q24K16, Q2TBX0, E1BE54, A8E651, F1N0Y9, Q0P5M8, E1BF46, E1BPV9, A5PJN8, E1BC50, F1MTS8, F1MMY9, F1N0J8, Q9XSB5, E1BJV5, A6H735, E1BNT4, Q32LQ0, Q0VCA5, F1MPW8, F1MHX5, E1BPA5, A7Z074, Q0VFX8, A5D7F8, A6QR47, E1BJS7, F1N2H2, F1MU34, Q2TBV5, Q08DF2, Q5E9J6, F1MSW0, Q1RMU2, E1BDU8, E1BHT5, E1BBN5, E1BI59, E1BBB8, E1BNA9, E1BF00, E1BIX5, F1N303,…	1100	948	13095	1.55713	0.000360485	0.000120176	0.000682914
INTERPRO	IPR001849:Pleckstrin homology domain	44	2.80971	7.73055e-07	A7YWQ4, F1MTN6, G5E6T2, F1MJE0, A5PK26, G3X6F7, G5E580, F1MBT5, F1MHG5, F1N657, F1N795, E1B9P1, F1MYE0, F1MW59, Q3ZCE1, F1MX58, F1MXJ6, E1BPM0, F1MLJ5, F1MCG9, A7Z039, F1N1Q7, A6QPU2, E1BH60, F1MFX6, E1BPM7, E1B7C4, F1MKZ2, E1BB77, E1BK14, F1MKZ3, F1MBM9, E1BF01, A5PK34, F1MKZ7, E1BG38, F1MF11, F1N2G5, F1MKP9, F1MLS2, F1MBI8, F1MZF1, F1MSU8, Q0P5E6	1405	235	16802	2.23908	0.00150555	0.000215217	0.00132511
GOTERM_MF_DIRECT	GO:0003682~chromatin binding	53	3.38442	8.10187e-07	E1B7V5, F1N4N6, E1BIF0, A7Z019, E1BPU6, D3JUI8, A1L503, F1MGR3, A4IF62, E1BKA3, E1BL69, E1BLU8, E1BII2, A0A140T8C7, F1N7W4, E1BGW5, E1BQ37, F1N7E7, A2VDR6, F1N0J0, G5E5H1, E1B6Z5, Q2VWH6, F1N551, F1MPS0, E1BMC0, F1MQ85, E1BPF2, F1MC39, P28339, F1MCY1, E1BIC4, G3X6J7, E1BCC6, E1BKC4, E1BBH8, F1MHA1, E1BNS3, E1B7A1, E1BI59, A9CR99, F1MP49, E1BLK1, E1BBB8, F1MM81, Q0V8B7, F1MPG0, Q29RT0, G3N029, A6Q…	1100	308	13095	2.04851	0.000657656	0.000164454	0.00124606
INTERPRO	IPR015919:Cadherin-like	22	1.40485	8.30978e-07	E1BQ10, A2VDQ6, F1MXP9, E1BHE0, E1BJP8, F1MMW5, E1BIA5, E1BKL9, F1N446, A5D7V2, F1MHH5, F1MD95, F1MZX3, E1BM91, E1BDF9, F1MTZ4, F1MS00, A6QNV3, F1N3M3, F1N416, G3MYD4, Q08DJ5	1405	77	16802	3.41678	0.00161827	0.000202427	0.0014244
GOTERM_CC_DIRECT	GO:0005654~nucleoplasm	156	9.96169	8.83727e-07	E1BIF0, E1B7V9, A6QLW0, F1MN32, F1N3U7, Q3T0N1, A0JNC9, A7MBJ5, F1MVD0, G3X746, A2VDM7, A3KMV6, F1N463, E1BC48, F1MW55, Q2TBX0, F1MVT6, Q5EA36, A6QNN6, E1BFD5, F1N0Y1, A2VDN6, A7Z029, E1BDD9, F1N0Y9, F1MB09, F1N7E7, Q2T9P4, F1N4I0, E1BJD1, E1B8H0, A8KC64, A1A4H5, E1BGE5, Q5EAD3, F1N5J8, F1N2I0, F1MUF1, F1N6S4, E1BJV5, A7MB95, E1BKG4, Q0VCA5, F1MC39, F1N015, P28339, E1BGF9, E1BNB3, E1BIZ2, Q58DG1,…	1262	1310	15461	1.45892	0.000540695	0.000540695	0.00130873
GOTERM_BP_DIRECT	GO:0007156~homophilic cell adhesion via plasma membrane adhesion molecules	25	1.59642	1.17239e-06	E1BQ10, A2VDQ6, E1BHE0, E1BPU9, F1MXP9, F1MUF6, E1BJP8, E1BIA5, F1MMW5, E1BKL9, F1N446, A5D7V2, F1MHH5, F1MNG8, F1MD95, F1MZX3, E1BM91, E1BDF9, F1MS00, F1MT78, A6QNV3, F1N3M3, F1N416, G3MYD4, Q08DJ5	1169	97	13824	3.04781	0.00355304	0.00355304	0.00211387
INTERPRO	IPR002126:Cadherin	21	1.341	1.76406e-06	E1BQ10, A2VDQ6, F1MXP9, E1BHE0, E1BJP8, F1MMW5, E1BIA5, E1BKL9, F1N446, A5D7V2, F1MHH5, F1MD95, F1MZX3, E1BM91, E1BDF9, F1MS00, A6QNV3, F1N3M3, F1N416, G3MYD4, Q08DJ5	1405	74	16802	3.39369	0.00343225	0.000381944	0.00302379
SMART	SM00181:EGF	38	2.42656	2.29553e-06	F1MYW1, E1B7E1, F1MCT1, E1BPS6, E1BMG7, P48733, E1BJ49, Q28062, E1BGE0, F1MLR3, G3X812, E1BKL9, A4IFA5, G3X6N5, F1MNT4, F1MEX4, Q06805, F1MYL5, F1MSI2, E1BE11, F1MQ74, F1MET4, E1BGJ0, E1BK92, E1B9K4, F1N6H1, F1MEG3, F1MHH5, F1MD94, F1N6Y9, F1MTZ4, F1N740, F1MER7, F1MDE1, F1MNH3, E1B9M8, E1BMV3, F1MUS6	940	156	8740	2.26487	0.00103704	0.00103704	0.00325868
INTERPRO	IPR002049:EGF-like, laminin	13	0.83014	7.46057e-06	F1N0T1, F1MEG3, F1MHH5, F1N6Y9, F1MNT4, F1MSI2, F1MF28, F1MER7, E1BPS6, E1BP05, F1MET4, E1B9M8, E1BGE0	1405	33	16802	4.71101	0.0144355	0.00145301	0.0127877
INTERPRO	IPR004273:Dynein heavy chain domain	8	0.510856	1.5245e-05	F1N724, G3N1C8, F1N1K6, F1N5R7, E1BDX8, E1BLB4, F1MSP8, E1B9R5	1405	12	16802	7.97248	0.0292756	0.00269751	0.0261287
INTERPRO	IPR024317:Dynein heavy chain, P-loop containing D4 domain	8	0.510856	1.5245e-05	F1N724, G3N1C8, F1N1K6, F1N5R7, E1BDX8, E1BLB4, F1MSP8, E1B9R5	1405	12	16802	7.97248	0.0292756	0.00269751	0.0261287
INTERPRO	IPR024743:Dynein heavy chain, coiled coil stalk	8	0.510856	1.5245e-05	F1N724, G3N1C8, F1N1K6, F1N5R7, E1BDX8, E1BLB4, F1MSP8, E1B9R5	1405	12	16802	7.97248	0.0292756	0.00269751	0.0261287
INTERPRO	IPR013602:Dynein heavy chain, domain-2	8	0.510856	1.5245e-05	F1N724, G3N1C8, F1N1K6, F1N5R7, E1BDX8, E1BLB4, F1MSP8, E1B9R5	1405	12	16802	7.97248	0.0292756	0.00269751	0.0261287
INTERPRO	IPR001478:PDZ domain	28	1.78799	1.63787e-05	E1B8X2, A7YWQ4, E1BKQ6, E1B7V9, G5E6T2, E1BLW4, E1BGZ5, F1MCK2, E1BK26, F1MHG5, F1MSI9, E1BET1, F1MX58, F1N7B7, F1N415, F1N1Q7, E1BK34, F1N0Y1, F1MEC0, E1BK33, Q3T0X8, F6R8E7, E1BM96, F1MXV4, F1MMW6, F1MRX7, Q0P5E6, E1B7V2	1405	135	16802	2.48033	0.0314181	0.00265665	0.0280715
INTERPRO	IPR003961:Fibronectin, type III	35	2.23499	1.75249e-05	E1BFE2, E1BA17, E1BDH9, E1BDA9, E1BPU9, F1MHX8, E1BEJ7, F1MX14, F1N269, F1MLR3, A4IFA5, E1BHG3, F1MNG8, Q06805, F1MEQ7, E1BNH9, F1MXJ6, E1BP05, F1MW33, F1MVI0, E1BE71, E1B7U4, G3MZJ5, G3MZU6, E1BB91, E1BLM2, F1N008, F1MC23, E1BDP0, F1MQ74, E1BF00, F1MKB9, F1ME62, G3MY74, F1N401	1405	190	16802	2.20292	0.0335795	0.00262396	0.0300357
SMART	SM00326:SH3	41	2.61814	1.76407e-05	A6QLW6, F1MB71, F1MJI3, A2VDZ8, E1BLW4, E1BGZ5, F1MHG0, F1MMC7, E1BDA9, G3X6F7, A5D7F8, F1MSI9, F1N657, F1MJ96, F1MXJ6, A7Z039, E1BHK6, A6QPU2, A4IFR5, G3N0J9, G3MZJ5, E1B7H4, Q3ZBW8, F1MXG8, Q3B7M5, F1MKZ2, A6QQU8, E1BHY2, F1N3K4, F1MBM9, G3MZQ2, G3MZW4, Q17R13, F1N2G5, F1MLS2, F1MG13, Q08DK5, A7MB08, A5D7U7, F1MMQ8, E1BNG8	940	189	8740	2.017	0.00794198	0.00397891	0.0250398
INTERPRO	IPR003439:ABC transporter-like	16	1.02171	1.86902e-05	F6RLQ6, F1MWM0, E1BKP0, G3MW09, F1N3K2, F1N3L2, E1BGH0, E1BK38, E1BM99, E1BNL1, E1BCG1, E1BLT5, F1MIP7, A5D7P7, F1MYG7, A7Z038	1405	53	16802	3.61018	0.035772	0.00259858	0.0320326
GOTERM_MF_DIRECT	GO:0042626~ATPase activity, coupled to transmembrane movement of substances	15	0.957854	1.93551e-05	F6RLQ6, F1MWM0, E1BKP0, G3MW09, F1N3K2, F1N3L2, E1BK38, E1BM99, E1BNL1, E1BCG1, E1BLT5, F1MIP7, A5D7P7, F1MYG7, A7Z038	1100	47	13095	3.79932	0.0155936	0.00313836	0.0297641
KEGG_PATHWAY	bta02010:ABC transporters	13	0.83014	2.31525e-05	F6RLQ6, F1MWM0, E1BNL1, E1BKP0, E1BCG1, F1N3K2, E1BLT5, F1N3L2, F1MIP7, A5D7P7, F1MYG7, A7Z038, E1BM99	539	42	7550	4.33563	0.00611671	0.00204308	0.0303487
INTERPRO	IPR013320:Concanavalin A-like lectin/glucanase, subgroup	34	2.17114	2.77411e-05	E1BA17, F1MF64, E1B8G2, E1BBY2, F1MHX8, E1BPS3, E1BPU9, F1MJQ6, F1MTP1, F1MX14, E1BKL9, E1BDQ4, Q32S24, F1MHA5, E1BE29, G3MXE4, F1MSW0, E1BP05, F1MYL5, E1BC19, F1MSI2, E1BF00, F1ME62, F1N0A6, F1MEG3, F1MHH5, F1MD95, F1MZX3, F1N6Y9, F1MUS0, F1MER7, E1BMX5, F1N401, F1MNH3	1405	186	16802	2.186	0.0526325	0.00359806	0.0475414
INTERPRO	IPR020894:Cadherin conserved site	18	1.14943	3.87246e-05	E1BQ10, A2VDQ6, F1MXP9, E1BHE0, E1BJP8, F1MMW5, E1BIA5, E1BKL9, F1N446, A5D7V2, F1MHH5, E1BM91, E1BDF9, A6QNV3, F1N3M3, F1N416, G3MYD4, Q08DJ5	1405	69	16802	3.11967	0.0726978	0.00470613	0.0663585
UP_KEYWORDS	EGF-like domain	27	1.72414	4.24906e-05	E1B7E1, E1BPS6, E1BMG7, E1BJ49, P48733, O62664, Q28062, E1BGE0, G3X812, E1BKL9, G3X6N5, F1MEX4, Q06805, F1MSW0, F1MSI2, E1BE11, F1MQ74, E1BK92, E1BGJ0, E1B9K4, F1N6H1, F1MD94, F1N6Y9, F1MTZ4, F1MDE1, F1MNH3, F1MLA7	1470	136	17808	2.40504	0.0139243	0.00698657	0.0575896
SMART	SM00180:EGF_Lam	13	0.83014	4.46102e-05	F1N0T1, F1MEG3, F1MHH5, F1N6Y9, F1MNT4, F1MSI2, F1MF28, F1MER7, E1BPS6, E1BP05, F1MET4, E1B9M8, E1BGE0	940	31	8740	3.89911	0.0199623	0.00669889	0.0633099
GOTERM_CC_DIRECT	GO:0000785~chromatin	17	1.08557	4.88986e-05	E1BKG4, E1BQ37, G3X6R3, E1BLK1, Q2KI86, F1MC39, F1N7G8, F1MM81, Q32PH7, E1BE97, G3X6J7, F1MNL8, E1BF96, F1N685, E1BKC4, E1BCW1, O97594	1262	65	15461	3.20416	0.0294833	0.0148519	0.0723908
INTERPRO	IPR011011:Zinc finger, FYVE/PHD-type	24	1.53257	7.7793e-05	E1B7A1, E1BQ25, F1MFD2, F1MHX5, F1MP49, F1N6I8, F1N6Y2, F1N3U7, F1MQ85, E1BPE2, E1BLZ5, E1BPS3, E1BEG4, Q32LL5, E1BIC4, Q5E9J6, E1BMN9, E1BN25, F1N3F6, E1B796, E1BIA9, F1N415, E1B9N8, F1MHA1	1405	116	16802	2.47422	0.140689	0.00887943	0.133264
INTERPRO	IPR009030:Insulin-like growth factor binding protein, N-terminal	23	1.46871	8.37165e-05	Q28193, A6QR62, F1MSI2, F1MCT1, E1BE11, F1MC23, P48733, F1MQ74, E1BGJ0, E1BGE0, P13384, E1B9K4, G3X812, F1N6H1, G3X6N5, F1MD94, O18739, F1N6Y9, F1MTZ4, F1N740, F1N758, F1MNH3, E1B9M8	1405	109	16802	2.5234	0.150553	0.00902405	0.143404
INTERPRO	IPR013032:EGF-like, conserved site	31	1.97957	9.71615e-05	F1MYW1, E1B7E1, E1BPS6, E1BMG7, E1BJ49, P48733, Q28062, E1BGE0, G3X812, E1BKL9, A4IFA5, G3X6N5, F1MEX4, Q06805, F1MSI2, E1BE11, F1MQ74, F1MET4, E1BGJ0, E1BK92, E1B9K4, F1N6H1, F1MD94, F1MHH5, F1N6Y9, F1MTZ4, F1MER7, F1MNH3, E1B9M8, E1BMV3, F1MUS6	1405	173	16802	2.14289	0.172525	0.0099177	0.166417
INTERPRO	IPR026983:Dynein heavy chain	7	0.446999	0.000107701	F1N724, G3N1C8, F1N1K6, F1N5R7, E1BLB4, F1MSP8, E1B9R5	1405	11	16802	7.61009	0.189352	0.0104412	0.184454
UP_KEYWORDS	Cell adhesion	30	1.91571	0.000109968	A2VDQ6, F1MK44, E1BGA0, E1BIA5, A5D7V2, O18739, F1MMN6, A6QNV3, Q28862, P26201, F1MZU6, F1N416, F1MVI0, Q08DJ5, P80012, E1BQ10, F1MDC9, E1BHE0, E1BJP8, E1BK92, F1MMW5, F1N446, E1BM91, A6QLR4, E1BDF9, F1N3M3, F1N401, Q27991, F1MUS6, F1MLA7	1470	168	17808	2.16327	0.0356407	0.0120242	0.148982
GOTERM_CC_DIRECT	GO:0005578~proteinaceous extracellular matrix	31	1.97957	0.0001179	Q9XSX7, F1MTV3, P35246, Q28062, F1MVP0, F1N2J5, Q32S24, A6QPB3, G3MXE4, O18739, F1MCY5, E1BI98, E1BDY3, A6QPK6, P80012, F1MD40, E1BB91, E1BKJ9, F1N303, E1BC50, E1BCT7, F1MK64, F1MD94, E1BN99, P79331, O18767, F1MTZ4, F1MRZ2, F1N401, E1BMV3, F1MUS6	1262	179	15461	2.12171	0.0696172	0.0237661	0.174459
INTERPRO	IPR001791:Laminin G domain	14	0.893997	0.000138439	F1MYL5, E1BKL9, Q32S24, E1BA17, F1MEG3, F1MHH5, G3MXE4, F1N6Y9, F1MSI2, F1MER7, F1N401, E1BP05, F1MJQ6, F1MTP1	1405	49	16802	3.41678	0.236496	0.0127672	0.237039
SMART	SM00233:PH	43	2.74585	0.000152356	A7YWQ4, F1MTN6, G5E6T2, A5PK26, G3X6F7, G5E580, F1MBT5, F1MHG5, F1N657, F1N795, E1B9P1, F1MYE0, F1MW59, Q3ZCE1, F1MX58, F1MXJ6, E1BPM0, F1MLJ5, F1MCG9, A7Z039, F1N1Q7, A6QPU2, E1BH60, F1MFX6, E1BPM7, E1B7C4, F1MKZ2, E1BB77, E1BK14, F1MKZ3, F1MBM9, E1BF01, A5PK34, F1MKZ7, E1BG38, F1MF11, F1N2G5, F1MKP9, F1MLS2, F1MBI8, F1MZF1, F1MSU8, Q0P5E6	940	221	8740	1.80909	0.0665521	0.0170702	0.216066
UP_KEYWORDS	Extracellular matrix	23	1.46871	0.000158847	P80012, Q9XSX7, P35246, Q28062, F1MJQ6, F1MTP1, F1N7Q7, P02453, E1BCT7, Q7SIB2, Q32S24, F1MK64, A6QPB3, G3MXE4, O18739, F1N474, P79331, O18767, F1MRZ2, F1N401, F1MZU6, A6QPK6, F1MUS6	1470	115	17808	2.42286	0.0510732	0.0130204	0.215136
INTERPRO	IPR013098:Immunoglobulin I-set	24	1.53257	0.000172716	E1BE71, F1MKY9, E1B7U4, F1N3H2, G3MZU6, E1BIT3, G3N1F0, E1BLM2, E1BE11, E1BDP0, F1MKB9, F1N269, F1MX14, E1B9K4, F1MQI5, E1BN69, F1MLS2, E1BHG3, F1MCY5, E1BNH9, F1MXJ6, F1MER7, F1MW33, F1MVI0	1405	122	16802	2.35253	0.285844	0.0151859	0.295647
GOTERM_BP_DIRECT	GO:0007605~sensory perception of sound	20	1.27714	0.000178846	E1BPC3, E1BPM4, F1MTV3, E1BIT3, Q3B7M3, F1MHG0, E1BKX1, F1MTK5, F1MXP9, E1BK26, P02453, F1MHF3, F1N0A6, Q08E39, F1MG13, E1B958, E1BP05, E1BKC4, E1BLU8, E1BFU2	1169	91	13824	2.59901	0.419012	0.237774	0.32198
SMART	SM00112:CA	20	1.27714	0.000182811	E1BQ10, A2VDQ6, F1MXP9, E1BHE0, E1BJP8, F1MMW5, E1BIA5, E1BKL9, F1N446, A5D7V2, F1MHH5, F1MD95, F1MZX3, E1BM91, E1BDF9, A6QNV3, F1N3M3, F1N416, G3MYD4, Q08DJ5	940	73	8740	2.54736	0.0793155	0.0163917	0.259204
INTERPRO	IPR003593:AAA+ ATPase domain	25	1.59642	0.000224393	F1MWM0, F6RLQ6, G3MW09, F1N3L2, E1B9R5, F1N5R7, A5D7P7, F1MYG7, A7Z038, A6QNN6, F1MSP8, F1N724, Q3MHE8, E1BKP0, A0A140T8C7, E1BK38, E1BGH0, E1BM99, E1BNL1, F1MHF3, E1BCG1, E1BLT5, A4FUD1, F1MIP7, E1BDX8	1405	132	16802	2.26491	0.354282	0.0188373	0.383945
INTERPRO	IPR026854:Vacuolar protein sorting-associated protein 13A N-terminal domain	5	0.319285	0.000226634	F1N099, E1BH30, F1MCM3, E1BPX1, E1BIF6	1405	5	16802	11.9587	0.357096	0.0182383	0.387772
INTERPRO	IPR008936:Rho GTPase activation protein	18	1.14943	0.000233339	A6QPU2, F1MJI3, F1MTN6, G3X755, G5E6T2, E1BNV7, F1MFA5, E1BB77, F1MCL8, G3X6F7, E1BB73, F1MBT5, F1MHG5, F1N795, F1MBI8, E1BFR4, A7MB08, E1BPM0	1405	79	16802	2.72477	0.365445	0.0180288	0.399223
GOTERM_MF_DIRECT	GO:0000976~transcription regulatory region sequence-specific DNA binding	10	0.63857	0.000233357	A5D7E9, F1MM81, Q32PH7, Q0VCF8, Q5EAD3, E1BDD9, E1BQ37, E1BE97, E1BLK1, F1N685	1100	27	13095	4.40909	0.172634	0.0310911	0.358303
INTERPRO	IPR019787:Zinc finger, PHD-finger	16	1.02171	0.000285677	E1B7A1, E1BQ25, F1MFD2, F1MHX5, F1MP49, F1N6I8, F1N6Y2, F1N3U7, E1BLZ5, Q32LL5, E1BIC4, E1BN25, F1N3F6, E1BIA9, E1B9N8, F1MHA1	1405	66	16802	2.89908	0.426997	0.0211901	0.488561
INTERPRO	IPR017871:ABC transporter, conserved site	13	0.83014	0.000295005	F6RLQ6, E1BKP0, G3MW09, F1N3K2, F1N3L2, E1BGH0, E1BM99, E1BNL1, E1BCG1, E1BLT5, F1MIP7, A5D7P7, A7Z038	1405	46	16802	3.37964	0.437323	0.0210729	0.504477
INTERPRO	IPR013761:Sterile alpha motif/pointed domain	21	1.341	0.000297985	F1MRF3, F1MB71, F1MTN6, Q0VCA5, Q3ZBW8, F1MDL5, F6R8E7, E1BMF4, Q32LN0, F1MQQ8, E1BBV6, E1BDR5, E1BFG7, E1BHH0, F1MXH6, G5E533, G3X6J7, E1B893, E1BBJ8, E1BBJ7, E1BFU2	1405	103	16802	2.43819	0.440583	0.0205313	0.50956
UP_SEQ_FEATURE	short sequence motif:Cell attachment site	8	0.510856	0.000365351	P02453, P13384, Q28193, A1A4K5, P79331, Q28862, P35246, F1MZU6	305	29	6267	5.66829	0.332701	0.332701	0.583121
INTERPRO	IPR001005:SANT/Myb domain	12	0.766284	0.000402372	F1N4N6, A6QLC9, F1MGM4, F1ML55, E1B741, E1BFC1, G3X7K5, E1BMQ3, E1BI11, F1MGR3, F1MMS4, F1MEB1	1405	41	16802	3.50011	0.543598	0.0266851	0.687484
SMART	SM00228:PDZ	28	1.78799	0.000419486	E1B8X2, A7YWQ4, E1BKQ6, E1B7V9, G5E6T2, E1BLW4, E1BGZ5, F1MCK2, E1BK26, F1MHG5, F1MSI9, E1BET1, F1MX58, F1N7B7, F1N415, F1N1Q7, E1BK34, F1N0Y1, F1MEC0, E1BK33, Q3T0X8, F6R8E7, E1BM96, F1MXV4, F1MMW6, F1MRX7, Q0P5E6, E1B7V2	940	128	8740	2.03391	0.172749	0.0311136	0.593855
GOTERM_MF_DIRECT	GO:0005089~Rho guanyl-nucleotide exchange factor activity	15	0.957854	0.000420227	A5D793, E1BK14, F1MBM9, G5E580, F1MBT5, E1BG38, E1B9P1, E1BH05, F1MJ96, F1N657, F1N2G5, F1MLS2, F1MXJ6, F1MSU8, F1N1Q7	1100	61	13095	2.92735	0.289152	0.0475871	0.644363
GOTERM_MF_DIRECT	GO:0005509~calcium ion binding	72	4.5977	0.000478199	F1MYW1, E1BI66, A2VDQ6, A4IFQ8, P48733, E1BGE0, G3X812, E1BIA5, E1BKL9, E1BMQ1, A6QNV3, Q2T9P0, F1MB09, F1MSI2, E1BE11, E1BHE0, F1MQ74, E1BGJ0, F1MX88, Q9TU34, E1BBP1, P10894, F1N0A6, Q17QX4, F1MHH5, F1MZX3, O18767, F1MER7, F1N121, F1N3M3, F1MMQ8, E1BMV3, A1A4K5, A5PK46, E1BPS6, E1BPE2, E1BJ49, P35816, E1BDQ4, F1MHA5, G3X6N5, A5D7V2, E1BE29, F1N5R7, F1N416, G3MYD4, Q08DJ5, E1B789, G3N3K3, E1BQ10,…	1100	571	13095	1.5011	0.321852	0.0473891	0.732949
GOTERM_MF_DIRECT	GO:0003714~transcription corepressor activity	21	1.341	0.000522887	G3MYL5, F1MGM4, E1B7H4, A7Z019, E1BLE3, G3X7K5, F1MHZ3, F1MPA7, A4FUY5, A2VDR6, A8KC64, E1BGF9, F1MW00, F1MYP4, E1BKA3, F1MP31, G5E5H1, A4FV57, E1BCC6, F1N4U8, G3MXN4	1100	107	13095	2.33641	0.346031	0.0460923	0.801187
INTERPRO	IPR001965:Zinc finger, PHD-type	17	1.08557	0.000533589	E1B7A1, E1BQ25, F1MFD2, F1MHX5, F1MP49, F1N6I8, F1N6Y2, F1N3U7, E1BLZ5, Q32LL5, E1BIC4, E1BN25, F1N3F6, E1BIA9, E1B8T3, E1B9N8, F1MHA1	1405	77	16802	2.64024	0.646631	0.0340805	0.910715
INTERPRO	IPR002017:Spectrin repeat	8	0.510856	0.000574651	E1BM64, E1BJV1, F1MLS2, F1MRT9, F1MXJ6, E1BK14, F1MF78, F1MMQ8	1405	19	16802	5.03525	0.673823	0.035494	0.980474
UP_KEYWORDS	ATP-binding	98	6.25798	0.000580655	Q5W5U4, F1N6L1, E1B7V7, Q32L40, A7Z019, E1BNV7, F1MHG0, F1N269, Q0IIG5, Q2T9Y5, F1N3N6, F1MBL6, F1N758, E1BB52, A0A140T8C7, A7Z029, Q58DN6, F1MNU7, Q17R13, F1N0J0, Q24K00, F1MIP7, Q27991, Q647I9, Q0VCX2, F1MZG0, Q06805, E1BKP0, Q75WB5, F1MXG8, F1MR06, F1MC23, E1BGH0, A0JND9, E1BLB6, E1BNL1, E1BCG1, Q0VCY0, E1BLT5, E1BIP3, E1BK52, A6QQR4, O97594, F6RLQ6, E1BPC3, E1BKQ6, G3MW09, Q29RK2, F1N791, A7Z…	1470	848	17808	1.4	0.174422	0.0376089	0.784337
GOTERM_CC_DIRECT	GO:0016020~membrane	102	6.51341	0.000584643	E1BMN0, A7Z019, A6QLW0, E1BNV7, E1B991, D3JUI8, Q2KI18, Q08E34, A7MBJ5, G5E630, G5E6J3, F1MBT5, A4IF62, A6QM02, Q2KHZ2, E1BC48, G3X6L9, A3KMV3, P26201, A6QNN6, F1MHU9, E1BGE5, F1MKP9, Q17QX4, F1MMQ8, F1N1E0, A7MB95, F1MQ87, A4FUY3, P28339, G3N1X4, G3X6Y3, Q08DF2, E1BB26, E1BHT5, E1BAF6, Q28107, A9CR99, A5PK18, E1BGH0, P84466, E1BLB6, F1MPG0, G3N029, Q0IID3, F1MTZ4, F1N3F6, F1MB52, Q17QU7, E1BC86,…	1262	902	15461	1.38539	0.300861	0.0855903	0.862327
GOTERM_MF_DIRECT	GO:0003777~microtubule motor activity	14	0.893997	0.000594989	F1N724, F1N1K6, G3N1E4, E1BLB4, E1B9R5, G3N1C8, E1BGB0, F1N5R7, A0JN40, F1MNK8, E1BDX8, A6H7H2, Q2TBQ9, F1MSP8	1100	56	13095	2.97614	0.38324	0.0471783	0.911193
GOTERM_BP_DIRECT	GO:0035023~regulation of Rho protein signal transduction	16	1.02171	0.000624352	A5D793, E1BNV7, E1BK14, F1MBM9, F1MBT5, E1BG38, E1B9P1, E1BH05, F1MJ96, F1N657, F1N2G5, F1MLS2, F1MX58, F1MXJ6, F1MSU8, F1N1Q7	1169	70	13824	2.70297	0.849851	0.468495	1.11978
INTERPRO	IPR014009:PIK-related kinase	5	0.319285	0.000634703	F1MBL6, E1BKJ5, E1BEI6, E1BLB6, F1MLY7	1405	6	16802	9.9656	0.709871	0.0379315	1.08241
INTERPRO	IPR003152:PIK-related kinase, FATC	5	0.319285	0.000634703	F1MBL6, E1BKJ5, E1BEI6, E1BLB6, F1MLY7	1405	6	16802	9.9656	0.709871	0.0379315	1.08241
GOTERM_BP_DIRECT	GO:0050953~sensory perception of light stimulus	5	0.319285	0.000661888	F1N0A6, F1MXP9, E1BK26, E1BP05, E1BFU2	1169	6	13824	9.85458	0.866032	0.395008	1.18672
GOTERM_MF_DIRECT	GO:0044822~poly(A) RNA binding	98	6.25798	0.000664099	Q32L40, F1N1E7, A6QP77, Q2KJH6, A3KN04, A2VDM7, A3KMV6, Q17QY2, Q3SYU7, F1MBL6, Q5EA36, A6QNN6, Q1RMJ7, A2VDN6, E1BB52, A8E651, Q3ZBW8, F1MNU7, F1MHU9, F1N0Y9, A5PJN8, A7MB48, E1BCT7, F1N0J0, Q24K03, E1BJV5, F1MCK2, P12344, E1B8I9, F1MX77, E1AXU0, E1BNB3, F1N2H2, E1BFV0, A5PJU0, F1N3G2, G3N166, E1BAF6, Q58DW4, A3KN18, E1BGH0, E1BLB6, E1BGY0, E1BKX7, E1BCZ0, Q2KID9, F1MVH9, A7YWQ4, Q3T0R7, E1BKQ6,…	1100	840	13095	1.38886	0.416918	0.0478559	1.01653
INTERPRO	IPR000219:Dbl homology (DH) domain	15	0.957854	0.000680401	A5D793, E1BK14, F1MBM9, F1MBT5, E1BG38, E1B9P1, E1BH05, F1MJ96, F1N657, F1N2G5, F1MLS2, F1MX58, F1MXJ6, F1MSU8, F1N1Q7	1405	64	16802	2.80282	0.73461	0.0394013	1.15992
INTERPRO	IPR001881:EGF-like calcium-binding	21	1.341	0.000815103	F1MYW1, F1MSI2, E1BE11, E1BPS6, P48733, E1BJ49, F1MQ74, E1BGJ0, E1BGE0, E1B9K4, G3X812, E1BKL9, F1N6H1, G3X6N5, F1MD94, F1MHH5, F1N6Y9, F1MTZ4, F1MER7, F1MNH3, E1BMV3	1405	111	16802	2.26246	0.795928	0.0456679	1.38804
COG_ONTOLOGY	Cell division and chromosome partitioning	16	1.02171	0.000871542	E1BLC3, E1BKQ6, F1N7I5, G3X6R3, E1BB77, E1BE31, F1MC39, F1MAY4, F1MQQ8, F1MKZ7, F1MSI9, E1BC48, E1BMK9, G5E533, Q2T9U2, E1B9B0	165	64	1671	2.53182	0.0309016	0.0309016	0.774675
UP_SEQ_FEATURE	compositionally biased region:Poly-Glu	12	0.766284	0.000885252	F1N269, F1N0J0, A2VDN6, A7MB80, A7Z019, P79331, Q08DM6, Q28862, Q9TTK4, Q3MHV6, Q2TBQ9, Q647I9	305	75	6267	3.28761	0.624842	0.387498	1.40742
INTERPRO	IPR008979:Galactose-binding domain-like	16	1.02171	0.000890106	F1MYL5, E1BLD1, Q28193, E1BH40, Q28107, E1BEJ2, Q3SX24, F1MCT1, E1BNA9, F1N0T1, E1BM39, A4IFG2, E1BMX5, E1BMQ7, Q9GLR1, F1MLA7	1405	73	16802	2.62109	0.823704	0.0483788	1.51485
INTERPRO	IPR015943:WD40/YVTN repeat-like-containing domain	43	2.74585	0.000895984	F1MRF3, F1MB52, E1BEN8, E1BPU0, Q2HJE1, F1MF64, E1BEP7, A7MBJ6, F1MNN4, F1MC90, Q2KJH4, F1MJS7, E1BK25, E1BPS3, G5E6J3, E1BH05, A5D7H2, E1BLS3, E1BJH1, Q0III3, Q32LP9, E1BH25, F1MG90, A7MB85, F1MLZ5, A6QLB5, E1BG65, F1MYZ4, G3X755, Q29RZ2, E1BC19, E1B9S6, F1N601, A2VDR6, E1BCT7, F1MWQ8, E1BFR4, E1B8R7, A6QQI6, F1MMY3, Q9TTK4, E1BPY6, E1BNR9	1405	305	16802	1.68598	0.825714	0.0473706	1.52478
INTERPRO	IPR000330:SNF2-related	10	0.63857	0.000926796	E1BPM4, E1BC33, A7Z019, F1MLB1, E1BCV0, F1N3F6, F1MQ85, A5PKK5, E1BEK4, A6QQR4	1405	32	16802	3.7371	0.835881	0.0476687	1.57683
INTERPRO	IPR003604:Zinc finger, U1-type	9	0.574713	0.000927202	F1N0Y9, F1MPW8, F1MF93, E1BF46, A5PJN8, E1BPV9, Q32PA0, F1MI25, E1BJV5	1405	26	16802	4.13956	0.836011	0.0464637	1.57751
INTERPRO	IPR011511:Variant SH3	12	0.766284	0.00094829	A5D7F8, F1MB71, A4IFR5, F1MJI3, F1MEC0, A2VDZ8, F1MG13, G3MZJ5, Q3ZBW8, E1BGZ5, E1BDA9, F1MBM9	1405	45	16802	3.18899	0.84262	0.0463062	1.61312
UP_SEQ_FEATURE	compositionally biased region:Ser-rich	10	0.63857	0.00101894	A5D7E9, A0JNI5, A6QPB3, Q32LL5, A5D7M6, A3KN19, A4FV57, Q1JPG0, A6QLT2, A6QNX5	305	54	6267	3.8051	0.676494	0.31352	1.61833
UP_KEYWORDS	Hydroxylation	12	0.766284	0.00103862	F1N7Q7, P02453, Q7SIB2, Q32S24, Q9XSX7, A6QPB3, A0JNJ0, P35246, F1N401, F1MZU6, E1BJ49, A6QPK6	1470	46	17808	3.16025	0.290306	0.0555511	1.39892
INTERPRO	IPR023413:Green fluorescent protein-like	6	0.383142	0.00121737	E1B9K4, F1MYW1, E1BE11, P48733, F1MNH3, F1MQ74	1405	11	16802	6.52294	0.906902	0.0576256	2.06637
INTERPRO	IPR017986:WD40-repeat-containing domain	39	2.49042	0.00126908	F1MRF3, E1BEN8, F1MB52, E1BPU0, Q2HJE1, E1BEP7, F1MF64, A7MBJ6, F1MNN4, F1MC90, Q2KJH4, F1MJS7, E1BK25, E1BPS3, G5E6J3, E1BH05, A5D7H2, E1BLS3, E1BJH1, Q0III3, Q32LP9, E1BH25, F1MG90, A7MB85, F1MLZ5, E1BHT5, A6QLB5, Q29RZ2, E1BC19, E1B9S6, F1N601, A2VDR6, E1BCT7, F1MWQ8, E1B8R7, A6QQI6, F1MMY3, Q9TTK4, E1BPY6	1405	273	16802	1.70839	0.915837	0.05858	2.15323
INTERPRO	IPR023362:PH-BEACH domain	5	0.319285	0.00138281	E1BC19, F1MF64, Q9TTK4, E1BPS3, F1MG90	1405	7	16802	8.54194	0.93259	0.0621952	2.34406
INTERPRO	IPR000409:BEACH domain	5	0.319285	0.00138281	E1BC19, F1MF64, Q9TTK4, E1BPS3, F1MG90	1405	7	16802	8.54194	0.93259	0.0621952	2.34406
INTERPRO	IPR002035:von Willebrand factor, type A	18	1.14943	0.00146342	P80012, E1BA17, F1MD40, E1BB91, E1BE11, A2VE29, F1MMD5, E1BF57, E1B9K4, F1MD94, G3MXE4, Q3T052, E1BI98, Q2TBV5, F1MMN6, F1N401, F1MNH3, E1BMV3	1405	92	16802	2.33975	0.942404	0.0642238	2.47909
UP_SEQ_FEATURE	compositionally biased region:Gly-rich	10	0.63857	0.00151711	Q5W5U4, A5D7H5, P19754, A6QPB3, Q0P5J4, A5D7M6, A4FV57, Q2VWH6, A6QNX5, Q0VFX8	305	57	6267	3.60483	0.813759	0.34307	2.40059
UP_KEYWORDS	SH3 domain	23	1.46871	0.00154678	A6QLW6, A4IFR5, F1MJI3, F1MEC0, F1MXG8, Q3B7M5, E1BLW4, E1BGZ5, E1BHY2, F1MHG0, F1MMC7, G3MZQ2, Q17R13, A5D7F8, F1MSI9, F1N657, F1MLS2, F1MG13, Q08DK5, F1MXJ6, A7MB08, F1MMQ8, A7Z039	1470	135	17808	2.06392	0.400004	0.0703769	2.07674
INTERPRO	IPR003598:Immunoglobulin subtype 2	29	1.85185	0.00165639	F1N3H2, F1MHX8, F1MX14, F1N269, F1N2J5, E1BN69, F1MNG8, E1BHG3, F1MCY5, F1MT78, E1BNH9, F1MXJ6, F1MW33, F1MVI0, Q9XT56, E1BE71, E1B7U4, G3MZU6, E1BIT3, G3N1F0, E1BLM2, E1BE11, E1BDP0, Q2KJF1, F1MKB9, E1B9K4, F1MQI5, F1MLS2, F1MER7	1405	186	16802	1.86453	0.960481	0.0708001	2.80163
SMART	SM01343:SM01343	5	0.319285	0.00166201	F1MBL6, E1BKJ5, E1BEI6, E1BLB6, F1MLY7	940	6	8740	7.74823	0.528508	0.10184	2.33368
INTERPRO	IPR000403:Phosphatidylinositol 3-/4-kinase, catalytic domain	7	0.446999	0.00186095	E1B8D1, F1MBL6, O02810, E1BKJ5, E1BEI6, E1BLB6, F1MLY7	1405	17	16802	4.92418	0.973494	0.0775066	3.14246
INTERPRO	IPR011704:ATPase, dynein-related, AAA domain	6	0.383142	0.00194396	F1N724, G3N1C8, E1BDX8, E1BLB4, F1MSP8, E1B9R5	1405	12	16802	5.97936	0.97746	0.0791377	3.28043
GOTERM_MF_DIRECT	GO:0001105~RNA polymerase II transcription coactivator activity	9	0.574713	0.00208407	F1MW00, Q0VCF8, E1BDD9, A7Z019, G3N029, F1MPU1, E1BF37, A5PKK5, F1MGR3	1100	29	13095	3.69451	0.816223	0.131658	3.15773
SMART	SM00146:PI3Kc	7	0.446999	0.00212414	E1B8D1, F1MBL6, O02810, E1BKJ5, E1BEI6, E1BLB6, F1MLY7	940	14	8740	4.64894	0.61754	0.113205	2.97352
UP_SEQ_FEATURE	nucleotide phosphate-binding region:ATP	23	1.46871	0.00217158	Q5W5U4, A0A140T8C7, Q9BE39, A7Z019, Q3ZBP1, Q17R13, Q58DK4, F1N269, F1N0J0, Q0IIG5, Q0V8B7, A6H768, Q24K00, A0JN40, A0JNJ0, Q06805, Q32XW6, Q27991, Q9BE41, Q28141, Q647I9, A6QQR4, O97594	305	235	6267	2.01104	0.909874	0.382027	3.41942
INTERPRO	IPR002558:I/LWEQ domain	4	0.255428	0.00218362	F1MUI0, F1MWF0, F1MDH3, F1MQI1	1405	4	16802	11.9587	0.985885	0.0866621	3.67777
INTERPRO	IPR014012:Helicase/SANT-associated, DNA binding	4	0.255428	0.00218362	E1BC33, A7Z019, F1MLB1, A5PKK5	1405	4	16802	11.9587	0.985885	0.0866621	3.67777
GOTERM_BP_DIRECT	GO:0050957~equilibrioception	4	0.255428	0.00225478	F1MHG0, F1MXP9, E1BK26, E1BFU2	1169	4	13824	11.8255	0.998944	0.746057	3.98838
INTERPRO	IPR000008:C2 calcium-dependent membrane targeting	24	1.53257	0.00228423	E1BH60, Q27974, A7Z071, F1MDC9, E1BB77, F1MJ09, E1BPE2, F1N3I4, F1MBT5, E1B7J3, F1N795, F1MF11, P10894, Q17QX4, E1B8D1, F1MBI8, E1BMQ1, A3KMV3, E1BGX7, F1N7B7, E1B796, E1BPM0, F1N415, E1B7V2	1405	146	16802	1.96582	0.988403	0.0886745	3.84411
GOTERM_CC_DIRECT	GO:0015629~actin cytoskeleton	22	1.40485	0.00251665	E1BEN8, F1MRL0, F1MXG8, E1BP80, G3X6R3, F1MKU1, E1BF57, F6R8E7, F1MCK2, E1B8H0, E1BK18, F1N6S8, E1BBQ0, Q5EAD3, E1BBS9, E1BNR0, A6QR41, Q32LP9, E1BCL1, E1B7Y3, E1BP52, E1BFU2	1262	133	15461	2.02651	0.786075	0.265398	3.6629
UP_SEQ_FEATURE	compositionally biased region:Pro-rich	15	0.957854	0.00257249	Q0P5M0, Q5E9L3, A7Z026, A7Z063, Q27974, A7Z019, A5PJN8, Q17R13, Q28062, A7MB34, A5D7H5, A5D7F8, Q3Y598, A6QPM3, Q08DM2	305	124	6267	2.48559	0.942238	0.378262	4.0386
INTERPRO	IPR013594:Dynein heavy chain, domain-1	5	0.319285	0.00258287	F1N724, E1BDX8, E1BLB4, F1MSP8, E1B9R5	1405	8	16802	7.4742	0.99353	0.0977539	4.33629
GOTERM_CC_DIRECT	GO:0044291~cell-cell contact zone	6	0.383142	0.00264248	F1MJ11, F1MQI5, F1MMW5, A6QLR4, F1MX58, F1MCK2	1262	13	15461	5.65439	0.80197	0.236536	3.84271
INTERPRO	IPR001660:Sterile alpha motif domain	16	1.02171	0.00265503	F1MRF3, F1MB71, F1MTN6, Q3ZBW8, F1MDL5, F6R8E7, F1MQQ8, E1BBV6, E1BDR5, E1BFG7, E1BHH0, G5E533, G3X6J7, E1B893, E1BBJ7, E1BFU2	1405	81	16802	2.36222	0.994381	0.0984417	4.45485
INTERPRO	IPR017884:SANT domain	8	0.510856	0.0027247	F1N4N6, F1MGM4, F1ML55, E1B741, E1BFC1, G3X7K5, E1BI11, F1MGR3	1405	24	16802	3.98624	0.995096	0.0990166	4.5692
INTERPRO	IPR011009:Protein kinase-like domain	61	3.89527	0.00274684	E1BPU0, A6QLW0, G3X782, F1N791, F1N269, E1B8D1, E1B847, E1BHE7, F1N3N6, F1MBL6, F1MXH6, F1N758, F1MPF0, E1BBJ8, F1MWP1, F1MH24, A6QR62, E1BB52, E1BK33, A6QLB8, E1B7H4, F1MDC9, A6QQU8, E1BPI2, E1BEI6, E1BAL6, Q17R13, E1B8H0, F1MW00, E1BFR5, Q32XW6, G3MZE2, F1MKY9, F1MRL0, F1MFB2, A5PK06, E1BMC1, E1BIS8, A2VDT2, F1MLY7, A0JNJ0, Q06805, O02810, F1MXJ6, A7Z039, F1MXG8, A6H7I9, F1N6C1, E1BKJ5, F1N3K4,…	1405	500	16802	1.45896	0.995304	0.0979591	4.60551
GOTERM_MF_DIRECT	GO:0005096~GTPase activator activity	28	1.78799	0.00278042	F1MTN6, F1MJI3, G5E6T2, E1BPU0, E1BNV7, A4FUE5, G3X6F7, A5PK26, F1MBT5, F1MHG5, F1N795, E1BET1, Q5E9J8, E1BPM0, A5D793, F1MKZ2, E1BB77, F1MCL8, F1MM49, F1MXV4, E1BP38, P10894, F1MBI8, A7MB08, F1MN63, F1N3C5, Q5EA00, E1BF85	1100	183	13095	1.82146	0.895738	0.159629	4.19187
INTERPRO	IPR018200:Peptidase C19, ubiquitin carboxyl-terminal hydrolase 2, conserved site	11	0.702427	0.00286791	E1BKF4, F1MSB6, A6QR55, F1N0A8, E1BC35, Q1RMU2, A5PJS6, F1N1Z2, G5E630, Q0IIF7, E1BND0	1405	44	16802	2.98968	0.996293	0.100229	4.80384
SMART	SM00717:SANT	12	0.766284	0.00315646	F1N4N6, A6QLC9, F1MGM4, F1ML55, E1B741, E1BFC1, G3X7K5, E1BMQ3, E1BI11, F1MGR3, F1MMS4, F1MEB1	940	41	8740	2.72133	0.760446	0.146812	4.38876
SMART	SM00215:VWC_out	7	0.446999	0.00322163	P80012, G3X6N5, F1MTV3, F1N740, F2FB42, F2FB40, F1MLA7	940	15	8740	4.33901	0.767422	0.135715	4.47746
SMART	SM00325:RhoGEF	15	0.957854	0.00322974	A5D793, E1BK14, F1MBM9, F1MBT5, E1BG38, E1B9P1, E1BH05, F1MJ96, F1N657, F1N2G5, F1MLS2, F1MX58, F1MXJ6, F1MSU8, F1N1Q7	940	59	8740	2.36387	0.768275	0.124471	4.48849
SMART	SM01026:SM01026	5	0.319285	0.00354853	E1BC19, F1MF64, Q9TTK4, E1BPS3, F1MG90	940	7	8740	6.64134	0.799469	0.125322	4.92122
INTERPRO	IPR013083:Zinc finger, RING/FYVE/PHD-type	49	3.12899	0.00368072	F1MRF3, E1BQ25, F1MFD2, F1N3U7, E1B847, A5D7H4, E1BN25, E1BIA9, E1B9N8, F1MPI7, F1N6I8, A7Z060, F1MTS8, E1BPY6, F1MDR8, E1BNT4, E1BH40, A2VDX6, F1MHX5, E1BPE2, F1MQ85, A7Z074, E1BPS3, E1BBY2, A5D7F8, E1B9P1, A6QR47, E1BJS7, Q32LL5, F1N2H2, E1BIC4, Q08DF2, Q5E9J6, F1N7B7, F1N415, F1MHA1, E1B7A1, A4IFR5, E1BBN5, F1MP49, F1N6Y2, A6QLI8, F1MRX7, E1BEG4, E1BC35, E1BMN9, F1N3F6, E1B7X3, E1B796	1405	387	16802	1.51415	0.999244	0.124615	6.12527
INTERPRO	IPR018936:Phosphatidylinositol 3/4-kinase, conserved site	6	0.383142	0.00426586	E1B8D1, F1MBL6, O02810, E1BEI6, E1BLB6, F1MLY7	1405	14	16802	5.12517	0.999759	0.140573	7.06585
UP_KEYWORDS	Bromodomain	7	0.446999	0.00440027	E1BNS3, A7Z019, F1MP49, F1N3U7, F1N6I8, E1BN25, A5PKK5	1470	20	17808	4.24	0.766668	0.166325	5.80344
INTERPRO	IPR018159:Spectrin/alpha-actinin	8	0.510856	0.0044686	E1BM64, E1BJV1, F1MLS2, F1MRT9, F1MXJ6, E1BK14, F1MF78, F1MMQ8	1405	26	16802	3.67961	0.999838	0.144331	7.38966
GOTERM_BP_DIRECT	GO:0034063~stress granule assembly	5	0.319285	0.00451882	F1N2B8, E1BDX8, E1BE88, Q3MI03, E1BJ59	1169	9	13824	6.56972	0.999999	0.898906	7.84165
SMART	SM00573:HSA	4	0.255428	0.0045489	E1BC33, A7Z019, F1MLB1, A5PKK5	940	4	8740	9.29787	0.872647	0.146596	6.26732
SMART	SM00307:ILWEQ	4	0.255428	0.0045489	F1MUI0, F1MWF0, F1MDH3, F1MQI1	940	4	8740	9.29787	0.872647	0.146596	6.26732
SMART	SM00451:ZnF_U1	9	0.574713	0.00459521	F1N0Y9, F1MPW8, F1MF93, E1BF46, A5PJN8, E1BPV9, Q32PA0, F1MI25, E1BJV5	940	26	8740	3.21849	0.875297	0.138174	6.32921
INTERPRO	IPR001007:von Willebrand factor, type C	9	0.574713	0.00487644	P02453, P80012, G3X6N5, F1MTV3, O18739, F1N740, F2FB42, F2FB40, F1MLA7	1405	33	16802	3.26147	0.999927	0.153926	8.03787
INTERPRO	IPR001650:Helicase, C-terminal	18	1.14943	0.00499914	Q5W5U4, E1BPM4, A7Z019, E1BMC0, F1MNU7, F1MLB1, A4FV23, F1MKU1, F1MQ85, E1BEK4, E1BMS0, F1N0J0, E1BC33, E1BCV0, F1N3F6, A5PKK5, Q28141, A6QQR4	1405	103	16802	2.08987	0.999943	0.154992	8.23204
INTERPRO	IPR020683:Ankyrin repeat-containing domain	30	1.91571	0.00502608	F1MB71, E1BLC3, F1MRL0, E1BPU0, A5PK26, G3X812, Q8HXA6, F1ME24, G5E5G8, E1B7G6, E1BMQ7, F1MNR3, F1N3B2, Q1LZH7, E1BLD1, E1BBN5, E1BFD1, F1MVI7, F1MNU7, F1N6C1, F1MKZ2, E1BHY2, E1BNU3, E1BMF4, A0JN59, F1N2I4, E1BA04, E1BMN7, E1BJI4, E1BFU2	1405	210	16802	1.70839	0.999946	0.153335	8.27462
INTERPRO	IPR003151:PIK-related kinase, FAT	4	0.255428	0.00511909	E1BKJ5, E1BEI6, E1BLB6, F1MLY7	1405	5	16802	9.56698	0.999955	0.153557	8.42148
INTERPRO	IPR024395:CLASP N-terminal domain	4	0.255428	0.00511909	E1BGU2, E1BQ15, E1B7K5, F1MF54	1405	5	16802	9.56698	0.999955	0.153557	8.42148
UP_SEQ_FEATURE	region of interest:Triple-helical region	4	0.255428	0.00527502	P02453, Q32S24, A6QPB3, F1MZU6	305	8	6267	10.2738	0.997134	0.566739	8.11633
GOTERM_BP_DIRECT	GO:0032964~collagen biosynthetic process	4	0.255428	0.00528216	P02453, P79331, Q2KJH6, E1BC50	1169	5	13824	9.46039	1	0.899442	9.10755
GOTERM_BP_DIRECT	GO:0019827~stem cell population maintenance	10	0.63857	0.005287	F1MUK2, G3X6Y3, G3N029, F1N6Y2, E1B7R0, E1BKC4, E1BG99, F1MF18, E1BCK1, O97594	1169	40	13824	2.95637	1	0.866244	9.11553
GOTERM_BP_DIRECT	GO:0000122~negative regulation of transcription from RNA polymerase II promoter	52	3.32056	0.00547622	A6QLW6, F1N4N6, F1MPA7, F1N3U7, A1L503, Q32PH7, A5D7H2, E1B7S6, E1BKA3, F1MVT6, E1BLU8, G3MXN4, E1BIA9, Q1LZH7, F1N7W4, E1BGW5, F1MHU9, E1BQ37, E1BPV9, A2VDR6, E1BLZ5, E1BB99, F1MFZ9, A8KC64, F1MK64, G3MXX8, F1MWS5, Q32XW6, F1N4U8, Q9XSB5, Q2VWH6, F1MHX5, E1BGF9, F1MCY1, F1MYP4, E1BCL9, E1B925, G3X6J7, P28088, A4FV57, E1BH42, E1BN44, E1BKC4, E1B7A1, F1MGM4, E1BIT4, A9CR99, G3X7K5, F1MNS7, F1N6Y2,…	1169	420	13824	1.46411	1	0.843138	9.42674
INTERPRO	IPR001394:Peptidase C19, ubiquitin carboxyl-terminal hydrolase 2	11	0.702427	0.00557373	E1BKF4, F1MSB6, A6QR55, F1N0A8, E1BC35, Q1RMU2, A5PJS6, F1N1Z2, G5E630, Q0IIF7, E1BND0	1405	48	16802	2.74054	0.999981	0.163546	9.13621
INTERPRO	IPR027397:Catenin binding domain	8	0.510856	0.00560487	E1BIA5, A5PK15, E1BQ10, E1BM91, A2VDQ6, E1BHE0, F1N416, Q08DJ5	1405	27	16802	3.54332	0.999983	0.161958	9.18495
GOTERM_BP_DIRECT	GO:0007018~microtubule-based movement	12	0.766284	0.00560501	F1N1K6, E1BGB0, A0JN40, F1MNK8, E1BDX8, G3N1E4, F1MCP5, Q0III3, E1BLB4, F1MSP8, E1B9R5, A7MB48	1169	55	13824	2.58011	1	0.818494	9.63799
GOTERM_CC_DIRECT	GO:0005581~collagen trimer	12	0.766284	0.00571527	F1N7Q7, P02453, A5PJL8, Q7SIB2, Q32S24, Q1RMH5, A6QPB3, E1BB91, P35246, A7E303, F1N401, F1MZU6	1262	57	15461	2.5792	0.970037	0.394143	8.13791
INTERPRO	IPR014001:Helicase, superfamily 1/2, ATP-binding domain	18	1.14943	0.00609064	Q5W5U4, E1BPM4, A7Z019, E1BMC0, F1MNU7, F1MLB1, A4FV23, F1MKU1, F1MQ85, E1BEK4, E1BMS0, F1N0J0, E1BC33, E1BCV0, F1N3F6, A5PKK5, Q28141, A6QQR4	1405	105	16802	2.05007	0.999993	0.172213	9.94242
INTERPRO	IPR000233:Cadherin, cytoplasmic domain	7	0.446999	0.00610802	E1BIA5, E1BQ10, E1BM91, A2VDQ6, E1BHE0, F1N416, Q08DJ5	1405	21	16802	3.98624	0.999993	0.170207	9.96942
SMART	SM00382:AAA	25	1.59642	0.00668136	F1MWM0, F6RLQ6, G3MW09, F1N3L2, E1B9R5, F1N5R7, A5D7P7, F1MYG7, A7Z038, A6QNN6, F1MSP8, F1N724, Q3MHE8, E1BKP0, A0A140T8C7, E1BK38, E1BGH0, E1BM99, E1BNL1, F1MHF3, E1BCG1, E1BLT5, A4FUD1, F1MIP7, E1BDX8	940	132	8740	1.76096	0.95169	0.182911	9.07785
KEGG_PATHWAY	bta04510:Focal adhesion	26	1.66028	0.00668395	F1MK44, F1MJQ6, F1MTP1, E1BGA0, F1MDD5, P02453, F1N269, F1N0T1, Q32S24, F1MMN6, E1BI98, F1MNT4, F1MDH3, Q28862, F1MZU6, P80012, E1BB91, F1MD40, F1N7Q7, E1BKX7, Q7SIB2, F1MEG3, F1N474, G3MZE2, F1MQI1, F1MUS6	539	208	7550	1.75093	0.830888	0.358726	8.41665
INTERPRO	IPR019786:Zinc finger, PHD-type, conserved site	12	0.766284	0.00684742	E1B7A1, E1BQ25, F1MFD2, Q32LL5, E1BIC4, F1MHX5, F1MP49, F1N3U7, F1N6Y2, F1N3F6, E1BN25, E1BIA9	1405	57	16802	2.51763	0.999998	0.186186	11.1106
SMART	SM00249:PHD	17	1.08557	0.00690986	E1B7A1, E1BQ25, F1MFD2, F1MHX5, F1MP49, F1N6I8, F1N6Y2, F1N3U7, E1BLZ5, Q32LL5, E1BIC4, E1BN25, F1N3F6, E1BIA9, E1B8T3, E1B9N8, F1MHA1	940	77	8740	2.05278	0.956461	0.17789	9.37432
INTERPRO	IPR001680:WD40 repeat	33	2.10728	0.00767212	F1MRF3, E1BEN8, E1BEP7, F1MF64, Q2HJE1, A7MBJ6, F1MNN4, F1MC90, Q2KJH4, F1MJS7, E1BK25, G5E6J3, E1BPS3, A5D7H2, E1BLS3, E1BJH1, Q0III3, Q32LP9, E1BH25, F1MG90, A7MB85, F1MLZ5, A6QLB5, Q29RZ2, E1BC19, E1B9S6, F1N601, A2VDR6, E1BCT7, F1MWQ8, F1MMY3, Q9TTK4, E1BPY6	1405	245	16802	1.61077	1	0.203425	12.3674
INTERPRO	IPR001331:Guanine-nucleotide dissociation stimulator, CDC24, conserved site	7	0.446999	0.00781479	F1N657, F1N2G5, A5D793, F1MX58, E1BK14, F1MBT5, F1N1Q7	1405	22	16802	3.80505	1	0.204052	12.5832
INTERPRO	IPR018359:Bromodomain, conserved site	7	0.446999	0.00781479	E1BNS3, A7Z019, F1MP49, F1N3U7, F1N6I8, E1BN25, A5PKK5	1405	22	16802	3.80505	1	0.204052	12.5832
INTERPRO	IPR000198:Rho GTPase-activating protein domain	12	0.766284	0.00782789	F1MHG5, A6QPU2, F1MJI3, F1MTN6, G5E6T2, E1BNV7, F1MFA5, A7MB08, F1MCL8, G3X6F7, E1BB73, F1MBT5	1405	58	16802	2.47422	1	0.201679	12.6029
UP_KEYWORDS	Calcium	50	3.19285	0.00784653	A2VDQ6, P35246, P02453, F1N269, E1BIA5, E1BKL9, Q32S24, A6QNV3, E1BMQ7, E1BMQ6, Q2T9P0, E1BE11, F1MTK5, F1MQ74, E1BHE0, Q9TU34, P10894, F1MHH5, O18767, F1N3M3, Q0P5E6, F1MLA7, F1MUS6, F1N1E0, Q32LQ0, A1A4K5, A5PK46, E1BJ49, P35816, G3X6N5, A5D7V2, Q9GLR1, F1N416, G3MYD4, Q08DJ5, Q28193, Q28107, E1B9S9, E1BQ10, F1MXP9, A0JND9, E1BJP8, F1MMW5, E1B9K4, F1N446, Q0VCY0, E1BM91, Q27970, E1BDF9, E1BMX5	1470	418	17808	1.44908	0.925694	0.250869	10.1291
GOTERM_MF_DIRECT	GO:0044212~transcription regulatory region DNA binding	19	1.21328	0.00787054	E1BEN8, A5PK15, F1N7W4, E1BFC1, F1MNS7, E1BI11, F1MMD5, A1L503, F1MI25, E1B842, F1MDR1, E1BCL9, A2VE49, F1MSS8, Q3Y598, A5PKK5, F1N758, E1BN44, E1B8T3, E1B9N8	1100	116	13095	1.94988	0.998365	0.367641	11.4434
INTERPRO	IPR006212:Furin-like repeat	6	0.383142	0.00808555	Q28193, A6QR62, F1MCT1, F1N740, F1MC23, F1N758	1405	16	16802	4.48452	1	0.204923	12.9912
INTERPRO	IPR021133:HEAT, type 2	6	0.383142	0.00808555	E1BGU2, E1BQ15, E1BM42, E1B7K5, E1BFV0, F1MLY7	1405	16	16802	4.48452	1	0.204923	12.9912
UP_KEYWORDS	Collagen	12	0.766284	0.00812705	F1N7Q7, P02453, A5PJL8, Q7SIB2, Q32S24, Q1RMH5, A6QPB3, F1N474, P35246, A7E303, F1N401, F1MZU6	1470	59	17808	2.46392	0.932315	0.236077	10.473
GOTERM_BP_DIRECT	GO:0016358~dendrite development	7	0.446999	0.00823151	F1MBI8, F1MNG8, E1BK87, E1BMX5, G3MY74, Q2VWH6, F1MUS6	1169	22	13824	3.76266	1	0.897849	13.846
INTERPRO	IPR013783:Immunoglobulin-like fold	68	4.34227	0.008269	E1BFE2, Q148K3, Q3YJF5, E1BPU9, E1BEJ7, F1N269, F1MX14, F1MLR3, F1N2J5, E1BN69, F1MJ00, F1MT78, E1BNH9, F1MEQ7, K7QE74, E1BFT2, K7QE75, F1MNR3, F1MVI0, Q9XT56, E1B7U4, G3MWT2, E1BB91, F1MSU2, G3N1F0, E1BLM2, E1BE11, E1BDP0, F1MKB9, Q2KJF1, F1MQI5, E1BFR4, Q17QX3, F1MER7, E1BNR9, F1MAT8, F1MKY9, E1BH40, F1N3H2, E1BA17, E1BDH9, F1MV32, Q28062, F1MHX8, F1MUF6, A5D7V5, E1BK86, A4IFA5, E1BJS7, F1MNG8,…	1405	599	16802	1.35758	1	0.206411	13.2666
GOTERM_BP_DIRECT	GO:0090263~positive regulation of canonical Wnt signaling pathway	12	0.766284	0.00845789	P02453, E1BK34, E1BIY5, F1MK64, Q0VCF8, F1N0A8, E1BPU0, F1N6C1, E1BNX9, E1B7X3, F1MDE1, E1BL05	1169	58	13824	2.44665	1	0.883393	14.1999
INTERPRO	IPR001487:Bromodomain	9	0.574713	0.00850118	E1BNS3, A7Z019, F1MP49, F1N3U7, F1N6I8, E1BN25, A5PKK5, E1BDQ2, F1MHA1	1405	36	16802	2.98968	1	0.208924	13.614
GOTERM_CC_DIRECT	GO:0015030~Cajal body	9	0.574713	0.00874234	E1BB54, F1N038, Q17QY2, F1MHZ3, A4FUD3, Q2TBX0, Q32PA0, E1BK18, F1MS14	1262	37	15461	2.98002	0.995364	0.489176	12.1937
GOTERM_CC_DIRECT	GO:0005587~collagen type IV trimer	4	0.255428	0.00897064	F1N7Q7, Q7SIB2, F1N474, F1MZU6	1262	6	15461	8.16746	0.995973	0.458145	12.4927
GOTERM_BP_DIRECT	GO:0045494~photoreceptor cell maintenance	8	0.510856	0.0090094	F1MWM0, F1MTM5, F1N0A6, E1BBS9, F1MXP9, E1BK26, E1BP05, E1BFU2	1169	29	13824	3.2622	1	0.879195	15.0563
GOTERM_BP_DIRECT	GO:0046777~protein autophosphorylation	19	1.21328	0.00919838	F1MH24, F1MRL0, E1BPU0, F1MFB2, A6H7I9, F1MP49, A6QQU8, F1N3K4, F1MC23, E1BIS8, E1B8H0, G3X696, F1N791, F1MLY7, F1N3N6, F1MBL6, G3MZE2, E1BK52, F1MPF0	1169	117	13824	1.92038	1	0.8652	15.3479
GOTERM_CC_DIRECT	GO:0017053~transcriptional repressor complex	10	0.63857	0.0094183	E1B7A1, F1N4N6, F1MGM4, F1MYP4, E1BI59, F1MPA7, E1BEP7, G5E5H1, Q32LP9, E1BCC6	1262	45	15461	2.72249	0.996946	0.439615	13.0763
INTERPRO	IPR007087:Zinc finger, C2H2	58	3.7037	0.00950771	F1MVH9, E1BPQ2, F1N0E1, F1N038, E1BGX5, A0JNC9, A6QL80, F1MC90, E1B842, G3N2D0, F1MEQ1, F1N463, E1BND9, F1N0I1, F1MU53, F1MJD3, F1MLJ0, F1MFQ4, E1BGQ4, E1BII2, F1MFV9, E1BGW3, F1N0Y9, F1N7E7, E1BF46, F1N4I0, E1BPV9, F1MI25, F1MFZ9, A8KC64, G3MXX8, F1MDR1, A0A0H3V687, Q2VWH6, E1BJV5, F1MIB3, F1MKA8, E1BFC1, E1BNN9, E1BIJ8, F1MPW8, F1ML21, F1N312, F1MCY1, E1BCL9, A2VE49, Q2TBV5, A4FV57, A6QPM3, E1B…	1405	499	16802	1.38999	1	0.227868	15.105
INTERPRO	IPR013662:RyR/IP3R Homology associated domain	4	0.255428	0.00960347	Q9TU34, E1BDQ4, F1MHA5, E1BE29	1405	6	16802	7.97248	1	0.227126	15.2456
INTERPRO	IPR014821:Inositol 1,4,5-trisphosphate/ryanodine receptor	4	0.255428	0.00960347	Q9TU34, E1BDQ4, F1MHA5, E1BE29	1405	6	16802	7.97248	1	0.227126	15.2456
INTERPRO	IPR001442:Collagen IV, non-collagenous	4	0.255428	0.00960347	F1N7Q7, Q7SIB2, F1N474, F1MZU6	1405	6	16802	7.97248	1	0.227126	15.2456
INTERPRO	IPR002884:Proprotein convertase, P	4	0.255428	0.00960347	Q28193, E1BEJ2, F1MCT1, Q9GLR1	1405	6	16802	7.97248	1	0.227126	15.2456
INTERPRO	IPR015925:Ryanodine receptor-related	4	0.255428	0.00960347	Q9TU34, E1BDQ4, F1MHA5, E1BE29	1405	6	16802	7.97248	1	0.227126	15.2456
INTERPRO	IPR000699:Intracellular calcium-release channel	4	0.255428	0.00960347	Q9TU34, E1BDQ4, F1MHA5, E1BE29	1405	6	16802	7.97248	1	0.227126	15.2456
INTERPRO	IPR000690:Zinc finger, C2H2-type matrin	4	0.255428	0.00960347	F1MF93, A5PJN8, Q32PA0, E1BJV5	1405	6	16802	7.97248	1	0.227126	15.2456
GOTERM_BP_DIRECT	GO:0007507~heart development	18	1.14943	0.00978001	F1N724, F1N551, F1MB52, E1BI59, E1BC86, F1MDL5, E1BBB8, E1BEI6, E1BLB6, E1AXU0, F1MCY1, Q0VCF8, G3N029, F1MF93, Q32XW6, F1MEQ7, F1N758, E1BH45	1169	109	13824	1.95283	1	0.863198	16.2394
INTERPRO	IPR013273:Peptidase M12B, ADAM-TS	7	0.446999	0.00983953	F1MVP0, E1BN99, P79331, F1MCY5, F1MRZ2, F1N303, E1BC50	1405	23	16802	3.63961	1	0.229284	15.5912
GOTERM_BP_DIRECT	GO:2001222~regulation of neuron migration	4	0.255428	0.00990243	G3MXX8, G3X755, F1N0J8, E1BNQ7	1169	6	13824	7.88366	1	0.848679	16.426
INTERPRO	IPR000331:Rap GTPase activating proteins domain	5	0.319285	0.0099317	E1BP38, E1BET1, F1MM49, F1MXV4, E1BF85	1405	11	16802	5.43578	1	0.228472	15.7257
INTERPRO	IPR002919:Trypsin Inhibitor-like, cysteine rich domain	5	0.319285	0.0099317	P80012, F1MTV3, F2FB42, F2FB40, F1MLA7	1405	11	16802	5.43578	1	0.228472	15.7257
INTERPRO	IPR023415:Low-density lipoprotein (LDL) receptor class A, conserved site	9	0.574713	0.0100705	F1N6H1, G3MX13, E1BCJ0, F1N590, F1MER7, F1MDE1, F1MLY9, E1BGJ0, F1MLA7	1405	37	16802	2.90888	1	0.228612	15.928
GOTERM_MF_DIRECT	GO:0004709~MAP kinase kinase kinase activity	5	0.319285	0.0100766	E1B7H4, F1MXH6, F1N3K4, E1BBJ8, F1N791	1100	11	13095	5.41116	0.999732	0.422039	14.424
GOTERM_BP_DIRECT	GO:0007420~brain development	15	0.957854	0.0103207	F1MB52, G3X755, F1N3U7, F1MJE0, E1BEI6, F1MBT5, E1BLB6, Q7SIB2, E1BDF9, F1MEQ7, A5D7P7, F1N6S4, E1BKC4, E1B7Y3, F1MUS6	1169	84	13824	2.11169	1	0.843191	17.0602
INTERPRO	IPR005821:Ion transport domain	17	1.08557	0.0103224	E1BDC5, E1BIS4, E1B9S9, F1MW86, E1BNX9, F1MTK5, Q9TU34, E1BL87, E1BDQ4, F1MHA5, E1BE29, F1MMU9, F1MPF0, E1BMQ7, F1N3B2, E1BK43, F1N1E0	1405	102	16802	1.99312	1	0.230978	16.294
GOTERM_BP_DIRECT	GO:0045666~positive regulation of neuron differentiation	11	0.702427	0.0106907	E1B7V5, F1MX04, F1MCY1, A5D793, E1BHG3, E1BME7, F1MNS7, E1BLE3, Q08DF2, Q2VWH6, E1BNQ7	1169	52	13824	2.50155	1	0.836815	17.6176
GOTERM_BP_DIRECT	GO:0007155~cell adhesion	25	1.59642	0.0107469	F1MYW1, Q28062, F1N2J5, O18739, Q28862, P26201, F1MZU6, Q9XT56, F1MVI0, P80012, F1MN25, E1B7U4, F1MDC9, A8KC68, E1BK92, F1MKB9, F1MEG3, A6QLR4, F1MI16, Q27991, F1N401, F1N6S4, F1MQI1, F1MUS6, F1MLA7	1169	173	13824	1.70889	1	0.8221	17.7019
SMART	SM00454:SAM	16	1.02171	0.0110182	F1MRF3, F1MB71, F1MTN6, Q3ZBW8, F1MDL5, F6R8E7, F1MQQ8, E1BBV6, E1BDR5, E1BFG7, E1BHH0, G5E533, G3X6J7, E1B893, E1BBJ7, E1BFU2	940	74	8740	2.01035	0.993315	0.255157	14.5537
GOTERM_BP_DIRECT	GO:0030521~androgen receptor signaling pathway	6	0.383142	0.0111687	F1MUK2, A4IFN7, G3X6Y3, E1B925, G3N029, G5E6J3	1169	17	13824	4.1737	1	0.818217	18.3323
INTERPRO	IPR008271:Serine/threonine-protein kinase, active site	37	2.36271	0.0112279	A6QLW0, E1BPU0, A5PK06, F1MFB2, E1BIS8, A2VDT2, F1N791, F1N269, E1B847, A0JNJ0, E1BHE7, F1MXH6, F1MXJ6, E1BBJ8, F1MH24, E1BB52, E1BK33, A6QLB8, E1B7H4, F1MDC9, A6H7I9, A6QQU8, E1BPI2, F1N3K4, E1BAL6, G3X696, E1B7J3, E1B8J7, F1MW00, F1MLS2, E1BFR5, Q32XW6, G3MZE2, E1BIP3, E1BK52, A5PJL4, F1MM88	1405	291	16802	1.52052	1	0.245832	17.5971
GOTERM_BP_DIRECT	GO:0045944~positive regulation of transcription from RNA polymerase II promoter	66	4.21456	0.0114107	E1B7V5, E1BC86, D3JUI8, A0JNC9, F1MVD0, E1BND5, E1BLQ9, A5D7H2, F1N0I1, F1MVT6, E1BFT2, Q5EA36, E1BLU8, G3MXN4, F1MNR3, E1B9N8, F1MGQ7, E1BPM4, A6QLB8, E1BB99, A1A4H5, Q9BE97, E1BD99, F1MMY9, E1BKZ6, F1N4U8, E1B6Z5, Q2VWH6, F1N1Z3, E1B8T3, F1MIB3, A8E4N8, E1BNX4, F1MKU1, Q0VCF8, G3X6Y3, E1BHG3, A0JNJ0, E1BIC4, A2VE49, F1MM51, Q5I2M5, Q2HJ84, G3X6J7, E1BKC4, A5D7F6, F1MHA1, A4IFN7, E1BIT4, P28800,…	1169	580	13824	1.34566	1	0.809697	18.6919
SMART	SM00060:FN3	25	1.59642	0.0115547	E1BFE2, E1BA17, E1BDA9, E1BPU9, E1BEJ7, F1N269, E1BHG3, F1MNG8, Q06805, F1MEQ7, F1MXJ6, F1MW33, E1BP05, F1MVI0, E1BE71, E1B7U4, G3MZU6, G3MZJ5, E1BB91, E1BLM2, F1N008, F1MC23, F1MKB9, F1ME62, F1N401	940	138	8740	1.6844	0.994769	0.253112	15.2093
UP_SEQ_FEATURE	metal ion-binding site:Magnesium 2	5	0.319285	0.0117979	P35816, P37980, P19754, Q2KJ53, Q58DK4	305	19	6267	5.40725	0.999998	0.806454	17.2992
INTERPRO	IPR027417:P-loop containing nucleoside triphosphate hydrolase	88	5.61941	0.0120917	F6RLQ6, Q5W5U4, F1MWM0, F1MY41, E1BKQ6, E1B7V9, G3MW09, E1BPU0, A7Z019, E1BNV7, F1MHG0, E1B9R5, Q2KHZ2, F1MSI9, E1BGB0, A0JN40, A5D7P7, F1MNI9, Q9BE41, Q28141, A6QNN6, A0A140T8C7, F1MEC0, Q3MHE8, E1BPM4, Q9BE39, F1MVI7, F1MNU7, F1MLB1, E1BED7, E1BK38, F1N0J0, Q24K00, F1MIP7, E1BDX8, Q27991, Q647I9, E1BFV8, F1MRL0, E1BMC0, F1N3L2, A4FV23, E1BLW4, E1BGZ5, G3N1E4, F1MKU1, F1MQ85, A5PJS5, F1MMC7, E1B…	1405	821	16802	1.28181	1	0.259279	18.8224
GOTERM_CC_DIRECT	GO:0035327~transcriptionally active chromatin	6	0.383142	0.0124869	Q17QY2, E1BMZ5, A6QQI6, E1BK18, F1MS14, E1BCF6	1262	18	15461	4.08373	0.999543	0.502969	16.9798
GOTERM_MF_DIRECT	GO:0016887~ATPase activity	17	1.08557	0.0127633	F1N724, F1N3K2, A7Z019, F1N3L2, E1BNV7, E1BGH0, E1BK38, E1BLB4, E1B9R5, G3N1C8, E1BGB0, F1N5R7, F1MPG0, A0JN40, E1BDX8, A5PKK5, F1MSP8	1100	104	13095	1.94594	0.99997	0.478949	17.9272
UP_SEQ_FEATURE	domain:Collagen IV NC1	3	0.191571	0.0131857	F1N7Q7, Q7SIB2, F1MZU6	305	4	6267	15.4107	1	0.804585	19.1385
GOTERM_CC_DIRECT	GO:0014069~postsynaptic density	12	0.766284	0.0136825	F1MJ11, Q9TU34, G3N3K3, E1BNL7, E1BLW4, Q08DM6, F1N590, E1BMN9, F6R8E7, E1BB27, F1N415, F1MBT5	1262	64	15461	2.2971	0.999782	0.504718	18.456
SMART	SM00179:EGF_CA	21	1.341	0.0138543	F1MYW1, F1MSI2, E1BE11, E1BPS6, P48733, E1BJ49, F1MQ74, E1BGJ0, E1BGE0, E1B9K4, G3X812, E1BKL9, F1N6H1, G3X6N5, F1MD94, F1MHH5, F1N6Y9, F1MTZ4, F1MER7, F1MNH3, E1BMV3	940	111	8740	1.75906	0.998175	0.282435	17.9672
GOTERM_CC_DIRECT	GO:0043235~receptor complex	15	0.957854	0.0139093	E1BFE2, A6QR62, F1MYW0, F1N3K2, F1N3L2, E1BBU2, P46626, F1MC23, E1BGJ0, F1N6H1, F1N0A6, F1MS00, Q32XW6, F1MDE1, F1N758	1262	90	15461	2.04186	0.999811	0.48284	18.7332
INTERPRO	IPR014853:Uncharacterised domain, cysteine-rich	5	0.319285	0.0139256	P80012, F1MTV3, F2FB42, F2FB40, F1MLA7	1405	12	16802	4.9828	1	0.2894	21.3672
GOTERM_MF_DIRECT	GO:0003713~transcription coactivator activity	19	1.21328	0.0152793	F1N551, A4IFN7, F1MDZ8, F1MFD2, F1MP49, F1MHZ3, E1BE31, F1N1K2, G5E6J3, A2VDT2, E1BP36, Q9BE97, E1BLQ9, G3X6Y3, E1B741, F1N4U8, G3MXN4, A5D7F6, Q6SI70	1100	124	13095	1.82408	0.999996	0.520708	21.0859
GOTERM_BP_DIRECT	GO:0006635~fatty acid beta-oxidation	8	0.510856	0.0155702	F6RLQ6, Q3T0R7, Q58DK1, Q58DM8, Q0IIL6, Q29RZ0, F1N5J8, A7Z038	1169	32	13824	2.95637	1	0.885317	24.6442
GOTERM_BP_DIRECT	GO:0060009~Sertoli cell development	4	0.255428	0.0162485	Q0IIL6, P35376, F1MNL6, F1MQ85	1169	7	13824	6.75742	1	0.884954	25.575
UP_SEQ_FEATURE	glycosylation site:N-linked (GlcNAc...)	63	4.02299	0.0163835	Q2KHZ8, Q2KJH6, Q2KI18, A2VE29, P35246, P48733, F1MK44, Q32S24, P51490, A6QPB3, P26201, P0C6R3, F1MVI0, Q9XT56, Q05B81, Q75UG4, P19754, F1MAU4, P46626, Q2KJF1, Q2KIM0, P03972, Q3T052, Q17QX3, O18767, P19111, Q32XW6, F1MRZ2, Q5EA01, F1MLA7, A2VE93, P10064, F1N0C3, A1A4K5, Q32LQ0, Q08DT3, A5PK46, Q28062, Q2KJJ8, O62664, A5D7V5, Q08DX6, Q0VCT2, A7E2Z9, Q06805, Q5I2M5, Q28862, Q9GLR1, Q08DJ5, P58354,…	305	988	6267	1.31022	1	0.839375	23.2318
KEGG_PATHWAY	bta04330:Notch signaling pathway	9	0.574713	0.0167764	E1BK34, F1MPI7, G3X812, F1MMW6, G3X6N5, F1MYP4, G3X7K5, A7Z074, A5D7F6	539	47	7550	2.68227	0.988706	0.592083	19.8928
INTERPRO	IPR000152:EGF-type aspartate/asparagine hydroxylation site	15	0.957854	0.0169045	E1BPS6, E1BE11, E1BJ49, P48733, F1MQ74, E1BGJ0, E1BGE0, E1B9K4, G3X812, F1N6H1, E1BKL9, G3X6N5, F1N6Y9, F1MTZ4, F1MNH3	1405	90	16802	1.99312	1	0.336501	25.3412
SMART	SM00150:SPEC	8	0.510856	0.0170465	E1BM64, E1BJV1, F1MLS2, F1MRT9, F1MXJ6, E1BK14, F1MF78, F1MMQ8	940	26	8740	2.86088	0.999578	0.321975	21.6573
GOTERM_CC_DIRECT	GO:0016514~SWI/SNF complex	5	0.319285	0.0173214	F1N4N6, E1B925, A7Z019, E1BJD1, A5PKK5	1262	13	15461	4.712	0.999977	0.534121	22.7996
INTERPRO	IPR011527:ABC transporter, transmembrane domain, type 1	8	0.510856	0.017389	F6RLQ6, E1BNL1, E1BLT5, G3MW09, F1MIP7, A5D7P7, A7Z038, E1BM99	1405	33	16802	2.89908	1	0.340941	25.9694
UP_SEQ_FEATURE	compositionally biased region:Poly-Arg	6	0.383142	0.0178031	A2VE08, Q9BE97, Q2TBT7, Q29RZ2, Q5I2M5, F1MLA7	305	32	6267	3.85266	1	0.835982	24.9859
INTERPRO	IPR002110:Ankyrin repeat	27	1.72414	0.0179773	E1BLC3, F1MB71, F1MRL0, A5PK26, G3X812, Q8HXA6, F1ME24, G5E5G8, E1B7G6, F1MNR3, F1N3B2, Q1LZH7, E1BLD1, E1BBN5, F1MVI7, F1MNU7, F1N6C1, F1MKZ2, E1BHY2, E1BNU3, E1BMF4, A0JN59, F1N2I4, E1BA04, E1BMN7, E1BJI4, E1BFU2	1405	202	16802	1.59844	1	0.346871	26.7255
INTERPRO	IPR003599:Immunoglobulin subtype	40	2.55428	0.0180605	F1MKY9, F1N3H2, Q148K3, F1MV32, Q28062, E1BPU9, F1MHX8, F1MUF6, F1MX14, F1N269, A5D7V5, F1N2J5, E1BN69, F1MJ00, E1BHG3, F1MNG8, F1MCY5, Q06805, F1MT78, E1BNH9, F1MXJ6, F1MW33, F1MVI0, Q9XT56, E1BE71, F1MT41, E1B7U4, G3MZU6, E1BIT3, G3N1F0, E1BLM2, E1BE11, E1BDP0, Q2KJF1, F1MKB9, F1MQI5, E1B9K4, F1MLS2, F1MER7, F1MAT8	1405	331	16802	1.44516	1	0.344841	26.8319
INTERPRO	IPR013164:Cadherin, N-terminal	7	0.446999	0.0181038	F1MMW5, F1N446, A5D7V2, E1BDF9, A6QNV3, F1N3M3, E1BJP8	1405	26	16802	3.21966	1	0.342239	26.8873
INTERPRO	IPR001846:von Willebrand factor, type D domain	5	0.319285	0.0188067	P80012, F1MTV3, F2FB42, F2FB40, F1MLA7	1405	13	16802	4.59951	1	0.349667	27.7792
INTERPRO	IPR013780:Glycosyl hydrolase, family 13, all-beta	5	0.319285	0.0188067	F1N5H2, Q2KIM0, E1BGJ4, Q2KHZ8, F1MP21	1405	13	16802	4.59951	1	0.349667	27.7792
GOTERM_BP_DIRECT	GO:0035987~endodermal cell differentiation	7	0.446999	0.0190121	F1N7Q7, E1BI98, F1MNT4, A7E303, F1N401, F1MK44, E1BGA0	1169	26	13824	3.18379	1	0.911803	29.2559
GOTERM_BP_DIRECT	GO:1901998~toxin transport	7	0.446999	0.0190121	Q32L40, E1BNH5, E1B925, E1BMX5, F1N1K2, E1BK27, Q3ZBH0	1169	26	13824	3.18379	1	0.911803	29.2559
SMART	SM00327:VWA	14	0.893997	0.0192132	P80012, E1BA17, G3MXE4, F1MD94, Q3T052, F1MD40, E1BB91, F1MMN6, Q2TBV5, E1BI98, A2VE29, F1N401, F1MNH3, E1BMV3	940	65	8740	2.00262	0.999845	0.341352	24.0735
SMART	SM00111:C4	4	0.255428	0.0192655	F1N7Q7, Q7SIB2, F1N474, F1MZU6	940	6	8740	6.19858	0.999848	0.329466	24.1309
GOTERM_CC_DIRECT	GO:0031252~cell leading edge	7	0.446999	0.0194397	F1MH24, F1N0Y1, F1MXG8, E1BPM7, A6QQI6, E1BE31, G3X696	1262	27	15461	3.17623	0.999994	0.551098	25.2277
GOTERM_BP_DIRECT	GO:0006337~nucleosome disassembly	5	0.319285	0.0195116	F1N4N6, F1N463, E1B925, A7Z019, E1BJD1	1169	13	13824	4.54827	1	0.908636	29.9026
GOTERM_BP_DIRECT	GO:0010001~glial cell differentiation	5	0.319285	0.0195116	F1MPI7, E1BIT4, E1BME7, A2VE49, F1MUS6	1169	13	13824	4.54827	1	0.908636	29.9026
INTERPRO	IPR020839:Stromalin conservative domain	3	0.191571	0.0197692	G3X6R3, F1MC39, E1B9B0	1405	3	16802	11.9587	1	0.360656	28.9841
INTERPRO	IPR009460:Ryanodine Receptor TM 4-6	3	0.191571	0.0197692	E1BDQ4, F1MHA5, E1BE29	1405	3	16802	11.9587	1	0.360656	28.9841
INTERPRO	IPR009738:BAT2, N-terminal	3	0.191571	0.0197692	E1BAF6, G3X6B2, E1BGB2	1405	3	16802	11.9587	1	0.360656	28.9841
INTERPRO	IPR013333:Ryanodine receptor	3	0.191571	0.0197692	E1BDQ4, F1MHA5, E1BE29	1405	3	16802	11.9587	1	0.360656	28.9841
INTERPRO	IPR013721:STAG	3	0.191571	0.0197692	G3X6R3, F1MC39, E1B9B0	1405	3	16802	11.9587	1	0.360656	28.9841
INTERPRO	IPR003032:Ryanodine receptor Ryr	3	0.191571	0.0197692	E1BDQ4, F1MHA5, E1BE29	1405	3	16802	11.9587	1	0.360656	28.9841
INTERPRO	IPR022385:Rhs repeat-associated core	3	0.191571	0.0197692	E1B7E1, F1MEX4, E1BMG7	1405	3	16802	11.9587	1	0.360656	28.9841
UP_SEQ_FEATURE	metal ion-binding site:Magnesium 1	5	0.319285	0.0198652	P35816, P37980, P19754, Q2KJ53, Q58DK4	305	22	6267	4.6699	1	0.842921	27.4671
GOTERM_MF_DIRECT	GO:0005219~ryanodine-sensitive calcium-release channel activity	3	0.191571	0.0199334	E1BDQ4, F1MHA5, E1BE29	1100	3	13095	11.9045	1	0.596791	26.6314
GOTERM_CC_DIRECT	GO:0005667~transcription factor complex	22	1.40485	0.0202484	F1N551, A5PK15, E1BFC1, E1BI59, E1BI11, F1MMD5, E1BBB8, E1BPV9, E1BLB6, E1BND5, Q9BE97, E1BLY0, F1MYP4, F1MWS5, E1B7S6, E1BKA3, G5E5H1, Q2HJ84, G3X6J7, Q5EA36, E1BCC6, F1MD26	1262	160	15461	1.68454	0.999996	0.542716	26.1358
KEGG_PATHWAY	bta04070:Phosphatidylinositol signaling system	14	0.893997	0.0211796	A6QLC5, F1MN32, A2VDL5, E1BB73, A6QLT2, A7Z050, Q9TU34, P10894, F1MNG6, E1B8D1, G5E5G8, Q2KJ53, O02810, E1BBJ7	539	98	7550	2.00106	0.996562	0.611508	24.4705
GOTERM_BP_DIRECT	GO:0048666~neuron development	8	0.510856	0.0214848	E1B7E1, E1BLE3, F1MEX4, G5E5H1, E1BMG7, E1BMA4, E1BCC6, A6QLT2	1169	34	13824	2.78247	1	0.920826	32.4031
INTERPRO	IPR015880:Zinc finger, C2H2-like	53	3.38442	0.021523	F1MVH9, E1BPQ2, F1N0E1, F1N038, E1BGX5, A0JNC9, F1MC90, E1B842, G3N2D0, F1MEQ1, E1BND9, F1N0I1, F1MU53, F1MJD3, F1MLJ0, F1MFQ4, E1BGQ4, E1BII2, F1MFV9, E1BGW3, F1N7E7, F1N0Y9, E1BF46, F1N4I0, E1BPV9, F1MI25, A8KC64, G3MXX8, F1MDR1, A0A0H3V687, Q2VWH6, E1BJV5, F1MIB3, F1MKA8, E1BFC1, E1BNN9, E1BIJ8, F1MPW8, F1ML21, E1BGF9, F1MCY1, E1BCL9, A2VE49, A4FV57, A6QPM3, E1BH42, E1BN44, G3MWL9, E1BBB8, Q6H…	1405	469	16802	1.35141	1	0.382385	31.1308
INTERPRO	IPR008144:Guanylate kinase	6	0.383142	0.0217063	F1MSI9, F1MEC0, E1B7V9, E1BLW4, E1BGZ5, E1BM96	1405	20	16802	3.58762	1	0.381574	31.3516
GOTERM_CC_DIRECT	GO:0097431~mitotic spindle pole	4	0.255428	0.0221892	A3KMW7, E1BMB1, F1N7I5, A3KN19	1262	8	15461	6.12559	0.999999	0.554165	28.2732
INTERPRO	IPR001715:Calponin homology domain	12	0.766284	0.0222753	G5E5A1, F1MQA8, F1MHF3, E1BKX7, E1BJV1, Q2HJ38, A4IFA0, F1MRT9, F1MBM9, F1MF78, G3MWR8, A6H735	1405	67	16802	2.14186	1	0.386047	32.0328
GOTERM_BP_DIRECT	GO:0006260~DNA replication	11	0.702427	0.0223213	A0A140T8C7, Q2T9Y5, E1BIF0, E1BIT4, E1BMC0, F1N7Q0, Q2T9P4, Q2KI86, E1BPF2, E1BH42, P28339	1169	58	13824	2.24277	1	0.921003	33.4375
SMART	SM00261:FU	6	0.383142	0.02253	Q28193, A6QR62, F1MCT1, F1N740, F1MC23, F1N758	940	16	8740	3.4867	0.999966	0.360986	27.6383
GOTERM_BP_DIRECT	GO:0050770~regulation of axonogenesis	6	0.383142	0.0226512	E1BGB0, G3N3K3, E1BIZ2, F1MS00, F1MXV4, F1N1E0	1169	20	13824	3.54765	1	0.916614	33.8412
GOTERM_BP_DIRECT	GO:0030334~regulation of cell migration	10	0.63857	0.0227215	F1N6S8, E1BFR4, E1B741, F1MEG3, G3X755, E1B7C4, A6H7I9, E1BKA3, F1MKU1, G3X696	1169	50	13824	2.3651	1	0.909838	33.927
GOTERM_BP_DIRECT	GO:0001764~neuron migration	14	0.893997	0.0234491	E1B7V5, A1A4K6, E1BDD9, E1BME7, Q0VD07, E1BAA0, G5E630, F1MLR3, F1MHH5, F1N6Y9, Q27991, F1MW33, E1BNQ7, F1MUS6	1169	84	13824	1.97092	1	0.909401	34.8083
SMART	SM00832:SM00832	5	0.319285	0.0235445	P80012, F1MTV3, F2FB42, F2FB40, F1MLA7	940	11	8740	4.22631	0.999979	0.361558	28.6972
INTERPRO	IPR022398:Peptidase S8, subtilisin, His-active site	4	0.255428	0.0236806	Q28193, E1BEJ2, F1MCT1, Q9GLR1	1405	8	16802	5.97936	1	0.401473	33.6881
INTERPRO	IPR009818:Ataxin-2, C-terminal	4	0.255428	0.0236806	A4FUY5, E1BE88, A5PJS6, E1BJ59	1405	8	16802	5.97936	1	0.401473	33.6881
INTERPRO	IPR022735:Domain of unknown function DUF3585	4	0.255428	0.0236806	F1MQA8, G3MYZ8, G3MWR8, A6H735	1405	8	16802	5.97936	1	0.401473	33.6881
INTERPRO	IPR015500:Peptidase S8, subtilisin-related	4	0.255428	0.0236806	Q28193, E1BEJ2, F1MCT1, Q9GLR1	1405	8	16802	5.97936	1	0.401473	33.6881
INTERPRO	IPR023828:Peptidase S8, subtilisin, Ser-active site	4	0.255428	0.0236806	Q28193, E1BEJ2, F1MCT1, Q9GLR1	1405	8	16802	5.97936	1	0.401473	33.6881
UP_KEYWORDS	Leucine-rich repeat	22	1.40485	0.0241715	A7Z026, A2VE93, F1MMI6, F1N3H2, F1MUR6, P35376, E1BIT3, E1BPU0, E1BC86, G3N1F0, E1BDP0, G3N181, A4IFA5, Q0VD31, E1BN69, A2VE78, Q5I2M5, A6QNR7, A6QLD0, Q0IIH3, G3MY74, Q647I9	1470	161	17808	1.65537	0.999689	0.52004	28.2312
INTERPRO	IPR001611:Leucine-rich repeat	30	1.91571	0.0243544	A2VE93, F1MMI6, E1B7V7, F1N3H2, F1MUR6, E1BPU0, E1BC86, A4IFA5, A6QQZ2, E1BN69, G3N2B1, F1MZG0, Q5I2M5, A6QNR7, A6QLD0, A7Z026, F1N0Y1, E1BPT0, P35376, E1BIT3, F1N6C1, G3N1F0, G3N181, E1BDP0, A2VE78, F1MSS6, Q0IIH3, G3MY74, E1BDZ4, Q647I9	1405	237	16802	1.51376	1	0.406862	34.4682
GOTERM_BP_DIRECT	GO:0051090~regulation of sequence-specific DNA binding transcription factor activity	4	0.255428	0.024384	E1B6X8, F1MDZ8, Q58DG7, E1BE83	1169	8	13824	5.91275	1	0.910869	35.9245
GOTERM_MF_DIRECT	GO:0000980~RNA polymerase II distal enhancer sequence-specific DNA binding	10	0.63857	0.0246115	A5D7E9, F1N4N6, A7Z019, G3N029, E1BQ37, E1BIQ6, F1N3F6, E1BJD1, E1BI80, F1MI25	1100	51	13095	2.33422	1	0.655265	31.8366
INTERPRO	IPR010569:Myotubularin-related	5	0.319285	0.024623	G5E5Q8, E1BNH5, A2VDL5, E1B9S5, A6QLT2	1405	14	16802	4.27097	1	0.406955	34.7768
GOTERM_BP_DIRECT	GO:0043968~histone H2A acetylation	5	0.319285	0.0255276	E1BQ25, F1MLB1, E1BKJ5, E1BDQ2, E1BB99	1169	14	13824	4.22339	1	0.913998	37.2654
INTERPRO	IPR000504:RNA recognition motif domain	26	1.66028	0.0261756	E1BB17, A8E651, F1MYK6, E1BQ37, A5D9H5, E1BPT6, D3JUI8, E1BLX2, F1N6Y5, F1MND5, F1MFZ9, F1N0M8, A3KMV6, E1BCT9, F1MLT5, Q29RT0, E1BNF0, F1MM51, A6QQP0, F1MF93, F1N2C2, E1BHM5, Q5EA36, E1BJV5, Q1RMJ7, A7MB95	1405	199	16802	1.56245	1	0.423025	36.5338
GOTERM_BP_DIRECT	GO:0006367~transcription initiation from RNA polymerase II promoter	7	0.446999	0.0269415	A6QLI8, F1MUK2, E1BEN8, G3X6Y3, G3N029, Q58DG7, G5E6J3	1169	28	13824	2.95637	1	0.918944	38.8864
INTERPRO	IPR000436:Sushi/SCR/CCP	10	0.63857	0.0270089	F1N3H5, F1MRN5, A6QLQ2, E1BJ49, F1MNH3, E1BF00, Q28062, F1MQ74, E1BCJ2, E1BK92	1405	52	16802	2.29975	1	0.429778	37.4583
INTERPRO	IPR000859:CUB domain	10	0.63857	0.0270089	F1MVP0, F1N3H5, F1MRN5, G3MX13, F1N590, E1BPS6, E1BMX5, E1BNA9, E1BJ49, F1MLY9	1405	52	16802	2.29975	1	0.429778	37.4583
INTERPRO	IPR011042:Six-bladed beta-propeller, TolB-like	8	0.510856	0.0273349	P10731, F1N6H1, E1B7E1, E1BJS7, F1MEX4, E1BMG7, F1MDE1, E1BGJ0	1405	36	16802	2.65749	1	0.430321	37.8165
KEGG_PATHWAY	bta05146:Amoebiasis	15	0.957854	0.0273823	P19754, F2FB40, F1MJQ6, F1MTP1, F1MDD5, F1N7Q7, P02453, F1N0T1, Q7SIB2, Q32S24, P10894, F1MEG3, F1N474, F1MNT4, F1MZU6	539	112	7550	1.87599	0.999362	0.650437	30.51
KEGG_PATHWAY	bta04020:Calcium signaling pathway	22	1.40485	0.0274729	A6QR62, P19754, G3N3K3, E1B9S9, F1MJI8, F1MN32, E1BLX3, P46626, F1MTK5, E1BK27, F1N269, Q9TU34, E1BDQ4, P10894, F1MHA5, E1BE29, Q0VCY0, A5PKG3, P28088, F1N758, E1BMQ6, F1N1E0	539	189	7550	1.63049	0.999378	0.602585	30.5949
GOTERM_CC_DIRECT	GO:0030529~intracellular ribonucleoprotein complex	11	0.702427	0.0275196	A5D7H5, E1BPX9, F2Z4E7, P19120, G3X6L9, E1BPU0, Q58DW4, A5D9H5, Q0VCU0, Q28141, E1BMA4	1262	62	15461	2.1736	1	0.612787	33.8508
GOTERM_BP_DIRECT	GO:0034260~negative regulation of GTPase activity	6	0.383142	0.0277176	O46382, Q08E39, E1BPU0, A6QQI6, E1BB77, Q9XT56	1169	21	13824	3.37871	1	0.918729	39.7594
KEGG_PATHWAY	bta00562:Inositol phosphate metabolism	11	0.702427	0.0280187	F1MF11, P10894, E1B8D1, A6QLC5, F1MN32, Q2KJ53, O02810, A2VDL5, A6QLT2, E1BB73, E1BBJ7	539	71	7550	2.17016	0.999464	0.566895	31.1038
INTERPRO	IPR018097:EGF-like calcium-binding, conserved site	14	0.893997	0.0281785	E1BPS6, E1BE11, E1BJ49, P48733, F1MQ74, E1BGE0, E1BGJ0, E1B9K4, G3X812, F1N6H1, E1BKL9, G3X6N5, F1MTZ4, F1MNH3	1405	87	16802	1.92439	1	0.436909	38.7345
GOTERM_BP_DIRECT	GO:0006338~chromatin remodeling	10	0.63857	0.0287121	Q32PH7, E1BPM4, E1B741, F1MNS7, F1N3U7, F1MQ85, A5PKK5, F1MGR3, F1MD26, E1BBV6	1169	52	13824	2.27413	1	0.920103	40.8607
GOTERM_BP_DIRECT	GO:0021987~cerebral cortex development	8	0.510856	0.0287984	E1B7V5, P10894, G3N3K3, E1BHG3, A5PKI9, F1MSQ8, F1MDE1, E1BK25	1169	36	13824	2.62789	1	0.914933	40.9554
GOTERM_CC_DIRECT	GO:0048786~presynaptic active zone	5	0.319285	0.0290215	G5E533, E1BMN9, F1N7B7, F1N415, E1B7V2	1262	15	15461	4.08373	1	0.612729	35.3477
GOTERM_BP_DIRECT	GO:0030317~sperm motility	9	0.574713	0.0291929	Q5W5U4, F1N724, G3N1C8, F1MUW6, E1BNR0, E1BAJ3, E1BB73, F1MYH5, E1BD55	1169	44	13824	2.41885	1	0.912056	41.3864
KEGG_PATHWAY	bta03460:Fanconi anemia pathway	9	0.574713	0.0294525	E1B6X8, G3X787, F1MPG0, E1BDI4, F1N7Q0, A0JN73, Q2KI86, F1MLY7, E1BE83	539	52	7550	2.42436	0.999637	0.54716	32.4243
UP_SEQ_FEATURE	domain:Helicase C-terminal	5	0.319285	0.0306693	Q5W5U4, F1N0J0, A7Z019, Q28141, A6QQR4	305	25	6267	4.10951	1	0.929525	39.2576
KEGG_PATHWAY	bta03022:Basal transcription factors	8	0.510856	0.0307315	A6QLI8, E1BEN8, F1MDZ8, E1BGK7, A7MB80, Q2TBV5, Q58DG7, E1BIA9	539	43	7550	2.60603	0.999744	0.52856	33.5825
UP_SEQ_FEATURE	repeat:HEAT 5	3	0.191571	0.0309005	Q3SYU7, A7MBJ5, A2VE70	305	6	6267	10.2738	1	0.916415	39.4889
UP_SEQ_FEATURE	repeat:HEAT 6	3	0.191571	0.0309005	Q3SYU7, A7MBJ5, A2VE70	305	6	6267	10.2738	1	0.916415	39.4889
GOTERM_CC_DIRECT	GO:0000812~Swr1 complex	4	0.255428	0.031297	E1BQ25, F1MLB1, E1BKJ5, E1BDQ2	1262	9	15461	5.44497	1	0.62205	37.5555
INTERPRO	IPR001609:Myosin head, motor domain	8	0.510856	0.0313633	E1BKQ6, Q9BE39, F1MG13, E1BNV7, F1MHG0, Q9BE41, F1MMC7, Q27991	1405	37	16802	2.58567	1	0.469395	42.0866
GOTERM_MF_DIRECT	GO:0000166~nucleotide binding	34	2.17114	0.0319436	E1BIF0, F1MYK6, D3JUI8, E1BF39, P28339, F1N0M8, A3KMV6, F1MLT5, E1BNF0, F1MM51, F1MF93, E1BHM5, Q5EA36, Q1RMJ7, G3X6T7, E1BB17, P19754, E1BMZ5, A8E651, E1BQ37, A5D9H5, F1MPI0, E1BLX2, E1BPT6, F1N6Y5, F1MND5, F1MFZ9, E1BCT9, Q29RT0, F1MX25, A6QQP0, F1N2C2, E1BJV5, A7MB95	1100	282	13095	1.4353	1	0.73235	39.3052
GOTERM_BP_DIRECT	GO:0016579~protein deubiquitination	10	0.63857	0.032088	E1BKF4, F1MWQ8, A6QR55, F1N0A8, E1BC35, A5PJS6, F1N1Z2, G5E630, Q0IIF7, E1BND0	1169	53	13824	2.23122	1	0.926149	44.4593
GOTERM_BP_DIRECT	GO:0042391~regulation of membrane potential	10	0.63857	0.032088	E1B9J2, E1BIS4, E1BL87, F1MCM2, F1MW86, A3KMV3, E1BMB2, E1BNX9, F1N7B7, E1B7V2	1169	53	13824	2.23122	1	0.926149	44.4593
INTERPRO	IPR010294:ADAM-TS Spacer 1	6	0.383142	0.0321001	E1BN99, P79331, F1MCY5, F1MRZ2, F1N303, E1BC50	1405	22	16802	3.26147	1	0.473927	42.837
SMART	SM00216:VWD	5	0.319285	0.0323784	P80012, F1MTV3, F2FB42, F2FB40, F1MLA7	940	12	8740	3.87411	1	0.448487	37.3276
GOTERM_MF_DIRECT	GO:0036459~thiol-dependent ubiquitinyl hydrolase activity	6	0.383142	0.0326041	E1BKF4, F1N0A8, F1N1Z2, G5E630, Q0IIF7, E1BND0	1100	22	13095	3.24669	1	0.722436	39.939
UP_SEQ_FEATURE	compositionally biased region:Poly-Pro	7	0.446999	0.032706	A2VDN6, Q28193, Q5EAD3, Q2TBT7, Q3Y598, Q5E9F6, A5D7F6	305	50	6267	2.87666	1	0.914056	41.2682
GOTERM_BP_DIRECT	GO:0030036~actin cytoskeleton organization	13	0.83014	0.0327278	E1BKX7, E1AXU0, F1N2G5, E1BIZ2, E1BDD9, A5D7C2, F1MYE9, Q32LP9, E1BPY0, F1MMQ8, F1MBT5, E1BP52, E1B7Y3	1169	79	13824	1.94597	1	0.925006	45.1175
INTERPRO	IPR000209:Peptidase S8/S53 domain	4	0.255428	0.0333495	Q28193, E1BEJ2, F1MCT1, Q9GLR1	1405	9	16802	5.31499	1	0.4837	44.0888
INTERPRO	IPR000885:Fibrillar collagen, C-terminal	4	0.255428	0.0333495	P02453, Q32S24, F1MJQ6, F1MTP1	1405	9	16802	5.31499	1	0.4837	44.0888
GOTERM_BP_DIRECT	GO:0070059~intrinsic apoptotic signaling pathway in response to endoplasmic reticulum stress	6	0.383142	0.0334488	Q9TU34, Q0VCY0, F1MXH6, E1BB77, A5PKE2, E1B8J7	1169	22	13824	3.22513	1	0.924392	45.8504
KEGG_PATHWAY	bta04022:cGMP-PKG signaling pathway	19	1.21328	0.0334559	F1N551, P19754, E1B9S9, F1MDC9, F1MSU2, E1BNX4, P46626, F1MR06, F1MJE0, F1MTK5, F1N269, Q9TU34, F1MYE0, P10894, A7MB80, Q0VCY0, P28088, E1BMQ6, E1BN64	539	159	7550	1.67384	0.999879	0.528322	35.9887
GOTERM_MF_DIRECT	GO:0000978~RNA polymerase II core promoter proximal region sequence-specific DNA binding	33	2.10728	0.0335621	E1B7V5, F1N4N6, E1BNZ8, E1BME7, A7Z019, E1BIJ8, F1MBX3, A0JNC9, F1MCY1, E1BLY0, E1BCL9, E1B7S6, A4FV57, G3X6J7, E1BCC6, E1BLU8, E1BII2, G3MYL5, E1BPM4, E1BIT4, F1MW83, E1BI59, A9CR99, E1BGW3, F1MSU2, A3KN18, E1BJD1, Q32LN0, E1BI80, G5E5H1, F1N3F6, G3N2P1, Q2VWH6	1100	273	13095	1.43901	1	0.716349	40.8473
GOTERM_MF_DIRECT	GO:0035091~phosphatidylinositol binding	12	0.766284	0.0336295	E1B7A1, Q9TU34, E1BDG2, F1MUI0, E1B8D1, E1BD26, F1MWF0, E1BK14, A6H752, E1BH25, F1MAY4, E1BHK6	1100	71	13095	2.01204	1	0.701113	40.9107
SMART	SM00282:LamG	9	0.574713	0.0340519	F1MYL5, E1BKL9, Q32S24, F1MEG3, F1MHH5, F1N6Y9, F1MSI2, F1MER7, E1BP05	940	36	8740	2.32447	1	0.452445	38.8488
SMART	SM00297:BROMO	9	0.574713	0.0340519	E1BNS3, A7Z019, F1MP49, F1N3U7, F1N6I8, E1BN25, A5PKK5, E1BDQ2, F1MHA1	940	36	8740	2.32447	1	0.452445	38.8488
GOTERM_BP_DIRECT	GO:0046328~regulation of JNK cascade	4	0.255428	0.0343165	A5D7F8, G3N2B1, A5D7U7, E1BM96	1169	9	13824	5.25577	1	0.924658	46.7204
GOTERM_BP_DIRECT	GO:0035641~locomotory exploration behavior	4	0.255428	0.0343165	Q58DG1, F1MDC9, E1BPU0, A8KC68	1169	9	13824	5.25577	1	0.924658	46.7204
COG_ONTOLOGY	DNA replication, recombination, and repair	12	0.766284	0.0347783	F1MH45, F1N4K4, E1BMC0, A2VDX6, E1BNR0, E1BC37, A0JN73, F1MKU1, Q2KI86, E1BK52, P28339, F1ME62	165	62	1671	1.96012	0.720376	0.471205	27.0736
INTERPRO	IPR002172:Low-density lipoprotein (LDL) receptor class A repeat	9	0.574713	0.0350767	F1N6H1, G3MX13, E1BCJ0, F1N590, F1MER7, F1MDE1, F1MLY9, E1BGJ0, F1MLA7	1405	46	16802	2.33975	1	0.497938	45.7768
INTERPRO	IPR017849:Alkaline phosphatase-like, alpha/beta/alpha	7	0.446999	0.0351415	F1MU84, F1N2D5, E1BIY5, A1A4K5, F1MNS5, P19111, F1MFZ8	1405	30	16802	2.79037	1	0.495184	45.8391
INTERPRO	IPR017850:Alkaline-phosphatase-like, core domain	7	0.446999	0.0351415	F1MU84, F1N2D5, E1BIY5, A1A4K5, F1MNS5, P19111, F1MFZ8	1405	30	16802	2.79037	1	0.495184	45.8391
UP_SEQ_FEATURE	compositionally biased region:Poly-Ala	7	0.446999	0.0356163	A5D7F8, Q6H236, P79331, Q2KJH6, Q2TBQ9, A6QPM3, Q647I9	305	51	6267	2.82025	1	0.918663	44.0334
UP_SEQ_FEATURE	active site:Proton acceptor	17	1.08557	0.0356203	Q3SX04, Q3T0R7, Q58DK1, Q29RZ0, O62768, Q17QU7, Q5EAD4, Q17R13, O62664, P84466, F1N269, Q0IIG5, P48644, A0JNJ0, Q06805, Q32XW6, E1B941	305	202	6267	1.72925	1	0.905753	44.0371
GOTERM_CC_DIRECT	GO:0035363~histone locus body	3	0.191571	0.0356845	Q17QY2, E1BK18, F1MS14	1262	4	15461	9.18839	1	0.653183	41.6156
GOTERM_CC_DIRECT	GO:0032777~Piccolo NuA4 histone acetyltransferase complex	3	0.191571	0.0356845	E1BQ25, E1BB99, E1BDZ8	1262	4	15461	9.18839	1	0.653183	41.6156
GOTERM_CC_DIRECT	GO:0000778~condensed nuclear chromosome kinetochore	3	0.191571	0.0356845	E1BMQ3, E1BL69, F1MWP1	1262	4	15461	9.18839	1	0.653183	41.6156
INTERPRO	IPR012677:Nucleotide-binding, alpha-beta plait	29	1.85185	0.0358731	F1MYK6, A4FV23, D3JUI8, F1N0M8, A3KMV6, F1MLT5, E1BNF0, F1MM51, F1MF93, Q5EA36, E1BHM5, Q1RMJ7, E1BB17, A8E651, E1BQ37, A5D9H5, F1MPI0, E1BLX2, E1BPT6, F1N6Y5, F1MND5, F1MFZ9, E1BCT9, Q29RT0, F1MX25, A6QQP0, F1N2C2, E1BJV5, A7MB95	1405	235	16802	1.47576	1	0.499064	46.5388
KEGG_PATHWAY	bta00310:Lysine degradation	9	0.574713	0.0359955	Q32PH7, A7MB83, Q58DM8, Q29RZ0, F1MFD2, E1BLX2, F1N6Y5, F1MHA1, E1B9N8	539	54	7550	2.33457	0.99994	0.52635	38.159
GOTERM_CC_DIRECT	GO:0019898~extrinsic component of membrane	10	0.63857	0.036223	E1BH30, E1BC19, E1BPX1, A2VDL5, E1BIF6, E1BPE2, E1BPS3, F1MG90, F1N611, E1BHK6	1262	56	15461	2.18771	1	0.641691	42.0965
GOTERM_BP_DIRECT	GO:0034613~cellular protein localization	7	0.446999	0.0367957	E1BK34, A2VDU6, E1BPU0, E1BKA3, G3X7C2, E1BKC4, Q647I9	1169	30	13824	2.75928	1	0.933462	49.1335
SMART	SM00210:TSPN	6	0.383142	0.0369166	Q32S24, E1BA17, G3MXE4, F1N401, F1MJQ6, F1MTP1	940	18	8740	3.09929	1	0.467252	41.3736
INTERPRO	IPR013621:Ion transport N-terminal	3	0.191571	0.0373549	E1BIS4, E1BL87, F1MW86	1405	4	16802	8.96904	1	0.510051	47.9299
INTERPRO	IPR006558:LamG-like jellyroll fold	3	0.191571	0.0373549	F1N0A6, E1BF00, E1BP05	1405	4	16802	8.96904	1	0.510051	47.9299
INTERPRO	IPR020859:ROC GTPase	3	0.191571	0.0373549	F1MRL0, E1BPU0, F1N6C1	1405	4	16802	8.96904	1	0.510051	47.9299
INTERPRO	IPR006530:YD repeat	3	0.191571	0.0373549	E1B7E1, F1MEX4, E1BMG7	1405	4	16802	8.96904	1	0.510051	47.9299
GOTERM_BP_DIRECT	GO:0008286~insulin receptor signaling pathway	8	0.510856	0.0376301	F1MYE0, A6QLB8, A9CR99, F1MJE0, E1BAI2, F1MC90, E1BLI8, P58354	1169	38	13824	2.48958	1	0.933339	49.9221
GOTERM_MF_DIRECT	GO:0048763~calcium-induced calcium release activity	3	0.191571	0.0376563	E1BDQ4, F1MHA5, E1BE29	1100	4	13095	8.92841	1	0.727099	44.5862
SMART	SM00324:RhoGAP	12	0.766284	0.0378833	F1MHG5, A6QPU2, F1MJI3, F1MTN6, G5E6T2, E1BNV7, F1MFA5, A7MB08, F1MCL8, G3X6F7, E1BB73, F1MBT5	940	57	8740	1.95745	1	0.463897	42.2034
GOTERM_BP_DIRECT	GO:0048842~positive regulation of axon extension involved in axon guidance	3	0.191571	0.0381368	E1BPS6, E1BMX5, F1MKB9	1169	4	13824	8.86912	1	0.931638	50.3954
GOTERM_BP_DIRECT	GO:0045589~regulation of regulatory T cell differentiation	3	0.191571	0.0381368	E1B6X8, E1BGY0, E1BE83	1169	4	13824	8.86912	1	0.931638	50.3954
UP_KEYWORDS	GTPase activation	10	0.63857	0.0385821	F1MHG5, F1N795, F1MTN6, F1MBI8, G5E6T2, E1BB77, G3X6F7, E1BPM0, Q5EA00, F1MBT5	1470	56	17808	2.16327	0.999998	0.661089	41.3404
INTERPRO	IPR000433:Zinc finger, ZZ-type	5	0.319285	0.0391826	E1BM64, A6QLC9, E1BBN5, F1MRT9, E1BNA9	1405	16	16802	3.7371	1	0.523809	49.5988
INTERPRO	IPR000998:MAM domain	5	0.319285	0.0391826	F1MX14, F1MSW0, E1BMX5, F1MHX8, E1BPU9	1405	16	16802	3.7371	1	0.523809	49.5988
UP_SEQ_FEATURE	zinc finger region:C4-type	5	0.319285	0.0394646	A6QLI8, Q2TBV5, A5PK26, Q5EA00, P28339	305	27	6267	3.8051	1	0.915943	47.5026
UP_SEQ_FEATURE	domain:Helicase ATP-binding	5	0.319285	0.0394646	Q5W5U4, F1N0J0, A7Z019, Q28141, A6QQR4	305	27	6267	3.8051	1	0.915943	47.5026
KEGG_PATHWAY	bta04923:Regulation of lipolysis in adipocytes	9	0.574713	0.0396078	F1MYE0, P19754, A4IFB3, F1MC02, P46626, Q2KI18, F1MJE0, O62664, E1BN64	539	55	7550	2.29212	0.999978	0.534652	41.129
GOTERM_BP_DIRECT	GO:0051056~regulation of small GTPase mediated signal transduction	5	0.319285	0.0405646	E1BP38, E1BET1, F1MM49, F1MXV4, E1BF85	1169	16	13824	3.69547	1	0.938813	52.6051
SMART	SM00408:IGc2	29	1.85185	0.0406495	F1N3H2, F1MHX8, F1MX14, F1N269, F1N2J5, E1BN69, F1MNG8, E1BHG3, F1MCY5, F1MT78, E1BNH9, F1MXJ6, F1MW33, F1MVI0, Q9XT56, E1BE71, E1B7U4, G3MZU6, E1BIT3, G3N1F0, E1BLM2, E1BE11, E1BDP0, Q2KJF1, F1MKB9, E1B9K4, F1MQI5, F1MLS2, F1MER7	940	186	8740	1.44967	1	0.476285	44.5182
GOTERM_CC_DIRECT	GO:0030424~axon	16	1.02171	0.0410916	E1BE71, E1BPU0, E1BLM2, A7E3U5, F1N6X2, F1N791, F1MKB9, E1BGB0, Q2TBT7, F1MNG8, A5D7H4, E1BMN9, Q2TBX0, E1BMX5, Q27991, E1BNG8	1262	113	15461	1.73468	1	0.672574	46.2804
GOTERM_CC_DIRECT	GO:0031235~intrinsic component of the cytoplasmic side of the plasma membrane	4	0.255428	0.0420536	F1N795, F1MBI8, E1BB77, E1BPM0	1262	10	15461	4.90048	1	0.665651	47.0731
UP_SEQ_FEATURE	compositionally biased region:Glu-rich	6	0.383142	0.0425578	Q6H236, A7Z019, Q2T9P4, A4FV57, Q29RK8, Q28062	305	40	6267	3.08213	1	0.920648	50.1438
GOTERM_BP_DIRECT	GO:0007157~heterophilic cell-cell adhesion via plasma membrane cell adhesion molecules	8	0.510856	0.0426458	E1B7E1, F1MEX4, E1BMG7, P48733, F1MK44, F1MUF6, E1B9M8, E1BK92	1169	39	13824	2.42574	1	0.943663	54.4249
GOTERM_CC_DIRECT	GO:0016324~apical plasma membrane	21	1.341	0.0430267	Q05B81, A6QR62, E1BPC3, Q32LQ0, F1N3K2, F1N3L2, E1BMB2, F1MHG0, F1N008, P48733, E1BIS8, E1B9J2, E1BK86, A5PJL8, Q0IIG5, F1N6H1, E1BCG1, E1BLT5, F1MIP7, P26201, E1BP05	1262	163	15461	1.57837	1	0.659256	47.8637
INTERPRO	IPR017853:Glycoside hydrolase, superfamily	9	0.574713	0.0438359	F1N5H2, Q2KIM0, E1BK89, Q2KHZ8, F1MP21, A6QNJ8, E1BAI2, G3MY87, A6QM01	1405	48	16802	2.24226	1	0.561415	53.6233
INTERPRO	IPR001214:SET domain	9	0.574713	0.0438359	Q32PH7, A7E331, F1MFD2, E1BLX2, E1BBB5, F1N6Y5, A6QPM3, F1MHA1, E1B9N8	1405	48	16802	2.24226	1	0.561415	53.6233
GOTERM_CC_DIRECT	GO:0097228~sperm principal piece	5	0.319285	0.0444497	F1MSB1, Q0IIG5, A2VDQ0, F1MYH5, E1B9R5	1262	17	15461	3.60329	1	0.657075	49.0001
INTERPRO	IPR023152:Ras GTPase-activating protein, conserved site	4	0.255428	0.0447438	F1N795, F1MBI8, E1BB77, E1BPM0	1405	10	16802	4.78349	1	0.565605	54.3724
INTERPRO	IPR016093:MIR motif	4	0.255428	0.0447438	Q9TU34, E1BDQ4, F1MHA5, E1BE29	1405	10	16802	4.78349	1	0.565605	54.3724
INTERPRO	IPR008145:Guanylate kinase/L-type calcium channel	6	0.383142	0.0451448	F1MSI9, F1MEC0, E1B7V9, E1BLW4, E1BGZ5, E1BM96	1405	24	16802	2.98968	1	0.565543	54.6996
GOTERM_MF_DIRECT	GO:0008139~nuclear localization sequence binding	6	0.383142	0.0458308	A2VE08, C1JZ66, Q3SYU7, E1BG57, E1BFV0, E1BIX5	1100	24	13095	2.97614	1	0.782112	51.3999
GOTERM_BP_DIRECT	GO:2000637~positive regulation of gene silencing by miRNA	4	0.255428	0.0460101	F1N2B8, E1BJS7, Q2TBT7, E1BKA3	1169	10	13824	4.7302	1	0.952289	57.2279
UP_KEYWORDS	Laminin EGF-like domain	5	0.319285	0.0460688	F1MEG3, F1MHH5, F1MNT4, F1MER7, E1BPS6	1470	17	17808	3.56303	1	0.697972	47.2393
GOTERM_BP_DIRECT	GO:0033344~cholesterol efflux	6	0.383142	0.046974	E1BKP0, E1BCG1, F1N3K2, F1N3L2, E1BNR0, E1BK38	1169	24	13824	2.95637	1	0.952316	58.0004
GOTERM_BP_DIRECT	GO:0051209~release of sequestered calcium ion into cytosol	6	0.383142	0.046974	Q9TU34, E1BDQ4, F1MHA5, E1BE29, F1MDC9, F6R5F6	1169	24	13824	2.95637	1	0.952316	58.0004
SMART	SM00490:HELICc	18	1.14943	0.047061	Q5W5U4, E1BPM4, A7Z019, E1BMC0, F1MNU7, F1MLB1, A4FV23, F1MKU1, F1MQ85, E1BEK4, E1BMS0, F1N0J0, E1BC33, E1BCV0, F1N3F6, A5PKK5, Q28141, A6QQR4	940	103	8740	1.62487	1	0.516295	49.556
INTERPRO	IPR010909:PLAC	5	0.319285	0.0479529	P79331, F1MCY5, F1MCT1, F1N303, E1BC50	1405	17	16802	3.51727	1	0.584666	56.9298
GOTERM_CC_DIRECT	GO:0000118~histone deacetylase complex	6	0.383142	0.0482757	F1MWS5, E1BFC1, G3X7K5, E1BI11, F1MGR3, G3MXN4	1262	25	15461	2.94029	1	0.674224	51.942
GOTERM_BP_DIRECT	GO:0060348~bone development	7	0.446999	0.048695	A2VDS0, E1BIY5, A5PKI9, A4FUY3, Q1JPG0, F1N4U8, E1BL05	1169	32	13824	2.58683	1	0.954636	59.3471
INTERPRO	IPR000719:Protein kinase, catalytic domain	50	3.19285	0.0488289	A6QLW0, E1BPU0, F1N791, F1N269, E1B847, E1BHE7, F1N3N6, F1MXH6, F1N758, E1BBJ8, F1MWP1, F1MH24, E1BB52, A6QR62, E1BK33, A6QLB8, E1B7H4, F1MDC9, A6QQU8, E1BPI2, E1BAL6, Q17R13, E1B8H0, F1MW00, E1BFR5, Q32XW6, G3MZE2, F1MRL0, F1MFB2, A5PK06, E1BIS8, A2VDT2, A0JNJ0, Q06805, F1MXJ6, A7Z039, F1MXG8, A6H7I9, F1N6C1, F1MC23, F1N3K4, G3X696, E1B8J7, E1B7J3, F1MLS2, F1MS00, E1BIP3, E1BK52, A5PJL4, F1MM88	1405	462	16802	1.29423	1	0.588108	57.6041
KEGG_PATHWAY	bta00511:Other glycan degradation	5	0.319285	0.0495598	F1N5H2, Q2KIM0, Q2KHZ8, E1BMN0, G5E5M8	539	20	7550	3.50186	0.999999	0.592615	48.6436
GOTERM_BP_DIRECT	GO:0006281~DNA repair	16	1.02171	0.0496631	E1BKG4, E1BDI4, Q3SX24, A5PJS6, E1BKJ5, E1BEI6, F1N7G8, F1MLY7, E1BLB6, E1BP36, E1B7Q7, F1MBL6, E1BG06, E1BC35, O97594, E1BE83	1169	112	13824	1.68936	1	0.954634	60.0866
INTERPRO	IPR011990:Tetratricopeptide-like helical	24	1.53257	0.0505932	Q27968, A4IFN9, Q75UG4, F1MVI7, A7E3S8, Q2T9P4, Q08E34, A4FUY3, E1BKJ5, P49951, G3MZQ2, G3X746, G3MZW4, F1MLY7, A4IFB6, E1BPX9, E1B783, F1MGJ5, E1BLX1, A6H7H2, Q2TBQ9, F1MTS9, A6QQR4, F1N2F6	1405	192	16802	1.49484	1	0.598121	58.9321
SMART	SM00487:DEXDc	18	1.14943	0.0508752	Q5W5U4, E1BPM4, A7Z019, E1BMC0, F1MNU7, F1MLB1, A4FV23, F1MKU1, F1MQ85, E1BEK4, E1BMS0, F1N0J0, E1BC33, E1BCV0, F1N3F6, A5PKK5, Q28141, A6QQR4	940	104	8740	1.60925	1	0.532954	52.3478
UP_SEQ_FEATURE	compositionally biased region:Poly-Gly	6	0.383142	0.050913	Q6H236, Q27974, A5D7H2, A0JN40, Q3Y598, A6QPM3	305	42	6267	2.93536	1	0.944552	56.6691
UP_KEYWORDS	ANK repeat	24	1.53257	0.051987	F1MB71, E1BLC3, E1BLD1, E1BBN5, F1MRL0, F1MKZ2, E1BHY2, E1BNU3, A5PK26, E1BMF4, A0JN59, F1N2I4, G3X812, Q8HXA6, F1ME24, G5E5G8, E1BA04, E1BMN7, E1B7G6, E1BMQ7, E1BJI4, F1N3B2, Q1LZH7, E1BFU2	1470	195	17808	1.49099	1	0.715895	51.5081
INTERPRO	IPR018303:P-type ATPase, phosphorylation site	7	0.446999	0.0530589	F1N7C2, E1BPC3, G3X6T7, A7Z029, Q0VCY0, F1MR06, E1BMQ6	1405	33	16802	2.5367	1	0.612762	60.7225
INTERPRO	IPR023299:P-type ATPase, cytoplasmic domain N	7	0.446999	0.0530589	F1N7C2, E1BPC3, G3X6T7, A7Z029, Q0VCY0, F1MR06, E1BMQ6	1405	33	16802	2.5367	1	0.612762	60.7225
GOTERM_CC_DIRECT	GO:0008023~transcription elongation factor complex	5	0.319285	0.053582	Q17QY2, E1BEP7, E1BK18, F1MS14, E1BCF6	1262	18	15461	3.40311	1	0.699916	55.7608
GOTERM_CC_DIRECT	GO:0032420~stereocilium	5	0.319285	0.053582	E1BPC3, F1MG13, F1MHG0, F1MXP9, G3MYD4	1262	18	15461	3.40311	1	0.699916	55.7608
UP_SEQ_FEATURE	repeat:HEAT 4	3	0.191571	0.0540991	Q3SYU7, A7MBJ5, A2VE70	305	8	6267	7.70533	1	0.946701	58.9394
UP_SEQ_FEATURE	domain:Myosin head-like	3	0.191571	0.0540991	Q9BE39, Q9BE41, Q27991	305	8	6267	7.70533	1	0.946701	58.9394
UP_KEYWORDS	Basement membrane	4	0.255428	0.0559762	F1N7Q7, Q7SIB2, A6QPB3, F1MZU6	1470	11	17808	4.40519	1	0.718405	54.2026
GOTERM_CC_DIRECT	GO:1990316~ATG1/ULK1 kinase complex	3	0.191571	0.0562914	F1MFB2, F1N3C5, E1BH45	1262	5	15461	7.35071	1	0.705562	57.5998
GOTERM_CC_DIRECT	GO:1990909~Wnt signalosome	3	0.191571	0.0562914	F1MMW6, E1BPU0, F1MDE1	1262	5	15461	7.35071	1	0.705562	57.5998
GOTERM_CC_DIRECT	GO:0043231~intracellular membrane-bounded organelle	17	1.08557	0.0568106	F1MWM0, E1BKP0, E1BAF6, E1BMN0, F1N1E7, F1MHU9, F1MR06, A7E303, E1BK38, F1N3I4, F1N7Q7, F1MF11, Q75NY9, E1BCG1, F1MYG7, F1MFF6, F1N1Q7	1262	128	15461	1.62711	1	0.696738	57.9439
INTERPRO	IPR000082:SEA domain	5	0.319285	0.0577143	F2FB38, F1MV32, E1BBU2, F1MSI2, F1MER7	1405	18	16802	3.32187	1	0.64132	63.9043
INTERPRO	IPR001025:Bromo adjacent homology (BAH) domain	4	0.255428	0.0577983	F1MM81, A0A140T8C7, E1BLK1, F1MGR3	1405	11	16802	4.34863	1	0.638631	63.9595
INTERPRO	IPR001936:Ras GTPase-activating protein	4	0.255428	0.0577983	F1N795, F1MBI8, E1BB77, E1BPM0	1405	11	16802	4.34863	1	0.638631	63.9595
INTERPRO	IPR026082:ABC transporter A, ABCA	4	0.255428	0.0577983	F1MWM0, E1BKP0, E1BCG1, E1BK38	1405	11	16802	4.34863	1	0.638631	63.9595
GOTERM_MF_DIRECT	GO:0000175~3'-5'-exoribonuclease activity	4	0.255428	0.0584084	E1BIQ0, E1BMZ5, E1B7R0, A0JN80	1100	11	13095	4.32893	1	0.847346	60.3717
GOTERM_MF_DIRECT	GO:0008484~sulfuric ester hydrolase activity	4	0.255428	0.0584084	F1MU84, F1N2D5, A8KC68, F1MFZ8	1100	11	13095	4.32893	1	0.847346	60.3717
INTERPRO	IPR003591:Leucine-rich repeat, typical subtype	21	1.341	0.058778	F1N0Y1, F1MMI6, F1N3H2, F1MUR6, E1BPT0, E1BIT3, E1BPU0, F1N6C1, E1BC86, G3N1F0, E1BDP0, G3N181, A4IFA5, E1BN69, A6QQZ2, G3N2B1, Q5I2M5, A6QNR7, A6QLD0, Q0IIH3, G3MY74	1405	165	16802	1.52202	1	0.64179	64.5964
INTERPRO	IPR023827:Peptidase S8, subtilisin, Asp-active site	3	0.191571	0.0588454	Q28193, F1MCT1, Q9GLR1	1405	5	16802	7.17523	1	0.63904	64.6399
INTERPRO	IPR025155:WxxW domain	3	0.191571	0.0588454	F2FB42, E1BKX1, F2FB40	1405	5	16802	7.17523	1	0.63904	64.6399
INTERPRO	IPR018501:DDT domain superfamily	3	0.191571	0.0588454	F1N3U7, F1N6I8, E1BN25	1405	5	16802	7.17523	1	0.63904	64.6399
GOTERM_BP_DIRECT	GO:0045664~regulation of neuron differentiation	4	0.255428	0.0593943	Q08DT3, F1N4I0, F1MF18, E1BNG8	1169	11	13824	4.30018	1	0.97388	66.8471
GOTERM_BP_DIRECT	GO:0021510~spinal cord development	4	0.255428	0.0593943	Q0VCF8, G3N029, E1BC86, Q2TBX0	1169	11	13824	4.30018	1	0.97388	66.8471
GOTERM_BP_DIRECT	GO:0048484~enteric nervous system development	4	0.255428	0.0593943	E1BME7, F1MS00, G3N1E4, P28088	1169	11	13824	4.30018	1	0.97388	66.8471
GOTERM_BP_DIRECT	GO:0030520~intracellular estrogen receptor signaling pathway	4	0.255428	0.0593943	E1B925, Q9XSB5, F1N1K2, E1BLU8	1169	11	13824	4.30018	1	0.97388	66.8471
GOTERM_BP_DIRECT	GO:0010738~regulation of protein kinase A signaling	4	0.255428	0.0593943	P35376, E1BM36, E1BPU0, F1MYH5	1169	11	13824	4.30018	1	0.97388	66.8471
GOTERM_BP_DIRECT	GO:0045597~positive regulation of cell differentiation	5	0.319285	0.0596667	P28800, O18739, F1MVT6, E1BLU8, F1MF18	1169	18	13824	3.28486	1	0.972453	67.0197
GOTERM_BP_DIRECT	GO:0010719~negative regulation of epithelial to mesenchymal transition	5	0.319285	0.0596667	A4IFA5, A1L5C6, F1MNS7, E1BCJ0, E1BB77	1169	18	13824	3.28486	1	0.972453	67.0197
SMART	SM00560:LamGL	3	0.191571	0.0596953	F1N0A6, E1BF00, E1BP05	940	4	8740	6.9734	1	0.580802	58.2629
GOTERM_BP_DIRECT	GO:0032876~negative regulation of DNA endoreduplication	3	0.191571	0.0600399	G3X6R3, F1MNN4, O97594	1169	5	13824	7.0953	1	0.971185	67.255
GOTERM_BP_DIRECT	GO:0033169~histone H3-K9 demethylation	3	0.191571	0.0600399	E1BE97, F1MVT6, F1N685	1169	5	13824	7.0953	1	0.971185	67.255
GOTERM_BP_DIRECT	GO:0070417~cellular response to cold	3	0.191571	0.0600399	Q27968, Q5E9J6, E1BAL6	1169	5	13824	7.0953	1	0.971185	67.255
GOTERM_BP_DIRECT	GO:2000369~regulation of clathrin-mediated endocytosis	3	0.191571	0.0600399	F1MH24, Q27974, Q17R13	1169	5	13824	7.0953	1	0.971185	67.255
INTERPRO	IPR000884:Thrombospondin, type 1 repeat	10	0.63857	0.0601332	F1MVP0, O18739, E1BN99, P79331, F1MCY5, F1MRZ2, E1BE11, F1N303, E1BC50, F1MLA7	1405	60	16802	1.99312	1	0.644094	65.4602
GOTERM_CC_DIRECT	GO:0070062~extracellular exosome	196	12.516	0.060854	F1MMI6, Q2KHZ8, Q2KJH6, D3JUI8, F1N3U7, Q3T0N1, Q2KJH4, A7MBJ5, A6QM01, A0A0N9H4L2, Q2KHZ2, F1N269, Q3SYU7, E1BBS9, F1MDH3, Q9XT56, E1BFD5, F1N0Y1, E1BJV1, Q29RZ0, F1MSI2, F1MF78, E1BC50, F1MJ66, Q2KIM0, P10894, Q24K00, F1N5J8, E1B7V2, Q32LQ0, O62768, E1BGZ2, O62664, Q2KJJ8, Q58DG1, F1MSW0, E1BFV0, G3MY87, E1BB26, F1MW33, A6QNX5, P28800, Q58DW4, A5D7M6, E1BF00, P13384, F1N7Q7, E1BKX7, E1BK52, A7Y…	1262	2162	15461	1.11065	1	0.710466	60.5363
INTERPRO	IPR006594:LisH dimerisation motif	6	0.383142	0.0609268	Q3MHW3, A8E4N8, E1BEN8, E1BM42, A6QP77, F1MUS0	1405	26	16802	2.7597	1	0.645939	65.9567
GOTERM_CC_DIRECT	GO:0005737~cytoplasm	276	17.6245	0.0621995	Q5W5U4, F1MMI6, E1B7V7, E1B7V9, E1BMN0, A7MBJ5, Q2KJH4, Q58D78, F1N269, F1MK70, Q3SYU7, E1BC48, G3X6L9, F1MBL6, F1MDH3, Q2TBX0, E1BPM0, E1BND0, F1N1F1, Q1RMJ7, Q1LZH7, E1BFD5, Q05B81, A0A140T8C7, E1BJV1, E1B7H4, A4IFA0, F1MNU7, F1MSI2, F1N4I0, Q17R13, E1B8H0, F1N0J0, P10894, Q24K00, F1MWS5, Q647I9, F1N1E0, A7MB95, E1B7E1, Q32LQ0, E1BEP7, E1BLL5, F1MI99, A5PKG5, E1BNB3, E1BFV0, F1MDF1, E1BNS3, A4I…	1262	3109	15461	1.08759	1	0.707172	61.3654
GOTERM_BP_DIRECT	GO:0008217~regulation of blood pressure	7	0.446999	0.0627112	F1MN25, Q32LQ0, F1MU34, P02666, P28088, O62664, F1N1Q8	1169	34	13824	2.43466	1	0.973778	68.8929
SMART	SM00038:COLFI	4	0.255428	0.0633268	P02453, Q32S24, F1MJQ6, F1MTP1	940	9	8740	4.13239	1	0.591828	60.4938
INTERPRO	IPR000048:IQ motif, EF-hand binding site	12	0.766284	0.0635354	E1BKQ6, Q9BE39, F1MG13, E1BNV7, F1MMU9, F1MHG0, F1MYE9, Q9BE41, F1MMC7, Q27991, F1MNR3, A0JN59	1405	79	16802	1.81651	1	0.658743	67.5419
GOTERM_BP_DIRECT	GO:0007030~Golgi organization	10	0.63857	0.063548	E1BGU2, F1MHG5, E1BPC3, E1BJV1, O46382, E1BPU0, E1BK29, A6QQI6, E1BNH9, F1MBM9	1169	60	13824	1.97092	1	0.973331	69.3899
GOTERM_BP_DIRECT	GO:0016337~single organismal cell-cell adhesion	10	0.63857	0.063548	F1N0Y1, F1MJ11, F1MN25, E1BKL9, E1BPV1, E1BQ10, E1BC86, F1MWJ0, F1MT78, F1MUF6	1169	60	13824	1.97092	1	0.973331	69.3899
SMART	SM00239:C2	19	1.21328	0.0648389	E1BH60, F1MDC9, E1BB77, E1BPE2, F1N3I4, F1MBT5, F1N795, F1MF11, P10894, Q17QX4, E1B8D1, F1MBI8, E1BMQ1, A3KMV3, F1N7B7, E1B796, E1BPM0, F1N415, E1B7V2	940	115	8740	1.53617	1	0.589833	61.3895
GOTERM_BP_DIRECT	GO:0007411~axon guidance	13	0.83014	0.0660196	E1BE71, G3N1E4, A8E641, F1N008, F1MCY1, E1B7S6, F1MNK8, Q27991, Q5EA01, E1BLU8, F1MW33, Q2VWH6, F1MUS6	1169	88	13824	1.74695	1	0.975346	70.8143
GOTERM_CC_DIRECT	GO:0005794~Golgi apparatus	54	3.44828	0.0664217	E1BPC3, F1N693, Q32L40, E1B991, E1BK29, A7MBJ5, F1MF68, F1MK44, F1MHG5, A7MBC2, A5D7H2, O18739, A2VDU6, E1BNH9, F1MW55, A5D7P7, P26201, Q9BE41, E1BBJ7, E1BB52, F1MDC9, F1MAY4, F1MQI5, F1MUW6, E1BNR0, F1MWF0, Q5EA01, E1BNX9, A4FUE5, O62664, Q32LE2, F1MHX8, F1MLY7, A5D7F8, O02810, G3X6J7, A5D7F6, E1BGU2, Q28193, A6H7I9, F1MR06, E1BKJ5, Q32LN0, E1BKJ9, F1N7C2, F1N6H1, Q32PG1, E1BCG1, E1BIY5, F1MX25,…	1262	528	15461	1.25296	1	0.720468	63.8628
UP_SEQ_FEATURE	signal peptide	60	3.83142	0.0666518	Q9XSX7, Q2KHZ8, Q3YJF5, Q17QU7, Q2KJH6, A2VE29, P35246, P48733, P02453, Q32S24, O18739, K7QE74, K7QE75, A6QPK6, P0C6R3, F1MVI0, Q9XT56, G3MWT2, Q75UG4, F1MAU4, Q2KJF1, Q95L39, Q2KIM0, P03972, Q3T052, Q17QX3, O18767, P19111, Q32XW6, F1MLA7, A2VE93, P10064, A1A4K5, Q08DT3, A5PK46, Q28062, O62664, A5D7V5, Q08DX6, Q0VCX2, Q0VCT2, A7E2Z9, Q06805, Q5I2M5, Q28862, P28088, Q9GLR1, Q08DJ5, Q27968, P80012,…	305	1010	6267	1.22065	1	0.968908	66.8435
UP_SEQ_FEATURE	repeat:HEAT 3	3	0.191571	0.0673757	Q3SYU7, A7MBJ5, A2VE70	305	9	6267	6.84918	1	0.965169	67.2527
UP_SEQ_FEATURE	repeat:HEAT 2	3	0.191571	0.0673757	Q3SYU7, A7MBJ5, A2VE70	305	9	6267	6.84918	1	0.965169	67.2527
UP_SEQ_FEATURE	repeat:HEAT 1	3	0.191571	0.0673757	Q3SYU7, A7MBJ5, A2VE70	305	9	6267	6.84918	1	0.965169	67.2527
GOTERM_CC_DIRECT	GO:0016607~nuclear speck	16	1.02171	0.067435	E1BB52, A6QLC5, F1MLB1, E1BP77, A4FUD3, F1MYN8, E1BK18, E1BJ59, A5D7H5, F1MX77, P10894, F1MCY1, Q5E9J6, E1BHM5, G3MXN4, A5D7F6	1262	121	15461	1.61999	1	0.715407	64.4393
INTERPRO	IPR008250:P-type ATPase, A domain	7	0.446999	0.0675947	F1N7C2, E1BPC3, G3X6T7, A7Z029, Q0VCY0, F1MR06, E1BMQ6	1405	35	16802	2.39174	1	0.679129	69.871
INTERPRO	IPR001757:Cation-transporting P-type ATPase	7	0.446999	0.0675947	F1N7C2, E1BPC3, G3X6T7, A7Z029, Q0VCY0, F1MR06, E1BMQ6	1405	35	16802	2.39174	1	0.679129	69.871
GOTERM_CC_DIRECT	GO:0032039~integrator complex	4	0.255428	0.0682714	Q32LL5, Q1RMS6, E1BF57, E1B8S1	1262	12	15461	4.08373	1	0.709595	64.9087
SMART	SM00137:MAM	5	0.319285	0.0689738	F1MX14, F1MSW0, E1BMX5, F1MHX8, E1BPU9	940	15	8740	3.09929	1	0.602657	63.7436
GOTERM_BP_DIRECT	GO:0090630~activation of GTPase activity	10	0.63857	0.0692279	F1N0Y1, E1BH05, E1BP38, A5D793, A6QLC5, A6QQI6, F1MX58, Q08DT3, F1MM49, F1N3C5	1169	61	13824	1.93861	1	0.978097	72.57
GOTERM_BP_DIRECT	GO:0032024~positive regulation of insulin secretion	5	0.319285	0.0707177	Q0IIG5, Q0VCF8, F1MDC9, F1MJE0, A8KC68	1169	19	13824	3.11197	1	0.978487	73.351
GOTERM_BP_DIRECT	GO:0046580~negative regulation of Ras protein signal transduction	5	0.319285	0.0707177	F1N795, Q08E39, F1MBI8, E1BB77, E1BPM0	1169	19	13824	3.11197	1	0.978487	73.351
GOTERM_BP_DIRECT	GO:0043171~peptide catabolic process	5	0.319285	0.0707177	F1MVP0, Q32LQ0, F1MU34, F1MR63, F1N1Q8	1169	19	13824	3.11197	1	0.978487	73.351
GOTERM_CC_DIRECT	GO:0030027~lamellipodium	15	0.957854	0.0713897	A6QLC5, F1MCL8, F1MBM9, E1BPU9, F1MAY4, F1N269, A5D7F8, E1B9P1, E1BKL9, A6QLR4, G5E5G8, E1BKA3, F1MCP4, Q27991, E1BPY0	1262	112	15461	1.64078	1	0.716097	66.6084
INTERPRO	IPR022682:Peptidase C2, calpain, large subunit, domain III	4	0.255428	0.0724225	E1BI66, Q27970, F1MB09, F1N121	1405	12	16802	3.98624	1	0.702083	72.4363
INTERPRO	IPR009020:Proteinase inhibitor, propeptide	4	0.255428	0.0724225	Q28193, E1BEJ2, F1MCT1, Q9GLR1	1405	12	16802	3.98624	1	0.702083	72.4363
GOTERM_MF_DIRECT	GO:0000146~microfilament motor activity	4	0.255428	0.0731694	Q9BE39, E1BNV7, F1MHG0, Q27991	1100	12	13095	3.96818	1	0.898243	68.9213
GOTERM_BP_DIRECT	GO:0033365~protein localization to organelle	4	0.255428	0.0743731	E1BPP3, E1BMK9, E1BBS9, Q865S1	1169	12	13824	3.94183	1	0.981255	75.179
GOTERM_BP_DIRECT	GO:0060307~regulation of ventricular cardiac muscle cell membrane repolarization	4	0.255428	0.0743731	Q0VCR2, F1MXF5, Q2KJH4, Q0P5E6	1169	12	13824	3.94183	1	0.981255	75.179
GOTERM_CC_DIRECT	GO:0030286~dynein complex	5	0.319285	0.0746297	F1N724, F1N1K6, E1BLB4, F1MSP8, E1B9R5	1262	20	15461	3.0628	1	0.72277	68.2928
GOTERM_CC_DIRECT	GO:0033017~sarcoplasmic reticulum membrane	5	0.319285	0.0746297	E1BDQ4, F1MHA5, E1BE29, Q0VCY0, E1BMQ6	1262	20	15461	3.0628	1	0.72277	68.2928
SMART	SM00317:SET	8	0.510856	0.0750958	Q32PH7, F1MFD2, E1BLX2, E1BBB5, F1N6Y5, A6QPM3, F1MHA1, E1B9N8	940	35	8740	2.12523	1	0.624746	66.985
GOTERM_MF_DIRECT	GO:0003730~mRNA 3'-UTR binding	7	0.446999	0.0768544	F1N2B8, F1MV20, Q2TBT7, F1MZU1, E1BPT6, Q0VCU0, E1BMA4	1100	36	13095	2.31477	1	0.901636	70.7683
INTERPRO	IPR015424:Pyridoxal phosphate-dependent transferase	8	0.510856	0.0779599	Q0VCA1, A6QLI6, A7MBC2, Q3MHG1, A0A140T896, Q17QF0, P12344, F1N6X2	1405	45	16802	2.12599	1	0.726559	75.125
INTERPRO	IPR015421:Pyridoxal phosphate-dependent transferase, major region, subdomain 1	8	0.510856	0.0779599	Q0VCA1, A6QLI6, A7MBC2, Q3MHG1, A0A140T896, Q17QF0, P12344, F1N6X2	1405	45	16802	2.12599	1	0.726559	75.125
INTERPRO	IPR000571:Zinc finger, CCCH-type	9	0.574713	0.0782425	A1A4K6, E1B8I9, A5D7H8, E1BCT9, Q17QY2, F1MV20, A2VDX6, F1MCW9, E1BF96	1405	54	16802	1.99312	1	0.725	75.2553
GOTERM_BP_DIRECT	GO:0009566~fertilization	7	0.446999	0.0788667	E1BNR0, F1MGY6, E1BL69, F1N2F6, F1MUF6, Q647I9, E1BD55	1169	36	13824	2.2994	1	0.984343	77.2642
INTERPRO	IPR027267:Arfaptin homology (AH) domain/BAR domain	6	0.383142	0.0794467	F1MJ96, F1MKZ2, F1MFA5, Q08DK5, A5PK26, E1BNG8	1405	28	16802	2.56258	1	0.727773	75.8036
INTERPRO	IPR002909:Cell surface receptor IPT/TIG	6	0.383142	0.0794467	E1BK86, E1BFR4, G3X755, F1MSU2, E1BFT2, F1MNR3	1405	28	16802	2.56258	1	0.727773	75.8036
UP_KEYWORDS	Zinc	104	6.64112	0.0797538	E1BNV7, F1N3U7, A5D7L9, A4IF62, E1BM64, Q32PH7, F1MU53, Q2TBX0, E1BFT2, F1MFV9, A8E651, A5PJN8, F1MTS8, E1BCT9, F1MWS5, A0A0H3V687, Q9XSB5, E1BJV5, A6H735, F1MUS6, Q32LQ0, Q0VCA5, F1MHX5, E1BPS3, P28339, Q0VFX8, A5D7F8, A6QR47, E1BJS7, F1MX73, Q2TBV5, Q08DF2, Q5E9J6, F1MSW0, Q1RMU2, E1BDU8, E1BBN5, E1BNA9, E1BIX5, A6QLI8, F1MRX7, E1BEG4, F1N3F6, E1B7X3, E1BAY5, E1B9D8, F1N038, E1BQ25, A6QR55, F1M…	1470	1091	17808	1.1548	1	0.819897	67.5927
GOTERM_CC_DIRECT	GO:0034991~nuclear meiotic cohesin complex	3	0.191571	0.0799517	E1BL69, E1B9B0, O97594	1262	6	15461	6.12559	1	0.738687	70.8887
SMART	SM00033:CH	11	0.702427	0.0800698	F1MQA8, F1MHF3, E1BKX7, E1BJV1, Q2HJ38, A4IFA0, F1MRT9, F1MBM9, F1MF78, G3MWR8, A6H735	940	57	8740	1.79433	1	0.639237	69.418
INTERPRO	IPR000421:Coagulation factor 5/8 C-terminal type domain	5	0.319285	0.080137	F1MYL5, A4IFG2, Q28107, E1BMX5, F1MLA7	1405	20	16802	2.98968	1	0.728124	76.1128
GOTERM_MF_DIRECT	GO:0031418~L-ascorbic acid binding	5	0.319285	0.0811248	P10731, A7MB83, Q75UG4, A4FUY3, Q3MI03	1100	20	13095	2.97614	1	0.90642	72.7803
INTERPRO	IPR000483:Cysteine-rich flanking region, C-terminal	11	0.702427	0.0813712	F1MMI6, E1BN69, A4IFA5, F1MUR6, F1N3H2, E1BIT3, E1BC86, A6QLD0, E1BDP0, G3MY74, G3N181	1405	73	16802	1.802	1	0.730945	76.6562
GOTERM_BP_DIRECT	GO:0050885~neuromuscular process controlling balance	8	0.510856	0.0815974	E1B7S6, F1MXG8, Q27991, F1MNR3, E1BLU8, A8KC68, F1MBT5, F1N1E0	1169	45	13824	2.10231	1	0.985541	78.4492
GOTERM_BP_DIRECT	GO:0008104~protein localization	8	0.510856	0.0815974	A8WEE6, F1MB52, F1MFB2, F1MNK8, E1BLM2, G3N1E4, F1MF64, F1N1F1	1169	45	13824	2.10231	1	0.985541	78.4492
GOTERM_BP_DIRECT	GO:0030032~lamellipodium assembly	6	0.383142	0.082433	E1B9P1, E1BKA3, F1N008, F1MBM9, E1BPY0, F1MAY4	1169	28	13824	2.53403	1	0.985193	78.8001
SMART	SM00032:CCP	10	0.63857	0.0824952	F1N3H5, F1MRN5, A6QLQ2, E1BJ49, F1MNH3, E1BF00, Q28062, F1MQ74, E1BCJ2, E1BK92	940	50	8740	1.85957	1	0.640883	70.5429
GOTERM_BP_DIRECT	GO:0048675~axon extension	5	0.319285	0.0827344	E1BPM7, F1MFB2, G5E630, E1BLU8, E1BNR9	1169	20	13824	2.95637	1	0.984418	78.9252
GOTERM_MF_DIRECT	GO:0030246~carbohydrate binding	13	0.83014	0.0828384	F1MN25, E1BGJ4, E1BKQ9, Q3SX24, P35246, E1BJ49, Q28062, E1BK92, E1BBP1, A6QNJ8, G3MY87, F1MVI0, F1N554	1100	92	13095	1.68216	1	0.90372	73.5506
GOTERM_CC_DIRECT	GO:0042383~sarcolemma	9	0.574713	0.0829756	E1BDQ4, F1MHA5, E1BE29, E1BB91, E1BNT9, F1MRT9, E1BI98, F1MR06, Q0P5E6	1262	56	15461	1.96894	1	0.743156	72.2739
SMART	SM00508:PostSET	4	0.255428	0.0834602	Q32PH7, E1BLX2, F1MHA1, E1B9N8	940	10	8740	3.71915	1	0.635797	70.9797
SMART	SM00472:MIR	4	0.255428	0.0834602	Q9TU34, E1BDQ4, F1MHA5, E1BE29	940	10	8740	3.71915	1	0.635797	70.9797
SMART	SM00323:RasGAP	4	0.255428	0.0834602	F1N795, F1MBI8, E1BB77, E1BPM0	940	10	8740	3.71915	1	0.635797	70.9797
INTERPRO	IPR004166:MHCK/EF2 kinase	3	0.191571	0.0834663	F1MKY9, E1BMC1, F1MPF0	1405	6	16802	5.97936	1	0.73751	77.5522
INTERPRO	IPR006576:BRK domain	3	0.191571	0.0834663	E1BPM4, A7Z019, A5PKK5	1405	6	16802	5.97936	1	0.73751	77.5522
SMART	SM00192:LDLa	9	0.574713	0.084287	F1N6H1, G3MX13, E1BCJ0, F1N590, F1MER7, F1MDE1, F1MLY9, E1BGJ0, F1MLA7	940	43	8740	1.94607	1	0.630273	71.3491
GOTERM_BP_DIRECT	GO:0014808~release of sequestered calcium ion into cytosol by sarcoplasmic reticulum	3	0.191571	0.0851087	E1BDQ4, E1BE29, A4IFQ8	1169	6	13824	5.91275	1	0.985295	79.8875
GOTERM_BP_DIRECT	GO:0010457~centriole-centriole cohesion	3	0.191571	0.0851087	E1BPP3, E1BMK9, E1BBS9	1169	6	13824	5.91275	1	0.985295	79.8875
GOTERM_BP_DIRECT	GO:0042796~snRNA transcription from RNA polymerase III promoter	3	0.191571	0.0851087	Q17QY2, E1BK18, F1MS14	1169	6	13824	5.91275	1	0.985295	79.8875
GOTERM_BP_DIRECT	GO:0060059~embryonic retina morphogenesis in camera-type eye	3	0.191571	0.0851087	F1MW00, E1BHG3, F1MDE1	1169	6	13824	5.91275	1	0.985295	79.8875
GOTERM_BP_DIRECT	GO:0032000~positive regulation of fatty acid beta-oxidation	3	0.191571	0.0851087	F6RLQ6, F1MYE0, F1MJE0	1169	6	13824	5.91275	1	0.985295	79.8875
GOTERM_CC_DIRECT	GO:0043197~dendritic spine	7	0.446999	0.0852149	G3N3K3, Q2TBT7, Q08DM6, Q0VD07, F1N008, Q27991, F6R8E7	1262	38	15461	2.2568	1	0.744034	73.2599
UP_KEYWORDS	Actin-binding	17	1.08557	0.0854874	E1BJV1, Q9BE39, A7Z063, Q2HJ38, Q3B7M5, F1MHG0, Q2KJH4, F1MMC7, F1MF78, G3MWR8, F1N269, E1BKX7, F1MRT9, Q27991, Q9BE41, Q32LP9, Q0P5E6	1470	134	17808	1.53689	1	0.823549	70.2255
GOTERM_MF_DIRECT	GO:0005543~phospholipid binding	8	0.510856	0.0871269	F1MKP9, E1BNR0, E1BC19, F1MFA5, F1N3I4, E1BPS3, F1MG90, F1N1Q7	1100	46	13095	2.07036	1	0.908165	75.3901
INTERPRO	IPR003616:Post-SET domain	4	0.255428	0.0885073	Q32PH7, E1BLX2, F1MHA1, E1B9N8	1405	13	16802	3.67961	1	0.756118	79.5772
INTERPRO	IPR005113:uDENN domain	4	0.255428	0.0885073	F1MLZ5, G5E5Q8, F1MQ87, A5D7B4	1405	13	16802	3.67961	1	0.756118	79.5772
INTERPRO	IPR002404:Insulin receptor substrate-1, PTB	4	0.255428	0.0885073	F1MYE0, F1N754, F1MDH3, F1MJE0	1405	13	16802	3.67961	1	0.756118	79.5772
INTERPRO	IPR000949:ELM2 domain	4	0.255428	0.0885073	F1ML55, E1BFC1, E1BI11, F1MGR3	1405	13	16802	3.67961	1	0.756118	79.5772
INTERPRO	IPR022684:Peptidase C2, calpain family	4	0.255428	0.0885073	E1BI66, Q27970, F1MB09, F1N121	1405	13	16802	3.67961	1	0.756118	79.5772
INTERPRO	IPR024607:Sulfatase, conserved site	4	0.255428	0.0885073	F1MU84, F1N2D5, E1BIY5, F1MFZ8	1405	13	16802	3.67961	1	0.756118	79.5772
GOTERM_BP_DIRECT	GO:0016180~snRNA processing	4	0.255428	0.0908316	Q32LL5, Q1RMS6, E1BF57, E1B8S1	1169	13	13824	3.63861	1	0.988295	82.039
GOTERM_BP_DIRECT	GO:0051642~centrosome localization	4	0.255428	0.0908316	Q24K00, E1BMB1, A6QLV1, F1MF78	1169	13	13824	3.63861	1	0.988295	82.039
GOTERM_BP_DIRECT	GO:0050910~detection of mechanical stimulus involved in sensory perception of sound	4	0.255428	0.0908316	F1MDD1, A1L5C6, F1MW07, G3MYD4	1169	13	13824	3.63861	1	0.988295	82.039
GOTERM_BP_DIRECT	GO:0007064~mitotic sister chromatid cohesion	4	0.255428	0.0908316	E1BKG4, E1BL69, O97594, F1N7G8	1169	13	13824	3.63861	1	0.988295	82.039
GOTERM_BP_DIRECT	GO:0035556~intracellular signal transduction	31	1.97957	0.0915701	E1B7V7, F1MRL0, A5PK06, E1BNV7, F1MDI4, F1MBT5, Q8HXA6, F1N795, F1N657, G5E5G8, E1BHE7, E1BGX7, E1BPM0, E1BH25, A7Z039, F1N1Q7, F1MCG9, E1BK34, E1BH60, E1BK33, P19754, A5D793, F1MDC9, E1BK14, E1B7J3, F1MMW6, P10894, F1N2G5, E1BFR5, F1MN63, A5PJL4	1169	276	13824	1.32823	1	0.987938	82.3002
SMART	SM00571:DDT	3	0.191571	0.0925163	F1N3U7, F1N6I8, E1BN25	940	5	8740	5.57872	1	0.657075	74.7953
INTERPRO	IPR006207:Cystine knot, C-terminal	5	0.319285	0.0927385	P80012, O18739, F2FB42, F2FB40, F1MLA7	1405	21	16802	2.84731	1	0.770174	81.1428
SMART	SM00072:GuKc	6	0.383142	0.0930119	F1MSI9, F1MEC0, E1B7V9, E1BLW4, E1BGZ5, E1BM96	940	23	8740	2.42553	1	0.650286	74.99
GOTERM_MF_DIRECT	GO:0005540~hyaluronic acid binding	5	0.319285	0.0938589	F1N2J5, F1MYW1, E1BBU2, E1BKX1, Q28062	1100	21	13095	2.83442	1	0.917994	78.0381
UP_SEQ_FEATURE	repeat:2-12	2	0.127714	0.0946705	Q6H236, Q28107	305	2	6267	20.5475	1	0.989821	79.6428
UP_SEQ_FEATURE	repeat:2-6	2	0.127714	0.0946705	Q6H236, Q28107	305	2	6267	20.5475	1	0.989821	79.6428
UP_SEQ_FEATURE	domain:PDZ 3	2	0.127714	0.0946705	Q3T0X8, E1BK26	305	2	6267	20.5475	1	0.989821	79.6428
UP_SEQ_FEATURE	repeat:2-10	2	0.127714	0.0946705	Q6H236, Q28107	305	2	6267	20.5475	1	0.989821	79.6428
UP_SEQ_FEATURE	domain:TIL 1	2	0.127714	0.0946705	P80012, F1MLA7	305	2	6267	20.5475	1	0.989821	79.6428
UP_SEQ_FEATURE	repeat:2-5	2	0.127714	0.0946705	Q6H236, Q28107	305	2	6267	20.5475	1	0.989821	79.6428
UP_SEQ_FEATURE	domain:VWFD 2	2	0.127714	0.0946705	P80012, F1MLA7	305	2	6267	20.5475	1	0.989821	79.6428
UP_SEQ_FEATURE	domain:TIL 2	2	0.127714	0.0946705	P80012, F1MLA7	305	2	6267	20.5475	1	0.989821	79.6428
UP_SEQ_FEATURE	compositionally biased region:Poly-Asn	2	0.127714	0.0946705	A0JN40, A5D7F6	305	2	6267	20.5475	1	0.989821	79.6428
UP_SEQ_FEATURE	domain:VWFD 3	2	0.127714	0.0946705	P80012, F1MLA7	305	2	6267	20.5475	1	0.989821	79.6428
UP_SEQ_FEATURE	repeat:2-13	2	0.127714	0.0946705	Q6H236, Q28107	305	2	6267	20.5475	1	0.989821	79.6428
UP_SEQ_FEATURE	repeat:2-11	2	0.127714	0.0946705	Q6H236, Q28107	305	2	6267	20.5475	1	0.989821	79.6428
UP_SEQ_FEATURE	repeat:2-7	2	0.127714	0.0946705	Q6H236, Q28107	305	2	6267	20.5475	1	0.989821	79.6428
UP_SEQ_FEATURE	domain:VWFD 1	2	0.127714	0.0946705	P80012, F1MLA7	305	2	6267	20.5475	1	0.989821	79.6428
UP_SEQ_FEATURE	repeat:2-8	2	0.127714	0.0946705	Q6H236, Q28107	305	2	6267	20.5475	1	0.989821	79.6428
UP_SEQ_FEATURE	repeat:2-9	2	0.127714	0.0946705	Q6H236, Q28107	305	2	6267	20.5475	1	0.989821	79.6428
GOTERM_BP_DIRECT	GO:0051091~positive regulation of sequence-specific DNA binding transcription factor activity	10	0.63857	0.0950235	E1BK34, F1MW00, F1MK64, F1N2G5, A7Z019, F1MNS7, E1BLE3, F1MM51, Q9XSB5, F1MDE1	1169	65	13824	1.81931	1	0.989159	83.475
SMART	SM00242:MYSc	8	0.510856	0.0956186	E1BKQ6, Q9BE39, F1MG13, E1BNV7, F1MHG0, Q9BE41, F1MMC7, Q27991	940	37	8740	2.01035	1	0.652316	75.9912
GOTERM_BP_DIRECT	GO:0043044~ATP-dependent chromatin remodeling	5	0.319285	0.0956795	F1N4N6, E1B925, A7Z019, F1N3F6, E1BJD1	1169	21	13824	2.81559	1	0.988782	83.6896
GOTERM_BP_DIRECT	GO:0003341~cilium movement	5	0.319285	0.0956795	F1N724, G3N1C8, F1N5R7, F1N6M5, E1BED7	1169	21	13824	2.81559	1	0.988782	83.6896
SMART	SM00214:VWC	7	0.446999	0.0957962	P02453, P80012, O18739, F1N740, F2FB42, F2FB40, F1MLA7	940	30	8740	2.1695	1	0.644585	76.0581
UP_SEQ_FEATURE	domain:IQ	3	0.191571	0.0966237	Q9BE39, Q9BE41, Q27991	305	11	6267	5.60387	1	0.988886	80.3344
KEGG_PATHWAY	bta04975:Fat digestion and absorption	7	0.446999	0.0978555	F1N3K2, F1N3L2, E1BNR0, A5PK46, E1BPS5, P26201, P12344	539	45	7550	2.17893	1	0.81834	74.0779
GOTERM_CC_DIRECT	GO:0005813~centrosome	34	2.17114	0.0980751	G5E5A1, F1MB52, F1MXF5, E1B7K5, Q3T0N1, E1BPE2, Q3MHV6, E1BK25, A5PK21, E1BK86, E1BH05, E1BC48, E1BNH9, Q1RMU2, E1BG09, A0JN80, Q0III3, Q28141, E1BHT5, E1BPP3, E1BMB1, F1N7I5, A6QQU8, F1MH68, E1BD55, F1MKZ7, A3KMW7, A2VDQ0, E1BFR5, G3N029, E1BDX8, F1N3F6, A6QQR4, F1MM88	1262	321	15461	1.29763	1	0.785792	78.3177
INTERPRO	IPR009057:Homeodomain-like	29	1.85185	0.0991114	F1N4N6, E1BNZ8, F1N693, A6QLC9, E1BFC1, E1BME7, G3N133, F1MPW8, F1MGR3, Q29RK2, E1BGF9, E1BIZ2, E1BMQ3, F1MP31, Q2HJ84, E1BCL1, F1MD26, E1BLU8, F1MEB1, E1BNQ7, F1MGM4, F1ML55, G3X7K5, E1BI11, E1BPV9, A8KC64, G3MY25, E1B741, F1MMS4	1405	260	16802	1.33386	1	0.79087	83.289

## Sheet: Common
165 common elements in "List 1", "List 2" and "List 3":	HEIFER									LACTATION									PREGNANT
	PValue	Genes	List Total	Pop Hits	Pop Total	Fold Enrichment	Bonferroni	Benjamini	FDR	PValue	Genes	List Total	Pop Hits	Pop Total	Fold Enrichment	Bonferroni	Benjamini	FDR	PValue	Genes	List Total	Pop Hits	Pop Total	Fold Enrichment	Bonferroni	Benjamini	FDR
Coiled coil	5.14046e-20	A7Z017, F1MNV8, E1BJE1, F1N4J1, F1N3U6, E1BGE2, A3KN07, F1N264, E1BC41, F1N469, E1B9R5, F1MD64, F1MM72, E1BBS9, F1MBL6, Q3B7M7, F1MG71, F1MDH3, E1BND2, F1N0Y1, Q2HJ91, G3MZJ5, F1MXE2, E1BNU3, F1MTK5, F1MF78, F1MPV5, A4IFP2, A7MBK1, A7MB96, A5PKJ6, E1BL71, A5PKJ3, F1MD77, E1BBT9, F1MRD8, E1B9B0, F1MQI1, G5E556, G3X7Z2, F1N1E0, E1B7E2, E1B7E3, F1MFW9, F1MGT1, F1MXF5, F1MH50, F1MPW8, P35605, A6QLQ3,…	1884	2319	17808	1.54073	1.69635e-17	1.69635e-17	6.96898e-17	1.31992e-21	E1BAS3, E1BKE7, E1BKE1, F1MNV8, A6QNV7, E1BNV7, E1BP75, Q3B7N2, E1BJE7, F1N264, E1B9R5, F1MQ69, F1MSI9, F1MD64, E1BC48, G3X6L9, F1MBL6, F1MG71, F1MDH3, F1N1F0, A5PKI1, Q1LZH7, F1N0Y1, E1BJV1, G3MZJ5, G3MX98, F1MPV3, F1MF78, F1MPV5, F1MEG3, E1BJV9, P55203, E1B9B0, G5E556, F1MQI1, E1B7E3, E1BP93, F1N192, F1MXF5, F1MH50, F1N2W4, F1MPW8, G3MWW2, A6QLQ3, F1MQ85, A5D7N7, E1BJC6, F1MK91, F1MJ53, F1MK99,…	1470	2319	17808	1.65598	3.97297e-19	3.97297e-19	1.76471e-18	8.91661e-19	E1BEN8, E1BKE1, A7Z019, E1BNV7, F1N3U7, F1MHG0, E1B9R5, F1MSI9, E1BET1, E1BC48, E1BBS9, G3X6L9, A2VDU6, F1MBL6, F1MX58, F1MG71, F1MDH3, F1MW55, E1BHM5, Q1LZH7, F1N0Y1, F1MFV9, E1BJV1, F1MXE5, G3MZJ5, E1B7H4, F1MH68, E1BNU3, F1MTK5, F1MF78, F1MAY4, F1MJ66, F1MEG3, F1MWS5, F1MWF0, E1B9B0, F1MQI1, F1N1E0, F1N099, E1BN16, F1MXF5, E1BNT9, F1MHX5, F1MPW8, E1BF37, F1MQ85, E1BJS7, E1BNB3, Q32LP9, A6QPQ0,…	1470	2319	17808	1.60375	2.94248e-16	2.94248e-16	1.20883e-15
IPR016024:Armadillo-type fold	1.77055e-18	A7YY22, E1BC85, F1MKS6, E1B7K5, F1MF64, F1MVD5, A7MBJ5, P49951, G5E630, E1BGE2, A6QM02, F1MFZ5, Q3ZBE1, E1B847, F1N463, F1MBL6, E1BN24, E1BE82, E1B8S1, Q865S1, E1BND2, A7MB67, E1BPB3, F1MJP6, E1BPI7, E1BPV1, E1B7C4, G3X6R3, E1B717, F1MI29, F1MZA7, E1BNY9, F1MX04, F1MDR7, E1BM39, E1BP38, A5D7C4, E1BNR0, E1BE98, A7E2Y6, E1B9B0, A6QPT0, E1BMG8, E1BH40, E1BE66, E1BK00, F1MPS0, E1BM83, F1MKU0, E1BPS4,…	1806	314	16802	2.66659	4.06342e-15	4.06342e-15	3.09304e-15	1.08093e-16	A0A0C5AVL2, E1BFA8, E1BKE1, E1BPU0, F1MME0, F1MKS6, P49951, A7MBJ5, F1MF68, A6QM02, A1A4I8, E1B847, F1MBL6, Q1RMS6, F1MV51, E1B883, E1B8S1, F1MJ73, E1BI79, E1BPI7, E1B718, E1B8C2, E1BHR5, F1MI29, E1BEI6, F1MZA7, E1BNY9, F1MDR7, E1BM39, E1BP38, E1BHD7, F1N0A8, E1BNR0, A7E2Y6, F1MUF1, E1B9B0, E1BKG4, E1BMG8, E1BH40, E1BK00, E1BM83, G3X6U0, E1BGC3, E1BMC4, F1N1C8, E1BNT2, E1BPS3, F1MLY7, F1MZK4, F1M…	1411	314	16802	2.84424	2.20823e-13	2.20823e-13	1.88738e-13	3.20994e-20	A7Z051, E1BKE1, E1BPU0, E1B7K5, F1MF64, A7MBJ5, P49951, G5E630, F1MF68, A2VE70, A7MBF6, A6QM02, E1B8D1, F1N463, E1B847, Q3SYU7, F1MBL6, Q1RMS6, E1B8S1, Q865S1, F1MSC0, E1BLD1, E1BPI7, E1BPV1, E1B7C4, G3X6R3, E1BC19, E1BEI6, F1MZA7, E1BP36, Q9TU34, F1MJ11, F1MX04, E1BGE5, F1MDR7, E1BM39, F1MTS8, E1BP38, F1N0A8, E1BNR0, A5D7C2, Q0P5A6, F1MUF1, E1B9B0, A2VE08, E1BKG4, E1BH40, F1MPS0, G3X6U0, F1MC39,…	1405	314	16802	3.08489	6.25617e-17	6.25617e-17	5.50227e-17
GO:0005654~nucleoplasm	8.29885e-10	E1BJE9, A7Z018, E1B7V9, Q1LZ90, F1MPE9, A7MBJ5, Q865V6, F1N264, F1N469, F1N463, F1MNE1, Q3B7M6, F1MIV1, E1B885, F1N0Y1, E1BAT5, F1N0Y9, F1N1V3, F1N4I0, E1B8H0, A5D7K6, G3MX91, F1N4Z5, E1BJV8, E1B7E3, E1BFC2, F1MGT1, E1B7X9, A5PK74, Q3SZD1, F1N281, P09867, F1MTI9, E1BHK2, A6QR44, Q1LZF1, F1MT98, E1BNS3, F1N3G4, E1BL90, P27925, F1MP88, F1MWC0, F1MHF3, P00727, F1MX61, F1N7Q0, A6QQ10, F1MYK3, G3MXV0,…	1648	1310	15461	1.49677	5.59342e-07	5.59342e-07	1.24518e-06	5.39399e-05	E1BIF0, E1BKE7, F1MPE9, A7YW98, E1BJ63, E1BNL6, A7MBJ5, F1MVD0, G3X746, E1BIU7, A7MB37, F1N264, A6H727, F1MEM4, F1MNE1, A7MBC5, E1BC48, Q2TBX0, A6QNN6, E1B885, E1BFD5, F1N0Y1, E1BPM6, E1BE55, E1BDD9, E1BAT5, F1N0Y9, E1BJD1, A6QQ84, E1B9Q4, F1MLM2, A8KC64, Q0VBZ5, Q2T9X2, Q0QEX9, F1N4Z5, D2KFG0, F1N2I0, F1CYZ1, F1MUF1, E1B8X8, E1BCE6, E1B7E3, E1BKG4, E1BEZ8, F1N2W4, E1BL06, E1BPS7, E1BC64, F1MAZ9,…	1297	1310	15461	1.36495	0.0325253	0.0109615	0.0798691	8.83727e-07	E1BIF0, E1B7V9, A6QLW0, F1MN32, F1N3U7, Q3T0N1, A0JNC9, A7MBJ5, F1MVD0, G3X746, A2VDM7, A3KMV6, F1N463, E1BC48, F1MW55, Q2TBX0, F1MVT6, Q5EA36, A6QNN6, E1BFD5, F1N0Y1, A2VDN6, A7Z029, E1BDD9, F1N0Y9, F1MB09, F1N7E7, Q2T9P4, F1N4I0, E1BJD1, E1B8H0, A8KC64, A1A4H5, E1BGE5, Q5EAD3, F1N5J8, F1N2I0, F1MUF1, F1N6S4, E1BJV5, A7MB95, E1BKG4, Q0VCA5, F1MC39, F1N015, P28339, E1BGF9, E1BNB3, E1BIZ2, Q58DG1,…	1262	1310	15461	1.45892	0.000540695	0.000540695	0.00130873
IPR001881:EGF-like calcium-binding	3.23259e-08	Q2KIT5, E1BDN7, F1MYW1, Q28019, F1MPE9, E1BPS6, P48733, E1BGE0, G3X812, G3X6N5, E1B949, F1MN54, F1MLJ7, E1BL59, A4FV93, F1MXE0, F1MKV7, F1MC84, F1MSI2, E1BE11, E1BNJ1, G3N1F4, F1N2V0, E1BGJ0, F1N444, E1B9K4, F1N6H1, F1MHH5, F1N6Y9, E1BJ11, Q5E9P5, F1MER7, F1MZD0, F1MNH3	1806	111	16802	2.8497	7.41852e-05	1.85468e-05	5.64713e-05	6.02906e-11	A6QQT1, F1N570, F1N2Y8, F1MYW1, P98133, F1MPE9, E1BPS6, P48733, G3X812, E1B949, F1MN54, Q95116, A3KN33, A7YY58, E1BGJ5, F1MXE0, E1BEY2, A7E306, F1MKV7, F1MJF1, Q28178, E1BE11, E1BPT8, E1BNJ1, F1MFI4, E1BGJ0, E1B9K4, F1N6H1, A2VE41, F1MVS9, F1MHH5, F1MER7, F1MNH3, E1BMV3	1411	111	16802	3.64745	1.19918e-07	2.99795e-08	1.03592e-07	0.000815103	F1MYW1, F1MSI2, E1BE11, E1BPS6, P48733, E1BJ49, F1MQ74, E1BGJ0, E1BGE0, E1B9K4, G3X812, E1BKL9, F1N6H1, G3X6N5, F1MD94, F1MHH5, F1N6Y9, F1MTZ4, F1MER7, F1MNH3, E1BMV3	1405	111	16802	2.26246	0.795928	0.0456679	1.38804
IPR011993:Pleckstrin homology-like domain	7.16671e-08	F1MDV3, F1MNV2, F1MF64, G3MZZ8, F1MLR9, F1MBT5, O97902, F1N657, F1MYE0, G5E5Q8, A6QLS6, E1BHX7, F1MM72, E1BNH5, F1MJV1, F1MDH3, A4IFL7, F1MLJ5, F1N1Q7, F1MQ30, E1BPM7, E1B7C4, F1N6I9, E1B716, E1BMD4, F1MZA2, Q29RM4, A7MB96, F1MUS9, P10895, P10894, F1MGG8, F1MRH8, E1BCP6, F1MSU8, G5E5L9, F1MQI1, F1MQ44, E1BEL4, F1MIM9, E1BNT8, F1MH50, Q1KZG5, A7Z032, F1MJE0, E1BJC1, E1BPA1, F1MRW6, F1MYC9, A6QPQ3,…	1806	382	16802	1.8753	0.000164463	3.28947e-05	0.000125198	1.49715e-07	F1MXS1, E1BKE7, E1BGX4, F1MPJ6, G3X6D0, E1BIQ2, E1BAW4, A6QR57, G3X783, F1MHG5, O97902, F1N657, F1MQJ7, F1MW59, F1MJV1, F1MDH3, E1BGX7, F1MYE9, E1BKY4, E1BB02, F1MQ30, E1BPM7, F1N6I9, Q2KJ24, A5PK34, F1N371, E1BJR7, E1B7L9, F1MUS9, E1BE90, F1MTH3, E1BJV9, F1MSU8, F1MQI1, G3N3E1, F1N214, E1BEZ8, E1BIH4, F1MH50, Q1KZG5, F1MJE0, F1MD97, Q32PJ7, A6QLU3, E1BPS3, E1BDQ0, F1N5N3, G3N2B1, A6QP95, F1MG90,…	1411	382	16802	1.99504	0.000297739	3.30865e-05	0.000257242	1.00459e-08	A7YWQ4, F1MF64, F1MHG0, A5PK26, G5E580, F1MBT5, F1N611, F1MHG5, F1N657, F1N795, F1MYE0, G5E5Q8, E1BNH5, F1MW59, Q3ZCE1, F1N754, F1MDH3, F1MX58, E1BGX7, F1MYE9, E1BPM0, F1MLJ5, F1N1Q7, E1BPM7, E1B7C4, E1BC19, A5PK34, E1BG38, P10894, F1MKP9, F1MSU8, F1MQI1, Q0P5E6, F1N214, F1MTN6, G5E6T2, F1MJE0, G3X6F7, E1BPS3, E1BH05, E1B9P1, G3N2B1, F1MXJ6, F1MG90, A7Z039, F1MCG9, A6QPU2, E1BH60, F1MFX6, A5D793,…	1405	382	16802	2.09747	1.95792e-05	6.52645e-06	1.722e-05
GO:0003682~chromatin binding	7.82797e-08	A7Z018, F1N616, F1MGR9, A7MBB7, E1BGA4, A4IFD2, F1MGR3, F1N264, Q2NKY8, Q8SQ19, Q3B7M7, A4FV76, E1BNH8, E1BKA3, F1MZE3, Q2KHY5, F1MMF1, E1BQ37, F1N7E7, A7MB41, F1MBB0, A5D7K6, A6H737, F1MD32, E1BPY4, F1MMY4, F1MSU6, F1N551, F1N215, A7Z034, A6QPT6, F1MPS0, G3MX46, Q6T8E9, F1MC39, G3N361, Q08DJ8, E1BCU5, F1MTR3, Q5EAB2, E1B7Q6, F1MCY1, F1MPD5, G3X6J7, E1BKC4, Q1LZF1, E1BBH8, E1BNS3, E1B7A1, F1MQ55,…	1418	308	13095	1.97889	7.25627e-05	7.25627e-05	0.000122484	1.32407e-05	E1B9V4, E1BIF0, F1N616, F1MME0, F1MGR3, A1A4I4, F1N264, Q32S26, A6H727, Q9BDI3, E1BNH8, A6QPK5, F1N1F0, E1BGW5, E1B9Q4, E1BPY4, G5E5H1, D2KFG0, E1BH37, F1MMU3, E1B6Z5, F1N215, Q2KJ94, E1BMC0, Q2KIA0, F1MI56, F1MQ85, Q0VCT9, E1BNK2, F1MCY1, F1MS13, E1BKC4, E1BBH8, E1BBZ8, E1BNS3, Q58DC8, E1B7A1, A7YW40, A6QP26, F1N2B6, F1N3G4, F1MP49, F1MSG4, E1BLK1, F1MY77, Q3SZ20, F1MM81, Q9GMA3, F1MNH3	1083	308	13095	1.92363	0.0111392	0.00279651	0.0204719	8.10187e-07	E1B7V5, F1N4N6, E1BIF0, A7Z019, E1BPU6, D3JUI8, A1L503, F1MGR3, A4IF62, E1BKA3, E1BL69, E1BLU8, E1BII2, A0A140T8C7, F1N7W4, E1BGW5, E1BQ37, F1N7E7, A2VDR6, F1N0J0, G5E5H1, E1B6Z5, Q2VWH6, F1N551, F1MPS0, E1BMC0, F1MQ85, E1BPF2, F1MC39, P28339, F1MCY1, E1BIC4, G3X6J7, E1BCC6, E1BKC4, E1BBH8, F1MHA1, E1BNS3, E1B7A1, E1BI59, A9CR99, F1MP49, E1BLK1, E1BBB8, F1MM81, Q0V8B7, F1MPG0, Q29RT0, G3N029, A6Q…	1100	308	13095	2.04851	0.000657656	0.000164454	0.00124606
IPR000742:Epidermal growth factor-like domain	1.00114e-07	E1BDN7, Q2KIT5, O18977, F1MYW1, Q28019, F1MPE9, G5E5W9, E1BBU2, E1BPS6, P48733, E1BGE0, F1MLR3, G3X812, G3X6N5, E1B949, F1MN54, F1MLJ7, E1BPZ1, F1MYL5, E1BL59, A4FV93, F1MXE0, F1MKV7, F1MC84, F1MSI2, F1MYX9, E1BE11, E1BLD9, E1BNJ1, G3N1F4, F1N2V0, E1BGJ0, E1B9K4, F1N444, F1N6H1, F1MD77, F1MHH5, F1N6Y9, A5D7M5, F1MIY8, E1BJ11, G1K1H0, F1N740, Q5E9P5, F1MER7, F1MZD0, F1MNH3, E1B9M8	1806	197	16802	2.26683	0.000229734	3.82927e-05	0.000174892	6.61081e-13	A6QQT1, A6QP76, F1N570, F1N2Y8, O18977, F1MYW1, F1MPE9, P48733, G3X812, E1B949, A3KN33, Q95116, E1BPZ1, A7YY58, E1BGJ5, F1MXE0, Q28178, F1MYX9, E1BE11, E1BLD9, E1BNJ1, E1BGJ0, A2VE41, F1MEG3, F1MHH5, F1N740, F1MER7, A5PJW9, E1BMV3, E1BG77, P98133, F1MCT1, E1BPS6, E1BBM9, F1MJQ2, E1BMG7, Q06807, F1MN54, F1MMT2, G3N1H6, E1BEY2, A7E306, F1MKV7, F1MJF1, E1BDK6, E1BPT8, E1B9K4, F1N6H1, G1K1H0, F1MDE1,…	1411	197	16802	3.08275	1.31478e-09	4.38261e-10	1.13578e-09	1.09534e-07	F1MYW1, E1B7E1, E1BBU2, F1MCT1, E1BPS6, E1BMG7, P48733, E1BJ49, Q28062, O62664, E1BGE0, F1MLR3, G3X812, E1BKL9, A4IFA5, G3X6N5, F1MSW0, F1MNT4, F1MEX4, Q06805, F1MYL5, F1MSI2, E1BE11, F1MQ74, F1MET4, E1BGJ0, E1BK92, E1B9K4, F1N6H1, F1MEG3, F1MHH5, F1MD94, F1N6Y9, F1MTZ4, F1N740, F1MER7, F1MDE1, F1MNH3, E1B9M8, E1BMV3, F1MUS6	1405	197	16802	2.48887	0.000213459	3.55797e-05	0.000187756
IPR003961:Fibronectin, type III	2.32956e-07	O18977, E1BJQ3, Q95141, F1MYK8, F1MPN0, E1B8X1, F1MSV1, F1MTF9, F1N6H6, A7MBJ4, E1B755, E1BPU9, E1BBE9, F1MX14, F1MLR3, G3MYY6, F1N3R6, A7MBC4, F1MNG8, E1BCJ9, F1MGX7, F1MN54, E1BNH9, F1MXJ6, E1BP05, E1BPZ1, V6F9B3, E1BJ31, E1BE71, E1B864, F1N4K6, E1B7H2, A6QP89, F1MGK5, G3MZU6, G3MZJ5, E1BB91, F1MM03, E1BLM2, F1MJR2, F1MPI1, E1BF00, E1BBI3, E1BA43, F1MGK8, G3MYX8	1806	190	16802	2.25241	0.000534492	5.34621e-05	0.000406959	1.41125e-08	Q1KZG2, O18977, E1BFE2, F1MXS0, F1MPN0, E1B8X1, F1MTF9, E1B755, F1MY47, F1N199, E1BPU9, F1MNG8, Q06807, F1MGX7, F1MN54, F1MXH7, E1BPC9, A3KN33, E1BP05, G5E5S6, E1BIE4, E1BPZ1, F1MFH7, E1BJ31, E1BE71, E1B864, F1N4K6, F1MGK5, G3MZJ5, G3MZU6, F1N008, E1BDP0, G3N022, F1MKR1, E1BJZ1, F1N279, A7MB72, E1BD36, A5D7S4, G3MY74, F1N401, A6H7I1	1411	190	16802	2.63227	2.80693e-05	4.00995e-06	2.42482e-05	1.75249e-05	E1BFE2, E1BA17, E1BDH9, E1BDA9, E1BPU9, F1MHX8, E1BEJ7, F1MX14, F1N269, F1MLR3, A4IFA5, E1BHG3, F1MNG8, Q06805, F1MEQ7, E1BNH9, F1MXJ6, E1BP05, F1MW33, F1MVI0, E1BE71, E1B7U4, G3MZJ5, G3MZU6, E1BB91, E1BLM2, F1N008, F1MC23, E1BDP0, F1MQ74, E1BF00, F1MKB9, F1ME62, G3MY74, F1N401	1405	190	16802	2.20292	0.0335795	0.00262396	0.0300357
GO:0000122~negative regulation of transcription from RNA polymerase II promoter	3.12107e-07	E1BPQ1, A7Z017, F1MKS4, F1N616, F1N4V2, A7MBB7, A4IFD2, Q24K09, E1B806, G3N348, E1BGD3, E1BFX6, E1B7S6, A7MBC4, A5D7H2, E1BE01, Q5E9D3, Q3B7M7, F1MBH4, E1BKA3, F1MVT0, E1BIA9, F1MMF1, E1BJ34, E1BQ37, F1MHU9, F1MBB0, F1N3I6, E1BLZ5, A7YY54, Q5E9B6, F1MFZ9, F1MWW8, Q32LB3, F1ML16, A7MB49, F1N786, G3X8E4, A5D7G2, F1MNA5, A3KMW6, E1BPY4, F1MMY4, E1BMR3, E1B815, F1N3D4, E1B6Z2, F1N215, A7Z034, G3MX46,…	1501	420	13824	1.77619	0.00114571	0.00114571	0.000574666	0.00744218	Q9XT97, F1N616, F1N4V2, E1BJ63, G3N348, E1BGD3, A5D7H2, E1BE01, D0VZF8, A6QPK5, G3MXN4, Q1LZH7, E1BGW5, F1MHU9, A7YY50, E1BLZ5, E1BI30, A8KC64, Q0VBZ5, G3X8E4, E1BPY4, E1BMR3, D2KFG0, F1N215, Q2KIA0, F1MDK3, F1MCY1, E1BCL9, E1BHG2, E1B925, F1MS13, A6H7J1, E1BN44, E1BKC4, E1B7A1, A6QLA0, E1BIT4, A0A0A8JC39, P53781, A7YW40, E1B886, G3X7K5, F1MNS7, F1N6Y2, E1BPT8, A7Z088, F1MBQ8, F1MP88, E1BKK0, A5D…	1190	420	13824	1.43827	1	0.85979	12.652	0.00547622	A6QLW6, F1N4N6, F1MPA7, F1N3U7, A1L503, Q32PH7, A5D7H2, E1B7S6, E1BKA3, F1MVT6, E1BLU8, G3MXN4, E1BIA9, Q1LZH7, F1N7W4, E1BGW5, F1MHU9, E1BQ37, E1BPV9, A2VDR6, E1BLZ5, E1BB99, F1MFZ9, A8KC64, F1MK64, G3MXX8, F1MWS5, Q32XW6, F1N4U8, Q9XSB5, Q2VWH6, F1MHX5, E1BGF9, F1MCY1, F1MYP4, E1BCL9, E1B925, G3X6J7, P28088, A4FV57, E1BH42, E1BN44, E1BKC4, E1B7A1, F1MGM4, E1BIT4, A9CR99, G3X7K5, F1MNS7, F1N6Y2,…	1169	420	13824	1.46411	1	0.843138	9.42674
GO:0005524~ATP binding	1.7402e-06	E1BJM5, E1B7V7, F1MY41, Q3ZBV8, Q58DM2, A3KN07, Q3T084, E1BC41, Q2NKY8, E1B9R5, F1MNE5, A6QP02, F1MEM4, E1BIM8, F1MRN7, F1MBL6, A6QQH7, F1N3B9, G3MWN6, Q1RMS2, Q08DH8, Q9TTA5, A5PK86, E1BB52, E1BPM4, F1MB07, F1MXE2, A2VDN0, E1BEM1, E1B768, E1B8H0, E1BLV6, A7MB49, F1MIP7, E1BBT9, E1BK76, Q27991, G5E556, G3MYX8, F1MMQ6, E1BBM3, E1BMP3, F1MKI1, E1B7X9, G3X7J5, F1MWK1, E1B754, E1BC69, F1N3W6, E1BKW7,…	1418	1224	13095	1.38824	0.00161186	0.000806256	0.00272285	1.51975e-11	F1MWM0, A6QP73, F1N5B2, E1BPU0, E1BNV7, A7YW98, A1A4I4, E1BCS3, E1B9R5, E1BHE5, Q0IIG5, F1MEM4, F1N759, A7MBC5, F1MQJ7, G3X6L9, F1MBL6, F1MCE7, A6QNN6, E1BIE4, F1MFH7, F1N2J2, A2VDN5, A7Z027, E1BB52, E1BPM4, Q5E9Y9, A6QLV0, F1MNU7, F1MWE0, Q8WMV0, E1B715, F1N325, F1MLM2, E1B9Q4, Q17R14, F1MX40, F1MVF1, F1MC51, Q2T9X2, E1BGN7, E1BCE1, P55203, Q27991, G5E556, A6QPE8, E1BBM3, F1MIB7, E1BMP7, F1MPP7,…	1083	1224	13095	1.65961	1.28571e-08	1.28571e-08	2.34995e-08	1.51975e-11	F1MWM0, A6QP73, F1N5B2, E1BPU0, E1BNV7, A7YW98, A1A4I4, E1BCS3, E1B9R5, E1BHE5, Q0IIG5, F1MEM4, F1N759, A7MBC5, F1MQJ7, G3X6L9, F1MBL6, F1MCE7, A6QNN6, E1BIE4, F1MFH7, F1N2J2, A2VDN5, A7Z027, E1BB52, E1BPM4, Q5E9Y9, A6QLV0, F1MNU7, F1MWE0, Q8WMV0, E1B715, F1N325, F1MLM2, E1B9Q4, Q17R14, F1MX40, F1MVF1, F1MC51, Q2T9X2, E1BGN7, E1BCE1, P55203, Q27991, G5E556, A6QPE8, E1BBM3, F1MIB7, E1BMP7, F1MPP7,…	1083	1224	13095	1.65961	1.28571e-08	1.28571e-08	2.34995e-08
IPR000008:C2 calcium-dependent membrane targeting	3.6865e-06	A6QPT0, E1B7B1, A5D784, E1BE66, E1BNT8, Q08DB4, F1N3U6, F1MZM7, E1BKQ2, F1MBT5, F1MBU9, E1BHX7, E1BMQ1, E1B8U8, F1MYG1, F1MP30, E1BH78, F1N415, A4IFJ5, E1BH60, E1BB77, F1N0W4, F1N3I6, F1N3I4, F1MLS5, A0A024QYS0, P10895, F1MF11, P10894, F1MMM4, F1MBI8, E1BJ18, P09851, E1BJ13, Q28013, F1MG30	1806	146	16802	2.294	0.00842485	0.000563877	0.00643989	0.0365701	E1BH60, E1B7B1, F1MUK0, E1BBX9, E1BEA6, E1B886, E1BJB4, A0JN43, A2VE03, F1MFK1, A1A4I4, F1MTE8, A6QQP7, F1MF11, F1MBU9, F1MLS3, E1BGX7, E1BKY4, F1MK99, F1N415	1411	146	16802	1.63121	1	0.499694	47.2776	0.00228423	E1BH60, Q27974, A7Z071, F1MDC9, E1BB77, F1MJ09, E1BPE2, F1N3I4, F1MBT5, E1B7J3, F1N795, F1MF11, P10894, Q17QX4, E1B8D1, F1MBI8, E1BMQ1, A3KMV3, E1BGX7, F1N7B7, E1B796, E1BPM0, F1N415, E1B7V2	1405	146	16802	1.96582	0.988403	0.0886745	3.84411
SM00181:EGF	7.21881e-06	E1BDN7, Q2KIT5, O18977, F1MYW1, Q28019, F1MPE9, G5E5W9, E1BPS6, P48733, E1BGE0, F1MLR3, G3X812, G3X6N5, E1B949, F1MN54, F1MLJ7, E1BPZ1, F1MYL5, E1BL59, A4FV93, F1MXE0, F1MKV7, F1MC84, F1MSI2, F1MYX9, E1BE11, E1BNJ1, G3N1F4, F1N2V0, E1BGJ0, E1B9K4, F1N444, F1MD77, F1N6H1, F1MHH5, F1N6Y9, E1BJ11, F1N740, Q5E9P5, F1MER7, F1MZD0, F1MNH3, E1B9M8	1193	156	8740	2.01937	0.00353818	0.00118079	0.0103683	1.19033e-09	A6QQT1, A6QP76, F1N570, F1N2Y8, O18977, F1MYW1, P98133, F1MPE9, F1MCT1, E1BPS6, E1BMG7, P48733, G3X812, E1B949, Q06807, F1MN54, F1MMT2, Q95116, A3KN33, E1BPZ1, A7YY58, G3N1H6, F1MXE0, E1BGJ5, E1BEY2, A7E306, F1MKV7, E1BDK6, F1MJF1, F1MYX9, Q28178, E1BE11, E1BPT8, E1BNJ1, E1BGJ0, E1B9K4, F1N6H1, A2VE41, F1MEG3, F1MHH5, F1N740, F1MER7, F1MDE1, A5PJW9, F1MNH3, E1BMV3	985	156	8740	2.61643	5.85642e-07	5.85642e-07	1.71024e-06	2.29553e-06	F1MYW1, E1B7E1, F1MCT1, E1BPS6, E1BMG7, P48733, E1BJ49, Q28062, E1BGE0, F1MLR3, G3X812, E1BKL9, A4IFA5, G3X6N5, F1MNT4, F1MEX4, Q06805, F1MYL5, F1MSI2, E1BE11, F1MQ74, F1MET4, E1BGJ0, E1BK92, E1B9K4, F1N6H1, F1MEG3, F1MHH5, F1MD94, F1N6Y9, F1MTZ4, F1N740, F1MER7, F1MDE1, F1MNH3, E1B9M8, E1BMV3, F1MUS6	940	156	8740	2.26487	0.00103704	0.00103704	0.00325868
IPR002110:Ankyrin repeat	8.41543e-06	F1MB71, A7Z034, F1MYK8, E1BJK1, P79100, F1MAV4, F1MPE9, A7MBB7, F1MGH2, O97902, G3X812, Q08E59, F1MML3, F1MCA3, F1MMV0, E1BN43, G3X7P4, G5E5G8, A6QR20, A4IFL7, E1BFD6, E1BMY0, F1MBJ0, E1BAT5, F1N6C1, F1MSK0, E1BNU3, E1BMF4, E1B9S2, A0JN59, G3N3W0, E1BKN6, F1N1B8, F1MDC0, A7VJS4, F1MWG7, G3X8E4, F1N0U2, E1BP31, G5E618, F1MZ03, E1B8R5, E1BIJ3, A5PK11	1806	202	16802	2.02649	0.0191282	0.00113544	0.0147002	4.8029e-06	F1MB71, E1BLC3, E1BIQ2, F1MPE9, A7YY60, F1MI56, F1MFJ2, E1BHC8, O97902, G3X812, F1MMV0, Q08DV6, E1BFD6, E1BB02, F1MBJ0, Q1LZH7, F1MUQ4, E1BBN5, F1MNU7, E1BAT5, A6QLV0, F1MSK0, G3X6E6, E1BPT8, E1BMF4, F1MDC0, A3KMY6, E1BNC9, G3X8E4, E1BHD7, F1N0U2, G5E618, F1MNU9, F1N768, E1BJI4, E1BIJ3, E1BCE6, F1N545	1411	202	16802	2.24009	0.00950751	0.000530581	0.00825209	0.0179773	E1BLC3, F1MB71, F1MRL0, A5PK26, G3X812, Q8HXA6, F1ME24, G5E5G8, E1B7G6, F1MNR3, F1N3B2, Q1LZH7, E1BLD1, E1BBN5, F1MVI7, F1MNU7, F1N6C1, F1MKZ2, E1BHY2, E1BNU3, E1BMF4, A0JN59, F1N2I4, E1BA04, E1BMN7, E1BJI4, E1BFU2	1405	202	16802	1.59844	1	0.346871	26.7255
compositionally biased region:Pro-rich	1.44403e-05	A7Z026, Q2YDD2, Q4JF29, Q5BIR3, A0JND4, Q08E53, E1B716, Q29RN8, Q6T8E9, Q0P5L0, O97902, Q29RK0, A6QR00, Q9XSC3, Q0VCC5, Q0P5J8, Q0P5D2, Q08DG7, F1N3D4, A4FV52, P55106	351	124	6267	3.02378	0.0183139	0.0183139	0.02353	0.00669069	A7Z063, P98133, A2VE02, A6QLU3, Q17QF3, A7MB34, O97902, Q0VC16, Q9XSC3, Q0P5B1, Q9GMA3, Q0P5J8, A6QPM3	270	124	6267	2.43342	0.998718	0.565011	10.0537	0.00257249	Q0P5M0, Q5E9L3, A7Z026, A7Z063, Q27974, A7Z019, A5PJN8, Q17R13, Q28062, A7MB34, A5D7H5, A5D7F8, Q3Y598, A6QPM3, Q08DM2	305	124	6267	2.48559	0.942238	0.378262	4.0386
bta04510:Focal adhesion	1.8139e-05	O18977, A6QPT0, E1BMP3, E1BE66, F1MFD1, F1N2Y2, F1MDD9, F1MJQ6, F1MTP1, E1BE25, P02453, F1MIX6, F1N0T1, Q32S24, F1MWF1, E1BIM8, P02459, E1BI98, F1MDH3, E1B801, F1MZU6, Q0VCX4, E1BDD5, F1MT98, E1B864, F1MVW3, F1MD40, E1BB91, F1MYX9, E1B716, Q9XS49, F1N7Q7, A0A024QYS0, F1MD77, F1N7C3, F1MJY9, E1BCV1, F1MQI1	658	208	7550	2.09624	0.00468703	0.00156479	0.0236928	1.42114e-08	A6QQT1, O18977, F1N0R5, Q3B7N2, P80747, P80746, F1MJQ6, F1N5N3, F1MTP1, E1BGA0, F1MDD5, E1BE25, P02453, F1MIX6, F1N0T1, Q32S24, F1N759, F1MQJ7, E1BM23, F1MBA3, P02459, F1MMN6, E1BNM2, F1MJ71, F1MDH3, F1MMT2, Q95116, F1MZU6, E1B864, F1MY55, F1MD40, E1BDK6, F1MYX9, Q28178, Q7SIB2, P02465, F1MEG3, F1N768, F1MQI1	515	208	7550	2.74879	3.73758e-06	1.86879e-06	1.86091e-05	0.00668395	F1MK44, F1MJQ6, F1MTP1, E1BGA0, F1MDD5, P02453, F1N269, F1N0T1, Q32S24, F1MMN6, E1BI98, F1MNT4, F1MDH3, Q28862, F1MZU6, P80012, E1BB91, F1MD40, F1N7Q7, E1BKX7, Q7SIB2, F1MEG3, F1N474, G3MZE2, F1MQI1, F1MUS6	539	208	7550	1.75093	0.830888	0.358726	8.41665
GO:0015629~actin cytoskeleton	1.97842e-05	E1BMP3, E1BDC7, Q3ZBV8, F1MGR9, A7Z032, G3MZK6, F1MCK2, F1MUH9, E1BLC6, F1N469, Q3T0G8, E1BM06, Q9TTS3, F6QPK8, E1BBS9, F6RHP0, E1B801, Q32LP9, E1BCL1, E1B7Y3, G3X7K6, F1MTM9, F1MSE6, Q3MHM6, E1BA93, G3X6R3, F1N6I9, F6R8E7, E1B8H0, F1N6S8, E1BNR0, E1BP52, A4IFK4	1648	133	15461	2.25725	0.0132462	0.00443503	0.0296805	0.0150792	F1MK51, A7YWJ7, G3X7K6, F1MTM9, F1MXG8, Q3MHM6, F1N6I9, G3X684, E1BPT8, F1MCK2, E1BLC6, E1BBZ3, E1BHC8, F1N6S8, F1N7Q8, E1BM06, F6QPK8, E1BNR0, Q1RMT6, G3MYD5	1297	133	15461	1.79257	0.99991	0.387502	20.1534	0.00251665	E1BEN8, F1MRL0, F1MXG8, E1BP80, G3X6R3, F1MKU1, E1BF57, F6R8E7, F1MCK2, E1B8H0, E1BK18, F1N6S8, E1BBQ0, Q5EAD3, E1BBS9, E1BNR0, A6QR41, Q32LP9, E1BCL1, E1B7Y3, E1BP52, E1BFU2	1262	133	15461	2.02651	0.786075	0.265398	3.6629
GO:0045944~positive regulation of transcription from RNA polymerase II promoter	2.36864e-05	E1BPQ1, A7Z017, E1BDN7, E1BC87, E1BEN9, F1MKS4, Q2TEA4, B0JYK8, E1BAG4, M5FMX2, E1BC86, A7MBB7, Q8SQG8, A0JNC9, E1BGA4, F1MVD0, A4IFD2, F1N264, A3KN07, P98201, E1BND5, Q8SQ19, A4IFH3, A5D7H2, E1BE01, G3N346, E1BPP7, Q5EA36, Q27981, E1B9N8, A6QLJ0, E1BPM4, A6QLB8, E1BJ34, F1MBB0, Q645M6, E1BAD7, A7YY54, Q5E9B6, F1MWW8, Q9BE97, Q3ZCD0, F1MNA5, E1BIV1, E1BPY4, F1MIH1, E1BFN3, A7MB57, F1N1Z3, F1N3D4,…	1501	580	13824	1.52439	0.0833239	0.042568	0.0436036	0.0161626	G3XCF6, E1BIQ2, F1MME0, E1BC86, F1MVD0, F1N264, A6H727, F1ML06, A5D7H2, Q9BDI3, E1BE01, G3N346, E1BPP7, E1B7W1, E1BFT2, A6QPK5, G3MXN4, E1BDS6, E1BPM4, Q58DJ0, F1MKX9, Q3SZK6, A0JNB7, F1MNB5, E1BAD7, E1BI30, Q0VBZ5, F1N4Q7, Q0VCS4, E1BPY4, F1MIH1, D2KFG0, A7MB57, E1B6Z5, E1BCE6, E1B8T3, F1MIB3, A8E4N8, F1N215, F1MG84, A6QNT0, E1BNX4, F1N2W4, G3MWW2, Q2KIA0, F1MDK3, Q0VCT9, Q0VCF8, A2VDW9, E1BKC4,…	1190	580	13824	1.32191	1	0.882668	25.5521	0.0114107	E1B7V5, E1BC86, D3JUI8, A0JNC9, F1MVD0, E1BND5, E1BLQ9, A5D7H2, F1N0I1, F1MVT6, E1BFT2, Q5EA36, E1BLU8, G3MXN4, F1MNR3, E1B9N8, F1MGQ7, E1BPM4, A6QLB8, E1BB99, A1A4H5, Q9BE97, E1BD99, F1MMY9, E1BKZ6, F1N4U8, E1B6Z5, Q2VWH6, F1N1Z3, E1B8T3, F1MIB3, A8E4N8, E1BNX4, F1MKU1, Q0VCF8, G3X6Y3, E1BHG3, A0JNJ0, E1BIC4, A2VE49, F1MM51, Q5I2M5, Q2HJ84, G3X6J7, E1BKC4, A5D7F6, F1MHA1, A4IFN7, E1BIT4, P28800,…	1169	580	13824	1.34566	1	0.809697	18.6919
IPR013098:Immunoglobulin I-set	2.88602e-05	F1N3H2, A7MBJ4, F1MDD9, E1BAU3, F1MX14, G3MYY6, E1BCW5, F1MWF1, F1MGX7, E1BNH9, F1MXJ6, E1BPK8, E1BE71, E1BGL8, F1N4K6, A6QP89, G3MZU6, A5PJP9, F1MM03, F1MJR2, E1BLM2, E1BE11, F1MPI1, E1B9K4, F1MBT2, E1BBI3, F1N7L3, F1MER7, E1BPQ9, F1MWK8	1806	122	16802	2.28773	0.0640893	0.0026459	0.050405	0.0001839	E1BGL8, E1BE71, F1N4K6, F1MXS0, G3MZU6, A7Z067, E1BE11, E1BDP0, E1BKP7, G3N022, E1BAU3, F1N199, F1MPU4, F1MK80, F1N279, E1B9K4, F1MZV0, F1N759, A7MB72, F1MLS2, F1MGX7, E1BPC9, F1MER7, A6H7I1	1411	122	16802	2.34253	0.306367	0.00983809	0.31551	0.000172716	E1BE71, F1MKY9, E1B7U4, F1N3H2, G3MZU6, E1BIT3, G3N1F0, E1BLM2, E1BE11, E1BDP0, F1MKB9, F1N269, F1MX14, E1B9K4, F1MQI5, E1BN69, F1MLS2, E1BHG3, F1MCY5, E1BNH9, F1MXJ6, F1MER7, F1MW33, F1MVI0	1405	122	16802	2.35253	0.285844	0.0151859	0.295647
IPR001849:Pleckstrin homology domain	3.99436e-05	F1MDV3, F1MQ44, F1MNV2, F1MIM9, E1BNT8, F1MH50, Q1KZG5, A7Z032, F1MJE0, F1MBT5, E1BJC1, O97902, F1MRW6, F1N657, F1MYE0, F1MM72, F1MJV1, F1MYC9, F1MXJ6, A4IFL7, A6QP95, F1MLJ5, F1MCG9, F1N1Q7, E1BH60, F1MQ30, E1BPM7, E1B7C4, F1N6I9, E1BB77, E1BMD4, E1BK14, F1MZA2, P21146, A7MB96, F1MUS9, F1MF11, P10895, F1MGG8, F1MBI8, F1N7C3, F1MZ03, E1BLT3, F1MRH8, P09851, Q28013, F1MSU8	1806	235	16802	1.86069	0.0875959	0.00326866	0.0697559	0.000143845	F1MPJ6, E1BIQ2, F1MH50, Q1KZG5, E1BAW4, F1MJE0, A6QR57, F1MD97, A6QLU3, O97902, F1MHG5, F1N657, F1MW59, F1MJV1, E1BKY4, E1BB02, A6QP95, A6QPU2, E1BH60, G3N3K9, F1MQ30, E1BPM7, F1N6I9, A5PK34, E1B7L9, F1MUS9, A3KMY6, E1BE90, F1MF11, F1MTH3, A7MB72, A4IFK0, F1MLS2, E1BLT3, F1MKE9, F1MLS3, E1BJV9, F1MSU8	1411	235	16802	1.92553	0.248834	0.00814176	0.246869	7.73055e-07	A7YWQ4, F1MTN6, G5E6T2, F1MJE0, A5PK26, G3X6F7, G5E580, F1MBT5, F1MHG5, F1N657, F1N795, E1B9P1, F1MYE0, F1MW59, Q3ZCE1, F1MX58, F1MXJ6, E1BPM0, F1MLJ5, F1MCG9, A7Z039, F1N1Q7, A6QPU2, E1BH60, F1MFX6, E1BPM7, E1B7C4, F1MKZ2, E1BB77, E1BK14, F1MKZ3, F1MBM9, E1BF01, A5PK34, F1MKZ7, E1BG38, F1MF11, F1N2G5, F1MKP9, F1MLS2, F1MBI8, F1MZF1, F1MSU8, Q0P5E6	1405	235	16802	2.23908	0.00150555	0.000215217	0.00132511
GO:0000978~RNA polymerase II core promoter proximal region sequence-specific DNA binding	6.58465e-05	E1BC87, E1BNZ8, F1MGR9, A7MBB7, F1MNA3, F1N4J1, E1BNL6, A0JNC9, A4IFD2, Q8SQ19, E1BLY0, E1B7S6, E1BPP7, E1BN65, B2CML0, E1BJ30, E1BPM4, F1MW83, F1MSU2, E1BAD7, E1BI80, A7YY54, Q5E9B6, E1BFW7, E1B8C0, F1MW46, E1BPY4, F1N215, E1BA84, E7E1K7, F1MZB6, E1BL43, A6QLQ3, Q08DJ8, F1MCY1, E1BFK8, E1BLS1, E1BD25, G3X6J7, A4FV57, F1MV76, Q1LZF1, F1MT17, F1MT98, Q6VFT7, E1BI59, A9CR99, Q08E02, Q3B7M4, E1BJP4,…	1418	273	13095	1.75902	0.059216	0.010122	0.102981	5.6277e-06	E1BEL3, F1N215, A6QNT0, F1MR87, E1BME7, E1BGZ6, E1BNL6, Q2KIA0, A6QLQ3, F1MDK3, F1MAZ9, A6H727, E1BLY0, F1MCY1, F1ML06, E1BCL9, E1BJ03, E1BPP7, A6H7J1, F1MV76, A6QPK5, Q05B92, E1BBZ8, E1BJ30, E1BPM4, E1BIT4, F1N2B6, E1BJD1, E1BAD7, F1MLM2, E1BJR9, E1BFW7, E1BKK0, F1MU46, Q0VBZ5, A5D7C5, E1BMR0, Q0VCS4, Q08DI0, G5E5H1, E1BPY4, F1MW46, F1N3F6, E1BH37, D2KFG0, F1CYZ1	1083	273	13095	2.03738	0.00474973	0.00158576	0.00870163	0.0335621	E1B7V5, F1N4N6, E1BNZ8, E1BME7, A7Z019, E1BIJ8, F1MBX3, A0JNC9, F1MCY1, E1BLY0, E1BCL9, E1B7S6, A4FV57, G3X6J7, E1BCC6, E1BLU8, E1BII2, G3MYL5, E1BPM4, E1BIT4, F1MW83, E1BI59, A9CR99, E1BGW3, F1MSU2, A3KN18, E1BJD1, Q32LN0, E1BI80, G5E5H1, F1N3F6, G3N2P1, Q2VWH6	1100	273	13095	1.43901	1	0.716349	40.8473
IPR009030:Insulin-like growth factor binding protein, N-terminal	6.87938e-05	Q2KIT5, E1BDN7, E1BJ31, Q28019, E1BL59, F1MPE9, F1MKV7, F1MIM6, F1MSI2, E1BE11, P48733, P01267, E1BGJ0, E1BGE0, G3X812, E1B9K4, F1N444, F1N6H1, F1N3R6, G3X6N5, E1B949, F1N6Y9, E1BJ11, F1N740, F1MZD0, F1MNH3, E1B9M8	1806	109	16802	2.30452	0.146054	0.00508019	0.12011	8.17957e-07	P98133, F1MPE9, F1MCT1, P48733, G3X812, F1MW38, E1B949, F1MMT2, E1BIE4, F1MFH7, A7YY58, E1BJ31, E1BGJ5, E1BEY2, A7E306, F1MKV7, F1MJF1, E1BE11, E1BPT8, F1MKR1, P01267, E1BGJ0, E1B9K4, F1N6H1, A2VE41, F1N740, F1MNH3	1411	109	16802	2.94966	0.00162559	0.000147891	0.00140542	8.37165e-05	Q28193, A6QR62, F1MSI2, F1MCT1, E1BE11, F1MC23, P48733, F1MQ74, E1BGJ0, E1BGE0, P13384, E1B9K4, G3X812, F1N6H1, G3X6N5, F1MD94, O18739, F1N6Y9, F1MTZ4, F1N740, F1N758, F1MNH3, E1B9M8	1405	109	16802	2.5234	0.150553	0.00902405	0.143404
[truncated: 26 more rows]

## Sheet: REDUNDANT GENES
IPR001965:Zinc finger, PHD-type	E1BLB1 F1N3F6
IPR001487:Bromodomain	A5PKK5
IPR013602:Dynein heavy chain, domain-2	F1N724 F1N5R7 E1BDX8 F1MK55 F1MSP8 E1B9R5
[truncated: 22 more rows]
